# Supplementary material for: ESHRD: deconvolution of brain homogenate RNA expression data to identify cell-type-specific alterations in Alzheimer’s disease
Source: Aging (Albany NY). 2020 Mar 2;12(5):4124–62. doi: 10.18632/aging.102840 (PMC7093163; doi:10.18632/aging.102840)
Supplement: Supplementary Table 1 [file aging-12-102840-s003..xlsx]

## Sheet: Supplementary Table 1
	Astrocytes						Microglia
	Region	Cutoff	Tot	Concordance (%)	Standard Dev		Region	Cutoff	Tot	Concordance (%)	Standard Dev
	CBE	0	52	67.3077	18.9331		CBE	0	160	57.5	3.06569
		0.25	23	65.2174				0.25	97	58.7629
		0.5	7	28.5714				0.5	53	58.4906
		1	3	66.6667				1	14	64.2857
	DLPFC	0	25	76	15.8028		DLPFC	0	33	60.6061	6.46903
	DLPFC	0.25	16	87.5			DLPFC	0.25	16	75
	DLPFC	0.5	8	75			DLPFC	0.5	11	72.7273
	DLPFC	1	2	50			DLPFC	1	3	66.6667
	FP	0	4	25	38.1881		FP	0	5	100	0
	FP	0.25	2	50			FP	0.25	3	100
	FP	0.5	1	100			FP	0.5	2	100
	FP	1	-	-			FP	1	-	-
	IFG	0	4	50	25.4588		IFG	0	9	77.7778	13.8889
	IFG	0.25	3	66.6667			IFG	0.25	6	83.3333
	IFG	0.5	2	100			IFG	0.5	3	66.6667
	IFG	1	-	-			IFG	1	1	100
	PHG	0	158	58.8608	11.1966		PHG	0	179	62.5698	2.45924
	PHG	0.25	59	74.5763			PHG	0.25	106	66.0377
	PHG	0.5	22	81.8182			PHG	0.5	49	67.3469
	PHG	1	6	83.3333			PHG	1	16	62.5
	STG	0	17	70.5882	9.38275		STG	0	60	78.3333	9.26286
	STG	0.25	9	88.8889			STG	0.25	39	84.6154
	STG	0.5	6	83.3333			STG	0.5	19	84.2105
	STG	1	-	-			STG	1	5	100
	TCX	0	184	60.3261	16.8149		TCX	0	232	59.4828	4.06003
	TCX	0.25	71	76.0563			TCX	0.25	135	65.1852
	TCX	0.5	23	86.9565			TCX	0.5	77	68.8312
	TCX	1	3	100			TCX	1	21	61.9048
