# Supplementary material for: ESHRD: deconvolution of brain homogenate RNA expression data to identify cell-type-specific alterations in Alzheimer’s disease
Source: Aging (Albany NY). 2020 Mar 2;12(5):4124–62. doi: 10.18632/aging.102840 (PMC7093163; doi:10.18632/aging.102840)
Supplement: Supplementary Table 2 [file aging-12-102840-s002..xlsx]

## Sheet: S2 Table
	Cell	TCX (n = 5,514)		STG (n = 594)		DLPFC (n = 1,363)		FP (n = 282)		IFG (n = 119)		PHG (n = 4,123)		CBE (n = 4,211)		Tot (n = 15,806)		Tot - Unique Gene IDs (n = 8,969)
		N	%	N	%	N	%	N	%	N	%	N	%	N	Perc	N	%	N	%
	Mixed	3712	72.5851	403	67.8451	1110	81.438	230	81.5603	67	56.3025	2998	72.6964	3444	81.7858	11964	75.688	6828	76.1204
	N	333	6.51154	42	7.07071	56	4.10858	16	5.67376	18	15.1261	290	7.03201	161	3.82332	916	5.7949	501	5.58528
	M	300	5.86625	68	11.4478	50	3.66838	7	2.48227	14	11.7647	226	5.48012	220	5.22441	885	5.59879	487	5.42921
	EC	341	6.66797	39	6.56566	49	3.59501	9	3.19149	8	6.72269	216	5.23763	168	3.98955	830	5.25084	465	5.18395
	A	219	4.28236	21	3.53535	39	2.86134	4	1.41844	5	4.20168	196	4.75267	97	2.30349	581	3.67559	318	3.54515
	O	114	2.22917	10	1.6835	44	3.22817	7	2.48227	5	4.20168	125	3.03104	70	1.66231	375	2.37237	230	2.5641
	EC_M	22	0.430192	5	0.841751	2	0.146735	2	0.70922	1	0.840336	17	0.412221	18	0.427452	67	0.423863	30	0.334448
	N_OPC	18	0.351975	3	0.505051	5	0.366838	2	0.70922	0	0	16	0.387973	5	0.118737	49	0.309989	23	0.25641
	A_OPC	12	0.23465	1	0.16835	1	0.0733676	1	0.35461	0	0	11	0.266731	4	0.0949893	30	0.189789	21	0.234114
	A_EC	10	0.195542	1	0.16835	1	0.0733676	0	0	0	0	7	0.169738	5	0.118737	24	0.151831	13	0.144928
	A_N	6	0.117325	0	0	2	0.146735	2	0.70922	0	0	4	0.0969932	5	0.118737	19	0.1202	10	0.111483
	A_N_OPC	1	0.0195542	1	0.16835	1	0.0733676	0	0	1	0.840336	2	0.0484966	2	0.0474947	8	0.0506105	4	0.0445931
	A_EC_OPC	2	0.0391083	0	0	0	0	0	0	0	0	3	0.0727449	2	0.0474947	7	0.0442842	3	0.0334448
	EC_N	4	0.0782167	0	0	1	0.0733676	0	0	0	0	2	0.0484966	0	0	7	0.0442842	6	0.0668896
	M_OPC	3	0.0586625	0	0	0	0	0	0	0	0	1	0.0242483	2	0.0474947	6	0.0379579	5	0.0557414
	MO_N	2	0.0391083	0	0	1	0.0733676	0	0	0	0	0	0	1	0.0237473	4	0.0253052	2	0.0222965
	N_NFO	2	0.0391083	0	0	0	0	0	0	0	0	2	0.0484966	0	0	4	0.0253052	2	0.0222965
	A_EC_N	1	0.0195542	0	0	0	0	1	0.35461	0	0	1	0.0242483	0	0	3	0.0189789	2	0.0222965
	A_N_NFO_OPC	1	0.0195542	0	0	0	0	0	0	0	0	0	0	2	0.0474947	3	0.0189789	2	0.0222965
	EC_NFO	1	0.0195542	0	0	0	0	0	0	0	0	1	0.0242483	1	0.0237473	3	0.0189789	2	0.0222965
	M_N	1	0.0195542	0	0	0	0	0	0	0	0	1	0.0242483	1	0.0237473	3	0.0189789	2	0.0222965
	MO_N_NFO	1	0.0195542	0	0	0	0	0	0	0	0	1	0.0242483	1	0.0237473	3	0.0189789	2	0.0222965
	A_EC_M_OPC	1	0.0195542	0	0	0	0	0	0	0	0	1	0.0242483	0	0	2	0.0126526	1	0.0111483
	A_M	1	0.0195542	0	0	1	0.0733676	0	0	0	0	0	0	0	0	2	0.0126526	2	0.0222965
	EC_N_OPC	1	0.0195542	0	0	0	0	0	0	0	0	1	0.0242483	0	0	2	0.0126526	1	0.0111483
	EC_OPC	1	0.0195542	0	0	0	0	0	0	0	0	0	0	1	0.0237473	2	0.0126526	1	0.0111483
	N_NFO_OPC	1	0.0195542	0	0	0	0	0	0	0	0	1	0.0242483	0	0	2	0.0126526	1	0.0111483
	A_M_N_OPC	0	0	0	0	0	0	1	0.35461	0	0	0	0	0	0	1	0.00632631	1	0.0111483
	A_MO_NFO	1	0.0195542	0	0	0	0	0	0	0	0	0	0	0	0	1	0.00632631	1	0.0111483
	A_NFO_OPC	1	0.0195542	0	0	0	0	0	0	0	0	0	0	0	0	1	0.00632631	1	0.0111483
	EC_MO	0	0	0	0	0	0	0	0	0	0	0	0	1	0.0237473	1	0.00632631	1	0.0111483
	M_MO	1	0.0195542	0	0	0	0	0	0	0	0	0	0	0	0	1	0.00632631	1	0.0111483
