# Supplementary material for: ESHRD: deconvolution of brain homogenate RNA expression data to identify cell-type-specific alterations in Alzheimer’s disease
Source: Aging (Albany NY). 2020 Mar 2;12(5):4124–62. doi: 10.18632/aging.102840 (PMC7093163; doi:10.18632/aging.102840)
Supplement: Supplementary Table 3 [file aging-12-102840-s006..xlsx]

## Sheet: S3A Table - All Genes
	Cell	GO_Group	DataSetID	DataSetName	p	Bonferroni	#Genes	Genes
	N	GO|GO.CC	GO:0097458	neuron part	6.26328e-52	7.13763e-47	156	107 (ADCY1)|116 (ADCYAP1)|478 (ATP1A3)|773 (CACNA1A)|774 (CACNA1B)|793 (CALB1)|794 (CALB2)|885 (CCK)|1006 (CDH8)|1131 (CHRM3)|1141 (CHRNB2)|1261 (CNGA3)|1268 (CNR1)|1392 (CRH)|1393 (CRHBP)|1395 (CRHR2)|1627 (DBN1)|1641 (DCX)|1759 (DNM1)|1813 (DRD2)|2042 (EPHA3)|2046 (EPHA8)|2048 (EPHB2)|2566 (GABRG2)|2571 (GAD1)|2572 (GAD2)|2596 (GAP43)|2742 (GLRA2)|2781 (GNAZ)|2796 (GNRH1)|2903 (GRIN2A)|2904 (GR…
	N	GO|GO.CC	GO:0045202	synapse	2.66628e-41	3.0385e-36	116	107 (ADCY1)|116 (ADCYAP1)|478 (ATP1A3)|774 (CACNA1B)|793 (CALB1)|794 (CALB2)|885 (CCK)|1006 (CDH8)|1131 (CHRM3)|1141 (CHRNB2)|1268 (CNR1)|1393 (CRHBP)|1395 (CRHR2)|1627 (DBN1)|1759 (DNM1)|1813 (DRD2)|1946 (EFNA5)|2048 (EPHB2)|2566 (GABRG2)|2571 (GAD1)|2572 (GAD2)|2596 (GAP43)|2742 (GLRA2)|2796 (GNRH1)|2817 (GPC1)|2903 (GRIN2A)|2904 (GRIN2B)|2906 (GRIN2D)|2912 (GRM2)|3084 (NRG1)|3208 (HPCA)|3747 (…
	N	GO|GO.BP	GO:0007399	nervous system development	3.52724e-40	4.01964e-35	164	107 (ADCY1)|116 (ADCYAP1)|885 (CCK)|1131 (CHRM3)|1141 (CHRNB2)|1268 (CNR1)|1392 (CRH)|1400 (CRMP1)|1608 (DGKG)|1627 (DBN1)|1641 (DCX)|1745 (DLX1)|1749 (DLX5)|1813 (DRD2)|1944 (EFNA3)|1946 (EFNA5)|1951 (CELSR3)|2042 (EPHA3)|2046 (EPHA8)|2048 (EPHB2)|2254 (FGF9)|2281 (FKBP1B)|2334 (AFF2)|2596 (GAP43)|2796 (GNRH1)|2817 (GPC1)|2903 (GRIN2A)|2904 (GRIN2B)|2906 (GRIN2D)|3084 (NRG1)|3208 (HPCA)|3747 (KC…
	N	GO|GO.CC	GO:0043005	neuron projection	1.42181e-38	1.6203e-33	119	116 (ADCYAP1)|478 (ATP1A3)|774 (CACNA1B)|793 (CALB1)|794 (CALB2)|885 (CCK)|1006 (CDH8)|1131 (CHRM3)|1141 (CHRNB2)|1261 (CNGA3)|1268 (CNR1)|1392 (CRH)|1393 (CRHBP)|1395 (CRHR2)|1627 (DBN1)|1641 (DCX)|1759 (DNM1)|1813 (DRD2)|2042 (EPHA3)|2046 (EPHA8)|2048 (EPHB2)|2566 (GABRG2)|2571 (GAD1)|2572 (GAD2)|2596 (GAP43)|2742 (GLRA2)|2781 (GNAZ)|2796 (GNRH1)|2903 (GRIN2A)|2904 (GRIN2B)|2912 (GRM2)|3084 (NR…
	N	GO|GO.CC	GO:0044456	synapse part	3.01329e-38	3.43395e-33	100	107 (ADCY1)|116 (ADCYAP1)|774 (CACNA1B)|793 (CALB1)|794 (CALB2)|885 (CCK)|1006 (CDH8)|1131 (CHRM3)|1141 (CHRNB2)|1268 (CNR1)|1393 (CRHBP)|1395 (CRHR2)|1627 (DBN1)|1759 (DNM1)|1813 (DRD2)|2048 (EPHB2)|2566 (GABRG2)|2571 (GAD1)|2572 (GAD2)|2596 (GAP43)|2742 (GLRA2)|2796 (GNRH1)|2903 (GRIN2A)|2904 (GRIN2B)|2906 (GRIN2D)|2912 (GRM2)|3208 (HPCA)|3747 (KCNC2)|3756 (KCNH1)|4744 (NEFH)|4842 (NOS1)|4923 (…
	N	GO|GO.BP	GO:0099536	synaptic signaling	1.65638e-37	1.88761e-32	87	107 (ADCY1)|116 (ADCYAP1)|773 (CACNA1A)|774 (CACNA1B)|793 (CALB1)|794 (CALB2)|1006 (CDH8)|1131 (CHRM3)|1141 (CHRNB2)|1268 (CNR1)|1392 (CRH)|1393 (CRHBP)|1395 (CRHR2)|1627 (DBN1)|1759 (DNM1)|1813 (DRD2)|1816 (DRD5)|2048 (EPHB2)|2566 (GABRG2)|2571 (GAD1)|2572 (GAD2)|2742 (GLRA2)|2903 (GRIN2A)|2904 (GRIN2B)|2906 (GRIN2D)|2912 (GRM2)|3084 (NRG1)|3350 (HTR1A)|4842 (NOS1)|4887 (NPY2R)|4923 (NTSR1)|4986…
	N	GO|GO.CC	GO:0098793	presynapse	2.65074e-37	3.02078e-32	73	116 (ADCYAP1)|774 (CACNA1B)|793 (CALB1)|794 (CALB2)|885 (CCK)|1006 (CDH8)|1131 (CHRM3)|1141 (CHRNB2)|1268 (CNR1)|1393 (CRHBP)|1395 (CRHR2)|1759 (DNM1)|1813 (DRD2)|2048 (EPHB2)|2571 (GAD1)|2572 (GAD2)|2796 (GNRH1)|2903 (GRIN2A)|2912 (GRM2)|3747 (KCNC2)|3756 (KCNH1)|4842 (NOS1)|4923 (NTSR1)|4986 (OPRK1)|4988 (OPRM1)|5179 (PENK)|5864 (RAB3A)|5865 (RAB3B)|6456 (SH3GL2)|6616 (SNAP25)|6620 (SNCB)|6812 …
	N	GO|GO.BP	GO:0099537	trans-synaptic signaling	6.44031e-37	7.33938e-32	86	107 (ADCY1)|116 (ADCYAP1)|773 (CACNA1A)|774 (CACNA1B)|793 (CALB1)|794 (CALB2)|1006 (CDH8)|1131 (CHRM3)|1141 (CHRNB2)|1268 (CNR1)|1392 (CRH)|1393 (CRHBP)|1395 (CRHR2)|1627 (DBN1)|1759 (DNM1)|1813 (DRD2)|1816 (DRD5)|2048 (EPHB2)|2566 (GABRG2)|2571 (GAD1)|2572 (GAD2)|2742 (GLRA2)|2903 (GRIN2A)|2904 (GRIN2B)|2906 (GRIN2D)|2912 (GRM2)|3350 (HTR1A)|4842 (NOS1)|4887 (NPY2R)|4923 (NTSR1)|4986 (OPRK1)|498…
	N	GO|GO.BP	GO:0007268	chemical synaptic transmission	1.79005e-36	2.03994e-31	85	107 (ADCY1)|116 (ADCYAP1)|773 (CACNA1A)|774 (CACNA1B)|793 (CALB1)|794 (CALB2)|1006 (CDH8)|1131 (CHRM3)|1141 (CHRNB2)|1268 (CNR1)|1392 (CRH)|1393 (CRHBP)|1395 (CRHR2)|1627 (DBN1)|1759 (DNM1)|1813 (DRD2)|1816 (DRD5)|2048 (EPHB2)|2566 (GABRG2)|2571 (GAD1)|2572 (GAD2)|2742 (GLRA2)|2903 (GRIN2A)|2904 (GRIN2B)|2906 (GRIN2D)|2912 (GRM2)|3350 (HTR1A)|4887 (NPY2R)|4923 (NTSR1)|4986 (OPRK1)|4988 (OPRM1)|51…
	N	GO|GO.BP	GO:0098916	anterograde trans-synaptic signaling	1.79005e-36	2.03994e-31	85	107 (ADCY1)|116 (ADCYAP1)|773 (CACNA1A)|774 (CACNA1B)|793 (CALB1)|794 (CALB2)|1006 (CDH8)|1131 (CHRM3)|1141 (CHRNB2)|1268 (CNR1)|1392 (CRH)|1393 (CRHBP)|1395 (CRHR2)|1627 (DBN1)|1759 (DNM1)|1813 (DRD2)|1816 (DRD5)|2048 (EPHB2)|2566 (GABRG2)|2571 (GAD1)|2572 (GAD2)|2742 (GLRA2)|2903 (GRIN2A)|2904 (GRIN2B)|2906 (GRIN2D)|2912 (GRM2)|3350 (HTR1A)|4887 (NPY2R)|4923 (NTSR1)|4986 (OPRK1)|4988 (OPRM1)|51…
	N	GO|GO.CC	GO:0030424	axon	2.19257e-35	2.49865e-30	78	116 (ADCYAP1)|478 (ATP1A3)|793 (CALB1)|885 (CCK)|1006 (CDH8)|1131 (CHRM3)|1261 (CNGA3)|1268 (CNR1)|1392 (CRH)|1393 (CRHBP)|1395 (CRHR2)|1627 (DBN1)|1759 (DNM1)|1813 (DRD2)|2048 (EPHB2)|2566 (GABRG2)|2571 (GAD1)|2572 (GAD2)|2596 (GAP43)|2796 (GNRH1)|2912 (GRM2)|3084 (NRG1)|3208 (HPCA)|3645 (INSRR)|3747 (KCNC2)|3756 (KCNH1)|3800 (KIF5C)|3897 (L1CAM)|4345 (CD200)|4744 (NEFH)|4842 (NOS1)|4923 (NTSR1)…
	N	GO|GO.BP	GO:0007267	cell-cell signaling	7.17382e-34	8.17529e-29	125	107 (ADCY1)|116 (ADCYAP1)|367 (AR)|773 (CACNA1A)|774 (CACNA1B)|781 (CACNA2D1)|793 (CALB1)|794 (CALB2)|1006 (CDH8)|1131 (CHRM3)|1141 (CHRNB2)|1268 (CNR1)|1392 (CRH)|1393 (CRHBP)|1395 (CRHR2)|1627 (DBN1)|1749 (DLX5)|1759 (DNM1)|1813 (DRD2)|1816 (DRD5)|1944 (EFNA3)|1946 (EFNA5)|1951 (CELSR3)|2048 (EPHB2)|2254 (FGF9)|2281 (FKBP1B)|2566 (GABRG2)|2571 (GAD1)|2572 (GAD2)|2587 (GALR1)|2696 (GIPR)|2742 (G…
	N	GO|GO.CC	GO:0036477	somatodendritic compartment	6.01394e-30	6.85348e-25	84	116 (ADCYAP1)|478 (ATP1A3)|773 (CACNA1A)|774 (CACNA1B)|793 (CALB1)|794 (CALB2)|885 (CCK)|1131 (CHRM3)|1261 (CNGA3)|1392 (CRH)|1393 (CRHBP)|1395 (CRHR2)|1627 (DBN1)|1759 (DNM1)|1813 (DRD2)|2048 (EPHB2)|2566 (GABRG2)|2781 (GNAZ)|2796 (GNRH1)|2912 (GRM2)|3208 (HPCA)|3350 (HTR1A)|3623 (INHA)|3747 (KCNC2)|3756 (KCNH1)|3800 (KIF5C)|3897 (L1CAM)|4345 (CD200)|4842 (NOS1)|4923 (NTSR1)|4986 (OPRK1)|4988 (O…
	N	GO|GO.BP	GO:0022008	neurogenesis	1.94487e-28	2.21637e-23	115	107 (ADCY1)|116 (ADCYAP1)|885 (CCK)|1141 (CHRNB2)|1268 (CNR1)|1400 (CRMP1)|1608 (DGKG)|1627 (DBN1)|1641 (DCX)|1745 (DLX1)|1749 (DLX5)|1813 (DRD2)|1944 (EFNA3)|1946 (EFNA5)|1951 (CELSR3)|2042 (EPHA3)|2046 (EPHA8)|2048 (EPHB2)|2281 (FKBP1B)|2596 (GAP43)|2796 (GNRH1)|2817 (GPC1)|2903 (GRIN2A)|3084 (NRG1)|3800 (KIF5C)|3897 (L1CAM)|3925 (STMN1)|4674 (NAP1L2)|4744 (NEFH)|4804 (NGFR)|4842 (NOS1)|4988 (O…
	N	GO|GO.CC	GO:0120025	plasma membrane bounded cell projection	2.9095e-27	3.31566e-22	133	58 (ACTA1)|116 (ADCYAP1)|284 (ANGPT1)|478 (ATP1A3)|774 (CACNA1B)|793 (CALB1)|794 (CALB2)|885 (CCK)|1006 (CDH8)|1131 (CHRM3)|1141 (CHRNB2)|1261 (CNGA3)|1268 (CNR1)|1392 (CRH)|1393 (CRHBP)|1395 (CRHR2)|1627 (DBN1)|1641 (DCX)|1759 (DNM1)|1813 (DRD2)|1816 (DRD5)|2042 (EPHA3)|2046 (EPHA8)|2048 (EPHB2)|2566 (GABRG2)|2571 (GAD1)|2572 (GAD2)|2596 (GAP43)|2742 (GLRA2)|2781 (GNAZ)|2796 (GNRH1)|2903 (GRIN2A…
	N	GO|GO.BP	GO:0030182	neuron differentiation	2.95676e-27	3.36952e-22	103	107 (ADCY1)|116 (ADCYAP1)|885 (CCK)|1141 (CHRNB2)|1268 (CNR1)|1400 (CRMP1)|1608 (DGKG)|1627 (DBN1)|1641 (DCX)|1745 (DLX1)|1749 (DLX5)|1813 (DRD2)|1944 (EFNA3)|1946 (EFNA5)|1951 (CELSR3)|2042 (EPHA3)|2046 (EPHA8)|2048 (EPHB2)|2281 (FKBP1B)|2596 (GAP43)|2817 (GPC1)|3084 (NRG1)|3800 (KIF5C)|3897 (L1CAM)|3925 (STMN1)|4674 (NAP1L2)|4744 (NEFH)|4804 (NGFR)|5063 (PAK3)|5121 (PCP4)|5274 (SERPINI1)|5599 (…
	N	GO|GO.CC	GO:0042995	cell projection	5.76095e-27	6.56517e-22	135	58 (ACTA1)|116 (ADCYAP1)|284 (ANGPT1)|478 (ATP1A3)|773 (CACNA1A)|774 (CACNA1B)|793 (CALB1)|794 (CALB2)|885 (CCK)|1006 (CDH8)|1131 (CHRM3)|1141 (CHRNB2)|1261 (CNGA3)|1268 (CNR1)|1392 (CRH)|1393 (CRHBP)|1395 (CRHR2)|1627 (DBN1)|1641 (DCX)|1759 (DNM1)|1813 (DRD2)|1816 (DRD5)|2042 (EPHA3)|2046 (EPHA8)|2048 (EPHB2)|2566 (GABRG2)|2571 (GAD1)|2572 (GAD2)|2596 (GAP43)|2742 (GLRA2)|2781 (GNAZ)|2796 (GNRH1…
	N	GO|GO.BP	GO:0048699	generation of neurons	1.21386e-26	1.38331e-21	108	107 (ADCY1)|116 (ADCYAP1)|885 (CCK)|1141 (CHRNB2)|1268 (CNR1)|1400 (CRMP1)|1608 (DGKG)|1627 (DBN1)|1641 (DCX)|1745 (DLX1)|1749 (DLX5)|1813 (DRD2)|1944 (EFNA3)|1946 (EFNA5)|1951 (CELSR3)|2042 (EPHA3)|2046 (EPHA8)|2048 (EPHB2)|2281 (FKBP1B)|2596 (GAP43)|2796 (GNRH1)|2817 (GPC1)|3084 (NRG1)|3800 (KIF5C)|3897 (L1CAM)|3925 (STMN1)|4674 (NAP1L2)|4744 (NEFH)|4804 (NGFR)|4842 (NOS1)|4988 (OPRM1)|5063 (PA…
	N	GO|GO.BP	GO:0048666	neuron development	6.2807e-26	7.15748e-21	90	107 (ADCY1)|116 (ADCYAP1)|885 (CCK)|1141 (CHRNB2)|1268 (CNR1)|1400 (CRMP1)|1608 (DGKG)|1627 (DBN1)|1641 (DCX)|1749 (DLX5)|1813 (DRD2)|1944 (EFNA3)|1946 (EFNA5)|1951 (CELSR3)|2042 (EPHA3)|2046 (EPHA8)|2048 (EPHB2)|2281 (FKBP1B)|2596 (GAP43)|2817 (GPC1)|3800 (KIF5C)|3897 (L1CAM)|3925 (STMN1)|4744 (NEFH)|4804 (NGFR)|5063 (PAK3)|5274 (SERPINI1)|5599 (MAPK8)|5864 (RAB3A)|6014 (RIT2)|6092 (ROBO2)|6456 …
	N	GO|GO.BP	GO:0031175	neuron projection development	5.58618e-24	6.36601e-19	81	107 (ADCY1)|116 (ADCYAP1)|885 (CCK)|1141 (CHRNB2)|1268 (CNR1)|1400 (CRMP1)|1627 (DBN1)|1749 (DLX5)|1813 (DRD2)|1944 (EFNA3)|1946 (EFNA5)|1951 (CELSR3)|2042 (EPHA3)|2046 (EPHA8)|2048 (EPHB2)|2281 (FKBP1B)|2596 (GAP43)|2817 (GPC1)|3800 (KIF5C)|3897 (L1CAM)|3925 (STMN1)|4744 (NEFH)|4804 (NGFR)|5063 (PAK3)|5274 (SERPINI1)|5864 (RAB3A)|6014 (RIT2)|6092 (ROBO2)|6456 (SH3GL2)|6585 (SLIT1)|6616 (SNAP25)|…
	N	GO|GO.CC	GO:0033267	axon part	3.21006e-23	3.65819e-18	50	116 (ADCYAP1)|793 (CALB1)|885 (CCK)|1006 (CDH8)|1131 (CHRM3)|1261 (CNGA3)|1268 (CNR1)|1392 (CRH)|1393 (CRHBP)|1395 (CRHR2)|1627 (DBN1)|1759 (DNM1)|1813 (DRD2)|2571 (GAD1)|2596 (GAP43)|2796 (GNRH1)|3747 (KCNC2)|3756 (KCNH1)|3800 (KIF5C)|3897 (L1CAM)|4842 (NOS1)|4923 (NTSR1)|4986 (OPRK1)|5179 (PENK)|5864 (RAB3A)|6092 (ROBO2)|6616 (SNAP25)|6855 (SYP)|7070 (THY1)|7224 (TRPC5)|7345 (UCHL1)|7786 (MAP3K…
	N	GO|GO.BP	GO:0048812	neuron projection morphogenesis	4.09086e-23	4.66195e-18	64	107 (ADCY1)|885 (CCK)|1141 (CHRNB2)|1400 (CRMP1)|1749 (DLX5)|1813 (DRD2)|1944 (EFNA3)|1946 (EFNA5)|1951 (CELSR3)|2046 (EPHA8)|2048 (EPHB2)|2596 (GAP43)|2817 (GPC1)|3800 (KIF5C)|3897 (L1CAM)|3925 (STMN1)|4744 (NEFH)|4804 (NGFR)|5063 (PAK3)|5864 (RAB3A)|6092 (ROBO2)|6456 (SH3GL2)|6585 (SLIT1)|6812 (STXBP1)|6857 (SYT1)|6860 (SYT4)|7070 (THY1)|7224 (TRPC5)|7345 (UCHL1)|8851 (CDK5R1)|9211 (LGI1)|9253 …
	N	GO|GO.CC	GO:0043025	neuronal cell body	9.16629e-23	1.04459e-17	56	116 (ADCYAP1)|478 (ATP1A3)|773 (CACNA1A)|774 (CACNA1B)|793 (CALB1)|885 (CCK)|1261 (CNGA3)|1392 (CRH)|1393 (CRHBP)|1813 (DRD2)|2048 (EPHB2)|2796 (GNRH1)|3208 (HPCA)|3623 (INHA)|3747 (KCNC2)|3756 (KCNH1)|3800 (KIF5C)|3897 (L1CAM)|4345 (CD200)|4923 (NTSR1)|4986 (OPRK1)|4988 (OPRM1)|5136 (PDE1A)|5179 (PENK)|5274 (SERPINI1)|6456 (SH3GL2)|6750 (SST)|6860 (SYT4)|6861 (SYT5)|7070 (THY1)|7224 (TRPC5)|7345…
	N	GO|GO.BP	GO:0120039	plasma membrane bounded cell projection morphogenesis	1.36471e-22	1.55522e-17	64	107 (ADCY1)|885 (CCK)|1141 (CHRNB2)|1400 (CRMP1)|1749 (DLX5)|1813 (DRD2)|1944 (EFNA3)|1946 (EFNA5)|1951 (CELSR3)|2046 (EPHA8)|2048 (EPHB2)|2596 (GAP43)|2817 (GPC1)|3800 (KIF5C)|3897 (L1CAM)|3925 (STMN1)|4744 (NEFH)|4804 (NGFR)|5063 (PAK3)|5864 (RAB3A)|6092 (ROBO2)|6456 (SH3GL2)|6585 (SLIT1)|6812 (STXBP1)|6857 (SYT1)|6860 (SYT4)|7070 (THY1)|7224 (TRPC5)|7345 (UCHL1)|8851 (CDK5R1)|9211 (LGI1)|9253 …
	N	GO|GO.BP	GO:0048858	cell projection morphogenesis	1.48535e-22	1.6927e-17	64	107 (ADCY1)|885 (CCK)|1141 (CHRNB2)|1400 (CRMP1)|1749 (DLX5)|1813 (DRD2)|1944 (EFNA3)|1946 (EFNA5)|1951 (CELSR3)|2046 (EPHA8)|2048 (EPHB2)|2596 (GAP43)|2817 (GPC1)|3800 (KIF5C)|3897 (L1CAM)|3925 (STMN1)|4744 (NEFH)|4804 (NGFR)|5063 (PAK3)|5864 (RAB3A)|6092 (ROBO2)|6456 (SH3GL2)|6585 (SLIT1)|6812 (STXBP1)|6857 (SYT1)|6860 (SYT4)|7070 (THY1)|7224 (TRPC5)|7345 (UCHL1)|8851 (CDK5R1)|9211 (LGI1)|9253 …
	N	GO|GO.CC	GO:0044297	cell body	2.64164e-22	3.01042e-17	59	58 (ACTA1)|116 (ADCYAP1)|478 (ATP1A3)|773 (CACNA1A)|774 (CACNA1B)|793 (CALB1)|885 (CCK)|1261 (CNGA3)|1392 (CRH)|1393 (CRHBP)|1813 (DRD2)|2048 (EPHB2)|2781 (GNAZ)|2796 (GNRH1)|3208 (HPCA)|3623 (INHA)|3747 (KCNC2)|3756 (KCNH1)|3800 (KIF5C)|3897 (L1CAM)|4345 (CD200)|4923 (NTSR1)|4986 (OPRK1)|4988 (OPRM1)|5136 (PDE1A)|5179 (PENK)|5274 (SERPINI1)|6014 (RIT2)|6456 (SH3GL2)|6750 (SST)|6860 (SYT4)|6861 (…
	N	GO|GO.BP	GO:0006836	neurotransmitter transport	2.68851e-22	3.06382e-17	42	107 (ADCY1)|116 (ADCYAP1)|774 (CACNA1B)|1141 (CHRNB2)|1268 (CNR1)|1392 (CRH)|1813 (DRD2)|3350 (HTR1A)|4842 (NOS1)|4923 (NTSR1)|5864 (RAB3A)|5865 (RAB3B)|5999 (RGS4)|6534 (SLC6A7)|6616 (SNAP25)|6812 (STXBP1)|6853 (SYN1)|6855 (SYP)|6857 (SYT1)|6860 (SYT4)|6861 (SYT5)|7223 (TRPC4)|8224 (SYN3)|8447 (DOC2B)|8448 (DOC2A)|9899 (SV2B)|10814 (CPLX2)|10815 (CPLX1)|22987 (SV2C)|23025 (UNC13A)|26059 (ERC2)|5…
	N	GO|GO.BP	GO:0032990	cell part morphogenesis	7.18646e-22	8.18969e-17	64	107 (ADCY1)|885 (CCK)|1141 (CHRNB2)|1400 (CRMP1)|1749 (DLX5)|1813 (DRD2)|1944 (EFNA3)|1946 (EFNA5)|1951 (CELSR3)|2046 (EPHA8)|2048 (EPHB2)|2596 (GAP43)|2817 (GPC1)|3800 (KIF5C)|3897 (L1CAM)|3925 (STMN1)|4744 (NEFH)|4804 (NGFR)|5063 (PAK3)|5864 (RAB3A)|6092 (ROBO2)|6456 (SH3GL2)|6585 (SLIT1)|6812 (STXBP1)|6857 (SYT1)|6860 (SYT4)|7070 (THY1)|7224 (TRPC5)|7345 (UCHL1)|8851 (CDK5R1)|9211 (LGI1)|9253 …
	N	GO|GO.CC	GO:0005886	plasma membrane	7.37242e-22	8.40162e-17	231	107 (ADCY1)|284 (ANGPT1)|367 (AR)|398 (ARHGDIG)|432 (ASGR1)|478 (ATP1A3)|773 (CACNA1A)|774 (CACNA1B)|781 (CACNA2D1)|794 (CALB2)|956 (ENTPD3)|1005 (CDH7)|1006 (CDH8)|1010 (CDH12)|1131 (CHRM3)|1141 (CHRNB2)|1261 (CNGA3)|1268 (CNR1)|1292 (COL6A2)|1395 (CRHR2)|1608 (DGKG)|1612 (DAPK1)|1627 (DBN1)|1759 (DNM1)|1813 (DRD2)|1816 (DRD5)|1832 (DSP)|1944 (EFNA3)|1946 (EFNA5)|1951 (CELSR3)|2042 (EPHA3)|2046 …
	N	GO|GO.BP	GO:0048468	cell development	1.49433e-21	1.70294e-16	123	58 (ACTA1)|107 (ADCY1)|116 (ADCYAP1)|367 (AR)|885 (CCK)|1141 (CHRNB2)|1268 (CNR1)|1292 (COL6A2)|1400 (CRMP1)|1608 (DGKG)|1627 (DBN1)|1641 (DCX)|1690 (COCH)|1745 (DLX1)|1749 (DLX5)|1813 (DRD2)|1944 (EFNA3)|1946 (EFNA5)|1951 (CELSR3)|2042 (EPHA3)|2046 (EPHA8)|2048 (EPHB2)|2281 (FKBP1B)|2596 (GAP43)|2796 (GNRH1)|2817 (GPC1)|3084 (NRG1)|3623 (INHA)|3800 (KIF5C)|3880 (KRT19)|3897 (L1CAM)|3925 (STMN1)|…
	N	GO|GO.CC	GO:0150034	distal axon	1.51702e-21	1.7288e-16	42	116 (ADCYAP1)|793 (CALB1)|885 (CCK)|1006 (CDH8)|1131 (CHRM3)|1268 (CNR1)|1393 (CRHBP)|1395 (CRHR2)|1627 (DBN1)|1813 (DRD2)|2571 (GAD1)|2596 (GAP43)|2796 (GNRH1)|3747 (KCNC2)|3800 (KIF5C)|3897 (L1CAM)|4842 (NOS1)|4923 (NTSR1)|4986 (OPRK1)|5179 (PENK)|5864 (RAB3A)|6616 (SNAP25)|6855 (SYP)|7070 (THY1)|7224 (TRPC5)|7786 (MAP3K12)|8851 (CDK5R1)|10409 (BASP1)|10439 (OLFM1)|10814 (CPLX2)|10815 (CPLX1)|1…
	N	GO|GO.CC	GO:0071944	cell periphery	1.86523e-21	2.12562e-16	233	107 (ADCY1)|284 (ANGPT1)|367 (AR)|398 (ARHGDIG)|432 (ASGR1)|478 (ATP1A3)|773 (CACNA1A)|774 (CACNA1B)|781 (CACNA2D1)|794 (CALB2)|956 (ENTPD3)|1005 (CDH7)|1006 (CDH8)|1010 (CDH12)|1131 (CHRM3)|1141 (CHRNB2)|1261 (CNGA3)|1268 (CNR1)|1292 (COL6A2)|1395 (CRHR2)|1608 (DGKG)|1612 (DAPK1)|1627 (DBN1)|1759 (DNM1)|1813 (DRD2)|1816 (DRD5)|1832 (DSP)|1944 (EFNA3)|1946 (EFNA5)|1951 (CELSR3)|2042 (EPHA3)|2046 …
	N	GO|GO.CC	GO:0097447	dendritic tree	2.03214e-21	2.31582e-16	61	774 (CACNA1B)|793 (CALB1)|794 (CALB2)|885 (CCK)|1131 (CHRM3)|1261 (CNGA3)|1393 (CRHBP)|1395 (CRHR2)|1627 (DBN1)|1759 (DNM1)|1813 (DRD2)|2048 (EPHB2)|2566 (GABRG2)|2781 (GNAZ)|2796 (GNRH1)|2912 (GRM2)|3208 (HPCA)|3350 (HTR1A)|3747 (KCNC2)|3756 (KCNH1)|3800 (KIF5C)|3897 (L1CAM)|4842 (NOS1)|4923 (NTSR1)|4986 (OPRK1)|4988 (OPRM1)|5179 (PENK)|5599 (MAPK8)|6014 (RIT2)|6456 (SH3GL2)|6853 (SYN1)|6860 (SY…
	N	GO|GO.CC	GO:0044459	plasma membrane part	2.73532e-21	3.11717e-16	148	107 (ADCY1)|432 (ASGR1)|478 (ATP1A3)|773 (CACNA1A)|774 (CACNA1B)|781 (CACNA2D1)|794 (CALB2)|1005 (CDH7)|1006 (CDH8)|1010 (CDH12)|1131 (CHRM3)|1141 (CHRNB2)|1268 (CNR1)|1395 (CRHR2)|1627 (DBN1)|1759 (DNM1)|1813 (DRD2)|1816 (DRD5)|1832 (DSP)|1944 (EFNA3)|1946 (EFNA5)|2042 (EPHA3)|2046 (EPHA8)|2048 (EPHB2)|2566 (GABRG2)|2572 (GAD2)|2587 (GALR1)|2596 (GAP43)|2742 (GLRA2)|2781 (GNAZ)|2817 (GPC1)|2834 …
	N	GO|GO.CC	GO:0030425	dendrite	8.67024e-21	9.88061e-16	60	774 (CACNA1B)|793 (CALB1)|794 (CALB2)|885 (CCK)|1131 (CHRM3)|1261 (CNGA3)|1393 (CRHBP)|1395 (CRHR2)|1627 (DBN1)|1759 (DNM1)|1813 (DRD2)|2048 (EPHB2)|2566 (GABRG2)|2781 (GNAZ)|2796 (GNRH1)|2912 (GRM2)|3208 (HPCA)|3350 (HTR1A)|3747 (KCNC2)|3756 (KCNH1)|3800 (KIF5C)|3897 (L1CAM)|4842 (NOS1)|4923 (NTSR1)|4986 (OPRK1)|4988 (OPRM1)|5179 (PENK)|5599 (MAPK8)|6456 (SH3GL2)|6853 (SYN1)|6860 (SYT4)|7070 (TH…
	N	GO|GO.BP	GO:0099504	synaptic vesicle cycle	9.62148e-21	1.09646e-15	35	107 (ADCY1)|1141 (CHRNB2)|1268 (CNR1)|1759 (DNM1)|1813 (DRD2)|5575 (PRKAR1B)|5864 (RAB3A)|5865 (RAB3B)|6456 (SH3GL2)|6616 (SNAP25)|6620 (SNCB)|6812 (STXBP1)|6853 (SYN1)|6855 (SYP)|6857 (SYT1)|6860 (SYT4)|6861 (SYT5)|8224 (SYN3)|8447 (DOC2B)|8448 (DOC2A)|8851 (CDK5R1)|8927 (BSN)|9829 (DNAJC6)|10814 (CPLX2)|10815 (CPLX1)|23025 (UNC13A)|26059 (ERC2)|29993 (PACSIN1)|51760 (SYT17)|57586 (SYT13)|63908 …
	N	GO|GO.CC	GO:0044463	cell projection part	1.207e-20	1.37549e-15	96	116 (ADCYAP1)|774 (CACNA1B)|793 (CALB1)|794 (CALB2)|885 (CCK)|1006 (CDH8)|1131 (CHRM3)|1261 (CNGA3)|1268 (CNR1)|1392 (CRH)|1393 (CRHBP)|1395 (CRHR2)|1627 (DBN1)|1641 (DCX)|1759 (DNM1)|1813 (DRD2)|1816 (DRD5)|2048 (EPHB2)|2566 (GABRG2)|2571 (GAD1)|2596 (GAP43)|2781 (GNAZ)|2796 (GNRH1)|2912 (GRM2)|3208 (HPCA)|3350 (HTR1A)|3623 (INHA)|3747 (KCNC2)|3756 (KCNH1)|3800 (KIF5C)|3897 (L1CAM)|4842 (NOS1)|4…
	N	GO|GO.CC	GO:0120038	plasma membrane bounded cell projection part	1.207e-20	1.37549e-15	96	116 (ADCYAP1)|774 (CACNA1B)|793 (CALB1)|794 (CALB2)|885 (CCK)|1006 (CDH8)|1131 (CHRM3)|1261 (CNGA3)|1268 (CNR1)|1392 (CRH)|1393 (CRHBP)|1395 (CRHR2)|1627 (DBN1)|1641 (DCX)|1759 (DNM1)|1813 (DRD2)|1816 (DRD5)|2048 (EPHB2)|2566 (GABRG2)|2571 (GAD1)|2596 (GAP43)|2781 (GNAZ)|2796 (GNRH1)|2912 (GRM2)|3208 (HPCA)|3350 (HTR1A)|3623 (INHA)|3747 (KCNC2)|3756 (KCNH1)|3800 (KIF5C)|3897 (L1CAM)|4842 (NOS1)|4…
	N	GO|GO.CC	GO:0070382	exocytic vesicle	1.36291e-20	1.55317e-15	35	1759 (DNM1)|1813 (DRD2)|2572 (GAD2)|2903 (GRIN2A)|4986 (OPRK1)|5179 (PENK)|5864 (RAB3A)|5865 (RAB3B)|6456 (SH3GL2)|6616 (SNAP25)|6833 (ABCC8)|6853 (SYN1)|6855 (SYP)|6857 (SYT1)|6860 (SYT4)|6861 (SYT5)|8224 (SYN3)|8448 (DOC2A)|8927 (BSN)|9143 (SYNGR3)|9899 (SV2B)|22987 (SV2C)|23025 (UNC13A)|51760 (SYT17)|55530 (SVOP)|57586 (SYT13)|79772 (MCTP1)|84258 (SYT3)|84958 (SYTL1)|112476 (PRRT2)|115827 (RAB…
	N	GO|GO.BP	GO:0007154	cell communication	2.42751e-20	2.76639e-15	254	107 (ADCY1)|116 (ADCYAP1)|284 (ANGPT1)|367 (AR)|398 (ARHGDIG)|432 (ASGR1)|478 (ATP1A3)|534 (ATP6V1G2)|773 (CACNA1A)|774 (CACNA1B)|781 (CACNA2D1)|793 (CALB1)|794 (CALB2)|885 (CCK)|1006 (CDH8)|1114 (CHGB)|1131 (CHRM3)|1141 (CHRNB2)|1149 (CIDEA)|1261 (CNGA3)|1268 (CNR1)|1381 (CRABP1)|1392 (CRH)|1393 (CRHBP)|1395 (CRHR2)|1608 (DGKG)|1612 (DAPK1)|1627 (DBN1)|1641 (DCX)|1745 (DLX1)|1749 (DLX5)|1759 (DN…
	N	GO|GO.BP	GO:0050804	modulation of chemical synaptic transmission	3.1927e-20	3.6384e-15	49	107 (ADCY1)|116 (ADCYAP1)|793 (CALB1)|794 (CALB2)|1141 (CHRNB2)|1268 (CNR1)|1392 (CRH)|1395 (CRHR2)|1627 (DBN1)|1759 (DNM1)|1813 (DRD2)|1816 (DRD5)|2048 (EPHB2)|2903 (GRIN2A)|2904 (GRIN2B)|2906 (GRIN2D)|2912 (GRM2)|4887 (NPY2R)|4923 (NTSR1)|5575 (PRKAR1B)|5581 (PRKCE)|5864 (RAB3A)|5865 (RAB3B)|5999 (RGS4)|6616 (SNAP25)|6812 (STXBP1)|6853 (SYN1)|6855 (SYP)|6857 (SYT1)|6860 (SYT4)|7532 (YWHAG)|8224…
	N	GO|GO.BP	GO:0099177	regulation of trans-synaptic signaling	3.53769e-20	4.03155e-15	49	107 (ADCY1)|116 (ADCYAP1)|793 (CALB1)|794 (CALB2)|1141 (CHRNB2)|1268 (CNR1)|1392 (CRH)|1395 (CRHR2)|1627 (DBN1)|1759 (DNM1)|1813 (DRD2)|1816 (DRD5)|2048 (EPHB2)|2903 (GRIN2A)|2904 (GRIN2B)|2906 (GRIN2D)|2912 (GRM2)|4887 (NPY2R)|4923 (NTSR1)|5575 (PRKAR1B)|5581 (PRKCE)|5864 (RAB3A)|5865 (RAB3B)|5999 (RGS4)|6616 (SNAP25)|6812 (STXBP1)|6853 (SYN1)|6855 (SYP)|6857 (SYT1)|6860 (SYT4)|7532 (YWHAG)|8224…
	N	GO|GO.BP	GO:0048731	system development	5.43118e-20	6.18937e-15	205	58 (ACTA1)|107 (ADCY1)|116 (ADCYAP1)|284 (ANGPT1)|367 (AR)|793 (CALB1)|885 (CCK)|1131 (CHRM3)|1141 (CHRNB2)|1268 (CNR1)|1292 (COL6A2)|1310 (COL19A1)|1392 (CRH)|1400 (CRMP1)|1608 (DGKG)|1627 (DBN1)|1641 (DCX)|1690 (COCH)|1745 (DLX1)|1749 (DLX5)|1813 (DRD2)|1832 (DSP)|1944 (EFNA3)|1946 (EFNA5)|1951 (CELSR3)|2042 (EPHA3)|2046 (EPHA8)|2048 (EPHB2)|2254 (FGF9)|2281 (FKBP1B)|2334 (AFF2)|2596 (GAP43)|26…
	N	GO|GO.BP	GO:0051960	regulation of nervous system development	5.52073e-20	6.29143e-15	72	116 (ADCYAP1)|1141 (CHRNB2)|1268 (CNR1)|1400 (CRMP1)|1627 (DBN1)|1745 (DLX1)|1813 (DRD2)|1946 (EFNA5)|2042 (EPHA3)|2048 (EPHB2)|2281 (FKBP1B)|2596 (GAP43)|2796 (GNRH1)|3084 (NRG1)|3897 (L1CAM)|4674 (NAP1L2)|4804 (NGFR)|4842 (NOS1)|4988 (OPRM1)|5063 (PAK3)|5121 (PCP4)|5274 (SERPINI1)|6014 (RIT2)|6092 (ROBO2)|6585 (SLIT1)|6616 (SNAP25)|6664 (SOX11)|6833 (ABCC8)|6857 (SYT1)|6860 (SYT4)|7070 (THY1)|7…
	N	GO|GO.CC	GO:0030672	synaptic vesicle membrane	9.41598e-20	1.07305e-14	26	1813 (DRD2)|2572 (GAD2)|4986 (OPRK1)|5864 (RAB3A)|5865 (RAB3B)|6456 (SH3GL2)|6833 (ABCC8)|6853 (SYN1)|6855 (SYP)|6857 (SYT1)|6860 (SYT4)|6861 (SYT5)|8224 (SYN3)|8448 (DOC2A)|9143 (SYNGR3)|9899 (SV2B)|22987 (SV2C)|23025 (UNC13A)|55530 (SVOP)|79772 (MCTP1)|112476 (PRRT2)|115827 (RAB3C)|132204 (SYNPR)|140679 (SLC32A1)|148281 (SYT6)|388662 (SLC6A17)
	N	GO|GO.CC	GO:0099501	exocytic vesicle membrane	9.41598e-20	1.07305e-14	26	1813 (DRD2)|2572 (GAD2)|4986 (OPRK1)|5864 (RAB3A)|5865 (RAB3B)|6456 (SH3GL2)|6833 (ABCC8)|6853 (SYN1)|6855 (SYP)|6857 (SYT1)|6860 (SYT4)|6861 (SYT5)|8224 (SYN3)|8448 (DOC2A)|9143 (SYNGR3)|9899 (SV2B)|22987 (SV2C)|23025 (UNC13A)|55530 (SVOP)|79772 (MCTP1)|112476 (PRRT2)|115827 (RAB3C)|132204 (SYNPR)|140679 (SLC32A1)|148281 (SYT6)|388662 (SLC6A17)
	N	GO|GO.BP	GO:0023061	signal release	1.76023e-19	2.00596e-14	50	107 (ADCY1)|116 (ADCYAP1)|773 (CACNA1A)|774 (CACNA1B)|1141 (CHRNB2)|1268 (CNR1)|1392 (CRH)|1393 (CRHBP)|1813 (DRD2)|1946 (EFNA5)|2281 (FKBP1B)|2587 (GALR1)|2696 (GIPR)|3350 (HTR1A)|3623 (INHA)|3747 (KCNC2)|4986 (OPRK1)|4988 (OPRM1)|5581 (PRKCE)|5864 (RAB3A)|6616 (SNAP25)|6664 (SOX11)|6812 (STXBP1)|6833 (ABCC8)|6853 (SYN1)|6855 (SYP)|6857 (SYT1)|6860 (SYT4)|6861 (SYT5)|7425 (VGF)|7432 (VIP)|7447 (…
	N	GO|GO.BP	GO:0007275	multicellular organism development	2.09784e-19	2.3907e-14	219	58 (ACTA1)|107 (ADCY1)|116 (ADCYAP1)|284 (ANGPT1)|367 (AR)|793 (CALB1)|885 (CCK)|1131 (CHRM3)|1141 (CHRNB2)|1268 (CNR1)|1292 (COL6A2)|1310 (COL19A1)|1381 (CRABP1)|1392 (CRH)|1400 (CRMP1)|1608 (DGKG)|1627 (DBN1)|1641 (DCX)|1690 (COCH)|1745 (DLX1)|1749 (DLX5)|1813 (DRD2)|1832 (DSP)|1944 (EFNA3)|1946 (EFNA5)|1951 (CELSR3)|2042 (EPHA3)|2046 (EPHA8)|2048 (EPHB2)|2139 (EYA2)|2254 (FGF9)|2281 (FKBP1B)|2…
	N	GO|GO.BP	GO:0023052	signaling	5.73005e-19	6.52997e-14	249	107 (ADCY1)|116 (ADCYAP1)|284 (ANGPT1)|367 (AR)|398 (ARHGDIG)|478 (ATP1A3)|534 (ATP6V1G2)|773 (CACNA1A)|774 (CACNA1B)|781 (CACNA2D1)|793 (CALB1)|794 (CALB2)|885 (CCK)|1006 (CDH8)|1114 (CHGB)|1131 (CHRM3)|1141 (CHRNB2)|1149 (CIDEA)|1261 (CNGA3)|1268 (CNR1)|1381 (CRABP1)|1392 (CRH)|1393 (CRHBP)|1395 (CRHR2)|1608 (DGKG)|1612 (DAPK1)|1627 (DBN1)|1641 (DCX)|1745 (DLX1)|1749 (DLX5)|1759 (DNM1)|1813 (DR…
	N	GO|GO.BP	GO:0061564	axon development	1.25221e-18	1.42702e-13	51	107 (ADCY1)|885 (CCK)|1141 (CHRNB2)|1268 (CNR1)|1400 (CRMP1)|1749 (DLX5)|1813 (DRD2)|1944 (EFNA3)|1946 (EFNA5)|1951 (CELSR3)|2042 (EPHA3)|2046 (EPHA8)|2048 (EPHB2)|2281 (FKBP1B)|2596 (GAP43)|2817 (GPC1)|3800 (KIF5C)|3897 (L1CAM)|3925 (STMN1)|4744 (NEFH)|4804 (NGFR)|5063 (PAK3)|5864 (RAB3A)|6092 (ROBO2)|6585 (SLIT1)|6812 (STXBP1)|7070 (THY1)|7224 (TRPC5)|7345 (UCHL1)|8851 (CDK5R1)|9211 (LGI1)|9253…
	N	GO|GO.CC	GO:0031226	intrinsic component of plasma membrane	1.56742e-18	1.78623e-13	102	107 (ADCY1)|432 (ASGR1)|478 (ATP1A3)|1131 (CHRM3)|1141 (CHRNB2)|1268 (CNR1)|1395 (CRHR2)|1813 (DRD2)|1816 (DRD5)|1944 (EFNA3)|1946 (EFNA5)|2042 (EPHA3)|2046 (EPHA8)|2048 (EPHB2)|2566 (GABRG2)|2587 (GALR1)|2742 (GLRA2)|2817 (GPC1)|2834 (PRLHR)|2835 (GPR12)|2845 (GPR22)|2903 (GRIN2A)|2904 (GRIN2B)|2906 (GRIN2D)|2912 (GRM2)|3038 (HAS3)|3084 (NRG1)|3350 (HTR1A)|3645 (INSRR)|3747 (KCNC2)|3756 (KCNH1)|…
	N	GO|GO.BP	GO:0050767	regulation of neurogenesis	1.65247e-18	1.88316e-13	65	116 (ADCYAP1)|1141 (CHRNB2)|1268 (CNR1)|1400 (CRMP1)|1627 (DBN1)|1745 (DLX1)|1813 (DRD2)|1946 (EFNA5)|2042 (EPHA3)|2048 (EPHB2)|2281 (FKBP1B)|2796 (GNRH1)|3084 (NRG1)|3897 (L1CAM)|4674 (NAP1L2)|4804 (NGFR)|4842 (NOS1)|4988 (OPRM1)|5063 (PAK3)|5121 (PCP4)|5274 (SERPINI1)|6014 (RIT2)|6092 (ROBO2)|6616 (SNAP25)|6664 (SOX11)|6833 (ABCC8)|6857 (SYT1)|6860 (SYT4)|7070 (THY1)|7161 (TP73)|7224 (TRPC5)|75…
	N	GO|GO.BP	GO:0099003	vesicle-mediated transport in synapse	4.01781e-18	4.57869e-13	33	107 (ADCY1)|1141 (CHRNB2)|1268 (CNR1)|1759 (DNM1)|1813 (DRD2)|3208 (HPCA)|3800 (KIF5C)|5864 (RAB3A)|6456 (SH3GL2)|6616 (SNAP25)|6620 (SNCB)|6812 (STXBP1)|6853 (SYN1)|6855 (SYP)|6857 (SYT1)|6860 (SYT4)|6861 (SYT5)|8447 (DOC2B)|8448 (DOC2A)|9829 (DNAJC6)|10814 (CPLX2)|10815 (CPLX1)|23025 (UNC13A)|26059 (ERC2)|27065 (NSG1)|29993 (PACSIN1)|51760 (SYT17)|57586 (SYT13)|63908 (NAPB)|80128 (TRIM46)|84258…
	N	GO|GO.CC	GO:0008021	synaptic vesicle	5.72881e-18	6.52856e-13	31	1759 (DNM1)|1813 (DRD2)|2572 (GAD2)|2903 (GRIN2A)|4986 (OPRK1)|5179 (PENK)|5864 (RAB3A)|5865 (RAB3B)|6456 (SH3GL2)|6616 (SNAP25)|6833 (ABCC8)|6853 (SYN1)|6855 (SYP)|6857 (SYT1)|6860 (SYT4)|6861 (SYT5)|8224 (SYN3)|8448 (DOC2A)|8927 (BSN)|9143 (SYNGR3)|9899 (SV2B)|22987 (SV2C)|23025 (UNC13A)|55530 (SVOP)|79772 (MCTP1)|112476 (PRRT2)|115827 (RAB3C)|132204 (SYNPR)|140679 (SLC32A1)|148281 (SYT6)|38866…
	N	GO|GO.BP	GO:0048667	cell morphogenesis involved in neuron differentiation	1.17795e-17	1.34239e-12	53	107 (ADCY1)|885 (CCK)|1141 (CHRNB2)|1400 (CRMP1)|1749 (DLX5)|1813 (DRD2)|1944 (EFNA3)|1946 (EFNA5)|1951 (CELSR3)|2046 (EPHA8)|2048 (EPHB2)|2596 (GAP43)|2817 (GPC1)|3800 (KIF5C)|3897 (L1CAM)|3925 (STMN1)|4744 (NEFH)|4804 (NGFR)|5063 (PAK3)|5864 (RAB3A)|6092 (ROBO2)|6585 (SLIT1)|6812 (STXBP1)|7070 (THY1)|7224 (TRPC5)|7345 (UCHL1)|8851 (CDK5R1)|9211 (LGI1)|9253 (NUMBL)|9369 (NRXN3)|9912 (ARHGAP44)|1…
	N	GO|GO.BP	GO:0007409	axonogenesis	1.91723e-17	2.18487e-12	47	107 (ADCY1)|885 (CCK)|1141 (CHRNB2)|1400 (CRMP1)|1749 (DLX5)|1813 (DRD2)|1944 (EFNA3)|1946 (EFNA5)|1951 (CELSR3)|2046 (EPHA8)|2048 (EPHB2)|2596 (GAP43)|2817 (GPC1)|3800 (KIF5C)|3897 (L1CAM)|3925 (STMN1)|4744 (NEFH)|4804 (NGFR)|5063 (PAK3)|5864 (RAB3A)|6092 (ROBO2)|6585 (SLIT1)|6812 (STXBP1)|7070 (THY1)|7224 (TRPC5)|7345 (UCHL1)|8851 (CDK5R1)|9211 (LGI1)|9253 (NUMBL)|9369 (NRXN3)|10371 (SEMA3A)|10…
	N	GO|GO.CC	GO:0097060	synaptic membrane	2.01311e-17	2.29414e-12	46	107 (ADCY1)|794 (CALB2)|1006 (CDH8)|1131 (CHRM3)|1141 (CHRNB2)|1268 (CNR1)|1627 (DBN1)|1759 (DNM1)|1813 (DRD2)|2048 (EPHB2)|2566 (GABRG2)|2572 (GAD2)|2742 (GLRA2)|2903 (GRIN2A)|2904 (GRIN2B)|2906 (GRIN2D)|2912 (GRM2)|3747 (KCNC2)|3756 (KCNH1)|4986 (OPRK1)|4988 (OPRM1)|6616 (SNAP25)|6812 (STXBP1)|6855 (SYP)|6857 (SYT1)|7442 (TRPV1)|8001 (GLRA3)|9177 (HTR3B)|9228 (DLGAP2)|10368 (CACNG3)|10369 (CACN…
	N	GO|GO.CC	GO:0044306	neuron projection terminus	2.8137e-17	3.20649e-12	27	116 (ADCYAP1)|793 (CALB1)|885 (CCK)|1006 (CDH8)|1131 (CHRM3)|1393 (CRHBP)|1395 (CRHR2)|1813 (DRD2)|2571 (GAD1)|2796 (GNRH1)|3747 (KCNC2)|4842 (NOS1)|4923 (NTSR1)|4986 (OPRK1)|5179 (PENK)|5864 (RAB3A)|6855 (SYP)|6857 (SYT1)|6860 (SYT4)|7345 (UCHL1)|8927 (BSN)|10814 (CPLX2)|10815 (CPLX1)|23025 (UNC13A)|29993 (PACSIN1)|112476 (PRRT2)|140679 (SLC32A1)
	N	GO|GO.BP	GO:0051049	regulation of transport	5.55737e-17	6.33317e-12	103	107 (ADCY1)|116 (ADCYAP1)|284 (ANGPT1)|773 (CACNA1A)|774 (CACNA1B)|781 (CACNA2D1)|885 (CCK)|1141 (CHRNB2)|1149 (CIDEA)|1268 (CNR1)|1392 (CRH)|1393 (CRHBP)|1612 (DAPK1)|1759 (DNM1)|1813 (DRD2)|1946 (EFNA5)|2042 (EPHA3)|2048 (EPHB2)|2281 (FKBP1B)|2587 (GALR1)|2696 (GIPR)|3084 (NRG1)|3208 (HPCA)|3350 (HTR1A)|3623 (INHA)|3747 (KCNC2)|3756 (KCNH1)|3762 (KCNJ5)|3788 (KCNS2)|4345 (CD200)|4744 (NEFH)|484…
	N	GO|GO.BP	GO:0000902	cell morphogenesis	6.2272e-17	7.09652e-12	71	107 (ADCY1)|367 (AR)|885 (CCK)|1141 (CHRNB2)|1292 (COL6A2)|1400 (CRMP1)|1690 (COCH)|1749 (DLX5)|1813 (DRD2)|1944 (EFNA3)|1946 (EFNA5)|1951 (CELSR3)|2046 (EPHA8)|2048 (EPHB2)|2596 (GAP43)|2817 (GPC1)|3084 (NRG1)|3800 (KIF5C)|3897 (L1CAM)|3925 (STMN1)|4233 (MET)|4744 (NEFH)|4804 (NGFR)|5063 (PAK3)|5864 (RAB3A)|6092 (ROBO2)|6456 (SH3GL2)|6585 (SLIT1)|6812 (STXBP1)|6857 (SYT1)|6860 (SYT4)|7070 (THY1)…
	N	GO|GO.BP	GO:0060284	regulation of cell development	6.40078e-17	7.29432e-12	68	116 (ADCYAP1)|1141 (CHRNB2)|1268 (CNR1)|1400 (CRMP1)|1627 (DBN1)|1745 (DLX1)|1813 (DRD2)|1946 (EFNA5)|2042 (EPHA3)|2048 (EPHB2)|2281 (FKBP1B)|2796 (GNRH1)|3084 (NRG1)|3897 (L1CAM)|4674 (NAP1L2)|4804 (NGFR)|4842 (NOS1)|4880 (NPPC)|4988 (OPRM1)|5063 (PAK3)|5121 (PCP4)|5274 (SERPINI1)|5999 (RGS4)|6014 (RIT2)|6092 (ROBO2)|6616 (SNAP25)|6664 (SOX11)|6833 (ABCC8)|6857 (SYT1)|6860 (SYT4)|7070 (THY1)|716…
	N	GO|GO.BP	GO:0006812	cation transport	7.17114e-17	8.17223e-12	77	116 (ADCYAP1)|478 (ATP1A3)|534 (ATP6V1G2)|773 (CACNA1A)|774 (CACNA1B)|781 (CACNA2D1)|1141 (CHRNB2)|1261 (CNGA3)|1268 (CNR1)|1392 (CRH)|1393 (CRHBP)|1612 (DAPK1)|1813 (DRD2)|2048 (EPHB2)|2281 (FKBP1B)|2903 (GRIN2A)|2904 (GRIN2B)|2906 (GRIN2D)|3208 (HPCA)|3350 (HTR1A)|3747 (KCNC2)|3756 (KCNH1)|3762 (KCNJ5)|3788 (KCNS2)|4842 (NOS1)|4887 (NPY2R)|4923 (NTSR1)|4986 (OPRK1)|4988 (OPRM1)|5581 (PRKCE)|586…
	N	GO|GO.BP	GO:0000904	cell morphogenesis involved in differentiation	8.4827e-17	9.66689e-12	59	107 (ADCY1)|367 (AR)|885 (CCK)|1141 (CHRNB2)|1292 (COL6A2)|1400 (CRMP1)|1690 (COCH)|1749 (DLX5)|1813 (DRD2)|1944 (EFNA3)|1946 (EFNA5)|1951 (CELSR3)|2046 (EPHA8)|2048 (EPHB2)|2596 (GAP43)|2817 (GPC1)|3800 (KIF5C)|3897 (L1CAM)|3925 (STMN1)|4233 (MET)|4744 (NEFH)|4804 (NGFR)|5063 (PAK3)|5864 (RAB3A)|6092 (ROBO2)|6585 (SLIT1)|6812 (STXBP1)|7070 (THY1)|7224 (TRPC5)|7345 (UCHL1)|8851 (CDK5R1)|9211 (LGI…
	N	GO|GO.BP	GO:0065008	regulation of biological quality	1.07139e-16	1.22096e-11	170	107 (ADCY1)|116 (ADCYAP1)|284 (ANGPT1)|367 (AR)|478 (ATP1A3)|773 (CACNA1A)|774 (CACNA1B)|781 (CACNA2D1)|793 (CALB1)|794 (CALB2)|885 (CCK)|1006 (CDH8)|1131 (CHRM3)|1141 (CHRNB2)|1149 (CIDEA)|1268 (CNR1)|1381 (CRABP1)|1392 (CRH)|1393 (CRHBP)|1395 (CRHR2)|1608 (DGKG)|1627 (DBN1)|1690 (COCH)|1759 (DNM1)|1813 (DRD2)|1816 (DRD5)|1832 (DSP)|1946 (EFNA5)|2048 (EPHB2)|2139 (EYA2)|2170 (FABP3)|2281 (FKBP1B…
	N	GO|GO.BP	GO:0045664	regulation of neuron differentiation	1.32152e-16	1.506e-11	55	116 (ADCYAP1)|1141 (CHRNB2)|1268 (CNR1)|1400 (CRMP1)|1627 (DBN1)|1745 (DLX1)|1946 (EFNA5)|2042 (EPHA3)|2048 (EPHB2)|2281 (FKBP1B)|3897 (L1CAM)|4674 (NAP1L2)|4804 (NGFR)|5063 (PAK3)|5121 (PCP4)|5274 (SERPINI1)|6014 (RIT2)|6092 (ROBO2)|6616 (SNAP25)|6664 (SOX11)|6857 (SYT1)|6860 (SYT4)|7070 (THY1)|7161 (TP73)|7224 (TRPC5)|7532 (YWHAG)|8851 (CDK5R1)|9362 (CPNE6)|9856 (KIAA0319)|9912 (ARHGAP44)|10371…
	N	GO|GO.BP	GO:0010975	regulation of neuron projection development	2.25331e-16	2.56787e-11	47	116 (ADCYAP1)|1141 (CHRNB2)|1268 (CNR1)|1400 (CRMP1)|1627 (DBN1)|1946 (EFNA5)|2042 (EPHA3)|2048 (EPHB2)|2281 (FKBP1B)|3897 (L1CAM)|4804 (NGFR)|5063 (PAK3)|5274 (SERPINI1)|6014 (RIT2)|6092 (ROBO2)|6616 (SNAP25)|6857 (SYT1)|6860 (SYT4)|7070 (THY1)|7224 (TRPC5)|8851 (CDK5R1)|9362 (CPNE6)|9856 (KIAA0319)|9912 (ARHGAP44)|10371 (SEMA3A)|10439 (OLFM1)|10716 (TBR1)|11075 (STMN2)|22876 (INPP5F)|22941 (SHA…
	N	GO|GO.CC	GO:0098794	postsynapse	3.49598e-16	3.98402e-11	53	107 (ADCY1)|793 (CALB1)|1131 (CHRM3)|1141 (CHRNB2)|1627 (DBN1)|1759 (DNM1)|1813 (DRD2)|2048 (EPHB2)|2566 (GABRG2)|2596 (GAP43)|2742 (GLRA2)|2903 (GRIN2A)|2904 (GRIN2B)|2906 (GRIN2D)|2912 (GRM2)|3208 (HPCA)|3747 (KCNC2)|3756 (KCNH1)|4744 (NEFH)|4842 (NOS1)|4923 (NTSR1)|4986 (OPRK1)|4988 (OPRM1)|5063 (PAK3)|6616 (SNAP25)|6812 (STXBP1)|6853 (SYN1)|7442 (TRPV1)|8001 (GLRA3)|8224 (SYN3)|8851 (CDK5R1)|…
	N	GO|GO.BP	GO:0097479	synaptic vesicle localization	3.54235e-16	4.03686e-11	28	107 (ADCY1)|1141 (CHRNB2)|1268 (CNR1)|1759 (DNM1)|1813 (DRD2)|3800 (KIF5C)|5864 (RAB3A)|6616 (SNAP25)|6812 (STXBP1)|6853 (SYN1)|6855 (SYP)|6857 (SYT1)|6860 (SYT4)|6861 (SYT5)|8224 (SYN3)|8447 (DOC2B)|8448 (DOC2A)|10814 (CPLX2)|10815 (CPLX1)|23025 (UNC13A)|26059 (ERC2)|51760 (SYT17)|57586 (SYT13)|63908 (NAPB)|80128 (TRIM46)|84258 (SYT3)|112476 (PRRT2)|148281 (SYT6)
	N	GO|GO.MF	GO:0005261	cation channel activity	4.21579e-16	4.80431e-11	38	773 (CACNA1A)|774 (CACNA1B)|781 (CACNA2D1)|1141 (CHRNB2)|1261 (CNGA3)|1268 (CNR1)|2281 (FKBP1B)|2903 (GRIN2A)|2904 (GRIN2B)|2906 (GRIN2D)|3747 (KCNC2)|3756 (KCNH1)|3762 (KCNJ5)|3788 (KCNS2)|4988 (OPRM1)|6331 (SCN5A)|6338 (SCNN1B)|6616 (SNAP25)|6833 (ABCC8)|7223 (TRPC4)|7224 (TRPC5)|7442 (TRPV1)|9177 (HTR3B)|9254 (CACNA2D2)|10021 (HCN4)|10368 (CACNG3)|10369 (CACNG2)|51305 (KCNK9)|55503 (TRPV6)|557…
	N	GO|GO.BP	GO:0007269	neurotransmitter secretion	4.89725e-16	5.58091e-11	28	107 (ADCY1)|774 (CACNA1B)|1141 (CHRNB2)|1268 (CNR1)|1813 (DRD2)|5864 (RAB3A)|6616 (SNAP25)|6812 (STXBP1)|6853 (SYN1)|6855 (SYP)|6857 (SYT1)|6860 (SYT4)|6861 (SYT5)|8224 (SYN3)|8447 (DOC2B)|8448 (DOC2A)|10814 (CPLX2)|10815 (CPLX1)|23025 (UNC13A)|26059 (ERC2)|51760 (SYT17)|57586 (SYT13)|63908 (NAPB)|79772 (MCTP1)|84258 (SYT3)|112476 (PRRT2)|140679 (SLC32A1)|148281 (SYT6)
	N	GO|GO.BP	GO:0099643	signal release from synapse	4.89725e-16	5.58091e-11	28	107 (ADCY1)|774 (CACNA1B)|1141 (CHRNB2)|1268 (CNR1)|1813 (DRD2)|5864 (RAB3A)|6616 (SNAP25)|6812 (STXBP1)|6853 (SYN1)|6855 (SYP)|6857 (SYT1)|6860 (SYT4)|6861 (SYT5)|8224 (SYN3)|8447 (DOC2B)|8448 (DOC2A)|10814 (CPLX2)|10815 (CPLX1)|23025 (UNC13A)|26059 (ERC2)|51760 (SYT17)|57586 (SYT13)|63908 (NAPB)|79772 (MCTP1)|84258 (SYT3)|112476 (PRRT2)|140679 (SLC32A1)|148281 (SYT6)
	N	GO|GO.BP	GO:0048489	synaptic vesicle transport	5.15615e-16	5.87595e-11	27	107 (ADCY1)|1141 (CHRNB2)|1268 (CNR1)|1759 (DNM1)|1813 (DRD2)|3800 (KIF5C)|5864 (RAB3A)|6616 (SNAP25)|6812 (STXBP1)|6853 (SYN1)|6855 (SYP)|6857 (SYT1)|6860 (SYT4)|6861 (SYT5)|8447 (DOC2B)|8448 (DOC2A)|10814 (CPLX2)|10815 (CPLX1)|23025 (UNC13A)|26059 (ERC2)|51760 (SYT17)|57586 (SYT13)|63908 (NAPB)|80128 (TRIM46)|84258 (SYT3)|112476 (PRRT2)|148281 (SYT6)
	N	GO|GO.BP	GO:0097480	establishment of synaptic vesicle localization	5.15615e-16	5.87595e-11	27	107 (ADCY1)|1141 (CHRNB2)|1268 (CNR1)|1759 (DNM1)|1813 (DRD2)|3800 (KIF5C)|5864 (RAB3A)|6616 (SNAP25)|6812 (STXBP1)|6853 (SYN1)|6855 (SYP)|6857 (SYT1)|6860 (SYT4)|6861 (SYT5)|8447 (DOC2B)|8448 (DOC2A)|10814 (CPLX2)|10815 (CPLX1)|23025 (UNC13A)|26059 (ERC2)|51760 (SYT17)|57586 (SYT13)|63908 (NAPB)|80128 (TRIM46)|84258 (SYT3)|112476 (PRRT2)|148281 (SYT6)
	N	GO|GO.BP	GO:0120036	plasma membrane bounded cell projection organization	7.13565e-16	8.13178e-11	88	107 (ADCY1)|116 (ADCYAP1)|478 (ATP1A3)|885 (CCK)|1141 (CHRNB2)|1268 (CNR1)|1400 (CRMP1)|1627 (DBN1)|1641 (DCX)|1749 (DLX5)|1813 (DRD2)|1944 (EFNA3)|1946 (EFNA5)|1951 (CELSR3)|2042 (EPHA3)|2046 (EPHA8)|2048 (EPHB2)|2281 (FKBP1B)|2596 (GAP43)|2817 (GPC1)|2904 (GRIN2B)|3800 (KIF5C)|3897 (L1CAM)|3925 (STMN1)|4744 (NEFH)|4804 (NGFR)|5063 (PAK3)|5274 (SERPINI1)|5864 (RAB3A)|6014 (RIT2)|6092 (ROBO2)|645…
	N	GO|GO.BP	GO:0048856	anatomical structure development	8.18902e-16	9.33221e-11	222	58 (ACTA1)|107 (ADCY1)|116 (ADCYAP1)|284 (ANGPT1)|367 (AR)|793 (CALB1)|885 (CCK)|1131 (CHRM3)|1141 (CHRNB2)|1268 (CNR1)|1292 (COL6A2)|1310 (COL19A1)|1381 (CRABP1)|1392 (CRH)|1400 (CRMP1)|1608 (DGKG)|1627 (DBN1)|1641 (DCX)|1690 (COCH)|1745 (DLX1)|1749 (DLX5)|1813 (DRD2)|1832 (DSP)|1944 (EFNA3)|1946 (EFNA5)|1951 (CELSR3)|2042 (EPHA3)|2046 (EPHA8)|2048 (EPHB2)|2139 (EYA2)|2254 (FGF9)|2281 (FKBP1B)|2…
	N	GO|GO.BP	GO:0032989	cellular component morphogenesis	8.25174e-16	9.40368e-11	73	58 (ACTA1)|107 (ADCY1)|367 (AR)|885 (CCK)|1141 (CHRNB2)|1292 (COL6A2)|1400 (CRMP1)|1690 (COCH)|1749 (DLX5)|1813 (DRD2)|1944 (EFNA3)|1946 (EFNA5)|1951 (CELSR3)|2046 (EPHA8)|2048 (EPHB2)|2596 (GAP43)|2817 (GPC1)|3084 (NRG1)|3800 (KIF5C)|3880 (KRT19)|3897 (L1CAM)|3925 (STMN1)|4233 (MET)|4744 (NEFH)|4804 (NGFR)|5063 (PAK3)|5864 (RAB3A)|6092 (ROBO2)|6456 (SH3GL2)|6585 (SLIT1)|6812 (STXBP1)|6857 (SYT1)…
	N	GO|GO.CC	GO:0005887	integral component of plasma membrane	1.27732e-15	1.45563e-10	93	107 (ADCY1)|432 (ASGR1)|478 (ATP1A3)|1131 (CHRM3)|1141 (CHRNB2)|1268 (CNR1)|1395 (CRHR2)|1813 (DRD2)|1816 (DRD5)|2042 (EPHA3)|2046 (EPHA8)|2048 (EPHB2)|2566 (GABRG2)|2587 (GALR1)|2742 (GLRA2)|2834 (PRLHR)|2835 (GPR12)|2845 (GPR22)|2903 (GRIN2A)|2904 (GRIN2B)|2906 (GRIN2D)|2912 (GRM2)|3038 (HAS3)|3084 (NRG1)|3350 (HTR1A)|3645 (INSRR)|3747 (KCNC2)|3756 (KCNH1)|3762 (KCNJ5)|3788 (KCNS2)|4233 (MET)|4…
	N	GO|GO.BP	GO:0016079	synaptic vesicle exocytosis	1.7945e-15	2.04501e-10	24	107 (ADCY1)|1141 (CHRNB2)|1268 (CNR1)|1813 (DRD2)|5864 (RAB3A)|6616 (SNAP25)|6812 (STXBP1)|6853 (SYN1)|6855 (SYP)|6857 (SYT1)|6860 (SYT4)|6861 (SYT5)|8447 (DOC2B)|8448 (DOC2A)|10814 (CPLX2)|10815 (CPLX1)|23025 (UNC13A)|26059 (ERC2)|51760 (SYT17)|57586 (SYT13)|63908 (NAPB)|84258 (SYT3)|112476 (PRRT2)|148281 (SYT6)
	N	GO|GO.CC	GO:0043204	perikaryon	2.63429e-15	3.00203e-10	24	116 (ADCYAP1)|885 (CCK)|1261 (CNGA3)|1392 (CRH)|1393 (CRHBP)|1813 (DRD2)|2796 (GNRH1)|3208 (HPCA)|3747 (KCNC2)|3756 (KCNH1)|4923 (NTSR1)|4986 (OPRK1)|4988 (OPRM1)|5179 (PENK)|5274 (SERPINI1)|7432 (VIP)|8001 (GLRA3)|9362 (CPNE6)|10439 (OLFM1)|26047 (CNTNAP2)|57699 (CPNE5)|65078 (RTN4R)|85397 (RGS8)|146713 (RBFOX3)
	N	GO|GO.BP	GO:0030030	cell projection organization	2.91662e-15	3.32379e-10	88	107 (ADCY1)|116 (ADCYAP1)|478 (ATP1A3)|885 (CCK)|1141 (CHRNB2)|1268 (CNR1)|1400 (CRMP1)|1627 (DBN1)|1641 (DCX)|1749 (DLX5)|1813 (DRD2)|1944 (EFNA3)|1946 (EFNA5)|1951 (CELSR3)|2042 (EPHA3)|2046 (EPHA8)|2048 (EPHB2)|2281 (FKBP1B)|2596 (GAP43)|2817 (GPC1)|2904 (GRIN2B)|3800 (KIF5C)|3897 (L1CAM)|3925 (STMN1)|4744 (NEFH)|4804 (NGFR)|5063 (PAK3)|5274 (SERPINI1)|5864 (RAB3A)|6014 (RIT2)|6092 (ROBO2)|645…
	N	GO|GO.BP	GO:0043269	regulation of ion transport	3.27752e-15	3.73506e-10	54	116 (ADCYAP1)|773 (CACNA1A)|774 (CACNA1B)|781 (CACNA2D1)|885 (CCK)|1141 (CHRNB2)|1268 (CNR1)|1392 (CRH)|1393 (CRHBP)|1612 (DAPK1)|1813 (DRD2)|2048 (EPHB2)|2281 (FKBP1B)|3208 (HPCA)|3350 (HTR1A)|3747 (KCNC2)|3756 (KCNH1)|3762 (KCNJ5)|3788 (KCNS2)|4842 (NOS1)|4887 (NPY2R)|4923 (NTSR1)|4986 (OPRK1)|4988 (OPRM1)|5581 (PRKCE)|5865 (RAB3B)|5999 (RGS4)|6331 (SCN5A)|6812 (STXBP1)|6833 (ABCC8)|6857 (SYT1)…
	N	GO|GO.CC	GO:1902495	transmembrane transporter complex	4.0629e-15	4.63008e-10	37	478 (ATP1A3)|773 (CACNA1A)|774 (CACNA1B)|781 (CACNA2D1)|1141 (CHRNB2)|1261 (CNGA3)|2281 (FKBP1B)|2566 (GABRG2)|2742 (GLRA2)|2903 (GRIN2A)|2904 (GRIN2B)|2906 (GRIN2D)|3747 (KCNC2)|3756 (KCNH1)|3762 (KCNJ5)|3788 (KCNS2)|4842 (NOS1)|6331 (SCN5A)|6338 (SCNN1B)|6616 (SNAP25)|6833 (ABCC8)|7223 (TRPC4)|7224 (TRPC5)|8001 (GLRA3)|9177 (HTR3B)|9254 (CACNA2D2)|10021 (HCN4)|10368 (CACNG3)|10369 (CACNG2)|2294…
	N	GO|GO.BP	GO:0032502	developmental process	6.61117e-15	7.53409e-10	230	58 (ACTA1)|107 (ADCY1)|116 (ADCYAP1)|284 (ANGPT1)|367 (AR)|793 (CALB1)|862 (RUNX1T1)|885 (CCK)|1131 (CHRM3)|1141 (CHRNB2)|1268 (CNR1)|1292 (COL6A2)|1310 (COL19A1)|1381 (CRABP1)|1392 (CRH)|1400 (CRMP1)|1608 (DGKG)|1627 (DBN1)|1641 (DCX)|1690 (COCH)|1745 (DLX1)|1749 (DLX5)|1813 (DRD2)|1832 (DSP)|1944 (EFNA3)|1946 (EFNA5)|1951 (CELSR3)|2042 (EPHA3)|2046 (EPHA8)|2048 (EPHB2)|2139 (EYA2)|2254 (FGF9)|2…
	N	GO|GO.CC	GO:0098978	glutamatergic synapse	8.03222e-15	9.15351e-10	38	107 (ADCY1)|793 (CALB1)|1006 (CDH8)|1131 (CHRM3)|1268 (CNR1)|1627 (DBN1)|1759 (DNM1)|1813 (DRD2)|2048 (EPHB2)|2903 (GRIN2A)|3084 (NRG1)|3208 (HPCA)|5063 (PAK3)|5575 (PRKAR1B)|6456 (SH3GL2)|6616 (SNAP25)|6812 (STXBP1)|6857 (SYT1)|6860 (SYT4)|8224 (SYN3)|8927 (BSN)|9211 (LGI1)|9758 (FRMPD4)|9912 (ARHGAP44)|10368 (CACNG3)|10369 (CACNG2)|10814 (CPLX2)|10815 (CPLX1)|23025 (UNC13A)|23467 (NPTXR)|26059 …
	N	GO|GO.BP	GO:0010646	regulation of cell communication	8.04736e-15	9.17077e-10	154	107 (ADCY1)|116 (ADCYAP1)|284 (ANGPT1)|367 (AR)|398 (ARHGDIG)|773 (CACNA1A)|793 (CALB1)|794 (CALB2)|885 (CCK)|1114 (CHGB)|1141 (CHRNB2)|1149 (CIDEA)|1268 (CNR1)|1392 (CRH)|1393 (CRHBP)|1395 (CRHR2)|1612 (DAPK1)|1627 (DBN1)|1745 (DLX1)|1749 (DLX5)|1759 (DNM1)|1813 (DRD2)|1816 (DRD5)|1946 (EFNA5)|2042 (EPHA3)|2046 (EPHA8)|2048 (EPHB2)|2139 (EYA2)|2254 (FGF9)|2281 (FKBP1B)|2587 (GALR1)|2696 (GIPR)|2…
	N	GO|GO.CC	GO:1990351	transporter complex	8.83038e-15	1.00631e-09	37	478 (ATP1A3)|773 (CACNA1A)|774 (CACNA1B)|781 (CACNA2D1)|1141 (CHRNB2)|1261 (CNGA3)|2281 (FKBP1B)|2566 (GABRG2)|2742 (GLRA2)|2903 (GRIN2A)|2904 (GRIN2B)|2906 (GRIN2D)|3747 (KCNC2)|3756 (KCNH1)|3762 (KCNJ5)|3788 (KCNS2)|4842 (NOS1)|6331 (SCN5A)|6338 (SCNN1B)|6616 (SNAP25)|6833 (ABCC8)|7223 (TRPC4)|7224 (TRPC5)|8001 (GLRA3)|9177 (HTR3B)|9254 (CACNA2D2)|10021 (HCN4)|10368 (CACNG3)|10369 (CACNG2)|2294…
	N	GO|GO.MF	GO:0005216	ion channel activity	9.5084e-15	1.08358e-09	42	773 (CACNA1A)|774 (CACNA1B)|781 (CACNA2D1)|1141 (CHRNB2)|1261 (CNGA3)|1268 (CNR1)|2281 (FKBP1B)|2566 (GABRG2)|2742 (GLRA2)|2903 (GRIN2A)|2904 (GRIN2B)|2906 (GRIN2D)|3747 (KCNC2)|3756 (KCNH1)|3762 (KCNJ5)|3788 (KCNS2)|4988 (OPRM1)|6331 (SCN5A)|6338 (SCNN1B)|6616 (SNAP25)|6833 (ABCC8)|7223 (TRPC4)|7224 (TRPC5)|7442 (TRPV1)|8001 (GLRA3)|9177 (HTR3B)|9254 (CACNA2D2)|10021 (HCN4)|10368 (CACNG3)|10369 …
	N	GO|GO.CC	GO:0043679	axon terminus	1.0497e-14	1.19624e-09	23	116 (ADCYAP1)|793 (CALB1)|885 (CCK)|1006 (CDH8)|1131 (CHRM3)|1393 (CRHBP)|1395 (CRHR2)|1813 (DRD2)|2571 (GAD1)|2796 (GNRH1)|3747 (KCNC2)|4842 (NOS1)|4923 (NTSR1)|4986 (OPRK1)|5179 (PENK)|5864 (RAB3A)|6855 (SYP)|10814 (CPLX2)|10815 (CPLX1)|23025 (UNC13A)|29993 (PACSIN1)|112476 (PRRT2)|140679 (SLC32A1)
	N	GO|GO.BP	GO:0032501	multicellular organismal process	1.10482e-14	1.25906e-09	263	58 (ACTA1)|107 (ADCY1)|116 (ADCYAP1)|284 (ANGPT1)|367 (AR)|478 (ATP1A3)|774 (CACNA1B)|781 (CACNA2D1)|793 (CALB1)|885 (CCK)|1131 (CHRM3)|1141 (CHRNB2)|1149 (CIDEA)|1261 (CNGA3)|1268 (CNR1)|1292 (COL6A2)|1310 (COL19A1)|1381 (CRABP1)|1392 (CRH)|1393 (CRHBP)|1400 (CRMP1)|1608 (DGKG)|1627 (DBN1)|1641 (DCX)|1690 (COCH)|1745 (DLX1)|1749 (DLX5)|1813 (DRD2)|1816 (DRD5)|1832 (DSP)|1944 (EFNA3)|1946 (EFNA5)…
	N	GO|GO.CC	GO:0034702	ion channel complex	1.21039e-14	1.37936e-09	35	773 (CACNA1A)|774 (CACNA1B)|781 (CACNA2D1)|1141 (CHRNB2)|2281 (FKBP1B)|2566 (GABRG2)|2742 (GLRA2)|2903 (GRIN2A)|2904 (GRIN2B)|2906 (GRIN2D)|3747 (KCNC2)|3756 (KCNH1)|3762 (KCNJ5)|3788 (KCNS2)|4842 (NOS1)|6331 (SCN5A)|6338 (SCNN1B)|6616 (SNAP25)|6833 (ABCC8)|7223 (TRPC4)|7224 (TRPC5)|8001 (GLRA3)|9177 (HTR3B)|9254 (CACNA2D2)|10021 (HCN4)|10368 (CACNG3)|10369 (CACNG2)|22941 (SHANK2)|26047 (CNTNAP2)…
	N	GO|GO.CC	GO:0034703	cation channel complex	1.24825e-14	1.42251e-09	30	773 (CACNA1A)|774 (CACNA1B)|781 (CACNA2D1)|2281 (FKBP1B)|2903 (GRIN2A)|2904 (GRIN2B)|2906 (GRIN2D)|3747 (KCNC2)|3756 (KCNH1)|3762 (KCNJ5)|3788 (KCNS2)|4842 (NOS1)|6331 (SCN5A)|6338 (SCNN1B)|6616 (SNAP25)|6833 (ABCC8)|7223 (TRPC4)|7224 (TRPC5)|9177 (HTR3B)|9254 (CACNA2D2)|10021 (HCN4)|10368 (CACNG3)|10369 (CACNG2)|26047 (CNTNAP2)|55799 (CACNA2D3)|55800 (SCN3B)|56479 (KCNQ5)|80333 (KCNIP4)|170850 (…
	N	GO|GO.BP	GO:0030154	cell differentiation	1.6319e-14	1.85972e-09	170	58 (ACTA1)|107 (ADCY1)|116 (ADCYAP1)|284 (ANGPT1)|367 (AR)|862 (RUNX1T1)|885 (CCK)|1141 (CHRNB2)|1268 (CNR1)|1292 (COL6A2)|1310 (COL19A1)|1400 (CRMP1)|1608 (DGKG)|1627 (DBN1)|1641 (DCX)|1690 (COCH)|1745 (DLX1)|1749 (DLX5)|1813 (DRD2)|1832 (DSP)|1944 (EFNA3)|1946 (EFNA5)|1951 (CELSR3)|2042 (EPHA3)|2046 (EPHA8)|2048 (EPHB2)|2139 (EYA2)|2254 (FGF9)|2281 (FKBP1B)|2596 (GAP43)|2796 (GNRH1)|2817 (GPC1)…
	N	GO|GO.BP	GO:0023051	regulation of signaling	1.89672e-14	2.1615e-09	154	107 (ADCY1)|116 (ADCYAP1)|284 (ANGPT1)|367 (AR)|398 (ARHGDIG)|773 (CACNA1A)|793 (CALB1)|794 (CALB2)|885 (CCK)|1114 (CHGB)|1141 (CHRNB2)|1149 (CIDEA)|1268 (CNR1)|1392 (CRH)|1393 (CRHBP)|1395 (CRHR2)|1612 (DAPK1)|1627 (DBN1)|1745 (DLX1)|1749 (DLX5)|1759 (DNM1)|1813 (DRD2)|1816 (DRD5)|1946 (EFNA5)|2042 (EPHA3)|2046 (EPHA8)|2048 (EPHB2)|2139 (EYA2)|2254 (FGF9)|2281 (FKBP1B)|2587 (GALR1)|2696 (GIPR)|2…
	N	GO|GO.BP	GO:0007610	behavior	2.01756e-14	2.29921e-09	49	107 (ADCY1)|116 (ADCYAP1)|774 (CACNA1B)|793 (CALB1)|885 (CCK)|1141 (CHRNB2)|1268 (CNR1)|1392 (CRH)|1393 (CRHBP)|1813 (DRD2)|1816 (DRD5)|2048 (EPHB2)|2334 (AFF2)|2566 (GABRG2)|2571 (GAD1)|2834 (PRLHR)|2903 (GRIN2A)|2904 (GRIN2B)|2906 (GRIN2D)|3084 (NRG1)|3350 (HTR1A)|4808 (NHLH2)|4886 (NPY1R)|4887 (NPY2R)|4923 (NTSR1)|4986 (OPRK1)|4988 (OPRM1)|5179 (PENK)|5575 (PRKAR1B)|5581 (PRKCE)|6616 (SNAP25)|…
	N	GO|GO.MF	GO:0022839	ion gated channel activity	2.05512e-14	2.34201e-09	37	773 (CACNA1A)|774 (CACNA1B)|781 (CACNA2D1)|1141 (CHRNB2)|1261 (CNGA3)|1268 (CNR1)|2281 (FKBP1B)|2566 (GABRG2)|2742 (GLRA2)|2903 (GRIN2A)|2904 (GRIN2B)|2906 (GRIN2D)|3747 (KCNC2)|3756 (KCNH1)|3762 (KCNJ5)|3788 (KCNS2)|4988 (OPRM1)|6331 (SCN5A)|6338 (SCNN1B)|6616 (SNAP25)|6833 (ABCC8)|7442 (TRPV1)|8001 (GLRA3)|9177 (HTR3B)|9254 (CACNA2D2)|10021 (HCN4)|10368 (CACNG3)|10369 (CACNG2)|55799 (CACNA2D3)|…
	N	GO|GO.BP	GO:0007417	central nervous system development	2.06182e-14	2.34965e-09	65	107 (ADCY1)|116 (ADCYAP1)|1141 (CHRNB2)|1392 (CRH)|1641 (DCX)|1745 (DLX1)|1749 (DLX5)|1813 (DRD2)|2048 (EPHB2)|2254 (FGF9)|2334 (AFF2)|2903 (GRIN2A)|2904 (GRIN2B)|2906 (GRIN2D)|3084 (NRG1)|3208 (HPCA)|3747 (KCNC2)|3925 (STMN1)|4808 (NHLH2)|5274 (SERPINI1)|5999 (RGS4)|6092 (ROBO2)|6331 (SCN5A)|6456 (SH3GL2)|6585 (SLIT1)|6664 (SOX11)|6752 (SSTR2)|6857 (SYT1)|6860 (SYT4)|7161 (TP73)|7223 (TRPC4)|754…
	N	GO|GO.BP	GO:0006811	ion transport	2.64416e-14	3.01329e-09	91	116 (ADCYAP1)|478 (ATP1A3)|534 (ATP6V1G2)|773 (CACNA1A)|774 (CACNA1B)|781 (CACNA2D1)|885 (CCK)|1141 (CHRNB2)|1261 (CNGA3)|1268 (CNR1)|1392 (CRH)|1393 (CRHBP)|1612 (DAPK1)|1813 (DRD2)|2048 (EPHB2)|2170 (FABP3)|2281 (FKBP1B)|2566 (GABRG2)|2742 (GLRA2)|2903 (GRIN2A)|2904 (GRIN2B)|2906 (GRIN2D)|2912 (GRM2)|3208 (HPCA)|3350 (HTR1A)|3747 (KCNC2)|3756 (KCNH1)|3762 (KCNJ5)|3788 (KCNS2)|4842 (NOS1)|4887 (…
	N	GO|GO.BP	GO:0001505	regulation of neurotransmitter levels	2.96376e-14	3.3775e-09	37	107 (ADCY1)|774 (CACNA1B)|1141 (CHRNB2)|1268 (CNR1)|1813 (DRD2)|2571 (GAD1)|2572 (GAD2)|2903 (GRIN2A)|3350 (HTR1A)|4842 (NOS1)|4923 (NTSR1)|5864 (RAB3A)|5865 (RAB3B)|5999 (RGS4)|6616 (SNAP25)|6812 (STXBP1)|6853 (SYN1)|6855 (SYP)|6857 (SYT1)|6860 (SYT4)|6861 (SYT5)|7442 (TRPV1)|8224 (SYN3)|8447 (DOC2B)|8448 (DOC2A)|10814 (CPLX2)|10815 (CPLX1)|23025 (UNC13A)|26059 (ERC2)|51760 (SYT17)|57586 (SYT13)…
	N	GO|GO.MF	GO:0022838	substrate-specific channel activity	3.13518e-14	3.57286e-09	42	773 (CACNA1A)|774 (CACNA1B)|781 (CACNA2D1)|1141 (CHRNB2)|1261 (CNGA3)|1268 (CNR1)|2281 (FKBP1B)|2566 (GABRG2)|2742 (GLRA2)|2903 (GRIN2A)|2904 (GRIN2B)|2906 (GRIN2D)|3747 (KCNC2)|3756 (KCNH1)|3762 (KCNJ5)|3788 (KCNS2)|4988 (OPRM1)|6331 (SCN5A)|6338 (SCNN1B)|6616 (SNAP25)|6833 (ABCC8)|7223 (TRPC4)|7224 (TRPC5)|7442 (TRPV1)|8001 (GLRA3)|9177 (HTR3B)|9254 (CACNA2D2)|10021 (HCN4)|10368 (CACNG3)|10369 …
	N	GO|GO.BP	GO:0017156	calcium ion regulated exocytosis	3.44794e-14	3.92927e-09	25	107 (ADCY1)|1141 (CHRNB2)|1268 (CNR1)|1813 (DRD2)|5864 (RAB3A)|6616 (SNAP25)|6812 (STXBP1)|6853 (SYN1)|6855 (SYP)|6857 (SYT1)|6860 (SYT4)|6861 (SYT5)|8447 (DOC2B)|8448 (DOC2A)|10814 (CPLX2)|10815 (CPLX1)|23025 (UNC13A)|26059 (ERC2)|51760 (SYT17)|55503 (TRPV6)|57586 (SYT13)|63908 (NAPB)|84258 (SYT3)|112476 (PRRT2)|148281 (SYT6)
	N	GO|GO.BP	GO:0042391	regulation of membrane potential	3.57538e-14	4.07451e-09	41	116 (ADCYAP1)|478 (ATP1A3)|773 (CACNA1A)|774 (CACNA1B)|781 (CACNA2D1)|885 (CCK)|1141 (CHRNB2)|1268 (CNR1)|1813 (DRD2)|1832 (DSP)|2281 (FKBP1B)|2566 (GABRG2)|2742 (GLRA2)|2903 (GRIN2A)|2904 (GRIN2B)|2906 (GRIN2D)|3747 (KCNC2)|3756 (KCNH1)|3762 (KCNJ5)|4887 (NPY2R)|4923 (NTSR1)|4988 (OPRM1)|5999 (RGS4)|6331 (SCN5A)|7224 (TRPC5)|7442 (TRPV1)|8001 (GLRA3)|9177 (HTR3B)|9481 (SLC25A27)|10021 (HCN4)|103…
	N	GO|GO.MF	GO:0015267	channel activity	4.5911e-14	5.23202e-09	43	773 (CACNA1A)|774 (CACNA1B)|781 (CACNA2D1)|1141 (CHRNB2)|1261 (CNGA3)|1268 (CNR1)|2281 (FKBP1B)|2566 (GABRG2)|2742 (GLRA2)|2903 (GRIN2A)|2904 (GRIN2B)|2906 (GRIN2D)|3747 (KCNC2)|3756 (KCNH1)|3762 (KCNJ5)|3788 (KCNS2)|4988 (OPRM1)|6331 (SCN5A)|6338 (SCNN1B)|6616 (SNAP25)|6833 (ABCC8)|7223 (TRPC4)|7224 (TRPC5)|7442 (TRPV1)|8001 (GLRA3)|9177 (HTR3B)|9254 (CACNA2D2)|10021 (HCN4)|10368 (CACNG3)|10369 …
	N	GO|GO.MF	GO:0022836	gated channel activity	4.64761e-14	5.29642e-09	37	773 (CACNA1A)|774 (CACNA1B)|781 (CACNA2D1)|1141 (CHRNB2)|1261 (CNGA3)|1268 (CNR1)|2281 (FKBP1B)|2566 (GABRG2)|2742 (GLRA2)|2903 (GRIN2A)|2904 (GRIN2B)|2906 (GRIN2D)|3747 (KCNC2)|3756 (KCNH1)|3762 (KCNJ5)|3788 (KCNS2)|4988 (OPRM1)|6331 (SCN5A)|6338 (SCNN1B)|6616 (SNAP25)|6833 (ABCC8)|7442 (TRPV1)|8001 (GLRA3)|9177 (HTR3B)|9254 (CACNA2D2)|10021 (HCN4)|10368 (CACNG3)|10369 (CACNG2)|55799 (CACNA2D3)|…
	N	GO|GO.MF	GO:0022803	passive transmembrane transporter activity	4.94561e-14	5.63601e-09	43	773 (CACNA1A)|774 (CACNA1B)|781 (CACNA2D1)|1141 (CHRNB2)|1261 (CNGA3)|1268 (CNR1)|2281 (FKBP1B)|2566 (GABRG2)|2742 (GLRA2)|2903 (GRIN2A)|2904 (GRIN2B)|2906 (GRIN2D)|3747 (KCNC2)|3756 (KCNH1)|3762 (KCNJ5)|3788 (KCNS2)|4988 (OPRM1)|6331 (SCN5A)|6338 (SCNN1B)|6616 (SNAP25)|6833 (ABCC8)|7223 (TRPC4)|7224 (TRPC5)|7442 (TRPV1)|8001 (GLRA3)|9177 (HTR3B)|9254 (CACNA2D2)|10021 (HCN4)|10368 (CACNG3)|10369 …
	N	GO|GO.MF	GO:0022843	voltage-gated cation channel activity	6.11415e-14	6.96769e-09	24	773 (CACNA1A)|774 (CACNA1B)|781 (CACNA2D1)|1268 (CNR1)|2903 (GRIN2A)|2904 (GRIN2B)|2906 (GRIN2D)|3747 (KCNC2)|3756 (KCNH1)|3762 (KCNJ5)|3788 (KCNS2)|4988 (OPRM1)|6616 (SNAP25)|6833 (ABCC8)|9254 (CACNA2D2)|10021 (HCN4)|10368 (CACNG3)|10369 (CACNG2)|55799 (CACNA2D3)|56479 (KCNQ5)|57582 (KCNT1)|90134 (KCNH7)|170850 (KCNG3)|348980 (HCN1)
	N	GO|GO.BP	GO:0032879	regulation of localization	7.381e-14	8.41139e-09	127	107 (ADCY1)|116 (ADCYAP1)|284 (ANGPT1)|367 (AR)|398 (ARHGDIG)|773 (CACNA1A)|774 (CACNA1B)|781 (CACNA2D1)|885 (CCK)|1141 (CHRNB2)|1149 (CIDEA)|1268 (CNR1)|1392 (CRH)|1393 (CRHBP)|1612 (DAPK1)|1759 (DNM1)|1813 (DRD2)|1832 (DSP)|1946 (EFNA5)|1951 (CELSR3)|2042 (EPHA3)|2048 (EPHB2)|2254 (FGF9)|2281 (FKBP1B)|2587 (GALR1)|2696 (GIPR)|2796 (GNRH1)|3084 (NRG1)|3208 (HPCA)|3350 (HTR1A)|3623 (INHA)|3747 (K…
	N	GO|GO.BP	GO:0050806	positive regulation of synaptic transmission	8.57599e-14	9.77319e-09	25	116 (ADCYAP1)|793 (CALB1)|794 (CALB2)|1141 (CHRNB2)|1268 (CNR1)|1392 (CRH)|1395 (CRHR2)|1813 (DRD2)|2048 (EPHB2)|2903 (GRIN2A)|2904 (GRIN2B)|2906 (GRIN2D)|4923 (NTSR1)|5581 (PRKCE)|5865 (RAB3B)|5999 (RGS4)|6616 (SNAP25)|6812 (STXBP1)|6857 (SYT1)|9211 (LGI1)|10368 (CACNG3)|10369 (CACNG2)|22941 (SHANK2)|23025 (UNC13A)|27065 (NSG1)
	N	GO|GO.CC	GO:0030133	transport vesicle	1.2146e-13	1.38416e-08	38	1759 (DNM1)|1813 (DRD2)|2572 (GAD2)|2903 (GRIN2A)|4986 (OPRK1)|5122 (PCSK1)|5179 (PENK)|5864 (RAB3A)|5865 (RAB3B)|6456 (SH3GL2)|6616 (SNAP25)|6833 (ABCC8)|6853 (SYN1)|6855 (SYP)|6857 (SYT1)|6860 (SYT4)|6861 (SYT5)|7425 (VGF)|8224 (SYN3)|8448 (DOC2A)|8927 (BSN)|9143 (SYNGR3)|9899 (SV2B)|22987 (SV2C)|23025 (UNC13A)|51760 (SYT17)|55530 (SVOP)|57586 (SYT13)|79772 (MCTP1)|80023 (NRSN2)|84258 (SYT3)|84…
	N	GO|GO.BP	GO:0098655	cation transmembrane transport	2.34852e-13	2.67638e-08	58	478 (ATP1A3)|534 (ATP6V1G2)|773 (CACNA1A)|774 (CACNA1B)|781 (CACNA2D1)|1261 (CNGA3)|1392 (CRH)|1393 (CRHBP)|1612 (DAPK1)|1813 (DRD2)|2048 (EPHB2)|2281 (FKBP1B)|2903 (GRIN2A)|2904 (GRIN2B)|2906 (GRIN2D)|3208 (HPCA)|3747 (KCNC2)|3756 (KCNH1)|3762 (KCNJ5)|3788 (KCNS2)|4842 (NOS1)|4923 (NTSR1)|4986 (OPRK1)|4988 (OPRM1)|5581 (PRKCE)|5999 (RGS4)|6331 (SCN5A)|6338 (SCNN1B)|6534 (SLC6A7)|6616 (SNAP25)|68…
	N	GO|GO.BP	GO:0120035	regulation of plasma membrane bounded cell projection organization	3.13986e-13	3.57818e-08	50	116 (ADCYAP1)|1141 (CHRNB2)|1268 (CNR1)|1400 (CRMP1)|1627 (DBN1)|1946 (EFNA5)|2042 (EPHA3)|2048 (EPHB2)|2281 (FKBP1B)|2596 (GAP43)|2904 (GRIN2B)|3897 (L1CAM)|4804 (NGFR)|5063 (PAK3)|5274 (SERPINI1)|6014 (RIT2)|6092 (ROBO2)|6616 (SNAP25)|6857 (SYT1)|6860 (SYT4)|7070 (THY1)|7224 (TRPC5)|8851 (CDK5R1)|9362 (CPNE6)|9856 (KIAA0319)|9912 (ARHGAP44)|10371 (SEMA3A)|10439 (OLFM1)|10716 (TBR1)|11075 (STMN2…
	N	GO|GO.BP	GO:0007420	brain development	3.21941e-13	3.66884e-08	53	107 (ADCY1)|116 (ADCYAP1)|1141 (CHRNB2)|1392 (CRH)|1745 (DLX1)|1749 (DLX5)|1813 (DRD2)|2048 (EPHB2)|2254 (FGF9)|2334 (AFF2)|2903 (GRIN2A)|2904 (GRIN2B)|2906 (GRIN2D)|3084 (NRG1)|3208 (HPCA)|3747 (KCNC2)|3925 (STMN1)|5999 (RGS4)|6092 (ROBO2)|6331 (SCN5A)|6585 (SLIT1)|6752 (SSTR2)|6857 (SYT1)|6860 (SYT4)|7545 (ZIC1)|7546 (ZIC2)|8851 (CDK5R1)|9118 (INA)|9143 (SYNGR3)|9253 (NUMBL)|10371 (SEMA3A)|1040…
	N	GO|GO.MF	GO:0005244	voltage-gated ion channel activity	3.42022e-13	3.89768e-08	27	773 (CACNA1A)|774 (CACNA1B)|781 (CACNA2D1)|1268 (CNR1)|2903 (GRIN2A)|2904 (GRIN2B)|2906 (GRIN2D)|3747 (KCNC2)|3756 (KCNH1)|3762 (KCNJ5)|3788 (KCNS2)|4988 (OPRM1)|6331 (SCN5A)|6616 (SNAP25)|6833 (ABCC8)|9254 (CACNA2D2)|10021 (HCN4)|10368 (CACNG3)|10369 (CACNG2)|55799 (CACNA2D3)|55800 (SCN3B)|56479 (KCNQ5)|57582 (KCNT1)|80333 (KCNIP4)|90134 (KCNH7)|170850 (KCNG3)|348980 (HCN1)
	N	GO|GO.MF	GO:0022832	voltage-gated channel activity	3.42022e-13	3.89768e-08	27	773 (CACNA1A)|774 (CACNA1B)|781 (CACNA2D1)|1268 (CNR1)|2903 (GRIN2A)|2904 (GRIN2B)|2906 (GRIN2D)|3747 (KCNC2)|3756 (KCNH1)|3762 (KCNJ5)|3788 (KCNS2)|4988 (OPRM1)|6331 (SCN5A)|6616 (SNAP25)|6833 (ABCC8)|9254 (CACNA2D2)|10021 (HCN4)|10368 (CACNG3)|10369 (CACNG2)|55799 (CACNA2D3)|55800 (SCN3B)|56479 (KCNQ5)|57582 (KCNT1)|80333 (KCNIP4)|90134 (KCNH7)|170850 (KCNG3)|348980 (HCN1)
	N	GO|GO.MF	GO:0022890	inorganic cation transmembrane transporter activity	3.46933e-13	3.95364e-08	48	478 (ATP1A3)|773 (CACNA1A)|774 (CACNA1B)|781 (CACNA2D1)|1141 (CHRNB2)|1261 (CNGA3)|1268 (CNR1)|2281 (FKBP1B)|2903 (GRIN2A)|2904 (GRIN2B)|2906 (GRIN2D)|3747 (KCNC2)|3756 (KCNH1)|3762 (KCNJ5)|3788 (KCNS2)|4988 (OPRM1)|6331 (SCN5A)|6338 (SCNN1B)|6534 (SLC6A7)|6616 (SNAP25)|6833 (ABCC8)|7223 (TRPC4)|7224 (TRPC5)|7442 (TRPV1)|9177 (HTR3B)|9254 (CACNA2D2)|10021 (HCN4)|10368 (CACNG3)|10369 (CACNG2)|5130…
	N	GO|GO.BP	GO:1903530	regulation of secretion by cell	3.59374e-13	4.09542e-08	53	107 (ADCY1)|116 (ADCYAP1)|284 (ANGPT1)|773 (CACNA1A)|885 (CCK)|1141 (CHRNB2)|1149 (CIDEA)|1268 (CNR1)|1392 (CRH)|1393 (CRHBP)|1813 (DRD2)|1946 (EFNA5)|2281 (FKBP1B)|2587 (GALR1)|2696 (GIPR)|3350 (HTR1A)|3623 (INHA)|3747 (KCNC2)|4345 (CD200)|4887 (NPY2R)|4923 (NTSR1)|4986 (OPRK1)|4988 (OPRM1)|5581 (PRKCE)|5864 (RAB3A)|5865 (RAB3B)|6616 (SNAP25)|6664 (SOX11)|6812 (STXBP1)|6833 (ABCC8)|6853 (SYN1)|6…
	N	GO|GO.CC	GO:0098984	neuron to neuron synapse	5.50846e-13	6.27744e-08	35	107 (ADCY1)|793 (CALB1)|1131 (CHRM3)|1627 (DBN1)|1759 (DNM1)|1813 (DRD2)|2596 (GAP43)|2903 (GRIN2A)|2904 (GRIN2B)|2906 (GRIN2D)|3756 (KCNH1)|4744 (NEFH)|4842 (NOS1)|4923 (NTSR1)|5063 (PAK3)|5179 (PENK)|5575 (PRKAR1B)|6456 (SH3GL2)|6853 (SYN1)|6857 (SYT1)|8224 (SYN3)|8851 (CDK5R1)|8927 (BSN)|9228 (DLGAP2)|9758 (FRMPD4)|9829 (DNAJC6)|9912 (ARHGAP44)|10368 (CACNG3)|10369 (CACNG2)|22941 (SHANK2)|2362…
	N	GO|GO.BP	GO:0031344	regulation of cell projection organization	5.60493e-13	6.38738e-08	50	116 (ADCYAP1)|1141 (CHRNB2)|1268 (CNR1)|1400 (CRMP1)|1627 (DBN1)|1946 (EFNA5)|2042 (EPHA3)|2048 (EPHB2)|2281 (FKBP1B)|2596 (GAP43)|2904 (GRIN2B)|3897 (L1CAM)|4804 (NGFR)|5063 (PAK3)|5274 (SERPINI1)|6014 (RIT2)|6092 (ROBO2)|6616 (SNAP25)|6857 (SYT1)|6860 (SYT4)|7070 (THY1)|7224 (TRPC5)|8851 (CDK5R1)|9362 (CPNE6)|9856 (KIAA0319)|9912 (ARHGAP44)|10371 (SEMA3A)|10439 (OLFM1)|10716 (TBR1)|11075 (STMN2…
	N	GO|GO.CC	GO:0030658	transport vesicle membrane	6.2722e-13	7.1478e-08	27	1813 (DRD2)|2572 (GAD2)|4986 (OPRK1)|5864 (RAB3A)|5865 (RAB3B)|6456 (SH3GL2)|6833 (ABCC8)|6853 (SYN1)|6855 (SYP)|6857 (SYT1)|6860 (SYT4)|6861 (SYT5)|8224 (SYN3)|8448 (DOC2A)|9143 (SYNGR3)|9899 (SV2B)|22987 (SV2C)|23025 (UNC13A)|55530 (SVOP)|79772 (MCTP1)|84258 (SYT3)|112476 (PRRT2)|115827 (RAB3C)|132204 (SYNPR)|140679 (SLC32A1)|148281 (SYT6)|388662 (SLC6A17)
	N	GO|GO.BP	GO:0051046	regulation of secretion	6.45585e-13	7.35708e-08	55	107 (ADCY1)|116 (ADCYAP1)|284 (ANGPT1)|773 (CACNA1A)|885 (CCK)|1141 (CHRNB2)|1149 (CIDEA)|1268 (CNR1)|1392 (CRH)|1393 (CRHBP)|1813 (DRD2)|1946 (EFNA5)|2281 (FKBP1B)|2587 (GALR1)|2696 (GIPR)|3084 (NRG1)|3350 (HTR1A)|3623 (INHA)|3747 (KCNC2)|4345 (CD200)|4887 (NPY2R)|4923 (NTSR1)|4986 (OPRK1)|4988 (OPRM1)|5581 (PRKCE)|5864 (RAB3A)|5865 (RAB3B)|6616 (SNAP25)|6664 (SOX11)|6812 (STXBP1)|6833 (ABCC8)|6…
	N	GO|GO.MF	GO:0019905	syntaxin binding	6.97992e-13	7.95432e-08	17	773 (CACNA1A)|1612 (DAPK1)|6616 (SNAP25)|6812 (STXBP1)|6857 (SYT1)|6860 (SYT4)|6861 (SYT5)|8447 (DOC2B)|10814 (CPLX2)|10815 (CPLX1)|23025 (UNC13A)|51760 (SYT17)|57586 (SYT13)|63908 (NAPB)|84258 (SYT3)|112476 (PRRT2)|148281 (SYT6)
	N	GO|GO.MF	GO:0046873	metal ion transmembrane transporter activity	7.41432e-13	8.44936e-08	40	478 (ATP1A3)|773 (CACNA1A)|774 (CACNA1B)|781 (CACNA2D1)|1268 (CNR1)|2281 (FKBP1B)|2903 (GRIN2A)|2904 (GRIN2B)|2906 (GRIN2D)|3747 (KCNC2)|3756 (KCNH1)|3762 (KCNJ5)|3788 (KCNS2)|4988 (OPRM1)|6331 (SCN5A)|6338 (SCNN1B)|6534 (SLC6A7)|6616 (SNAP25)|6833 (ABCC8)|7223 (TRPC4)|7224 (TRPC5)|7442 (TRPV1)|9254 (CACNA2D2)|10021 (HCN4)|10368 (CACNG3)|10369 (CACNG2)|51305 (KCNK9)|55117 (SLC6A15)|55503 (TRPV6)|…
	N	GO|GO.BP	GO:0051952	regulation of amine transport	8.16372e-13	9.30338e-08	19	885 (CCK)|1141 (CHRNB2)|1268 (CNR1)|1392 (CRH)|1813 (DRD2)|4887 (NPY2R)|4923 (NTSR1)|4986 (OPRK1)|5865 (RAB3B)|5999 (RGS4)|6812 (STXBP1)|6857 (SYT1)|6860 (SYT4)|6861 (SYT5)|7432 (VIP)|51760 (SYT17)|57586 (SYT13)|84258 (SYT3)|148281 (SYT6)
	N	GO|GO.BP	GO:0048869	cellular developmental process	8.55264e-13	9.74659e-08	170	58 (ACTA1)|107 (ADCY1)|116 (ADCYAP1)|284 (ANGPT1)|367 (AR)|862 (RUNX1T1)|885 (CCK)|1141 (CHRNB2)|1268 (CNR1)|1292 (COL6A2)|1310 (COL19A1)|1400 (CRMP1)|1608 (DGKG)|1627 (DBN1)|1641 (DCX)|1690 (COCH)|1745 (DLX1)|1749 (DLX5)|1813 (DRD2)|1832 (DSP)|1944 (EFNA3)|1946 (EFNA5)|1951 (CELSR3)|2042 (EPHA3)|2046 (EPHA8)|2048 (EPHB2)|2139 (EYA2)|2254 (FGF9)|2281 (FKBP1B)|2596 (GAP43)|2796 (GNRH1)|2817 (GPC1)…
	N	GO|GO.CC	GO:0042734	presynaptic membrane	8.9777e-13	1.0231e-07	24	1131 (CHRM3)|1141 (CHRNB2)|1268 (CNR1)|1759 (DNM1)|1813 (DRD2)|2048 (EPHB2)|2572 (GAD2)|2903 (GRIN2A)|2912 (GRM2)|3747 (KCNC2)|3756 (KCNH1)|4986 (OPRK1)|4988 (OPRM1)|6616 (SNAP25)|6812 (STXBP1)|6855 (SYP)|6857 (SYT1)|23025 (UNC13A)|26059 (ERC2)|53942 (CNTN5)|84628 (NTNG2)|85445 (CNTNAP4)|112476 (PRRT2)|386617 (KCTD8)
	N	GO|GO.CC	GO:0098590	plasma membrane region	1.55828e-12	1.77582e-07	70	107 (ADCY1)|794 (CALB2)|1006 (CDH8)|1131 (CHRM3)|1141 (CHRNB2)|1268 (CNR1)|1627 (DBN1)|1759 (DNM1)|1813 (DRD2)|1816 (DRD5)|1832 (DSP)|1946 (EFNA5)|2048 (EPHB2)|2566 (GABRG2)|2572 (GAD2)|2596 (GAP43)|2742 (GLRA2)|2903 (GRIN2A)|2904 (GRIN2B)|2906 (GRIN2D)|2912 (GRM2)|3208 (HPCA)|3747 (KCNC2)|3756 (KCNH1)|3880 (KRT19)|4233 (MET)|4842 (NOS1)|4986 (OPRK1)|4988 (OPRM1)|5657 (PRTN3)|6092 (ROBO2)|6331 (S…
	N	GO|GO.BP	GO:0034220	ion transmembrane transport	1.67628e-12	1.91029e-07	68	478 (ATP1A3)|534 (ATP6V1G2)|773 (CACNA1A)|774 (CACNA1B)|781 (CACNA2D1)|1141 (CHRNB2)|1261 (CNGA3)|1392 (CRH)|1393 (CRHBP)|1612 (DAPK1)|1813 (DRD2)|2048 (EPHB2)|2281 (FKBP1B)|2566 (GABRG2)|2742 (GLRA2)|2903 (GRIN2A)|2904 (GRIN2B)|2906 (GRIN2D)|3208 (HPCA)|3747 (KCNC2)|3756 (KCNH1)|3762 (KCNJ5)|3788 (KCNS2)|4842 (NOS1)|4923 (NTSR1)|4986 (OPRK1)|4988 (OPRM1)|5581 (PRKCE)|5999 (RGS4)|6331 (SCN5A)|633…
	N	GO|GO.CC	GO:0044425	membrane part	2.47298e-12	2.8182e-07	237	107 (ADCY1)|284 (ANGPT1)|432 (ASGR1)|478 (ATP1A3)|534 (ATP6V1G2)|773 (CACNA1A)|774 (CACNA1B)|781 (CACNA2D1)|794 (CALB2)|956 (ENTPD3)|1005 (CDH7)|1006 (CDH8)|1010 (CDH12)|1131 (CHRM3)|1141 (CHRNB2)|1261 (CNGA3)|1268 (CNR1)|1395 (CRHR2)|1534 (CYB561)|1627 (DBN1)|1759 (DNM1)|1813 (DRD2)|1816 (DRD5)|1832 (DSP)|1944 (EFNA3)|1946 (EFNA5)|1951 (CELSR3)|2042 (EPHA3)|2046 (EPHA8)|2048 (EPHB2)|2281 (FKBP1B…
	N	GO|GO.CC	GO:0030054	cell junction	2.63458e-12	3.00237e-07	73	794 (CALB2)|1005 (CDH7)|1006 (CDH8)|1010 (CDH12)|1131 (CHRM3)|1141 (CHRNB2)|1627 (DBN1)|1832 (DSP)|1946 (EFNA5)|2566 (GABRG2)|2572 (GAD2)|2596 (GAP43)|2742 (GLRA2)|2903 (GRIN2A)|2904 (GRIN2B)|2906 (GRIN2D)|2912 (GRM2)|3747 (KCNC2)|3756 (KCNH1)|3897 (L1CAM)|4988 (OPRM1)|6331 (SCN5A)|6616 (SNAP25)|6853 (SYN1)|6855 (SYP)|6857 (SYT1)|6860 (SYT4)|6861 (SYT5)|7070 (THY1)|7161 (TP73)|7223 (TRPC4)|7442 (…
	N	GO|GO.BP	GO:0015837	amine transport	3.16258e-12	3.60407e-07	19	885 (CCK)|1141 (CHRNB2)|1268 (CNR1)|1392 (CRH)|1813 (DRD2)|4887 (NPY2R)|4923 (NTSR1)|4986 (OPRK1)|5865 (RAB3B)|5999 (RGS4)|6812 (STXBP1)|6857 (SYT1)|6860 (SYT4)|6861 (SYT5)|7432 (VIP)|51760 (SYT17)|57586 (SYT13)|84258 (SYT3)|148281 (SYT6)
	N	GO|GO.BP	GO:0060322	head development	3.27689e-12	3.73435e-07	53	107 (ADCY1)|116 (ADCYAP1)|1141 (CHRNB2)|1392 (CRH)|1745 (DLX1)|1749 (DLX5)|1813 (DRD2)|2048 (EPHB2)|2254 (FGF9)|2334 (AFF2)|2903 (GRIN2A)|2904 (GRIN2B)|2906 (GRIN2D)|3084 (NRG1)|3208 (HPCA)|3747 (KCNC2)|3925 (STMN1)|5999 (RGS4)|6092 (ROBO2)|6331 (SCN5A)|6585 (SLIT1)|6752 (SSTR2)|6857 (SYT1)|6860 (SYT4)|7545 (ZIC1)|7546 (ZIC2)|8851 (CDK5R1)|9118 (INA)|9143 (SYNGR3)|9253 (NUMBL)|10371 (SEMA3A)|1040…
	N	GO|GO.BP	GO:0050808	synapse organization	3.4286e-12	3.90723e-07	36	1006 (CDH8)|1141 (CHRNB2)|1813 (DRD2)|1946 (EFNA5)|2048 (EPHB2)|2596 (GAP43)|2904 (GRIN2B)|3084 (NRG1)|3897 (L1CAM)|4744 (NEFH)|5063 (PAK3)|5864 (RAB3A)|6092 (ROBO2)|6585 (SLIT1)|6620 (SNCB)|6853 (SYN1)|8851 (CDK5R1)|8927 (BSN)|9118 (INA)|9254 (CACNA2D2)|9758 (FRMPD4)|9912 (ARHGAP44)|10369 (CACNG2)|22941 (SHANK2)|23025 (UNC13A)|26059 (ERC2)|26280 (IL1RAPL2)|53942 (CNTN5)|54549 (SDK2)|84628 (NTNG2…
	N	GO|GO.BP	GO:0098662	inorganic cation transmembrane transport	4.00135e-12	4.55994e-07	52	478 (ATP1A3)|534 (ATP6V1G2)|773 (CACNA1A)|774 (CACNA1B)|781 (CACNA2D1)|1261 (CNGA3)|1813 (DRD2)|2281 (FKBP1B)|2903 (GRIN2A)|2904 (GRIN2B)|2906 (GRIN2D)|3208 (HPCA)|3747 (KCNC2)|3756 (KCNH1)|3762 (KCNJ5)|3788 (KCNS2)|4842 (NOS1)|4923 (NTSR1)|4986 (OPRK1)|4988 (OPRM1)|5581 (PRKCE)|5999 (RGS4)|6331 (SCN5A)|6338 (SCNN1B)|6616 (SNAP25)|6833 (ABCC8)|7070 (THY1)|7223 (TRPC4)|7224 (TRPC5)|7442 (TRPV1)|92…
	N	GO|GO.BP	GO:0050794	regulation of cellular process	4.29253e-12	4.89177e-07	334	107 (ADCY1)|116 (ADCYAP1)|284 (ANGPT1)|367 (AR)|398 (ARHGDIG)|534 (ATP6V1G2)|773 (CACNA1A)|793 (CALB1)|794 (CALB2)|862 (RUNX1T1)|885 (CCK)|1006 (CDH8)|1114 (CHGB)|1131 (CHRM3)|1141 (CHRNB2)|1149 (CIDEA)|1261 (CNGA3)|1268 (CNR1)|1381 (CRABP1)|1392 (CRH)|1393 (CRHBP)|1395 (CRHR2)|1400 (CRMP1)|1608 (DGKG)|1612 (DAPK1)|1627 (DBN1)|1641 (DCX)|1690 (COCH)|1745 (DLX1)|1749 (DLX5)|1759 (DNM1)|1813 (DRD2)…
	N	GO|GO.BP	GO:0048167	regulation of synaptic plasticity	4.40321e-12	5.0179e-07	24	793 (CALB1)|794 (CALB2)|1392 (CRH)|1395 (CRHR2)|1627 (DBN1)|1813 (DRD2)|1816 (DRD5)|2048 (EPHB2)|2903 (GRIN2A)|2904 (GRIN2B)|2906 (GRIN2D)|5864 (RAB3A)|6616 (SNAP25)|6812 (STXBP1)|6855 (SYP)|6860 (SYT4)|7532 (YWHAG)|10814 (CPLX2)|22941 (SHANK2)|23025 (UNC13A)|27065 (NSG1)|79772 (MCTP1)|112476 (PRRT2)|392862 (GRID2IP)
	N	GO|GO.BP	GO:0050769	positive regulation of neurogenesis	5.93441e-12	6.76285e-07	39	116 (ADCYAP1)|1268 (CNR1)|1745 (DLX1)|1813 (DRD2)|1946 (EFNA5)|2042 (EPHA3)|2048 (EPHB2)|2281 (FKBP1B)|3897 (L1CAM)|4674 (NAP1L2)|4804 (NGFR)|4988 (OPRM1)|5063 (PAK3)|5121 (PCP4)|5274 (SERPINI1)|6014 (RIT2)|6092 (ROBO2)|6664 (SOX11)|6857 (SYT1)|6860 (SYT4)|7161 (TP73)|7224 (TRPC5)|9253 (NUMBL)|9362 (CPNE6)|10371 (SEMA3A)|11075 (STMN2)|22941 (SHANK2)|23025 (UNC13A)|26039 (SS18L1)|29993 (PACSIN1)|5…
	N	GO|GO.MF	GO:0008324	cation transmembrane transporter activity	6.16089e-12	7.02095e-07	48	478 (ATP1A3)|773 (CACNA1A)|774 (CACNA1B)|781 (CACNA2D1)|1141 (CHRNB2)|1261 (CNGA3)|1268 (CNR1)|2281 (FKBP1B)|2903 (GRIN2A)|2904 (GRIN2B)|2906 (GRIN2D)|3747 (KCNC2)|3756 (KCNH1)|3762 (KCNJ5)|3788 (KCNS2)|4988 (OPRM1)|6331 (SCN5A)|6338 (SCNN1B)|6534 (SLC6A7)|6616 (SNAP25)|6833 (ABCC8)|7223 (TRPC4)|7224 (TRPC5)|7442 (TRPV1)|9177 (HTR3B)|9254 (CACNA2D2)|10021 (HCN4)|10368 (CACNG3)|10369 (CACNG2)|5130…
	N	GO|GO.BP	GO:0098660	inorganic ion transmembrane transport	7.26669e-12	8.28112e-07	55	478 (ATP1A3)|534 (ATP6V1G2)|773 (CACNA1A)|774 (CACNA1B)|781 (CACNA2D1)|1261 (CNGA3)|1813 (DRD2)|2281 (FKBP1B)|2566 (GABRG2)|2742 (GLRA2)|2903 (GRIN2A)|2904 (GRIN2B)|2906 (GRIN2D)|3208 (HPCA)|3747 (KCNC2)|3756 (KCNH1)|3762 (KCNJ5)|3788 (KCNS2)|4842 (NOS1)|4923 (NTSR1)|4986 (OPRK1)|4988 (OPRM1)|5581 (PRKCE)|5999 (RGS4)|6331 (SCN5A)|6338 (SCNN1B)|6616 (SNAP25)|6833 (ABCC8)|7070 (THY1)|7223 (TRPC4)|7…
	N	GO|GO.BP	GO:0051239	regulation of multicellular organismal process	7.56378e-12	8.61969e-07	132	116 (ADCYAP1)|284 (ANGPT1)|367 (AR)|478 (ATP1A3)|774 (CACNA1B)|781 (CACNA2D1)|885 (CCK)|1131 (CHRM3)|1141 (CHRNB2)|1149 (CIDEA)|1268 (CNR1)|1392 (CRH)|1393 (CRHBP)|1400 (CRMP1)|1627 (DBN1)|1745 (DLX1)|1813 (DRD2)|1832 (DSP)|1944 (EFNA3)|1946 (EFNA5)|1951 (CELSR3)|2042 (EPHA3)|2048 (EPHB2)|2254 (FGF9)|2281 (FKBP1B)|2587 (GALR1)|2596 (GAP43)|2796 (GNRH1)|2817 (GPC1)|2903 (GRIN2A)|2906 (GRIN2D)|3084…
	N	GO|GO.CC	GO:0045211	postsynaptic membrane	1.22429e-11	1.3952e-06	32	107 (ADCY1)|1131 (CHRM3)|1141 (CHRNB2)|1627 (DBN1)|1759 (DNM1)|1813 (DRD2)|2048 (EPHB2)|2566 (GABRG2)|2742 (GLRA2)|2903 (GRIN2A)|2904 (GRIN2B)|2906 (GRIN2D)|2912 (GRM2)|3747 (KCNC2)|3756 (KCNH1)|4986 (OPRK1)|4988 (OPRM1)|7442 (TRPV1)|8001 (GLRA3)|9177 (HTR3B)|9228 (DLGAP2)|10368 (CACNG3)|10369 (CACNG2)|22941 (SHANK2)|23623 (RUSC1)|27065 (NSG1)|57692 (MAGEE1)|112476 (PRRT2)|386617 (KCTD8)|392862 (…
	N	GO|GO.BP	GO:0051962	positive regulation of nervous system development	2.25921e-11	2.57459e-06	41	116 (ADCYAP1)|1268 (CNR1)|1745 (DLX1)|1813 (DRD2)|1946 (EFNA5)|2042 (EPHA3)|2048 (EPHB2)|2281 (FKBP1B)|3897 (L1CAM)|4674 (NAP1L2)|4804 (NGFR)|4988 (OPRM1)|5063 (PAK3)|5121 (PCP4)|5274 (SERPINI1)|6014 (RIT2)|6092 (ROBO2)|6664 (SOX11)|6857 (SYT1)|6860 (SYT4)|7161 (TP73)|7224 (TRPC5)|9253 (NUMBL)|9362 (CPNE6)|10371 (SEMA3A)|11075 (STMN2)|22941 (SHANK2)|23025 (UNC13A)|26039 (SS18L1)|29993 (PACSIN1)|5…
	N	GO|GO.BP	GO:0051588	regulation of neurotransmitter transport	2.46419e-11	2.80819e-06	21	107 (ADCY1)|1141 (CHRNB2)|1268 (CNR1)|1392 (CRH)|1813 (DRD2)|3350 (HTR1A)|4842 (NOS1)|4923 (NTSR1)|5864 (RAB3A)|5865 (RAB3B)|5999 (RGS4)|6812 (STXBP1)|6853 (SYN1)|6855 (SYP)|6857 (SYT1)|6860 (SYT4)|10814 (CPLX2)|10815 (CPLX1)|23025 (UNC13A)|63908 (NAPB)|79772 (MCTP1)
	N	GO|GO.BP	GO:0034765	regulation of ion transmembrane transport	2.59294e-11	2.95491e-06	38	773 (CACNA1A)|774 (CACNA1B)|781 (CACNA2D1)|1392 (CRH)|1393 (CRHBP)|1612 (DAPK1)|1813 (DRD2)|2048 (EPHB2)|2281 (FKBP1B)|3208 (HPCA)|3747 (KCNC2)|3756 (KCNH1)|3762 (KCNJ5)|3788 (KCNS2)|4842 (NOS1)|4923 (NTSR1)|4986 (OPRK1)|4988 (OPRM1)|5581 (PRKCE)|5999 (RGS4)|6331 (SCN5A)|6833 (ABCC8)|7070 (THY1)|9254 (CACNA2D2)|10021 (HCN4)|10368 (CACNG3)|10369 (CACNG2)|22941 (SHANK2)|23072 (HECW1)|53822 (FXYD7)|…
	N	GO|GO.BP	GO:0015844	monoamine transport	2.8372e-11	3.23328e-06	17	1141 (CHRNB2)|1268 (CNR1)|1392 (CRH)|1813 (DRD2)|3350 (HTR1A)|4842 (NOS1)|4887 (NPY2R)|4986 (OPRK1)|5865 (RAB3B)|6857 (SYT1)|6860 (SYT4)|6861 (SYT5)|7432 (VIP)|51760 (SYT17)|57586 (SYT13)|84258 (SYT3)|148281 (SYT6)
	N	GO|GO.BP	GO:0045666	positive regulation of neuron differentiation	3.8008e-11	4.33139e-06	33	116 (ADCYAP1)|1268 (CNR1)|1745 (DLX1)|1946 (EFNA5)|2042 (EPHA3)|2281 (FKBP1B)|3897 (L1CAM)|4674 (NAP1L2)|4804 (NGFR)|5063 (PAK3)|5121 (PCP4)|5274 (SERPINI1)|6014 (RIT2)|6092 (ROBO2)|6664 (SOX11)|6857 (SYT1)|6860 (SYT4)|7224 (TRPC5)|9362 (CPNE6)|11075 (STMN2)|22941 (SHANK2)|23025 (UNC13A)|26039 (SS18L1)|29993 (PACSIN1)|50937 (CDON)|51760 (SYT17)|57611 (ISLR2)|57699 (CPNE5)|65009 (NDRG4)|84258 (SYT…
	N	GO|GO.BP	GO:0007611	learning or memory	5.84597e-11	6.66206e-06	27	107 (ADCY1)|793 (CALB1)|885 (CCK)|1141 (CHRNB2)|1268 (CNR1)|1392 (CRH)|1393 (CRHBP)|1813 (DRD2)|1816 (DRD5)|2048 (EPHB2)|2334 (AFF2)|2903 (GRIN2A)|2904 (GRIN2B)|4923 (NTSR1)|4986 (OPRK1)|5575 (PRKAR1B)|6616 (SNAP25)|6833 (ABCC8)|6860 (SYT4)|7432 (VIP)|9369 (NRXN3)|10716 (TBR1)|22941 (SHANK2)|26047 (CNTNAP2)|57468 (SLC12A5)|65009 (NDRG4)|100528062 (ARMCX5-GPRASP2)
	N	GO|GO.MF	GO:0015318	inorganic molecular entity transmembrane transporter activity	6.18263e-11	7.04573e-06	54	478 (ATP1A3)|773 (CACNA1A)|774 (CACNA1B)|781 (CACNA2D1)|1141 (CHRNB2)|1261 (CNGA3)|1268 (CNR1)|2281 (FKBP1B)|2566 (GABRG2)|2742 (GLRA2)|2903 (GRIN2A)|2904 (GRIN2B)|2906 (GRIN2D)|3747 (KCNC2)|3756 (KCNH1)|3762 (KCNJ5)|3788 (KCNS2)|4988 (OPRM1)|6331 (SCN5A)|6338 (SCNN1B)|6519 (SLC3A1)|6534 (SLC6A7)|6616 (SNAP25)|6833 (ABCC8)|7223 (TRPC4)|7224 (TRPC5)|7442 (TRPV1)|8001 (GLRA3)|9177 (HTR3B)|9254 (CAC…
	N	GO|GO.BP	GO:0071277	cellular response to calcium ion	6.2799e-11	7.15657e-06	16	107 (ADCY1)|1393 (CRHBP)|3208 (HPCA)|3756 (KCNH1)|6331 (SCN5A)|6857 (SYT1)|6860 (SYT4)|6861 (SYT5)|9362 (CPNE6)|27132 (CPNE7)|51760 (SYT17)|57586 (SYT13)|57699 (CPNE5)|84258 (SYT3)|131034 (CPNE4)|148281 (SYT6)
	N	GO|GO.BP	GO:0050890	cognition	6.49309e-11	7.39953e-06	29	107 (ADCY1)|793 (CALB1)|885 (CCK)|1141 (CHRNB2)|1268 (CNR1)|1392 (CRH)|1393 (CRHBP)|1813 (DRD2)|1816 (DRD5)|2048 (EPHB2)|2334 (AFF2)|2903 (GRIN2A)|2904 (GRIN2B)|4923 (NTSR1)|4986 (OPRK1)|5575 (PRKAR1B)|6616 (SNAP25)|6833 (ABCC8)|6860 (SYT4)|7432 (VIP)|9369 (NRXN3)|10716 (TBR1)|22941 (SHANK2)|26047 (CNTNAP2)|57468 (SLC12A5)|65009 (NDRG4)|139411 (PTCHD1)|152789 (JAKMIP1)|100528062 (ARMCX5-GPRASP2)
	N	GO|GO.MF	GO:0022857	transmembrane transporter activity	6.98157e-11	7.9562e-06	62	478 (ATP1A3)|534 (ATP6V1G2)|773 (CACNA1A)|774 (CACNA1B)|781 (CACNA2D1)|1141 (CHRNB2)|1261 (CNGA3)|1268 (CNR1)|2281 (FKBP1B)|2566 (GABRG2)|2742 (GLRA2)|2903 (GRIN2A)|2904 (GRIN2B)|2906 (GRIN2D)|3747 (KCNC2)|3756 (KCNH1)|3762 (KCNJ5)|3788 (KCNS2)|4988 (OPRM1)|6331 (SCN5A)|6338 (SCNN1B)|6519 (SLC3A1)|6534 (SLC6A7)|6616 (SNAP25)|6833 (ABCC8)|7223 (TRPC4)|7224 (TRPC5)|7442 (TRPV1)|8001 (GLRA3)|9177 (H…
	N	GO|GO.BP	GO:0009653	anatomical structure morphogenesis	7.26239e-11	8.27622e-06	114	58 (ACTA1)|107 (ADCY1)|284 (ANGPT1)|367 (AR)|793 (CALB1)|885 (CCK)|1141 (CHRNB2)|1292 (COL6A2)|1400 (CRMP1)|1690 (COCH)|1745 (DLX1)|1749 (DLX5)|1813 (DRD2)|1832 (DSP)|1944 (EFNA3)|1946 (EFNA5)|1951 (CELSR3)|2046 (EPHA8)|2048 (EPHB2)|2139 (EYA2)|2254 (FGF9)|2596 (GAP43)|2817 (GPC1)|3084 (NRG1)|3756 (KCNH1)|3800 (KIF5C)|3880 (KRT19)|3897 (L1CAM)|3925 (STMN1)|4081 (MAB21L1)|4233 (MET)|4744 (NEFH)|48…
	N	GO|GO.BP	GO:0010976	positive regulation of neuron projection development	8.1897e-11	9.33298e-06	28	116 (ADCYAP1)|1268 (CNR1)|1946 (EFNA5)|2042 (EPHA3)|2281 (FKBP1B)|3897 (L1CAM)|4804 (NGFR)|5063 (PAK3)|5274 (SERPINI1)|6014 (RIT2)|6092 (ROBO2)|6857 (SYT1)|6860 (SYT4)|7224 (TRPC5)|9362 (CPNE6)|11075 (STMN2)|22941 (SHANK2)|23025 (UNC13A)|26039 (SS18L1)|29993 (PACSIN1)|51760 (SYT17)|57611 (ISLR2)|57699 (CPNE5)|65009 (NDRG4)|84258 (SYT3)|91752 (ZNF804A)|257194 (NEGR1)|100528062 (ARMCX5-GPRASP2)
	N	GO|GO.BP	GO:0014046	dopamine secretion	9.7439e-11	1.11041e-05	12	1141 (CHRNB2)|1268 (CNR1)|1813 (DRD2)|4887 (NPY2R)|4986 (OPRK1)|6857 (SYT1)|6860 (SYT4)|6861 (SYT5)|51760 (SYT17)|57586 (SYT13)|84258 (SYT3)|148281 (SYT6)
	N	GO|GO.BP	GO:0014059	regulation of dopamine secretion	9.7439e-11	1.11041e-05	12	1141 (CHRNB2)|1268 (CNR1)|1813 (DRD2)|4887 (NPY2R)|4986 (OPRK1)|6857 (SYT1)|6860 (SYT4)|6861 (SYT5)|51760 (SYT17)|57586 (SYT13)|84258 (SYT3)|148281 (SYT6)
	N	GO|GO.BP	GO:0045595	regulation of cell differentiation	1.35235e-10	1.54114e-05	87	116 (ADCYAP1)|367 (AR)|862 (RUNX1T1)|1141 (CHRNB2)|1268 (CNR1)|1400 (CRMP1)|1627 (DBN1)|1745 (DLX1)|1813 (DRD2)|1946 (EFNA5)|2042 (EPHA3)|2048 (EPHB2)|2254 (FGF9)|2281 (FKBP1B)|2796 (GNRH1)|2817 (GPC1)|3084 (NRG1)|3623 (INHA)|3897 (L1CAM)|4674 (NAP1L2)|4745 (NELL1)|4804 (NGFR)|4842 (NOS1)|4880 (NPPC)|4988 (OPRM1)|5063 (PAK3)|5121 (PCP4)|5274 (SERPINI1)|5999 (RGS4)|6014 (RIT2)|6092 (ROBO2)|6616 (S…
	N	GO|GO.BP	GO:0050433	regulation of catecholamine secretion	1.41101e-10	1.60799e-05	14	1141 (CHRNB2)|1268 (CNR1)|1392 (CRH)|1813 (DRD2)|4887 (NPY2R)|4986 (OPRK1)|6857 (SYT1)|6860 (SYT4)|6861 (SYT5)|7432 (VIP)|51760 (SYT17)|57586 (SYT13)|84258 (SYT3)|148281 (SYT6)
	N	GO|GO.MF	GO:0005215	transporter activity	1.81648e-10	2.07006e-05	68	478 (ATP1A3)|534 (ATP6V1G2)|773 (CACNA1A)|774 (CACNA1B)|781 (CACNA2D1)|1141 (CHRNB2)|1261 (CNGA3)|1268 (CNR1)|2170 (FABP3)|2281 (FKBP1B)|2566 (GABRG2)|2742 (GLRA2)|2903 (GRIN2A)|2904 (GRIN2B)|2906 (GRIN2D)|3747 (KCNC2)|3756 (KCNH1)|3762 (KCNJ5)|3788 (KCNS2)|4988 (OPRM1)|6331 (SCN5A)|6338 (SCNN1B)|6519 (SLC3A1)|6534 (SLC6A7)|6616 (SNAP25)|6833 (ABCC8)|6853 (SYN1)|7223 (TRPC4)|7224 (TRPC5)|7442 (TR…
	N	GO|GO.BP	GO:0015872	dopamine transport	2.03461e-10	2.31864e-05	13	1141 (CHRNB2)|1268 (CNR1)|1813 (DRD2)|4887 (NPY2R)|4986 (OPRK1)|5865 (RAB3B)|6857 (SYT1)|6860 (SYT4)|6861 (SYT5)|51760 (SYT17)|57586 (SYT13)|84258 (SYT3)|148281 (SYT6)
	N	GO|GO.MF	GO:0015075	ion transmembrane transporter activity	2.06581e-10	2.35419e-05	55	478 (ATP1A3)|773 (CACNA1A)|774 (CACNA1B)|781 (CACNA2D1)|1141 (CHRNB2)|1261 (CNGA3)|1268 (CNR1)|2281 (FKBP1B)|2566 (GABRG2)|2742 (GLRA2)|2903 (GRIN2A)|2904 (GRIN2B)|2906 (GRIN2D)|3747 (KCNC2)|3756 (KCNH1)|3762 (KCNJ5)|3788 (KCNS2)|4988 (OPRM1)|6331 (SCN5A)|6338 (SCNN1B)|6519 (SLC3A1)|6534 (SLC6A7)|6616 (SNAP25)|6833 (ABCC8)|7223 (TRPC4)|7224 (TRPC5)|7442 (TRPV1)|8001 (GLRA3)|9177 (HTR3B)|9254 (CAC…
	N	GO|GO.CC	GO:0016020	membrane	2.11002e-10	2.40458e-05	295	107 (ADCY1)|284 (ANGPT1)|367 (AR)|398 (ARHGDIG)|432 (ASGR1)|478 (ATP1A3)|534 (ATP6V1G2)|773 (CACNA1A)|774 (CACNA1B)|781 (CACNA2D1)|794 (CALB2)|956 (ENTPD3)|1005 (CDH7)|1006 (CDH8)|1010 (CDH12)|1131 (CHRM3)|1141 (CHRNB2)|1159 (CKMT1B)|1261 (CNGA3)|1268 (CNR1)|1292 (COL6A2)|1395 (CRHR2)|1534 (CYB561)|1608 (DGKG)|1612 (DAPK1)|1627 (DBN1)|1759 (DNM1)|1813 (DRD2)|1816 (DRD5)|1832 (DSP)|1944 (EFNA3)|19…
	N	GO|GO.BP	GO:0050432	catecholamine secretion	2.24259e-10	2.55566e-05	14	1141 (CHRNB2)|1268 (CNR1)|1392 (CRH)|1813 (DRD2)|4887 (NPY2R)|4986 (OPRK1)|6857 (SYT1)|6860 (SYT4)|6861 (SYT5)|7432 (VIP)|51760 (SYT17)|57586 (SYT13)|84258 (SYT3)|148281 (SYT6)
	N	GO|GO.BP	GO:0098693	regulation of synaptic vesicle cycle	2.46756e-10	2.81203e-05	18	107 (ADCY1)|1141 (CHRNB2)|1268 (CNR1)|1759 (DNM1)|1813 (DRD2)|5575 (PRKAR1B)|5864 (RAB3A)|5865 (RAB3B)|6812 (STXBP1)|6853 (SYN1)|6855 (SYP)|6857 (SYT1)|6860 (SYT4)|8851 (CDK5R1)|8927 (BSN)|10814 (CPLX2)|10815 (CPLX1)|63908 (NAPB)
	N	GO|GO.CC	GO:0098982	GABA-ergic synapse	2.49797e-10	2.84668e-05	15	793 (CALB1)|1268 (CNR1)|1813 (DRD2)|1946 (EFNA5)|2566 (GABRG2)|2596 (GAP43)|3084 (NRG1)|8927 (BSN)|26059 (ERC2)|53942 (CNTN5)|85445 (CNTNAP4)|140679 (SLC32A1)|266727 (MDGA1)|388662 (SLC6A17)|440073 (IQSEC3)
	N	GO|GO.MF	GO:0005544	calcium-dependent phospholipid binding	2.63748e-10	3.00567e-05	13	6857 (SYT1)|6860 (SYT4)|6861 (SYT5)|8447 (DOC2B)|8448 (DOC2A)|9362 (CPNE6)|27132 (CPNE7)|51760 (SYT17)|57586 (SYT13)|57699 (CPNE5)|84258 (SYT3)|131034 (CPNE4)|148281 (SYT6)
	N	GO|GO.BP	GO:0051937	catecholamine transport	3.04446e-10	3.46946e-05	15	1141 (CHRNB2)|1268 (CNR1)|1392 (CRH)|1813 (DRD2)|4887 (NPY2R)|4986 (OPRK1)|5865 (RAB3B)|6857 (SYT1)|6860 (SYT4)|6861 (SYT5)|7432 (VIP)|51760 (SYT17)|57586 (SYT13)|84258 (SYT3)|148281 (SYT6)
	N	GO|GO.BP	GO:0030001	metal ion transport	3.09108e-10	3.5226e-05	53	116 (ADCYAP1)|478 (ATP1A3)|534 (ATP6V1G2)|773 (CACNA1A)|774 (CACNA1B)|781 (CACNA2D1)|1141 (CHRNB2)|1392 (CRH)|1813 (DRD2)|2281 (FKBP1B)|2903 (GRIN2A)|2904 (GRIN2B)|2906 (GRIN2D)|3208 (HPCA)|3747 (KCNC2)|3756 (KCNH1)|3762 (KCNJ5)|3788 (KCNS2)|4842 (NOS1)|4923 (NTSR1)|4986 (OPRK1)|4988 (OPRM1)|5581 (PRKCE)|5999 (RGS4)|6331 (SCN5A)|6338 (SCNN1B)|6616 (SNAP25)|6833 (ABCC8)|7070 (THY1)|7223 (TRPC4)|72…
	N	GO|GO.BP	GO:0019233	sensory perception of pain	3.25839e-10	3.71326e-05	17	116 (ADCYAP1)|885 (CCK)|1141 (CHRNB2)|1268 (CNR1)|2903 (GRIN2A)|2906 (GRIN2D)|4886 (NPY1R)|4887 (NPY2R)|4923 (NTSR1)|4986 (OPRK1)|4988 (OPRM1)|5179 (PENK)|7345 (UCHL1)|7432 (VIP)|7442 (TRPV1)|55800 (SCN3B)|59344 (ALOXE3)
	N	GO|GO.BP	GO:2001023	regulation of response to drug	3.25839e-10	3.71326e-05	17	1141 (CHRNB2)|1268 (CNR1)|1392 (CRH)|1813 (DRD2)|2587 (GALR1)|4233 (MET)|4887 (NPY2R)|4986 (OPRK1)|5865 (RAB3B)|5999 (RGS4)|6857 (SYT1)|6860 (SYT4)|6861 (SYT5)|51760 (SYT17)|57586 (SYT13)|84258 (SYT3)|148281 (SYT6)
	N	GO|GO.BP	GO:0051592	response to calcium ion	3.43513e-10	3.91467e-05	20	107 (ADCY1)|1393 (CRHBP)|2696 (GIPR)|3208 (HPCA)|3756 (KCNH1)|5179 (PENK)|6331 (SCN5A)|6857 (SYT1)|6860 (SYT4)|6861 (SYT5)|9362 (CPNE6)|10369 (CACNG2)|27132 (CPNE7)|51760 (SYT17)|55503 (TRPV6)|57586 (SYT13)|57699 (CPNE5)|84258 (SYT3)|131034 (CPNE4)|148281 (SYT6)
	N	GO|GO.BP	GO:0051648	vesicle localization	3.55409e-10	4.05024e-05	29	107 (ADCY1)|1141 (CHRNB2)|1268 (CNR1)|1759 (DNM1)|1780 (DYNC1I1)|1813 (DRD2)|3800 (KIF5C)|5864 (RAB3A)|6616 (SNAP25)|6812 (STXBP1)|6853 (SYN1)|6855 (SYP)|6857 (SYT1)|6860 (SYT4)|6861 (SYT5)|8224 (SYN3)|8447 (DOC2B)|8448 (DOC2A)|10814 (CPLX2)|10815 (CPLX1)|23025 (UNC13A)|26059 (ERC2)|51760 (SYT17)|57586 (SYT13)|63908 (NAPB)|80128 (TRIM46)|84258 (SYT3)|112476 (PRRT2)|148281 (SYT6)
	N	GO|GO.MF	GO:0000149	SNARE binding	3.81721e-10	4.35009e-05	17	773 (CACNA1A)|1612 (DAPK1)|6616 (SNAP25)|6812 (STXBP1)|6857 (SYT1)|6860 (SYT4)|6861 (SYT5)|8447 (DOC2B)|10814 (CPLX2)|10815 (CPLX1)|23025 (UNC13A)|51760 (SYT17)|57586 (SYT13)|63908 (NAPB)|84258 (SYT3)|112476 (PRRT2)|148281 (SYT6)
	N	GO|GO.CC	GO:0031224	intrinsic component of membrane	4.07789e-10	4.64717e-05	194	107 (ADCY1)|432 (ASGR1)|478 (ATP1A3)|773 (CACNA1A)|774 (CACNA1B)|781 (CACNA2D1)|956 (ENTPD3)|1005 (CDH7)|1006 (CDH8)|1010 (CDH12)|1131 (CHRM3)|1141 (CHRNB2)|1261 (CNGA3)|1268 (CNR1)|1395 (CRHR2)|1534 (CYB561)|1813 (DRD2)|1816 (DRD5)|1944 (EFNA3)|1946 (EFNA5)|1951 (CELSR3)|2042 (EPHA3)|2046 (EPHA8)|2048 (EPHB2)|2281 (FKBP1B)|2566 (GABRG2)|2572 (GAD2)|2587 (GALR1)|2696 (GIPR)|2742 (GLRA2)|2817 (GPC…
	N	GO|GO.BP	GO:0017158	regulation of calcium ion-dependent exocytosis	4.4634e-10	5.08649e-05	17	107 (ADCY1)|1141 (CHRNB2)|1268 (CNR1)|1813 (DRD2)|5864 (RAB3A)|6812 (STXBP1)|6853 (SYN1)|6855 (SYP)|6857 (SYT1)|6860 (SYT4)|6861 (SYT5)|8447 (DOC2B)|8448 (DOC2A)|10814 (CPLX2)|10815 (CPLX1)|55503 (TRPV6)|63908 (NAPB)
	N	GO|GO.BP	GO:0051650	establishment of vesicle localization	4.69994e-10	5.35605e-05	28	107 (ADCY1)|1141 (CHRNB2)|1268 (CNR1)|1759 (DNM1)|1780 (DYNC1I1)|1813 (DRD2)|3800 (KIF5C)|5864 (RAB3A)|6616 (SNAP25)|6812 (STXBP1)|6853 (SYN1)|6855 (SYP)|6857 (SYT1)|6860 (SYT4)|6861 (SYT5)|8447 (DOC2B)|8448 (DOC2A)|10814 (CPLX2)|10815 (CPLX1)|23025 (UNC13A)|26059 (ERC2)|51760 (SYT17)|57586 (SYT13)|63908 (NAPB)|80128 (TRIM46)|84258 (SYT3)|112476 (PRRT2)|148281 (SYT6)
	N	GO|GO.CC	GO:0098563	intrinsic component of synaptic vesicle membrane	5.95396e-10	6.78513e-05	12	4986 (OPRK1)|5864 (RAB3A)|5865 (RAB3B)|6853 (SYN1)|6855 (SYP)|6857 (SYT1)|6860 (SYT4)|22987 (SV2C)|115827 (RAB3C)|132204 (SYNPR)|140679 (SLC32A1)|388662 (SLC6A17)
	N	GO|GO.BP	GO:0010720	positive regulation of cell development	5.99733e-10	6.83455e-05	39	116 (ADCYAP1)|1268 (CNR1)|1745 (DLX1)|1813 (DRD2)|1946 (EFNA5)|2042 (EPHA3)|2048 (EPHB2)|2281 (FKBP1B)|3897 (L1CAM)|4674 (NAP1L2)|4804 (NGFR)|4988 (OPRM1)|5063 (PAK3)|5121 (PCP4)|5274 (SERPINI1)|6014 (RIT2)|6092 (ROBO2)|6664 (SOX11)|6857 (SYT1)|6860 (SYT4)|7161 (TP73)|7224 (TRPC5)|9253 (NUMBL)|9362 (CPNE6)|10371 (SEMA3A)|11075 (STMN2)|22941 (SHANK2)|23025 (UNC13A)|26039 (SS18L1)|29993 (PACSIN1)|5…
	N	GO|GO.BP	GO:0055085	transmembrane transport	6.15504e-10	7.01428e-05	76	478 (ATP1A3)|534 (ATP6V1G2)|773 (CACNA1A)|774 (CACNA1B)|781 (CACNA2D1)|1141 (CHRNB2)|1261 (CNGA3)|1392 (CRH)|1393 (CRHBP)|1612 (DAPK1)|1813 (DRD2)|2048 (EPHB2)|2281 (FKBP1B)|2566 (GABRG2)|2742 (GLRA2)|2903 (GRIN2A)|2904 (GRIN2B)|2906 (GRIN2D)|3208 (HPCA)|3747 (KCNC2)|3756 (KCNH1)|3762 (KCNJ5)|3788 (KCNS2)|4842 (NOS1)|4923 (NTSR1)|4986 (OPRK1)|4988 (OPRM1)|5581 (PRKCE)|5999 (RGS4)|6331 (SCN5A)|633…
	N	GO|GO.CC	GO:0014069	postsynaptic density	7.56308e-10	8.61889e-05	29	107 (ADCY1)|1131 (CHRM3)|1627 (DBN1)|1759 (DNM1)|1813 (DRD2)|2596 (GAP43)|2903 (GRIN2A)|2904 (GRIN2B)|2906 (GRIN2D)|3756 (KCNH1)|4744 (NEFH)|4842 (NOS1)|5063 (PAK3)|6853 (SYN1)|8224 (SYN3)|8851 (CDK5R1)|8927 (BSN)|9228 (DLGAP2)|9758 (FRMPD4)|9829 (DNAJC6)|9912 (ARHGAP44)|10368 (CACNG3)|10369 (CACNG2)|22941 (SHANK2)|23623 (RUSC1)|53335 (BCL11A)|112476 (PRRT2)|440073 (IQSEC3)|642938 (INSYN2)
	N	GO|GO.BP	GO:0034762	regulation of transmembrane transport	8.28815e-10	9.44518e-05	39	773 (CACNA1A)|774 (CACNA1B)|781 (CACNA2D1)|1392 (CRH)|1393 (CRHBP)|1612 (DAPK1)|1813 (DRD2)|2048 (EPHB2)|2281 (FKBP1B)|3208 (HPCA)|3747 (KCNC2)|3756 (KCNH1)|3762 (KCNJ5)|3788 (KCNS2)|4842 (NOS1)|4923 (NTSR1)|4986 (OPRK1)|4988 (OPRM1)|5581 (PRKCE)|5999 (RGS4)|6331 (SCN5A)|6833 (ABCC8)|7070 (THY1)|9254 (CACNA2D2)|9481 (SLC25A27)|10021 (HCN4)|10368 (CACNG3)|10369 (CACNG2)|22941 (SHANK2)|23072 (HECW1…
	N	GO|GO.MF	GO:0017075	syntaxin-1 binding	9.28931e-10	0.000105861	9	1612 (DAPK1)|6616 (SNAP25)|6812 (STXBP1)|6857 (SYT1)|6860 (SYT4)|10814 (CPLX2)|10815 (CPLX1)|23025 (UNC13A)|112476 (PRRT2)
	N	GO|GO.BP	GO:0015696	ammonium transport	9.49471e-10	0.000108202	17	116 (ADCYAP1)|1141 (CHRNB2)|1268 (CNR1)|1392 (CRH)|1813 (DRD2)|3350 (HTR1A)|4842 (NOS1)|4887 (NPY2R)|4986 (OPRK1)|5865 (RAB3B)|6857 (SYT1)|6860 (SYT4)|6861 (SYT5)|51760 (SYT17)|57586 (SYT13)|84258 (SYT3)|148281 (SYT6)
	N	GO|GO.CC	GO:0099572	postsynaptic specialization	9.83606e-10	0.000112092	30	107 (ADCY1)|1131 (CHRM3)|1141 (CHRNB2)|1627 (DBN1)|1759 (DNM1)|1813 (DRD2)|2596 (GAP43)|2903 (GRIN2A)|2904 (GRIN2B)|2906 (GRIN2D)|3756 (KCNH1)|4744 (NEFH)|4842 (NOS1)|5063 (PAK3)|6853 (SYN1)|8224 (SYN3)|8851 (CDK5R1)|8927 (BSN)|9228 (DLGAP2)|9758 (FRMPD4)|9829 (DNAJC6)|9912 (ARHGAP44)|10368 (CACNG3)|10369 (CACNG2)|22941 (SHANK2)|23623 (RUSC1)|53335 (BCL11A)|112476 (PRRT2)|440073 (IQSEC3)|642938 (…
	N	GO|GO.CC	GO:0032279	asymmetric synapse	1.01381e-09	0.000115534	29	107 (ADCY1)|1131 (CHRM3)|1627 (DBN1)|1759 (DNM1)|1813 (DRD2)|2596 (GAP43)|2903 (GRIN2A)|2904 (GRIN2B)|2906 (GRIN2D)|3756 (KCNH1)|4744 (NEFH)|4842 (NOS1)|5063 (PAK3)|6853 (SYN1)|8224 (SYN3)|8851 (CDK5R1)|8927 (BSN)|9228 (DLGAP2)|9758 (FRMPD4)|9829 (DNAJC6)|9912 (ARHGAP44)|10368 (CACNG3)|10369 (CACNG2)|22941 (SHANK2)|23623 (RUSC1)|53335 (BCL11A)|112476 (PRRT2)|440073 (IQSEC3)|642938 (INSYN2)
	N	GO|GO.CC	GO:0098797	plasma membrane protein complex	1.2945e-09	0.000147522	40	478 (ATP1A3)|773 (CACNA1A)|774 (CACNA1B)|781 (CACNA2D1)|1005 (CDH7)|1006 (CDH8)|1010 (CDH12)|1141 (CHRNB2)|2781 (GNAZ)|2903 (GRIN2A)|2904 (GRIN2B)|2906 (GRIN2D)|3623 (INHA)|3645 (INSRR)|3747 (KCNC2)|3756 (KCNH1)|3762 (KCNJ5)|3788 (KCNS2)|3880 (KRT19)|4842 (NOS1)|6331 (SCN5A)|6616 (SNAP25)|6833 (ABCC8)|8001 (GLRA3)|9177 (HTR3B)|9254 (CACNA2D2)|10021 (HCN4)|10368 (CACNG3)|10369 (CACNG2)|22941 (SHAN…
	N	GO|GO.BP	GO:0042493	response to drug	1.37997e-09	0.000157262	57	107 (ADCY1)|116 (ADCYAP1)|1131 (CHRM3)|1141 (CHRNB2)|1268 (CNR1)|1392 (CRH)|1393 (CRHBP)|1813 (DRD2)|1816 (DRD5)|1946 (EFNA5)|2170 (FABP3)|2281 (FKBP1B)|2571 (GAD1)|2572 (GAD2)|2587 (GALR1)|2742 (GLRA2)|2796 (GNRH1)|2903 (GRIN2A)|2904 (GRIN2B)|3208 (HPCA)|3747 (KCNC2)|4233 (MET)|4842 (NOS1)|4880 (NPPC)|4887 (NPY2R)|4923 (NTSR1)|4986 (OPRK1)|4988 (OPRM1)|5179 (PENK)|5228 (PGF)|5581 (PRKCE)|5865 (R…
	N	GO|GO.BP	GO:0010721	negative regulation of cell development	1.55888e-09	0.00017765	29	116 (ADCYAP1)|1400 (CRMP1)|1745 (DLX1)|1946 (EFNA5)|2048 (EPHB2)|2796 (GNRH1)|3084 (NRG1)|4804 (NGFR)|4880 (NPPC)|5999 (RGS4)|6014 (RIT2)|6664 (SOX11)|6833 (ABCC8)|6860 (SYT4)|7070 (THY1)|7161 (TP73)|7224 (TRPC5)|7442 (TRPV1)|8851 (CDK5R1)|9856 (KIAA0319)|10371 (SEMA3A)|11023 (VAX1)|11075 (STMN2)|22876 (INPP5F)|23105 (FSTL4)|53335 (BCL11A)|57715 (SEMA4G)|65078 (RTN4R)|80128 (TRIM46)
	N	GO|GO.BP	GO:0006810	transport	2.02434e-09	0.000230694	180	107 (ADCY1)|116 (ADCYAP1)|284 (ANGPT1)|432 (ASGR1)|478 (ATP1A3)|534 (ATP6V1G2)|773 (CACNA1A)|774 (CACNA1B)|781 (CACNA2D1)|885 (CCK)|1131 (CHRM3)|1141 (CHRNB2)|1149 (CIDEA)|1261 (CNGA3)|1268 (CNR1)|1392 (CRH)|1393 (CRHBP)|1612 (DAPK1)|1759 (DNM1)|1780 (DYNC1I1)|1813 (DRD2)|1832 (DSP)|1946 (EFNA5)|2042 (EPHA3)|2048 (EPHB2)|2139 (EYA2)|2170 (FABP3)|2254 (FGF9)|2281 (FKBP1B)|2566 (GABRG2)|2587 (GALR1…
	N	GO|GO.BP	GO:0051179	localization	2.69158e-09	0.000306732	219	107 (ADCY1)|116 (ADCYAP1)|284 (ANGPT1)|367 (AR)|398 (ARHGDIG)|432 (ASGR1)|478 (ATP1A3)|534 (ATP6V1G2)|773 (CACNA1A)|774 (CACNA1B)|781 (CACNA2D1)|885 (CCK)|1131 (CHRM3)|1141 (CHRNB2)|1149 (CIDEA)|1261 (CNGA3)|1268 (CNR1)|1392 (CRH)|1393 (CRHBP)|1612 (DAPK1)|1627 (DBN1)|1641 (DCX)|1759 (DNM1)|1780 (DYNC1I1)|1813 (DRD2)|1832 (DSP)|1946 (EFNA5)|1951 (CELSR3)|2042 (EPHA3)|2046 (EPHA8)|2048 (EPHB2)|213…
	N	GO|GO.BP	GO:0015893	drug transport	2.86512e-09	0.000326509	23	1141 (CHRNB2)|1268 (CNR1)|1392 (CRH)|1813 (DRD2)|2587 (GALR1)|4887 (NPY2R)|4923 (NTSR1)|4986 (OPRK1)|5865 (RAB3B)|5999 (RGS4)|6857 (SYT1)|6860 (SYT4)|6861 (SYT5)|26034 (IPCEF1)|51760 (SYT17)|57586 (SYT13)|79751 (SLC25A22)|83546 (RTBDN)|84258 (SYT3)|114757 (CYGB)|140679 (SLC32A1)|148281 (SYT6)|388662 (SLC6A17)
	N	GO|GO.BP	GO:0010038	response to metal ion	3.31836e-09	0.000378161	30	58 (ACTA1)|107 (ADCY1)|1261 (CNGA3)|1393 (CRHBP)|1813 (DRD2)|2696 (GIPR)|2742 (GLRA2)|2796 (GNRH1)|3208 (HPCA)|3747 (KCNC2)|3756 (KCNH1)|5179 (PENK)|5599 (MAPK8)|6331 (SCN5A)|6620 (SNCB)|6833 (ABCC8)|6857 (SYT1)|6860 (SYT4)|6861 (SYT5)|9362 (CPNE6)|10369 (CACNG2)|27132 (CPNE7)|51760 (SYT17)|55503 (TRPV6)|57586 (SYT13)|57699 (CPNE5)|84258 (SYT3)|131034 (CPNE4)|148281 (SYT6)|387758 (FIBIN)
	N	GO|GO.BP	GO:2000026	regulation of multicellular organismal development	3.3352e-09	0.000380079	92	116 (ADCYAP1)|367 (AR)|1141 (CHRNB2)|1268 (CNR1)|1400 (CRMP1)|1627 (DBN1)|1745 (DLX1)|1813 (DRD2)|1944 (EFNA3)|1946 (EFNA5)|1951 (CELSR3)|2042 (EPHA3)|2048 (EPHB2)|2254 (FGF9)|2281 (FKBP1B)|2596 (GAP43)|2796 (GNRH1)|2817 (GPC1)|3084 (NRG1)|3623 (INHA)|3897 (L1CAM)|4674 (NAP1L2)|4745 (NELL1)|4804 (NGFR)|4842 (NOS1)|4988 (OPRM1)|5063 (PAK3)|5121 (PCP4)|5228 (PGF)|5274 (SERPINI1)|5999 (RGS4)|6014 (R…
	N	GO|GO.BP	GO:0051961	negative regulation of nervous system development	3.88072e-09	0.000442246	27	116 (ADCYAP1)|1400 (CRMP1)|1745 (DLX1)|2048 (EPHB2)|2796 (GNRH1)|3084 (NRG1)|4804 (NGFR)|6014 (RIT2)|6092 (ROBO2)|6585 (SLIT1)|6664 (SOX11)|6833 (ABCC8)|6860 (SYT4)|7070 (THY1)|7161 (TP73)|7224 (TRPC5)|8851 (CDK5R1)|9856 (KIAA0319)|10371 (SEMA3A)|11023 (VAX1)|11075 (STMN2)|22876 (INPP5F)|23105 (FSTL4)|53335 (BCL11A)|57715 (SEMA4G)|65078 (RTN4R)|80128 (TRIM46)
	N	GO|GO.BP	GO:0007411	axon guidance	4.08865e-09	0.000465942	25	1400 (CRMP1)|1749 (DLX5)|1944 (EFNA3)|1946 (EFNA5)|1951 (CELSR3)|2046 (EPHA8)|2048 (EPHB2)|2596 (GAP43)|2817 (GPC1)|3800 (KIF5C)|3897 (L1CAM)|6092 (ROBO2)|6585 (SLIT1)|8851 (CDK5R1)|9211 (LGI1)|9369 (NRXN3)|10371 (SEMA3A)|10381 (TUBB3)|10716 (TBR1)|11023 (VAX1)|57715 (SEMA4G)|64919 (BCL11B)|90249 (UNC5A)|137970 (UNC5D)|494470 (RNF165)
	N	GO|GO.BP	GO:0051128	regulation of cellular component organization	4.09989e-09	0.000467224	104	116 (ADCYAP1)|284 (ANGPT1)|367 (AR)|885 (CCK)|1006 (CDH8)|1141 (CHRNB2)|1149 (CIDEA)|1268 (CNR1)|1400 (CRMP1)|1627 (DBN1)|1690 (COCH)|1759 (DNM1)|1813 (DRD2)|1946 (EFNA5)|2042 (EPHA3)|2048 (EPHB2)|2281 (FKBP1B)|2596 (GAP43)|2904 (GRIN2B)|3038 (HAS3)|3208 (HPCA)|3897 (L1CAM)|3925 (STMN1)|4233 (MET)|4674 (NAP1L2)|4804 (NGFR)|4842 (NOS1)|5063 (PAK3)|5274 (SERPINI1)|5570 (PKIB)|5581 (PRKCE)|5599 (MAP…
	N	GO|GO.BP	GO:0097485	neuron projection guidance	4.42424e-09	0.000504187	25	1400 (CRMP1)|1749 (DLX5)|1944 (EFNA3)|1946 (EFNA5)|1951 (CELSR3)|2046 (EPHA8)|2048 (EPHB2)|2596 (GAP43)|2817 (GPC1)|3800 (KIF5C)|3897 (L1CAM)|6092 (ROBO2)|6585 (SLIT1)|8851 (CDK5R1)|9211 (LGI1)|9369 (NRXN3)|10371 (SEMA3A)|10381 (TUBB3)|10716 (TBR1)|11023 (VAX1)|57715 (SEMA4G)|64919 (BCL11B)|90249 (UNC5A)|137970 (UNC5D)|494470 (RNF165)
	N	GO|GO.BP	GO:0050789	regulation of biological process	4.49172e-09	0.000511876	347	58 (ACTA1)|107 (ADCY1)|116 (ADCYAP1)|284 (ANGPT1)|367 (AR)|398 (ARHGDIG)|478 (ATP1A3)|534 (ATP6V1G2)|773 (CACNA1A)|774 (CACNA1B)|781 (CACNA2D1)|793 (CALB1)|794 (CALB2)|862 (RUNX1T1)|885 (CCK)|1006 (CDH8)|1114 (CHGB)|1131 (CHRM3)|1141 (CHRNB2)|1149 (CIDEA)|1261 (CNGA3)|1268 (CNR1)|1381 (CRABP1)|1392 (CRH)|1393 (CRHBP)|1395 (CRHR2)|1400 (CRMP1)|1608 (DGKG)|1612 (DAPK1)|1627 (DBN1)|1641 (DCX)|1690 (…
	N	GO|GO.BP	GO:0065007	biological regulation	4.6607e-09	0.000531133	362	58 (ACTA1)|107 (ADCY1)|116 (ADCYAP1)|284 (ANGPT1)|367 (AR)|398 (ARHGDIG)|478 (ATP1A3)|534 (ATP6V1G2)|773 (CACNA1A)|774 (CACNA1B)|781 (CACNA2D1)|793 (CALB1)|794 (CALB2)|862 (RUNX1T1)|885 (CCK)|1006 (CDH8)|1114 (CHGB)|1131 (CHRM3)|1141 (CHRNB2)|1149 (CIDEA)|1261 (CNGA3)|1268 (CNR1)|1381 (CRABP1)|1392 (CRH)|1393 (CRHBP)|1395 (CRHR2)|1400 (CRMP1)|1608 (DGKG)|1612 (DAPK1)|1627 (DBN1)|1641 (DCX)|1690 (…
	N	GO|GO.BP	GO:0051954	positive regulation of amine transport	6.22604e-09	0.000709519	10	885 (CCK)|1141 (CHRNB2)|1813 (DRD2)|4887 (NPY2R)|4923 (NTSR1)|4986 (OPRK1)|5865 (RAB3B)|6812 (STXBP1)|6860 (SYT4)|7432 (VIP)
	N	GO|GO.MF	GO:0005262	calcium channel activity	6.36233e-09	0.000725051	17	773 (CACNA1A)|774 (CACNA1B)|781 (CACNA2D1)|1268 (CNR1)|2281 (FKBP1B)|2903 (GRIN2A)|2904 (GRIN2B)|2906 (GRIN2D)|4988 (OPRM1)|7223 (TRPC4)|7224 (TRPC5)|7442 (TRPV1)|9254 (CACNA2D2)|10368 (CACNG3)|10369 (CACNG2)|55503 (TRPV6)|55799 (CACNA2D3)
	N	GO|GO.BP	GO:0051234	establishment of localization	6.81376e-09	0.000776497	181	107 (ADCY1)|116 (ADCYAP1)|284 (ANGPT1)|432 (ASGR1)|478 (ATP1A3)|534 (ATP6V1G2)|773 (CACNA1A)|774 (CACNA1B)|781 (CACNA2D1)|885 (CCK)|1131 (CHRM3)|1141 (CHRNB2)|1149 (CIDEA)|1261 (CNGA3)|1268 (CNR1)|1392 (CRH)|1393 (CRHBP)|1612 (DAPK1)|1759 (DNM1)|1780 (DYNC1I1)|1813 (DRD2)|1832 (DSP)|1946 (EFNA5)|2042 (EPHA3)|2048 (EPHB2)|2139 (EYA2)|2170 (FABP3)|2254 (FGF9)|2281 (FKBP1B)|2566 (GABRG2)|2587 (GALR1…
	N	GO|GO.BP	GO:0060560	developmental growth involved in morphogenesis	6.83438e-09	0.000778846	23	1946 (EFNA5)|3897 (L1CAM)|6456 (SH3GL2)|6585 (SLIT1)|6857 (SYT1)|6860 (SYT4)|7224 (TRPC5)|8851 (CDK5R1)|9362 (CPNE6)|10371 (SEMA3A)|10439 (OLFM1)|23025 (UNC13A)|23105 (FSTL4)|51760 (SYT17)|53335 (BCL11A)|55897 (MESP1)|57611 (ISLR2)|57699 (CPNE5)|57715 (SEMA4G)|65078 (RTN4R)|80128 (TRIM46)|84258 (SYT3)|342184 (FMN1)
	N	GO|GO.MF	GO:0030276	clathrin binding	8.51604e-09	0.000970488	12	6857 (SYT1)|6860 (SYT4)|6861 (SYT5)|7224 (TRPC5)|9829 (DNAJC6)|9892 (SNAP91)|27065 (NSG1)|51617 (NSG2)|51760 (SYT17)|57586 (SYT13)|84258 (SYT3)|148281 (SYT6)
	N	GO|GO.BP	GO:0045471	response to ethanol	1.04268e-08	0.00118824	17	116 (ADCYAP1)|1141 (CHRNB2)|1268 (CNR1)|1392 (CRH)|1393 (CRHBP)|1813 (DRD2)|2742 (GLRA2)|2796 (GNRH1)|2903 (GRIN2A)|2904 (GRIN2B)|3747 (KCNC2)|4880 (NPPC)|4986 (OPRK1)|4988 (OPRM1)|5179 (PENK)|5581 (PRKCE)|5999 (RGS4)
	N	GO|GO.BP	GO:0048638	regulation of developmental growth	1.10816e-08	0.00126286	28	367 (AR)|1813 (DRD2)|1946 (EFNA5)|2254 (FGF9)|3897 (L1CAM)|4880 (NPPC)|4886 (NPY1R)|5999 (RGS4)|6857 (SYT1)|6860 (SYT4)|7161 (TP73)|7224 (TRPC5)|8851 (CDK5R1)|9254 (CACNA2D2)|9362 (CPNE6)|10371 (SEMA3A)|10409 (BASP1)|10439 (OLFM1)|23025 (UNC13A)|23105 (FSTL4)|51760 (SYT17)|53335 (BCL11A)|57611 (ISLR2)|57699 (CPNE5)|57715 (SEMA4G)|65078 (RTN4R)|80128 (TRIM46)|84258 (SYT3)
	N	GO|GO.BP	GO:1990138	neuron projection extension	1.18934e-08	0.00135537	19	3897 (L1CAM)|6456 (SH3GL2)|6585 (SLIT1)|6857 (SYT1)|6860 (SYT4)|7224 (TRPC5)|8851 (CDK5R1)|9362 (CPNE6)|10371 (SEMA3A)|10439 (OLFM1)|23025 (UNC13A)|51760 (SYT17)|53335 (BCL11A)|57611 (ISLR2)|57699 (CPNE5)|57715 (SEMA4G)|65078 (RTN4R)|80128 (TRIM46)|84258 (SYT3)
	N	GO|GO.BP	GO:1904062	regulation of cation transmembrane transport	1.18978e-08	0.00135588	27	781 (CACNA2D1)|1392 (CRH)|1393 (CRHBP)|1612 (DAPK1)|1813 (DRD2)|2048 (EPHB2)|2281 (FKBP1B)|3208 (HPCA)|3747 (KCNC2)|3788 (KCNS2)|4842 (NOS1)|4923 (NTSR1)|4986 (OPRK1)|4988 (OPRM1)|5581 (PRKCE)|5999 (RGS4)|6331 (SCN5A)|6833 (ABCC8)|7070 (THY1)|10368 (CACNG3)|10369 (CACNG2)|22941 (SHANK2)|23072 (HECW1)|53822 (FXYD7)|55800 (SCN3B)|80333 (KCNIP4)|161253 (REM2)
	N	GO|GO.BP	GO:0023056	positive regulation of signaling	1.25871e-08	0.00143443	81	116 (ADCYAP1)|284 (ANGPT1)|367 (AR)|793 (CALB1)|794 (CALB2)|1141 (CHRNB2)|1268 (CNR1)|1392 (CRH)|1395 (CRHR2)|1749 (DLX5)|1813 (DRD2)|2042 (EPHA3)|2046 (EPHA8)|2048 (EPHB2)|2254 (FGF9)|2587 (GALR1)|2696 (GIPR)|2903 (GRIN2A)|2904 (GRIN2B)|2906 (GRIN2D)|2977 (GUCY1A2)|3084 (NRG1)|3623 (INHA)|3645 (INSRR)|4233 (MET)|4293 (MAP3K9)|4842 (NOS1)|4880 (NPPC)|4923 (NTSR1)|4986 (OPRK1)|4988 (OPRM1)|5063 (P…
	N	GO|GO.BP	GO:0032940	secretion by cell	1.52031e-08	0.00173254	71	107 (ADCY1)|116 (ADCYAP1)|284 (ANGPT1)|773 (CACNA1A)|774 (CACNA1B)|885 (CCK)|1141 (CHRNB2)|1149 (CIDEA)|1268 (CNR1)|1392 (CRH)|1393 (CRHBP)|1813 (DRD2)|1832 (DSP)|1946 (EFNA5)|2281 (FKBP1B)|2587 (GALR1)|2696 (GIPR)|2912 (GRM2)|3350 (HTR1A)|3623 (INHA)|3671 (ISLR)|3747 (KCNC2)|4345 (CD200)|4887 (NPY2R)|4923 (NTSR1)|4986 (OPRK1)|4988 (OPRM1)|5581 (PRKCE)|5657 (PRTN3)|5864 (RAB3A)|5865 (RAB3B)|6616 …
	N	GO|GO.BP	GO:0060627	regulation of vesicle-mediated transport	1.59312e-08	0.00181552	35	107 (ADCY1)|284 (ANGPT1)|1141 (CHRNB2)|1268 (CNR1)|1759 (DNM1)|1813 (DRD2)|2042 (EPHA3)|3208 (HPCA)|5657 (PRTN3)|5864 (RAB3A)|5865 (RAB3B)|6014 (RIT2)|6456 (SH3GL2)|6812 (STXBP1)|6853 (SYN1)|6855 (SYP)|6857 (SYT1)|6860 (SYT4)|6861 (SYT5)|7447 (VSNL1)|8447 (DOC2B)|8448 (DOC2A)|9829 (DNAJC6)|9892 (SNAP91)|9912 (ARHGAP44)|10814 (CPLX2)|10815 (CPLX1)|22876 (INPP5F)|55503 (TRPV6)|55512 (SMPD3)|63908 (…
	N	GO|GO.CC	GO:0030426	growth cone	1.78433e-08	0.00203343	19	1268 (CNR1)|1627 (DBN1)|2596 (GAP43)|3800 (KIF5C)|3897 (L1CAM)|6616 (SNAP25)|7070 (THY1)|7224 (TRPC5)|7786 (MAP3K12)|8851 (CDK5R1)|10409 (BASP1)|10439 (OLFM1)|11075 (STMN2)|22941 (SHANK2)|23467 (NPTXR)|26059 (ERC2)|50861 (STMN3)|65078 (RTN4R)|91752 (ZNF804A)
	N	GO|GO.BP	GO:0050768	negative regulation of neurogenesis	1.83945e-08	0.00209624	25	116 (ADCYAP1)|1400 (CRMP1)|1745 (DLX1)|2048 (EPHB2)|2796 (GNRH1)|3084 (NRG1)|4804 (NGFR)|6014 (RIT2)|6664 (SOX11)|6833 (ABCC8)|6860 (SYT4)|7070 (THY1)|7161 (TP73)|7224 (TRPC5)|8851 (CDK5R1)|9856 (KIAA0319)|10371 (SEMA3A)|11023 (VAX1)|11075 (STMN2)|22876 (INPP5F)|23105 (FSTL4)|53335 (BCL11A)|57715 (SEMA4G)|65078 (RTN4R)|80128 (TRIM46)
	N	GO|GO.BP	GO:0050803	regulation of synapse structure or activity	1.85237e-08	0.00211097	22	1006 (CDH8)|1141 (CHRNB2)|1759 (DNM1)|1813 (DRD2)|1946 (EFNA5)|2048 (EPHB2)|2596 (GAP43)|2904 (GRIN2B)|5063 (PAK3)|6092 (ROBO2)|6585 (SLIT1)|8851 (CDK5R1)|9758 (FRMPD4)|9912 (ARHGAP44)|26280 (IL1RAPL2)|84628 (NTNG2)|85445 (CNTNAP4)|91752 (ZNF804A)|147381 (CBLN2)|158038 (LINGO2)|266727 (MDGA1)|100528062 (ARMCX5-GPRASP2)
	N	GO|GO.BP	GO:0006865	amino acid transport	1.88189e-08	0.0021446	17	885 (CCK)|2912 (GRM2)|4923 (NTSR1)|5864 (RAB3A)|5999 (RGS4)|6519 (SLC3A1)|6534 (SLC6A7)|6812 (STXBP1)|6857 (SYT1)|6860 (SYT4)|7223 (TRPC4)|7442 (TRPV1)|55117 (SLC6A15)|57709 (SLC7A14)|79751 (SLC25A22)|140679 (SLC32A1)|388662 (SLC6A17)
	N	GO|GO.CC	GO:0030427	site of polarized growth	2.17522e-08	0.00247888	19	1268 (CNR1)|1627 (DBN1)|2596 (GAP43)|3800 (KIF5C)|3897 (L1CAM)|6616 (SNAP25)|7070 (THY1)|7224 (TRPC5)|7786 (MAP3K12)|8851 (CDK5R1)|10409 (BASP1)|10439 (OLFM1)|11075 (STMN2)|22941 (SHANK2)|23467 (NPTXR)|26059 (ERC2)|50861 (STMN3)|65078 (RTN4R)|91752 (ZNF804A)
	N	GO|GO.BP	GO:0010647	positive regulation of cell communication	2.28123e-08	0.00259969	80	116 (ADCYAP1)|284 (ANGPT1)|367 (AR)|793 (CALB1)|794 (CALB2)|1141 (CHRNB2)|1268 (CNR1)|1392 (CRH)|1395 (CRHR2)|1749 (DLX5)|1813 (DRD2)|2042 (EPHA3)|2046 (EPHA8)|2048 (EPHB2)|2254 (FGF9)|2587 (GALR1)|2696 (GIPR)|2903 (GRIN2A)|2904 (GRIN2B)|2906 (GRIN2D)|2977 (GUCY1A2)|3084 (NRG1)|3623 (INHA)|3645 (INSRR)|4233 (MET)|4293 (MAP3K9)|4842 (NOS1)|4880 (NPPC)|4923 (NTSR1)|4986 (OPRK1)|4988 (OPRM1)|5063 (P…
	N	GO|GO.BP	GO:0017157	regulation of exocytosis	2.3514e-08	0.00267965	21	107 (ADCY1)|1141 (CHRNB2)|1268 (CNR1)|1813 (DRD2)|5864 (RAB3A)|5865 (RAB3B)|6812 (STXBP1)|6853 (SYN1)|6855 (SYP)|6857 (SYT1)|6860 (SYT4)|6861 (SYT5)|7447 (VSNL1)|8447 (DOC2B)|8448 (DOC2A)|10814 (CPLX2)|10815 (CPLX1)|55503 (TRPV6)|55512 (SMPD3)|63908 (NAPB)|115827 (RAB3C)
	N	GO|GO.BP	GO:0050793	regulation of developmental process	2.41451e-08	0.00275157	106	116 (ADCYAP1)|367 (AR)|862 (RUNX1T1)|1141 (CHRNB2)|1268 (CNR1)|1400 (CRMP1)|1627 (DBN1)|1690 (COCH)|1745 (DLX1)|1813 (DRD2)|1944 (EFNA3)|1946 (EFNA5)|1951 (CELSR3)|2042 (EPHA3)|2048 (EPHB2)|2254 (FGF9)|2281 (FKBP1B)|2596 (GAP43)|2796 (GNRH1)|2817 (GPC1)|3084 (NRG1)|3623 (INHA)|3897 (L1CAM)|4674 (NAP1L2)|4745 (NELL1)|4804 (NGFR)|4842 (NOS1)|4880 (NPPC)|4886 (NPY1R)|4988 (OPRM1)|5063 (PAK3)|5121 (P…
	N	GO|GO.BP	GO:0007218	neuropeptide signaling pathway	2.41619e-08	0.0027535	15	116 (ADCYAP1)|2587 (GALR1)|2742 (GLRA2)|2834 (PRLHR)|4886 (NPY1R)|4887 (NPY2R)|4923 (NTSR1)|4986 (OPRK1)|4988 (OPRM1)|5179 (PENK)|6752 (SSTR2)|6866 (TAC3)|8001 (GLRA3)|11248 (NXPH3)|11249 (NXPH2)
	N	GO|GO.BP	GO:0045597	positive regulation of cell differentiation	2.43838e-08	0.00277878	53	116 (ADCYAP1)|367 (AR)|1268 (CNR1)|1745 (DLX1)|1813 (DRD2)|1946 (EFNA5)|2042 (EPHA3)|2048 (EPHB2)|2281 (FKBP1B)|2817 (GPC1)|3084 (NRG1)|3897 (L1CAM)|4674 (NAP1L2)|4745 (NELL1)|4804 (NGFR)|4880 (NPPC)|4988 (OPRM1)|5063 (PAK3)|5121 (PCP4)|5274 (SERPINI1)|6014 (RIT2)|6092 (ROBO2)|6664 (SOX11)|6857 (SYT1)|6860 (SYT4)|7161 (TP73)|7224 (TRPC5)|7704 (ZBTB16)|9253 (NUMBL)|9362 (CPNE6)|10371 (SEMA3A)|1043…
	N	GO|GO.MF	GO:0043167	ion binding	2.7051e-08	0.00308273	205	58 (ACTA1)|107 (ADCY1)|367 (AR)|432 (ASGR1)|478 (ATP1A3)|773 (CACNA1A)|774 (CACNA1B)|781 (CACNA2D1)|793 (CALB1)|794 (CALB2)|862 (RUNX1T1)|956 (ENTPD3)|1005 (CDH7)|1006 (CDH8)|1010 (CDH12)|1131 (CHRM3)|1141 (CHRNB2)|1159 (CKMT1B)|1261 (CNGA3)|1381 (CRABP1)|1534 (CYB561)|1608 (DGKG)|1612 (DAPK1)|1759 (DNM1)|1813 (DRD2)|1816 (DRD5)|1951 (CELSR3)|2042 (EPHA3)|2046 (EPHA8)|2048 (EPHB2)|2139 (EYA2)|217…
	N	GO|GO.BP	GO:0046879	hormone secretion	2.83747e-08	0.00323358	26	116 (ADCYAP1)|773 (CACNA1A)|1268 (CNR1)|1392 (CRH)|1393 (CRHBP)|1813 (DRD2)|1946 (EFNA5)|2281 (FKBP1B)|2587 (GALR1)|2696 (GIPR)|3350 (HTR1A)|3623 (INHA)|3747 (KCNC2)|4986 (OPRK1)|5581 (PRKCE)|6616 (SNAP25)|6664 (SOX11)|6833 (ABCC8)|7425 (VGF)|7432 (VIP)|7447 (VSNL1)|8447 (DOC2B)|9254 (CACNA2D2)|10815 (CPLX1)|55512 (SMPD3)|114897 (C1QTNF1)
	N	GO|GO.BP	GO:0051716	cellular response to stimulus	2.87399e-08	0.0032752	237	58 (ACTA1)|107 (ADCY1)|116 (ADCYAP1)|284 (ANGPT1)|367 (AR)|398 (ARHGDIG)|432 (ASGR1)|478 (ATP1A3)|534 (ATP6V1G2)|773 (CACNA1A)|781 (CACNA2D1)|793 (CALB1)|885 (CCK)|1114 (CHGB)|1131 (CHRM3)|1141 (CHRNB2)|1149 (CIDEA)|1261 (CNGA3)|1268 (CNR1)|1381 (CRABP1)|1392 (CRH)|1393 (CRHBP)|1395 (CRHR2)|1608 (DGKG)|1612 (DAPK1)|1641 (DCX)|1745 (DLX1)|1749 (DLX5)|1759 (DNM1)|1813 (DRD2)|1816 (DRD5)|1944 (EFNA3…
	N	GO|GO.BP	GO:0007215	glutamate receptor signaling pathway	2.99829e-08	0.00341685	14	1392 (CRH)|1393 (CRHBP)|1612 (DAPK1)|2048 (EPHB2)|2903 (GRIN2A)|2904 (GRIN2B)|2906 (GRIN2D)|2912 (GRM2)|4988 (OPRM1)|8851 (CDK5R1)|10368 (CACNG3)|10369 (CACNG2)|22941 (SHANK2)|23025 (UNC13A)
	N	GO|GO.BP	GO:0048588	developmental cell growth	3.01971e-08	0.00344126	22	1946 (EFNA5)|3897 (L1CAM)|5999 (RGS4)|6456 (SH3GL2)|6585 (SLIT1)|6857 (SYT1)|6860 (SYT4)|7224 (TRPC5)|8851 (CDK5R1)|9362 (CPNE6)|10371 (SEMA3A)|10439 (OLFM1)|23025 (UNC13A)|23105 (FSTL4)|51760 (SYT17)|53335 (BCL11A)|57611 (ISLR2)|57699 (CPNE5)|57715 (SEMA4G)|65078 (RTN4R)|80128 (TRIM46)|84258 (SYT3)
	N	GO|GO.BP	GO:0030900	forebrain development	3.41251e-08	0.00388889	29	116 (ADCYAP1)|1141 (CHRNB2)|1392 (CRH)|1745 (DLX1)|1749 (DLX5)|1813 (DRD2)|2048 (EPHB2)|3084 (NRG1)|3747 (KCNC2)|6092 (ROBO2)|6331 (SCN5A)|6585 (SLIT1)|6752 (SSTR2)|8851 (CDK5R1)|9253 (NUMBL)|10371 (SEMA3A)|10716 (TBR1)|23314 (SATB2)|26038 (CHD5)|26047 (CNTNAP2)|26468 (LHX6)|50937 (CDON)|57045 (TWSG1)|63974 (NEUROD6)|64919 (BCL11B)|65078 (RTN4R)|139411 (PTCHD1)|140679 (SLC32A1)|152789 (JAKMIP1)
	N	GO|GO.BP	GO:0046928	regulation of neurotransmitter secretion	3.59216e-08	0.00409363	15	107 (ADCY1)|1141 (CHRNB2)|1268 (CNR1)|1813 (DRD2)|5864 (RAB3A)|6812 (STXBP1)|6853 (SYN1)|6855 (SYP)|6857 (SYT1)|6860 (SYT4)|10814 (CPLX2)|10815 (CPLX1)|23025 (UNC13A)|63908 (NAPB)|79772 (MCTP1)
	N	GO|GO.BP	GO:1903859	regulation of dendrite extension	3.72598e-08	0.00424612	8	6857 (SYT1)|6860 (SYT4)|9362 (CPNE6)|23025 (UNC13A)|51760 (SYT17)|53335 (BCL11A)|57699 (CPNE5)|84258 (SYT3)
	N	GO|GO.MF	GO:0015085	calcium ion transmembrane transporter activity	4.1074e-08	0.00468079	17	773 (CACNA1A)|774 (CACNA1B)|781 (CACNA2D1)|1268 (CNR1)|2281 (FKBP1B)|2903 (GRIN2A)|2904 (GRIN2B)|2906 (GRIN2D)|4988 (OPRM1)|7223 (TRPC4)|7224 (TRPC5)|7442 (TRPV1)|9254 (CACNA2D2)|10368 (CACNG3)|10369 (CACNG2)|55503 (TRPV6)|55799 (CACNA2D3)
	N	GO|GO.BP	GO:0060078	regulation of postsynaptic membrane potential	4.1074e-08	0.00468079	17	116 (ADCYAP1)|1141 (CHRNB2)|1813 (DRD2)|2566 (GABRG2)|2742 (GLRA2)|2903 (GRIN2A)|2904 (GRIN2B)|2906 (GRIN2D)|4887 (NPY2R)|4923 (NTSR1)|4988 (OPRM1)|5999 (RGS4)|7442 (TRPV1)|8001 (GLRA3)|22941 (SHANK2)|56853 (CELF4)|642938 (INSYN2)
	N	GO|GO.MF	GO:0005509	calcium ion binding	4.83448e-08	0.00550937	42	774 (CACNA1B)|793 (CALB1)|794 (CALB2)|1005 (CDH7)|1006 (CDH8)|1010 (CDH12)|1608 (DGKG)|1951 (CELSR3)|3208 (HPCA)|4745 (NELL1)|5121 (PCP4)|6585 (SLIT1)|6620 (SNCB)|6857 (SYT1)|6860 (SYT4)|6861 (SYT5)|7062 (TCHH)|7447 (VSNL1)|8447 (DOC2B)|8448 (DOC2A)|8851 (CDK5R1)|9362 (CPNE6)|10518 (CIB2)|23025 (UNC13A)|23105 (FSTL4)|51760 (SYT17)|56134 (PCDHAC2)|56136 (PCDHA13)|56145 (PCDHA3)|56147 (PCDHA1)|5758…
	N	GO|GO.BP	GO:0007626	locomotory behavior	4.9532e-08	0.00564466	20	774 (CACNA1B)|793 (CALB1)|1141 (CHRNB2)|1392 (CRH)|1813 (DRD2)|2571 (GAD1)|2906 (GRIN2D)|3084 (NRG1)|4886 (NPY1R)|4887 (NPY2R)|4923 (NTSR1)|4986 (OPRK1)|4988 (OPRM1)|5179 (PENK)|5581 (PRKCE)|6616 (SNAP25)|7345 (UCHL1)|7545 (ZIC1)|22876 (INPP5F)|257194 (NEGR1)
	N	GO|GO.BP	GO:0046903	secretion	4.95596e-08	0.00564782	74	107 (ADCY1)|116 (ADCYAP1)|284 (ANGPT1)|773 (CACNA1A)|774 (CACNA1B)|885 (CCK)|1131 (CHRM3)|1141 (CHRNB2)|1149 (CIDEA)|1268 (CNR1)|1392 (CRH)|1393 (CRHBP)|1813 (DRD2)|1832 (DSP)|1946 (EFNA5)|2281 (FKBP1B)|2587 (GALR1)|2696 (GIPR)|2912 (GRM2)|3084 (NRG1)|3350 (HTR1A)|3623 (INHA)|3671 (ISLR)|3747 (KCNC2)|4345 (CD200)|4887 (NPY2R)|4923 (NTSR1)|4986 (OPRK1)|4988 (OPRM1)|5581 (PRKCE)|5657 (PRTN3)|5864 (…
	N	GO|GO.BP	GO:0007612	learning	5.08661e-08	0.0057967	17	885 (CCK)|1141 (CHRNB2)|1392 (CRH)|1813 (DRD2)|1816 (DRD5)|2048 (EPHB2)|2903 (GRIN2A)|4923 (NTSR1)|4986 (OPRK1)|6616 (SNAP25)|6833 (ABCC8)|9369 (NRXN3)|10716 (TBR1)|22941 (SHANK2)|26047 (CNTNAP2)|57468 (SLC12A5)|65009 (NDRG4)
	N	GO|GO.BP	GO:0050807	regulation of synapse organization	5.41873e-08	0.00617518	21	1006 (CDH8)|1141 (CHRNB2)|1813 (DRD2)|1946 (EFNA5)|2048 (EPHB2)|2596 (GAP43)|2904 (GRIN2B)|5063 (PAK3)|6092 (ROBO2)|6585 (SLIT1)|8851 (CDK5R1)|9758 (FRMPD4)|9912 (ARHGAP44)|26280 (IL1RAPL2)|84628 (NTNG2)|85445 (CNTNAP4)|91752 (ZNF804A)|147381 (CBLN2)|158038 (LINGO2)|266727 (MDGA1)|100528062 (ARMCX5-GPRASP2)
	N	GO|GO.BP	GO:0009914	hormone transport	5.43268e-08	0.00619108	26	116 (ADCYAP1)|773 (CACNA1A)|1268 (CNR1)|1392 (CRH)|1393 (CRHBP)|1813 (DRD2)|1946 (EFNA5)|2281 (FKBP1B)|2587 (GALR1)|2696 (GIPR)|3350 (HTR1A)|3623 (INHA)|3747 (KCNC2)|4986 (OPRK1)|5581 (PRKCE)|6616 (SNAP25)|6664 (SOX11)|6833 (ABCC8)|7425 (VGF)|7432 (VIP)|7447 (VSNL1)|8447 (DOC2B)|9254 (CACNA2D2)|10815 (CPLX1)|55512 (SMPD3)|114897 (C1QTNF1)
	N	GO|GO.BP	GO:2000300	regulation of synaptic vesicle exocytosis	5.47379e-08	0.00623793	13	107 (ADCY1)|1141 (CHRNB2)|1268 (CNR1)|1813 (DRD2)|5864 (RAB3A)|6812 (STXBP1)|6853 (SYN1)|6855 (SYP)|6857 (SYT1)|6860 (SYT4)|10814 (CPLX2)|10815 (CPLX1)|63908 (NAPB)
	N	GO|GO.BP	GO:0097484	dendrite extension	5.69303e-08	0.00648778	9	6456 (SH3GL2)|6857 (SYT1)|6860 (SYT4)|9362 (CPNE6)|23025 (UNC13A)|51760 (SYT17)|53335 (BCL11A)|57699 (CPNE5)|84258 (SYT3)
	N	GO|GO.BP	GO:0015850	organic hydroxy compound transport	6.07272e-08	0.00692047	23	1141 (CHRNB2)|1268 (CNR1)|1392 (CRH)|1813 (DRD2)|2587 (GALR1)|3350 (HTR1A)|4842 (NOS1)|4887 (NPY2R)|4986 (OPRK1)|5865 (RAB3B)|6857 (SYT1)|6860 (SYT4)|6861 (SYT5)|7432 (VIP)|10998 (SLC27A5)|51760 (SYT17)|57586 (SYT13)|84258 (SYT3)|114134 (SLC2A13)|114879 (OSBPL5)|114897 (C1QTNF1)|148281 (SYT6)|201780 (SLC10A4)
	N	GO|GO.BP	GO:0015672	monovalent inorganic cation transport	6.20376e-08	0.0070698	35	116 (ADCYAP1)|478 (ATP1A3)|534 (ATP6V1G2)|1813 (DRD2)|3747 (KCNC2)|3756 (KCNH1)|3762 (KCNJ5)|3788 (KCNS2)|4842 (NOS1)|4986 (OPRK1)|5581 (PRKCE)|5999 (RGS4)|6331 (SCN5A)|6338 (SCNN1B)|6616 (SNAP25)|6833 (ABCC8)|7432 (VIP)|9481 (SLC25A27)|10021 (HCN4)|23072 (HECW1)|51305 (KCNK9)|53822 (FXYD7)|55117 (SLC6A15)|55800 (SCN3B)|56479 (KCNQ5)|57468 (SLC12A5)|57582 (KCNT1)|79751 (SLC25A22)|80333 (KCNIP4)|9…
	N	GO|GO.BP	GO:0099565	chemical synaptic transmission, postsynaptic	6.7485e-08	0.00769059	15	1141 (CHRNB2)|1813 (DRD2)|2742 (GLRA2)|2903 (GRIN2A)|2904 (GRIN2B)|2906 (GRIN2D)|4887 (NPY2R)|4923 (NTSR1)|4988 (OPRM1)|5999 (RGS4)|7442 (TRPV1)|8001 (GLRA3)|22941 (SHANK2)|56853 (CELF4)|642938 (INSYN2)
	N	GO|GO.BP	GO:2001257	regulation of cation channel activity	7.37618e-08	0.00840589	18	781 (CACNA2D1)|1392 (CRH)|1393 (CRHBP)|1612 (DAPK1)|1813 (DRD2)|2048 (EPHB2)|2281 (FKBP1B)|3208 (HPCA)|3747 (KCNC2)|3788 (KCNS2)|4842 (NOS1)|4923 (NTSR1)|4988 (OPRM1)|6833 (ABCC8)|10368 (CACNG3)|10369 (CACNG2)|22941 (SHANK2)|161253 (REM2)
	N	GO|GO.BP	GO:0060359	response to ammonium ion	7.54889e-08	0.00860272	16	1131 (CHRM3)|1141 (CHRNB2)|1268 (CNR1)|1392 (CRH)|1393 (CRHBP)|1813 (DRD2)|1816 (DRD5)|2566 (GABRG2)|3747 (KCNC2)|4986 (OPRK1)|4988 (OPRM1)|5179 (PENK)|5581 (PRKCE)|5999 (RGS4)|8851 (CDK5R1)|85397 (RGS8)
	N	GO|GO.BP	GO:0006813	potassium ion transport	7.63075e-08	0.008696	22	116 (ADCYAP1)|478 (ATP1A3)|1813 (DRD2)|3747 (KCNC2)|3756 (KCNH1)|3762 (KCNJ5)|3788 (KCNS2)|4842 (NOS1)|4986 (OPRK1)|5999 (RGS4)|6616 (SNAP25)|6833 (ABCC8)|7432 (VIP)|10021 (HCN4)|51305 (KCNK9)|56479 (KCNQ5)|57468 (SLC12A5)|57582 (KCNT1)|80333 (KCNIP4)|90134 (KCNH7)|170850 (KCNG3)|348980 (HCN1)
	N	GO|GO.BP	GO:0032412	regulation of ion transmembrane transporter activity	7.63075e-08	0.008696	22	781 (CACNA2D1)|1392 (CRH)|1393 (CRHBP)|1612 (DAPK1)|1813 (DRD2)|2048 (EPHB2)|2281 (FKBP1B)|3208 (HPCA)|3747 (KCNC2)|3788 (KCNS2)|4842 (NOS1)|4923 (NTSR1)|4988 (OPRM1)|5581 (PRKCE)|6833 (ABCC8)|10368 (CACNG3)|10369 (CACNG2)|22941 (SHANK2)|23072 (HECW1)|53822 (FXYD7)|55800 (SCN3B)|161253 (REM2)
	N	GO|GO.BP	GO:0032409	regulation of transporter activity	8.66902e-08	0.00987921	23	781 (CACNA2D1)|1392 (CRH)|1393 (CRHBP)|1612 (DAPK1)|1813 (DRD2)|2048 (EPHB2)|2281 (FKBP1B)|3208 (HPCA)|3747 (KCNC2)|3788 (KCNS2)|4842 (NOS1)|4923 (NTSR1)|4988 (OPRM1)|5581 (PRKCE)|6833 (ABCC8)|9143 (SYNGR3)|10368 (CACNG3)|10369 (CACNG2)|22941 (SHANK2)|23072 (HECW1)|53822 (FXYD7)|55800 (SCN3B)|161253 (REM2)
	N	GO|GO.BP	GO:0046883	regulation of hormone secretion	9.29818e-08	0.0105962	23	116 (ADCYAP1)|773 (CACNA1A)|1268 (CNR1)|1392 (CRH)|1393 (CRHBP)|1813 (DRD2)|1946 (EFNA5)|2281 (FKBP1B)|2587 (GALR1)|2696 (GIPR)|3350 (HTR1A)|3623 (INHA)|3747 (KCNC2)|4986 (OPRK1)|5581 (PRKCE)|6616 (SNAP25)|6664 (SOX11)|6833 (ABCC8)|7432 (VIP)|7447 (VSNL1)|8447 (DOC2B)|9254 (CACNA2D2)|114897 (C1QTNF1)
	N	GO|GO.BP	GO:0007188	adenylate cyclase-modulating G protein-coupled receptor signaling pathway	9.42963e-08	0.010746	21	107 (ADCY1)|116 (ADCYAP1)|1131 (CHRM3)|1268 (CNR1)|1395 (CRHR2)|1813 (DRD2)|1816 (DRD5)|2587 (GALR1)|2781 (GNAZ)|2912 (GRM2)|3350 (HTR1A)|4842 (NOS1)|4886 (NPY1R)|4887 (NPY2R)|4986 (OPRK1)|4988 (OPRM1)|6014 (RIT2)|6752 (SSTR2)|7432 (VIP)|59350 (RXFP1)|112609 (MRAP2)
	N	GO|GO.BP	GO:0007416	synapse assembly	9.78438e-08	0.0111503	18	1141 (CHRNB2)|1813 (DRD2)|1946 (EFNA5)|2048 (EPHB2)|2596 (GAP43)|3084 (NRG1)|6092 (ROBO2)|6585 (SLIT1)|8927 (BSN)|22941 (SHANK2)|26280 (IL1RAPL2)|53942 (CNTN5)|54549 (SDK2)|84628 (NTNG2)|147381 (CBLN2)|158038 (LINGO2)|266727 (MDGA1)|100528062 (ARMCX5-GPRASP2)
	N	GO|GO.BP	GO:0031346	positive regulation of cell projection organization	1.03959e-07	0.0118472	28	116 (ADCYAP1)|1268 (CNR1)|1946 (EFNA5)|2042 (EPHA3)|2281 (FKBP1B)|3897 (L1CAM)|4804 (NGFR)|5063 (PAK3)|5274 (SERPINI1)|6014 (RIT2)|6092 (ROBO2)|6857 (SYT1)|6860 (SYT4)|7224 (TRPC5)|9362 (CPNE6)|11075 (STMN2)|22941 (SHANK2)|23025 (UNC13A)|26039 (SS18L1)|29993 (PACSIN1)|51760 (SYT17)|57611 (ISLR2)|57699 (CPNE5)|65009 (NDRG4)|84258 (SYT3)|91752 (ZNF804A)|257194 (NEGR1)|100528062 (ARMCX5-GPRASP2)
	N	GO|GO.BP	GO:1903305	regulation of regulated secretory pathway	1.04369e-07	0.0118939	17	107 (ADCY1)|1141 (CHRNB2)|1268 (CNR1)|1813 (DRD2)|5864 (RAB3A)|6812 (STXBP1)|6853 (SYN1)|6855 (SYP)|6857 (SYT1)|6860 (SYT4)|6861 (SYT5)|8447 (DOC2B)|8448 (DOC2A)|10814 (CPLX2)|10815 (CPLX1)|55503 (TRPV6)|63908 (NAPB)
	N	GO|GO.BP	GO:1902803	regulation of synaptic vesicle transport	1.15054e-07	0.0131116	13	107 (ADCY1)|1141 (CHRNB2)|1268 (CNR1)|1813 (DRD2)|5864 (RAB3A)|6812 (STXBP1)|6853 (SYN1)|6855 (SYP)|6857 (SYT1)|6860 (SYT4)|10814 (CPLX2)|10815 (CPLX1)|63908 (NAPB)
	N	GO|GO.BP	GO:0022898	regulation of transmembrane transporter activity	1.2733e-07	0.0145106	22	781 (CACNA2D1)|1392 (CRH)|1393 (CRHBP)|1612 (DAPK1)|1813 (DRD2)|2048 (EPHB2)|2281 (FKBP1B)|3208 (HPCA)|3747 (KCNC2)|3788 (KCNS2)|4842 (NOS1)|4923 (NTSR1)|4988 (OPRM1)|5581 (PRKCE)|6833 (ABCC8)|10368 (CACNG3)|10369 (CACNG2)|22941 (SHANK2)|23072 (HECW1)|53822 (FXYD7)|55800 (SCN3B)|161253 (REM2)
	N	GO|GO.BP	GO:0007165	signal transduction	1.37829e-07	0.015707	198	107 (ADCY1)|116 (ADCYAP1)|284 (ANGPT1)|367 (AR)|398 (ARHGDIG)|534 (ATP6V1G2)|885 (CCK)|1114 (CHGB)|1131 (CHRM3)|1141 (CHRNB2)|1149 (CIDEA)|1261 (CNGA3)|1268 (CNR1)|1381 (CRABP1)|1392 (CRH)|1393 (CRHBP)|1395 (CRHR2)|1608 (DGKG)|1612 (DAPK1)|1641 (DCX)|1745 (DLX1)|1749 (DLX5)|1759 (DNM1)|1813 (DRD2)|1816 (DRD5)|1944 (EFNA3)|1946 (EFNA5)|1951 (CELSR3)|2042 (EPHA3)|2046 (EPHA8)|2048 (EPHB2)|2139 (EYA…
	N	GO|GO.BP	GO:0044057	regulation of system process	1.39974e-07	0.0159514	36	478 (ATP1A3)|774 (CACNA1B)|781 (CACNA2D1)|885 (CCK)|1131 (CHRM3)|1392 (CRH)|1393 (CRHBP)|1813 (DRD2)|1832 (DSP)|2281 (FKBP1B)|2587 (GALR1)|2903 (GRIN2A)|2906 (GRIN2D)|3623 (INHA)|3762 (KCNJ5)|4842 (NOS1)|4880 (NPPC)|4887 (NPY2R)|4923 (NTSR1)|4986 (OPRK1)|4988 (OPRM1)|5999 (RGS4)|6331 (SCN5A)|6752 (SSTR2)|6833 (ABCC8)|6869 (TACR1)|7432 (VIP)|7442 (TRPV1)|10021 (HCN4)|10371 (SEMA3A)|22941 (SHANK2)|…
	N	GO|GO.BP	GO:0048589	developmental growth	1.41637e-07	0.0161409	39	367 (AR)|1292 (COL6A2)|1690 (COCH)|1813 (DRD2)|1946 (EFNA5)|2254 (FGF9)|2596 (GAP43)|3897 (L1CAM)|4880 (NPPC)|4886 (NPY1R)|5999 (RGS4)|6456 (SH3GL2)|6585 (SLIT1)|6857 (SYT1)|6860 (SYT4)|7161 (TP73)|7224 (TRPC5)|8851 (CDK5R1)|9254 (CACNA2D2)|9362 (CPNE6)|10371 (SEMA3A)|10409 (BASP1)|10439 (OLFM1)|22941 (SHANK2)|23025 (UNC13A)|23105 (FSTL4)|51760 (SYT17)|53335 (BCL11A)|55897 (MESP1)|57468 (SLC12A5)…
	N	GO|GO.MF	GO:0003674	molecular_function	1.4861e-07	0.0169356	459	58 (ACTA1)|107 (ADCY1)|116 (ADCYAP1)|284 (ANGPT1)|367 (AR)|398 (ARHGDIG)|432 (ASGR1)|478 (ATP1A3)|534 (ATP6V1G2)|758 (MPPED1)|773 (CACNA1A)|774 (CACNA1B)|781 (CACNA2D1)|793 (CALB1)|794 (CALB2)|862 (RUNX1T1)|885 (CCK)|956 (ENTPD3)|1005 (CDH7)|1006 (CDH8)|1010 (CDH12)|1038 (CDR1)|1114 (CHGB)|1131 (CHRM3)|1141 (CHRNB2)|1149 (CIDEA)|1159 (CKMT1B)|1261 (CNGA3)|1268 (CNR1)|1292 (COL6A2)|1310 (COL19A1)|…
	N	GO|GO.BP	GO:0051240	positive regulation of multicellular organismal process	1.49105e-07	0.016992	77	116 (ADCYAP1)|284 (ANGPT1)|367 (AR)|885 (CCK)|1131 (CHRM3)|1268 (CNR1)|1392 (CRH)|1745 (DLX1)|1813 (DRD2)|1946 (EFNA5)|2042 (EPHA3)|2048 (EPHB2)|2254 (FGF9)|2281 (FKBP1B)|2587 (GALR1)|2817 (GPC1)|3084 (NRG1)|3623 (INHA)|3897 (L1CAM)|4233 (MET)|4345 (CD200)|4674 (NAP1L2)|4745 (NELL1)|4804 (NGFR)|4842 (NOS1)|4880 (NPPC)|4887 (NPY2R)|4923 (NTSR1)|4988 (OPRM1)|5063 (PAK3)|5121 (PCP4)|5179 (PENK)|5228…
	N	GO|GO.CC	GO:0016021	integral component of membrane	1.62509e-07	0.0185195	179	107 (ADCY1)|432 (ASGR1)|478 (ATP1A3)|773 (CACNA1A)|774 (CACNA1B)|781 (CACNA2D1)|956 (ENTPD3)|1005 (CDH7)|1006 (CDH8)|1010 (CDH12)|1131 (CHRM3)|1141 (CHRNB2)|1261 (CNGA3)|1268 (CNR1)|1395 (CRHR2)|1534 (CYB561)|1813 (DRD2)|1816 (DRD5)|1951 (CELSR3)|2042 (EPHA3)|2046 (EPHA8)|2048 (EPHB2)|2281 (FKBP1B)|2566 (GABRG2)|2587 (GALR1)|2696 (GIPR)|2742 (GLRA2)|2834 (PRLHR)|2835 (GPR12)|2845 (GPR22)|2903 (GR…
	N	GO|GO.BP	GO:0072347	response to anesthetic	1.82527e-07	0.0208008	12	1141 (CHRNB2)|1268 (CNR1)|1392 (CRH)|1393 (CRHBP)|1813 (DRD2)|1816 (DRD5)|3208 (HPCA)|4986 (OPRK1)|4988 (OPRM1)|5179 (PENK)|5581 (PRKCE)|5999 (RGS4)
	N	GO|GO.MF	GO:0005516	calmodulin binding	2.0452e-07	0.0233072	19	107 (ADCY1)|1612 (DAPK1)|2596 (GAP43)|3756 (KCNH1)|4645 (MYO5B)|4804 (NGFR)|4842 (NOS1)|5121 (PCP4)|5136 (PDE1A)|5924 (RASGRF2)|5999 (RGS4)|6014 (RIT2)|6331 (SCN5A)|6857 (SYT1)|7442 (TRPV1)|23025 (UNC13A)|55503 (TRPV6)|56479 (KCNQ5)|139728 (PNCK)
	N	GO|GO.BP	GO:0035249	synaptic transmission, glutamatergic	2.2947e-07	0.0261504	13	116 (ADCYAP1)|1006 (CDH8)|1268 (CNR1)|1813 (DRD2)|2912 (GRM2)|4887 (NPY2R)|6812 (STXBP1)|6857 (SYT1)|10368 (CACNG3)|10369 (CACNG2)|22941 (SHANK2)|23025 (UNC13A)|63908 (NAPB)
	N	GO|GO.MF	GO:0005488	binding	2.72438e-07	0.031047	410	58 (ACTA1)|107 (ADCY1)|116 (ADCYAP1)|284 (ANGPT1)|367 (AR)|398 (ARHGDIG)|432 (ASGR1)|478 (ATP1A3)|773 (CACNA1A)|774 (CACNA1B)|781 (CACNA2D1)|793 (CALB1)|794 (CALB2)|862 (RUNX1T1)|885 (CCK)|956 (ENTPD3)|1005 (CDH7)|1006 (CDH8)|1010 (CDH12)|1038 (CDR1)|1114 (CHGB)|1131 (CHRM3)|1141 (CHRNB2)|1149 (CIDEA)|1159 (CKMT1B)|1261 (CNGA3)|1268 (CNR1)|1292 (COL6A2)|1310 (COL19A1)|1381 (CRABP1)|1392 (CRH)|139…
	N	GO|GO.BP	GO:0060291	long-term synaptic potentiation	2.86381e-07	0.032636	12	793 (CALB1)|794 (CALB2)|1392 (CRH)|1395 (CRHR2)|1813 (DRD2)|2048 (EPHB2)|2903 (GRIN2A)|2904 (GRIN2B)|2906 (GRIN2D)|6616 (SNAP25)|22941 (SHANK2)|27065 (NSG1)
	N	GO|GO.CC	GO:0012506	vesicle membrane	3.06679e-07	0.0349492	43	1813 (DRD2)|1832 (DSP)|2566 (GABRG2)|2571 (GAD1)|2572 (GAD2)|4645 (MYO5B)|4842 (NOS1)|4986 (OPRK1)|5864 (RAB3A)|5865 (RAB3B)|6338 (SCNN1B)|6456 (SH3GL2)|6616 (SNAP25)|6833 (ABCC8)|6853 (SYN1)|6855 (SYP)|6857 (SYT1)|6860 (SYT4)|6861 (SYT5)|8224 (SYN3)|8448 (DOC2A)|9143 (SYNGR3)|9856 (KIAA0319)|9899 (SV2B)|10368 (CACNG3)|10369 (CACNG2)|22987 (SV2C)|23025 (UNC13A)|27065 (NSG1)|29993 (PACSIN1)|51209 …
	N	GO|GO.BP	GO:0031345	negative regulation of cell projection organization	3.36323e-07	0.0383274	18	1400 (CRMP1)|2048 (EPHB2)|2904 (GRIN2B)|4804 (NGFR)|6014 (RIT2)|7070 (THY1)|7224 (TRPC5)|8851 (CDK5R1)|9856 (KIAA0319)|10371 (SEMA3A)|11075 (STMN2)|22876 (INPP5F)|23105 (FSTL4)|23329 (TBC1D30)|53335 (BCL11A)|57715 (SEMA4G)|65078 (RTN4R)|80128 (TRIM46)
	N	GO|GO.CC	GO:0034704	calcium channel complex	3.79773e-07	0.043279	11	773 (CACNA1A)|774 (CACNA1B)|781 (CACNA2D1)|2281 (FKBP1B)|4842 (NOS1)|7223 (TRPC4)|7224 (TRPC5)|9254 (CACNA2D2)|10368 (CACNG3)|10369 (CACNG2)|55799 (CACNA2D3)
	N	GO|GO.CC	GO:0030659	cytoplasmic vesicle membrane	3.81018e-07	0.0434208	42	1813 (DRD2)|1832 (DSP)|2566 (GABRG2)|2571 (GAD1)|2572 (GAD2)|4645 (MYO5B)|4986 (OPRK1)|5864 (RAB3A)|5865 (RAB3B)|6338 (SCNN1B)|6456 (SH3GL2)|6616 (SNAP25)|6833 (ABCC8)|6853 (SYN1)|6855 (SYP)|6857 (SYT1)|6860 (SYT4)|6861 (SYT5)|8224 (SYN3)|8448 (DOC2A)|9143 (SYNGR3)|9856 (KIAA0319)|9899 (SV2B)|10368 (CACNG3)|10369 (CACNG2)|22987 (SV2C)|23025 (UNC13A)|27065 (NSG1)|29993 (PACSIN1)|51209 (RAB9B)|5161…
	N	GO|GO.BP	GO:1903861	positive regulation of dendrite extension	3.82822e-07	0.0436264	7	6857 (SYT1)|6860 (SYT4)|9362 (CPNE6)|23025 (UNC13A)|51760 (SYT17)|57699 (CPNE5)|84258 (SYT3)
	N	GO|GO.BP	GO:0031338	regulation of vesicle fusion	3.83605e-07	0.0437156	8	5864 (RAB3A)|6812 (STXBP1)|6857 (SYT1)|6860 (SYT4)|8447 (DOC2B)|10814 (CPLX2)|10815 (CPLX1)|112476 (PRRT2)
	N	GO|GO.MF	GO:0015276	ligand-gated ion channel activity	3.91247e-07	0.0445865	16	1141 (CHRNB2)|1261 (CNGA3)|2281 (FKBP1B)|2566 (GABRG2)|2742 (GLRA2)|2903 (GRIN2A)|2904 (GRIN2B)|2906 (GRIN2D)|3762 (KCNJ5)|6338 (SCNN1B)|6833 (ABCC8)|7442 (TRPV1)|8001 (GLRA3)|9177 (HTR3B)|10021 (HCN4)|348980 (HCN1)
	N	GO|GO.MF	GO:0022834	ligand-gated channel activity	3.91247e-07	0.0445865	16	1141 (CHRNB2)|1261 (CNGA3)|2281 (FKBP1B)|2566 (GABRG2)|2742 (GLRA2)|2903 (GRIN2A)|2904 (GRIN2B)|2906 (GRIN2D)|3762 (KCNJ5)|6338 (SCNN1B)|6833 (ABCC8)|7442 (TRPV1)|8001 (GLRA3)|9177 (HTR3B)|10021 (HCN4)|348980 (HCN1)
	N	GO|GO.BP	GO:0051480	regulation of cytosolic calcium ion concentration	4.043e-07	0.046074	26	116 (ADCYAP1)|773 (CACNA1A)|781 (CACNA2D1)|793 (CALB1)|794 (CALB2)|1268 (CNR1)|1813 (DRD2)|2281 (FKBP1B)|2587 (GALR1)|2696 (GIPR)|2903 (GRIN2A)|2904 (GRIN2B)|2906 (GRIN2D)|4842 (NOS1)|4887 (NPY2R)|4923 (NTSR1)|5581 (PRKCE)|6869 (TACR1)|7070 (THY1)|7223 (TRPC4)|7224 (TRPC5)|7442 (TRPV1)|10518 (CIB2)|55503 (TRPV6)|114897 (C1QTNF1)|130733 (TMEM178A)
	N	GO|GO.CC	GO:0061200	clathrin-sculpted gamma-aminobutyric acid transport vesicle	4.1251e-07	0.0470097	5	2571 (GAD1)|2572 (GAD2)|5864 (RAB3A)|6857 (SYT1)|140679 (SLC32A1)
	N	GO|GO.CC	GO:0061202	clathrin-sculpted gamma-aminobutyric acid transport vesicle membrane	4.1251e-07	0.0470097	5	2571 (GAD1)|2572 (GAD2)|5864 (RAB3A)|6857 (SYT1)|140679 (SLC32A1)
	M	GO|GO.BP	GO:0001775	cell activation	3.05615e-61	3.48279e-56	153	60 (ACTB)|409 (ARRB2)|602 (BCL3)|695 (BTK)|718 (C3)|719 (C3AR1)|728 (C5AR1)|920 (CD4)|923 (CD6)|929 (CD14)|933 (CD22)|942 (CD86)|963 (CD53)|972 (CD74)|1050 (CEBPA)|1051 (CEBPB)|1435 (CSF1)|1445 (CSK)|1471 (CST3)|1509 (CTSD)|1520 (CTSS)|1522 (CTSZ)|1535 (CYBA)|1536 (CYBB)|1794 (DOCK2)|1960 (EGR3)|2000 (ELF4)|2185 (PTK2B)|2207 (FCER1G)|2212 (FCGR2A)|2215 (FCGR3B)|2242 (FES)|2268 (FGR)|2357 (FPR1)|2…
	M	GO|GO.BP	GO:0002376	immune system process	8.78022e-58	1.00059e-52	219	60 (ACTB)|113 (ADCY7)|162 (AP1B1)|409 (ARRB2)|602 (BCL3)|695 (BTK)|712 (C1QA)|713 (C1QB)|714 (C1QC)|718 (C3)|719 (C3AR1)|728 (C5AR1)|834 (CASP1)|920 (CD4)|923 (CD6)|929 (CD14)|933 (CD22)|942 (CD86)|963 (CD53)|972 (CD74)|1050 (CEBPA)|1051 (CEBPB)|1230 (CCR1)|1240 (CMKLR1)|1435 (CSF1)|1436 (CSF1R)|1441 (CSF3R)|1445 (CSK)|1471 (CST3)|1509 (CTSD)|1520 (CTSS)|1522 (CTSZ)|1535 (CYBA)|1536 (CYBB)|1777 (…
	M	GO|GO.BP	GO:0006955	immune response	6.14438e-57	7.00214e-52	183	60 (ACTB)|113 (ADCY7)|409 (ARRB2)|602 (BCL3)|695 (BTK)|712 (C1QA)|713 (C1QB)|714 (C1QC)|718 (C3)|719 (C3AR1)|728 (C5AR1)|834 (CASP1)|920 (CD4)|923 (CD6)|929 (CD14)|933 (CD22)|942 (CD86)|963 (CD53)|972 (CD74)|1051 (CEBPB)|1230 (CCR1)|1240 (CMKLR1)|1435 (CSF1)|1436 (CSF1R)|1445 (CSK)|1471 (CST3)|1509 (CTSD)|1520 (CTSS)|1522 (CTSZ)|1535 (CYBA)|1536 (CYBB)|1794 (DOCK2)|2000 (ELF4)|2099 (ESR1)|2185 (P…
	M	GO|GO.BP	GO:0045321	leukocyte activation	8.49175e-57	9.6772e-52	140	602 (BCL3)|695 (BTK)|718 (C3)|719 (C3AR1)|728 (C5AR1)|920 (CD4)|923 (CD6)|929 (CD14)|933 (CD22)|942 (CD86)|963 (CD53)|972 (CD74)|1050 (CEBPA)|1051 (CEBPB)|1435 (CSF1)|1445 (CSK)|1471 (CST3)|1509 (CTSD)|1520 (CTSS)|1522 (CTSZ)|1535 (CYBA)|1536 (CYBB)|1794 (DOCK2)|1960 (EGR3)|2000 (ELF4)|2185 (PTK2B)|2207 (FCER1G)|2212 (FCGR2A)|2215 (FCGR3B)|2242 (FES)|2268 (FGR)|2357 (FPR1)|2588 (GALNS)|2683 (B4GA…
	M	GO|GO.BP	GO:0002366	leukocyte activation involved in immune response	6.4324e-47	7.33036e-42	97	602 (BCL3)|695 (BTK)|718 (C3)|719 (C3AR1)|728 (C5AR1)|929 (CD14)|942 (CD86)|963 (CD53)|1471 (CST3)|1509 (CTSD)|1520 (CTSS)|1522 (CTSZ)|1535 (CYBA)|1536 (CYBB)|1794 (DOCK2)|2185 (PTK2B)|2207 (FCER1G)|2212 (FCGR2A)|2215 (FCGR3B)|2242 (FES)|2268 (FGR)|2357 (FPR1)|2588 (GALNS)|2683 (B4GALT1)|2799 (GNS)|2896 (GRN)|3101 (HK3)|3109 (HLA-DMB)|3162 (HMOX1)|3303 (HSPA1A)|3383 (ICAM1)|3566 (IL4R)|3683 (ITGA…
	M	GO|GO.BP	GO:0002263	cell activation involved in immune response	1.08037e-46	1.23119e-41	97	602 (BCL3)|695 (BTK)|718 (C3)|719 (C3AR1)|728 (C5AR1)|929 (CD14)|942 (CD86)|963 (CD53)|1471 (CST3)|1509 (CTSD)|1520 (CTSS)|1522 (CTSZ)|1535 (CYBA)|1536 (CYBB)|1794 (DOCK2)|2185 (PTK2B)|2207 (FCER1G)|2212 (FCGR2A)|2215 (FCGR3B)|2242 (FES)|2268 (FGR)|2357 (FPR1)|2588 (GALNS)|2683 (B4GALT1)|2799 (GNS)|2896 (GRN)|3101 (HK3)|3109 (HLA-DMB)|3162 (HMOX1)|3303 (HSPA1A)|3383 (ICAM1)|3566 (IL4R)|3683 (ITGA…
	M	GO|GO.BP	GO:0002252	immune effector process	1.89497e-44	2.15951e-39	124	60 (ACTB)|409 (ARRB2)|602 (BCL3)|695 (BTK)|712 (C1QA)|713 (C1QB)|714 (C1QC)|718 (C3)|719 (C3AR1)|728 (C5AR1)|929 (CD14)|933 (CD22)|942 (CD86)|963 (CD53)|972 (CD74)|1471 (CST3)|1509 (CTSD)|1520 (CTSS)|1522 (CTSZ)|1535 (CYBA)|1536 (CYBB)|1794 (DOCK2)|2185 (PTK2B)|2207 (FCER1G)|2212 (FCGR2A)|2215 (FCGR3B)|2242 (FES)|2268 (FGR)|2357 (FPR1)|2588 (GALNS)|2683 (B4GALT1)|2799 (GNS)|2896 (GRN)|3077 (HFE)|…
	M	GO|GO.BP	GO:0002274	myeloid leukocyte activation	5.17043e-43	5.89222e-38	89	695 (BTK)|718 (C3)|719 (C3AR1)|728 (C5AR1)|929 (CD14)|963 (CD53)|972 (CD74)|1050 (CEBPA)|1435 (CSF1)|1471 (CST3)|1509 (CTSD)|1520 (CTSS)|1522 (CTSZ)|1535 (CYBA)|1536 (CYBB)|1794 (DOCK2)|2207 (FCER1G)|2212 (FCGR2A)|2215 (FCGR3B)|2242 (FES)|2268 (FGR)|2357 (FPR1)|2588 (GALNS)|2683 (B4GALT1)|2799 (GNS)|2896 (GRN)|3101 (HK3)|3162 (HMOX1)|3303 (HSPA1A)|3566 (IL4R)|3683 (ITGAL)|3684 (ITGAM)|3687 (ITGAX…
	M	GO|GO.BP	GO:0002684	positive regulation of immune system process	6.78371e-41	7.73072e-36	112	60 (ACTB)|409 (ARRB2)|695 (BTK)|712 (C1QA)|713 (C1QB)|714 (C1QC)|718 (C3)|719 (C3AR1)|728 (C5AR1)|920 (CD4)|923 (CD6)|929 (CD14)|933 (CD22)|942 (CD86)|972 (CD74)|1050 (CEBPA)|1230 (CCR1)|1240 (CMKLR1)|1435 (CSF1)|1445 (CSK)|1520 (CTSS)|1535 (CYBA)|1960 (EGR3)|2099 (ESR1)|2124 (EVI2B)|2185 (PTK2B)|2207 (FCER1G)|2212 (FCGR2A)|2242 (FES)|2268 (FGR)|2357 (FPR1)|2533 (FYB1)|3059 (HCLS1)|3077 (HFE)|310…
	M	GO|GO.BP	GO:0006952	defense response	1.59318e-39	1.81559e-34	136	113 (ADCY7)|140 (ADORA3)|215 (ABCD1)|409 (ARRB2)|602 (BCL3)|695 (BTK)|712 (C1QA)|713 (C1QB)|714 (C1QC)|718 (C3)|719 (C3AR1)|728 (C5AR1)|834 (CASP1)|920 (CD4)|923 (CD6)|929 (CD14)|972 (CD74)|1050 (CEBPA)|1051 (CEBPB)|1230 (CCR1)|1240 (CMKLR1)|1435 (CSF1)|1436 (CSF1R)|1441 (CSF3R)|1471 (CST3)|1520 (CTSS)|1535 (CYBA)|1536 (CYBB)|2000 (ELF4)|2099 (ESR1)|2185 (PTK2B)|2207 (FCER1G)|2268 (FGR)|2350 (FOL…
	M	GO|GO.BP	GO:0002275	myeloid cell activation involved in immune response	1.06443e-38	1.21302e-33	78	695 (BTK)|718 (C3)|719 (C3AR1)|728 (C5AR1)|929 (CD14)|963 (CD53)|1471 (CST3)|1509 (CTSD)|1520 (CTSS)|1522 (CTSZ)|1535 (CYBA)|1536 (CYBB)|1794 (DOCK2)|2207 (FCER1G)|2212 (FCGR2A)|2215 (FCGR3B)|2242 (FES)|2268 (FGR)|2357 (FPR1)|2588 (GALNS)|2683 (B4GALT1)|2799 (GNS)|2896 (GRN)|3101 (HK3)|3162 (HMOX1)|3303 (HSPA1A)|3566 (IL4R)|3683 (ITGAL)|3684 (ITGAM)|3687 (ITGAX)|3689 (ITGB2)|3958 (LGALS3)|4057 (L…
	M	GO|GO.BP	GO:0002682	regulation of immune system process	4.15347e-38	4.73329e-33	129	60 (ACTB)|113 (ADCY7)|409 (ARRB2)|695 (BTK)|712 (C1QA)|713 (C1QB)|714 (C1QC)|718 (C3)|719 (C3AR1)|728 (C5AR1)|920 (CD4)|923 (CD6)|929 (CD14)|933 (CD22)|942 (CD86)|972 (CD74)|1050 (CEBPA)|1051 (CEBPB)|1230 (CCR1)|1240 (CMKLR1)|1435 (CSF1)|1441 (CSF3R)|1445 (CSK)|1520 (CTSS)|1535 (CYBA)|1960 (EGR3)|2099 (ESR1)|2124 (EVI2B)|2185 (PTK2B)|2207 (FCER1G)|2212 (FCGR2A)|2242 (FES)|2268 (FGR)|2357 (FPR1)|2…
	M	GO|GO.BP	GO:0043299	leukocyte degranulation	2.06078e-37	2.34847e-32	76	695 (BTK)|718 (C3)|719 (C3AR1)|728 (C5AR1)|929 (CD14)|963 (CD53)|1471 (CST3)|1509 (CTSD)|1520 (CTSS)|1522 (CTSZ)|1535 (CYBA)|1536 (CYBB)|1794 (DOCK2)|2207 (FCER1G)|2212 (FCGR2A)|2215 (FCGR3B)|2242 (FES)|2268 (FGR)|2357 (FPR1)|2588 (GALNS)|2683 (B4GALT1)|2799 (GNS)|2896 (GRN)|3101 (HK3)|3162 (HMOX1)|3303 (HSPA1A)|3566 (IL4R)|3683 (ITGAL)|3684 (ITGAM)|3687 (ITGAX)|3689 (ITGB2)|3958 (LGALS3)|4057 (L…
	M	GO|GO.BP	GO:0002444	myeloid leukocyte mediated immunity	1.91784e-36	2.18558e-31	76	695 (BTK)|718 (C3)|719 (C3AR1)|728 (C5AR1)|929 (CD14)|963 (CD53)|1471 (CST3)|1509 (CTSD)|1520 (CTSS)|1522 (CTSZ)|1535 (CYBA)|1536 (CYBB)|1794 (DOCK2)|2207 (FCER1G)|2212 (FCGR2A)|2215 (FCGR3B)|2242 (FES)|2268 (FGR)|2357 (FPR1)|2588 (GALNS)|2683 (B4GALT1)|2799 (GNS)|2896 (GRN)|3101 (HK3)|3162 (HMOX1)|3303 (HSPA1A)|3566 (IL4R)|3683 (ITGAL)|3684 (ITGAM)|3687 (ITGAX)|3689 (ITGB2)|3958 (LGALS3)|4057 (L…
	M	GO|GO.BP	GO:0002443	leukocyte mediated immunity	3.71457e-36	4.23312e-31	94	409 (ARRB2)|602 (BCL3)|695 (BTK)|712 (C1QA)|713 (C1QB)|714 (C1QC)|718 (C3)|719 (C3AR1)|728 (C5AR1)|929 (CD14)|963 (CD53)|972 (CD74)|1471 (CST3)|1509 (CTSD)|1520 (CTSS)|1522 (CTSZ)|1535 (CYBA)|1536 (CYBB)|1794 (DOCK2)|2207 (FCER1G)|2212 (FCGR2A)|2215 (FCGR3B)|2242 (FES)|2268 (FGR)|2357 (FPR1)|2588 (GALNS)|2683 (B4GALT1)|2799 (GNS)|2896 (GRN)|3077 (HFE)|3101 (HK3)|3162 (HMOX1)|3303 (HSPA1A)|3383 (I…
	M	GO|GO.BP	GO:0050896	response to stimulus	1.70806e-35	1.94651e-30	350	60 (ACTB)|113 (ADCY7)|140 (ADORA3)|154 (ADRB2)|215 (ABCD1)|241 (ALOX5AP)|388 (RHOB)|393 (ARHGAP4)|409 (ARRB2)|463 (ZFHX3)|467 (ATF3)|598 (BCL2L1)|602 (BCL3)|637 (BID)|694 (BTG1)|695 (BTK)|712 (C1QA)|713 (C1QB)|714 (C1QC)|718 (C3)|719 (C3AR1)|728 (C5AR1)|834 (CASP1)|920 (CD4)|923 (CD6)|929 (CD14)|933 (CD22)|942 (CD86)|951 (CD37)|963 (CD53)|972 (CD74)|1040 (CDS1)|1050 (CEBPA)|1051 (CEBPB)|1230 (CCR…
	M	GO|GO.BP	GO:0001816	cytokine production	8.73819e-35	9.95805e-30	84	113 (ADCY7)|215 (ABCD1)|409 (ARRB2)|602 (BCL3)|695 (BTK)|718 (C3)|719 (C3AR1)|728 (C5AR1)|834 (CASP1)|920 (CD4)|923 (CD6)|929 (CD14)|942 (CD86)|972 (CD74)|1051 (CEBPB)|1240 (CMKLR1)|1436 (CSF1R)|1445 (CSK)|1535 (CYBA)|1536 (CYBB)|2207 (FCER1G)|2268 (FGR)|3077 (HFE)|3162 (HMOX1)|3303 (HSPA1A)|3566 (IL4R)|3570 (IL6R)|3635 (INPP5D)|3659 (IRF1)|3663 (IRF5)|3937 (LCP2)|4057 (LTF)|4067 (LYN)|4094 (MAF)…
	M	GO|GO.BP	GO:0050776	regulation of immune response	9.37065e-35	1.06788e-29	100	60 (ACTB)|113 (ADCY7)|409 (ARRB2)|695 (BTK)|712 (C1QA)|713 (C1QB)|714 (C1QC)|718 (C3)|719 (C3AR1)|728 (C5AR1)|920 (CD4)|929 (CD14)|933 (CD22)|942 (CD86)|972 (CD74)|1240 (CMKLR1)|1445 (CSK)|1520 (CTSS)|1535 (CYBA)|2099 (ESR1)|2207 (FCER1G)|2212 (FCGR2A)|2242 (FES)|2268 (FGR)|2357 (FPR1)|2533 (FYB1)|3077 (HFE)|3109 (HLA-DMB)|3162 (HMOX1)|3303 (HSPA1A)|3383 (ICAM1)|3459 (IFNGR1)|3566 (IL4R)|3570 (IL…
	M	GO|GO.BP	GO:0048584	positive regulation of response to stimulus	1.26299e-33	1.4393e-28	155	60 (ACTB)|154 (ADRB2)|393 (ARHGAP4)|409 (ARRB2)|467 (ATF3)|598 (BCL2L1)|637 (BID)|695 (BTK)|712 (C1QA)|713 (C1QB)|714 (C1QC)|718 (C3)|719 (C3AR1)|728 (C5AR1)|834 (CASP1)|920 (CD4)|923 (CD6)|929 (CD14)|933 (CD22)|942 (CD86)|972 (CD74)|1050 (CEBPA)|1230 (CCR1)|1240 (CMKLR1)|1435 (CSF1)|1436 (CSF1R)|1445 (CSK)|1520 (CTSS)|1535 (CYBA)|1796 (DOK1)|2099 (ESR1)|2185 (PTK2B)|2207 (FCER1G)|2212 (FCGR2A)|2…
	M	GO|GO.BP	GO:0045055	regulated exocytosis	1.76539e-32	2.01184e-27	85	695 (BTK)|718 (C3)|719 (C3AR1)|728 (C5AR1)|929 (CD14)|963 (CD53)|1471 (CST3)|1509 (CTSD)|1520 (CTSS)|1522 (CTSZ)|1535 (CYBA)|1536 (CYBB)|1794 (DOCK2)|2162 (F13A1)|2207 (FCER1G)|2212 (FCGR2A)|2215 (FCGR3B)|2242 (FES)|2268 (FGR)|2357 (FPR1)|2588 (GALNS)|2683 (B4GALT1)|2799 (GNS)|2896 (GRN)|3101 (HK3)|3162 (HMOX1)|3303 (HSPA1A)|3566 (IL4R)|3683 (ITGAL)|3684 (ITGAM)|3687 (ITGAX)|3689 (ITGB2)|3958 (LG…
	M	GO|GO.BP	GO:0006954	inflammatory response	4.87392e-32	5.55432e-27	84	113 (ADCY7)|140 (ADORA3)|215 (ABCD1)|695 (BTK)|712 (C1QA)|713 (C1QB)|714 (C1QC)|718 (C3)|719 (C3AR1)|728 (C5AR1)|923 (CD6)|929 (CD14)|1050 (CEBPA)|1051 (CEBPB)|1230 (CCR1)|1240 (CMKLR1)|1435 (CSF1)|1436 (CSF1R)|1535 (CYBA)|1536 (CYBB)|2099 (ESR1)|2207 (FCER1G)|2350 (FOLR2)|2357 (FPR1)|2683 (B4GALT1)|2687 (GGT5)|3077 (HFE)|3162 (HMOX1)|3383 (ICAM1)|3566 (IL4R)|3570 (IL6R)|3683 (ITGAL)|3684 (ITGAM)…
	M	GO|GO.BP	GO:0006950	response to stress	6.51683e-31	7.42658e-26	202	60 (ACTB)|113 (ADCY7)|140 (ADORA3)|154 (ADRB2)|215 (ABCD1)|388 (RHOB)|409 (ARRB2)|467 (ATF3)|598 (BCL2L1)|602 (BCL3)|637 (BID)|694 (BTG1)|695 (BTK)|712 (C1QA)|713 (C1QB)|714 (C1QC)|718 (C3)|719 (C3AR1)|728 (C5AR1)|834 (CASP1)|920 (CD4)|923 (CD6)|929 (CD14)|972 (CD74)|1050 (CEBPA)|1051 (CEBPB)|1230 (CCR1)|1240 (CMKLR1)|1435 (CSF1)|1436 (CSF1R)|1441 (CSF3R)|1471 (CST3)|1520 (CTSS)|1535 (CYBA)|1536 …
	M	GO|GO.BP	GO:0001817	regulation of cytokine production	1.14314e-30	1.30273e-25	75	113 (ADCY7)|215 (ABCD1)|409 (ARRB2)|602 (BCL3)|695 (BTK)|718 (C3)|719 (C3AR1)|728 (C5AR1)|834 (CASP1)|920 (CD4)|923 (CD6)|929 (CD14)|942 (CD86)|972 (CD74)|1051 (CEBPB)|1240 (CMKLR1)|1436 (CSF1R)|1445 (CSK)|1535 (CYBA)|1536 (CYBB)|2207 (FCER1G)|2268 (FGR)|3077 (HFE)|3162 (HMOX1)|3303 (HSPA1A)|3566 (IL4R)|3570 (IL6R)|3635 (INPP5D)|3659 (IRF1)|3663 (IRF5)|4057 (LTF)|4067 (LYN)|4615 (MYD88)|4791 (NFK…
	M	GO|GO.BP	GO:0050778	positive regulation of immune response	2.36821e-30	2.69881e-25	84	60 (ACTB)|409 (ARRB2)|695 (BTK)|712 (C1QA)|713 (C1QB)|714 (C1QC)|718 (C3)|719 (C3AR1)|728 (C5AR1)|920 (CD4)|929 (CD14)|933 (CD22)|942 (CD86)|972 (CD74)|1240 (CMKLR1)|1445 (CSK)|1520 (CTSS)|1535 (CYBA)|2099 (ESR1)|2207 (FCER1G)|2212 (FCGR2A)|2268 (FGR)|2357 (FPR1)|2533 (FYB1)|3077 (HFE)|3109 (HLA-DMB)|3303 (HSPA1A)|3566 (IL4R)|3570 (IL6R)|3635 (INPP5D)|3659 (IRF1)|3684 (ITGAM)|3689 (ITGB2)|3937 (L…
	M	GO|GO.BP	GO:0043312	neutrophil degranulation	2.84148e-30	3.23815e-25	65	718 (C3)|719 (C3AR1)|728 (C5AR1)|929 (CD14)|963 (CD53)|1471 (CST3)|1509 (CTSD)|1520 (CTSS)|1522 (CTSZ)|1535 (CYBA)|1536 (CYBB)|1794 (DOCK2)|2207 (FCER1G)|2212 (FCGR2A)|2215 (FCGR3B)|2268 (FGR)|2357 (FPR1)|2588 (GALNS)|2683 (B4GALT1)|2799 (GNS)|2896 (GRN)|3101 (HK3)|3303 (HSPA1A)|3683 (ITGAL)|3684 (ITGAM)|3687 (ITGAX)|3689 (ITGB2)|3958 (LGALS3)|4057 (LTF)|4353 (MPO)|4758 (NEU1)|4860 (PNP)|5199 (CF…
	M	GO|GO.BP	GO:0002283	neutrophil activation involved in immune response	4.10141e-30	4.67397e-25	65	718 (C3)|719 (C3AR1)|728 (C5AR1)|929 (CD14)|963 (CD53)|1471 (CST3)|1509 (CTSD)|1520 (CTSS)|1522 (CTSZ)|1535 (CYBA)|1536 (CYBB)|1794 (DOCK2)|2207 (FCER1G)|2212 (FCGR2A)|2215 (FCGR3B)|2268 (FGR)|2357 (FPR1)|2588 (GALNS)|2683 (B4GALT1)|2799 (GNS)|2896 (GRN)|3101 (HK3)|3303 (HSPA1A)|3683 (ITGAL)|3684 (ITGAM)|3687 (ITGAX)|3689 (ITGB2)|3958 (LGALS3)|4057 (LTF)|4353 (MPO)|4758 (NEU1)|4860 (PNP)|5199 (CF…
	M	GO|GO.BP	GO:0006887	exocytosis	8.02488e-30	9.14516e-25	87	695 (BTK)|718 (C3)|719 (C3AR1)|728 (C5AR1)|929 (CD14)|963 (CD53)|1230 (CCR1)|1471 (CST3)|1509 (CTSD)|1520 (CTSS)|1522 (CTSZ)|1535 (CYBA)|1536 (CYBB)|1794 (DOCK2)|2162 (F13A1)|2207 (FCER1G)|2212 (FCGR2A)|2215 (FCGR3B)|2242 (FES)|2268 (FGR)|2357 (FPR1)|2588 (GALNS)|2683 (B4GALT1)|2799 (GNS)|2896 (GRN)|3101 (HK3)|3162 (HMOX1)|3303 (HSPA1A)|3566 (IL4R)|3683 (ITGAL)|3684 (ITGAM)|3687 (ITGAX)|3689 (ITG…
	M	GO|GO.BP	GO:0042119	neutrophil activation	1.36592e-29	1.5566e-24	65	718 (C3)|719 (C3AR1)|728 (C5AR1)|929 (CD14)|963 (CD53)|1471 (CST3)|1509 (CTSD)|1520 (CTSS)|1522 (CTSZ)|1535 (CYBA)|1536 (CYBB)|1794 (DOCK2)|2207 (FCER1G)|2212 (FCGR2A)|2215 (FCGR3B)|2268 (FGR)|2357 (FPR1)|2588 (GALNS)|2683 (B4GALT1)|2799 (GNS)|2896 (GRN)|3101 (HK3)|3303 (HSPA1A)|3683 (ITGAL)|3684 (ITGAM)|3687 (ITGAX)|3689 (ITGB2)|3958 (LGALS3)|4057 (LTF)|4353 (MPO)|4758 (NEU1)|4860 (PNP)|5199 (CF…
	M	GO|GO.BP	GO:0002446	neutrophil mediated immunity	1.53795e-29	1.75265e-24	65	718 (C3)|719 (C3AR1)|728 (C5AR1)|929 (CD14)|963 (CD53)|1471 (CST3)|1509 (CTSD)|1520 (CTSS)|1522 (CTSZ)|1535 (CYBA)|1536 (CYBB)|1794 (DOCK2)|2207 (FCER1G)|2212 (FCGR2A)|2215 (FCGR3B)|2268 (FGR)|2357 (FPR1)|2588 (GALNS)|2683 (B4GALT1)|2799 (GNS)|2896 (GRN)|3101 (HK3)|3303 (HSPA1A)|3683 (ITGAL)|3684 (ITGAM)|3687 (ITGAX)|3689 (ITGB2)|3958 (LGALS3)|4057 (LTF)|4353 (MPO)|4758 (NEU1)|4860 (PNP)|5199 (CF…
	M	GO|GO.BP	GO:0036230	granulocyte activation	3.11414e-29	3.54887e-24	65	718 (C3)|719 (C3AR1)|728 (C5AR1)|929 (CD14)|963 (CD53)|1471 (CST3)|1509 (CTSD)|1520 (CTSS)|1522 (CTSZ)|1535 (CYBA)|1536 (CYBB)|1794 (DOCK2)|2207 (FCER1G)|2212 (FCGR2A)|2215 (FCGR3B)|2268 (FGR)|2357 (FPR1)|2588 (GALNS)|2683 (B4GALT1)|2799 (GNS)|2896 (GRN)|3101 (HK3)|3303 (HSPA1A)|3683 (ITGAL)|3684 (ITGAM)|3687 (ITGAX)|3689 (ITGB2)|3958 (LGALS3)|4057 (LTF)|4353 (MPO)|4758 (NEU1)|4860 (PNP)|5199 (CF…
	M	GO|GO.BP	GO:0046903	secretion	1.29937e-28	1.48076e-23	117	695 (BTK)|718 (C3)|719 (C3AR1)|728 (C5AR1)|834 (CASP1)|929 (CD14)|933 (CD22)|963 (CD53)|972 (CD74)|1230 (CCR1)|1436 (CSF1R)|1471 (CST3)|1509 (CTSD)|1520 (CTSS)|1522 (CTSZ)|1535 (CYBA)|1536 (CYBB)|1794 (DOCK2)|2162 (F13A1)|2207 (FCER1G)|2212 (FCGR2A)|2215 (FCGR3B)|2242 (FES)|2268 (FGR)|2357 (FPR1)|2588 (GALNS)|2683 (B4GALT1)|2799 (GNS)|2896 (GRN)|3077 (HFE)|3099 (HK2)|3101 (HK3)|3162 (HMOX1)|3274 …
	M	GO|GO.BP	GO:0009605	response to external stimulus	1.94933e-28	2.22145e-23	147	113 (ADCY7)|154 (ADRB2)|215 (ABCD1)|409 (ARRB2)|467 (ATF3)|598 (BCL2L1)|602 (BCL3)|695 (BTK)|712 (C1QA)|713 (C1QB)|714 (C1QC)|718 (C3)|719 (C3AR1)|728 (C5AR1)|834 (CASP1)|920 (CD4)|923 (CD6)|929 (CD14)|942 (CD86)|972 (CD74)|1040 (CDS1)|1050 (CEBPA)|1051 (CEBPB)|1230 (CCR1)|1240 (CMKLR1)|1435 (CSF1)|1436 (CSF1R)|1439 (CSF2RB)|1441 (CSF3R)|1535 (CYBA)|1536 (CYBB)|1794 (DOCK2)|1796 (DOK1)|1960 (EGR3…
	M	GO|GO.BP	GO:0002253	activation of immune response	1.2415e-27	1.41481e-22	71	60 (ACTB)|409 (ARRB2)|695 (BTK)|712 (C1QA)|713 (C1QB)|714 (C1QC)|718 (C3)|719 (C3AR1)|728 (C5AR1)|920 (CD4)|929 (CD14)|933 (CD22)|1240 (CMKLR1)|1445 (CSK)|1520 (CTSS)|1535 (CYBA)|2099 (ESR1)|2207 (FCER1G)|2212 (FCGR2A)|2268 (FGR)|2357 (FPR1)|2533 (FYB1)|3303 (HSPA1A)|3635 (INPP5D)|3659 (IRF1)|3684 (ITGAM)|3689 (ITGB2)|3937 (LCP2)|3958 (LGALS3)|4057 (LTF)|4067 (LYN)|4615 (MYD88)|5199 (CFP)|5293 (P…
	M	GO|GO.BP	GO:0032940	secretion by cell	3.65833e-27	4.16904e-22	109	695 (BTK)|718 (C3)|719 (C3AR1)|728 (C5AR1)|834 (CASP1)|929 (CD14)|933 (CD22)|963 (CD53)|1230 (CCR1)|1436 (CSF1R)|1471 (CST3)|1509 (CTSD)|1520 (CTSS)|1522 (CTSZ)|1535 (CYBA)|1536 (CYBB)|1794 (DOCK2)|2162 (F13A1)|2207 (FCER1G)|2212 (FCGR2A)|2215 (FCGR3B)|2242 (FES)|2268 (FGR)|2357 (FPR1)|2588 (GALNS)|2683 (B4GALT1)|2799 (GNS)|2896 (GRN)|3077 (HFE)|3101 (HK3)|3162 (HMOX1)|3303 (HSPA1A)|3566 (IL4R)|3…
	M	GO|GO.BP	GO:0016192	vesicle-mediated transport	9.1236e-27	1.03973e-21	131	60 (ACTB)|154 (ADRB2)|162 (AP1B1)|388 (RHOB)|409 (ARRB2)|598 (BCL2L1)|695 (BTK)|718 (C3)|719 (C3AR1)|728 (C5AR1)|923 (CD6)|929 (CD14)|933 (CD22)|963 (CD53)|1230 (CCR1)|1445 (CSK)|1471 (CST3)|1509 (CTSD)|1520 (CTSS)|1522 (CTSZ)|1535 (CYBA)|1536 (CYBB)|1794 (DOCK2)|2162 (F13A1)|2207 (FCER1G)|2212 (FCGR2A)|2215 (FCGR3B)|2242 (FES)|2268 (FGR)|2350 (FOLR2)|2357 (FPR1)|2588 (GALNS)|2683 (B4GALT1)|2799 …
	M	GO|GO.BP	GO:0046649	lymphocyte activation	1.96642e-26	2.24094e-21	73	602 (BCL3)|695 (BTK)|920 (CD4)|923 (CD6)|933 (CD22)|942 (CD86)|972 (CD74)|1051 (CEBPB)|1445 (CSK)|1794 (DOCK2)|1960 (EGR3)|2000 (ELF4)|2185 (PTK2B)|2207 (FCER1G)|3077 (HFE)|3109 (HLA-DMB)|3111 (HLA-DOA)|3383 (ICAM1)|3566 (IL4R)|3570 (IL6R)|3635 (INPP5D)|3659 (IRF1)|3683 (ITGAL)|3689 (ITGB2)|3936 (LCP1)|3955 (LFNG)|3956 (LGALS1)|3958 (LGALS3)|4066 (LYL1)|4067 (LYN)|4860 (PNP)|5293 (PIK3CD)|5294 (P…
	M	GO|GO.BP	GO:0002757	immune response-activating signal transduction	2.84633e-26	3.24367e-21	65	60 (ACTB)|409 (ARRB2)|695 (BTK)|719 (C3AR1)|728 (C5AR1)|920 (CD4)|929 (CD14)|933 (CD22)|1240 (CMKLR1)|1445 (CSK)|1520 (CTSS)|1535 (CYBA)|2099 (ESR1)|2207 (FCER1G)|2212 (FCGR2A)|2268 (FGR)|2357 (FPR1)|2533 (FYB1)|3303 (HSPA1A)|3635 (INPP5D)|3659 (IRF1)|3684 (ITGAM)|3689 (ITGB2)|3937 (LCP2)|3958 (LGALS3)|4057 (LTF)|4067 (LYN)|4615 (MYD88)|5293 (PIK3CD)|5336 (PLCG2)|5580 (PRKCD)|5788 (PTPRC)|5970 (R…
	M	GO|GO.CC	GO:0031982	vesicle	3.25072e-26	3.70452e-21	190	60 (ACTB)|154 (ADRB2)|162 (AP1B1)|388 (RHOB)|409 (ARRB2)|598 (BCL2L1)|695 (BTK)|718 (C3)|719 (C3AR1)|728 (C5AR1)|752 (FMNL1)|920 (CD4)|929 (CD14)|933 (CD22)|942 (CD86)|951 (CD37)|963 (CD53)|972 (CD74)|1293 (COL6A3)|1445 (CSK)|1471 (CST3)|1509 (CTSD)|1520 (CTSS)|1522 (CTSZ)|1535 (CYBA)|1536 (CYBB)|1777 (DNASE2)|1794 (DOCK2)|2027 (ENO3)|2162 (F13A1)|2207 (FCER1G)|2212 (FCGR2A)|2215 (FCGR3B)|2242 (F…
	M	GO|GO.BP	GO:0045087	innate immune response	5.70706e-26	6.50376e-21	82	409 (ARRB2)|695 (BTK)|712 (C1QA)|713 (C1QB)|714 (C1QC)|718 (C3)|834 (CASP1)|923 (CD6)|929 (CD14)|1435 (CSF1)|1436 (CSF1R)|1520 (CTSS)|1535 (CYBA)|1536 (CYBB)|2000 (ELF4)|2099 (ESR1)|2207 (FCER1G)|2268 (FGR)|3077 (HFE)|3303 (HSPA1A)|3383 (ICAM1)|3459 (IFNGR1)|3659 (IRF1)|3663 (IRF5)|3684 (ITGAM)|3689 (ITGB2)|3958 (LGALS3)|4057 (LTF)|4067 (LYN)|4360 (MRC1)|4615 (MYD88)|4688 (NCF2)|4939 (OAS2)|5199 …
	M	GO|GO.BP	GO:0001819	positive regulation of cytokine production	6.38621e-26	7.27773e-21	56	602 (BCL3)|718 (C3)|719 (C3AR1)|728 (C5AR1)|834 (CASP1)|920 (CD4)|923 (CD6)|929 (CD14)|942 (CD86)|972 (CD74)|1051 (CEBPB)|1436 (CSF1R)|1535 (CYBA)|1536 (CYBB)|2207 (FCER1G)|2268 (FGR)|3162 (HMOX1)|3303 (HSPA1A)|3566 (IL4R)|3570 (IL6R)|3659 (IRF1)|3663 (IRF5)|4615 (MYD88)|4791 (NFKB2)|5045 (FURIN)|5054 (SERPINE1)|5336 (PLCG2)|5724 (PTAFR)|5734 (PTGER4)|5788 (PTPRC)|5970 (RELA)|6693 (SPN)|6778 (STA…
	M	GO|GO.BP	GO:0002764	immune response-regulating signaling pathway	1.00546e-25	1.14583e-20	66	60 (ACTB)|409 (ARRB2)|695 (BTK)|719 (C3AR1)|728 (C5AR1)|920 (CD4)|929 (CD14)|933 (CD22)|1240 (CMKLR1)|1445 (CSK)|1520 (CTSS)|1535 (CYBA)|2099 (ESR1)|2207 (FCER1G)|2212 (FCGR2A)|2268 (FGR)|2357 (FPR1)|2533 (FYB1)|3303 (HSPA1A)|3635 (INPP5D)|3659 (IRF1)|3684 (ITGAM)|3689 (ITGB2)|3937 (LCP2)|3958 (LGALS3)|4057 (LTF)|4067 (LYN)|4615 (MYD88)|4772 (NFATC1)|5293 (PIK3CD)|5336 (PLCG2)|5580 (PRKCD)|5788 (…
	M	GO|GO.BP	GO:0048583	regulation of response to stimulus	1.04915e-25	1.19561e-20	201	60 (ACTB)|113 (ADCY7)|154 (ADRB2)|215 (ABCD1)|388 (RHOB)|393 (ARHGAP4)|409 (ARRB2)|467 (ATF3)|598 (BCL2L1)|602 (BCL3)|637 (BID)|695 (BTK)|712 (C1QA)|713 (C1QB)|714 (C1QC)|718 (C3)|719 (C3AR1)|728 (C5AR1)|834 (CASP1)|920 (CD4)|923 (CD6)|929 (CD14)|933 (CD22)|942 (CD86)|972 (CD74)|1050 (CEBPA)|1230 (CCR1)|1240 (CMKLR1)|1435 (CSF1)|1436 (CSF1R)|1445 (CSK)|1520 (CTSS)|1535 (CYBA)|1796 (DOK1)|1827 (RC…
	M	GO|GO.BP	GO:0050865	regulation of cell activation	1.05966e-24	1.20759e-19	64	695 (BTK)|920 (CD4)|923 (CD6)|933 (CD22)|942 (CD86)|972 (CD74)|1050 (CEBPA)|1051 (CEBPB)|1445 (CSK)|1960 (EGR3)|2207 (FCER1G)|2242 (FES)|2268 (FGR)|3077 (HFE)|3109 (HLA-DMB)|3111 (HLA-DOA)|3162 (HMOX1)|3566 (IL4R)|3570 (IL6R)|3635 (INPP5D)|3659 (IRF1)|3684 (ITGAM)|3689 (ITGB2)|3956 (LGALS1)|3958 (LGALS3)|4067 (LYN)|4860 (PNP)|5341 (PLEK)|5580 (PRKCD)|5585 (PKN1)|5724 (PTAFR)|5788 (PTPRC)|5880 (RA…
	M	GO|GO.CC	GO:0044433	cytoplasmic vesicle part	2.09059e-24	2.38244e-19	104	154 (ADRB2)|162 (AP1B1)|388 (RHOB)|598 (BCL2L1)|718 (C3)|719 (C3AR1)|728 (C5AR1)|920 (CD4)|929 (CD14)|963 (CD53)|972 (CD74)|1471 (CST3)|1509 (CTSD)|1520 (CTSS)|1522 (CTSZ)|1535 (CYBA)|1536 (CYBB)|1794 (DOCK2)|2162 (F13A1)|2207 (FCER1G)|2212 (FCGR2A)|2215 (FCGR3B)|2268 (FGR)|2357 (FPR1)|2588 (GALNS)|2683 (B4GALT1)|2799 (GNS)|2896 (GRN)|3101 (HK3)|3109 (HLA-DMB)|3111 (HLA-DOA)|3303 (HSPA1A)|3683 (I…
	M	GO|GO.BP	GO:0007165	signal transduction	2.44098e-24	2.78174e-19	249	60 (ACTB)|113 (ADCY7)|140 (ADORA3)|154 (ADRB2)|388 (RHOB)|393 (ARHGAP4)|409 (ARRB2)|467 (ATF3)|598 (BCL2L1)|602 (BCL3)|637 (BID)|695 (BTK)|718 (C3)|719 (C3AR1)|728 (C5AR1)|834 (CASP1)|920 (CD4)|923 (CD6)|929 (CD14)|933 (CD22)|942 (CD86)|951 (CD37)|963 (CD53)|972 (CD74)|1040 (CDS1)|1050 (CEBPA)|1051 (CEBPB)|1230 (CCR1)|1240 (CMKLR1)|1435 (CSF1)|1436 (CSF1R)|1439 (CSF2RB)|1441 (CSF3R)|1445 (CSK)|15…
	M	GO|GO.BP	GO:0048534	hematopoietic or lymphoid organ development	4.12694e-24	4.70307e-19	77	602 (BCL3)|695 (BTK)|714 (C1QC)|920 (CD4)|942 (CD86)|972 (CD74)|1050 (CEBPA)|1051 (CEBPB)|1230 (CCR1)|1435 (CSF1)|1436 (CSF1R)|1441 (CSF3R)|1777 (DNASE2)|1794 (DOCK2)|1960 (EGR3)|2124 (EVI2B)|2185 (PTK2B)|2207 (FCER1G)|2242 (FES)|2872 (MKNK2)|3059 (HCLS1)|3111 (HLA-DOA)|3303 (HSPA1A)|3566 (IL4R)|3635 (INPP5D)|3659 (IRF1)|3726 (JUNB)|3955 (LFNG)|3956 (LGALS1)|3958 (LGALS3)|4057 (LTF)|4066 (LYL1)|4…
	M	GO|GO.BP	GO:0007154	cell communication	6.92315e-24	7.88962e-19	261	60 (ACTB)|113 (ADCY7)|140 (ADORA3)|154 (ADRB2)|388 (RHOB)|393 (ARHGAP4)|409 (ARRB2)|467 (ATF3)|598 (BCL2L1)|602 (BCL3)|637 (BID)|695 (BTK)|712 (C1QA)|718 (C3)|719 (C3AR1)|728 (C5AR1)|834 (CASP1)|920 (CD4)|923 (CD6)|929 (CD14)|933 (CD22)|942 (CD86)|951 (CD37)|963 (CD53)|972 (CD74)|1040 (CDS1)|1050 (CEBPA)|1051 (CEBPB)|1230 (CCR1)|1240 (CMKLR1)|1435 (CSF1)|1436 (CSF1R)|1439 (CSF2RB)|1441 (CSF3R)|14…
	M	GO|GO.BP	GO:0002520	immune system development	7.50837e-24	8.55653e-19	79	602 (BCL3)|695 (BTK)|714 (C1QC)|920 (CD4)|942 (CD86)|972 (CD74)|1050 (CEBPA)|1051 (CEBPB)|1230 (CCR1)|1435 (CSF1)|1436 (CSF1R)|1441 (CSF3R)|1777 (DNASE2)|1794 (DOCK2)|1960 (EGR3)|2124 (EVI2B)|2185 (PTK2B)|2207 (FCER1G)|2242 (FES)|2872 (MKNK2)|3059 (HCLS1)|3111 (HLA-DOA)|3303 (HSPA1A)|3566 (IL4R)|3635 (INPP5D)|3659 (IRF1)|3726 (JUNB)|3955 (LFNG)|3956 (LGALS1)|3958 (LGALS3)|4057 (LTF)|4066 (LYL1)|4…
	M	GO|GO.BP	GO:0030097	hemopoiesis	1.92318e-23	2.19165e-18	74	602 (BCL3)|695 (BTK)|714 (C1QC)|920 (CD4)|942 (CD86)|972 (CD74)|1050 (CEBPA)|1051 (CEBPB)|1230 (CCR1)|1435 (CSF1)|1436 (CSF1R)|1441 (CSF3R)|1777 (DNASE2)|1794 (DOCK2)|1960 (EGR3)|2124 (EVI2B)|2185 (PTK2B)|2207 (FCER1G)|2242 (FES)|2872 (MKNK2)|3059 (HCLS1)|3111 (HLA-DOA)|3303 (HSPA1A)|3566 (IL4R)|3635 (INPP5D)|3659 (IRF1)|3726 (JUNB)|3955 (LFNG)|3956 (LGALS1)|3958 (LGALS3)|4057 (LTF)|4066 (LYL1)|4…
	M	GO|GO.CC	GO:0031410	cytoplasmic vesicle	2.96778e-23	3.38208e-18	132	154 (ADRB2)|162 (AP1B1)|388 (RHOB)|409 (ARRB2)|598 (BCL2L1)|695 (BTK)|718 (C3)|719 (C3AR1)|728 (C5AR1)|752 (FMNL1)|920 (CD4)|929 (CD14)|933 (CD22)|963 (CD53)|972 (CD74)|1471 (CST3)|1509 (CTSD)|1520 (CTSS)|1522 (CTSZ)|1535 (CYBA)|1536 (CYBB)|1794 (DOCK2)|2162 (F13A1)|2207 (FCER1G)|2212 (FCGR2A)|2215 (FCGR3B)|2242 (FES)|2268 (FGR)|2357 (FPR1)|2588 (GALNS)|2683 (B4GALT1)|2799 (GNS)|2896 (GRN)|3073 (…
	M	GO|GO.CC	GO:0097708	intracellular vesicle	3.35004e-23	3.8177e-18	132	154 (ADRB2)|162 (AP1B1)|388 (RHOB)|409 (ARRB2)|598 (BCL2L1)|695 (BTK)|718 (C3)|719 (C3AR1)|728 (C5AR1)|752 (FMNL1)|920 (CD4)|929 (CD14)|933 (CD22)|963 (CD53)|972 (CD74)|1471 (CST3)|1509 (CTSD)|1520 (CTSS)|1522 (CTSZ)|1535 (CYBA)|1536 (CYBB)|1794 (DOCK2)|2162 (F13A1)|2207 (FCER1G)|2212 (FCGR2A)|2215 (FCGR3B)|2242 (FES)|2268 (FGR)|2357 (FPR1)|2588 (GALNS)|2683 (B4GALT1)|2799 (GNS)|2896 (GRN)|3073 (…
	M	GO|GO.BP	GO:0031347	regulation of defense response	3.54501e-23	4.0399e-18	71	113 (ADCY7)|215 (ABCD1)|409 (ARRB2)|695 (BTK)|712 (C1QA)|713 (C1QB)|714 (C1QC)|718 (C3)|719 (C3AR1)|728 (C5AR1)|923 (CD6)|929 (CD14)|1050 (CEBPA)|1520 (CTSS)|1535 (CYBA)|2099 (ESR1)|2207 (FCER1G)|2268 (FGR)|3077 (HFE)|3303 (HSPA1A)|3459 (IFNGR1)|3659 (IRF1)|3684 (ITGAM)|3689 (ITGB2)|4057 (LTF)|4067 (LYN)|4615 (MYD88)|5054 (SERPINE1)|5176 (SERPINF1)|5199 (CFP)|5294 (PIK3CG)|5336 (PLCG2)|5580 (PRKC…
	M	GO|GO.BP	GO:0023052	signaling	3.56501e-23	4.06268e-18	258	60 (ACTB)|113 (ADCY7)|140 (ADORA3)|154 (ADRB2)|388 (RHOB)|393 (ARHGAP4)|409 (ARRB2)|467 (ATF3)|598 (BCL2L1)|602 (BCL3)|637 (BID)|695 (BTK)|712 (C1QA)|718 (C3)|719 (C3AR1)|728 (C5AR1)|834 (CASP1)|920 (CD4)|923 (CD6)|929 (CD14)|933 (CD22)|942 (CD86)|951 (CD37)|963 (CD53)|972 (CD74)|1040 (CDS1)|1050 (CEBPA)|1051 (CEBPB)|1230 (CCR1)|1240 (CMKLR1)|1435 (CSF1)|1436 (CSF1R)|1439 (CSF2RB)|1441 (CSF3R)|14…
	M	GO|GO.BP	GO:0007159	leukocyte cell-cell adhesion	1.68674e-22	1.92221e-17	46	920 (CD4)|923 (CD6)|942 (CD86)|972 (CD74)|1051 (CEBPB)|1445 (CSK)|1960 (EGR3)|2650 (GCNT1)|3077 (HFE)|3109 (HLA-DMB)|3383 (ICAM1)|3566 (IL4R)|3570 (IL6R)|3659 (IRF1)|3683 (ITGAL)|3689 (ITGB2)|3956 (LGALS1)|3958 (LGALS3)|4067 (LYN)|4860 (PNP)|5724 (PTAFR)|5788 (PTPRC)|5880 (RAC2)|6279 (S100A8)|6280 (S100A9)|6347 (CCL2)|6404 (SELPLG)|6693 (SPN)|6793 (STK10)|7040 (TGFB1)|7409 (VAV1)|8764 (TNFRSF14)|…
	M	GO|GO.BP	GO:0051707	response to other organism	1.87593e-22	2.13781e-17	80	598 (BCL2L1)|602 (BCL3)|695 (BTK)|718 (C3)|728 (C5AR1)|834 (CASP1)|920 (CD4)|923 (CD6)|929 (CD14)|942 (CD86)|1051 (CEBPB)|1439 (CSF2RB)|1535 (CYBA)|2207 (FCER1G)|2268 (FGR)|2289 (FKBP5)|3159 (HMGA1)|3383 (ICAM1)|3459 (IFNGR1)|3566 (IL4R)|3570 (IL6R)|3587 (IL10RA)|3659 (IRF1)|3663 (IRF5)|3726 (JUNB)|4057 (LTF)|4067 (LYN)|4353 (MPO)|4360 (MRC1)|4615 (MYD88)|4791 (NFKB2)|4793 (NFKBIB)|4939 (OAS2)|50…
	M	GO|GO.BP	GO:0002694	regulation of leukocyte activation	1.88416e-22	2.14719e-17	59	695 (BTK)|920 (CD4)|923 (CD6)|933 (CD22)|942 (CD86)|972 (CD74)|1050 (CEBPA)|1051 (CEBPB)|1445 (CSK)|1960 (EGR3)|2207 (FCER1G)|2242 (FES)|2268 (FGR)|3077 (HFE)|3109 (HLA-DMB)|3111 (HLA-DOA)|3162 (HMOX1)|3566 (IL4R)|3570 (IL6R)|3635 (INPP5D)|3659 (IRF1)|3684 (ITGAM)|3689 (ITGB2)|3956 (LGALS1)|3958 (LGALS3)|4067 (LYN)|4860 (PNP)|5585 (PKN1)|5724 (PTAFR)|5788 (PTPRC)|5880 (RAC2)|6347 (CCL2)|6693 (SPN…
	M	GO|GO.BP	GO:0043207	response to external biotic stimulus	2.13265e-22	2.43036e-17	80	598 (BCL2L1)|602 (BCL3)|695 (BTK)|718 (C3)|728 (C5AR1)|834 (CASP1)|920 (CD4)|923 (CD6)|929 (CD14)|942 (CD86)|1051 (CEBPB)|1439 (CSF2RB)|1535 (CYBA)|2207 (FCER1G)|2268 (FGR)|2289 (FKBP5)|3159 (HMGA1)|3383 (ICAM1)|3459 (IFNGR1)|3566 (IL4R)|3570 (IL6R)|3587 (IL10RA)|3659 (IRF1)|3663 (IRF5)|3726 (JUNB)|4057 (LTF)|4067 (LYN)|4353 (MPO)|4360 (MRC1)|4615 (MYD88)|4791 (NFKB2)|4793 (NFKBIB)|4939 (OAS2)|50…
	M	GO|GO.BP	GO:0031349	positive regulation of defense response	2.25801e-22	2.57323e-17	52	409 (ARRB2)|695 (BTK)|718 (C3)|923 (CD6)|929 (CD14)|1050 (CEBPA)|1520 (CTSS)|1535 (CYBA)|2099 (ESR1)|2207 (FCER1G)|3077 (HFE)|3303 (HSPA1A)|3659 (IRF1)|3684 (ITGAM)|3689 (ITGB2)|4057 (LTF)|4067 (LYN)|4615 (MYD88)|5054 (SERPINE1)|5294 (PIK3CG)|5336 (PLCG2)|5580 (PRKCD)|5734 (PTGER4)|5970 (RELA)|5971 (RELB)|6279 (S100A8)|6280 (S100A9)|7052 (TGM2)|7096 (TLR1)|7097 (TLR2)|7100 (TLR5)|7128 (TNFAIP3)|7…
	M	GO|GO.CC	GO:0030141	secretory granule	2.26445e-22	2.58057e-17	73	718 (C3)|719 (C3AR1)|728 (C5AR1)|929 (CD14)|963 (CD53)|1471 (CST3)|1509 (CTSD)|1520 (CTSS)|1522 (CTSZ)|1535 (CYBA)|1536 (CYBB)|1794 (DOCK2)|2162 (F13A1)|2207 (FCER1G)|2212 (FCGR2A)|2215 (FCGR3B)|2268 (FGR)|2357 (FPR1)|2588 (GALNS)|2683 (B4GALT1)|2799 (GNS)|2896 (GRN)|3073 (HEXA)|3101 (HK3)|3303 (HSPA1A)|3683 (ITGAL)|3684 (ITGAM)|3687 (ITGAX)|3689 (ITGB2)|3958 (LGALS3)|3959 (LGALS3BP)|4057 (LTF)|4…
	M	GO|GO.BP	GO:0002521	leukocyte differentiation	3.31676e-22	3.77978e-17	56	602 (BCL3)|695 (BTK)|714 (C1QC)|920 (CD4)|942 (CD86)|972 (CD74)|1050 (CEBPA)|1051 (CEBPB)|1230 (CCR1)|1435 (CSF1)|1436 (CSF1R)|1794 (DOCK2)|1960 (EGR3)|2124 (EVI2B)|2185 (PTK2B)|2207 (FCER1G)|3059 (HCLS1)|3111 (HLA-DOA)|3566 (IL4R)|3635 (INPP5D)|3659 (IRF1)|3726 (JUNB)|3955 (LFNG)|3956 (LGALS1)|4057 (LTF)|4066 (LYL1)|4067 (LYN)|4860 (PNP)|5293 (PIK3CD)|5336 (PLCG2)|5452 (POU2F2)|5734 (PTGER4)|578…
	M	GO|GO.BP	GO:0009607	response to biotic stimulus	3.42362e-22	3.90156e-17	81	598 (BCL2L1)|602 (BCL3)|695 (BTK)|718 (C3)|728 (C5AR1)|834 (CASP1)|920 (CD4)|923 (CD6)|929 (CD14)|942 (CD86)|1051 (CEBPB)|1439 (CSF2RB)|1535 (CYBA)|2207 (FCER1G)|2268 (FGR)|2289 (FKBP5)|3159 (HMGA1)|3383 (ICAM1)|3459 (IFNGR1)|3566 (IL4R)|3570 (IL6R)|3587 (IL10RA)|3659 (IRF1)|3663 (IRF5)|3726 (JUNB)|4057 (LTF)|4067 (LYN)|4353 (MPO)|4360 (MRC1)|4615 (MYD88)|4791 (NFKB2)|4793 (NFKBIB)|4939 (OAS2)|50…
	M	GO|GO.BP	GO:0006810	transport	3.43409e-22	3.91349e-17	217	60 (ACTB)|154 (ADRB2)|162 (AP1B1)|215 (ABCD1)|388 (RHOB)|409 (ARRB2)|598 (BCL2L1)|602 (BCL3)|637 (BID)|695 (BTK)|718 (C3)|719 (C3AR1)|728 (C5AR1)|834 (CASP1)|920 (CD4)|923 (CD6)|929 (CD14)|933 (CD22)|963 (CD53)|972 (CD74)|1051 (CEBPB)|1230 (CCR1)|1436 (CSF1R)|1445 (CSK)|1471 (CST3)|1509 (CTSD)|1520 (CTSS)|1522 (CTSZ)|1535 (CYBA)|1536 (CYBB)|1794 (DOCK2)|2055 (CLN8)|2162 (F13A1)|2185 (PTK2B)|2207 …
	M	GO|GO.BP	GO:0048518	positive regulation of biological process	4.52614e-22	5.15799e-17	244	60 (ACTB)|154 (ADRB2)|215 (ABCD1)|388 (RHOB)|393 (ARHGAP4)|409 (ARRB2)|463 (ZFHX3)|467 (ATF3)|598 (BCL2L1)|602 (BCL3)|637 (BID)|694 (BTG1)|695 (BTK)|712 (C1QA)|713 (C1QB)|714 (C1QC)|718 (C3)|719 (C3AR1)|728 (C5AR1)|834 (CASP1)|920 (CD4)|923 (CD6)|929 (CD14)|933 (CD22)|942 (CD86)|963 (CD53)|972 (CD74)|1050 (CEBPA)|1051 (CEBPB)|1230 (CCR1)|1240 (CMKLR1)|1435 (CSF1)|1436 (CSF1R)|1445 (CSK)|1520 (CTS…
	M	GO|GO.BP	GO:0002758	innate immune response-activating signal transduction	5.30479e-22	6.04534e-17	39	409 (ARRB2)|695 (BTK)|929 (CD14)|1520 (CTSS)|1535 (CYBA)|2099 (ESR1)|2207 (FCER1G)|3303 (HSPA1A)|3659 (IRF1)|3684 (ITGAM)|3689 (ITGB2)|4057 (LTF)|4067 (LYN)|4615 (MYD88)|5336 (PLCG2)|5580 (PRKCD)|5970 (RELA)|5971 (RELB)|6279 (S100A8)|6280 (S100A9)|7096 (TLR1)|7097 (TLR2)|7100 (TLR5)|7128 (TNFAIP3)|7867 (MAPKAPK3)|9261 (MAPKAPK2)|10333 (TLR6)|10695 (CNPY3)|30835 (CD209)|51284 (TLR7)|63906 (GPATCH3…
	M	GO|GO.BP	GO:0051716	cellular response to stimulus	1.00395e-21	1.1441e-16	279	60 (ACTB)|113 (ADCY7)|140 (ADORA3)|154 (ADRB2)|215 (ABCD1)|241 (ALOX5AP)|388 (RHOB)|393 (ARHGAP4)|409 (ARRB2)|467 (ATF3)|598 (BCL2L1)|602 (BCL3)|637 (BID)|695 (BTK)|718 (C3)|719 (C3AR1)|728 (C5AR1)|834 (CASP1)|920 (CD4)|923 (CD6)|929 (CD14)|933 (CD22)|942 (CD86)|951 (CD37)|963 (CD53)|972 (CD74)|1040 (CDS1)|1050 (CEBPA)|1051 (CEBPB)|1230 (CCR1)|1240 (CMKLR1)|1435 (CSF1)|1436 (CSF1R)|1439 (CSF2RB)|…
	M	GO|GO.BP	GO:0007166	cell surface receptor signaling pathway	1.8218e-21	2.07613e-16	152	60 (ACTB)|140 (ADORA3)|154 (ADRB2)|409 (ARRB2)|467 (ATF3)|598 (BCL2L1)|637 (BID)|695 (BTK)|718 (C3)|719 (C3AR1)|728 (C5AR1)|834 (CASP1)|920 (CD4)|923 (CD6)|929 (CD14)|933 (CD22)|942 (CD86)|951 (CD37)|963 (CD53)|972 (CD74)|1050 (CEBPA)|1230 (CCR1)|1240 (CMKLR1)|1435 (CSF1)|1436 (CSF1R)|1439 (CSF2RB)|1441 (CSF3R)|1445 (CSK)|1535 (CYBA)|1536 (CYBB)|1796 (DOK1)|2099 (ESR1)|2162 (F13A1)|2185 (PTK2B)|2…
	M	GO|GO.BP	GO:0034097	response to cytokine	2.17451e-21	2.47807e-16	84	598 (BCL2L1)|695 (BTK)|834 (CASP1)|920 (CD4)|929 (CD14)|942 (CD86)|972 (CD74)|1050 (CEBPA)|1051 (CEBPB)|1230 (CCR1)|1240 (CMKLR1)|1435 (CSF1)|1436 (CSF1R)|1439 (CSF2RB)|1441 (CSF3R)|1535 (CYBA)|1796 (DOK1)|2162 (F13A1)|2185 (PTK2B)|2207 (FCER1G)|2357 (FPR1)|3059 (HCLS1)|3099 (HK2)|3162 (HMOX1)|3303 (HSPA1A)|3383 (ICAM1)|3459 (IFNGR1)|3566 (IL4R)|3570 (IL6R)|3587 (IL10RA)|3603 (IL16)|3635 (INPP5D)…
	M	GO|GO.BP	GO:0051234	establishment of localization	2.62982e-21	2.99694e-16	218	60 (ACTB)|154 (ADRB2)|162 (AP1B1)|215 (ABCD1)|388 (RHOB)|409 (ARRB2)|598 (BCL2L1)|602 (BCL3)|637 (BID)|695 (BTK)|718 (C3)|719 (C3AR1)|728 (C5AR1)|834 (CASP1)|920 (CD4)|923 (CD6)|929 (CD14)|933 (CD22)|963 (CD53)|972 (CD74)|1051 (CEBPB)|1230 (CCR1)|1436 (CSF1R)|1445 (CSK)|1471 (CST3)|1509 (CTSD)|1520 (CTSS)|1522 (CTSZ)|1535 (CYBA)|1536 (CYBB)|1794 (DOCK2)|2055 (CLN8)|2162 (F13A1)|2185 (PTK2B)|2207 …
	M	GO|GO.BP	GO:0042110	T cell activation	2.77555e-21	3.16301e-16	52	602 (BCL3)|920 (CD4)|923 (CD6)|942 (CD86)|972 (CD74)|1051 (CEBPB)|1445 (CSK)|1794 (DOCK2)|1960 (EGR3)|2000 (ELF4)|2207 (FCER1G)|3077 (HFE)|3109 (HLA-DMB)|3111 (HLA-DOA)|3383 (ICAM1)|3566 (IL4R)|3570 (IL6R)|3659 (IRF1)|3683 (ITGAL)|3936 (LCP1)|3955 (LFNG)|3956 (LGALS1)|3958 (LGALS3)|4067 (LYN)|4860 (PNP)|5293 (PIK3CD)|5294 (PIK3CG)|5734 (PTGER4)|5788 (PTPRC)|5880 (RAC2)|5971 (RELB)|6347 (CCL2)|669…
	M	GO|GO.BP	GO:0051179	localization	3.56326e-21	4.06069e-16	255	60 (ACTB)|140 (ADORA3)|154 (ADRB2)|162 (AP1B1)|215 (ABCD1)|388 (RHOB)|393 (ARHGAP4)|409 (ARRB2)|598 (BCL2L1)|602 (BCL3)|637 (BID)|694 (BTG1)|695 (BTK)|718 (C3)|719 (C3AR1)|728 (C5AR1)|752 (FMNL1)|834 (CASP1)|920 (CD4)|923 (CD6)|929 (CD14)|933 (CD22)|963 (CD53)|972 (CD74)|1051 (CEBPB)|1230 (CCR1)|1240 (CMKLR1)|1435 (CSF1)|1436 (CSF1R)|1441 (CSF3R)|1445 (CSK)|1471 (CST3)|1509 (CTSD)|1520 (CTSS)|152…
	M	GO|GO.BP	GO:0009617	response to bacterium	3.80561e-21	4.33687e-16	64	602 (BCL3)|718 (C3)|728 (C5AR1)|834 (CASP1)|920 (CD4)|923 (CD6)|929 (CD14)|942 (CD86)|1051 (CEBPB)|1439 (CSF2RB)|1535 (CYBA)|2207 (FCER1G)|2268 (FGR)|2289 (FKBP5)|3383 (ICAM1)|3570 (IL6R)|3587 (IL10RA)|3663 (IRF5)|3726 (JUNB)|4057 (LTF)|4067 (LYN)|4353 (MPO)|4360 (MRC1)|4615 (MYD88)|4791 (NFKB2)|4793 (NFKBIB)|4939 (OAS2)|5054 (SERPINE1)|5199 (CFP)|5336 (PLCG2)|5580 (PRKCD)|5724 (PTAFR)|5734 (PTGE…
	M	GO|GO.CC	GO:0098805	whole membrane	5.59944e-21	6.38112e-16	104	154 (ADRB2)|162 (AP1B1)|215 (ABCD1)|388 (RHOB)|598 (BCL2L1)|637 (BID)|695 (BTK)|719 (C3AR1)|728 (C5AR1)|920 (CD4)|929 (CD14)|963 (CD53)|972 (CD74)|1445 (CSK)|1509 (CTSD)|1535 (CYBA)|1536 (CYBB)|1820 (ARID3A)|2185 (PTK2B)|2207 (FCER1G)|2212 (FCGR2A)|2215 (FCGR3B)|2357 (FPR1)|2683 (B4GALT1)|3099 (HK2)|3109 (HLA-DMB)|3111 (HLA-DOA)|3162 (HMOX1)|3383 (ICAM1)|3635 (INPP5D)|3683 (ITGAL)|3684 (ITGAM)|36…
	M	GO|GO.BP	GO:0002218	activation of innate immune response	9.76857e-21	1.11323e-15	39	409 (ARRB2)|695 (BTK)|929 (CD14)|1520 (CTSS)|1535 (CYBA)|2099 (ESR1)|2207 (FCER1G)|3303 (HSPA1A)|3659 (IRF1)|3684 (ITGAM)|3689 (ITGB2)|4057 (LTF)|4067 (LYN)|4615 (MYD88)|5336 (PLCG2)|5580 (PRKCD)|5970 (RELA)|5971 (RELB)|6279 (S100A8)|6280 (S100A9)|7096 (TLR1)|7097 (TLR2)|7100 (TLR5)|7128 (TNFAIP3)|7867 (MAPKAPK3)|9261 (MAPKAPK2)|10333 (TLR6)|10695 (CNPY3)|30835 (CD209)|51284 (TLR7)|63906 (GPATCH3…
	M	GO|GO.BP	GO:0045088	regulation of innate immune response	1.67687e-20	1.91096e-15	46	409 (ARRB2)|695 (BTK)|929 (CD14)|1520 (CTSS)|1535 (CYBA)|2099 (ESR1)|2207 (FCER1G)|2268 (FGR)|3077 (HFE)|3303 (HSPA1A)|3459 (IFNGR1)|3659 (IRF1)|3684 (ITGAM)|3689 (ITGB2)|4057 (LTF)|4067 (LYN)|4615 (MYD88)|5336 (PLCG2)|5580 (PRKCD)|5770 (PTPN1)|5970 (RELA)|5971 (RELB)|6279 (S100A8)|6280 (S100A9)|7096 (TLR1)|7097 (TLR2)|7100 (TLR5)|7128 (TNFAIP3)|7409 (VAV1)|7867 (MAPKAPK3)|9021 (SOCS3)|9261 (MAPK…
	M	GO|GO.BP	GO:0002221	pattern recognition receptor signaling pathway	3.88703e-20	4.42966e-15	33	409 (ARRB2)|695 (BTK)|929 (CD14)|1520 (CTSS)|1535 (CYBA)|2099 (ESR1)|3303 (HSPA1A)|3659 (IRF1)|3684 (ITGAM)|3689 (ITGB2)|4057 (LTF)|4067 (LYN)|4615 (MYD88)|5970 (RELA)|6279 (S100A8)|6280 (S100A9)|7096 (TLR1)|7097 (TLR2)|7100 (TLR5)|7128 (TNFAIP3)|7867 (MAPKAPK3)|9261 (MAPKAPK2)|10333 (TLR6)|10695 (CNPY3)|51284 (TLR7)|63906 (GPATCH3)|64581 (CLEC7A)|79132 (DHX58)|79155 (TNIP2)|81622 (UNC93B1)|84868…
	M	GO|GO.CC	GO:0099503	secretory vesicle	4.05827e-20	4.6248e-15	76	598 (BCL2L1)|718 (C3)|719 (C3AR1)|728 (C5AR1)|929 (CD14)|963 (CD53)|1471 (CST3)|1509 (CTSD)|1520 (CTSS)|1522 (CTSZ)|1535 (CYBA)|1536 (CYBB)|1794 (DOCK2)|2162 (F13A1)|2207 (FCER1G)|2212 (FCGR2A)|2215 (FCGR3B)|2268 (FGR)|2357 (FPR1)|2588 (GALNS)|2683 (B4GALT1)|2799 (GNS)|2896 (GRN)|3073 (HEXA)|3101 (HK3)|3303 (HSPA1A)|3683 (ITGAL)|3684 (ITGAM)|3687 (ITGAX)|3689 (ITGB2)|3958 (LGALS3)|3959 (LGALS3BP)…
	M	GO|GO.BP	GO:0071345	cellular response to cytokine stimulus	5.06067e-20	5.76714e-15	78	598 (BCL2L1)|695 (BTK)|834 (CASP1)|920 (CD4)|942 (CD86)|972 (CD74)|1050 (CEBPA)|1051 (CEBPB)|1230 (CCR1)|1240 (CMKLR1)|1435 (CSF1)|1436 (CSF1R)|1439 (CSF2RB)|1441 (CSF3R)|1535 (CYBA)|1796 (DOK1)|2162 (F13A1)|2185 (PTK2B)|2207 (FCER1G)|2357 (FPR1)|3059 (HCLS1)|3099 (HK2)|3162 (HMOX1)|3303 (HSPA1A)|3383 (ICAM1)|3459 (IFNGR1)|3566 (IL4R)|3570 (IL6R)|3587 (IL10RA)|3603 (IL16)|3635 (INPP5D)|3659 (IRF1…
	M	GO|GO.BP	GO:0010033	response to organic substance	5.30191e-20	6.04205e-15	155	60 (ACTB)|113 (ADCY7)|154 (ADRB2)|409 (ARRB2)|463 (ZFHX3)|467 (ATF3)|598 (BCL2L1)|694 (BTG1)|695 (BTK)|728 (C5AR1)|834 (CASP1)|920 (CD4)|923 (CD6)|929 (CD14)|942 (CD86)|972 (CD74)|1050 (CEBPA)|1051 (CEBPB)|1230 (CCR1)|1240 (CMKLR1)|1435 (CSF1)|1436 (CSF1R)|1439 (CSF2RB)|1441 (CSF3R)|1445 (CSK)|1520 (CTSS)|1535 (CYBA)|1536 (CYBB)|1796 (DOK1)|1960 (EGR3)|2099 (ESR1)|2162 (F13A1)|2185 (PTK2B)|2207 (…
	M	GO|GO.BP	GO:0080134	regulation of response to stress	7.14387e-20	8.14116e-15	95	113 (ADCY7)|215 (ABCD1)|409 (ARRB2)|598 (BCL2L1)|637 (BID)|695 (BTK)|712 (C1QA)|713 (C1QB)|714 (C1QC)|718 (C3)|719 (C3AR1)|728 (C5AR1)|923 (CD6)|929 (CD14)|972 (CD74)|1050 (CEBPA)|1520 (CTSS)|1535 (CYBA)|2099 (ESR1)|2185 (PTK2B)|2207 (FCER1G)|2268 (FGR)|3077 (HFE)|3159 (HMGA1)|3303 (HSPA1A)|3459 (IFNGR1)|3659 (IRF1)|3684 (ITGAM)|3689 (ITGB2)|4057 (LTF)|4067 (LYN)|4615 (MYD88)|5054 (SERPINE1)|5176…
	M	GO|GO.BP	GO:0035556	intracellular signal transduction	9.19385e-20	1.04773e-14	143	113 (ADCY7)|154 (ADRB2)|388 (RHOB)|393 (ARHGAP4)|409 (ARRB2)|467 (ATF3)|598 (BCL2L1)|602 (BCL3)|637 (BID)|695 (BTK)|728 (C5AR1)|834 (CASP1)|920 (CD4)|929 (CD14)|933 (CD22)|942 (CD86)|972 (CD74)|1051 (CEBPB)|1230 (CCR1)|1240 (CMKLR1)|1435 (CSF1)|1436 (CSF1R)|1439 (CSF2RB)|1445 (CSK)|1794 (DOCK2)|1796 (DOK1)|1820 (ARID3A)|1827 (RCAN1)|1844 (DUSP2)|2099 (ESR1)|2185 (PTK2B)|2268 (FGR)|2357 (FPR1)|253…
	M	GO|GO.BP	GO:0050867	positive regulation of cell activation	1.33814e-19	1.52494e-14	46	695 (BTK)|920 (CD4)|923 (CD6)|942 (CD86)|972 (CD74)|1050 (CEBPA)|1445 (CSK)|1960 (EGR3)|2207 (FCER1G)|2268 (FGR)|3109 (HLA-DMB)|3566 (IL4R)|3570 (IL6R)|3635 (INPP5D)|3684 (ITGAM)|3689 (ITGB2)|3956 (LGALS1)|4067 (LYN)|4860 (PNP)|5341 (PLEK)|5724 (PTAFR)|5788 (PTPRC)|6195 (RPS6KA1)|6347 (CCL2)|6665 (SOX15)|6778 (STAT6)|7040 (TGFB1)|7409 (VAV1)|8673 (VAMP8)|8764 (TNFRSF14)|8808 (IL1RL2)|9308 (CD83)|…
	M	GO|GO.CC	GO:0005737	cytoplasm	1.51668e-19	1.7284e-14	368	35 (ACADS)|60 (ACTB)|154 (ADRB2)|162 (AP1B1)|215 (ABCD1)|241 (ALOX5AP)|388 (RHOB)|393 (ARHGAP4)|409 (ARRB2)|463 (ZFHX3)|598 (BCL2L1)|602 (BCL3)|637 (BID)|694 (BTG1)|695 (BTK)|718 (C3)|719 (C3AR1)|728 (C5AR1)|752 (FMNL1)|834 (CASP1)|920 (CD4)|929 (CD14)|933 (CD22)|963 (CD53)|972 (CD74)|1040 (CDS1)|1051 (CEBPB)|1230 (CCR1)|1293 (COL6A3)|1435 (CSF1)|1436 (CSF1R)|1445 (CSK)|1471 (CST3)|1509 (CTSD)|15…
	M	GO|GO.BP	GO:0045089	positive regulation of innate immune response	3.29297e-19	3.75267e-14	41	409 (ARRB2)|695 (BTK)|929 (CD14)|1520 (CTSS)|1535 (CYBA)|2099 (ESR1)|2207 (FCER1G)|3077 (HFE)|3303 (HSPA1A)|3659 (IRF1)|3684 (ITGAM)|3689 (ITGB2)|4057 (LTF)|4067 (LYN)|4615 (MYD88)|5336 (PLCG2)|5580 (PRKCD)|5970 (RELA)|5971 (RELB)|6279 (S100A8)|6280 (S100A9)|7096 (TLR1)|7097 (TLR2)|7100 (TLR5)|7128 (TNFAIP3)|7409 (VAV1)|7867 (MAPKAPK3)|9261 (MAPKAPK2)|10333 (TLR6)|10695 (CNPY3)|30835 (CD209)|5128…
	M	GO|GO.BP	GO:0002224	toll-like receptor signaling pathway	4.54236e-19	5.17648e-14	28	409 (ARRB2)|695 (BTK)|929 (CD14)|1520 (CTSS)|1535 (CYBA)|2099 (ESR1)|3659 (IRF1)|3684 (ITGAM)|3689 (ITGB2)|4057 (LTF)|4067 (LYN)|4615 (MYD88)|6279 (S100A8)|6280 (S100A9)|7096 (TLR1)|7097 (TLR2)|7100 (TLR5)|7128 (TNFAIP3)|7867 (MAPKAPK3)|9261 (MAPKAPK2)|10333 (TLR6)|10695 (CNPY3)|51284 (TLR7)|79155 (TNIP2)|81622 (UNC93B1)|84868 (HAVCR2)|118788 (PIK3AP1)|148022 (TICAM1)
	M	GO|GO.BP	GO:0071310	cellular response to organic substance	4.97035e-19	5.66421e-14	134	60 (ACTB)|113 (ADCY7)|154 (ADRB2)|409 (ARRB2)|467 (ATF3)|598 (BCL2L1)|695 (BTK)|834 (CASP1)|920 (CD4)|923 (CD6)|929 (CD14)|942 (CD86)|972 (CD74)|1050 (CEBPA)|1051 (CEBPB)|1230 (CCR1)|1240 (CMKLR1)|1435 (CSF1)|1436 (CSF1R)|1439 (CSF2RB)|1441 (CSF3R)|1445 (CSK)|1520 (CTSS)|1535 (CYBA)|1536 (CYBB)|1796 (DOK1)|1960 (EGR3)|2099 (ESR1)|2162 (F13A1)|2185 (PTK2B)|2207 (FCER1G)|2350 (FOLR2)|2357 (FPR1)|27…
	M	GO|GO.BP	GO:0032101	regulation of response to external stimulus	5.69703e-19	6.49234e-14	68	113 (ADCY7)|215 (ABCD1)|695 (BTK)|712 (C1QA)|713 (C1QB)|714 (C1QC)|718 (C3)|719 (C3AR1)|728 (C5AR1)|923 (CD6)|972 (CD74)|1050 (CEBPA)|1230 (CCR1)|1240 (CMKLR1)|1435 (CSF1)|1535 (CYBA)|2099 (ESR1)|2185 (PTK2B)|2207 (FCER1G)|3570 (IL6R)|3603 (IL16)|3684 (ITGAM)|3689 (ITGB2)|4057 (LTF)|4067 (LYN)|4615 (MYD88)|4836 (NMT1)|5054 (SERPINE1)|5176 (SERPINF1)|5199 (CFP)|5294 (PIK3CG)|5341 (PLEK)|5580 (PRKC…
	M	GO|GO.BP	GO:0048522	positive regulation of cellular process	6.18024e-19	7.043e-14	216	154 (ADRB2)|215 (ABCD1)|388 (RHOB)|393 (ARHGAP4)|409 (ARRB2)|463 (ZFHX3)|467 (ATF3)|598 (BCL2L1)|602 (BCL3)|637 (BID)|694 (BTG1)|695 (BTK)|718 (C3)|719 (C3AR1)|728 (C5AR1)|834 (CASP1)|920 (CD4)|923 (CD6)|929 (CD14)|942 (CD86)|963 (CD53)|972 (CD74)|1050 (CEBPA)|1051 (CEBPB)|1230 (CCR1)|1240 (CMKLR1)|1435 (CSF1)|1436 (CSF1R)|1445 (CSK)|1522 (CTSZ)|1535 (CYBA)|1536 (CYBB)|1794 (DOCK2)|1796 (DOK1)|18…
	M	GO|GO.BP	GO:0022610	biological adhesion	7.07634e-19	8.0642e-14	91	60 (ACTB)|388 (RHOB)|463 (ZFHX3)|920 (CD4)|923 (CD6)|933 (CD22)|942 (CD86)|972 (CD74)|1051 (CEBPB)|1230 (CCR1)|1293 (COL6A3)|1435 (CSF1)|1441 (CSF3R)|1445 (CSK)|1960 (EGR3)|2185 (PTK2B)|2242 (FES)|2350 (FOLR2)|2650 (GCNT1)|2683 (B4GALT1)|3077 (HFE)|3109 (HLA-DMB)|3383 (ICAM1)|3566 (IL4R)|3570 (IL6R)|3659 (IRF1)|3682 (ITGAE)|3683 (ITGAL)|3684 (ITGAM)|3687 (ITGAX)|3689 (ITGB2)|3693 (ITGB5)|3956 (LG…
	M	GO|GO.BP	GO:0051239	regulation of multicellular organismal process	1.52131e-18	1.73368e-13	149	113 (ADCY7)|140 (ADORA3)|154 (ADRB2)|215 (ABCD1)|388 (RHOB)|393 (ARHGAP4)|409 (ARRB2)|463 (ZFHX3)|602 (BCL3)|694 (BTG1)|695 (BTK)|714 (C1QC)|718 (C3)|719 (C3AR1)|728 (C5AR1)|834 (CASP1)|920 (CD4)|923 (CD6)|929 (CD14)|942 (CD86)|972 (CD74)|1050 (CEBPA)|1051 (CEBPB)|1230 (CCR1)|1240 (CMKLR1)|1435 (CSF1)|1436 (CSF1R)|1441 (CSF3R)|1445 (CSK)|1471 (CST3)|1522 (CTSZ)|1535 (CYBA)|1536 (CYBB)|1960 (EGR3)…
	M	GO|GO.BP	GO:0007155	cell adhesion	1.61468e-18	1.84009e-13	90	60 (ACTB)|388 (RHOB)|463 (ZFHX3)|920 (CD4)|923 (CD6)|933 (CD22)|942 (CD86)|972 (CD74)|1051 (CEBPB)|1230 (CCR1)|1293 (COL6A3)|1435 (CSF1)|1441 (CSF3R)|1445 (CSK)|1960 (EGR3)|2185 (PTK2B)|2242 (FES)|2350 (FOLR2)|2650 (GCNT1)|2683 (B4GALT1)|3077 (HFE)|3109 (HLA-DMB)|3383 (ICAM1)|3566 (IL4R)|3570 (IL6R)|3659 (IRF1)|3682 (ITGAE)|3683 (ITGAL)|3684 (ITGAM)|3687 (ITGAX)|3689 (ITGB2)|3693 (ITGB5)|3956 (LG…
	M	GO|GO.CC	GO:0005764	lysosome	1.71307e-18	1.95222e-13	59	154 (ADRB2)|162 (AP1B1)|215 (ABCD1)|695 (BTK)|718 (C3)|719 (C3AR1)|972 (CD74)|1509 (CTSD)|1520 (CTSS)|1522 (CTSZ)|1777 (DNASE2)|2357 (FPR1)|2588 (GALNS)|2683 (B4GALT1)|2799 (GNS)|2896 (GRN)|3073 (HEXA)|3109 (HLA-DMB)|3111 (HLA-DOA)|4067 (LYN)|4353 (MPO)|4669 (NAGLU)|4688 (NCF2)|4689 (NCF4)|4758 (NEU1)|5293 (PIK3CD)|5294 (PIK3CG)|5580 (PRKCD)|5641 (LGMN)|6039 (RNASE6)|6948 (TCN2)|7107 (GPR137B)|71…
	M	GO|GO.CC	GO:0000323	lytic vacuole	1.84073e-18	2.09769e-13	59	154 (ADRB2)|162 (AP1B1)|215 (ABCD1)|695 (BTK)|718 (C3)|719 (C3AR1)|972 (CD74)|1509 (CTSD)|1520 (CTSS)|1522 (CTSZ)|1777 (DNASE2)|2357 (FPR1)|2588 (GALNS)|2683 (B4GALT1)|2799 (GNS)|2896 (GRN)|3073 (HEXA)|3109 (HLA-DMB)|3111 (HLA-DOA)|4067 (LYN)|4353 (MPO)|4669 (NAGLU)|4688 (NCF2)|4689 (NCF4)|4758 (NEU1)|5293 (PIK3CD)|5294 (PIK3CG)|5580 (PRKCD)|5641 (LGMN)|6039 (RNASE6)|6948 (TCN2)|7107 (GPR137B)|71…
	M	GO|GO.BP	GO:0009967	positive regulation of signal transduction	6.4192e-18	7.31532e-13	97	154 (ADRB2)|393 (ARHGAP4)|409 (ARRB2)|467 (ATF3)|598 (BCL2L1)|637 (BID)|718 (C3)|728 (C5AR1)|834 (CASP1)|920 (CD4)|929 (CD14)|942 (CD86)|972 (CD74)|1230 (CCR1)|1435 (CSF1)|1436 (CSF1R)|1445 (CSK)|1535 (CYBA)|1796 (DOK1)|2099 (ESR1)|2185 (PTK2B)|2268 (FGR)|2357 (FPR1)|3059 (HCLS1)|3077 (HFE)|3162 (HMOX1)|3303 (HSPA1A)|3383 (ICAM1)|3570 (IL6R)|3927 (LASP1)|3955 (LFNG)|3956 (LGALS1)|4057 (LTF)|4067 …
	M	GO|GO.BP	GO:0070887	cellular response to chemical stimulus	6.87591e-18	7.83578e-13	149	60 (ACTB)|113 (ADCY7)|154 (ADRB2)|215 (ABCD1)|241 (ALOX5AP)|388 (RHOB)|409 (ARRB2)|467 (ATF3)|598 (BCL2L1)|695 (BTK)|719 (C3AR1)|728 (C5AR1)|834 (CASP1)|920 (CD4)|923 (CD6)|929 (CD14)|942 (CD86)|972 (CD74)|1050 (CEBPA)|1051 (CEBPB)|1230 (CCR1)|1240 (CMKLR1)|1435 (CSF1)|1436 (CSF1R)|1439 (CSF2RB)|1441 (CSF3R)|1445 (CSK)|1520 (CTSS)|1535 (CYBA)|1536 (CYBB)|1796 (DOK1)|1960 (EGR3)|2099 (ESR1)|2162 (…
	M	GO|GO.BP	GO:0002696	positive regulation of leukocyte activation	8.42258e-18	9.59837e-13	43	695 (BTK)|920 (CD4)|923 (CD6)|942 (CD86)|972 (CD74)|1050 (CEBPA)|1445 (CSK)|1960 (EGR3)|2207 (FCER1G)|2268 (FGR)|3109 (HLA-DMB)|3566 (IL4R)|3570 (IL6R)|3635 (INPP5D)|3684 (ITGAM)|3689 (ITGB2)|3956 (LGALS1)|4067 (LYN)|4860 (PNP)|5724 (PTAFR)|5788 (PTPRC)|6347 (CCL2)|6778 (STAT6)|7040 (TGFB1)|7409 (VAV1)|8673 (VAMP8)|8764 (TNFRSF14)|8808 (IL1RL2)|9308 (CD83)|10148 (EBI3)|10333 (TLR6)|11151 (CORO1A)…
	M	GO|GO.BP	GO:0019221	cytokine-mediated signaling pathway	8.6001e-18	9.80067e-13	61	598 (BCL2L1)|834 (CASP1)|920 (CD4)|942 (CD86)|972 (CD74)|1050 (CEBPA)|1230 (CCR1)|1240 (CMKLR1)|1435 (CSF1)|1436 (CSF1R)|1439 (CSF2RB)|1441 (CSF3R)|1796 (DOK1)|2162 (F13A1)|2185 (PTK2B)|2207 (FCER1G)|2357 (FPR1)|3162 (HMOX1)|3303 (HSPA1A)|3383 (ICAM1)|3459 (IFNGR1)|3566 (IL4R)|3570 (IL6R)|3587 (IL10RA)|3603 (IL16)|3635 (INPP5D)|3659 (IRF1)|3663 (IRF5)|3684 (ITGAM)|3687 (ITGAX)|3689 (ITGB2)|3726 (…
	M	GO|GO.CC	GO:0016020	membrane	1.46846e-17	1.67346e-12	316	60 (ACTB)|113 (ADCY7)|140 (ADORA3)|154 (ADRB2)|162 (AP1B1)|215 (ABCD1)|241 (ALOX5AP)|388 (RHOB)|409 (ARRB2)|598 (BCL2L1)|602 (BCL3)|637 (BID)|695 (BTK)|718 (C3)|719 (C3AR1)|728 (C5AR1)|752 (FMNL1)|920 (CD4)|923 (CD6)|929 (CD14)|933 (CD22)|942 (CD86)|951 (CD37)|963 (CD53)|972 (CD74)|1040 (CDS1)|1230 (CCR1)|1240 (CMKLR1)|1293 (COL6A3)|1435 (CSF1)|1436 (CSF1R)|1439 (CSF2RB)|1441 (CSF3R)|1445 (CSK)|1…
	M	GO|GO.BP	GO:0032943	mononuclear cell proliferation	2.77649e-17	3.16408e-12	36	695 (BTK)|920 (CD4)|923 (CD6)|933 (CD22)|942 (CD86)|972 (CD74)|1051 (CEBPB)|1435 (CSF1)|1794 (DOCK2)|2000 (ELF4)|3109 (HLA-DMB)|3570 (IL6R)|3635 (INPP5D)|3659 (IRF1)|3958 (LGALS3)|4067 (LYN)|4860 (PNP)|5294 (PIK3CG)|5580 (PRKCD)|5585 (PKN1)|5788 (PTPRC)|5880 (RAC2)|6693 (SPN)|7040 (TGFB1)|8764 (TNFRSF14)|10148 (EBI3)|11151 (CORO1A)|23228 (PLCL2)|23308 (ICOSLG)|30835 (CD209)|54440 (SASH3)|64926 (R…
	M	GO|GO.BP	GO:0051240	positive regulation of multicellular organismal process	2.92244e-17	3.33041e-12	101	154 (ADRB2)|388 (RHOB)|409 (ARRB2)|602 (BCL3)|694 (BTG1)|695 (BTK)|718 (C3)|719 (C3AR1)|728 (C5AR1)|834 (CASP1)|920 (CD4)|923 (CD6)|929 (CD14)|942 (CD86)|972 (CD74)|1050 (CEBPA)|1051 (CEBPB)|1230 (CCR1)|1240 (CMKLR1)|1435 (CSF1)|1436 (CSF1R)|1535 (CYBA)|1536 (CYBB)|1960 (EGR3)|2124 (EVI2B)|2185 (PTK2B)|2207 (FCER1G)|2242 (FES)|2268 (FGR)|3059 (HCLS1)|3099 (HK2)|3162 (HMOX1)|3249 (HPN)|3274 (HRH2)…
	M	GO|GO.BP	GO:0070661	leukocyte proliferation	3.15421e-17	3.59453e-12	37	695 (BTK)|920 (CD4)|923 (CD6)|933 (CD22)|942 (CD86)|972 (CD74)|1051 (CEBPB)|1435 (CSF1)|1794 (DOCK2)|2000 (ELF4)|3109 (HLA-DMB)|3570 (IL6R)|3635 (INPP5D)|3659 (IRF1)|3958 (LGALS3)|4067 (LYN)|4860 (PNP)|5294 (PIK3CG)|5580 (PRKCD)|5585 (PKN1)|5788 (PTPRC)|5880 (RAC2)|6693 (SPN)|7040 (TGFB1)|7128 (TNFAIP3)|8764 (TNFRSF14)|10148 (EBI3)|11151 (CORO1A)|23228 (PLCL2)|23308 (ICOSLG)|30835 (CD209)|54440 (…
	M	GO|GO.BP	GO:0002237	response to molecule of bacterial origin	4.89356e-17	5.5767e-12	40	728 (C5AR1)|834 (CASP1)|923 (CD6)|929 (CD14)|942 (CD86)|1051 (CEBPB)|1439 (CSF2RB)|3383 (ICAM1)|3587 (IL10RA)|3663 (IRF5)|3726 (JUNB)|4057 (LTF)|4067 (LYN)|4353 (MPO)|4360 (MRC1)|4791 (NFKB2)|4793 (NFKBIB)|5054 (SERPINE1)|5336 (PLCG2)|5724 (PTAFR)|5734 (PTGER4)|5970 (RELA)|6279 (S100A8)|6347 (CCL2)|7040 (TGFB1)|7096 (TLR1)|7097 (TLR2)|7128 (TNFAIP3)|7133 (TNFRSF1B)|7538 (ZFP36)|7867 (MAPKAPK3)|87…
	M	GO|GO.BP	GO:0030155	regulation of cell adhesion	4.99062e-17	5.68731e-12	57	463 (ZFHX3)|920 (CD4)|923 (CD6)|942 (CD86)|972 (CD74)|1051 (CEBPB)|1435 (CSF1)|1445 (CSK)|1960 (EGR3)|2185 (PTK2B)|2242 (FES)|3077 (HFE)|3109 (HLA-DMB)|3383 (ICAM1)|3566 (IL4R)|3570 (IL6R)|3659 (IRF1)|3956 (LGALS1)|3958 (LGALS3)|4067 (LYN)|4814 (NINJ1)|4860 (PNP)|5054 (SERPINE1)|5140 (PDE3B)|5294 (PIK3CG)|5580 (PRKCD)|5724 (PTAFR)|5788 (PTPRC)|5880 (RAC2)|6347 (CCL2)|6693 (SPN)|7040 (TGFB1)|7045 …
	M	GO|GO.BP	GO:0010647	positive regulation of cell communication	5.2138e-17	5.94165e-12	101	154 (ADRB2)|393 (ARHGAP4)|409 (ARRB2)|467 (ATF3)|598 (BCL2L1)|637 (BID)|718 (C3)|728 (C5AR1)|834 (CASP1)|920 (CD4)|929 (CD14)|942 (CD86)|972 (CD74)|1230 (CCR1)|1435 (CSF1)|1436 (CSF1R)|1445 (CSK)|1535 (CYBA)|1796 (DOK1)|2099 (ESR1)|2185 (PTK2B)|2268 (FGR)|2357 (FPR1)|3059 (HCLS1)|3077 (HFE)|3162 (HMOX1)|3303 (HSPA1A)|3383 (ICAM1)|3570 (IL6R)|3927 (LASP1)|3955 (LFNG)|3956 (LGALS1)|4057 (LTF)|4067 …
	M	GO|GO.CC	GO:0071944	cell periphery	5.60152e-17	6.38349e-12	219	60 (ACTB)|113 (ADCY7)|140 (ADORA3)|154 (ADRB2)|388 (RHOB)|409 (ARRB2)|602 (BCL3)|695 (BTK)|718 (C3)|719 (C3AR1)|728 (C5AR1)|752 (FMNL1)|920 (CD4)|923 (CD6)|929 (CD14)|933 (CD22)|942 (CD86)|951 (CD37)|963 (CD53)|972 (CD74)|1230 (CCR1)|1240 (CMKLR1)|1293 (COL6A3)|1435 (CSF1)|1436 (CSF1R)|1439 (CSF2RB)|1441 (CSF3R)|1445 (CSK)|1522 (CTSZ)|1535 (CYBA)|1536 (CYBB)|2014 (EMP3)|2027 (ENO3)|2099 (ESR1)|21…
	M	GO|GO.CC	GO:0005886	plasma membrane	5.75485e-17	6.55823e-12	216	60 (ACTB)|113 (ADCY7)|140 (ADORA3)|154 (ADRB2)|388 (RHOB)|409 (ARRB2)|602 (BCL3)|695 (BTK)|718 (C3)|719 (C3AR1)|728 (C5AR1)|752 (FMNL1)|920 (CD4)|923 (CD6)|929 (CD14)|933 (CD22)|942 (CD86)|951 (CD37)|963 (CD53)|972 (CD74)|1230 (CCR1)|1240 (CMKLR1)|1293 (COL6A3)|1435 (CSF1)|1436 (CSF1R)|1439 (CSF2RB)|1441 (CSF3R)|1445 (CSK)|1522 (CTSZ)|1535 (CYBA)|1536 (CYBB)|2014 (EMP3)|2027 (ENO3)|2099 (ESR1)|21…
	M	GO|GO.BP	GO:0023056	positive regulation of signaling	6.81236e-17	7.76336e-12	101	154 (ADRB2)|393 (ARHGAP4)|409 (ARRB2)|467 (ATF3)|598 (BCL2L1)|637 (BID)|718 (C3)|728 (C5AR1)|834 (CASP1)|920 (CD4)|929 (CD14)|942 (CD86)|972 (CD74)|1230 (CCR1)|1435 (CSF1)|1436 (CSF1R)|1445 (CSK)|1535 (CYBA)|1796 (DOK1)|2099 (ESR1)|2185 (PTK2B)|2268 (FGR)|2357 (FPR1)|3059 (HCLS1)|3077 (HFE)|3162 (HMOX1)|3303 (HSPA1A)|3383 (ICAM1)|3570 (IL6R)|3927 (LASP1)|3955 (LFNG)|3956 (LGALS1)|4057 (LTF)|4067 …
	M	GO|GO.CC	GO:0012505	endomembrane system	7.16134e-17	8.16106e-12	184	154 (ADRB2)|162 (AP1B1)|215 (ABCD1)|241 (ALOX5AP)|388 (RHOB)|393 (ARHGAP4)|409 (ARRB2)|598 (BCL2L1)|718 (C3)|719 (C3AR1)|728 (C5AR1)|920 (CD4)|929 (CD14)|933 (CD22)|963 (CD53)|972 (CD74)|1040 (CDS1)|1293 (COL6A3)|1435 (CSF1)|1471 (CST3)|1509 (CTSD)|1520 (CTSS)|1522 (CTSZ)|1535 (CYBA)|1536 (CYBB)|1794 (DOCK2)|1844 (DUSP2)|2055 (CLN8)|2099 (ESR1)|2162 (F13A1)|2207 (FCER1G)|2212 (FCGR2A)|2215 (FCGR3…
	M	GO|GO.BP	GO:1903039	positive regulation of leukocyte cell-cell adhesion	8.97462e-17	1.02275e-11	32	920 (CD4)|923 (CD6)|942 (CD86)|972 (CD74)|1445 (CSK)|1960 (EGR3)|3109 (HLA-DMB)|3383 (ICAM1)|3566 (IL4R)|3570 (IL6R)|3956 (LGALS1)|4067 (LYN)|4860 (PNP)|5724 (PTAFR)|5788 (PTPRC)|6347 (CCL2)|7040 (TGFB1)|7409 (VAV1)|8764 (TNFRSF14)|8808 (IL1RL2)|9308 (CD83)|10148 (EBI3)|11151 (CORO1A)|23308 (ICOSLG)|30835 (CD209)|54440 (SASH3)|64926 (RASAL3)|81704 (DOCK8)|84433 (CARD11)|84807 (NFKBID)|84868 (HAVC…
	M	GO|GO.BP	GO:0051249	regulation of lymphocyte activation	9.21088e-17	1.04967e-11	47	695 (BTK)|920 (CD4)|923 (CD6)|933 (CD22)|942 (CD86)|972 (CD74)|1051 (CEBPB)|1445 (CSK)|1960 (EGR3)|3077 (HFE)|3109 (HLA-DMB)|3111 (HLA-DOA)|3566 (IL4R)|3570 (IL6R)|3635 (INPP5D)|3659 (IRF1)|3956 (LGALS1)|3958 (LGALS3)|4067 (LYN)|4860 (PNP)|5585 (PKN1)|5788 (PTPRC)|5880 (RAC2)|6347 (CCL2)|6693 (SPN)|6778 (STAT6)|7040 (TGFB1)|7128 (TNFAIP3)|7409 (VAV1)|8764 (TNFRSF14)|8808 (IL1RL2)|9308 (CD83)|1014…
	M	GO|GO.BP	GO:1903037	regulation of leukocyte cell-cell adhesion	1.00071e-16	1.14041e-11	37	920 (CD4)|923 (CD6)|942 (CD86)|972 (CD74)|1051 (CEBPB)|1445 (CSK)|1960 (EGR3)|3077 (HFE)|3109 (HLA-DMB)|3383 (ICAM1)|3566 (IL4R)|3570 (IL6R)|3659 (IRF1)|3956 (LGALS1)|3958 (LGALS3)|4067 (LYN)|4860 (PNP)|5724 (PTAFR)|5788 (PTPRC)|6347 (CCL2)|6693 (SPN)|7040 (TGFB1)|7409 (VAV1)|8764 (TNFRSF14)|8808 (IL1RL2)|9308 (CD83)|10148 (EBI3)|11151 (CORO1A)|23308 (ICOSLG)|30835 (CD209)|54440 (SASH3)|64926 (RA…
	M	GO|GO.CC	GO:0044444	cytoplasmic part	1.36611e-16	1.55682e-11	318	35 (ACADS)|60 (ACTB)|154 (ADRB2)|162 (AP1B1)|215 (ABCD1)|241 (ALOX5AP)|388 (RHOB)|393 (ARHGAP4)|409 (ARRB2)|598 (BCL2L1)|602 (BCL3)|637 (BID)|695 (BTK)|718 (C3)|719 (C3AR1)|728 (C5AR1)|752 (FMNL1)|834 (CASP1)|920 (CD4)|929 (CD14)|933 (CD22)|963 (CD53)|972 (CD74)|1040 (CDS1)|1293 (COL6A3)|1435 (CSF1)|1445 (CSK)|1471 (CST3)|1509 (CTSD)|1520 (CTSS)|1522 (CTSZ)|1535 (CYBA)|1536 (CYBB)|1777 (DNASE2)|1…
	M	GO|GO.BP	GO:0046651	lymphocyte proliferation	1.49943e-16	1.70875e-11	35	695 (BTK)|920 (CD4)|923 (CD6)|933 (CD22)|942 (CD86)|972 (CD74)|1051 (CEBPB)|1794 (DOCK2)|2000 (ELF4)|3109 (HLA-DMB)|3570 (IL6R)|3635 (INPP5D)|3659 (IRF1)|3958 (LGALS3)|4067 (LYN)|4860 (PNP)|5294 (PIK3CG)|5580 (PRKCD)|5585 (PKN1)|5788 (PTPRC)|5880 (RAC2)|6693 (SPN)|7040 (TGFB1)|8764 (TNFRSF14)|10148 (EBI3)|11151 (CORO1A)|23228 (PLCL2)|23308 (ICOSLG)|30835 (CD209)|54440 (SASH3)|64926 (RASAL3)|81704…
	M	GO|GO.BP	GO:0032103	positive regulation of response to external stimulus	1.56604e-16	1.78466e-11	37	695 (BTK)|718 (C3)|719 (C3AR1)|728 (C5AR1)|923 (CD6)|972 (CD74)|1050 (CEBPA)|1230 (CCR1)|1240 (CMKLR1)|1435 (CSF1)|1535 (CYBA)|2185 (PTK2B)|2207 (FCER1G)|3570 (IL6R)|3603 (IL16)|3684 (ITGAM)|3689 (ITGB2)|4615 (MYD88)|5054 (SERPINE1)|5294 (PIK3CG)|5641 (LGMN)|5734 (PTGER4)|5880 (RAC2)|6279 (S100A8)|6280 (S100A9)|7040 (TGFB1)|7052 (TGM2)|7097 (TLR2)|7132 (TNFRSF1A)|8673 (VAMP8)|8792 (TNFRSF11A)|103…
	M	GO|GO.CC	GO:0005773	vacuole	1.96042e-16	2.2341e-11	60	154 (ADRB2)|162 (AP1B1)|215 (ABCD1)|695 (BTK)|718 (C3)|719 (C3AR1)|972 (CD74)|1509 (CTSD)|1520 (CTSS)|1522 (CTSZ)|1777 (DNASE2)|2357 (FPR1)|2588 (GALNS)|2683 (B4GALT1)|2799 (GNS)|2896 (GRN)|3073 (HEXA)|3109 (HLA-DMB)|3111 (HLA-DOA)|4067 (LYN)|4353 (MPO)|4669 (NAGLU)|4688 (NCF2)|4689 (NCF4)|4758 (NEU1)|5293 (PIK3CD)|5294 (PIK3CG)|5580 (PRKCD)|5641 (LGMN)|6039 (RNASE6)|6948 (TCN2)|7107 (GPR137B)|71…
	M	GO|GO.BP	GO:0050863	regulation of T cell activation	3.74901e-16	4.27238e-11	37	920 (CD4)|923 (CD6)|942 (CD86)|972 (CD74)|1051 (CEBPB)|1445 (CSK)|1960 (EGR3)|3077 (HFE)|3109 (HLA-DMB)|3111 (HLA-DOA)|3566 (IL4R)|3570 (IL6R)|3659 (IRF1)|3956 (LGALS1)|3958 (LGALS3)|4067 (LYN)|4860 (PNP)|5788 (PTPRC)|5880 (RAC2)|6347 (CCL2)|6693 (SPN)|7040 (TGFB1)|7409 (VAV1)|8764 (TNFRSF14)|8808 (IL1RL2)|9308 (CD83)|10148 (EBI3)|11151 (CORO1A)|23308 (ICOSLG)|30835 (CD209)|54440 (SASH3)|64926 (R…
	M	GO|GO.BP	GO:0050900	leukocyte migration	7.34449e-16	8.36978e-11	46	719 (C3AR1)|728 (C5AR1)|972 (CD74)|1230 (CCR1)|1240 (CMKLR1)|1435 (CSF1)|1441 (CSF3R)|2185 (PTK2B)|2207 (FCER1G)|2650 (GCNT1)|2683 (B4GALT1)|3162 (HMOX1)|3383 (ICAM1)|3570 (IL6R)|3603 (IL16)|3635 (INPP5D)|3683 (ITGAL)|3684 (ITGAM)|3687 (ITGAX)|3689 (ITGB2)|3958 (LGALS3)|4067 (LYN)|5054 (SERPINE1)|5293 (PIK3CD)|5294 (PIK3CG)|5641 (LGMN)|5724 (PTAFR)|5734 (PTGER4)|5880 (RAC2)|6279 (S100A8)|6280 (S1…
	M	GO|GO.BP	GO:0070663	regulation of leukocyte proliferation	8.96059e-16	1.02115e-10	31	695 (BTK)|920 (CD4)|923 (CD6)|933 (CD22)|942 (CD86)|972 (CD74)|1051 (CEBPB)|1435 (CSF1)|3109 (HLA-DMB)|3570 (IL6R)|3635 (INPP5D)|3659 (IRF1)|3958 (LGALS3)|4067 (LYN)|4860 (PNP)|5585 (PKN1)|5788 (PTPRC)|5880 (RAC2)|6693 (SPN)|7040 (TGFB1)|7128 (TNFAIP3)|8764 (TNFRSF14)|10148 (EBI3)|11151 (CORO1A)|23308 (ICOSLG)|30835 (CD209)|54440 (SASH3)|64926 (RASAL3)|84433 (CARD11)|84868 (HAVCR2)|148022 (TICAM1)
	M	GO|GO.BP	GO:0050870	positive regulation of T cell activation	1.0171e-15	1.15908e-10	30	920 (CD4)|923 (CD6)|942 (CD86)|972 (CD74)|1445 (CSK)|1960 (EGR3)|3109 (HLA-DMB)|3566 (IL4R)|3570 (IL6R)|3956 (LGALS1)|4067 (LYN)|4860 (PNP)|5788 (PTPRC)|6347 (CCL2)|7040 (TGFB1)|7409 (VAV1)|8764 (TNFRSF14)|8808 (IL1RL2)|9308 (CD83)|10148 (EBI3)|11151 (CORO1A)|23308 (ICOSLG)|30835 (CD209)|54440 (SASH3)|64926 (RASAL3)|81704 (DOCK8)|84433 (CARD11)|84807 (NFKBID)|84868 (HAVCR2)|114548 (NLRP3)
	M	GO|GO.BP	GO:0050727	regulation of inflammatory response	1.13471e-15	1.29312e-10	43	113 (ADCY7)|215 (ABCD1)|695 (BTK)|712 (C1QA)|713 (C1QB)|714 (C1QC)|718 (C3)|719 (C3AR1)|728 (C5AR1)|923 (CD6)|1050 (CEBPA)|2099 (ESR1)|2207 (FCER1G)|3684 (ITGAM)|3689 (ITGB2)|4067 (LYN)|4615 (MYD88)|5054 (SERPINE1)|5176 (SERPINF1)|5199 (CFP)|5294 (PIK3CG)|5580 (PRKCD)|5734 (PTGER4)|5788 (PTPRC)|5970 (RELA)|6279 (S100A8)|6280 (S100A9)|7052 (TGM2)|7097 (TLR2)|7128 (TNFAIP3)|7132 (TNFRSF1A)|7133 (TN…
	M	GO|GO.BP	GO:0032944	regulation of mononuclear cell proliferation	1.75741e-15	2.00274e-10	30	695 (BTK)|920 (CD4)|923 (CD6)|933 (CD22)|942 (CD86)|972 (CD74)|1051 (CEBPB)|1435 (CSF1)|3109 (HLA-DMB)|3570 (IL6R)|3635 (INPP5D)|3659 (IRF1)|3958 (LGALS3)|4067 (LYN)|4860 (PNP)|5585 (PKN1)|5788 (PTPRC)|5880 (RAC2)|6693 (SPN)|7040 (TGFB1)|8764 (TNFRSF14)|10148 (EBI3)|11151 (CORO1A)|23308 (ICOSLG)|30835 (CD209)|54440 (SASH3)|64926 (RASAL3)|84433 (CARD11)|84868 (HAVCR2)|148022 (TICAM1)
	M	GO|GO.BP	GO:0009966	regulation of signal transduction	1.78448e-15	2.0336e-10	144	154 (ADRB2)|388 (RHOB)|393 (ARHGAP4)|409 (ARRB2)|467 (ATF3)|598 (BCL2L1)|602 (BCL3)|637 (BID)|718 (C3)|728 (C5AR1)|834 (CASP1)|920 (CD4)|929 (CD14)|933 (CD22)|942 (CD86)|972 (CD74)|1230 (CCR1)|1240 (CMKLR1)|1435 (CSF1)|1436 (CSF1R)|1445 (CSK)|1535 (CYBA)|1796 (DOK1)|1827 (RCAN1)|1844 (DUSP2)|2099 (ESR1)|2185 (PTK2B)|2268 (FGR)|2357 (FPR1)|2896 (GRN)|3059 (HCLS1)|3077 (HFE)|3162 (HMOX1)|3303 (HSPA…
	M	GO|GO.CC	GO:0044425	membrane part	2.2653e-15	2.58154e-10	245	113 (ADCY7)|140 (ADORA3)|154 (ADRB2)|162 (AP1B1)|215 (ABCD1)|241 (ALOX5AP)|388 (RHOB)|409 (ARRB2)|598 (BCL2L1)|637 (BID)|695 (BTK)|719 (C3AR1)|728 (C5AR1)|920 (CD4)|923 (CD6)|929 (CD14)|933 (CD22)|942 (CD86)|951 (CD37)|963 (CD53)|972 (CD74)|1040 (CDS1)|1230 (CCR1)|1240 (CMKLR1)|1435 (CSF1)|1436 (CSF1R)|1439 (CSF2RB)|1441 (CSF3R)|1445 (CSK)|1509 (CTSD)|1535 (CYBA)|1536 (CYBB)|1820 (ARID3A)|2014 (E…
	M	GO|GO.BP	GO:0032496	response to lipopolysaccharide	2.66201e-15	3.03363e-10	37	728 (C5AR1)|834 (CASP1)|923 (CD6)|929 (CD14)|942 (CD86)|1051 (CEBPB)|1439 (CSF2RB)|3383 (ICAM1)|3587 (IL10RA)|3726 (JUNB)|4057 (LTF)|4067 (LYN)|4353 (MPO)|4360 (MRC1)|4791 (NFKB2)|4793 (NFKBIB)|5054 (SERPINE1)|5336 (PLCG2)|5724 (PTAFR)|5734 (PTGER4)|5970 (RELA)|6279 (S100A8)|6347 (CCL2)|7040 (TGFB1)|7097 (TLR2)|7128 (TNFAIP3)|7133 (TNFRSF1B)|7538 (ZFP36)|7867 (MAPKAPK3)|8792 (TNFRSF11A)|9261 (MAP…
	M	GO|GO.BP	GO:1902533	positive regulation of intracellular signal transduction	4.73597e-15	5.39712e-10	71	154 (ADRB2)|409 (ARRB2)|598 (BCL2L1)|637 (BID)|728 (C5AR1)|834 (CASP1)|920 (CD4)|929 (CD14)|942 (CD86)|972 (CD74)|1230 (CCR1)|1435 (CSF1)|1436 (CSF1R)|1445 (CSK)|2099 (ESR1)|2185 (PTK2B)|2268 (FGR)|2357 (FPR1)|3059 (HCLS1)|3162 (HMOX1)|3303 (HSPA1A)|3383 (ICAM1)|3570 (IL6R)|3956 (LGALS1)|4057 (LTF)|4067 (LYN)|4615 (MYD88)|5293 (PIK3CD)|5294 (PIK3CG)|5326 (PLAGL2)|5585 (PKN1)|5606 (MAP2K3)|5770 (P…
	M	GO|GO.CC	GO:0030667	secretory granule membrane	4.80289e-15	5.47338e-10	35	719 (C3AR1)|728 (C5AR1)|929 (CD14)|963 (CD53)|1535 (CYBA)|1536 (CYBB)|2207 (FCER1G)|2212 (FCGR2A)|2215 (FCGR3B)|2357 (FPR1)|2683 (B4GALT1)|3683 (ITGAL)|3684 (ITGAM)|3687 (ITGAX)|3689 (ITGB2)|3958 (LGALS3)|5724 (PTAFR)|5788 (PTPRC)|6793 (STK10)|7097 (TLR2)|7133 (TNFRSF1B)|7226 (TRPM2)|7305 (TYROBP)|8673 (VAMP8)|9145 (SYNGR1)|10312 (TCIRG1)|10555 (AGPAT2)|11010 (GLIPR1)|23218 (NBEAL2)|54918 (CMTM6)…
	M	GO|GO.BP	GO:0042035	regulation of cytokine biosynthetic process	4.89643e-15	5.57997e-10	21	602 (BCL3)|920 (CD4)|942 (CD86)|1051 (CEBPB)|1536 (CYBB)|3162 (HMOX1)|3635 (INPP5D)|3659 (IRF1)|5606 (MAP2K3)|5724 (PTAFR)|5788 (PTPRC)|5970 (RELA)|6693 (SPN)|7096 (TLR1)|7538 (ZFP36)|9261 (MAPKAPK2)|10148 (EBI3)|10333 (TLR6)|51284 (TLR7)|84433 (CARD11)|148022 (TICAM1)
	M	GO|GO.BP	GO:0098609	cell-cell adhesion	5.73637e-15	6.53716e-10	60	60 (ACTB)|920 (CD4)|923 (CD6)|942 (CD86)|972 (CD74)|1051 (CEBPB)|1445 (CSK)|1960 (EGR3)|2650 (GCNT1)|3077 (HFE)|3109 (HLA-DMB)|3383 (ICAM1)|3566 (IL4R)|3570 (IL6R)|3659 (IRF1)|3683 (ITGAL)|3684 (ITGAM)|3687 (ITGAX)|3689 (ITGB2)|3693 (ITGB5)|3956 (LGALS1)|3958 (LGALS3)|4067 (LYN)|4860 (PNP)|5294 (PIK3CG)|5341 (PLEK)|5580 (PRKCD)|5724 (PTAFR)|5788 (PTPRC)|5880 (RAC2)|6279 (S100A8)|6280 (S100A9)|634…
	M	GO|GO.BP	GO:0022407	regulation of cell-cell adhesion	6.2817e-15	7.15863e-10	40	920 (CD4)|923 (CD6)|942 (CD86)|972 (CD74)|1051 (CEBPB)|1445 (CSK)|1960 (EGR3)|3077 (HFE)|3109 (HLA-DMB)|3383 (ICAM1)|3566 (IL4R)|3570 (IL6R)|3659 (IRF1)|3956 (LGALS1)|3958 (LGALS3)|4067 (LYN)|4860 (PNP)|5580 (PRKCD)|5724 (PTAFR)|5788 (PTPRC)|6347 (CCL2)|6693 (SPN)|7040 (TGFB1)|7409 (VAV1)|8764 (TNFRSF14)|8808 (IL1RL2)|9308 (CD83)|10148 (EBI3)|11151 (CORO1A)|23308 (ICOSLG)|30835 (CD209)|54440 (SAS…
	M	GO|GO.BP	GO:0022409	positive regulation of cell-cell adhesion	9.56809e-15	1.09038e-09	32	920 (CD4)|923 (CD6)|942 (CD86)|972 (CD74)|1445 (CSK)|1960 (EGR3)|3109 (HLA-DMB)|3383 (ICAM1)|3566 (IL4R)|3570 (IL6R)|3956 (LGALS1)|4067 (LYN)|4860 (PNP)|5724 (PTAFR)|5788 (PTPRC)|6347 (CCL2)|7040 (TGFB1)|7409 (VAV1)|8764 (TNFRSF14)|8808 (IL1RL2)|9308 (CD83)|10148 (EBI3)|11151 (CORO1A)|23308 (ICOSLG)|30835 (CD209)|54440 (SASH3)|64926 (RASAL3)|81704 (DOCK8)|84433 (CARD11)|84807 (NFKBID)|84868 (HAVC…
	M	GO|GO.BP	GO:0051704	multi-organism process	1.00589e-14	1.14632e-09	120	113 (ADCY7)|162 (AP1B1)|598 (BCL2L1)|602 (BCL3)|694 (BTG1)|695 (BTK)|718 (C3)|728 (C5AR1)|834 (CASP1)|920 (CD4)|923 (CD6)|929 (CD14)|942 (CD86)|972 (CD74)|1050 (CEBPA)|1051 (CEBPB)|1439 (CSF2RB)|1535 (CYBA)|1794 (DOCK2)|2055 (CLN8)|2099 (ESR1)|2185 (PTK2B)|2207 (FCER1G)|2268 (FGR)|2289 (FKBP5)|2350 (FOLR2)|2683 (B4GALT1)|3077 (HFE)|3159 (HMGA1)|3249 (HPN)|3303 (HSPA1A)|3383 (ICAM1)|3431 (SP110)|3…
	M	GO|GO.BP	GO:0042108	positive regulation of cytokine biosynthetic process	1.08449e-14	1.23589e-09	17	602 (BCL3)|920 (CD4)|942 (CD86)|1536 (CYBB)|3162 (HMOX1)|3659 (IRF1)|5724 (PTAFR)|5788 (PTPRC)|5970 (RELA)|6693 (SPN)|7096 (TLR1)|9261 (MAPKAPK2)|10148 (EBI3)|10333 (TLR6)|51284 (TLR7)|84433 (CARD11)|148022 (TICAM1)
	M	GO|GO.BP	GO:0050670	regulation of lymphocyte proliferation	1.13991e-14	1.29904e-09	29	695 (BTK)|920 (CD4)|923 (CD6)|933 (CD22)|942 (CD86)|972 (CD74)|1051 (CEBPB)|3109 (HLA-DMB)|3570 (IL6R)|3635 (INPP5D)|3659 (IRF1)|3958 (LGALS3)|4067 (LYN)|4860 (PNP)|5585 (PKN1)|5788 (PTPRC)|5880 (RAC2)|6693 (SPN)|7040 (TGFB1)|8764 (TNFRSF14)|10148 (EBI3)|11151 (CORO1A)|23308 (ICOSLG)|30835 (CD209)|54440 (SASH3)|64926 (RASAL3)|84433 (CARD11)|84868 (HAVCR2)|148022 (TICAM1)
	M	GO|GO.CC	GO:0098588	bounding membrane of organelle	1.638e-14	1.86666e-09	105	154 (ADRB2)|162 (AP1B1)|215 (ABCD1)|388 (RHOB)|598 (BCL2L1)|637 (BID)|719 (C3AR1)|728 (C5AR1)|920 (CD4)|929 (CD14)|963 (CD53)|972 (CD74)|1522 (CTSZ)|1535 (CYBA)|1536 (CYBB)|2055 (CLN8)|2207 (FCER1G)|2212 (FCGR2A)|2215 (FCGR3B)|2357 (FPR1)|2650 (GCNT1)|2683 (B4GALT1)|3099 (HK2)|3109 (HLA-DMB)|3111 (HLA-DOA)|3683 (ITGAL)|3684 (ITGAM)|3687 (ITGAX)|3689 (ITGB2)|3955 (LFNG)|3958 (LGALS3)|4245 (MGAT1)|…
	M	GO|GO.BP	GO:0002697	regulation of immune effector process	1.7439e-14	1.98735e-09	42	409 (ARRB2)|695 (BTK)|712 (C1QA)|713 (C1QB)|714 (C1QC)|718 (C3)|719 (C3AR1)|728 (C5AR1)|933 (CD22)|942 (CD86)|972 (CD74)|2207 (FCER1G)|2242 (FES)|2268 (FGR)|3077 (HFE)|3109 (HLA-DMB)|3162 (HMOX1)|3566 (IL4R)|3684 (ITGAM)|3689 (ITGB2)|3958 (LGALS3)|4067 (LYN)|5199 (CFP)|5585 (PKN1)|5724 (PTAFR)|5788 (PTPRC)|5880 (RAC2)|6778 (STAT6)|7040 (TGFB1)|7128 (TNFAIP3)|7409 (VAV1)|8673 (VAMP8)|8764 (TNFRSF1…
	M	GO|GO.BP	GO:0042221	response to chemical	1.77288e-14	2.02037e-09	184	60 (ACTB)|113 (ADCY7)|154 (ADRB2)|215 (ABCD1)|241 (ALOX5AP)|388 (RHOB)|409 (ARRB2)|463 (ZFHX3)|467 (ATF3)|598 (BCL2L1)|694 (BTG1)|695 (BTK)|712 (C1QA)|719 (C3AR1)|728 (C5AR1)|834 (CASP1)|920 (CD4)|923 (CD6)|929 (CD14)|942 (CD86)|972 (CD74)|1050 (CEBPA)|1051 (CEBPB)|1230 (CCR1)|1240 (CMKLR1)|1435 (CSF1)|1436 (CSF1R)|1439 (CSF2RB)|1441 (CSF3R)|1445 (CSK)|1520 (CTSS)|1535 (CYBA)|1536 (CYBB)|1794 (DO…
	M	GO|GO.BP	GO:0030098	lymphocyte differentiation	1.79492e-14	2.04549e-09	37	602 (BCL3)|695 (BTK)|920 (CD4)|942 (CD86)|972 (CD74)|1794 (DOCK2)|1960 (EGR3)|2185 (PTK2B)|2207 (FCER1G)|3111 (HLA-DOA)|3566 (IL4R)|3635 (INPP5D)|3659 (IRF1)|3955 (LFNG)|3956 (LGALS1)|4066 (LYL1)|4860 (PNP)|5293 (PIK3CD)|5336 (PLCG2)|5452 (POU2F2)|5734 (PTGER4)|5788 (PTPRC)|5971 (RELB)|6693 (SPN)|6778 (STAT6)|7040 (TGFB1)|7409 (VAV1)|8808 (IL1RL2)|9308 (CD83)|10320 (IKZF1)|23228 (PLCL2)|54440 (SA…
	M	GO|GO.BP	GO:0002699	positive regulation of immune effector process	1.90669e-14	2.17286e-09	29	695 (BTK)|718 (C3)|942 (CD86)|972 (CD74)|2207 (FCER1G)|2242 (FES)|2268 (FGR)|3077 (HFE)|3109 (HLA-DMB)|3162 (HMOX1)|3566 (IL4R)|3684 (ITGAM)|3689 (ITGB2)|4067 (LYN)|5724 (PTAFR)|5788 (PTPRC)|5880 (RAC2)|6778 (STAT6)|7040 (TGFB1)|7409 (VAV1)|8673 (VAMP8)|8764 (TNFRSF14)|8832 (CD84)|54440 (SASH3)|79132 (DHX58)|84807 (NFKBID)|114548 (NLRP3)|148022 (TICAM1)|201294 (UNC13D)
	M	GO|GO.BP	GO:1902531	regulation of intracellular signal transduction	2.28594e-14	2.60506e-09	99	154 (ADRB2)|388 (RHOB)|393 (ARHGAP4)|409 (ARRB2)|467 (ATF3)|598 (BCL2L1)|602 (BCL3)|637 (BID)|728 (C5AR1)|834 (CASP1)|920 (CD4)|929 (CD14)|933 (CD22)|942 (CD86)|972 (CD74)|1230 (CCR1)|1240 (CMKLR1)|1435 (CSF1)|1436 (CSF1R)|1445 (CSK)|1827 (RCAN1)|1844 (DUSP2)|2099 (ESR1)|2185 (PTK2B)|2268 (FGR)|2357 (FPR1)|3059 (HCLS1)|3162 (HMOX1)|3303 (HSPA1A)|3383 (ICAM1)|3570 (IL6R)|3956 (LGALS1)|4057 (LTF)|4…
	M	GO|GO.BP	GO:0002886	regulation of myeloid leukocyte mediated immunity	2.70603e-14	3.08379e-09	16	695 (BTK)|718 (C3)|2207 (FCER1G)|2242 (FES)|2268 (FGR)|3162 (HMOX1)|3566 (IL4R)|3684 (ITGAM)|3689 (ITGB2)|4067 (LYN)|5724 (PTAFR)|5880 (RAC2)|8673 (VAMP8)|8832 (CD84)|148022 (TICAM1)|201294 (UNC13D)
	M	GO|GO.BP	GO:0042089	cytokine biosynthetic process	5.15842e-14	5.87854e-09	21	602 (BCL3)|920 (CD4)|942 (CD86)|1051 (CEBPB)|1536 (CYBB)|3162 (HMOX1)|3635 (INPP5D)|3659 (IRF1)|5606 (MAP2K3)|5724 (PTAFR)|5788 (PTPRC)|5970 (RELA)|6693 (SPN)|7096 (TLR1)|7538 (ZFP36)|9261 (MAPKAPK2)|10148 (EBI3)|10333 (TLR6)|51284 (TLR7)|84433 (CARD11)|148022 (TICAM1)
	M	GO|GO.BP	GO:0006897	endocytosis	5.24009e-14	5.97161e-09	57	60 (ACTB)|154 (ADRB2)|409 (ARRB2)|598 (BCL2L1)|718 (C3)|923 (CD6)|929 (CD14)|933 (CD22)|1445 (CSK)|1535 (CYBA)|1794 (DOCK2)|2207 (FCER1G)|2212 (FCGR2A)|2268 (FGR)|2350 (FOLR2)|3077 (HFE)|3683 (ITGAL)|3684 (ITGAM)|3689 (ITGB2)|3958 (LGALS3)|3959 (LGALS3BP)|4067 (LYN)|4360 (MRC1)|4481 (MSR1)|4688 (NCF2)|4689 (NCF4)|5054 (SERPINE1)|5294 (PIK3CG)|5336 (PLCG2)|5580 (PRKCD)|5770 (PTPN1)|5788 (PTPRC)|63…
	M	GO|GO.CC	GO:1903561	extracellular vesicle	5.57555e-14	6.3539e-09	108	60 (ACTB)|388 (RHOB)|718 (C3)|752 (FMNL1)|929 (CD14)|933 (CD22)|942 (CD86)|951 (CD37)|963 (CD53)|972 (CD74)|1293 (COL6A3)|1445 (CSK)|1471 (CST3)|1509 (CTSD)|1522 (CTSZ)|1777 (DNASE2)|1794 (DOCK2)|2027 (ENO3)|2215 (FCGR3B)|2268 (FGR)|2289 (FKBP5)|2588 (GALNS)|2683 (B4GALT1)|2799 (GNS)|2896 (GRN)|3017 (HIST1H2BD)|3073 (HEXA)|3249 (HPN)|3303 (HSPA1A)|3383 (ICAM1)|3683 (ITGAL)|3684 (ITGAM)|3689 (ITGB…
	M	GO|GO.CC	GO:0043230	extracellular organelle	5.92419e-14	6.75121e-09	108	60 (ACTB)|388 (RHOB)|718 (C3)|752 (FMNL1)|929 (CD14)|933 (CD22)|942 (CD86)|951 (CD37)|963 (CD53)|972 (CD74)|1293 (COL6A3)|1445 (CSK)|1471 (CST3)|1509 (CTSD)|1522 (CTSZ)|1777 (DNASE2)|1794 (DOCK2)|2027 (ENO3)|2215 (FCGR3B)|2268 (FGR)|2289 (FKBP5)|2588 (GALNS)|2683 (B4GALT1)|2799 (GNS)|2896 (GRN)|3017 (HIST1H2BD)|3073 (HEXA)|3249 (HPN)|3303 (HSPA1A)|3383 (ICAM1)|3683 (ITGAL)|3684 (ITGAM)|3689 (ITGB…
	M	GO|GO.BP	GO:0048513	animal organ development	6.16343e-14	7.02384e-09	148	60 (ACTB)|154 (ADRB2)|162 (AP1B1)|409 (ARRB2)|463 (ZFHX3)|467 (ATF3)|598 (BCL2L1)|602 (BCL3)|695 (BTK)|713 (C1QB)|714 (C1QC)|728 (C5AR1)|920 (CD4)|942 (CD86)|972 (CD74)|1050 (CEBPA)|1051 (CEBPB)|1230 (CCR1)|1293 (COL6A3)|1435 (CSF1)|1436 (CSF1R)|1441 (CSF3R)|1445 (CSK)|1522 (CTSZ)|1777 (DNASE2)|1794 (DOCK2)|1960 (EGR3)|2055 (CLN8)|2099 (ESR1)|2124 (EVI2B)|2185 (PTK2B)|2207 (FCER1G)|2242 (FES)|265…
	M	GO|GO.BP	GO:0042107	cytokine metabolic process	6.29314e-14	7.17166e-09	21	602 (BCL3)|920 (CD4)|942 (CD86)|1051 (CEBPB)|1536 (CYBB)|3162 (HMOX1)|3635 (INPP5D)|3659 (IRF1)|5606 (MAP2K3)|5724 (PTAFR)|5788 (PTPRC)|5970 (RELA)|6693 (SPN)|7096 (TLR1)|7538 (ZFP36)|9261 (MAPKAPK2)|10148 (EBI3)|10333 (TLR6)|51284 (TLR7)|84433 (CARD11)|148022 (TICAM1)
	M	GO|GO.BP	GO:0045785	positive regulation of cell adhesion	6.69893e-14	7.6341e-09	39	463 (ZFHX3)|920 (CD4)|923 (CD6)|942 (CD86)|972 (CD74)|1435 (CSF1)|1445 (CSK)|1960 (EGR3)|2185 (PTK2B)|3109 (HLA-DMB)|3383 (ICAM1)|3566 (IL4R)|3570 (IL6R)|3956 (LGALS1)|4067 (LYN)|4814 (NINJ1)|4860 (PNP)|5724 (PTAFR)|5788 (PTPRC)|6347 (CCL2)|7040 (TGFB1)|7052 (TGM2)|7409 (VAV1)|8764 (TNFRSF14)|8808 (IL1RL2)|9308 (CD83)|10148 (EBI3)|11151 (CORO1A)|23308 (ICOSLG)|30835 (CD209)|54440 (SASH3)|54518 (A…
	M	GO|GO.BP	GO:0002683	negative regulation of immune system process	6.99887e-14	7.97592e-09	41	409 (ARRB2)|695 (BTK)|714 (C1QC)|929 (CD14)|933 (CD22)|942 (CD86)|972 (CD74)|1051 (CEBPB)|2185 (PTK2B)|2207 (FCER1G)|3077 (HFE)|3111 (HLA-DOA)|3162 (HMOX1)|3566 (IL4R)|3635 (INPP5D)|3659 (IRF1)|3958 (LGALS3)|4057 (LTF)|4067 (LYN)|5585 (PKN1)|5734 (PTGER4)|5788 (PTPRC)|6347 (CCL2)|6693 (SPN)|6778 (STAT6)|7040 (TGFB1)|7128 (TNFAIP3)|7538 (ZFP36)|8764 (TNFRSF14)|8832 (CD84)|9404 (LPXN)|10333 (TLR6)|…
	M	GO|GO.BP	GO:0002285	lymphocyte activation involved in immune response	7.39785e-14	8.43059e-09	26	602 (BCL3)|942 (CD86)|2185 (PTK2B)|2207 (FCER1G)|3109 (HLA-DMB)|3383 (ICAM1)|3566 (IL4R)|3683 (ITGAL)|3936 (LCP1)|3955 (LFNG)|3956 (LGALS1)|3958 (LGALS3)|5336 (PLCG2)|5734 (PTGER4)|5788 (PTPRC)|5971 (RELB)|6693 (SPN)|6778 (STAT6)|7040 (TGFB1)|11151 (CORO1A)|23228 (PLCL2)|54518 (APBB1IP)|84807 (NFKBID)|84868 (HAVCR2)|114548 (NLRP3)|201294 (UNC13D)
	M	GO|GO.CC	GO:0042581	specific granule	7.89479e-14	8.99691e-09	25	719 (C3AR1)|963 (CD53)|1509 (CTSD)|1522 (CTSZ)|1535 (CYBA)|1536 (CYBB)|1794 (DOCK2)|3683 (ITGAL)|3684 (ITGAM)|3689 (ITGB2)|4057 (LTF)|4758 (NEU1)|5199 (CFP)|5768 (QSOX1)|6793 (STK10)|7133 (TNFRSF1B)|7226 (TRPM2)|8673 (VAMP8)|10555 (AGPAT2)|10855 (HPSE)|54918 (CMTM6)|57153 (SLC44A2)|79792 (GSDMD)|81619 (TSPAN14)|84329 (HVCN1)
	M	GO|GO.BP	GO:0098542	defense response to other organism	1.16031e-13	1.32229e-08	46	602 (BCL3)|728 (C5AR1)|920 (CD4)|1051 (CEBPB)|1535 (CYBA)|2207 (FCER1G)|2268 (FGR)|3566 (IL4R)|3570 (IL6R)|3659 (IRF1)|3663 (IRF5)|4057 (LTF)|4353 (MPO)|4615 (MYD88)|4939 (OAS2)|5054 (SERPINE1)|5199 (CFP)|5580 (PRKCD)|5788 (PTPRC)|5970 (RELA)|6039 (RNASE6)|6279 (S100A8)|6280 (S100A9)|6693 (SPN)|7040 (TGFB1)|7097 (TLR2)|7100 (TLR5)|7128 (TNFAIP3)|7132 (TNFRSF1A)|8764 (TNFRSF14)|9020 (MAP3K14)|1033…
	M	GO|GO.BP	GO:0042098	T cell proliferation	1.28171e-13	1.46064e-08	26	920 (CD4)|923 (CD6)|942 (CD86)|1051 (CEBPB)|1794 (DOCK2)|2000 (ELF4)|3109 (HLA-DMB)|3570 (IL6R)|3659 (IRF1)|3958 (LGALS3)|4860 (PNP)|5294 (PIK3CG)|5788 (PTPRC)|5880 (RAC2)|6693 (SPN)|7040 (TGFB1)|8764 (TNFRSF14)|10148 (EBI3)|11151 (CORO1A)|23308 (ICOSLG)|30835 (CD209)|54440 (SASH3)|64926 (RASAL3)|81704 (DOCK8)|84433 (CARD11)|84868 (HAVCR2)
	M	GO|GO.CC	GO:0070062	extracellular exosome	1.77608e-13	2.02402e-08	106	60 (ACTB)|388 (RHOB)|718 (C3)|752 (FMNL1)|929 (CD14)|933 (CD22)|942 (CD86)|951 (CD37)|963 (CD53)|972 (CD74)|1293 (COL6A3)|1445 (CSK)|1471 (CST3)|1509 (CTSD)|1522 (CTSZ)|1777 (DNASE2)|1794 (DOCK2)|2027 (ENO3)|2215 (FCGR3B)|2268 (FGR)|2289 (FKBP5)|2588 (GALNS)|2683 (B4GALT1)|2799 (GNS)|2896 (GRN)|3017 (HIST1H2BD)|3073 (HEXA)|3249 (HPN)|3303 (HSPA1A)|3383 (ICAM1)|3683 (ITGAL)|3684 (ITGAM)|3689 (ITGB…
	M	GO|GO.BP	GO:0051251	positive regulation of lymphocyte activation	1.86305e-13	2.12313e-08	35	695 (BTK)|920 (CD4)|923 (CD6)|942 (CD86)|972 (CD74)|1445 (CSK)|1960 (EGR3)|3109 (HLA-DMB)|3566 (IL4R)|3570 (IL6R)|3635 (INPP5D)|3956 (LGALS1)|4067 (LYN)|4860 (PNP)|5788 (PTPRC)|6347 (CCL2)|6778 (STAT6)|7040 (TGFB1)|7409 (VAV1)|8764 (TNFRSF14)|8808 (IL1RL2)|9308 (CD83)|10148 (EBI3)|11151 (CORO1A)|23308 (ICOSLG)|30835 (CD209)|54440 (SASH3)|64926 (RASAL3)|79155 (TNIP2)|81704 (DOCK8)|84433 (CARD11)|8…
	M	GO|GO.BP	GO:0071216	cellular response to biotic stimulus	2.09615e-13	2.38878e-08	29	695 (BTK)|834 (CASP1)|923 (CD6)|929 (CD14)|942 (CD86)|1051 (CEBPB)|3383 (ICAM1)|4057 (LTF)|4067 (LYN)|4360 (MRC1)|4793 (NFKBIB)|5054 (SERPINE1)|5724 (PTAFR)|5970 (RELA)|6347 (CCL2)|7040 (TGFB1)|7096 (TLR1)|7097 (TLR2)|7128 (TNFAIP3)|7133 (TNFRSF1B)|7538 (ZFP36)|10333 (TLR6)|10628 (TXNIP)|22904 (SBNO2)|54209 (TREM2)|79155 (TNIP2)|84868 (HAVCR2)|114548 (NLRP3)|148022 (TICAM1)
	M	GO|GO.BP	GO:1901700	response to oxygen-containing compound	2.44057e-13	2.78127e-08	86	60 (ACTB)|113 (ADCY7)|154 (ADRB2)|388 (RHOB)|598 (BCL2L1)|694 (BTG1)|695 (BTK)|728 (C5AR1)|834 (CASP1)|920 (CD4)|923 (CD6)|929 (CD14)|942 (CD86)|1051 (CEBPB)|1439 (CSF2RB)|1445 (CSK)|1535 (CYBA)|1536 (CYBB)|2099 (ESR1)|2185 (PTK2B)|2350 (FOLR2)|2650 (GCNT1)|2769 (GNA15)|3162 (HMOX1)|3383 (ICAM1)|3587 (IL10RA)|3663 (IRF5)|3726 (JUNB)|3956 (LGALS1)|4057 (LTF)|4067 (LYN)|4353 (MPO)|4360 (MRC1)|4548 …
	M	GO|GO.BP	GO:0032502	developmental process	2.49108e-13	2.83884e-08	223	60 (ACTB)|154 (ADRB2)|162 (AP1B1)|215 (ABCD1)|388 (RHOB)|393 (ARHGAP4)|409 (ARRB2)|463 (ZFHX3)|467 (ATF3)|598 (BCL2L1)|602 (BCL3)|694 (BTG1)|695 (BTK)|713 (C1QB)|714 (C1QC)|718 (C3)|719 (C3AR1)|728 (C5AR1)|752 (FMNL1)|920 (CD4)|942 (CD86)|963 (CD53)|972 (CD74)|1050 (CEBPA)|1051 (CEBPB)|1230 (CCR1)|1240 (CMKLR1)|1293 (COL6A3)|1435 (CSF1)|1436 (CSF1R)|1441 (CSF3R)|1445 (CSK)|1471 (CST3)|1522 (CTSZ)…
	M	GO|GO.BP	GO:0048869	cellular developmental process	3.14649e-13	3.58574e-08	170	154 (ADRB2)|388 (RHOB)|393 (ARHGAP4)|409 (ARRB2)|463 (ZFHX3)|467 (ATF3)|598 (BCL2L1)|602 (BCL3)|694 (BTG1)|695 (BTK)|714 (C1QC)|752 (FMNL1)|920 (CD4)|942 (CD86)|963 (CD53)|972 (CD74)|1050 (CEBPA)|1051 (CEBPB)|1230 (CCR1)|1240 (CMKLR1)|1293 (COL6A3)|1435 (CSF1)|1436 (CSF1R)|1441 (CSF3R)|1445 (CSK)|1522 (CTSZ)|1777 (DNASE2)|1794 (DOCK2)|1796 (DOK1)|1960 (EGR3)|2000 (ELF4)|2055 (CLN8)|2099 (ESR1)|21…
	M	GO|GO.BP	GO:0030595	leukocyte chemotaxis	3.43267e-13	3.91187e-08	28	719 (C3AR1)|728 (C5AR1)|972 (CD74)|1230 (CCR1)|1240 (CMKLR1)|1435 (CSF1)|1441 (CSF3R)|2185 (PTK2B)|2207 (FCER1G)|3570 (IL6R)|3603 (IL16)|3689 (ITGB2)|3958 (LGALS3)|4067 (LYN)|5054 (SERPINE1)|5293 (PIK3CD)|5294 (PIK3CG)|5641 (LGMN)|5880 (RAC2)|6279 (S100A8)|6280 (S100A9)|6347 (CCL2)|7226 (TRPM2)|7409 (VAV1)|8792 (TNFRSF11A)|11151 (CORO1A)|58191 (CXCL16)|63940 (GPSM3)
	M	GO|GO.BP	GO:0010646	regulation of cell communication	3.75041e-13	4.27396e-08	148	154 (ADRB2)|388 (RHOB)|393 (ARHGAP4)|409 (ARRB2)|467 (ATF3)|598 (BCL2L1)|602 (BCL3)|637 (BID)|718 (C3)|728 (C5AR1)|834 (CASP1)|920 (CD4)|929 (CD14)|933 (CD22)|942 (CD86)|972 (CD74)|1230 (CCR1)|1240 (CMKLR1)|1435 (CSF1)|1436 (CSF1R)|1445 (CSK)|1535 (CYBA)|1796 (DOK1)|1827 (RCAN1)|1844 (DUSP2)|2099 (ESR1)|2185 (PTK2B)|2268 (FGR)|2357 (FPR1)|2896 (GRN)|3059 (HCLS1)|3077 (HFE)|3162 (HMOX1)|3274 (HRH2…
	M	GO|GO.BP	GO:0098657	import into cell	4.9323e-13	5.62085e-08	60	60 (ACTB)|154 (ADRB2)|409 (ARRB2)|598 (BCL2L1)|718 (C3)|923 (CD6)|929 (CD14)|933 (CD22)|1445 (CSK)|1535 (CYBA)|1794 (DOCK2)|2055 (CLN8)|2207 (FCER1G)|2212 (FCGR2A)|2268 (FGR)|2350 (FOLR2)|3077 (HFE)|3683 (ITGAL)|3684 (ITGAM)|3689 (ITGB2)|3958 (LGALS3)|3959 (LGALS3BP)|4067 (LYN)|4360 (MRC1)|4481 (MSR1)|4688 (NCF2)|4689 (NCF4)|5054 (SERPINE1)|5294 (PIK3CG)|5336 (PLCG2)|5580 (PRKCD)|5770 (PTPN1)|578…
	M	GO|GO.BP	GO:0071219	cellular response to molecule of bacterial origin	6.24673e-13	7.11878e-08	27	834 (CASP1)|923 (CD6)|929 (CD14)|942 (CD86)|1051 (CEBPB)|3383 (ICAM1)|4057 (LTF)|4067 (LYN)|4360 (MRC1)|4793 (NFKBIB)|5054 (SERPINE1)|5724 (PTAFR)|5970 (RELA)|6347 (CCL2)|7040 (TGFB1)|7096 (TLR1)|7097 (TLR2)|7128 (TNFAIP3)|7133 (TNFRSF1B)|7538 (ZFP36)|10333 (TLR6)|22904 (SBNO2)|54209 (TREM2)|79155 (TNIP2)|84868 (HAVCR2)|114548 (NLRP3)|148022 (TICAM1)
	M	GO|GO.BP	GO:0051246	regulation of protein metabolic process	6.44899e-13	7.34927e-08	127	60 (ACTB)|154 (ADRB2)|409 (ARRB2)|467 (ATF3)|602 (BCL3)|637 (BID)|712 (C1QA)|713 (C1QB)|714 (C1QC)|718 (C3)|719 (C3AR1)|728 (C5AR1)|834 (CASP1)|920 (CD4)|942 (CD86)|972 (CD74)|1050 (CEBPA)|1051 (CEBPB)|1230 (CCR1)|1293 (COL6A3)|1435 (CSF1)|1436 (CSF1R)|1445 (CSK)|1471 (CST3)|1522 (CTSZ)|1536 (CYBB)|1827 (RCAN1)|1844 (DUSP2)|2055 (CLN8)|2185 (PTK2B)|2268 (FGR)|2350 (FOLR2)|2357 (FPR1)|2872 (MKNK2)…
	M	GO|GO.BP	GO:0048731	system development	6.88224e-13	7.843e-08	183	60 (ACTB)|154 (ADRB2)|162 (AP1B1)|215 (ABCD1)|388 (RHOB)|393 (ARHGAP4)|409 (ARRB2)|463 (ZFHX3)|467 (ATF3)|598 (BCL2L1)|602 (BCL3)|694 (BTG1)|695 (BTK)|713 (C1QB)|714 (C1QC)|718 (C3)|719 (C3AR1)|728 (C5AR1)|920 (CD4)|942 (CD86)|972 (CD74)|1050 (CEBPA)|1051 (CEBPB)|1230 (CCR1)|1240 (CMKLR1)|1293 (COL6A3)|1435 (CSF1)|1436 (CSF1R)|1441 (CSF3R)|1445 (CSK)|1522 (CTSZ)|1536 (CYBB)|1777 (DNASE2)|1794 (DO…
	M	GO|GO.BP	GO:0050729	positive regulation of inflammatory response	7.62307e-13	8.68725e-08	22	695 (BTK)|718 (C3)|923 (CD6)|1050 (CEBPA)|2207 (FCER1G)|3684 (ITGAM)|3689 (ITGB2)|4615 (MYD88)|5054 (SERPINE1)|5294 (PIK3CG)|5734 (PTGER4)|6279 (S100A8)|6280 (S100A9)|7052 (TGM2)|7097 (TLR2)|7132 (TNFRSF1A)|8673 (VAMP8)|8792 (TNFRSF11A)|10333 (TLR6)|51284 (TLR7)|63940 (GPSM3)|148022 (TICAM1)
	M	GO|GO.BP	GO:0023051	regulation of signaling	8.29867e-13	9.45716e-08	148	154 (ADRB2)|388 (RHOB)|393 (ARHGAP4)|409 (ARRB2)|467 (ATF3)|598 (BCL2L1)|602 (BCL3)|637 (BID)|718 (C3)|728 (C5AR1)|834 (CASP1)|920 (CD4)|929 (CD14)|933 (CD22)|942 (CD86)|972 (CD74)|1230 (CCR1)|1240 (CMKLR1)|1435 (CSF1)|1436 (CSF1R)|1445 (CSK)|1535 (CYBA)|1796 (DOK1)|1827 (RCAN1)|1844 (DUSP2)|2099 (ESR1)|2185 (PTK2B)|2268 (FGR)|2357 (FPR1)|2896 (GRN)|3059 (HCLS1)|3077 (HFE)|3162 (HMOX1)|3274 (HRH2…
	M	GO|GO.BP	GO:0002250	adaptive immune response	8.31093e-13	9.47113e-08	48	113 (ADCY7)|602 (BCL3)|695 (BTK)|712 (C1QA)|713 (C1QB)|714 (C1QC)|718 (C3)|920 (CD4)|923 (CD6)|942 (CD86)|972 (CD74)|1445 (CSK)|1520 (CTSS)|2185 (PTK2B)|2207 (FCER1G)|3077 (HFE)|3383 (ICAM1)|3566 (IL4R)|3570 (IL6R)|3635 (INPP5D)|3659 (IRF1)|4067 (LYN)|4791 (NFKB2)|5293 (PIK3CD)|5294 (PIK3CG)|5452 (POU2F2)|5580 (PRKCD)|5585 (PKN1)|5788 (PTPRC)|5971 (RELB)|6693 (SPN)|6778 (STAT6)|7040 (TGFB1)|7128 …
	M	GO|GO.BP	GO:0043303	mast cell degranulation	9.11401e-13	1.03863e-07	14	695 (BTK)|2207 (FCER1G)|2242 (FES)|2268 (FGR)|3162 (HMOX1)|3566 (IL4R)|4067 (LYN)|5293 (PIK3CD)|5294 (PIK3CG)|5880 (RAC2)|7462 (LAT2)|8673 (VAMP8)|8832 (CD84)|201294 (UNC13D)
	M	GO|GO.BP	GO:0044093	positive regulation of molecular function	1.07118e-12	1.22071e-07	90	154 (ADRB2)|241 (ALOX5AP)|393 (ARHGAP4)|637 (BID)|695 (BTK)|728 (C5AR1)|834 (CASP1)|920 (CD4)|972 (CD74)|1435 (CSF1)|1436 (CSF1R)|1445 (CSK)|1520 (CTSS)|1535 (CYBA)|1794 (DOCK2)|2099 (ESR1)|2185 (PTK2B)|2268 (FGR)|2357 (FPR1)|2769 (GNA15)|3059 (HCLS1)|3077 (HFE)|3303 (HSPA1A)|3383 (ICAM1)|3570 (IL6R)|3684 (ITGAM)|3689 (ITGB2)|3937 (LCP2)|3955 (LFNG)|3958 (LGALS3)|4057 (LTF)|4067 (LYN)|4615 (MYD88…
	M	GO|GO.BP	GO:0042127	regulation of cell proliferation	1.07603e-12	1.22624e-07	88	140 (ADORA3)|467 (ATF3)|598 (BCL2L1)|637 (BID)|694 (BTG1)|695 (BTK)|728 (C5AR1)|920 (CD4)|923 (CD6)|933 (CD22)|942 (CD86)|972 (CD74)|1050 (CEBPA)|1051 (CEBPB)|1435 (CSF1)|1436 (CSF1R)|1445 (CSK)|1522 (CTSZ)|1535 (CYBA)|1960 (EGR3)|2014 (EMP3)|2099 (ESR1)|2185 (PTK2B)|2242 (FES)|2350 (FOLR2)|2683 (B4GALT1)|3059 (HCLS1)|3109 (HLA-DMB)|3159 (HMGA1)|3162 (HMOX1)|3249 (HPN)|3303 (HSPA1A)|3566 (IL4R)|3…
	M	GO|GO.CC	GO:0070820	tertiary granule	1.08854e-12	1.2405e-07	24	963 (CD53)|1471 (CST3)|1509 (CTSD)|1520 (CTSS)|1535 (CYBA)|1536 (CYBB)|2207 (FCER1G)|2357 (FPR1)|3684 (ITGAM)|3687 (ITGAX)|3689 (ITGB2)|3958 (LGALS3)|4057 (LTF)|5199 (CFP)|5724 (PTAFR)|5768 (QSOX1)|7226 (TRPM2)|8673 (VAMP8)|10312 (TCIRG1)|23218 (NBEAL2)|25840 (METTL7A)|79792 (GSDMD)|79930 (DOK3)|81619 (TSPAN14)
	M	GO|GO.BP	GO:0048856	anatomical structure development	1.27144e-12	1.44893e-07	210	60 (ACTB)|154 (ADRB2)|162 (AP1B1)|215 (ABCD1)|388 (RHOB)|393 (ARHGAP4)|409 (ARRB2)|463 (ZFHX3)|467 (ATF3)|598 (BCL2L1)|602 (BCL3)|694 (BTG1)|695 (BTK)|713 (C1QB)|714 (C1QC)|718 (C3)|719 (C3AR1)|728 (C5AR1)|752 (FMNL1)|920 (CD4)|942 (CD86)|963 (CD53)|972 (CD74)|1050 (CEBPA)|1051 (CEBPB)|1230 (CCR1)|1240 (CMKLR1)|1293 (COL6A3)|1435 (CSF1)|1436 (CSF1R)|1441 (CSF3R)|1445 (CSK)|1471 (CST3)|1522 (CTSZ)…
	M	GO|GO.BP	GO:0002279	mast cell activation involved in immune response	1.29453e-12	1.47525e-07	14	695 (BTK)|2207 (FCER1G)|2242 (FES)|2268 (FGR)|3162 (HMOX1)|3566 (IL4R)|4067 (LYN)|5293 (PIK3CD)|5294 (PIK3CG)|5880 (RAC2)|7462 (LAT2)|8673 (VAMP8)|8832 (CD84)|201294 (UNC13D)
	M	GO|GO.CC	GO:0044459	plasma membrane part	1.61536e-12	1.84087e-07	125	113 (ADCY7)|140 (ADORA3)|154 (ADRB2)|388 (RHOB)|409 (ARRB2)|719 (C3AR1)|728 (C5AR1)|920 (CD4)|923 (CD6)|929 (CD14)|933 (CD22)|942 (CD86)|951 (CD37)|963 (CD53)|972 (CD74)|1230 (CCR1)|1240 (CMKLR1)|1436 (CSF1R)|1439 (CSF2RB)|1441 (CSF3R)|1535 (CYBA)|1536 (CYBB)|2124 (EVI2B)|2185 (PTK2B)|2207 (FCER1G)|2242 (FES)|2268 (FGR)|2350 (FOLR2)|2683 (B4GALT1)|2687 (GGT5)|2769 (GNA15)|2857 (GPR34)|3077 (HFE)|…
	M	GO|GO.BP	GO:0050793	regulation of developmental process	1.6187e-12	1.84467e-07	118	154 (ADRB2)|388 (RHOB)|393 (ARHGAP4)|409 (ARRB2)|463 (ZFHX3)|694 (BTG1)|695 (BTK)|714 (C1QC)|718 (C3)|719 (C3AR1)|728 (C5AR1)|752 (FMNL1)|920 (CD4)|942 (CD86)|963 (CD53)|972 (CD74)|1050 (CEBPA)|1051 (CEBPB)|1230 (CCR1)|1240 (CMKLR1)|1435 (CSF1)|1436 (CSF1R)|1441 (CSF3R)|1471 (CST3)|1522 (CTSZ)|1536 (CYBB)|1960 (EGR3)|2099 (ESR1)|2124 (EVI2B)|2185 (PTK2B)|2242 (FES)|2268 (FGR)|3059 (HCLS1)|3099 (H…
	M	GO|GO.BP	GO:0002448	mast cell mediated immunity	1.82085e-12	2.07504e-07	14	695 (BTK)|2207 (FCER1G)|2242 (FES)|2268 (FGR)|3162 (HMOX1)|3566 (IL4R)|4067 (LYN)|5293 (PIK3CD)|5294 (PIK3CG)|5880 (RAC2)|7462 (LAT2)|8673 (VAMP8)|8832 (CD84)|201294 (UNC13D)
	M	GO|GO.BP	GO:0050794	regulation of cellular process	2.15419e-12	2.45492e-07	332	60 (ACTB)|113 (ADCY7)|140 (ADORA3)|154 (ADRB2)|215 (ABCD1)|388 (RHOB)|393 (ARHGAP4)|409 (ARRB2)|463 (ZFHX3)|467 (ATF3)|598 (BCL2L1)|602 (BCL3)|637 (BID)|694 (BTG1)|695 (BTK)|714 (C1QC)|718 (C3)|719 (C3AR1)|728 (C5AR1)|752 (FMNL1)|834 (CASP1)|920 (CD4)|923 (CD6)|929 (CD14)|933 (CD22)|942 (CD86)|951 (CD37)|963 (CD53)|972 (CD74)|1040 (CDS1)|1050 (CEBPA)|1051 (CEBPB)|1230 (CCR1)|1240 (CMKLR1)|1293 (C…
	M	GO|GO.MF	GO:0005515	protein binding	2.231e-12	2.54245e-07	351	60 (ACTB)|154 (ADRB2)|162 (AP1B1)|215 (ABCD1)|241 (ALOX5AP)|388 (RHOB)|393 (ARHGAP4)|409 (ARRB2)|463 (ZFHX3)|467 (ATF3)|598 (BCL2L1)|602 (BCL3)|637 (BID)|694 (BTG1)|695 (BTK)|712 (C1QA)|713 (C1QB)|714 (C1QC)|718 (C3)|728 (C5AR1)|752 (FMNL1)|834 (CASP1)|920 (CD4)|923 (CD6)|929 (CD14)|933 (CD22)|942 (CD86)|951 (CD37)|963 (CD53)|972 (CD74)|1050 (CEBPA)|1051 (CEBPB)|1230 (CCR1)|1240 (CMKLR1)|1435 (CS…
	M	GO|GO.CC	GO:0044437	vacuolar part	2.54605e-12	2.90148e-07	44	162 (AP1B1)|215 (ABCD1)|718 (C3)|719 (C3AR1)|972 (CD74)|1509 (CTSD)|1520 (CTSS)|2357 (FPR1)|2588 (GALNS)|2683 (B4GALT1)|2799 (GNS)|2896 (GRN)|3073 (HEXA)|3109 (HLA-DMB)|3111 (HLA-DOA)|4353 (MPO)|4669 (NAGLU)|4758 (NEU1)|5580 (PRKCD)|5641 (LGMN)|6948 (TCN2)|7107 (GPR137B)|7226 (TRPM2)|7805 (LAPTM5)|8635 (RNASET2)|8673 (VAMP8)|9145 (SYNGR1)|10312 (TCIRG1)|10855 (HPSE)|11010 (GLIPR1)|23324 (MAN2B2)|…
	M	GO|GO.BP	GO:0008283	cell proliferation	2.6945e-12	3.07065e-07	101	140 (ADORA3)|467 (ATF3)|598 (BCL2L1)|637 (BID)|694 (BTG1)|695 (BTK)|728 (C5AR1)|920 (CD4)|923 (CD6)|933 (CD22)|942 (CD86)|972 (CD74)|1050 (CEBPA)|1051 (CEBPB)|1435 (CSF1)|1436 (CSF1R)|1445 (CSK)|1522 (CTSZ)|1535 (CYBA)|1794 (DOCK2)|1960 (EGR3)|2000 (ELF4)|2014 (EMP3)|2099 (ESR1)|2185 (PTK2B)|2242 (FES)|2350 (FOLR2)|2683 (B4GALT1)|3059 (HCLS1)|3109 (HLA-DMB)|3159 (HMGA1)|3162 (HMOX1)|3249 (HPN)|33…
	M	GO|GO.BP	GO:0045576	mast cell activation	3.10364e-12	3.53691e-07	15	695 (BTK)|2207 (FCER1G)|2242 (FES)|2268 (FGR)|3162 (HMOX1)|3566 (IL4R)|3937 (LCP2)|4067 (LYN)|5293 (PIK3CD)|5294 (PIK3CG)|5880 (RAC2)|7462 (LAT2)|8673 (VAMP8)|8832 (CD84)|201294 (UNC13D)
	M	GO|GO.BP	GO:0007249	I-kappaB kinase/NF-kappaB signaling	4.37162e-12	4.9819e-07	29	602 (BCL3)|695 (BTK)|834 (CASP1)|920 (CD4)|929 (CD14)|972 (CD74)|2099 (ESR1)|3162 (HMOX1)|3956 (LGALS1)|4057 (LTF)|4615 (MYD88)|5970 (RELA)|5971 (RELB)|7052 (TGM2)|7097 (TLR2)|7128 (TNFAIP3)|7132 (TNFRSF1A)|7188 (TRAF5)|9020 (MAP3K14)|10333 (TLR6)|10783 (NEK6)|23636 (NUP62)|51284 (TLR7)|57153 (SLC44A2)|79155 (TNIP2)|84433 (CARD11)|84807 (NFKBID)|148022 (TICAM1)|222643 (UNC5CL)
	M	GO|GO.BP	GO:0060326	cell chemotaxis	4.66927e-12	5.32111e-07	31	409 (ARRB2)|719 (C3AR1)|728 (C5AR1)|972 (CD74)|1230 (CCR1)|1240 (CMKLR1)|1435 (CSF1)|1441 (CSF3R)|1960 (EGR3)|2185 (PTK2B)|2207 (FCER1G)|3570 (IL6R)|3603 (IL16)|3689 (ITGB2)|3958 (LGALS3)|4067 (LYN)|5054 (SERPINE1)|5293 (PIK3CD)|5294 (PIK3CG)|5580 (PRKCD)|5641 (LGMN)|5880 (RAC2)|6279 (S100A8)|6280 (S100A9)|6347 (CCL2)|7226 (TRPM2)|7409 (VAV1)|8792 (TNFRSF11A)|11151 (CORO1A)|58191 (CXCL16)|63940 (…
	M	GO|GO.BP	GO:0030154	cell differentiation	5.01671e-12	5.71704e-07	161	154 (ADRB2)|388 (RHOB)|393 (ARHGAP4)|409 (ARRB2)|463 (ZFHX3)|467 (ATF3)|598 (BCL2L1)|602 (BCL3)|694 (BTG1)|695 (BTK)|714 (C1QC)|920 (CD4)|942 (CD86)|963 (CD53)|972 (CD74)|1050 (CEBPA)|1051 (CEBPB)|1230 (CCR1)|1240 (CMKLR1)|1293 (COL6A3)|1435 (CSF1)|1436 (CSF1R)|1441 (CSF3R)|1445 (CSK)|1522 (CTSZ)|1777 (DNASE2)|1794 (DOCK2)|1796 (DOK1)|1960 (EGR3)|2000 (ELF4)|2055 (CLN8)|2099 (ESR1)|2124 (EVI2B)|2…
	M	GO|GO.BP	GO:0065008	regulation of biological quality	5.0615e-12	5.76808e-07	155	60 (ACTB)|113 (ADCY7)|154 (ADRB2)|215 (ABCD1)|388 (RHOB)|393 (ARHGAP4)|409 (ARRB2)|598 (BCL2L1)|602 (BCL3)|637 (BID)|695 (BTK)|718 (C3)|719 (C3AR1)|728 (C5AR1)|752 (FMNL1)|920 (CD4)|972 (CD74)|1050 (CEBPA)|1051 (CEBPB)|1230 (CCR1)|1240 (CMKLR1)|1435 (CSF1)|1436 (CSF1R)|1445 (CSK)|1522 (CTSZ)|1535 (CYBA)|1777 (DNASE2)|2055 (CLN8)|2099 (ESR1)|2162 (F13A1)|2185 (PTK2B)|2207 (FCER1G)|2242 (FES)|2268 …
	M	GO|GO.CC	GO:0098589	membrane region	5.66744e-12	6.45862e-07	32	695 (BTK)|920 (CD4)|929 (CD14)|1445 (CSK)|1509 (CTSD)|1820 (ARID3A)|2185 (PTK2B)|3162 (HMOX1)|3383 (ICAM1)|3635 (INPP5D)|3684 (ITGAM)|3689 (ITGB2)|3937 (LCP2)|3945 (LDHB)|4067 (LYN)|5045 (FURIN)|5788 (PTPRC)|6404 (SELPLG)|6778 (STAT6)|7046 (TGFBR1)|7096 (TLR1)|7097 (TLR2)|7132 (TNFRSF1A)|7133 (TNFRSF1B)|7462 (LAT2)|10287 (RGS19)|10333 (TLR6)|10855 (HPSE)|23636 (NUP62)|79180 (EFHD2)|84433 (CARD11)…
	M	GO|GO.BP	GO:0046631	alpha-beta T cell activation	7.47044e-12	8.51332e-07	21	602 (BCL3)|942 (CD86)|1794 (DOCK2)|2000 (ELF4)|3077 (HFE)|3566 (IL4R)|3570 (IL6R)|3659 (IRF1)|4860 (PNP)|5734 (PTGER4)|5788 (PTPRC)|5971 (RELB)|6693 (SPN)|6778 (STAT6)|8764 (TNFRSF14)|9308 (CD83)|10148 (EBI3)|54440 (SASH3)|64926 (RASAL3)|84807 (NFKBID)|114548 (NLRP3)
	M	GO|GO.BP	GO:0002703	regulation of leukocyte mediated immunity	8.36175e-12	9.52905e-07	25	409 (ARRB2)|695 (BTK)|718 (C3)|2207 (FCER1G)|2242 (FES)|2268 (FGR)|3077 (HFE)|3162 (HMOX1)|3566 (IL4R)|3684 (ITGAM)|3689 (ITGB2)|4067 (LYN)|5724 (PTAFR)|5788 (PTPRC)|5880 (RAC2)|6778 (STAT6)|7040 (TGFB1)|7409 (VAV1)|8673 (VAMP8)|8832 (CD84)|54440 (SASH3)|84868 (HAVCR2)|114548 (NLRP3)|148022 (TICAM1)|201294 (UNC13D)
	M	GO|GO.BP	GO:0002685	regulation of leukocyte migration	8.43413e-12	9.61153e-07	24	719 (C3AR1)|728 (C5AR1)|972 (CD74)|1230 (CCR1)|1240 (CMKLR1)|1435 (CSF1)|2185 (PTK2B)|3162 (HMOX1)|3383 (ICAM1)|3570 (IL6R)|3958 (LGALS3)|4067 (LYN)|5054 (SERPINE1)|5641 (LGMN)|5724 (PTAFR)|5734 (PTGER4)|5880 (RAC2)|6347 (CCL2)|6693 (SPN)|6793 (STK10)|7040 (TGFB1)|8764 (TNFRSF14)|63940 (GPSM3)|81704 (DOCK8)
	M	GO|GO.BP	GO:1902105	regulation of leukocyte differentiation	8.52167e-12	9.71129e-07	29	695 (BTK)|714 (C1QC)|920 (CD4)|942 (CD86)|972 (CD74)|1051 (CEBPB)|1230 (CCR1)|1435 (CSF1)|1960 (EGR3)|2124 (EVI2B)|3059 (HCLS1)|3111 (HLA-DOA)|3566 (IL4R)|3635 (INPP5D)|3659 (IRF1)|4057 (LTF)|4067 (LYN)|4860 (PNP)|5788 (PTPRC)|7040 (TGFB1)|7305 (TYROBP)|8808 (IL1RL2)|9308 (CD83)|54440 (SASH3)|84433 (CARD11)|84807 (NFKBID)|84959 (UBASH3B)|114548 (NLRP3)|150372 (NFAM1)
	M	GO|GO.BP	GO:0043300	regulation of leukocyte degranulation	8.95298e-12	1.02028e-06	13	2207 (FCER1G)|2242 (FES)|2268 (FGR)|3162 (HMOX1)|3566 (IL4R)|3684 (ITGAM)|3689 (ITGB2)|4067 (LYN)|5724 (PTAFR)|5880 (RAC2)|8673 (VAMP8)|8832 (CD84)|201294 (UNC13D)
	M	GO|GO.BP	GO:0002573	myeloid leukocyte differentiation	9.36898e-12	1.06769e-06	25	714 (C1QC)|920 (CD4)|972 (CD74)|1050 (CEBPA)|1051 (CEBPB)|1230 (CCR1)|1435 (CSF1)|1436 (CSF1R)|2124 (EVI2B)|2207 (FCER1G)|3059 (HCLS1)|3635 (INPP5D)|3726 (JUNB)|4057 (LTF)|4067 (LYN)|5293 (PIK3CD)|5971 (RELB)|7040 (TGFB1)|7097 (TLR2)|7305 (TYROBP)|8792 (TNFRSF11A)|22904 (SBNO2)|54209 (TREM2)|55509 (BATF3)|84959 (UBASH3B)
	M	GO|GO.CC	GO:0045121	membrane raft	1.02288e-11	1.16568e-06	31	695 (BTK)|920 (CD4)|929 (CD14)|1445 (CSK)|1509 (CTSD)|1820 (ARID3A)|2185 (PTK2B)|3162 (HMOX1)|3383 (ICAM1)|3635 (INPP5D)|3684 (ITGAM)|3689 (ITGB2)|3937 (LCP2)|3945 (LDHB)|4067 (LYN)|5045 (FURIN)|5788 (PTPRC)|6404 (SELPLG)|6778 (STAT6)|7046 (TGFBR1)|7096 (TLR1)|7097 (TLR2)|7132 (TNFRSF1A)|7133 (TNFRSF1B)|7462 (LAT2)|10287 (RGS19)|10333 (TLR6)|10855 (HPSE)|79180 (EFHD2)|84433 (CARD11)|146760 (RTN4R…
	M	GO|GO.CC	GO:0098857	membrane microdomain	1.11389e-11	1.26939e-06	31	695 (BTK)|920 (CD4)|929 (CD14)|1445 (CSK)|1509 (CTSD)|1820 (ARID3A)|2185 (PTK2B)|3162 (HMOX1)|3383 (ICAM1)|3635 (INPP5D)|3684 (ITGAM)|3689 (ITGB2)|3937 (LCP2)|3945 (LDHB)|4067 (LYN)|5045 (FURIN)|5788 (PTPRC)|6404 (SELPLG)|6778 (STAT6)|7046 (TGFBR1)|7096 (TLR1)|7097 (TLR2)|7132 (TNFRSF1A)|7133 (TNFRSF1B)|7462 (LAT2)|10287 (RGS19)|10333 (TLR6)|10855 (HPSE)|79180 (EFHD2)|84433 (CARD11)|146760 (RTN4R…
	M	GO|GO.BP	GO:0030099	myeloid cell differentiation	1.19602e-11	1.36299e-06	36	714 (C1QC)|920 (CD4)|972 (CD74)|1050 (CEBPA)|1051 (CEBPB)|1230 (CCR1)|1435 (CSF1)|1436 (CSF1R)|1441 (CSF3R)|1777 (DNASE2)|2124 (EVI2B)|2185 (PTK2B)|2207 (FCER1G)|2242 (FES)|3059 (HCLS1)|3303 (HSPA1A)|3635 (INPP5D)|3726 (JUNB)|3958 (LGALS3)|4057 (LTF)|4067 (LYN)|5293 (PIK3CD)|5971 (RELB)|7040 (TGFB1)|7097 (TLR2)|7305 (TYROBP)|7538 (ZFP36)|8792 (TNFRSF11A)|10163 (WASF2)|10320 (IKZF1)|22904 (SBNO2)|…
	M	GO|GO.BP	GO:0042129	regulation of T cell proliferation	1.37929e-11	1.57184e-06	22	920 (CD4)|923 (CD6)|942 (CD86)|1051 (CEBPB)|3109 (HLA-DMB)|3570 (IL6R)|3659 (IRF1)|3958 (LGALS3)|4860 (PNP)|5788 (PTPRC)|5880 (RAC2)|6693 (SPN)|7040 (TGFB1)|8764 (TNFRSF14)|10148 (EBI3)|11151 (CORO1A)|23308 (ICOSLG)|30835 (CD209)|54440 (SASH3)|64926 (RASAL3)|84433 (CARD11)|84868 (HAVCR2)
	M	GO|GO.BP	GO:0043067	regulation of programmed cell death	1.53532e-11	1.74965e-06	82	388 (RHOB)|409 (ARRB2)|467 (ATF3)|598 (BCL2L1)|602 (BCL3)|637 (BID)|694 (BTG1)|695 (BTK)|728 (C5AR1)|834 (CASP1)|972 (CD74)|1051 (CEBPB)|1436 (CSF1R)|1522 (CTSZ)|1960 (EGR3)|2055 (CLN8)|2099 (ESR1)|2124 (EVI2B)|2185 (PTK2B)|2207 (FCER1G)|2683 (B4GALT1)|3059 (HCLS1)|3162 (HMOX1)|3249 (HPN)|3303 (HSPA1A)|3383 (ICAM1)|3635 (INPP5D)|3663 (IRF5)|3956 (LGALS1)|3958 (LGALS3)|4057 (LTF)|4067 (LYN)|4353 (…
	M	GO|GO.BP	GO:0010941	regulation of cell death	1.72375e-11	1.96438e-06	86	388 (RHOB)|409 (ARRB2)|467 (ATF3)|598 (BCL2L1)|602 (BCL3)|637 (BID)|694 (BTG1)|695 (BTK)|728 (C5AR1)|834 (CASP1)|972 (CD74)|1051 (CEBPB)|1436 (CSF1R)|1522 (CTSZ)|1960 (EGR3)|2055 (CLN8)|2099 (ESR1)|2124 (EVI2B)|2185 (PTK2B)|2207 (FCER1G)|2683 (B4GALT1)|3059 (HCLS1)|3162 (HMOX1)|3249 (HPN)|3303 (HSPA1A)|3383 (ICAM1)|3635 (INPP5D)|3663 (IRF5)|3684 (ITGAM)|3689 (ITGB2)|3956 (LGALS1)|3958 (LGALS3)|40…
	M	GO|GO.BP	GO:0008219	cell death	2.12614e-11	2.42295e-06	103	388 (RHOB)|409 (ARRB2)|467 (ATF3)|598 (BCL2L1)|602 (BCL3)|637 (BID)|694 (BTG1)|695 (BTK)|728 (C5AR1)|834 (CASP1)|929 (CD14)|972 (CD74)|1051 (CEBPB)|1436 (CSF1R)|1522 (CTSZ)|1777 (DNASE2)|1960 (EGR3)|2014 (EMP3)|2055 (CLN8)|2099 (ESR1)|2124 (EVI2B)|2185 (PTK2B)|2207 (FCER1G)|2683 (B4GALT1)|2872 (MKNK2)|3059 (HCLS1)|3099 (HK2)|3162 (HMOX1)|3249 (HPN)|3303 (HSPA1A)|3383 (ICAM1)|3570 (IL6R)|3635 (INP…
	M	GO|GO.BP	GO:1901701	cellular response to oxygen-containing compound	2.20074e-11	2.50796e-06	64	60 (ACTB)|113 (ADCY7)|154 (ADRB2)|388 (RHOB)|598 (BCL2L1)|695 (BTK)|834 (CASP1)|923 (CD6)|929 (CD14)|942 (CD86)|1051 (CEBPB)|1445 (CSK)|1535 (CYBA)|1536 (CYBB)|2099 (ESR1)|2185 (PTK2B)|2350 (FOLR2)|2769 (GNA15)|3383 (ICAM1)|3956 (LGALS1)|4057 (LTF)|4067 (LYN)|4353 (MPO)|4360 (MRC1)|4548 (MTR)|4793 (NFKBIB)|5029 (P2RY2)|5054 (SERPINE1)|5140 (PDE3B)|5176 (SERPINF1)|5294 (PIK3CG)|5580 (PRKCD)|5641 (…
	M	GO|GO.BP	GO:0042981	regulation of apoptotic process	2.48071e-11	2.82701e-06	81	388 (RHOB)|409 (ARRB2)|467 (ATF3)|598 (BCL2L1)|602 (BCL3)|637 (BID)|694 (BTG1)|695 (BTK)|728 (C5AR1)|834 (CASP1)|972 (CD74)|1051 (CEBPB)|1436 (CSF1R)|1522 (CTSZ)|1960 (EGR3)|2055 (CLN8)|2099 (ESR1)|2124 (EVI2B)|2185 (PTK2B)|2207 (FCER1G)|2683 (B4GALT1)|3059 (HCLS1)|3162 (HMOX1)|3249 (HPN)|3303 (HSPA1A)|3383 (ICAM1)|3635 (INPP5D)|3663 (IRF5)|3956 (LGALS1)|3958 (LGALS3)|4057 (LTF)|4067 (LYN)|4353 (…
	M	GO|GO.BP	GO:0032501	multicellular organismal process	2.8421e-11	3.23886e-06	249	60 (ACTB)|113 (ADCY7)|140 (ADORA3)|154 (ADRB2)|162 (AP1B1)|215 (ABCD1)|388 (RHOB)|393 (ARHGAP4)|409 (ARRB2)|463 (ZFHX3)|467 (ATF3)|598 (BCL2L1)|602 (BCL3)|694 (BTG1)|695 (BTK)|713 (C1QB)|714 (C1QC)|718 (C3)|719 (C3AR1)|728 (C5AR1)|834 (CASP1)|920 (CD4)|923 (CD6)|929 (CD14)|942 (CD86)|972 (CD74)|1050 (CEBPA)|1051 (CEBPB)|1230 (CCR1)|1240 (CMKLR1)|1293 (COL6A3)|1435 (CSF1)|1436 (CSF1R)|1439 (CSF2RB…
	M	GO|GO.BP	GO:0065009	regulation of molecular function	2.89597e-11	3.30025e-06	132	60 (ACTB)|140 (ADORA3)|154 (ADRB2)|241 (ALOX5AP)|393 (ARHGAP4)|409 (ARRB2)|602 (BCL3)|637 (BID)|695 (BTK)|718 (C3)|728 (C5AR1)|834 (CASP1)|920 (CD4)|972 (CD74)|1050 (CEBPA)|1240 (CMKLR1)|1293 (COL6A3)|1435 (CSF1)|1436 (CSF1R)|1445 (CSK)|1471 (CST3)|1520 (CTSS)|1522 (CTSZ)|1535 (CYBA)|1794 (DOCK2)|1827 (RCAN1)|1844 (DUSP2)|2099 (ESR1)|2185 (PTK2B)|2268 (FGR)|2357 (FPR1)|2769 (GNA15)|2896 (GRN)|305…
	M	GO|GO.BP	GO:0006915	apoptotic process	2.96247e-11	3.37603e-06	94	388 (RHOB)|409 (ARRB2)|467 (ATF3)|598 (BCL2L1)|602 (BCL3)|637 (BID)|694 (BTG1)|695 (BTK)|728 (C5AR1)|834 (CASP1)|929 (CD14)|972 (CD74)|1051 (CEBPB)|1436 (CSF1R)|1522 (CTSZ)|1777 (DNASE2)|1960 (EGR3)|2055 (CLN8)|2099 (ESR1)|2124 (EVI2B)|2185 (PTK2B)|2207 (FCER1G)|2683 (B4GALT1)|2872 (MKNK2)|3059 (HCLS1)|3099 (HK2)|3162 (HMOX1)|3249 (HPN)|3303 (HSPA1A)|3383 (ICAM1)|3570 (IL6R)|3635 (INPP5D)|3659 (I…
	M	GO|GO.BP	GO:0012501	programmed cell death	3.88861e-11	4.43146e-06	98	388 (RHOB)|409 (ARRB2)|467 (ATF3)|598 (BCL2L1)|602 (BCL3)|637 (BID)|694 (BTG1)|695 (BTK)|728 (C5AR1)|834 (CASP1)|929 (CD14)|972 (CD74)|1051 (CEBPB)|1436 (CSF1R)|1522 (CTSZ)|1777 (DNASE2)|1960 (EGR3)|2055 (CLN8)|2099 (ESR1)|2124 (EVI2B)|2185 (PTK2B)|2207 (FCER1G)|2683 (B4GALT1)|2872 (MKNK2)|3059 (HCLS1)|3099 (HK2)|3162 (HMOX1)|3249 (HPN)|3303 (HSPA1A)|3383 (ICAM1)|3570 (IL6R)|3635 (INPP5D)|3659 (I…
	M	GO|GO.BP	GO:0042113	B cell activation	4.6473e-11	5.29606e-06	30	602 (BCL3)|695 (BTK)|933 (CD22)|972 (CD74)|2185 (PTK2B)|3635 (INPP5D)|3955 (LFNG)|3956 (LGALS1)|4066 (LYL1)|4067 (LYN)|5293 (PIK3CD)|5336 (PLCG2)|5452 (POU2F2)|5580 (PRKCD)|5585 (PKN1)|5788 (PTPRC)|6778 (STAT6)|7040 (TGFB1)|7128 (TNFAIP3)|7462 (LAT2)|8935 (SKAP2)|23228 (PLCL2)|23308 (ICOSLG)|54440 (SASH3)|55024 (BANK1)|79155 (TNIP2)|84433 (CARD11)|112616 (CMTM7)|148022 (TICAM1)|150372 (NFAM1)
	M	GO|GO.BP	GO:0032879	regulation of localization	4.9029e-11	5.58734e-06	118	60 (ACTB)|140 (ADORA3)|154 (ADRB2)|388 (RHOB)|393 (ARHGAP4)|409 (ARRB2)|598 (BCL2L1)|637 (BID)|718 (C3)|719 (C3AR1)|728 (C5AR1)|834 (CASP1)|920 (CD4)|929 (CD14)|933 (CD22)|972 (CD74)|1051 (CEBPB)|1230 (CCR1)|1240 (CMKLR1)|1435 (CSF1)|1436 (CSF1R)|1445 (CSK)|1520 (CTSS)|1535 (CYBA)|1536 (CYBB)|1794 (DOCK2)|2185 (PTK2B)|2207 (FCER1G)|2242 (FES)|2268 (FGR)|3059 (HCLS1)|3077 (HFE)|3099 (HK2)|3162 (HM…
	M	GO|GO.CC	GO:0030659	cytoplasmic vesicle membrane	5.61004e-11	6.3932e-06	50	154 (ADRB2)|162 (AP1B1)|598 (BCL2L1)|719 (C3AR1)|728 (C5AR1)|920 (CD4)|929 (CD14)|963 (CD53)|972 (CD74)|1535 (CYBA)|1536 (CYBB)|2207 (FCER1G)|2212 (FCGR2A)|2215 (FCGR3B)|2357 (FPR1)|2683 (B4GALT1)|3683 (ITGAL)|3684 (ITGAM)|3687 (ITGAX)|3689 (ITGB2)|3958 (LGALS3)|4481 (MSR1)|5724 (PTAFR)|5788 (PTPRC)|5880 (RAC2)|6793 (STK10)|6892 (TAPBP)|7096 (TLR1)|7097 (TLR2)|7133 (TNFRSF1B)|7226 (TRPM2)|7305 (T…
	M	GO|GO.BP	GO:0002687	positive regulation of leukocyte migration	7.24111e-11	8.25196e-06	19	719 (C3AR1)|728 (C5AR1)|972 (CD74)|1230 (CCR1)|1240 (CMKLR1)|1435 (CSF1)|2185 (PTK2B)|3383 (ICAM1)|3570 (IL6R)|3958 (LGALS3)|5054 (SERPINE1)|5641 (LGMN)|5724 (PTAFR)|5880 (RAC2)|6693 (SPN)|7040 (TGFB1)|8764 (TNFRSF14)|63940 (GPSM3)|81704 (DOCK8)
	M	GO|GO.BP	GO:0071222	cellular response to lipopolysaccharide	7.24554e-11	8.25702e-06	24	834 (CASP1)|923 (CD6)|929 (CD14)|942 (CD86)|1051 (CEBPB)|3383 (ICAM1)|4057 (LTF)|4067 (LYN)|4360 (MRC1)|4793 (NFKBIB)|5054 (SERPINE1)|5724 (PTAFR)|5970 (RELA)|6347 (CCL2)|7040 (TGFB1)|7097 (TLR2)|7128 (TNFAIP3)|7133 (TNFRSF1B)|7538 (ZFP36)|22904 (SBNO2)|79155 (TNIP2)|84868 (HAVCR2)|114548 (NLRP3)|148022 (TICAM1)
	M	GO|GO.BP	GO:0097529	myeloid leukocyte migration	7.24554e-11	8.25702e-06	24	719 (C3AR1)|728 (C5AR1)|972 (CD74)|1230 (CCR1)|1240 (CMKLR1)|1435 (CSF1)|1441 (CSF3R)|2185 (PTK2B)|2207 (FCER1G)|3570 (IL6R)|3689 (ITGB2)|3958 (LGALS3)|4067 (LYN)|5054 (SERPINE1)|5293 (PIK3CD)|5294 (PIK3CG)|5641 (LGMN)|5734 (PTGER4)|5880 (RAC2)|6279 (S100A8)|6280 (S100A9)|6347 (CCL2)|7409 (VAV1)|8792 (TNFRSF11A)
	M	GO|GO.BP	GO:0007275	multicellular organism development	7.32343e-11	8.34579e-06	191	60 (ACTB)|154 (ADRB2)|162 (AP1B1)|215 (ABCD1)|388 (RHOB)|393 (ARHGAP4)|409 (ARRB2)|463 (ZFHX3)|467 (ATF3)|598 (BCL2L1)|602 (BCL3)|694 (BTG1)|695 (BTK)|713 (C1QB)|714 (C1QC)|718 (C3)|719 (C3AR1)|728 (C5AR1)|920 (CD4)|942 (CD86)|972 (CD74)|1050 (CEBPA)|1051 (CEBPB)|1230 (CCR1)|1240 (CMKLR1)|1293 (COL6A3)|1435 (CSF1)|1436 (CSF1R)|1441 (CSF3R)|1445 (CSK)|1522 (CTSZ)|1536 (CYBB)|1777 (DNASE2)|1794 (DO…
	M	GO|GO.BP	GO:0030217	T cell differentiation	7.40543e-11	8.43923e-06	26	602 (BCL3)|920 (CD4)|942 (CD86)|972 (CD74)|1794 (DOCK2)|1960 (EGR3)|2207 (FCER1G)|3111 (HLA-DOA)|3566 (IL4R)|3659 (IRF1)|3955 (LFNG)|4860 (PNP)|5293 (PIK3CD)|5734 (PTGER4)|5788 (PTPRC)|5971 (RELB)|6693 (SPN)|6778 (STAT6)|7040 (TGFB1)|7409 (VAV1)|8808 (IL1RL2)|9308 (CD83)|54440 (SASH3)|84433 (CARD11)|84807 (NFKBID)|114548 (NLRP3)
	M	GO|GO.BP	GO:0006793	phosphorus metabolic process	8.33479e-11	9.49833e-06	132	60 (ACTB)|113 (ADCY7)|154 (ADRB2)|215 (ABCD1)|409 (ARRB2)|467 (ATF3)|637 (BID)|695 (BTK)|718 (C3)|728 (C5AR1)|920 (CD4)|942 (CD86)|972 (CD74)|1040 (CDS1)|1050 (CEBPA)|1230 (CCR1)|1435 (CSF1)|1436 (CSF1R)|1439 (CSF2RB)|1445 (CSK)|1827 (RCAN1)|1844 (DUSP2)|2027 (ENO3)|2055 (CLN8)|2099 (ESR1)|2185 (PTK2B)|2242 (FES)|2268 (FGR)|2357 (FPR1)|2533 (FYB1)|2872 (MKNK2)|3059 (HCLS1)|3077 (HFE)|3099 (HK2)|3…
	M	GO|GO.BP	GO:0065007	biological regulation	8.49373e-11	9.67946e-06	365	60 (ACTB)|113 (ADCY7)|140 (ADORA3)|154 (ADRB2)|215 (ABCD1)|241 (ALOX5AP)|388 (RHOB)|393 (ARHGAP4)|409 (ARRB2)|463 (ZFHX3)|467 (ATF3)|598 (BCL2L1)|602 (BCL3)|637 (BID)|694 (BTG1)|695 (BTK)|712 (C1QA)|713 (C1QB)|714 (C1QC)|718 (C3)|719 (C3AR1)|728 (C5AR1)|752 (FMNL1)|834 (CASP1)|920 (CD4)|923 (CD6)|929 (CD14)|933 (CD22)|942 (CD86)|951 (CD37)|963 (CD53)|972 (CD74)|1040 (CDS1)|1050 (CEBPA)|1051 (CEBP…
	M	GO|GO.BP	GO:0050866	negative regulation of cell activation	8.73344e-11	9.95262e-06	23	695 (BTK)|942 (CD86)|972 (CD74)|1051 (CEBPB)|3077 (HFE)|3162 (HMOX1)|3566 (IL4R)|3635 (INPP5D)|3659 (IRF1)|3958 (LGALS3)|4067 (LYN)|5580 (PRKCD)|5585 (PKN1)|5788 (PTPRC)|6693 (SPN)|7040 (TGFB1)|7128 (TNFAIP3)|8764 (TNFRSF14)|8832 (CD84)|55024 (BANK1)|84807 (NFKBID)|84868 (HAVCR2)|84959 (UBASH3B)
	M	GO|GO.BP	GO:0002429	immune response-activating cell surface receptor signaling pathway	9.35637e-11	1.06625e-05	35	60 (ACTB)|695 (BTK)|719 (C3AR1)|728 (C5AR1)|920 (CD4)|933 (CD22)|1240 (CMKLR1)|1445 (CSK)|2207 (FCER1G)|2212 (FCGR2A)|2268 (FGR)|2357 (FPR1)|2533 (FYB1)|3635 (INPP5D)|3937 (LCP2)|3958 (LGALS3)|4067 (LYN)|5293 (PIK3CD)|5336 (PLCG2)|5580 (PRKCD)|5788 (PTPRC)|5970 (RELA)|5971 (RELB)|7409 (VAV1)|7462 (LAT2)|9404 (LPXN)|10163 (WASF2)|10603 (SH2B2)|23228 (PLCL2)|23308 (ICOSLG)|30835 (CD209)|84433 (CARD…
	M	GO|GO.BP	GO:0032675	regulation of interleukin-6 production	9.70874e-11	1.10641e-05	19	409 (ARRB2)|1051 (CEBPB)|1445 (CSK)|1535 (CYBA)|2207 (FCER1G)|3570 (IL6R)|3635 (INPP5D)|4615 (MYD88)|5724 (PTAFR)|7096 (TLR1)|7097 (TLR2)|7128 (TNFAIP3)|8808 (IL1RL2)|9261 (MAPKAPK2)|10333 (TLR6)|51284 (TLR7)|55024 (BANK1)|84868 (HAVCR2)|148022 (TICAM1)
	M	GO|GO.BP	GO:0001818	negative regulation of cytokine production	1.05546e-10	1.2028e-05	27	113 (ADCY7)|215 (ABCD1)|409 (ARRB2)|602 (BCL3)|695 (BTK)|1240 (CMKLR1)|1445 (CSK)|3077 (HFE)|3162 (HMOX1)|3635 (INPP5D)|4057 (LTF)|5045 (FURIN)|5734 (PTGER4)|5788 (PTPRC)|5971 (RELB)|7040 (TGFB1)|7128 (TNFAIP3)|7318 (UBA7)|7538 (ZFP36)|8832 (CD84)|9308 (CD83)|10333 (TLR6)|55024 (BANK1)|63906 (GPATCH3)|79132 (DHX58)|84868 (HAVCR2)|114548 (NLRP3)
	M	GO|GO.CC	GO:0045335	phagocytic vesicle	1.1217e-10	1.27829e-05	19	752 (FMNL1)|1535 (CYBA)|1536 (CYBB)|3693 (ITGB5)|4057 (LTF)|4688 (NCF2)|4689 (NCF4)|5880 (RAC2)|6892 (TAPBP)|7096 (TLR1)|7097 (TLR2)|8673 (VAMP8)|10312 (TCIRG1)|10333 (TLR6)|11151 (CORO1A)|51284 (TLR7)|55647 (RAB20)|81622 (UNC93B1)|122618 (PLD4)
	M	GO|GO.CC	GO:0043235	receptor complex	1.15762e-10	1.31923e-05	34	154 (ADRB2)|920 (CD4)|923 (CD6)|929 (CD14)|972 (CD74)|1436 (CSF1R)|1439 (CSF2RB)|1441 (CSF3R)|2185 (PTK2B)|3077 (HFE)|3566 (IL4R)|3570 (IL6R)|3682 (ITGAE)|3683 (ITGAL)|3684 (ITGAM)|3687 (ITGAX)|3689 (ITGB2)|3693 (ITGB5)|4067 (LYN)|6256 (RXRA)|7046 (TGFBR1)|7096 (TLR1)|7097 (TLR2)|7132 (TNFRSF1A)|7133 (TNFRSF1B)|7188 (TRAF5)|9429 (ABCG2)|10148 (EBI3)|10333 (TLR6)|23654 (PLXNB2)|26090 (ABHD12)|5128…
	M	GO|GO.BP	GO:1903706	regulation of hemopoiesis	1.2176e-10	1.38757e-05	35	695 (BTK)|714 (C1QC)|920 (CD4)|942 (CD86)|972 (CD74)|1051 (CEBPB)|1230 (CCR1)|1435 (CSF1)|1441 (CSF3R)|1960 (EGR3)|2124 (EVI2B)|2185 (PTK2B)|2242 (FES)|3059 (HCLS1)|3111 (HLA-DOA)|3303 (HSPA1A)|3566 (IL4R)|3635 (INPP5D)|3659 (IRF1)|3958 (LGALS3)|4057 (LTF)|4067 (LYN)|4860 (PNP)|5788 (PTPRC)|7040 (TGFB1)|7305 (TYROBP)|7538 (ZFP36)|8808 (IL1RL2)|9308 (CD83)|54440 (SASH3)|84433 (CARD11)|84807 (NFKBI…
	M	GO|GO.CC	GO:0012506	vesicle membrane	1.47538e-10	1.68135e-05	50	154 (ADRB2)|162 (AP1B1)|598 (BCL2L1)|719 (C3AR1)|728 (C5AR1)|920 (CD4)|929 (CD14)|963 (CD53)|972 (CD74)|1535 (CYBA)|1536 (CYBB)|2207 (FCER1G)|2212 (FCGR2A)|2215 (FCGR3B)|2357 (FPR1)|2683 (B4GALT1)|3683 (ITGAL)|3684 (ITGAM)|3687 (ITGAX)|3689 (ITGB2)|3958 (LGALS3)|4481 (MSR1)|5724 (PTAFR)|5788 (PTPRC)|5880 (RAC2)|6793 (STK10)|6892 (TAPBP)|7096 (TLR1)|7097 (TLR2)|7133 (TNFRSF1B)|7226 (TRPM2)|7305 (T…
	M	GO|GO.BP	GO:0002768	immune response-regulating cell surface receptor signaling pathway	1.7142e-10	1.9535e-05	36	60 (ACTB)|695 (BTK)|719 (C3AR1)|728 (C5AR1)|920 (CD4)|933 (CD22)|1240 (CMKLR1)|1445 (CSK)|2207 (FCER1G)|2212 (FCGR2A)|2268 (FGR)|2357 (FPR1)|2533 (FYB1)|3635 (INPP5D)|3937 (LCP2)|3958 (LGALS3)|4067 (LYN)|4772 (NFATC1)|5293 (PIK3CD)|5336 (PLCG2)|5580 (PRKCD)|5788 (PTPRC)|5970 (RELA)|5971 (RELB)|7409 (VAV1)|7462 (LAT2)|9404 (LPXN)|10163 (WASF2)|10603 (SH2B2)|23228 (PLCL2)|23308 (ICOSLG)|30835 (CD20…
	M	GO|GO.BP	GO:0032479	regulation of type I interferon production	1.80048e-10	2.05182e-05	18	929 (CD14)|3659 (IRF1)|3663 (IRF5)|4615 (MYD88)|4791 (NFKB2)|5336 (PLCG2)|5970 (RELA)|5971 (RELB)|6778 (STAT6)|7097 (TLR2)|7128 (TNFAIP3)|7318 (UBA7)|23220 (DTX4)|51284 (TLR7)|63906 (GPATCH3)|79132 (DHX58)|84868 (HAVCR2)|148022 (TICAM1)
	M	GO|GO.CC	GO:0034774	secretory granule lumen	1.9263e-10	2.19521e-05	30	718 (C3)|1509 (CTSD)|1522 (CTSZ)|1794 (DOCK2)|2162 (F13A1)|2268 (FGR)|2588 (GALNS)|2799 (GNS)|2896 (GRN)|3101 (HK3)|3959 (LGALS3BP)|4057 (LTF)|4353 (MPO)|4758 (NEU1)|4860 (PNP)|5054 (SERPINE1)|5199 (CFP)|5580 (PRKCD)|5768 (QSOX1)|6279 (S100A8)|6280 (S100A9)|7040 (TGFB1)|8635 (RNASET2)|9535 (GMFG)|10855 (HPSE)|23406 (COTL1)|79792 (GSDMD)|83706 (FERMT3)|201294 (UNC13D)|387921 (NHLRC3)
	M	GO|GO.BP	GO:0006909	phagocytosis	2.05156e-10	2.33795e-05	31	60 (ACTB)|718 (C3)|929 (CD14)|1445 (CSK)|1535 (CYBA)|1794 (DOCK2)|2207 (FCER1G)|2212 (FCGR2A)|2268 (FGR)|3683 (ITGAL)|3684 (ITGAM)|3689 (ITGB2)|4067 (LYN)|4481 (MSR1)|4688 (NCF2)|4689 (NCF4)|5336 (PLCG2)|5580 (PRKCD)|5788 (PTPRC)|6347 (CCL2)|7040 (TGFB1)|7052 (TGM2)|7097 (TLR2)|7409 (VAV1)|10163 (WASF2)|11151 (CORO1A)|54209 (TREM2)|55647 (RAB20)|64581 (CLEC7A)|122618 (PLD4)|201294 (UNC13D)
	M	GO|GO.BP	GO:0032606	type I interferon production	2.09177e-10	2.38378e-05	18	929 (CD14)|3659 (IRF1)|3663 (IRF5)|4615 (MYD88)|4791 (NFKB2)|5336 (PLCG2)|5970 (RELA)|5971 (RELB)|6778 (STAT6)|7097 (TLR2)|7128 (TNFAIP3)|7318 (UBA7)|23220 (DTX4)|51284 (TLR7)|63906 (GPATCH3)|79132 (DHX58)|84868 (HAVCR2)|148022 (TICAM1)
	M	GO|GO.BP	GO:0002286	T cell activation involved in immune response	2.37148e-10	2.70254e-05	17	602 (BCL3)|942 (CD86)|2207 (FCER1G)|3109 (HLA-DMB)|3383 (ICAM1)|3566 (IL4R)|3683 (ITGAL)|3936 (LCP1)|3958 (LGALS3)|5734 (PTGER4)|5971 (RELB)|6693 (SPN)|6778 (STAT6)|54518 (APBB1IP)|84807 (NFKBID)|84868 (HAVCR2)|114548 (NLRP3)
	M	GO|GO.BP	GO:0051247	positive regulation of protein metabolic process	2.72412e-10	3.10441e-05	82	154 (ADRB2)|409 (ARRB2)|602 (BCL3)|637 (BID)|718 (C3)|728 (C5AR1)|834 (CASP1)|920 (CD4)|942 (CD86)|972 (CD74)|1050 (CEBPA)|1230 (CCR1)|1435 (CSF1)|1436 (CSF1R)|1445 (CSK)|1536 (CYBB)|2185 (PTK2B)|2357 (FPR1)|3059 (HCLS1)|3077 (HFE)|3162 (HMOX1)|3249 (HPN)|3303 (HSPA1A)|3383 (ICAM1)|3570 (IL6R)|3659 (IRF1)|3937 (LCP2)|4057 (LTF)|4067 (LYN)|5045 (FURIN)|5294 (PIK3CG)|5580 (PRKCD)|5585 (PKN1)|5606 (…
	M	GO|GO.BP	GO:0051092	positive regulation of NF-kappaB transcription factor activity	2.87132e-10	3.27215e-05	20	695 (BTK)|3303 (HSPA1A)|3383 (ICAM1)|3689 (ITGB2)|4057 (LTF)|4615 (MYD88)|4791 (NFKB2)|5970 (RELA)|6279 (S100A8)|6280 (S100A9)|7040 (TGFB1)|7097 (TLR2)|7188 (TRAF5)|8792 (TNFRSF11A)|8877 (SPHK1)|9830 (TRIM14)|10333 (TLR6)|84433 (CARD11)|114548 (NLRP3)|148022 (TICAM1)
	M	GO|GO.BP	GO:1903555	regulation of tumor necrosis factor superfamily cytokine production	2.96403e-10	3.37781e-05	19	409 (ARRB2)|602 (BCL3)|929 (CD14)|942 (CD86)|1535 (CYBA)|1536 (CYBB)|2207 (FCER1G)|4057 (LTF)|5724 (PTAFR)|5788 (PTPRC)|6693 (SPN)|7096 (TLR1)|7097 (TLR2)|7128 (TNFAIP3)|7538 (ZFP36)|9261 (MAPKAPK2)|54440 (SASH3)|84868 (HAVCR2)|148022 (TICAM1)
	M	GO|GO.BP	GO:0032418	lysosome localization	3.06324e-10	3.49087e-05	14	695 (BTK)|2207 (FCER1G)|2242 (FES)|2268 (FGR)|3162 (HMOX1)|3566 (IL4R)|4067 (LYN)|5293 (PIK3CD)|5294 (PIK3CG)|5880 (RAC2)|7462 (LAT2)|8673 (VAMP8)|8832 (CD84)|201294 (UNC13D)
	M	GO|GO.BP	GO:0032635	interleukin-6 production	3.38737e-10	3.86025e-05	19	409 (ARRB2)|1051 (CEBPB)|1445 (CSK)|1535 (CYBA)|2207 (FCER1G)|3570 (IL6R)|3635 (INPP5D)|4615 (MYD88)|5724 (PTAFR)|7096 (TLR1)|7097 (TLR2)|7128 (TNFAIP3)|8808 (IL1RL2)|9261 (MAPKAPK2)|10333 (TLR6)|51284 (TLR7)|55024 (BANK1)|84868 (HAVCR2)|148022 (TICAM1)
	M	GO|GO.CC	GO:0031226	intrinsic component of plasma membrane	3.42443e-10	3.90248e-05	82	113 (ADCY7)|140 (ADORA3)|154 (ADRB2)|719 (C3AR1)|728 (C5AR1)|920 (CD4)|923 (CD6)|929 (CD14)|951 (CD37)|963 (CD53)|1230 (CCR1)|1240 (CMKLR1)|1436 (CSF1R)|1439 (CSF2RB)|1441 (CSF3R)|1535 (CYBA)|1536 (CYBB)|2124 (EVI2B)|2185 (PTK2B)|2207 (FCER1G)|2350 (FOLR2)|2687 (GGT5)|2857 (GPR34)|3077 (HFE)|3249 (HPN)|3274 (HRH2)|3383 (ICAM1)|3459 (IFNGR1)|3566 (IL4R)|3570 (IL6R)|3682 (ITGAE)|3683 (ITGAL)|3684 (…
	M	GO|GO.BP	GO:0006935	chemotaxis	3.52989e-10	4.02267e-05	43	409 (ARRB2)|719 (C3AR1)|728 (C5AR1)|972 (CD74)|1230 (CCR1)|1240 (CMKLR1)|1435 (CSF1)|1436 (CSF1R)|1441 (CSF3R)|1794 (DOCK2)|1796 (DOK1)|1960 (EGR3)|2185 (PTK2B)|2207 (FCER1G)|2242 (FES)|2357 (FPR1)|3570 (IL6R)|3603 (IL16)|3689 (ITGB2)|3958 (LGALS3)|4067 (LYN)|5054 (SERPINE1)|5293 (PIK3CD)|5294 (PIK3CG)|5580 (PRKCD)|5641 (LGMN)|5724 (PTAFR)|5880 (RAC2)|6279 (S100A8)|6280 (S100A9)|6347 (CCL2)|6693 …
	M	GO|GO.BP	GO:0050789	regulation of biological process	3.57745e-10	4.07686e-05	348	60 (ACTB)|113 (ADCY7)|140 (ADORA3)|154 (ADRB2)|215 (ABCD1)|388 (RHOB)|393 (ARHGAP4)|409 (ARRB2)|463 (ZFHX3)|467 (ATF3)|598 (BCL2L1)|602 (BCL3)|637 (BID)|694 (BTG1)|695 (BTK)|712 (C1QA)|713 (C1QB)|714 (C1QC)|718 (C3)|719 (C3AR1)|728 (C5AR1)|752 (FMNL1)|834 (CASP1)|920 (CD4)|923 (CD6)|929 (CD14)|933 (CD22)|942 (CD86)|951 (CD37)|963 (CD53)|972 (CD74)|1040 (CDS1)|1050 (CEBPA)|1051 (CEBPB)|1230 (CCR1)…
	M	GO|GO.BP	GO:0002695	negative regulation of leukocyte activation	3.69227e-10	4.20771e-05	21	695 (BTK)|942 (CD86)|972 (CD74)|1051 (CEBPB)|3077 (HFE)|3162 (HMOX1)|3566 (IL4R)|3635 (INPP5D)|3659 (IRF1)|3958 (LGALS3)|4067 (LYN)|5585 (PKN1)|5788 (PTPRC)|6693 (SPN)|7040 (TGFB1)|7128 (TNFAIP3)|8764 (TNFRSF14)|8832 (CD84)|55024 (BANK1)|84807 (NFKBID)|84868 (HAVCR2)
	M	GO|GO.BP	GO:0042330	taxis	3.90089e-10	4.44546e-05	43	409 (ARRB2)|719 (C3AR1)|728 (C5AR1)|972 (CD74)|1230 (CCR1)|1240 (CMKLR1)|1435 (CSF1)|1436 (CSF1R)|1441 (CSF3R)|1794 (DOCK2)|1796 (DOK1)|1960 (EGR3)|2185 (PTK2B)|2207 (FCER1G)|2242 (FES)|2357 (FPR1)|3570 (IL6R)|3603 (IL16)|3689 (ITGB2)|3958 (LGALS3)|4067 (LYN)|5054 (SERPINE1)|5293 (PIK3CD)|5294 (PIK3CG)|5580 (PRKCD)|5641 (LGMN)|5724 (PTAFR)|5880 (RAC2)|6279 (S100A8)|6280 (S100A9)|6347 (CCL2)|6693 …
	M	GO|GO.BP	GO:0006796	phosphate-containing compound metabolic process	3.96449e-10	4.51794e-05	129	60 (ACTB)|113 (ADCY7)|154 (ADRB2)|215 (ABCD1)|409 (ARRB2)|467 (ATF3)|637 (BID)|695 (BTK)|718 (C3)|728 (C5AR1)|920 (CD4)|942 (CD86)|972 (CD74)|1040 (CDS1)|1050 (CEBPA)|1230 (CCR1)|1435 (CSF1)|1436 (CSF1R)|1439 (CSF2RB)|1445 (CSK)|1827 (RCAN1)|1844 (DUSP2)|2027 (ENO3)|2055 (CLN8)|2099 (ESR1)|2185 (PTK2B)|2242 (FES)|2268 (FGR)|2357 (FPR1)|2533 (FYB1)|2872 (MKNK2)|3059 (HCLS1)|3077 (HFE)|3099 (HK2)|3…
	M	GO|GO.CC	GO:0035579	specific granule membrane	4.10087e-10	4.67335e-05	16	719 (C3AR1)|963 (CD53)|1535 (CYBA)|1536 (CYBB)|3683 (ITGAL)|3684 (ITGAM)|3689 (ITGB2)|6793 (STK10)|7133 (TNFRSF1B)|7226 (TRPM2)|8673 (VAMP8)|10555 (AGPAT2)|54918 (CMTM6)|57153 (SLC44A2)|81619 (TSPAN14)|84329 (HVCN1)
	M	GO|GO.CC	GO:0016021	integral component of membrane	4.16332e-10	4.74452e-05	188	113 (ADCY7)|140 (ADORA3)|154 (ADRB2)|215 (ABCD1)|241 (ALOX5AP)|598 (BCL2L1)|637 (BID)|719 (C3AR1)|728 (C5AR1)|920 (CD4)|923 (CD6)|929 (CD14)|933 (CD22)|942 (CD86)|951 (CD37)|963 (CD53)|972 (CD74)|1040 (CDS1)|1230 (CCR1)|1240 (CMKLR1)|1435 (CSF1)|1436 (CSF1R)|1439 (CSF2RB)|1441 (CSF3R)|1535 (CYBA)|1536 (CYBB)|2014 (EMP3)|2055 (CLN8)|2099 (ESR1)|2124 (EVI2B)|2185 (PTK2B)|2207 (FCER1G)|2212 (FCGR2A)…
	M	GO|GO.BP	GO:0002888	positive regulation of myeloid leukocyte mediated immunity	4.68575e-10	5.33988e-05	10	695 (BTK)|718 (C3)|2207 (FCER1G)|2268 (FGR)|3566 (IL4R)|3684 (ITGAM)|3689 (ITGB2)|5724 (PTAFR)|8673 (VAMP8)|148022 (TICAM1)
	M	GO|GO.BP	GO:0043304	regulation of mast cell degranulation	4.68575e-10	5.33988e-05	10	2207 (FCER1G)|2242 (FES)|2268 (FGR)|3162 (HMOX1)|3566 (IL4R)|4067 (LYN)|5880 (RAC2)|8673 (VAMP8)|8832 (CD84)|201294 (UNC13D)
	M	GO|GO.BP	GO:0002460	adaptive immune response based on somatic recombination of immune receptors built from immunoglobulin superfamily domains	4.82163e-10	5.49473e-05	31	602 (BCL3)|695 (BTK)|712 (C1QA)|713 (C1QB)|714 (C1QC)|718 (C3)|920 (CD4)|972 (CD74)|2207 (FCER1G)|3077 (HFE)|3383 (ICAM1)|3566 (IL4R)|3570 (IL6R)|3635 (INPP5D)|4791 (NFKB2)|5452 (POU2F2)|5580 (PRKCD)|5585 (PKN1)|5788 (PTPRC)|5971 (RELB)|6693 (SPN)|6778 (STAT6)|7040 (TGFB1)|7128 (TNFAIP3)|10148 (EBI3)|51279 (C1RL)|54440 (SASH3)|84807 (NFKBID)|84868 (HAVCR2)|114548 (NLRP3)|201294 (UNC13D)
	M	GO|GO.BP	GO:0071706	tumor necrosis factor superfamily cytokine production	5.01817e-10	5.7187e-05	19	409 (ARRB2)|602 (BCL3)|929 (CD14)|942 (CD86)|1535 (CYBA)|1536 (CYBB)|2207 (FCER1G)|4057 (LTF)|5724 (PTAFR)|5788 (PTPRC)|6693 (SPN)|7096 (TLR1)|7097 (TLR2)|7128 (TNFAIP3)|7538 (ZFP36)|9261 (MAPKAPK2)|54440 (SASH3)|84868 (HAVCR2)|148022 (TICAM1)
	M	GO|GO.CC	GO:0031224	intrinsic component of membrane	5.0691e-10	5.77675e-05	192	113 (ADCY7)|140 (ADORA3)|154 (ADRB2)|215 (ABCD1)|241 (ALOX5AP)|598 (BCL2L1)|637 (BID)|719 (C3AR1)|728 (C5AR1)|920 (CD4)|923 (CD6)|929 (CD14)|933 (CD22)|942 (CD86)|951 (CD37)|963 (CD53)|972 (CD74)|1040 (CDS1)|1230 (CCR1)|1240 (CMKLR1)|1435 (CSF1)|1436 (CSF1R)|1439 (CSF2RB)|1441 (CSF3R)|1535 (CYBA)|1536 (CYBB)|2014 (EMP3)|2055 (CLN8)|2099 (ESR1)|2124 (EVI2B)|2185 (PTK2B)|2207 (FCER1G)|2212 (FCGR2A)…
	M	GO|GO.BP	GO:0042116	macrophage activation	5.65664e-10	6.4463e-05	15	972 (CD74)|1050 (CEBPA)|3566 (IL4R)|3684 (ITGAM)|3689 (ITGB2)|5788 (PTPRC)|7096 (TLR1)|7097 (TLR2)|7305 (TYROBP)|10333 (TLR6)|22904 (SBNO2)|51284 (TLR7)|79155 (TNIP2)|84868 (HAVCR2)|148022 (TICAM1)
	M	GO|GO.CC	GO:0060205	cytoplasmic vesicle lumen	6.70486e-10	7.64086e-05	30	718 (C3)|1509 (CTSD)|1522 (CTSZ)|1794 (DOCK2)|2162 (F13A1)|2268 (FGR)|2588 (GALNS)|2799 (GNS)|2896 (GRN)|3101 (HK3)|3959 (LGALS3BP)|4057 (LTF)|4353 (MPO)|4758 (NEU1)|4860 (PNP)|5054 (SERPINE1)|5199 (CFP)|5580 (PRKCD)|5768 (QSOX1)|6279 (S100A8)|6280 (S100A9)|7040 (TGFB1)|8635 (RNASET2)|9535 (GMFG)|10855 (HPSE)|23406 (COTL1)|79792 (GSDMD)|83706 (FERMT3)|201294 (UNC13D)|387921 (NHLRC3)
	M	GO|GO.CC	GO:0009986	cell surface	6.76884e-10	7.71377e-05	52	728 (C5AR1)|920 (CD4)|923 (CD6)|929 (CD14)|933 (CD22)|942 (CD86)|972 (CD74)|1230 (CCR1)|1436 (CSF1R)|1441 (CSF3R)|1522 (CTSZ)|2207 (FCER1G)|2350 (FOLR2)|2683 (B4GALT1)|3077 (HFE)|3249 (HPN)|3383 (ICAM1)|3570 (IL6R)|3682 (ITGAE)|3683 (ITGAL)|3684 (ITGAM)|3687 (ITGAX)|3689 (ITGB2)|3693 (ITGB5)|3956 (LGALS1)|3958 (LGALS3)|4057 (LTF)|4360 (MRC1)|5045 (FURIN)|5788 (PTPRC)|6693 (SPN)|7040 (TGFB1)|7046 …
	M	GO|GO.MF	GO:0003674	molecular_function	6.80693e-10	7.75718e-05	460	35 (ACADS)|60 (ACTB)|113 (ADCY7)|140 (ADORA3)|154 (ADRB2)|162 (AP1B1)|215 (ABCD1)|241 (ALOX5AP)|388 (RHOB)|393 (ARHGAP4)|409 (ARRB2)|463 (ZFHX3)|467 (ATF3)|598 (BCL2L1)|602 (BCL3)|637 (BID)|694 (BTG1)|695 (BTK)|712 (C1QA)|713 (C1QB)|714 (C1QC)|718 (C3)|719 (C3AR1)|728 (C5AR1)|752 (FMNL1)|834 (CASP1)|920 (CD4)|923 (CD6)|929 (CD14)|933 (CD22)|942 (CD86)|951 (CD37)|963 (CD53)|972 (CD74)|1040 (CDS1)|…
	M	GO|GO.BP	GO:0033006	regulation of mast cell activation involved in immune response	7.00092e-10	7.97824e-05	10	2207 (FCER1G)|2242 (FES)|2268 (FGR)|3162 (HMOX1)|3566 (IL4R)|4067 (LYN)|5880 (RAC2)|8673 (VAMP8)|8832 (CD84)|201294 (UNC13D)
	M	GO|GO.BP	GO:0051049	regulation of transport	7.01906e-10	7.99892e-05	85	60 (ACTB)|154 (ADRB2)|409 (ARRB2)|637 (BID)|718 (C3)|834 (CASP1)|920 (CD4)|929 (CD14)|933 (CD22)|972 (CD74)|1051 (CEBPB)|1230 (CCR1)|1436 (CSF1R)|1445 (CSK)|1520 (CTSS)|1535 (CYBA)|1536 (CYBB)|1794 (DOCK2)|2185 (PTK2B)|2207 (FCER1G)|2242 (FES)|2268 (FGR)|3059 (HCLS1)|3077 (HFE)|3099 (HK2)|3162 (HMOX1)|3303 (HSPA1A)|3383 (ICAM1)|3566 (IL4R)|3603 (IL16)|3684 (ITGAM)|3689 (ITGB2)|3936 (LCP1)|3958 (L…
	M	GO|GO.CC	GO:0031983	vesicle lumen	7.19598e-10	8.20054e-05	30	718 (C3)|1509 (CTSD)|1522 (CTSZ)|1794 (DOCK2)|2162 (F13A1)|2268 (FGR)|2588 (GALNS)|2799 (GNS)|2896 (GRN)|3101 (HK3)|3959 (LGALS3BP)|4057 (LTF)|4353 (MPO)|4758 (NEU1)|4860 (PNP)|5054 (SERPINE1)|5199 (CFP)|5580 (PRKCD)|5768 (QSOX1)|6279 (S100A8)|6280 (S100A9)|7040 (TGFB1)|8635 (RNASET2)|9535 (GMFG)|10855 (HPSE)|23406 (COTL1)|79792 (GSDMD)|83706 (FERMT3)|201294 (UNC13D)|387921 (NHLRC3)
	M	GO|GO.CC	GO:0005615	extracellular space	7.80256e-10	8.8918e-05	137	60 (ACTB)|388 (RHOB)|712 (C1QA)|713 (C1QB)|714 (C1QC)|718 (C3)|752 (FMNL1)|929 (CD14)|933 (CD22)|942 (CD86)|951 (CD37)|963 (CD53)|972 (CD74)|1293 (COL6A3)|1435 (CSF1)|1445 (CSK)|1471 (CST3)|1509 (CTSD)|1520 (CTSS)|1522 (CTSZ)|1777 (DNASE2)|1794 (DOCK2)|2027 (ENO3)|2162 (F13A1)|2215 (FCGR3B)|2268 (FGR)|2289 (FKBP5)|2588 (GALNS)|2650 (GCNT1)|2683 (B4GALT1)|2799 (GNS)|2896 (GRN)|3017 (HIST1H2BD)|307…
	M	GO|GO.BP	GO:0070665	positive regulation of leukocyte proliferation	8.3338e-10	9.4972e-05	19	920 (CD4)|923 (CD6)|942 (CD86)|972 (CD74)|1435 (CSF1)|3109 (HLA-DMB)|3570 (IL6R)|4067 (LYN)|4860 (PNP)|5788 (PTPRC)|10148 (EBI3)|11151 (CORO1A)|23308 (ICOSLG)|30835 (CD209)|54440 (SASH3)|64926 (RASAL3)|84433 (CARD11)|84868 (HAVCR2)|148022 (TICAM1)
	M	GO|GO.BP	GO:0051094	positive regulation of developmental process	8.78669e-10	0.000100133	71	154 (ADRB2)|388 (RHOB)|409 (ARRB2)|694 (BTG1)|695 (BTK)|718 (C3)|719 (C3AR1)|728 (C5AR1)|920 (CD4)|942 (CD86)|963 (CD53)|972 (CD74)|1050 (CEBPA)|1051 (CEBPB)|1230 (CCR1)|1240 (CMKLR1)|1435 (CSF1)|1536 (CYBB)|1960 (EGR3)|2124 (EVI2B)|2185 (PTK2B)|2242 (FES)|3059 (HCLS1)|3099 (HK2)|3159 (HMGA1)|3162 (HMOX1)|3249 (HPN)|3303 (HSPA1A)|3566 (IL4R)|3570 (IL6R)|3635 (INPP5D)|3689 (ITGB2)|3726 (JUNB)|4057…
	M	GO|GO.BP	GO:0032268	regulation of cellular protein metabolic process	9.90532e-10	0.000112881	110	60 (ACTB)|154 (ADRB2)|409 (ARRB2)|467 (ATF3)|602 (BCL3)|637 (BID)|718 (C3)|728 (C5AR1)|834 (CASP1)|920 (CD4)|972 (CD74)|1050 (CEBPA)|1230 (CCR1)|1293 (COL6A3)|1435 (CSF1)|1436 (CSF1R)|1445 (CSK)|1471 (CST3)|1522 (CTSZ)|1827 (RCAN1)|1844 (DUSP2)|2055 (CLN8)|2185 (PTK2B)|2268 (FGR)|2357 (FPR1)|2872 (MKNK2)|3059 (HCLS1)|3077 (HFE)|3249 (HPN)|3303 (HSPA1A)|3383 (ICAM1)|3570 (IL6R)|3689 (ITGB2)|3937 (…
	M	GO|GO.BP	GO:0034134	toll-like receptor 2 signaling pathway	1.04613e-09	0.000119217	8	1535 (CYBA)|4067 (LYN)|7096 (TLR1)|7097 (TLR2)|7128 (TNFAIP3)|10333 (TLR6)|79155 (TNIP2)|118788 (PIK3AP1)
	M	GO|GO.BP	GO:0031325	positive regulation of cellular metabolic process	1.10628e-09	0.000126072	129	154 (ADRB2)|215 (ABCD1)|409 (ARRB2)|463 (ZFHX3)|467 (ATF3)|602 (BCL3)|637 (BID)|718 (C3)|728 (C5AR1)|834 (CASP1)|920 (CD4)|942 (CD86)|972 (CD74)|1050 (CEBPA)|1051 (CEBPB)|1230 (CCR1)|1435 (CSF1)|1436 (CSF1R)|1445 (CSK)|1535 (CYBA)|1536 (CYBB)|1820 (ARID3A)|1960 (EGR3)|2000 (ELF4)|2099 (ESR1)|2185 (PTK2B)|2268 (FGR)|2357 (FPR1)|3059 (HCLS1)|3077 (HFE)|3099 (HK2)|3159 (HMGA1)|3162 (HMOX1)|3249 (HPN…
	M	GO|GO.BP	GO:1902107	positive regulation of leukocyte differentiation	1.20472e-09	0.00013729	19	695 (BTK)|920 (CD4)|942 (CD86)|972 (CD74)|1230 (CCR1)|1435 (CSF1)|1960 (EGR3)|2124 (EVI2B)|3059 (HCLS1)|3566 (IL4R)|3635 (INPP5D)|4860 (PNP)|5788 (PTPRC)|7040 (TGFB1)|8808 (IL1RL2)|9308 (CD83)|54440 (SASH3)|84807 (NFKBID)|114548 (NLRP3)
	M	GO|GO.BP	GO:0032680	regulation of tumor necrosis factor production	1.28028e-09	0.000145901	18	409 (ARRB2)|602 (BCL3)|929 (CD14)|1535 (CYBA)|1536 (CYBB)|2207 (FCER1G)|4057 (LTF)|5724 (PTAFR)|5788 (PTPRC)|6693 (SPN)|7096 (TLR1)|7097 (TLR2)|7128 (TNFAIP3)|7538 (ZFP36)|9261 (MAPKAPK2)|54440 (SASH3)|84868 (HAVCR2)|148022 (TICAM1)
	M	GO|GO.BP	GO:0051090	regulation of DNA-binding transcription factor activity	1.30276e-09	0.000148462	33	140 (ADORA3)|409 (ARRB2)|695 (BTK)|1240 (CMKLR1)|2099 (ESR1)|3059 (HCLS1)|3162 (HMOX1)|3303 (HSPA1A)|3383 (ICAM1)|3689 (ITGB2)|4057 (LTF)|4615 (MYD88)|4791 (NFKB2)|4794 (NFKBIE)|5970 (RELA)|6279 (S100A8)|6280 (S100A9)|6446 (SGK1)|7040 (TGFB1)|7097 (TLR2)|7128 (TNFAIP3)|7188 (TRAF5)|7480 (WNT10B)|8792 (TNFRSF11A)|8877 (SPHK1)|9830 (TRIM14)|10333 (TLR6)|84433 (CARD11)|84807 (NFKBID)|84868 (HAVCR2)|…
	M	GO|GO.BP	GO:0032640	tumor necrosis factor production	1.65724e-09	0.000188859	18	409 (ARRB2)|602 (BCL3)|929 (CD14)|1535 (CYBA)|1536 (CYBB)|2207 (FCER1G)|4057 (LTF)|5724 (PTAFR)|5788 (PTPRC)|6693 (SPN)|7096 (TLR1)|7097 (TLR2)|7128 (TNFAIP3)|7538 (ZFP36)|9261 (MAPKAPK2)|54440 (SASH3)|84868 (HAVCR2)|148022 (TICAM1)
	M	GO|GO.BP	GO:0009893	positive regulation of metabolic process	1.66907e-09	0.000190208	137	60 (ACTB)|154 (ADRB2)|215 (ABCD1)|409 (ARRB2)|463 (ZFHX3)|467 (ATF3)|602 (BCL3)|637 (BID)|718 (C3)|728 (C5AR1)|834 (CASP1)|920 (CD4)|942 (CD86)|972 (CD74)|1050 (CEBPA)|1051 (CEBPB)|1230 (CCR1)|1240 (CMKLR1)|1435 (CSF1)|1436 (CSF1R)|1445 (CSK)|1535 (CYBA)|1536 (CYBB)|1820 (ARID3A)|1960 (EGR3)|2000 (ELF4)|2099 (ESR1)|2185 (PTK2B)|2268 (FGR)|2357 (FPR1)|3059 (HCLS1)|3077 (HFE)|3099 (HK2)|3159 (HMGA1…
	M	GO|GO.BP	GO:0050790	regulation of catalytic activity	1.67589e-09	0.000190985	99	60 (ACTB)|140 (ADORA3)|154 (ADRB2)|241 (ALOX5AP)|393 (ARHGAP4)|409 (ARRB2)|637 (BID)|718 (C3)|728 (C5AR1)|834 (CASP1)|920 (CD4)|972 (CD74)|1050 (CEBPA)|1293 (COL6A3)|1435 (CSF1)|1436 (CSF1R)|1445 (CSK)|1471 (CST3)|1535 (CYBA)|1794 (DOCK2)|1827 (RCAN1)|1844 (DUSP2)|2099 (ESR1)|2185 (PTK2B)|2268 (FGR)|2357 (FPR1)|2769 (GNA15)|3303 (HSPA1A)|3383 (ICAM1)|3570 (IL6R)|3684 (ITGAM)|3689 (ITGB2)|3937 (LC…
	M	GO|GO.BP	GO:0002532	production of molecular mediator involved in inflammatory response	2.33042e-09	0.000265575	13	113 (ADCY7)|215 (ABCD1)|695 (BTK)|923 (CD6)|2207 (FCER1G)|3566 (IL4R)|4067 (LYN)|4615 (MYD88)|5054 (SERPINE1)|8673 (VAMP8)|10333 (TLR6)|63940 (GPSM3)|148022 (TICAM1)
	M	GO|GO.CC	GO:0031090	organelle membrane	2.68557e-09	0.000306048	118	154 (ADRB2)|162 (AP1B1)|215 (ABCD1)|241 (ALOX5AP)|388 (RHOB)|598 (BCL2L1)|637 (BID)|719 (C3AR1)|728 (C5AR1)|920 (CD4)|929 (CD14)|963 (CD53)|972 (CD74)|1522 (CTSZ)|1535 (CYBA)|1536 (CYBB)|1844 (DUSP2)|2055 (CLN8)|2207 (FCER1G)|2212 (FCGR2A)|2215 (FCGR3B)|2268 (FGR)|2357 (FPR1)|2650 (GCNT1)|2683 (B4GALT1)|3099 (HK2)|3109 (HLA-DMB)|3111 (HLA-DOA)|3249 (HPN)|3683 (ITGAL)|3684 (ITGAM)|3687 (ITGAX)|368…
	M	GO|GO.CC	GO:0005887	integral component of plasma membrane	2.70681e-09	0.000308468	77	113 (ADCY7)|140 (ADORA3)|154 (ADRB2)|719 (C3AR1)|728 (C5AR1)|920 (CD4)|923 (CD6)|951 (CD37)|963 (CD53)|1230 (CCR1)|1240 (CMKLR1)|1436 (CSF1R)|1439 (CSF2RB)|1441 (CSF3R)|1535 (CYBA)|1536 (CYBB)|2124 (EVI2B)|2185 (PTK2B)|2207 (FCER1G)|2857 (GPR34)|3077 (HFE)|3249 (HPN)|3274 (HRH2)|3383 (ICAM1)|3459 (IFNGR1)|3566 (IL4R)|3570 (IL6R)|3682 (ITGAE)|3683 (ITGAL)|3684 (ITGAM)|3687 (ITGAX)|3689 (ITGB2)|369…
	M	GO|GO.BP	GO:1903557	positive regulation of tumor necrosis factor superfamily cytokine production	2.71818e-09	0.000309763	14	929 (CD14)|942 (CD86)|1535 (CYBA)|1536 (CYBB)|2207 (FCER1G)|5724 (PTAFR)|5788 (PTPRC)|6693 (SPN)|7096 (TLR1)|7097 (TLR2)|9261 (MAPKAPK2)|54440 (SASH3)|84868 (HAVCR2)|148022 (TICAM1)
	M	GO|GO.BP	GO:0032946	positive regulation of mononuclear cell proliferation	2.73602e-09	0.000311797	18	920 (CD4)|923 (CD6)|942 (CD86)|972 (CD74)|1435 (CSF1)|3109 (HLA-DMB)|3570 (IL6R)|4860 (PNP)|5788 (PTPRC)|10148 (EBI3)|11151 (CORO1A)|23308 (ICOSLG)|30835 (CD209)|54440 (SASH3)|64926 (RASAL3)|84433 (CARD11)|84868 (HAVCR2)|148022 (TICAM1)
	M	GO|GO.BP	GO:0016310	phosphorylation	2.78321e-09	0.000317175	99	60 (ACTB)|154 (ADRB2)|215 (ABCD1)|409 (ARRB2)|467 (ATF3)|637 (BID)|695 (BTK)|718 (C3)|728 (C5AR1)|920 (CD4)|942 (CD86)|972 (CD74)|1050 (CEBPA)|1230 (CCR1)|1435 (CSF1)|1436 (CSF1R)|1439 (CSF2RB)|1445 (CSK)|1844 (DUSP2)|2027 (ENO3)|2099 (ESR1)|2185 (PTK2B)|2242 (FES)|2268 (FGR)|2357 (FPR1)|2533 (FYB1)|2872 (MKNK2)|3059 (HCLS1)|3077 (HFE)|3099 (HK2)|3101 (HK3)|3383 (ICAM1)|3570 (IL6R)|3689 (ITGB2)|3…
	M	GO|GO.BP	GO:1903708	positive regulation of hemopoiesis	2.81023e-09	0.000320254	21	695 (BTK)|920 (CD4)|942 (CD86)|972 (CD74)|1230 (CCR1)|1435 (CSF1)|1960 (EGR3)|2124 (EVI2B)|2242 (FES)|3059 (HCLS1)|3303 (HSPA1A)|3566 (IL4R)|3635 (INPP5D)|4860 (PNP)|5788 (PTPRC)|7040 (TGFB1)|8808 (IL1RL2)|9308 (CD83)|54440 (SASH3)|84807 (NFKBID)|114548 (NLRP3)
	M	GO|GO.BP	GO:0051241	negative regulation of multicellular organismal process	2.9449e-09	0.000335601	65	113 (ADCY7)|154 (ADRB2)|215 (ABCD1)|393 (ARHGAP4)|409 (ARRB2)|602 (BCL3)|695 (BTK)|714 (C1QC)|972 (CD74)|1230 (CCR1)|1240 (CMKLR1)|1445 (CSK)|1471 (CST3)|1522 (CTSZ)|1535 (CYBA)|2185 (PTK2B)|3077 (HFE)|3162 (HMOX1)|3249 (HPN)|3566 (IL4R)|3635 (INPP5D)|3659 (IRF1)|3955 (LFNG)|3956 (LGALS1)|4057 (LTF)|4067 (LYN)|4772 (NFATC1)|5045 (FURIN)|5054 (SERPINE1)|5140 (PDE3B)|5176 (SERPINF1)|5294 (PIK3CG)|5…
	M	GO|GO.CC	GO:0098802	plasma membrane receptor complex	3.10345e-09	0.00035367	21	920 (CD4)|923 (CD6)|1439 (CSF2RB)|2185 (PTK2B)|3077 (HFE)|3570 (IL6R)|3682 (ITGAE)|3683 (ITGAL)|3684 (ITGAM)|3687 (ITGAX)|3689 (ITGB2)|3693 (ITGB5)|4067 (LYN)|7046 (TGFBR1)|7096 (TLR1)|7097 (TLR2)|7188 (TRAF5)|10148 (EBI3)|10333 (TLR6)|26090 (ABHD12)|54518 (APBB1IP)
	M	GO|GO.BP	GO:0009653	anatomical structure morphogenesis	3.20272e-09	0.000364982	108	388 (RHOB)|393 (ARHGAP4)|409 (ARRB2)|598 (BCL2L1)|602 (BCL3)|694 (BTG1)|718 (C3)|719 (C3AR1)|728 (C5AR1)|752 (FMNL1)|963 (CD53)|1051 (CEBPB)|1293 (COL6A3)|1435 (CSF1)|1436 (CSF1R)|1441 (CSF3R)|1471 (CST3)|1522 (CTSZ)|1536 (CYBB)|1796 (DOK1)|1960 (EGR3)|2099 (ESR1)|2185 (PTK2B)|2242 (FES)|2268 (FGR)|2650 (GCNT1)|2683 (B4GALT1)|3099 (HK2)|3162 (HMOX1)|3249 (HPN)|3274 (HRH2)|3383 (ICAM1)|3566 (IL4R)…
	M	GO|GO.BP	GO:0042742	defense response to bacterium	3.22316e-09	0.000367311	28	602 (BCL3)|728 (C5AR1)|920 (CD4)|1051 (CEBPB)|1535 (CYBA)|2207 (FCER1G)|2268 (FGR)|3570 (IL6R)|4057 (LTF)|4353 (MPO)|4615 (MYD88)|5054 (SERPINE1)|5199 (CFP)|5580 (PRKCD)|6039 (RNASE6)|6279 (S100A8)|6280 (S100A9)|6693 (SPN)|7097 (TLR2)|7100 (TLR5)|7132 (TNFRSF1A)|8764 (TNFRSF14)|10333 (TLR6)|23166 (STAB1)|79792 (GSDMD)|84868 (HAVCR2)|114548 (NLRP3)|219972 (MPEG1)
	M	GO|GO.MF	GO:0019900	kinase binding	3.32336e-09	0.00037873	45	60 (ACTB)|162 (AP1B1)|388 (RHOB)|409 (ARRB2)|598 (BCL2L1)|694 (BTG1)|834 (CASP1)|920 (CD4)|1050 (CEBPA)|1051 (CEBPB)|1445 (CSK)|1844 (DUSP2)|2099 (ESR1)|2185 (PTK2B)|2268 (FGR)|3059 (HCLS1)|3689 (ITGB2)|4772 (NFATC1)|5140 (PDE3B)|5341 (PLEK)|5580 (PRKCD)|5585 (PKN1)|5606 (MAP2K3)|5724 (PTAFR)|5770 (PTPN1)|5788 (PTPRC)|5829 (PXN)|5970 (RELA)|5971 (RELB)|7128 (TNFAIP3)|7444 (VRK2)|7538 (ZFP36)|7867…
	M	GO|GO.CC	GO:0101002	ficolin-1-rich granule	3.42488e-09	0.0003903	21	1471 (CST3)|1509 (CTSD)|1520 (CTSS)|1522 (CTSZ)|2207 (FCER1G)|2357 (FPR1)|2799 (GNS)|3101 (HK3)|3303 (HSPA1A)|3687 (ITGAX)|3689 (ITGB2)|3958 (LGALS3)|4860 (PNP)|7226 (TRPM2)|9535 (GMFG)|10312 (TCIRG1)|23218 (NBEAL2)|23406 (COTL1)|79792 (GSDMD)|79930 (DOK3)|80301 (PLEKHO2)
	M	GO|GO.BP	GO:0034121	regulation of toll-like receptor signaling pathway	3.50072e-09	0.000398942	13	409 (ARRB2)|929 (CD14)|1535 (CYBA)|2099 (ESR1)|3659 (IRF1)|4057 (LTF)|4067 (LYN)|7096 (TLR1)|7097 (TLR2)|7100 (TLR5)|7128 (TNFAIP3)|10333 (TLR6)|148022 (TICAM1)
	M	GO|GO.BP	GO:0016477	cell migration	4.15907e-09	0.000473968	74	140 (ADORA3)|388 (RHOB)|393 (ARHGAP4)|409 (ARRB2)|694 (BTG1)|719 (C3AR1)|728 (C5AR1)|752 (FMNL1)|972 (CD74)|1230 (CCR1)|1240 (CMKLR1)|1435 (CSF1)|1436 (CSF1R)|1441 (CSF3R)|1960 (EGR3)|2185 (PTK2B)|2207 (FCER1G)|2268 (FGR)|2650 (GCNT1)|2683 (B4GALT1)|3162 (HMOX1)|3383 (ICAM1)|3570 (IL6R)|3603 (IL16)|3635 (INPP5D)|3683 (ITGAL)|3684 (ITGAM)|3687 (ITGAX)|3689 (ITGB2)|3693 (ITGB5)|3936 (LCP1)|3958 (LG…
	M	GO|GO.CC	GO:0044421	extracellular region part	4.30902e-09	0.000491056	140	60 (ACTB)|388 (RHOB)|712 (C1QA)|713 (C1QB)|714 (C1QC)|718 (C3)|752 (FMNL1)|929 (CD14)|933 (CD22)|942 (CD86)|951 (CD37)|963 (CD53)|972 (CD74)|1293 (COL6A3)|1435 (CSF1)|1445 (CSK)|1471 (CST3)|1509 (CTSD)|1520 (CTSS)|1522 (CTSZ)|1777 (DNASE2)|1794 (DOCK2)|2027 (ENO3)|2162 (F13A1)|2215 (FCGR3B)|2268 (FGR)|2289 (FKBP5)|2588 (GALNS)|2650 (GCNT1)|2683 (B4GALT1)|2799 (GNS)|2896 (GRN)|3017 (HIST1H2BD)|307…
	M	GO|GO.BP	GO:0051250	negative regulation of lymphocyte activation	4.43346e-09	0.000505238	18	695 (BTK)|942 (CD86)|972 (CD74)|1051 (CEBPB)|3077 (HFE)|3566 (IL4R)|3635 (INPP5D)|3659 (IRF1)|3958 (LGALS3)|4067 (LYN)|5585 (PKN1)|6693 (SPN)|7040 (TGFB1)|7128 (TNFAIP3)|8764 (TNFRSF14)|55024 (BANK1)|84807 (NFKBID)|84868 (HAVCR2)
	M	GO|GO.BP	GO:0006468	protein phosphorylation	4.62382e-09	0.00052693	86	60 (ACTB)|154 (ADRB2)|409 (ARRB2)|467 (ATF3)|695 (BTK)|718 (C3)|728 (C5AR1)|920 (CD4)|972 (CD74)|1050 (CEBPA)|1230 (CCR1)|1435 (CSF1)|1436 (CSF1R)|1439 (CSF2RB)|1445 (CSK)|1844 (DUSP2)|2185 (PTK2B)|2242 (FES)|2268 (FGR)|2357 (FPR1)|2533 (FYB1)|2872 (MKNK2)|3059 (HCLS1)|3077 (HFE)|3383 (ICAM1)|3570 (IL6R)|3689 (ITGB2)|3937 (LCP2)|4057 (LTF)|4067 (LYN)|5293 (PIK3CD)|5294 (PIK3CG)|5580 (PRKCD)|5585 …
	M	GO|GO.BP	GO:0002291	T cell activation via T cell receptor contact with antigen bound to MHC molecule on antigen presenting cell	4.69881e-09	0.000535476	6	3109 (HLA-DMB)|3383 (ICAM1)|3683 (ITGAL)|3958 (LGALS3)|54518 (APBB1IP)|84868 (HAVCR2)
	M	GO|GO.BP	GO:0043122	regulation of I-kappaB kinase/NF-kappaB signaling	5.17834e-09	0.000590124	23	834 (CASP1)|920 (CD4)|972 (CD74)|2099 (ESR1)|3162 (HMOX1)|3956 (LGALS1)|4057 (LTF)|4615 (MYD88)|5970 (RELA)|7052 (TGM2)|7128 (TNFAIP3)|7132 (TNFRSF1A)|7188 (TRAF5)|9020 (MAP3K14)|10333 (TLR6)|10783 (NEK6)|23636 (NUP62)|57153 (SLC44A2)|79155 (TNIP2)|84433 (CARD11)|84807 (NFKBID)|148022 (TICAM1)|222643 (UNC5CL)
	M	GO|GO.BP	GO:0009611	response to wounding	6.15041e-09	0.000700901	42	60 (ACTB)|140 (ADORA3)|409 (ARRB2)|1230 (CCR1)|2027 (ENO3)|2162 (F13A1)|2207 (FCER1G)|2683 (B4GALT1)|2769 (GNA15)|3162 (HMOX1)|3659 (IRF1)|3937 (LCP2)|3956 (LGALS1)|4067 (LYN)|4548 (MTR)|4814 (NINJ1)|5054 (SERPINE1)|5293 (PIK3CD)|5294 (PIK3CG)|5336 (PLCG2)|5341 (PLEK)|5580 (PRKCD)|6279 (S100A8)|6665 (SOX15)|6696 (SPP1)|7040 (TGFB1)|7046 (TGFBR1)|7094 (TLN1)|7128 (TNFAIP3)|7409 (VAV1)|7480 (WNT10B…
	M	GO|GO.BP	GO:0010604	positive regulation of macromolecule metabolic process	8.73017e-09	0.00099489	127	60 (ACTB)|154 (ADRB2)|409 (ARRB2)|463 (ZFHX3)|467 (ATF3)|602 (BCL3)|637 (BID)|718 (C3)|728 (C5AR1)|834 (CASP1)|920 (CD4)|942 (CD86)|972 (CD74)|1050 (CEBPA)|1051 (CEBPB)|1230 (CCR1)|1435 (CSF1)|1436 (CSF1R)|1445 (CSK)|1536 (CYBB)|1820 (ARID3A)|1960 (EGR3)|2000 (ELF4)|2099 (ESR1)|2185 (PTK2B)|2357 (FPR1)|3059 (HCLS1)|3077 (HFE)|3159 (HMGA1)|3162 (HMOX1)|3249 (HPN)|3303 (HSPA1A)|3383 (ICAM1)|3570 (I…
	M	GO|GO.BP	GO:0008284	positive regulation of cell proliferation	8.92661e-09	0.00101728	53	467 (ATF3)|598 (BCL2L1)|728 (C5AR1)|920 (CD4)|923 (CD6)|942 (CD86)|972 (CD74)|1435 (CSF1)|1436 (CSF1R)|1522 (CTSZ)|1535 (CYBA)|1960 (EGR3)|2099 (ESR1)|2185 (PTK2B)|2350 (FOLR2)|2683 (B4GALT1)|3059 (HCLS1)|3109 (HLA-DMB)|3162 (HMOX1)|3249 (HPN)|3570 (IL6R)|4057 (LTF)|4067 (LYN)|4860 (PNP)|5641 (LGMN)|5724 (PTAFR)|5788 (PTPRC)|5880 (RAC2)|5970 (RELA)|6468 (FBXW4)|6665 (SOX15)|7040 (TGFB1)|7046 (TGF…
	M	GO|GO.BP	GO:0006629	lipid metabolic process	9.06708e-09	0.00103328	69	35 (ACADS)|215 (ABCD1)|718 (C3)|942 (CD86)|972 (CD74)|1040 (CDS1)|1050 (CEBPA)|1436 (CSF1R)|2055 (CLN8)|2099 (ESR1)|2185 (PTK2B)|2268 (FGR)|2687 (GGT5)|3073 (HEXA)|3292 (HSD17B1)|3635 (INPP5D)|4067 (LYN)|4758 (NEU1)|5140 (PDE3B)|5293 (PIK3CD)|5294 (PIK3CG)|5326 (PLAGL2)|5330 (PLCB2)|5336 (PLCG2)|5341 (PLEK)|5580 (PRKCD)|5641 (LGMN)|6256 (RXRA)|6696 (SPP1)|6916 (TBXAS1)|7040 (TGFB1)|7132 (TNFRSF1A…
	M	GO|GO.BP	GO:0048870	cell motility	9.09913e-09	0.00103694	78	60 (ACTB)|140 (ADORA3)|388 (RHOB)|393 (ARHGAP4)|409 (ARRB2)|694 (BTG1)|719 (C3AR1)|728 (C5AR1)|752 (FMNL1)|972 (CD74)|1230 (CCR1)|1240 (CMKLR1)|1435 (CSF1)|1436 (CSF1R)|1441 (CSF3R)|1960 (EGR3)|2185 (PTK2B)|2207 (FCER1G)|2242 (FES)|2268 (FGR)|2650 (GCNT1)|2683 (B4GALT1)|3162 (HMOX1)|3383 (ICAM1)|3570 (IL6R)|3603 (IL16)|3635 (INPP5D)|3683 (ITGAL)|3684 (ITGAM)|3687 (ITGAX)|3689 (ITGB2)|3693 (ITGB5)…
	M	GO|GO.BP	GO:0051674	localization of cell	9.09913e-09	0.00103694	78	60 (ACTB)|140 (ADORA3)|388 (RHOB)|393 (ARHGAP4)|409 (ARRB2)|694 (BTG1)|719 (C3AR1)|728 (C5AR1)|752 (FMNL1)|972 (CD74)|1230 (CCR1)|1240 (CMKLR1)|1435 (CSF1)|1436 (CSF1R)|1441 (CSF3R)|1960 (EGR3)|2185 (PTK2B)|2207 (FCER1G)|2242 (FES)|2268 (FGR)|2650 (GCNT1)|2683 (B4GALT1)|3162 (HMOX1)|3383 (ICAM1)|3570 (IL6R)|3603 (IL16)|3635 (INPP5D)|3683 (ITGAL)|3684 (ITGAM)|3687 (ITGAX)|3689 (ITGB2)|3693 (ITGB5)…
	M	GO|GO.BP	GO:0042102	positive regulation of T cell proliferation	9.11148e-09	0.00103834	15	920 (CD4)|923 (CD6)|942 (CD86)|3109 (HLA-DMB)|3570 (IL6R)|4860 (PNP)|5788 (PTPRC)|10148 (EBI3)|11151 (CORO1A)|23308 (ICOSLG)|30835 (CD209)|54440 (SASH3)|64926 (RASAL3)|84433 (CARD11)|84868 (HAVCR2)
	M	GO|GO.BP	GO:0040011	locomotion	9.74117e-09	0.0011101	85	60 (ACTB)|140 (ADORA3)|388 (RHOB)|393 (ARHGAP4)|409 (ARRB2)|694 (BTG1)|719 (C3AR1)|728 (C5AR1)|752 (FMNL1)|972 (CD74)|1230 (CCR1)|1240 (CMKLR1)|1435 (CSF1)|1436 (CSF1R)|1441 (CSF3R)|1794 (DOCK2)|1796 (DOK1)|1960 (EGR3)|2185 (PTK2B)|2207 (FCER1G)|2242 (FES)|2268 (FGR)|2357 (FPR1)|2650 (GCNT1)|2683 (B4GALT1)|3162 (HMOX1)|3383 (ICAM1)|3570 (IL6R)|3603 (IL16)|3635 (INPP5D)|3683 (ITGAL)|3684 (ITGAM)|3…
	M	GO|GO.BP	GO:0043085	positive regulation of catalytic activity	1.09944e-08	0.00125292	68	154 (ADRB2)|241 (ALOX5AP)|393 (ARHGAP4)|637 (BID)|728 (C5AR1)|834 (CASP1)|920 (CD4)|972 (CD74)|1435 (CSF1)|1436 (CSF1R)|1445 (CSK)|1535 (CYBA)|1794 (DOCK2)|2099 (ESR1)|2185 (PTK2B)|2268 (FGR)|2357 (FPR1)|2769 (GNA15)|3303 (HSPA1A)|3383 (ICAM1)|3570 (IL6R)|3684 (ITGAM)|3689 (ITGB2)|3937 (LCP2)|4057 (LTF)|4067 (LYN)|4688 (NCF2)|4689 (NCF4)|5294 (PIK3CG)|5330 (PLCB2)|5341 (PLEK)|5580 (PRKCD)|5585 (P…
	M	GO|GO.BP	GO:0051091	positive regulation of DNA-binding transcription factor activity	1.12881e-08	0.00128639	24	695 (BTK)|2099 (ESR1)|3059 (HCLS1)|3303 (HSPA1A)|3383 (ICAM1)|3689 (ITGB2)|4057 (LTF)|4615 (MYD88)|4791 (NFKB2)|5970 (RELA)|6279 (S100A8)|6280 (S100A9)|7040 (TGFB1)|7097 (TLR2)|7188 (TRAF5)|7480 (WNT10B)|8792 (TNFRSF11A)|8877 (SPHK1)|9830 (TRIM14)|10333 (TLR6)|84433 (CARD11)|114548 (NLRP3)|148022 (TICAM1)|150372 (NFAM1)
	M	GO|GO.BP	GO:0051173	positive regulation of nitrogen compound metabolic process	1.12924e-08	0.00128688	122	154 (ADRB2)|409 (ARRB2)|463 (ZFHX3)|467 (ATF3)|602 (BCL3)|637 (BID)|718 (C3)|728 (C5AR1)|834 (CASP1)|920 (CD4)|942 (CD86)|972 (CD74)|1050 (CEBPA)|1051 (CEBPB)|1230 (CCR1)|1435 (CSF1)|1436 (CSF1R)|1445 (CSK)|1536 (CYBB)|1820 (ARID3A)|1960 (EGR3)|2000 (ELF4)|2099 (ESR1)|2185 (PTK2B)|2357 (FPR1)|3059 (HCLS1)|3077 (HFE)|3159 (HMGA1)|3162 (HMOX1)|3249 (HPN)|3303 (HSPA1A)|3383 (ICAM1)|3570 (IL6R)|3659 …
	M	GO|GO.BP	GO:0007229	integrin-mediated signaling pathway	1.21395e-08	0.00138341	15	2185 (PTK2B)|2207 (FCER1G)|2268 (FGR)|2533 (FYB1)|3682 (ITGAE)|3683 (ITGAL)|3684 (ITGAM)|3687 (ITGAX)|3689 (ITGB2)|3693 (ITGB5)|5341 (PLEK)|7094 (TLN1)|7305 (TYROBP)|7409 (VAV1)|83706 (FERMT3)
	M	GO|GO.BP	GO:0043123	positive regulation of I-kappaB kinase/NF-kappaB signaling	1.28922e-08	0.0014692	20	834 (CASP1)|920 (CD4)|972 (CD74)|3162 (HMOX1)|3956 (LGALS1)|4057 (LTF)|4615 (MYD88)|5970 (RELA)|7052 (TGM2)|7132 (TNFRSF1A)|7188 (TRAF5)|9020 (MAP3K14)|10333 (TLR6)|10783 (NEK6)|23636 (NUP62)|57153 (SLC44A2)|79155 (TNIP2)|84433 (CARD11)|148022 (TICAM1)|222643 (UNC5CL)
	M	GO|GO.BP	GO:1901564	organonitrogen compound metabolic process	1.29753e-08	0.00147866	223	60 (ACTB)|113 (ADCY7)|154 (ADRB2)|215 (ABCD1)|409 (ARRB2)|467 (ATF3)|602 (BCL3)|637 (BID)|695 (BTK)|712 (C1QA)|713 (C1QB)|714 (C1QC)|718 (C3)|719 (C3AR1)|728 (C5AR1)|834 (CASP1)|920 (CD4)|942 (CD86)|972 (CD74)|1040 (CDS1)|1050 (CEBPA)|1051 (CEBPB)|1230 (CCR1)|1293 (COL6A3)|1435 (CSF1)|1436 (CSF1R)|1439 (CSF2RB)|1445 (CSK)|1471 (CST3)|1509 (CTSD)|1520 (CTSS)|1522 (CTSZ)|1536 (CYBB)|1827 (RCAN1)|18…
	M	GO|GO.BP	GO:0002705	positive regulation of leukocyte mediated immunity	1.44196e-08	0.00164326	17	695 (BTK)|718 (C3)|2207 (FCER1G)|2268 (FGR)|3077 (HFE)|3566 (IL4R)|3684 (ITGAM)|3689 (ITGB2)|5724 (PTAFR)|5788 (PTPRC)|6778 (STAT6)|7040 (TGFB1)|7409 (VAV1)|8673 (VAMP8)|54440 (SASH3)|114548 (NLRP3)|148022 (TICAM1)
	M	GO|GO.BP	GO:0032760	positive regulation of tumor necrosis factor production	1.5469e-08	0.00176285	13	929 (CD14)|1535 (CYBA)|1536 (CYBB)|2207 (FCER1G)|5724 (PTAFR)|5788 (PTPRC)|6693 (SPN)|7096 (TLR1)|7097 (TLR2)|9261 (MAPKAPK2)|54440 (SASH3)|84868 (HAVCR2)|148022 (TICAM1)
	M	GO|GO.BP	GO:0050671	positive regulation of lymphocyte proliferation	1.61937e-08	0.00184544	17	920 (CD4)|923 (CD6)|942 (CD86)|972 (CD74)|3109 (HLA-DMB)|3570 (IL6R)|4860 (PNP)|5788 (PTPRC)|10148 (EBI3)|11151 (CORO1A)|23308 (ICOSLG)|30835 (CD209)|54440 (SASH3)|64926 (RASAL3)|84433 (CARD11)|84868 (HAVCR2)|148022 (TICAM1)
	M	GO|GO.CC	GO:0005765	lysosomal membrane	1.68561e-08	0.00192092	28	162 (AP1B1)|215 (ABCD1)|719 (C3AR1)|972 (CD74)|2357 (FPR1)|2683 (B4GALT1)|3109 (HLA-DMB)|3111 (HLA-DOA)|4758 (NEU1)|7107 (GPR137B)|7226 (TRPM2)|7805 (LAPTM5)|8673 (VAMP8)|9145 (SYNGR1)|10312 (TCIRG1)|10855 (HPSE)|11010 (GLIPR1)|51284 (TLR7)|51296 (SLC15A3)|54918 (CMTM6)|55315 (SLC29A3)|57153 (SLC44A2)|57521 (RPTOR)|57617 (VPS18)|124997 (WDR81)|150372 (NFAM1)|221955 (DAGLB)|375775 (PNPLA7)
	M	GO|GO.BP	GO:0045597	positive regulation of cell differentiation	1.72621e-08	0.00196719	53	409 (ARRB2)|694 (BTG1)|695 (BTK)|920 (CD4)|942 (CD86)|963 (CD53)|972 (CD74)|1050 (CEBPA)|1051 (CEBPB)|1230 (CCR1)|1240 (CMKLR1)|1435 (CSF1)|1960 (EGR3)|2124 (EVI2B)|2185 (PTK2B)|2242 (FES)|3059 (HCLS1)|3303 (HSPA1A)|3566 (IL4R)|3570 (IL6R)|3635 (INPP5D)|3726 (JUNB)|4057 (LTF)|4067 (LYN)|4481 (MSR1)|4860 (PNP)|5054 (SERPINE1)|5176 (SERPINF1)|5788 (PTPRC)|5970 (RELA)|6195 (RPS6KA1)|6280 (S100A9)|70…
	M	GO|GO.CC	GO:0098852	lytic vacuole membrane	1.79462e-08	0.00204514	28	162 (AP1B1)|215 (ABCD1)|719 (C3AR1)|972 (CD74)|2357 (FPR1)|2683 (B4GALT1)|3109 (HLA-DMB)|3111 (HLA-DOA)|4758 (NEU1)|7107 (GPR137B)|7226 (TRPM2)|7805 (LAPTM5)|8673 (VAMP8)|9145 (SYNGR1)|10312 (TCIRG1)|10855 (HPSE)|11010 (GLIPR1)|51284 (TLR7)|51296 (SLC15A3)|54918 (CMTM6)|55315 (SLC29A3)|57153 (SLC44A2)|57521 (RPTOR)|57617 (VPS18)|124997 (WDR81)|150372 (NFAM1)|221955 (DAGLB)|375775 (PNPLA7)
	M	GO|GO.BP	GO:0033003	regulation of mast cell activation	1.79533e-08	0.00204596	10	2207 (FCER1G)|2242 (FES)|2268 (FGR)|3162 (HMOX1)|3566 (IL4R)|4067 (LYN)|5880 (RAC2)|8673 (VAMP8)|8832 (CD84)|201294 (UNC13D)
	M	GO|GO.BP	GO:2000026	regulation of multicellular organismal development	1.86306e-08	0.00212315	89	154 (ADRB2)|388 (RHOB)|393 (ARHGAP4)|409 (ARRB2)|463 (ZFHX3)|694 (BTG1)|695 (BTK)|714 (C1QC)|718 (C3)|719 (C3AR1)|728 (C5AR1)|920 (CD4)|942 (CD86)|972 (CD74)|1051 (CEBPB)|1230 (CCR1)|1435 (CSF1)|1441 (CSF3R)|1522 (CTSZ)|1536 (CYBB)|1960 (EGR3)|2099 (ESR1)|2124 (EVI2B)|2185 (PTK2B)|2242 (FES)|3059 (HCLS1)|3099 (HK2)|3111 (HLA-DOA)|3162 (HMOX1)|3249 (HPN)|3303 (HSPA1A)|3566 (IL4R)|3635 (INPP5D)|365…
	M	GO|GO.BP	GO:0018212	peptidyl-tyrosine modification	1.87679e-08	0.00213879	30	409 (ARRB2)|695 (BTK)|920 (CD4)|972 (CD74)|1436 (CSF1R)|1439 (CSF2RB)|1445 (CSK)|2185 (PTK2B)|2242 (FES)|2268 (FGR)|3059 (HCLS1)|3383 (ICAM1)|3570 (IL6R)|3689 (ITGB2)|4067 (LYN)|5580 (PRKCD)|5606 (MAP2K3)|5770 (PTPN1)|5788 (PTPRC)|6503 (SLA)|7040 (TGFB1)|7132 (TNFRSF1A)|8459 (TPST2)|8764 (TNFRSF14)|8798 (DYRK4)|9021 (SOCS3)|9148 (NEURL1)|30844 (EHD4)|54209 (TREM2)|55024 (BANK1)
	M	GO|GO.BP	GO:0097530	granulocyte migration	2.03562e-08	0.00231979	17	719 (C3AR1)|728 (C5AR1)|972 (CD74)|1240 (CMKLR1)|1435 (CSF1)|1441 (CSF3R)|2207 (FCER1G)|3689 (ITGB2)|3958 (LGALS3)|5293 (PIK3CD)|5294 (PIK3CG)|5734 (PTGER4)|5880 (RAC2)|6279 (S100A8)|6280 (S100A9)|6347 (CCL2)|7409 (VAV1)
	M	GO|GO.MF	GO:0019899	enzyme binding	2.10634e-08	0.00240039	95	60 (ACTB)|154 (ADRB2)|162 (AP1B1)|215 (ABCD1)|388 (RHOB)|393 (ARHGAP4)|409 (ARRB2)|463 (ZFHX3)|598 (BCL2L1)|637 (BID)|694 (BTG1)|752 (FMNL1)|834 (CASP1)|920 (CD4)|933 (CD22)|972 (CD74)|1050 (CEBPA)|1051 (CEBPB)|1436 (CSF1R)|1439 (CSF2RB)|1445 (CSK)|1471 (CST3)|1794 (DOCK2)|1844 (DUSP2)|2099 (ESR1)|2185 (PTK2B)|2268 (FGR)|3059 (HCLS1)|3159 (HMGA1)|3162 (HMOX1)|3303 (HSPA1A)|3570 (IL6R)|3689 (ITGB2…
	M	GO|GO.BP	GO:0071621	granulocyte chemotaxis	2.59698e-08	0.00295952	16	719 (C3AR1)|728 (C5AR1)|972 (CD74)|1240 (CMKLR1)|1435 (CSF1)|1441 (CSF3R)|2207 (FCER1G)|3689 (ITGB2)|3958 (LGALS3)|5293 (PIK3CD)|5294 (PIK3CG)|5880 (RAC2)|6279 (S100A8)|6280 (S100A9)|6347 (CCL2)|7409 (VAV1)
	M	GO|GO.CC	GO:0005775	vacuolar lumen	2.72268e-08	0.00310277	19	718 (C3)|972 (CD74)|1509 (CTSD)|1520 (CTSS)|2588 (GALNS)|2799 (GNS)|2896 (GRN)|3073 (HEXA)|4353 (MPO)|4669 (NAGLU)|4758 (NEU1)|5580 (PRKCD)|5641 (LGMN)|6948 (TCN2)|8635 (RNASET2)|10855 (HPSE)|23324 (MAN2B2)|201294 (UNC13D)|387921 (NHLRC3)
	M	GO|GO.BP	GO:0046634	regulation of alpha-beta T cell activation	3.05118e-08	0.00347712	14	942 (CD86)|3077 (HFE)|3566 (IL4R)|3570 (IL6R)|3659 (IRF1)|4860 (PNP)|5788 (PTPRC)|8764 (TNFRSF14)|9308 (CD83)|10148 (EBI3)|54440 (SASH3)|64926 (RASAL3)|84807 (NFKBID)|114548 (NLRP3)
	M	GO|GO.BP	GO:0033993	response to lipid	3.11411e-08	0.00354884	50	409 (ARRB2)|728 (C5AR1)|834 (CASP1)|920 (CD4)|923 (CD6)|929 (CD14)|942 (CD86)|1051 (CEBPB)|1439 (CSF2RB)|1535 (CYBA)|1536 (CYBB)|2099 (ESR1)|2185 (PTK2B)|3383 (ICAM1)|3587 (IL10RA)|3726 (JUNB)|4057 (LTF)|4067 (LYN)|4353 (MPO)|4360 (MRC1)|4791 (NFKB2)|4793 (NFKBIB)|5054 (SERPINE1)|5176 (SERPINF1)|5336 (PLCG2)|5724 (PTAFR)|5734 (PTGER4)|5970 (RELA)|6256 (RXRA)|6279 (S100A8)|6347 (CCL2)|6696 (SPP1)|…
	M	GO|GO.CC	GO:0005766	primary lysosome	3.1776e-08	0.00362119	18	718 (C3)|719 (C3AR1)|2357 (FPR1)|2588 (GALNS)|2683 (B4GALT1)|2799 (GNS)|2896 (GRN)|3073 (HEXA)|4353 (MPO)|5580 (PRKCD)|8635 (RNASET2)|8673 (VAMP8)|9145 (SYNGR1)|11010 (GLIPR1)|54918 (CMTM6)|150372 (NFAM1)|201294 (UNC13D)|387921 (NHLRC3)
	M	GO|GO.CC	GO:0042582	azurophil granule	3.1776e-08	0.00362119	18	718 (C3)|719 (C3AR1)|2357 (FPR1)|2588 (GALNS)|2683 (B4GALT1)|2799 (GNS)|2896 (GRN)|3073 (HEXA)|4353 (MPO)|5580 (PRKCD)|8635 (RNASET2)|8673 (VAMP8)|9145 (SYNGR1)|11010 (GLIPR1)|54918 (CMTM6)|150372 (NFAM1)|201294 (UNC13D)|387921 (NHLRC3)
	M	GO|GO.BP	GO:0002335	mature B cell differentiation	3.44185e-08	0.00392233	8	602 (BCL3)|2185 (PTK2B)|3955 (LFNG)|3956 (LGALS1)|5336 (PLCG2)|5452 (POU2F2)|23228 (PLCL2)|112616 (CMTM7)
	M	GO|GO.BP	GO:0002526	acute inflammatory response	3.56157e-08	0.00405877	21	695 (BTK)|712 (C1QA)|713 (C1QB)|714 (C1QC)|718 (C3)|719 (C3AR1)|728 (C5AR1)|923 (CD6)|1051 (CEBPB)|2207 (FCER1G)|2683 (B4GALT1)|3077 (HFE)|3383 (ICAM1)|3570 (IL6R)|5199 (CFP)|5294 (PIK3CG)|6279 (S100A8)|8792 (TNFRSF11A)|9332 (CD163)|26471 (NUPR1)|114548 (NLRP3)
	M	GO|GO.BP	GO:0032481	positive regulation of type I interferon production	3.64173e-08	0.00415012	12	929 (CD14)|3659 (IRF1)|3663 (IRF5)|4615 (MYD88)|4791 (NFKB2)|5336 (PLCG2)|5970 (RELA)|6778 (STAT6)|7097 (TLR2)|51284 (TLR7)|79132 (DHX58)|148022 (TICAM1)
	M	GO|GO.BP	GO:0002819	regulation of adaptive immune response	3.88368e-08	0.00442584	18	113 (ADCY7)|695 (BTK)|718 (C3)|920 (CD4)|2207 (FCER1G)|3077 (HFE)|3566 (IL4R)|3570 (IL6R)|3659 (IRF1)|5585 (PKN1)|5788 (PTPRC)|6778 (STAT6)|7040 (TGFB1)|7128 (TNFAIP3)|54440 (SASH3)|84807 (NFKBID)|84868 (HAVCR2)|114548 (NLRP3)
	M	GO|GO.BP	GO:0071675	regulation of mononuclear cell migration	3.89807e-08	0.00444224	10	719 (C3AR1)|728 (C5AR1)|1230 (CCR1)|1240 (CMKLR1)|1435 (CSF1)|3958 (LGALS3)|4067 (LYN)|5054 (SERPINE1)|5641 (LGMN)|7040 (TGFB1)
	M	GO|GO.CC	GO:0005576	extracellular region	3.934e-08	0.00448319	159	60 (ACTB)|388 (RHOB)|712 (C1QA)|713 (C1QB)|714 (C1QC)|718 (C3)|752 (FMNL1)|923 (CD6)|929 (CD14)|933 (CD22)|942 (CD86)|951 (CD37)|963 (CD53)|972 (CD74)|1293 (COL6A3)|1435 (CSF1)|1441 (CSF3R)|1445 (CSK)|1471 (CST3)|1509 (CTSD)|1520 (CTSS)|1522 (CTSZ)|1777 (DNASE2)|1794 (DOCK2)|2027 (ENO3)|2162 (F13A1)|2215 (FCGR3B)|2268 (FGR)|2289 (FKBP5)|2350 (FOLR2)|2588 (GALNS)|2650 (GCNT1)|2683 (B4GALT1)|2799 (…
	M	GO|GO.BP	GO:0060627	regulation of vesicle-mediated transport	4.05562e-08	0.00462179	34	409 (ARRB2)|718 (C3)|929 (CD14)|933 (CD22)|1445 (CSK)|1535 (CYBA)|1794 (DOCK2)|2207 (FCER1G)|2242 (FES)|2268 (FGR)|3077 (HFE)|3162 (HMOX1)|3566 (IL4R)|3684 (ITGAM)|3689 (ITGB2)|3958 (LGALS3)|4067 (LYN)|5054 (SERPINE1)|5336 (PLCG2)|5724 (PTAFR)|5770 (PTPN1)|5788 (PTPRC)|5880 (RAC2)|6347 (CCL2)|7040 (TGFB1)|7097 (TLR2)|8673 (VAMP8)|8832 (CD84)|11151 (CORO1A)|29904 (EEF2K)|30844 (EHD4)|55647 (RAB20)…
	M	GO|GO.BP	GO:0045621	positive regulation of lymphocyte differentiation	4.6645e-08	0.00531566	14	695 (BTK)|942 (CD86)|972 (CD74)|1960 (EGR3)|3566 (IL4R)|3635 (INPP5D)|4860 (PNP)|5788 (PTPRC)|7040 (TGFB1)|8808 (IL1RL2)|9308 (CD83)|54440 (SASH3)|84807 (NFKBID)|114548 (NLRP3)
	M	GO|GO.BP	GO:0031399	regulation of protein modification process	5.1608e-08	0.00588125	80	60 (ACTB)|154 (ADRB2)|409 (ARRB2)|467 (ATF3)|718 (C3)|728 (C5AR1)|920 (CD4)|972 (CD74)|1050 (CEBPA)|1230 (CCR1)|1435 (CSF1)|1436 (CSF1R)|1445 (CSK)|1827 (RCAN1)|1844 (DUSP2)|2185 (PTK2B)|2268 (FGR)|2357 (FPR1)|3059 (HCLS1)|3077 (HFE)|3303 (HSPA1A)|3383 (ICAM1)|3570 (IL6R)|3689 (ITGB2)|3937 (LCP2)|3958 (LGALS3)|4057 (LTF)|4067 (LYN)|5294 (PIK3CG)|5580 (PRKCD)|5585 (PKN1)|5606 (MAP2K3)|5770 (PTPN1)…
	M	GO|GO.BP	GO:0030316	osteoclast differentiation	5.35338e-08	0.00610071	14	1051 (CEBPB)|1230 (CCR1)|1435 (CSF1)|1436 (CSF1R)|2207 (FCER1G)|3635 (INPP5D)|3726 (JUNB)|4057 (LTF)|7040 (TGFB1)|7305 (TYROBP)|8792 (TNFRSF11A)|22904 (SBNO2)|54209 (TREM2)|84959 (UBASH3B)
	M	GO|GO.CC	GO:0098552	side of membrane	5.59675e-08	0.00637805	36	920 (CD4)|923 (CD6)|929 (CD14)|942 (CD86)|972 (CD74)|1230 (CCR1)|1441 (CSF3R)|2185 (PTK2B)|2207 (FCER1G)|2242 (FES)|2268 (FGR)|2350 (FOLR2)|2683 (B4GALT1)|2769 (GNA15)|3077 (HFE)|3383 (ICAM1)|3570 (IL6R)|3682 (ITGAE)|3684 (ITGAM)|3689 (ITGB2)|4067 (LYN)|5770 (PTPN1)|5788 (PTPRC)|5996 (RGS1)|6892 (TAPBP)|7188 (TRAF5)|8764 (TNFRSF14)|8792 (TNFRSF11A)|9308 (CD83)|9332 (CD163)|10148 (EBI3)|23308 (ICO…
	M	GO|GO.BP	GO:0018108	peptidyl-tyrosine phosphorylation	5.7433e-08	0.00654507	29	409 (ARRB2)|695 (BTK)|920 (CD4)|972 (CD74)|1436 (CSF1R)|1439 (CSF2RB)|1445 (CSK)|2185 (PTK2B)|2242 (FES)|2268 (FGR)|3059 (HCLS1)|3383 (ICAM1)|3570 (IL6R)|3689 (ITGB2)|4067 (LYN)|5580 (PRKCD)|5606 (MAP2K3)|5770 (PTPN1)|5788 (PTPRC)|6503 (SLA)|7040 (TGFB1)|7132 (TNFRSF1A)|8764 (TNFRSF14)|8798 (DYRK4)|9021 (SOCS3)|9148 (NEURL1)|30844 (EHD4)|54209 (TREM2)|55024 (BANK1)
	M	GO|GO.BP	GO:0001932	regulation of protein phosphorylation	6.55494e-08	0.00747001	67	60 (ACTB)|154 (ADRB2)|409 (ARRB2)|467 (ATF3)|718 (C3)|728 (C5AR1)|920 (CD4)|972 (CD74)|1050 (CEBPA)|1230 (CCR1)|1435 (CSF1)|1436 (CSF1R)|1445 (CSK)|1844 (DUSP2)|2185 (PTK2B)|2268 (FGR)|2357 (FPR1)|3059 (HCLS1)|3077 (HFE)|3383 (ICAM1)|3570 (IL6R)|3689 (ITGB2)|3937 (LCP2)|4057 (LTF)|4067 (LYN)|5294 (PIK3CG)|5580 (PRKCD)|5585 (PKN1)|5606 (MAP2K3)|5770 (PTPN1)|5788 (PTPRC)|5880 (RAC2)|6347 (CCL2)|679…
	M	GO|GO.CC	GO:0044464	cell part	7.06615e-08	0.00805259	453	35 (ACADS)|60 (ACTB)|113 (ADCY7)|140 (ADORA3)|154 (ADRB2)|162 (AP1B1)|215 (ABCD1)|241 (ALOX5AP)|388 (RHOB)|393 (ARHGAP4)|409 (ARRB2)|463 (ZFHX3)|467 (ATF3)|598 (BCL2L1)|602 (BCL3)|637 (BID)|694 (BTG1)|695 (BTK)|718 (C3)|719 (C3AR1)|728 (C5AR1)|752 (FMNL1)|834 (CASP1)|920 (CD4)|923 (CD6)|929 (CD14)|933 (CD22)|942 (CD86)|951 (CD37)|963 (CD53)|972 (CD74)|1040 (CDS1)|1050 (CEBPA)|1051 (CEBPB)|1230 (C…
	M	GO|GO.BP	GO:0048523	negative regulation of cellular process	7.17568e-08	0.00817741	164	140 (ADORA3)|154 (ADRB2)|215 (ABCD1)|388 (RHOB)|393 (ARHGAP4)|409 (ARRB2)|463 (ZFHX3)|467 (ATF3)|598 (BCL2L1)|602 (BCL3)|637 (BID)|694 (BTG1)|695 (BTK)|714 (C1QC)|718 (C3)|728 (C5AR1)|929 (CD14)|933 (CD22)|942 (CD86)|972 (CD74)|1050 (CEBPA)|1051 (CEBPB)|1293 (COL6A3)|1436 (CSF1R)|1445 (CSK)|1471 (CST3)|1522 (CTSZ)|1535 (CYBA)|1820 (ARID3A)|1827 (RCAN1)|1844 (DUSP2)|1960 (EGR3)|2014 (EMP3)|2055 (C…
	M	GO|GO.MF	GO:0019901	protein kinase binding	7.20817e-08	0.00821443	39	60 (ACTB)|162 (AP1B1)|388 (RHOB)|409 (ARRB2)|598 (BCL2L1)|920 (CD4)|1445 (CSK)|1844 (DUSP2)|2099 (ESR1)|2185 (PTK2B)|2268 (FGR)|3059 (HCLS1)|3689 (ITGB2)|4772 (NFATC1)|5140 (PDE3B)|5341 (PLEK)|5580 (PRKCD)|5585 (PKN1)|5606 (MAP2K3)|5724 (PTAFR)|5770 (PTPN1)|5788 (PTPRC)|5829 (PXN)|5970 (RELA)|5971 (RELB)|7444 (VRK2)|7538 (ZFP36)|7867 (MAPKAPK3)|9261 (MAPKAPK2)|10019 (SH2B3)|10603 (SH2B2)|10636 (R…
	M	GO|GO.MF	GO:0035325	Toll-like receptor binding	7.29484e-08	0.00831321	6	6279 (S100A8)|6280 (S100A9)|7096 (TLR1)|7097 (TLR2)|10333 (TLR6)|81622 (UNC93B1)
	M	GO|GO.BP	GO:0097190	apoptotic signaling pathway	7.91032e-08	0.00901461	37	409 (ARRB2)|467 (ATF3)|598 (BCL2L1)|602 (BCL3)|637 (BID)|695 (BTK)|834 (CASP1)|929 (CD14)|972 (CD74)|1051 (CEBPB)|2872 (MKNK2)|3162 (HMOX1)|3303 (HSPA1A)|3383 (ICAM1)|3570 (IL6R)|3958 (LGALS3)|4836 (NMT1)|5054 (SERPINE1)|5326 (PLAGL2)|5580 (PRKCD)|5770 (PTPN1)|5788 (PTPRC)|5970 (RELA)|6279 (S100A8)|6280 (S100A9)|7040 (TGFB1)|7046 (TGFBR1)|7128 (TNFAIP3)|7132 (TNFRSF1A)|7133 (TNFRSF1B)|8879 (SGPL1…
	M	GO|GO.BP	GO:0051050	positive regulation of transport	8.04326e-08	0.0091661	50	60 (ACTB)|154 (ADRB2)|409 (ARRB2)|637 (BID)|718 (C3)|834 (CASP1)|920 (CD4)|929 (CD14)|1051 (CEBPB)|1230 (CCR1)|1436 (CSF1R)|1520 (CTSS)|1535 (CYBA)|1794 (DOCK2)|2207 (FCER1G)|2268 (FGR)|3059 (HCLS1)|3077 (HFE)|3566 (IL4R)|3684 (ITGAM)|3689 (ITGB2)|3958 (LGALS3)|4836 (NMT1)|5029 (P2RY2)|5054 (SERPINE1)|5336 (PLCG2)|5580 (PRKCD)|5724 (PTAFR)|5734 (PTGER4)|5788 (PTPRC)|5880 (RAC2)|6279 (S100A8)|6347…
	M	GO|GO.MF	GO:0005488	binding	8.12508e-08	0.00925934	408	35 (ACADS)|60 (ACTB)|113 (ADCY7)|154 (ADRB2)|162 (AP1B1)|215 (ABCD1)|241 (ALOX5AP)|388 (RHOB)|393 (ARHGAP4)|409 (ARRB2)|463 (ZFHX3)|467 (ATF3)|598 (BCL2L1)|602 (BCL3)|637 (BID)|694 (BTG1)|695 (BTK)|712 (C1QA)|713 (C1QB)|714 (C1QC)|718 (C3)|728 (C5AR1)|752 (FMNL1)|834 (CASP1)|920 (CD4)|923 (CD6)|929 (CD14)|933 (CD22)|942 (CD86)|951 (CD37)|963 (CD53)|972 (CD74)|1050 (CEBPA)|1051 (CEBPB)|1230 (CCR1)…
	M	GO|GO.BP	GO:0045619	regulation of lymphocyte differentiation	9.21146e-08	0.0104974	18	695 (BTK)|942 (CD86)|972 (CD74)|1960 (EGR3)|3111 (HLA-DOA)|3566 (IL4R)|3635 (INPP5D)|3659 (IRF1)|4860 (PNP)|5788 (PTPRC)|7040 (TGFB1)|8808 (IL1RL2)|9308 (CD83)|54440 (SASH3)|84433 (CARD11)|84807 (NFKBID)|114548 (NLRP3)|150372 (NFAM1)
	M	GO|GO.BP	GO:0044255	cellular lipid metabolic process	9.54132e-08	0.0108733	55	35 (ACADS)|215 (ABCD1)|718 (C3)|942 (CD86)|972 (CD74)|1040 (CDS1)|1436 (CSF1R)|2055 (CLN8)|2099 (ESR1)|2185 (PTK2B)|2268 (FGR)|2687 (GGT5)|3073 (HEXA)|3635 (INPP5D)|4067 (LYN)|4758 (NEU1)|5293 (PIK3CD)|5294 (PIK3CG)|5330 (PLCB2)|5336 (PLCG2)|5341 (PLEK)|5580 (PRKCD)|6916 (TBXAS1)|7040 (TGFB1)|7132 (TNFRSF1A)|7409 (VAV1)|8310 (ACOX3)|8527 (DGKD)|8877 (SPHK1)|8879 (SGPL1)|9021 (SOCS3)|9249 (DHRS3)|…
	M	GO|GO.CC	GO:0005774	vacuolar membrane	9.9327e-08	0.0113193	29	162 (AP1B1)|215 (ABCD1)|719 (C3AR1)|972 (CD74)|2357 (FPR1)|2683 (B4GALT1)|3109 (HLA-DMB)|3111 (HLA-DOA)|4758 (NEU1)|7107 (GPR137B)|7226 (TRPM2)|7805 (LAPTM5)|8673 (VAMP8)|9145 (SYNGR1)|10312 (TCIRG1)|10855 (HPSE)|11010 (GLIPR1)|23324 (MAN2B2)|51284 (TLR7)|51296 (SLC15A3)|54918 (CMTM6)|55315 (SLC29A3)|57153 (SLC44A2)|57521 (RPTOR)|57617 (VPS18)|124997 (WDR81)|150372 (NFAM1)|221955 (DAGLB)|375775 (…
	M	GO|GO.BP	GO:0071674	mononuclear cell migration	1.0221e-07	0.0116479	13	719 (C3AR1)|728 (C5AR1)|1230 (CCR1)|1240 (CMKLR1)|1435 (CSF1)|3570 (IL6R)|3958 (LGALS3)|4067 (LYN)|5054 (SERPINE1)|5641 (LGMN)|6347 (CCL2)|7040 (TGFB1)|8792 (TNFRSF11A)
	M	GO|GO.BP	GO:0050731	positive regulation of peptidyl-tyrosine phosphorylation	1.05663e-07	0.0120413	19	409 (ARRB2)|920 (CD4)|972 (CD74)|1436 (CSF1R)|2185 (PTK2B)|3059 (HCLS1)|3383 (ICAM1)|3570 (IL6R)|4067 (LYN)|5770 (PTPN1)|5788 (PTPRC)|7040 (TGFB1)|7132 (TNFRSF1A)|8764 (TNFRSF14)|9021 (SOCS3)|9148 (NEURL1)|30844 (EHD4)|54209 (TREM2)|55024 (BANK1)
	M	GO|GO.CC	GO:0005623	cell	1.17281e-07	0.0133653	453	35 (ACADS)|60 (ACTB)|113 (ADCY7)|140 (ADORA3)|154 (ADRB2)|162 (AP1B1)|215 (ABCD1)|241 (ALOX5AP)|388 (RHOB)|393 (ARHGAP4)|409 (ARRB2)|463 (ZFHX3)|467 (ATF3)|598 (BCL2L1)|602 (BCL3)|637 (BID)|694 (BTG1)|695 (BTK)|718 (C3)|719 (C3AR1)|728 (C5AR1)|752 (FMNL1)|834 (CASP1)|920 (CD4)|923 (CD6)|929 (CD14)|933 (CD22)|942 (CD86)|951 (CD37)|963 (CD53)|972 (CD74)|1040 (CDS1)|1050 (CEBPA)|1051 (CEBPB)|1230 (C…
	M	GO|GO.BP	GO:0030593	neutrophil chemotaxis	1.1797e-07	0.0134438	14	719 (C3AR1)|728 (C5AR1)|972 (CD74)|1441 (CSF3R)|2207 (FCER1G)|3689 (ITGB2)|3958 (LGALS3)|5293 (PIK3CD)|5294 (PIK3CG)|5880 (RAC2)|6279 (S100A8)|6280 (S100A9)|6347 (CCL2)|7409 (VAV1)
	M	GO|GO.BP	GO:0019538	protein metabolic process	1.18705e-07	0.0135276	192	60 (ACTB)|154 (ADRB2)|409 (ARRB2)|467 (ATF3)|602 (BCL3)|637 (BID)|695 (BTK)|712 (C1QA)|713 (C1QB)|714 (C1QC)|718 (C3)|719 (C3AR1)|728 (C5AR1)|834 (CASP1)|920 (CD4)|942 (CD86)|972 (CD74)|1050 (CEBPA)|1051 (CEBPB)|1230 (CCR1)|1293 (COL6A3)|1435 (CSF1)|1436 (CSF1R)|1439 (CSF2RB)|1445 (CSK)|1471 (CST3)|1509 (CTSD)|1520 (CTSS)|1522 (CTSZ)|1536 (CYBB)|1827 (RCAN1)|1844 (DUSP2)|2055 (CLN8)|2099 (ESR1)|2…
	M	GO|GO.BP	GO:0002755	MyD88-dependent toll-like receptor signaling pathway	1.19483e-07	0.0136162	9	695 (BTK)|929 (CD14)|3659 (IRF1)|4615 (MYD88)|7096 (TLR1)|7097 (TLR2)|7100 (TLR5)|10333 (TLR6)|51284 (TLR7)
	M	GO|GO.BP	GO:0008150	biological_process	1.2166e-07	0.0138644	469	35 (ACADS)|60 (ACTB)|113 (ADCY7)|140 (ADORA3)|154 (ADRB2)|162 (AP1B1)|215 (ABCD1)|241 (ALOX5AP)|388 (RHOB)|393 (ARHGAP4)|409 (ARRB2)|463 (ZFHX3)|467 (ATF3)|598 (BCL2L1)|602 (BCL3)|637 (BID)|694 (BTG1)|695 (BTK)|712 (C1QA)|713 (C1QB)|714 (C1QC)|718 (C3)|719 (C3AR1)|728 (C5AR1)|752 (FMNL1)|834 (CASP1)|920 (CD4)|923 (CD6)|929 (CD14)|933 (CD22)|942 (CD86)|951 (CD37)|963 (CD53)|972 (CD74)|1040 (CDS1)|…
	M	GO|GO.BP	GO:0030168	platelet activation	1.33439e-07	0.0152067	17	60 (ACTB)|409 (ARRB2)|2207 (FCER1G)|2769 (GNA15)|3937 (LCP2)|4067 (LYN)|5293 (PIK3CD)|5294 (PIK3CG)|5336 (PLCG2)|5341 (PLEK)|5580 (PRKCD)|7094 (TLN1)|7409 (VAV1)|8527 (DGKD)|23533 (PIK3R5)|83706 (FERMT3)|84959 (UBASH3B)
	M	GO|GO.CC	GO:0070821	tertiary granule membrane	1.39941e-07	0.0159477	12	963 (CD53)|1535 (CYBA)|1536 (CYBB)|2207 (FCER1G)|3684 (ITGAM)|3687 (ITGAX)|3689 (ITGB2)|5724 (PTAFR)|7226 (TRPM2)|8673 (VAMP8)|23218 (NBEAL2)|81619 (TSPAN14)
	M	GO|GO.BP	GO:0048585	negative regulation of response to stimulus	1.46045e-07	0.0166433	72	113 (ADCY7)|154 (ADRB2)|215 (ABCD1)|409 (ARRB2)|467 (ATF3)|598 (BCL2L1)|602 (BCL3)|637 (BID)|929 (CD14)|933 (CD22)|972 (CD74)|1436 (CSF1R)|1445 (CSK)|1827 (RCAN1)|1844 (DUSP2)|2099 (ESR1)|3077 (HFE)|3162 (HMOX1)|3303 (HSPA1A)|3383 (ICAM1)|3566 (IL4R)|3635 (INPP5D)|3955 (LFNG)|3958 (LGALS3)|4057 (LTF)|4067 (LYN)|4772 (NFATC1)|5054 (SERPINE1)|5140 (PDE3B)|5176 (SERPINF1)|5341 (PLEK)|5580 (PRKCD)|56…
	M	GO|GO.BP	GO:0032270	positive regulation of cellular protein metabolic process	1.54159e-07	0.0175679	71	154 (ADRB2)|409 (ARRB2)|602 (BCL3)|637 (BID)|718 (C3)|728 (C5AR1)|834 (CASP1)|920 (CD4)|972 (CD74)|1050 (CEBPA)|1230 (CCR1)|1435 (CSF1)|1436 (CSF1R)|1445 (CSK)|2185 (PTK2B)|2357 (FPR1)|3059 (HCLS1)|3077 (HFE)|3249 (HPN)|3303 (HSPA1A)|3383 (ICAM1)|3570 (IL6R)|3937 (LCP2)|4057 (LTF)|4067 (LYN)|5045 (FURIN)|5294 (PIK3CG)|5580 (PRKCD)|5585 (PKN1)|5606 (MAP2K3)|5641 (LGMN)|5724 (PTAFR)|5770 (PTPN1)|57…
	M	GO|GO.BP	GO:0050663	cytokine secretion	1.55869e-07	0.0177629	20	834 (CASP1)|929 (CD14)|1436 (CSF1R)|2268 (FGR)|3566 (IL4R)|3937 (LCP2)|4067 (LYN)|4860 (PNP)|5734 (PTGER4)|7096 (TLR1)|7097 (TLR2)|7100 (TLR5)|7128 (TNFAIP3)|8764 (TNFRSF14)|10333 (TLR6)|55024 (BANK1)|79792 (GSDMD)|84433 (CARD11)|84868 (HAVCR2)|114548 (NLRP3)
	M	GO|GO.BP	GO:0045859	regulation of protein kinase activity	1.56299e-07	0.0178118	43	60 (ACTB)|154 (ADRB2)|728 (C5AR1)|920 (CD4)|972 (CD74)|1050 (CEBPA)|1435 (CSF1)|1436 (CSF1R)|1445 (CSK)|1844 (DUSP2)|2185 (PTK2B)|2268 (FGR)|2357 (FPR1)|3570 (IL6R)|3937 (LCP2)|4057 (LTF)|4067 (LYN)|5294 (PIK3CG)|5580 (PRKCD)|5585 (PKN1)|5606 (MAP2K3)|5770 (PTPN1)|5788 (PTPRC)|5880 (RAC2)|6793 (STK10)|7040 (TGFB1)|7046 (TGFBR1)|7128 (TNFAIP3)|7867 (MAPKAPK3)|8536 (CAMK1)|8792 (TNFRSF11A)|9020 (MA…
	M	GO|GO.CC	GO:0030139	endocytic vesicle	1.59498e-07	0.0181764	24	409 (ARRB2)|752 (FMNL1)|972 (CD74)|1535 (CYBA)|1536 (CYBB)|3693 (ITGB5)|4057 (LTF)|4481 (MSR1)|4688 (NCF2)|4689 (NCF4)|5880 (RAC2)|6892 (TAPBP)|7096 (TLR1)|7097 (TLR2)|8673 (VAMP8)|9332 (CD163)|10312 (TCIRG1)|10333 (TLR6)|11151 (CORO1A)|23166 (STAB1)|51284 (TLR7)|55647 (RAB20)|81622 (UNC93B1)|122618 (PLD4)
	M	GO|GO.BP	GO:0046635	positive regulation of alpha-beta T cell activation	1.74562e-07	0.0198931	11	942 (CD86)|3566 (IL4R)|3570 (IL6R)|4860 (PNP)|5788 (PTPRC)|9308 (CD83)|10148 (EBI3)|54440 (SASH3)|64926 (RASAL3)|84807 (NFKBID)|114548 (NLRP3)
	M	GO|GO.BP	GO:0032623	interleukin-2 production	2.07719e-07	0.0236717	11	920 (CD4)|942 (CD86)|2207 (FCER1G)|4860 (PNP)|5788 (PTPRC)|7128 (TNFAIP3)|7538 (ZFP36)|9308 (CD83)|54440 (SASH3)|84433 (CARD11)|84868 (HAVCR2)
	M	GO|GO.BP	GO:0045595	regulation of cell differentiation	2.16114e-07	0.0246283	77	393 (ARHGAP4)|409 (ARRB2)|463 (ZFHX3)|694 (BTG1)|695 (BTK)|714 (C1QC)|920 (CD4)|942 (CD86)|963 (CD53)|972 (CD74)|1050 (CEBPA)|1051 (CEBPB)|1230 (CCR1)|1240 (CMKLR1)|1435 (CSF1)|1441 (CSF3R)|1522 (CTSZ)|1960 (EGR3)|2124 (EVI2B)|2185 (PTK2B)|2242 (FES)|3059 (HCLS1)|3111 (HLA-DOA)|3249 (HPN)|3303 (HSPA1A)|3566 (IL4R)|3570 (IL6R)|3635 (INPP5D)|3659 (IRF1)|3726 (JUNB)|3956 (LGALS1)|3958 (LGALS3)|4057 …
	M	GO|GO.BP	GO:0042325	regulation of phosphorylation	2.18219e-07	0.0248682	69	60 (ACTB)|154 (ADRB2)|215 (ABCD1)|409 (ARRB2)|467 (ATF3)|718 (C3)|728 (C5AR1)|920 (CD4)|972 (CD74)|1050 (CEBPA)|1230 (CCR1)|1435 (CSF1)|1436 (CSF1R)|1445 (CSK)|1844 (DUSP2)|2185 (PTK2B)|2268 (FGR)|2357 (FPR1)|3059 (HCLS1)|3077 (HFE)|3383 (ICAM1)|3570 (IL6R)|3689 (ITGB2)|3937 (LCP2)|4057 (LTF)|4067 (LYN)|5294 (PIK3CG)|5580 (PRKCD)|5585 (PKN1)|5606 (MAP2K3)|5770 (PTPN1)|5788 (PTPRC)|5880 (RAC2)|634…
	M	GO|GO.BP	GO:0051046	regulation of secretion	2.48336e-07	0.0283004	43	834 (CASP1)|929 (CD14)|933 (CD22)|972 (CD74)|1436 (CSF1R)|1535 (CYBA)|2207 (FCER1G)|2242 (FES)|2268 (FGR)|3077 (HFE)|3162 (HMOX1)|3566 (IL4R)|3684 (ITGAM)|3689 (ITGB2)|4067 (LYN)|4939 (OAS2)|5029 (P2RY2)|5724 (PTAFR)|5734 (PTGER4)|5880 (RAC2)|6279 (S100A8)|6446 (SGK1)|6696 (SPP1)|7040 (TGFB1)|7096 (TLR1)|7097 (TLR2)|7100 (TLR5)|7128 (TNFAIP3)|7132 (TNFRSF1A)|7133 (TNFRSF1B)|8673 (VAMP8)|8736 (MYO…
	M	GO|GO.BP	GO:0007169	transmembrane receptor protein tyrosine kinase signaling pathway	2.50426e-07	0.0285386	40	60 (ACTB)|154 (ADRB2)|920 (CD4)|1435 (CSF1)|1436 (CSF1R)|1535 (CYBA)|1536 (CYBB)|1796 (DOK1)|2185 (PTK2B)|2268 (FGR)|3249 (HPN)|3937 (LCP2)|4067 (LYN)|4688 (NCF2)|4689 (NCF4)|5580 (PRKCD)|5641 (LGMN)|5770 (PTPN1)|5829 (PXN)|5970 (RELA)|7040 (TGFB1)|7409 (VAV1)|7867 (MAPKAPK3)|8527 (DGKD)|8879 (SGPL1)|9021 (SOCS3)|9148 (NEURL1)|9261 (MAPKAPK2)|10019 (SH2B3)|10163 (WASF2)|10312 (TCIRG1)|10603 (SH2B…
	M	GO|GO.BP	GO:0050851	antigen receptor-mediated signaling pathway	2.81129e-07	0.0320374	22	695 (BTK)|920 (CD4)|933 (CD22)|1445 (CSK)|2533 (FYB1)|3635 (INPP5D)|3937 (LCP2)|3958 (LGALS3)|4067 (LYN)|5293 (PIK3CD)|5336 (PLCG2)|5788 (PTPRC)|5970 (RELA)|7462 (LAT2)|9404 (LPXN)|10603 (SH2B2)|23228 (PLCL2)|23308 (ICOSLG)|84433 (CARD11)|84807 (NFKBID)|114625 (ERMAP)|150372 (NFAM1)
	M	GO|GO.BP	GO:0019220	regulation of phosphate metabolic process	2.81954e-07	0.0321315	75	60 (ACTB)|154 (ADRB2)|215 (ABCD1)|409 (ARRB2)|467 (ATF3)|718 (C3)|728 (C5AR1)|920 (CD4)|972 (CD74)|1050 (CEBPA)|1230 (CCR1)|1435 (CSF1)|1436 (CSF1R)|1445 (CSK)|1827 (RCAN1)|1844 (DUSP2)|2185 (PTK2B)|2268 (FGR)|2357 (FPR1)|3059 (HCLS1)|3077 (HFE)|3383 (ICAM1)|3570 (IL6R)|3689 (ITGB2)|3937 (LCP2)|3958 (LGALS3)|4057 (LTF)|4067 (LYN)|5294 (PIK3CG)|5341 (PLEK)|5580 (PRKCD)|5585 (PKN1)|5606 (MAP2K3)|57…
	M	GO|GO.MF	GO:0019955	cytokine binding	2.9043e-07	0.0330974	15	920 (CD4)|972 (CD74)|1230 (CCR1)|1436 (CSF1R)|1441 (CSF3R)|3459 (IFNGR1)|3570 (IL6R)|3587 (IL10RA)|7046 (TGFBR1)|7132 (TNFRSF1A)|7133 (TNFRSF1B)|7538 (ZFP36)|8557 (TCAP)|8792 (TNFRSF11A)|10148 (EBI3)
	M	GO|GO.BP	GO:0051174	regulation of phosphorus metabolic process	2.94944e-07	0.0336119	75	60 (ACTB)|154 (ADRB2)|215 (ABCD1)|409 (ARRB2)|467 (ATF3)|718 (C3)|728 (C5AR1)|920 (CD4)|972 (CD74)|1050 (CEBPA)|1230 (CCR1)|1435 (CSF1)|1436 (CSF1R)|1445 (CSK)|1827 (RCAN1)|1844 (DUSP2)|2185 (PTK2B)|2268 (FGR)|2357 (FPR1)|3059 (HCLS1)|3077 (HFE)|3383 (ICAM1)|3570 (IL6R)|3689 (ITGB2)|3937 (LCP2)|3958 (LGALS3)|4057 (LTF)|4067 (LYN)|5294 (PIK3CG)|5341 (PLEK)|5580 (PRKCD)|5585 (PKN1)|5606 (MAP2K3)|57…
	M	GO|GO.BP	GO:0030198	extracellular matrix organization	2.97534e-07	0.033907	26	602 (BCL3)|1293 (COL6A3)|1471 (CST3)|1520 (CTSS)|2683 (B4GALT1)|3249 (HPN)|3383 (ICAM1)|3682 (ITGAE)|3683 (ITGAL)|3684 (ITGAM)|3687 (ITGAX)|3689 (ITGB2)|3693 (ITGB5)|3936 (LCP1)|4791 (NFKB2)|5045 (FURIN)|5054 (SERPINE1)|5351 (PLOD1)|6696 (SPP1)|7040 (TGFB1)|7045 (TGFBI)|7046 (TGFBR1)|7132 (TNFRSF1A)|7133 (TNFRSF1B)|8985 (PLOD3)|85301 (COL27A1)
	M	GO|GO.BP	GO:0030100	regulation of endocytosis	3.00454e-07	0.0342398	22	409 (ARRB2)|718 (C3)|929 (CD14)|933 (CD22)|1445 (CSK)|1535 (CYBA)|1794 (DOCK2)|2207 (FCER1G)|2268 (FGR)|3077 (HFE)|3684 (ITGAM)|3958 (LGALS3)|5054 (SERPINE1)|5336 (PLCG2)|5770 (PTPN1)|5788 (PTPRC)|6347 (CCL2)|7040 (TGFB1)|7097 (TLR2)|29904 (EEF2K)|30844 (EHD4)|55647 (RAB20)
	M	GO|GO.BP	GO:0002688	regulation of leukocyte chemotaxis	3.10051e-07	0.0353335	14	719 (C3AR1)|728 (C5AR1)|972 (CD74)|1230 (CCR1)|1240 (CMKLR1)|1435 (CSF1)|2185 (PTK2B)|3570 (IL6R)|4067 (LYN)|5054 (SERPINE1)|5641 (LGMN)|5880 (RAC2)|6347 (CCL2)|63940 (GPSM3)
	M	GO|GO.BP	GO:0042060	wound healing	3.15047e-07	0.0359027	34	60 (ACTB)|409 (ARRB2)|2027 (ENO3)|2162 (F13A1)|2207 (FCER1G)|2683 (B4GALT1)|2769 (GNA15)|3162 (HMOX1)|3659 (IRF1)|3937 (LCP2)|4067 (LYN)|4814 (NINJ1)|5054 (SERPINE1)|5293 (PIK3CD)|5294 (PIK3CG)|5336 (PLCG2)|5341 (PLEK)|5580 (PRKCD)|6279 (S100A8)|6665 (SOX15)|7040 (TGFB1)|7046 (TGFBR1)|7094 (TLN1)|7128 (TNFAIP3)|7409 (VAV1)|7480 (WNT10B)|8527 (DGKD)|10019 (SH2B3)|10603 (SH2B2)|10855 (HPSE)|23533 (…
	M	GO|GO.BP	GO:0050878	regulation of body fluid levels	3.19981e-07	0.036465	32	60 (ACTB)|113 (ADCY7)|409 (ARRB2)|1535 (CYBA)|2162 (F13A1)|2207 (FCER1G)|2769 (GNA15)|3099 (HK2)|3659 (IRF1)|3937 (LCP2)|4067 (LYN)|4939 (OAS2)|5029 (P2RY2)|5054 (SERPINE1)|5293 (PIK3CD)|5294 (PIK3CG)|5336 (PLCG2)|5341 (PLEK)|5580 (PRKCD)|7094 (TLN1)|7409 (VAV1)|8527 (DGKD)|8673 (VAMP8)|9148 (NEURL1)|10019 (SH2B3)|10603 (SH2B2)|10855 (HPSE)|23533 (PIK3R5)|25946 (ZNF385A)|81704 (DOCK8)|83706 (FERM…
	M	GO|GO.BP	GO:0030335	positive regulation of cell migration	3.33653e-07	0.0380231	33	388 (RHOB)|719 (C3AR1)|728 (C5AR1)|972 (CD74)|1230 (CCR1)|1240 (CMKLR1)|1435 (CSF1)|1436 (CSF1R)|2185 (PTK2B)|2268 (FGR)|3162 (HMOX1)|3383 (ICAM1)|3570 (IL6R)|3958 (LGALS3)|4067 (LYN)|5054 (SERPINE1)|5293 (PIK3CD)|5606 (MAP2K3)|5641 (LGMN)|5724 (PTAFR)|5788 (PTPRC)|5880 (RAC2)|6693 (SPN)|7040 (TGFB1)|7046 (TGFBR1)|8764 (TNFRSF14)|8877 (SPHK1)|11151 (CORO1A)|25777 (SUN2)|58191 (CXCL16)|63940 (GPSM…
	M	GO|GO.BP	GO:0040017	positive regulation of locomotion	3.3412e-07	0.0380764	35	388 (RHOB)|719 (C3AR1)|728 (C5AR1)|972 (CD74)|1230 (CCR1)|1240 (CMKLR1)|1435 (CSF1)|1436 (CSF1R)|2185 (PTK2B)|2268 (FGR)|3162 (HMOX1)|3383 (ICAM1)|3570 (IL6R)|3603 (IL16)|3958 (LGALS3)|4067 (LYN)|5054 (SERPINE1)|5293 (PIK3CD)|5606 (MAP2K3)|5641 (LGMN)|5724 (PTAFR)|5788 (PTPRC)|5880 (RAC2)|6693 (SPN)|7040 (TGFB1)|7046 (TGFBR1)|8764 (TNFRSF14)|8877 (SPHK1)|11151 (CORO1A)|25777 (SUN2)|58191 (CXCL16)…
	M	GO|GO.BP	GO:0002822	regulation of adaptive immune response based on somatic recombination of immune receptors built from immunoglobulin superfamily domains	3.4124e-07	0.0388878	16	695 (BTK)|718 (C3)|920 (CD4)|2207 (FCER1G)|3077 (HFE)|3566 (IL4R)|3570 (IL6R)|5585 (PKN1)|5788 (PTPRC)|6778 (STAT6)|7040 (TGFB1)|7128 (TNFAIP3)|54440 (SASH3)|84807 (NFKBID)|84868 (HAVCR2)|114548 (NLRP3)
	M	GO|GO.CC	GO:0043202	lysosomal lumen	3.43129e-07	0.0391029	13	972 (CD74)|1509 (CTSD)|1520 (CTSS)|2588 (GALNS)|2799 (GNS)|3073 (HEXA)|4669 (NAGLU)|4758 (NEU1)|5641 (LGMN)|6948 (TCN2)|8635 (RNASET2)|10855 (HPSE)|23324 (MAN2B2)
	M	GO|GO.BP	GO:0071705	nitrogen compound transport	3.46552e-07	0.0394931	93	60 (ACTB)|162 (AP1B1)|215 (ABCD1)|388 (RHOB)|409 (ARRB2)|602 (BCL3)|637 (BID)|695 (BTK)|834 (CASP1)|929 (CD14)|933 (CD22)|972 (CD74)|1436 (CSF1R)|1445 (CSK)|1535 (CYBA)|2055 (CLN8)|2207 (FCER1G)|2268 (FGR)|2350 (FOLR2)|2533 (FYB1)|3059 (HCLS1)|3077 (HFE)|3566 (IL4R)|3684 (ITGAM)|3689 (ITGB2)|3936 (LCP1)|3937 (LCP2)|4067 (LYN)|4481 (MSR1)|4794 (NFKBIE)|4860 (PNP)|5029 (P2RY2)|5341 (PLEK)|5452 (POU…
	M	GO|GO.BP	GO:0043302	positive regulation of leukocyte degranulation	3.5723e-07	0.04071	7	2207 (FCER1G)|2268 (FGR)|3566 (IL4R)|3684 (ITGAM)|3689 (ITGB2)|5724 (PTAFR)|8673 (VAMP8)
	M	GO|GO.BP	GO:0032677	regulation of interleukin-8 production	4.0295e-07	0.0459202	11	602 (BCL3)|929 (CD14)|3303 (HSPA1A)|4615 (MYD88)|5054 (SERPINE1)|5788 (PTPRC)|7096 (TLR1)|7097 (TLR2)|7100 (TLR5)|10333 (TLR6)|51284 (TLR7)
	M	GO|GO.BP	GO:1990266	neutrophil migration	4.35401e-07	0.0496183	14	719 (C3AR1)|728 (C5AR1)|972 (CD74)|1441 (CSF3R)|2207 (FCER1G)|3689 (ITGB2)|3958 (LGALS3)|5293 (PIK3CD)|5294 (PIK3CG)|5880 (RAC2)|6279 (S100A8)|6280 (S100A9)|6347 (CCL2)|7409 (VAV1)
	M	GO|GO.BP	GO:0043062	extracellular structure organization	4.36763e-07	0.0497735	28	602 (BCL3)|1293 (COL6A3)|1471 (CST3)|1520 (CTSS)|2683 (B4GALT1)|3249 (HPN)|3383 (ICAM1)|3682 (ITGAE)|3683 (ITGAL)|3684 (ITGAM)|3687 (ITGAX)|3689 (ITGB2)|3693 (ITGB5)|3936 (LCP1)|4353 (MPO)|4791 (NFKB2)|5045 (FURIN)|5054 (SERPINE1)|5326 (PLAGL2)|5351 (PLOD1)|6696 (SPP1)|7040 (TGFB1)|7045 (TGFBI)|7046 (TGFBR1)|7132 (TNFRSF1A)|7133 (TNFRSF1B)|8985 (PLOD3)|85301 (COL27A1)
	EC	GO|GO.CC	GO:0071944	cell periphery	7.11346e-26	8.10649e-21	232	81 (ACTN4)|87 (ACTN1)|94 (ACVRL1)|102 (ADAM10)|125 (ADH1B)|135 (ADORA2A)|182 (JAG1)|187 (APLNR)|285 (ANGPT2)|301 (ANXA1)|302 (ANXA2)|306 (ANXA3)|308 (ANXA5)|310 (ANXA7)|368 (ABCC6)|389 (RHOC)|419 (ART3)|633 (BGN)|682 (BSG)|762 (CA4)|857 (CAV1)|947 (CD34)|958 (CD40)|966 (CD59)|977 (CD151)|1003 (CDH5)|1258 (CNGB1)|1317 (SLC31A1)|1378 (CR1)|1495 (CTNNA1)|1604 (CD55)|1803 (DPP4)|1889 (ECE1)|1942 (EFN…
	EC	GO|GO.CC	GO:0005886	plasma membrane	1.6502e-24	1.88057e-19	226	87 (ACTN1)|94 (ACVRL1)|102 (ADAM10)|125 (ADH1B)|135 (ADORA2A)|182 (JAG1)|187 (APLNR)|285 (ANGPT2)|301 (ANXA1)|302 (ANXA2)|306 (ANXA3)|308 (ANXA5)|310 (ANXA7)|368 (ABCC6)|389 (RHOC)|419 (ART3)|633 (BGN)|682 (BSG)|762 (CA4)|857 (CAV1)|947 (CD34)|958 (CD40)|966 (CD59)|977 (CD151)|1003 (CDH5)|1258 (CNGB1)|1317 (SLC31A1)|1378 (CR1)|1495 (CTNNA1)|1604 (CD55)|1803 (DPP4)|1889 (ECE1)|1942 (EFNA1)|2012 (E…
	EC	GO|GO.BP	GO:0001568	blood vessel development	3.22627e-24	3.67666e-19	70	94 (ACVRL1)|182 (JAG1)|187 (APLNR)|196 (AHR)|285 (ANGPT2)|301 (ANXA1)|302 (ANXA2)|306 (ANXA3)|857 (CAV1)|947 (CD34)|958 (CD40)|1003 (CDH5)|1282 (COL4A1)|1285 (COL4A3)|1893 (ECM1)|1942 (EFNA1)|2022 (ENG)|2050 (EPHB4)|2113 (ETS1)|2296 (FOXC1)|2321 (FLT1)|2324 (FLT4)|2335 (FN1)|2624 (GATA2)|2701 (GJA4)|2702 (GJA5)|2828 (GPR4)|3315 (HSPB1)|3339 (HSPG2)|3688 (ITGB1)|3791 (KDR)|3911 (LAMA5)|3953 (LEPR)…
	EC	GO|GO.BP	GO:0072358	cardiovascular system development	3.3612e-24	3.83042e-19	72	94 (ACVRL1)|182 (JAG1)|187 (APLNR)|196 (AHR)|285 (ANGPT2)|301 (ANXA1)|302 (ANXA2)|306 (ANXA3)|857 (CAV1)|947 (CD34)|958 (CD40)|1003 (CDH5)|1282 (COL4A1)|1285 (COL4A3)|1893 (ECM1)|1942 (EFNA1)|2022 (ENG)|2050 (EPHB4)|2113 (ETS1)|2296 (FOXC1)|2321 (FLT1)|2324 (FLT4)|2335 (FN1)|2624 (GATA2)|2701 (GJA4)|2702 (GJA5)|2828 (GPR4)|3315 (HSPB1)|3339 (HSPG2)|3688 (ITGB1)|3784 (KCNQ1)|3791 (KDR)|3911 (LAMA5…
	EC	GO|GO.BP	GO:0035239	tube morphogenesis	1.62108e-23	1.84738e-18	76	94 (ACVRL1)|182 (JAG1)|187 (APLNR)|285 (ANGPT2)|301 (ANXA1)|302 (ANXA2)|306 (ANXA3)|857 (CAV1)|947 (CD34)|958 (CD40)|1003 (CDH5)|1282 (COL4A1)|1285 (COL4A3)|1893 (ECM1)|1942 (EFNA1)|2022 (ENG)|2050 (EPHB4)|2113 (ETS1)|2296 (FOXC1)|2321 (FLT1)|2324 (FLT4)|2335 (FN1)|2624 (GATA2)|2702 (GJA5)|2828 (GPR4)|3315 (HSPB1)|3339 (HSPG2)|3688 (ITGB1)|3791 (KDR)|3911 (LAMA5)|3953 (LEPR)|4017 (LOXL2)|4638 (MY…
	EC	GO|GO.BP	GO:0048514	blood vessel morphogenesis	2.30505e-23	2.62684e-18	65	94 (ACVRL1)|182 (JAG1)|187 (APLNR)|285 (ANGPT2)|301 (ANXA1)|302 (ANXA2)|306 (ANXA3)|857 (CAV1)|947 (CD34)|958 (CD40)|1003 (CDH5)|1282 (COL4A1)|1285 (COL4A3)|1893 (ECM1)|1942 (EFNA1)|2022 (ENG)|2050 (EPHB4)|2113 (ETS1)|2296 (FOXC1)|2321 (FLT1)|2324 (FLT4)|2335 (FN1)|2624 (GATA2)|2702 (GJA5)|2828 (GPR4)|3315 (HSPB1)|3339 (HSPG2)|3688 (ITGB1)|3791 (KDR)|3911 (LAMA5)|3953 (LEPR)|4017 (LOXL2)|4638 (MY…
	EC	GO|GO.BP	GO:0001944	vasculature development	4.16431e-23	4.74565e-18	70	94 (ACVRL1)|182 (JAG1)|187 (APLNR)|196 (AHR)|285 (ANGPT2)|301 (ANXA1)|302 (ANXA2)|306 (ANXA3)|857 (CAV1)|947 (CD34)|958 (CD40)|1003 (CDH5)|1282 (COL4A1)|1285 (COL4A3)|1893 (ECM1)|1942 (EFNA1)|2022 (ENG)|2050 (EPHB4)|2113 (ETS1)|2296 (FOXC1)|2321 (FLT1)|2324 (FLT4)|2335 (FN1)|2624 (GATA2)|2701 (GJA4)|2702 (GJA5)|2828 (GPR4)|3315 (HSPB1)|3339 (HSPG2)|3688 (ITGB1)|3791 (KDR)|3911 (LAMA5)|3953 (LEPR)…
	EC	GO|GO.CC	GO:0044459	plasma membrane part	6.01634e-23	6.85622e-18	145	94 (ACVRL1)|102 (ADAM10)|135 (ADORA2A)|182 (JAG1)|187 (APLNR)|301 (ANXA1)|302 (ANXA2)|308 (ANXA5)|368 (ABCC6)|389 (RHOC)|419 (ART3)|682 (BSG)|762 (CA4)|857 (CAV1)|947 (CD34)|958 (CD40)|966 (CD59)|977 (CD151)|1003 (CDH5)|1258 (CNGB1)|1317 (SLC31A1)|1378 (CR1)|1495 (CTNNA1)|1803 (DPP4)|1889 (ECE1)|1942 (EFNA1)|2022 (ENG)|2050 (EPHB4)|2149 (F2R)|2321 (FLT1)|2324 (FLT4)|2335 (FN1)|2444 (FRK)|2615 (LR…
	EC	GO|GO.BP	GO:0035295	tube development	1.18073e-21	1.34556e-16	81	94 (ACVRL1)|182 (JAG1)|187 (APLNR)|285 (ANGPT2)|301 (ANXA1)|302 (ANXA2)|306 (ANXA3)|857 (CAV1)|947 (CD34)|958 (CD40)|1003 (CDH5)|1282 (COL4A1)|1285 (COL4A3)|1893 (ECM1)|1942 (EFNA1)|2022 (ENG)|2050 (EPHB4)|2113 (ETS1)|2296 (FOXC1)|2321 (FLT1)|2324 (FLT4)|2335 (FN1)|2624 (GATA2)|2702 (GJA5)|2828 (GPR4)|3315 (HSPB1)|3339 (HSPG2)|3688 (ITGB1)|3791 (KDR)|3911 (LAMA5)|3953 (LEPR)|4017 (LOXL2)|4091 (SM…
	EC	GO|GO.BP	GO:0072359	circulatory system development	1.562e-21	1.78005e-16	83	32 (ACACB)|94 (ACVRL1)|182 (JAG1)|187 (APLNR)|196 (AHR)|285 (ANGPT2)|301 (ANXA1)|302 (ANXA2)|306 (ANXA3)|857 (CAV1)|947 (CD34)|958 (CD40)|1003 (CDH5)|1282 (COL4A1)|1285 (COL4A3)|1848 (DUSP6)|1889 (ECE1)|1893 (ECM1)|1942 (EFNA1)|2022 (ENG)|2050 (EPHB4)|2113 (ETS1)|2296 (FOXC1)|2321 (FLT1)|2324 (FLT4)|2335 (FN1)|2624 (GATA2)|2701 (GJA4)|2702 (GJA5)|2828 (GPR4)|3315 (HSPB1)|3339 (HSPG2)|3688 (ITGB1)…
	EC	GO|GO.BP	GO:0001525	angiogenesis	1.65264e-21	1.88334e-16	58	94 (ACVRL1)|182 (JAG1)|187 (APLNR)|285 (ANGPT2)|301 (ANXA1)|302 (ANXA2)|306 (ANXA3)|857 (CAV1)|947 (CD34)|958 (CD40)|1003 (CDH5)|1282 (COL4A1)|1285 (COL4A3)|1893 (ECM1)|1942 (EFNA1)|2022 (ENG)|2050 (EPHB4)|2113 (ETS1)|2296 (FOXC1)|2321 (FLT1)|2324 (FLT4)|2335 (FN1)|2624 (GATA2)|2702 (GJA5)|2828 (GPR4)|3315 (HSPB1)|3339 (HSPG2)|3688 (ITGB1)|3791 (KDR)|3911 (LAMA5)|3953 (LEPR)|4017 (LOXL2)|4846 (NO…
	EC	GO|GO.BP	GO:0048646	anatomical structure formation involved in morphogenesis	1.74534e-21	1.98899e-16	83	87 (ACTN1)|94 (ACVRL1)|182 (JAG1)|187 (APLNR)|285 (ANGPT2)|301 (ANXA1)|302 (ANXA2)|306 (ANXA3)|857 (CAV1)|947 (CD34)|958 (CD40)|1003 (CDH5)|1282 (COL4A1)|1285 (COL4A3)|1893 (ECM1)|1942 (EFNA1)|2022 (ENG)|2050 (EPHB4)|2113 (ETS1)|2296 (FOXC1)|2321 (FLT1)|2324 (FLT4)|2335 (FN1)|2624 (GATA2)|2702 (GJA5)|2828 (GPR4)|3315 (HSPB1)|3339 (HSPG2)|3688 (ITGB1)|3791 (KDR)|3911 (LAMA5)|3912 (LAMB1)|3953 (LEP…
	EC	GO|GO.BP	GO:0009653	anatomical structure morphogenesis	3.42225e-21	3.9e-16	134	81 (ACTN4)|87 (ACTN1)|94 (ACVRL1)|102 (ADAM10)|135 (ADORA2A)|182 (JAG1)|187 (APLNR)|285 (ANGPT2)|301 (ANXA1)|302 (ANXA2)|306 (ANXA3)|309 (ANXA6)|310 (ANXA7)|389 (RHOC)|682 (BSG)|857 (CAV1)|871 (SERPINH1)|947 (CD34)|958 (CD40)|977 (CD151)|1003 (CDH5)|1282 (COL4A1)|1285 (COL4A3)|1495 (CTNNA1)|1889 (ECE1)|1893 (ECM1)|1942 (EFNA1)|2022 (ENG)|2050 (EPHB4)|2113 (ETS1)|2149 (F2R)|2296 (FOXC1)|2313 (FLI1…
	EC	GO|GO.BP	GO:0051270	regulation of cellular component movement	2.62058e-20	2.98642e-15	77	81 (ACTN4)|87 (ACTN1)|94 (ACVRL1)|102 (ADAM10)|182 (JAG1)|285 (ANGPT2)|301 (ANXA1)|306 (ANXA3)|308 (ANXA5)|389 (RHOC)|857 (CAV1)|958 (CD40)|977 (CD151)|1495 (CTNNA1)|1893 (ECM1)|1942 (EFNA1)|2022 (ENG)|2113 (ETS1)|2149 (F2R)|2321 (FLT1)|2324 (FLT4)|2335 (FN1)|2624 (GATA2)|2651 (GCNT2)|2702 (GJA5)|2886 (GRB7)|3315 (HSPB1)|3480 (IGF1R)|3554 (IL1R1)|3717 (JAK2)|3759 (KCNJ2)|3791 (KDR)|3910 (LAMA4)|3…
	EC	GO|GO.BP	GO:0007155	cell adhesion	3.71881e-20	4.23795e-15	90	81 (ACTN4)|87 (ACTN1)|94 (ACVRL1)|102 (ADAM10)|135 (ADORA2A)|182 (JAG1)|285 (ANGPT2)|301 (ANXA1)|302 (ANXA2)|306 (ANXA3)|682 (BSG)|857 (CAV1)|947 (CD34)|977 (CD151)|1003 (CDH5)|1285 (COL4A3)|1495 (CTNNA1)|1604 (CD55)|1803 (DPP4)|1842 (ECM2)|1942 (EFNA1)|2022 (ENG)|2050 (EPHB4)|2113 (ETS1)|2335 (FN1)|2615 (LRRC32)|2651 (GCNT2)|3315 (HSPB1)|3384 (ICAM2)|3490 (IGFBP7)|3672 (ITGA1)|3688 (ITGB1)|3714 …
	EC	GO|GO.BP	GO:0022610	biological adhesion	5.43531e-20	6.19408e-15	90	81 (ACTN4)|87 (ACTN1)|94 (ACVRL1)|102 (ADAM10)|135 (ADORA2A)|182 (JAG1)|285 (ANGPT2)|301 (ANXA1)|302 (ANXA2)|306 (ANXA3)|682 (BSG)|857 (CAV1)|947 (CD34)|977 (CD151)|1003 (CDH5)|1285 (COL4A3)|1495 (CTNNA1)|1604 (CD55)|1803 (DPP4)|1842 (ECM2)|1942 (EFNA1)|2022 (ENG)|2050 (EPHB4)|2113 (ETS1)|2335 (FN1)|2615 (LRRC32)|2651 (GCNT2)|3315 (HSPB1)|3384 (ICAM2)|3490 (IGFBP7)|3672 (ITGA1)|3688 (ITGB1)|3714 …
	EC	GO|GO.CC	GO:0062023	collagen-containing extracellular matrix	9.30051e-20	1.05989e-14	42	301 (ANXA1)|302 (ANXA2)|308 (ANXA5)|309 (ANXA6)|633 (BGN)|871 (SERPINH1)|977 (CD151)|1282 (COL4A1)|1285 (COL4A3)|1842 (ECM2)|1893 (ECM1)|2335 (FN1)|3339 (HSPG2)|3490 (IGFBP7)|3910 (LAMA4)|3911 (LAMA5)|3912 (LAMB1)|3915 (LAMC1)|4017 (LOXL2)|4059 (BCAM)|4256 (MGP)|4811 (NID1)|5265 (SERPINA1)|5269 (SERPINB6)|5272 (SERPINB9)|7041 (TGFB1I1)|7076 (TIMP1)|7448 (VTN)|7450 (VWF)|10516 (FBLN5)|11095 (ADAMT…
	EC	GO|GO.BP	GO:2000145	regulation of cell motility	2.18987e-19	2.49558e-14	72	81 (ACTN4)|94 (ACVRL1)|102 (ADAM10)|182 (JAG1)|285 (ANGPT2)|301 (ANXA1)|306 (ANXA3)|308 (ANXA5)|389 (RHOC)|857 (CAV1)|958 (CD40)|977 (CD151)|1495 (CTNNA1)|1893 (ECM1)|1942 (EFNA1)|2022 (ENG)|2113 (ETS1)|2149 (F2R)|2321 (FLT1)|2324 (FLT4)|2335 (FN1)|2624 (GATA2)|2651 (GCNT2)|2886 (GRB7)|3315 (HSPB1)|3480 (IGF1R)|3554 (IL1R1)|3717 (JAK2)|3791 (KDR)|3910 (LAMA4)|3911 (LAMA5)|3912 (LAMB1)|4254 (KITLG…
	EC	GO|GO.BP	GO:0040012	regulation of locomotion	2.30544e-19	2.62728e-14	75	81 (ACTN4)|94 (ACVRL1)|102 (ADAM10)|135 (ADORA2A)|182 (JAG1)|285 (ANGPT2)|301 (ANXA1)|306 (ANXA3)|308 (ANXA5)|389 (RHOC)|857 (CAV1)|958 (CD40)|977 (CD151)|1495 (CTNNA1)|1893 (ECM1)|1942 (EFNA1)|2022 (ENG)|2113 (ETS1)|2149 (F2R)|2321 (FLT1)|2324 (FLT4)|2335 (FN1)|2624 (GATA2)|2651 (GCNT2)|2886 (GRB7)|3315 (HSPB1)|3480 (IGF1R)|3554 (IL1R1)|3717 (JAK2)|3791 (KDR)|3910 (LAMA4)|3911 (LAMA5)|3912 (LAMB…
	EC	GO|GO.BP	GO:0048583	regulation of response to stimulus	7.98925e-19	9.10455e-14	177	81 (ACTN4)|94 (ACVRL1)|102 (ADAM10)|135 (ADORA2A)|182 (JAG1)|187 (APLNR)|285 (ANGPT2)|301 (ANXA1)|302 (ANXA2)|306 (ANXA3)|308 (ANXA5)|389 (RHOC)|666 (BOK)|857 (CAV1)|947 (CD34)|958 (CD40)|966 (CD59)|1003 (CDH5)|1030 (CDKN2B)|1258 (CNGB1)|1378 (CR1)|1495 (CTNNA1)|1604 (CD55)|1848 (DUSP6)|1893 (ECM1)|1942 (EFNA1)|1997 (ELF1)|2022 (ENG)|2050 (EPHB4)|2113 (ETS1)|2122 (MECOM)|2149 (F2R)|2321 (FLT1)|23…
	EC	GO|GO.BP	GO:0030334	regulation of cell migration	1.97077e-18	2.2459e-13	68	81 (ACTN4)|94 (ACVRL1)|102 (ADAM10)|182 (JAG1)|285 (ANGPT2)|301 (ANXA1)|306 (ANXA3)|389 (RHOC)|857 (CAV1)|958 (CD40)|977 (CD151)|1893 (ECM1)|1942 (EFNA1)|2022 (ENG)|2113 (ETS1)|2149 (F2R)|2321 (FLT1)|2324 (FLT4)|2335 (FN1)|2624 (GATA2)|2651 (GCNT2)|2886 (GRB7)|3315 (HSPB1)|3480 (IGF1R)|3554 (IL1R1)|3717 (JAK2)|3791 (KDR)|3910 (LAMA4)|3911 (LAMA5)|3912 (LAMB1)|4254 (KITLG)|4638 (MYLK)|4690 (NCK1)|…
	EC	GO|GO.BP	GO:0040011	locomotion	7.32792e-18	8.35089e-13	104	81 (ACTN4)|94 (ACVRL1)|102 (ADAM10)|135 (ADORA2A)|182 (JAG1)|285 (ANGPT2)|301 (ANXA1)|306 (ANXA3)|308 (ANXA5)|309 (ANXA6)|389 (RHOC)|682 (BSG)|857 (CAV1)|947 (CD34)|958 (CD40)|977 (CD151)|1495 (CTNNA1)|1803 (DPP4)|1893 (ECM1)|1942 (EFNA1)|2022 (ENG)|2050 (EPHB4)|2113 (ETS1)|2149 (F2R)|2296 (FOXC1)|2321 (FLT1)|2324 (FLT4)|2335 (FN1)|2624 (GATA2)|2651 (GCNT2)|2826 (CCR10)|2886 (GRB7)|2887 (GRB10)|3…
	EC	GO|GO.CC	GO:0031012	extracellular matrix	8.89421e-18	1.01358e-12	48	301 (ANXA1)|302 (ANXA2)|308 (ANXA5)|309 (ANXA6)|633 (BGN)|871 (SERPINH1)|977 (CD151)|1282 (COL4A1)|1285 (COL4A3)|1842 (ECM2)|1893 (ECM1)|2335 (FN1)|2615 (LRRC32)|3339 (HSPG2)|3490 (IGFBP7)|3910 (LAMA4)|3911 (LAMA5)|3912 (LAMB1)|3915 (LAMC1)|4017 (LOXL2)|4059 (BCAM)|4256 (MGP)|4811 (NID1)|4982 (TNFRSF11B)|5265 (SERPINA1)|5269 (SERPINB6)|5272 (SERPINB9)|7041 (TGFB1I1)|7049 (TGFBR3)|7076 (TIMP1)|744…
	EC	GO|GO.BP	GO:0008283	cell proliferation	9.33926e-18	1.0643e-12	110	94 (ACVRL1)|102 (ADAM10)|135 (ADORA2A)|182 (JAG1)|187 (APLNR)|196 (AHR)|301 (ANXA1)|302 (ANXA2)|310 (ANXA7)|666 (BOK)|857 (CAV1)|901 (CCNG2)|947 (CD34)|958 (CD40)|977 (CD151)|1030 (CDKN2B)|1033 (CDKN3)|1163 (CKS1B)|1285 (COL4A3)|1495 (CTNNA1)|1604 (CD55)|1803 (DPP4)|1893 (ECM1)|2012 (EMP1)|2078 (ERG)|2113 (ETS1)|2122 (MECOM)|2149 (F2R)|2296 (FOXC1)|2321 (FLT1)|2324 (FLT4)|2335 (FN1)|2444 (FRK)|26…
	EC	GO|GO.BP	GO:0048870	cell motility	1.14083e-17	1.30008e-12	96	81 (ACTN4)|94 (ACVRL1)|102 (ADAM10)|182 (JAG1)|285 (ANGPT2)|301 (ANXA1)|306 (ANXA3)|308 (ANXA5)|309 (ANXA6)|389 (RHOC)|682 (BSG)|857 (CAV1)|947 (CD34)|958 (CD40)|977 (CD151)|1495 (CTNNA1)|1803 (DPP4)|1893 (ECM1)|1942 (EFNA1)|2022 (ENG)|2050 (EPHB4)|2113 (ETS1)|2149 (F2R)|2296 (FOXC1)|2321 (FLT1)|2324 (FLT4)|2335 (FN1)|2624 (GATA2)|2651 (GCNT2)|2826 (CCR10)|2886 (GRB7)|3315 (HSPB1)|3480 (IGF1R)|35…
	EC	GO|GO.BP	GO:0051674	localization of cell	1.14083e-17	1.30008e-12	96	81 (ACTN4)|94 (ACVRL1)|102 (ADAM10)|182 (JAG1)|285 (ANGPT2)|301 (ANXA1)|306 (ANXA3)|308 (ANXA5)|309 (ANXA6)|389 (RHOC)|682 (BSG)|857 (CAV1)|947 (CD34)|958 (CD40)|977 (CD151)|1495 (CTNNA1)|1803 (DPP4)|1893 (ECM1)|1942 (EFNA1)|2022 (ENG)|2050 (EPHB4)|2113 (ETS1)|2149 (F2R)|2296 (FOXC1)|2321 (FLT1)|2324 (FLT4)|2335 (FN1)|2624 (GATA2)|2651 (GCNT2)|2826 (CCR10)|2886 (GRB7)|3315 (HSPB1)|3480 (IGF1R)|35…
	EC	GO|GO.BP	GO:0050896	response to stimulus	2.0052e-17	2.28512e-12	294	32 (ACACB)|81 (ACTN4)|94 (ACVRL1)|102 (ADAM10)|135 (ADORA2A)|182 (JAG1)|187 (APLNR)|196 (AHR)|285 (ANGPT2)|301 (ANXA1)|302 (ANXA2)|306 (ANXA3)|308 (ANXA5)|309 (ANXA6)|310 (ANXA7)|368 (ABCC6)|389 (RHOC)|666 (BOK)|682 (BSG)|839 (CASP6)|840 (CASP7)|857 (CAV1)|871 (SERPINH1)|947 (CD34)|958 (CD40)|966 (CD59)|977 (CD151)|1003 (CDH5)|1030 (CDKN2B)|1258 (CNGB1)|1282 (COL4A1)|1285 (COL4A3)|1317 (SLC31A1)|…
	EC	GO|GO.BP	GO:0016477	cell migration	2.45365e-17	2.79618e-12	90	81 (ACTN4)|94 (ACVRL1)|102 (ADAM10)|182 (JAG1)|285 (ANGPT2)|301 (ANXA1)|306 (ANXA3)|309 (ANXA6)|389 (RHOC)|682 (BSG)|857 (CAV1)|947 (CD34)|958 (CD40)|977 (CD151)|1803 (DPP4)|1893 (ECM1)|1942 (EFNA1)|2022 (ENG)|2050 (EPHB4)|2113 (ETS1)|2149 (F2R)|2296 (FOXC1)|2321 (FLT1)|2324 (FLT4)|2335 (FN1)|2624 (GATA2)|2651 (GCNT2)|2826 (CCR10)|2886 (GRB7)|3315 (HSPB1)|3480 (IGF1R)|3554 (IL1R1)|3672 (ITGA1)|36…
	EC	GO|GO.BP	GO:0023051	regulation of signaling	1.87013e-16	2.1312e-11	152	81 (ACTN4)|94 (ACVRL1)|135 (ADORA2A)|182 (JAG1)|187 (APLNR)|301 (ANXA1)|302 (ANXA2)|306 (ANXA3)|308 (ANXA5)|389 (RHOC)|666 (BOK)|857 (CAV1)|958 (CD40)|1030 (CDKN2B)|1258 (CNGB1)|1495 (CTNNA1)|1604 (CD55)|1803 (DPP4)|1848 (DUSP6)|1889 (ECE1)|1893 (ECM1)|1942 (EFNA1)|1997 (ELF1)|2022 (ENG)|2050 (EPHB4)|2122 (MECOM)|2149 (F2R)|2321 (FLT1)|2324 (FLT4)|2335 (FN1)|2624 (GATA2)|2651 (GCNT2)|2702 (GJA5)|…
	EC	GO|GO.BP	GO:0042127	regulation of cell proliferation	2.15555e-16	2.45646e-11	93	94 (ACVRL1)|102 (ADAM10)|135 (ADORA2A)|182 (JAG1)|187 (APLNR)|196 (AHR)|301 (ANXA1)|302 (ANXA2)|666 (BOK)|857 (CAV1)|901 (CCNG2)|958 (CD40)|1030 (CDKN2B)|1033 (CDKN3)|1285 (COL4A3)|1495 (CTNNA1)|1604 (CD55)|1803 (DPP4)|1893 (ECM1)|2113 (ETS1)|2149 (F2R)|2321 (FLT1)|2324 (FLT4)|2335 (FN1)|2444 (FRK)|2615 (LRRC32)|2624 (GATA2)|2651 (GCNT2)|2869 (GRK5)|3356 (HTR2A)|3480 (IGF1R)|3490 (IGFBP7)|3672 (I…
	EC	GO|GO.BP	GO:0031589	cell-substrate adhesion	3.05759e-16	3.48442e-11	38	81 (ACTN4)|87 (ACTN1)|94 (ACVRL1)|182 (JAG1)|285 (ANGPT2)|947 (CD34)|1842 (ECM2)|1942 (EFNA1)|2335 (FN1)|2651 (GCNT2)|3672 (ITGA1)|3688 (ITGB1)|3717 (JAK2)|3791 (KDR)|3911 (LAMA5)|3912 (LAMB1)|3915 (LAMC1)|3987 (LIMS1)|4059 (BCAM)|4091 (SMAD6)|4811 (NID1)|5175 (PECAM1)|7010 (TEK)|7074 (TIAM1)|7402 (UTRN)|7448 (VTN)|7450 (VWF)|8174 (MADCAM1)|8322 (FZD4)|8826 (IQGAP1)|10395 (DLC1)|10516 (FBLN5)|227…
	EC	GO|GO.BP	GO:0006928	movement of cell or subcellular component	3.16156e-16	3.60291e-11	108	81 (ACTN4)|87 (ACTN1)|94 (ACVRL1)|102 (ADAM10)|182 (JAG1)|285 (ANGPT2)|301 (ANXA1)|306 (ANXA3)|308 (ANXA5)|309 (ANXA6)|389 (RHOC)|682 (BSG)|857 (CAV1)|947 (CD34)|958 (CD40)|977 (CD151)|1495 (CTNNA1)|1803 (DPP4)|1893 (ECM1)|1942 (EFNA1)|2022 (ENG)|2050 (EPHB4)|2113 (ETS1)|2149 (F2R)|2296 (FOXC1)|2321 (FLT1)|2324 (FLT4)|2335 (FN1)|2624 (GATA2)|2651 (GCNT2)|2702 (GJA5)|2826 (CCR10)|2886 (GRB7)|2887 …
	EC	GO|GO.BP	GO:0010646	regulation of cell communication	4.47803e-16	5.10316e-11	150	81 (ACTN4)|94 (ACVRL1)|135 (ADORA2A)|182 (JAG1)|187 (APLNR)|301 (ANXA1)|306 (ANXA3)|308 (ANXA5)|389 (RHOC)|666 (BOK)|857 (CAV1)|958 (CD40)|1030 (CDKN2B)|1258 (CNGB1)|1495 (CTNNA1)|1604 (CD55)|1803 (DPP4)|1848 (DUSP6)|1893 (ECM1)|1942 (EFNA1)|1997 (ELF1)|2022 (ENG)|2050 (EPHB4)|2122 (MECOM)|2149 (F2R)|2321 (FLT1)|2324 (FLT4)|2335 (FN1)|2624 (GATA2)|2651 (GCNT2)|2702 (GJA5)|2828 (GPR4)|2869 (GRK5)|…
	EC	GO|GO.BP	GO:0009966	regulation of signal transduction	9.51093e-16	1.08387e-10	139	81 (ACTN4)|94 (ACVRL1)|135 (ADORA2A)|182 (JAG1)|187 (APLNR)|306 (ANXA3)|389 (RHOC)|666 (BOK)|857 (CAV1)|958 (CD40)|1030 (CDKN2B)|1258 (CNGB1)|1495 (CTNNA1)|1604 (CD55)|1848 (DUSP6)|1893 (ECM1)|1942 (EFNA1)|1997 (ELF1)|2022 (ENG)|2050 (EPHB4)|2122 (MECOM)|2149 (F2R)|2321 (FLT1)|2324 (FLT4)|2335 (FN1)|2624 (GATA2)|2651 (GCNT2)|2828 (GPR4)|2869 (GRK5)|2886 (GRB7)|2887 (GRB10)|3090 (HIC1)|3315 (HSPB1…
	EC	GO|GO.CC	GO:0005912	adherens junction	1.39008e-15	1.58413e-10	47	81 (ACTN4)|87 (ACTN1)|102 (ADAM10)|182 (JAG1)|301 (ANXA1)|302 (ANXA2)|308 (ANXA5)|309 (ANXA6)|682 (BSG)|857 (CAV1)|966 (CD59)|977 (CD151)|1003 (CDH5)|1495 (CTNNA1)|1803 (DPP4)|2022 (ENG)|2321 (FLT1)|2886 (GRB7)|3315 (HSPB1)|3339 (HSPG2)|3672 (ITGA1)|3688 (ITGB1)|3717 (JAK2)|3987 (LIMS1)|4643 (MYO1E)|5817 (PVR)|6237 (RRAS)|6282 (S100A11)|6645 (SNTB2)|7010 (TEK)|7041 (TGFB1I1)|7431 (VIM)|7525 (YES1…
	EC	GO|GO.BP	GO:0032502	developmental process	1.57007e-15	1.78925e-10	220	32 (ACACB)|81 (ACTN4)|87 (ACTN1)|94 (ACVRL1)|102 (ADAM10)|135 (ADORA2A)|182 (JAG1)|187 (APLNR)|196 (AHR)|285 (ANGPT2)|301 (ANXA1)|302 (ANXA2)|306 (ANXA3)|309 (ANXA6)|310 (ANXA7)|389 (RHOC)|663 (BNIP2)|666 (BOK)|682 (BSG)|839 (CASP6)|857 (CAV1)|871 (SERPINH1)|947 (CD34)|958 (CD40)|977 (CD151)|1003 (CDH5)|1030 (CDKN2B)|1258 (CNGB1)|1282 (COL4A1)|1285 (COL4A3)|1349 (COX7B)|1378 (CR1)|1390 (CREM)|149…
	EC	GO|GO.CC	GO:0070161	anchoring junction	4.26485e-15	4.86023e-10	47	81 (ACTN4)|87 (ACTN1)|102 (ADAM10)|182 (JAG1)|301 (ANXA1)|302 (ANXA2)|308 (ANXA5)|309 (ANXA6)|682 (BSG)|857 (CAV1)|966 (CD59)|977 (CD151)|1003 (CDH5)|1495 (CTNNA1)|1803 (DPP4)|2022 (ENG)|2321 (FLT1)|2886 (GRB7)|3315 (HSPB1)|3339 (HSPG2)|3672 (ITGA1)|3688 (ITGB1)|3717 (JAK2)|3987 (LIMS1)|4643 (MYO1E)|5817 (PVR)|6237 (RRAS)|6282 (S100A11)|6645 (SNTB2)|7010 (TEK)|7041 (TGFB1I1)|7431 (VIM)|7525 (YES1…
	EC	GO|GO.BP	GO:0023052	signaling	1.07497e-14	1.22503e-09	224	81 (ACTN4)|94 (ACVRL1)|102 (ADAM10)|135 (ADORA2A)|182 (JAG1)|187 (APLNR)|196 (AHR)|285 (ANGPT2)|301 (ANXA1)|302 (ANXA2)|306 (ANXA3)|308 (ANXA5)|309 (ANXA6)|389 (RHOC)|666 (BOK)|682 (BSG)|857 (CAV1)|947 (CD34)|958 (CD40)|966 (CD59)|977 (CD151)|1003 (CDH5)|1030 (CDKN2B)|1258 (CNGB1)|1282 (COL4A1)|1285 (COL4A3)|1378 (CR1)|1390 (CREM)|1495 (CTNNA1)|1604 (CD55)|1803 (DPP4)|1848 (DUSP6)|1889 (ECE1)|189…
	EC	GO|GO.BP	GO:0043542	endothelial cell migration	1.08104e-14	1.23196e-09	32	94 (ACVRL1)|285 (ANGPT2)|301 (ANXA1)|306 (ANXA3)|958 (CD40)|1803 (DPP4)|1942 (EFNA1)|2050 (EPHB4)|2113 (ETS1)|2324 (FLT4)|2624 (GATA2)|3315 (HSPB1)|3688 (ITGB1)|3791 (KDR)|4017 (LOXL2)|4846 (NOS3)|5175 (PECAM1)|5547 (PRCP)|5743 (PTGS2)|6781 (STC1)|7010 (TEK)|7424 (VEGFC)|10769 (PLK2)|11235 (PDCD10)|25865 (PRKD2)|29775 (CARD10)|54567 (DLL4)|56999 (ADAMTS9)|57381 (RHOJ)|79812 (MMRN2)|90627 (STARD13…
	EC	GO|GO.BP	GO:0045765	regulation of angiogenesis	1.54008e-14	1.75507e-09	38	94 (ACVRL1)|187 (APLNR)|285 (ANGPT2)|301 (ANXA1)|306 (ANXA3)|947 (CD34)|958 (CD40)|1003 (CDH5)|1285 (COL4A3)|1893 (ECM1)|1942 (EFNA1)|2022 (ENG)|2113 (ETS1)|2296 (FOXC1)|2321 (FLT1)|2624 (GATA2)|2828 (GPR4)|3315 (HSPB1)|3339 (HSPG2)|3688 (ITGB1)|3791 (KDR)|4846 (NOS3)|4881 (NPR1)|5743 (PTGS2)|6237 (RRAS)|7010 (TEK)|7075 (TIE1)|7424 (VEGFC)|10769 (PLK2)|11235 (PDCD10)|25865 (PRKD2)|29775 (CARD10)|…
	EC	GO|GO.BP	GO:0051239	regulation of multicellular organismal process	1.79799e-14	2.04898e-09	133	32 (ACACB)|94 (ACVRL1)|102 (ADAM10)|135 (ADORA2A)|182 (JAG1)|187 (APLNR)|285 (ANGPT2)|301 (ANXA1)|302 (ANXA2)|306 (ANXA3)|308 (ANXA5)|309 (ANXA6)|857 (CAV1)|947 (CD34)|958 (CD40)|1003 (CDH5)|1285 (COL4A3)|1378 (CR1)|1495 (CTNNA1)|1848 (DUSP6)|1889 (ECE1)|1893 (ECM1)|1942 (EFNA1)|1997 (ELF1)|2022 (ENG)|2113 (ETS1)|2149 (F2R)|2296 (FOXC1)|2321 (FLT1)|2324 (FLT4)|2335 (FN1)|2615 (LRRC32)|2624 (GATA2…
	EC	GO|GO.BP	GO:0030198	extracellular matrix organization	2.55153e-14	2.90773e-09	36	102 (ADAM10)|302 (ANXA2)|633 (BGN)|682 (BSG)|871 (SERPINH1)|1282 (COL4A1)|1285 (COL4A3)|1803 (DPP4)|1842 (ECM2)|2022 (ENG)|2113 (ETS1)|2296 (FOXC1)|2335 (FN1)|3339 (HSPG2)|3384 (ICAM2)|3672 (ITGA1)|3688 (ITGB1)|3791 (KDR)|3910 (LAMA4)|3911 (LAMA5)|3912 (LAMB1)|3915 (LAMC1)|4017 (LOXL2)|4643 (MYO1E)|4811 (NID1)|4982 (TNFRSF11B)|5175 (PECAM1)|7076 (TIMP1)|7448 (VTN)|7450 (VWF)|8174 (MADCAM1)|10516 …
	EC	GO|GO.BP	GO:0051716	cellular response to stimulus	2.63156e-14	2.99893e-09	246	81 (ACTN4)|94 (ACVRL1)|102 (ADAM10)|135 (ADORA2A)|182 (JAG1)|187 (APLNR)|196 (AHR)|285 (ANGPT2)|301 (ANXA1)|302 (ANXA2)|306 (ANXA3)|308 (ANXA5)|309 (ANXA6)|389 (RHOC)|666 (BOK)|682 (BSG)|839 (CASP6)|840 (CASP7)|857 (CAV1)|947 (CD34)|958 (CD40)|966 (CD59)|977 (CD151)|1003 (CDH5)|1030 (CDKN2B)|1258 (CNGB1)|1282 (COL4A1)|1285 (COL4A3)|1317 (SLC31A1)|1378 (CR1)|1390 (CREM)|1495 (CTNNA1)|1604 (CD55)|1…
	EC	GO|GO.BP	GO:0030335	positive regulation of cell migration	4.20274e-14	4.78944e-09	44	81 (ACTN4)|102 (ADAM10)|301 (ANXA1)|306 (ANXA3)|389 (RHOC)|857 (CAV1)|958 (CD40)|977 (CD151)|2113 (ETS1)|2149 (F2R)|2321 (FLT1)|2324 (FLT4)|2335 (FN1)|2624 (GATA2)|2651 (GCNT2)|2886 (GRB7)|3315 (HSPB1)|3480 (IGF1R)|3554 (IL1R1)|3717 (JAK2)|3791 (KDR)|3912 (LAMB1)|4254 (KITLG)|4638 (MYLK)|4846 (NOS3)|5420 (PODXL)|5743 (PTGS2)|5979 (RET)|6591 (SNAI2)|7010 (TEK)|7074 (TIAM1)|7424 (VEGFC)|7448 (VTN)|…
	EC	GO|GO.BP	GO:0010033	response to organic substance	5.4526e-14	6.21378e-09	134	32 (ACACB)|94 (ACVRL1)|102 (ADAM10)|135 (ADORA2A)|182 (JAG1)|196 (AHR)|285 (ANGPT2)|301 (ANXA1)|302 (ANXA2)|306 (ANXA3)|308 (ANXA5)|310 (ANXA7)|666 (BOK)|682 (BSG)|839 (CASP6)|840 (CASP7)|857 (CAV1)|871 (SERPINH1)|958 (CD40)|1003 (CDH5)|1030 (CDKN2B)|1282 (COL4A1)|1285 (COL4A3)|1495 (CTNNA1)|1604 (CD55)|1848 (DUSP6)|1893 (ECM1)|1997 (ELF1)|2022 (ENG)|2113 (ETS1)|2149 (F2R)|2296 (FOXC1)|2321 (FLT1…
	EC	GO|GO.BP	GO:0048856	anatomical structure development	6.15261e-14	7.01152e-09	205	32 (ACACB)|81 (ACTN4)|87 (ACTN1)|94 (ACVRL1)|102 (ADAM10)|135 (ADORA2A)|182 (JAG1)|187 (APLNR)|196 (AHR)|285 (ANGPT2)|301 (ANXA1)|302 (ANXA2)|306 (ANXA3)|309 (ANXA6)|310 (ANXA7)|389 (RHOC)|663 (BNIP2)|666 (BOK)|682 (BSG)|839 (CASP6)|857 (CAV1)|871 (SERPINH1)|947 (CD34)|958 (CD40)|977 (CD151)|1003 (CDH5)|1030 (CDKN2B)|1258 (CNGB1)|1282 (COL4A1)|1285 (COL4A3)|1349 (COX7B)|1378 (CR1)|1390 (CREM)|149…
	EC	GO|GO.BP	GO:0050793	regulation of developmental process	6.81152e-14	7.76241e-09	117	32 (ACACB)|81 (ACTN4)|94 (ACVRL1)|102 (ADAM10)|182 (JAG1)|187 (APLNR)|285 (ANGPT2)|301 (ANXA1)|302 (ANXA2)|306 (ANXA3)|310 (ANXA7)|389 (RHOC)|663 (BNIP2)|857 (CAV1)|947 (CD34)|958 (CD40)|1003 (CDH5)|1285 (COL4A3)|1378 (CR1)|1495 (CTNNA1)|1848 (DUSP6)|1893 (ECM1)|1942 (EFNA1)|2022 (ENG)|2113 (ETS1)|2296 (FOXC1)|2321 (FLT1)|2324 (FLT4)|2335 (FN1)|2624 (GATA2)|2651 (GCNT2)|2828 (GPR4)|3315 (HSPB1)|3…
	EC	GO|GO.BP	GO:0022603	regulation of anatomical structure morphogenesis	8.22095e-14	9.3686e-09	67	81 (ACTN4)|94 (ACVRL1)|102 (ADAM10)|182 (JAG1)|187 (APLNR)|285 (ANGPT2)|301 (ANXA1)|306 (ANXA3)|310 (ANXA7)|389 (RHOC)|947 (CD34)|958 (CD40)|1003 (CDH5)|1285 (COL4A3)|1893 (ECM1)|1942 (EFNA1)|2022 (ENG)|2113 (ETS1)|2296 (FOXC1)|2321 (FLT1)|2324 (FLT4)|2335 (FN1)|2624 (GATA2)|2828 (GPR4)|3315 (HSPB1)|3339 (HSPG2)|3688 (ITGB1)|3791 (KDR)|3987 (LIMS1)|4487 (MSX1)|4628 (MYH10)|4846 (NOS3)|4881 (NPR1)…
	EC	GO|GO.BP	GO:0043062	extracellular structure organization	8.51355e-14	9.70205e-09	38	102 (ADAM10)|302 (ANXA2)|633 (BGN)|682 (BSG)|871 (SERPINH1)|947 (CD34)|1282 (COL4A1)|1285 (COL4A3)|1803 (DPP4)|1842 (ECM2)|2022 (ENG)|2113 (ETS1)|2296 (FOXC1)|2335 (FN1)|3339 (HSPG2)|3384 (ICAM2)|3672 (ITGA1)|3688 (ITGB1)|3791 (KDR)|3910 (LAMA4)|3911 (LAMA5)|3912 (LAMB1)|3915 (LAMC1)|4017 (LOXL2)|4643 (MYO1E)|4811 (NID1)|4982 (TNFRSF11B)|5175 (PECAM1)|5360 (PLTP)|7076 (TIMP1)|7448 (VTN)|7450 (VWF…
	EC	GO|GO.MF	GO:0005201	extracellular matrix structural constituent	9.32263e-14	1.06241e-08	24	633 (BGN)|1282 (COL4A1)|1285 (COL4A3)|1893 (ECM1)|2335 (FN1)|3339 (HSPG2)|3490 (IGFBP7)|3910 (LAMA4)|3911 (LAMA5)|3912 (LAMB1)|3915 (LAMC1)|4256 (MGP)|4811 (NID1)|7448 (VTN)|7450 (VWF)|10516 (FBLN5)|22795 (NID2)|22915 (MMRN1)|64129 (TINAGL1)|64856 (VWA1)|79812 (MMRN2)|83872 (HMCN1)|115908 (CTHRC1)|340267 (COL28A1)
	EC	GO|GO.BP	GO:0051179	localization	9.43941e-14	1.07572e-08	223	32 (ACACB)|81 (ACTN4)|87 (ACTN1)|94 (ACVRL1)|102 (ADAM10)|135 (ADORA2A)|182 (JAG1)|187 (APLNR)|285 (ANGPT2)|301 (ANXA1)|302 (ANXA2)|306 (ANXA3)|308 (ANXA5)|309 (ANXA6)|368 (ABCC6)|389 (RHOC)|666 (BOK)|682 (BSG)|689 (BTF3)|762 (CA4)|857 (CAV1)|947 (CD34)|958 (CD40)|966 (CD59)|977 (CD151)|1258 (CNGB1)|1317 (SLC31A1)|1349 (COX7B)|1378 (CR1)|1495 (CTNNA1)|1604 (CD55)|1803 (DPP4)|1893 (ECM1)|1942 (EFN…
	EC	GO|GO.BP	GO:0007154	cell communication	1.08015e-13	1.23094e-08	222	81 (ACTN4)|94 (ACVRL1)|102 (ADAM10)|135 (ADORA2A)|182 (JAG1)|187 (APLNR)|196 (AHR)|285 (ANGPT2)|301 (ANXA1)|302 (ANXA2)|306 (ANXA3)|308 (ANXA5)|309 (ANXA6)|389 (RHOC)|666 (BOK)|682 (BSG)|857 (CAV1)|947 (CD34)|958 (CD40)|966 (CD59)|977 (CD151)|1003 (CDH5)|1030 (CDKN2B)|1258 (CNGB1)|1282 (COL4A1)|1285 (COL4A3)|1378 (CR1)|1390 (CREM)|1495 (CTNNA1)|1604 (CD55)|1803 (DPP4)|1848 (DUSP6)|1893 (ECM1)|194…
	EC	GO|GO.BP	GO:0048518	positive regulation of biological process	1.41567e-13	1.61329e-08	210	32 (ACACB)|81 (ACTN4)|87 (ACTN1)|94 (ACVRL1)|102 (ADAM10)|135 (ADORA2A)|182 (JAG1)|187 (APLNR)|196 (AHR)|285 (ANGPT2)|301 (ANXA1)|302 (ANXA2)|306 (ANXA3)|308 (ANXA5)|389 (RHOC)|663 (BNIP2)|666 (BOK)|857 (CAV1)|901 (CCNG2)|947 (CD34)|958 (CD40)|966 (CD59)|977 (CD151)|1003 (CDH5)|1030 (CDKN2B)|1163 (CKS1B)|1285 (COL4A3)|1378 (CR1)|1390 (CREM)|1495 (CTNNA1)|1604 (CD55)|1803 (DPP4)|1842 (ECM2)|1848 (…
	EC	GO|GO.BP	GO:0009888	tissue development	1.50751e-13	1.71795e-08	96	94 (ACVRL1)|182 (JAG1)|301 (ANXA1)|302 (ANXA2)|309 (ANXA6)|310 (ANXA7)|389 (RHOC)|682 (BSG)|839 (CASP6)|857 (CAV1)|871 (SERPINH1)|947 (CD34)|977 (CD151)|1003 (CDH5)|1282 (COL4A1)|1893 (ECM1)|1942 (EFNA1)|2012 (EMP1)|2022 (ENG)|2296 (FOXC1)|2335 (FN1)|2651 (GCNT2)|2701 (GJA4)|2702 (GJA5)|2828 (GPR4)|3688 (ITGB1)|3714 (JAG2)|3717 (JAK2)|3791 (KDR)|3911 (LAMA5)|3912 (LAMB1)|3915 (LAMC1)|4017 (LOXL2)…
	EC	GO|GO.BP	GO:2000147	positive regulation of cell motility	1.58232e-13	1.80321e-08	44	81 (ACTN4)|102 (ADAM10)|301 (ANXA1)|306 (ANXA3)|389 (RHOC)|857 (CAV1)|958 (CD40)|977 (CD151)|2113 (ETS1)|2149 (F2R)|2321 (FLT1)|2324 (FLT4)|2335 (FN1)|2624 (GATA2)|2651 (GCNT2)|2886 (GRB7)|3315 (HSPB1)|3480 (IGF1R)|3554 (IL1R1)|3717 (JAK2)|3791 (KDR)|3912 (LAMB1)|4254 (KITLG)|4638 (MYLK)|4846 (NOS3)|5420 (PODXL)|5743 (PTGS2)|5979 (RET)|6591 (SNAI2)|7010 (TEK)|7074 (TIAM1)|7424 (VEGFC)|7448 (VTN)|…
	EC	GO|GO.CC	GO:0005604	basement membrane	1.70096e-13	1.93841e-08	19	302 (ANXA2)|977 (CD151)|1282 (COL4A1)|1285 (COL4A3)|2335 (FN1)|3339 (HSPG2)|3910 (LAMA4)|3911 (LAMA5)|3912 (LAMB1)|3915 (LAMC1)|4017 (LOXL2)|4811 (NID1)|7076 (TIMP1)|7448 (VTN)|22795 (NID2)|64856 (VWA1)|79812 (MMRN2)|83872 (HMCN1)|340267 (COL28A1)
	EC	GO|GO.BP	GO:0001667	ameboidal-type cell migration	2.13661e-13	2.43488e-08	40	94 (ACVRL1)|285 (ANGPT2)|301 (ANXA1)|306 (ANXA3)|309 (ANXA6)|958 (CD40)|1803 (DPP4)|1942 (EFNA1)|2050 (EPHB4)|2113 (ETS1)|2324 (FLT4)|2624 (GATA2)|3315 (HSPB1)|3688 (ITGB1)|3791 (KDR)|3911 (LAMA5)|4017 (LOXL2)|4254 (KITLG)|4846 (NOS3)|5175 (PECAM1)|5547 (PRCP)|5743 (PTGS2)|5979 (RET)|6781 (STC1)|7010 (TEK)|7076 (TIMP1)|7424 (VEGFC)|8482 (SEMA7A)|10769 (PLK2)|11235 (PDCD10)|25865 (PRKD2)|29775 (CA…
	EC	GO|GO.CC	GO:0031982	vesicle	2.48786e-13	2.83517e-08	151	81 (ACTN4)|87 (ACTN1)|102 (ADAM10)|301 (ANXA1)|302 (ANXA2)|306 (ANXA3)|308 (ANXA5)|309 (ANXA6)|310 (ANXA7)|389 (RHOC)|419 (ART3)|633 (BGN)|666 (BOK)|682 (BSG)|762 (CA4)|822 (CAPG)|857 (CAV1)|958 (CD40)|966 (CD59)|1258 (CNGB1)|1317 (SLC31A1)|1378 (CR1)|1495 (CTNNA1)|1604 (CD55)|1803 (DPP4)|1889 (ECE1)|1893 (ECM1)|2050 (EPHB4)|2149 (F2R)|2321 (FLT1)|2335 (FN1)|2444 (FRK)|2632 (GBE1)|3251 (HPRT1)|33…
	EC	GO|GO.MF	GO:0005515	protein binding	2.71113e-13	3.0896e-08	337	32 (ACACB)|81 (ACTN4)|87 (ACTN1)|94 (ACVRL1)|102 (ADAM10)|135 (ADORA2A)|182 (JAG1)|196 (AHR)|285 (ANGPT2)|301 (ANXA1)|302 (ANXA2)|306 (ANXA3)|308 (ANXA5)|309 (ANXA6)|310 (ANXA7)|389 (RHOC)|663 (BNIP2)|666 (BOK)|682 (BSG)|689 (BTF3)|762 (CA4)|822 (CAPG)|831 (CAST)|839 (CASP6)|840 (CASP7)|857 (CAV1)|871 (SERPINH1)|901 (CCNG2)|947 (CD34)|958 (CD40)|966 (CD59)|977 (CD151)|1003 (CDH5)|1030 (CDKN2B)|10…
	EC	GO|GO.CC	GO:0030054	cell junction	2.89848e-13	3.3031e-08	72	81 (ACTN4)|87 (ACTN1)|102 (ADAM10)|182 (JAG1)|301 (ANXA1)|302 (ANXA2)|308 (ANXA5)|309 (ANXA6)|682 (BSG)|857 (CAV1)|966 (CD59)|977 (CD151)|1003 (CDH5)|1495 (CTNNA1)|1803 (DPP4)|2022 (ENG)|2321 (FLT1)|2701 (GJA4)|2702 (GJA5)|2886 (GRB7)|3315 (HSPB1)|3339 (HSPG2)|3672 (ITGA1)|3688 (ITGB1)|3717 (JAK2)|3759 (KCNJ2)|3791 (KDR)|3987 (LIMS1)|4643 (MYO1E)|4690 (NCK1)|5097 (PCDH1)|5175 (PECAM1)|5420 (PODXL…
	EC	GO|GO.BP	GO:0007166	cell surface receptor signaling pathway	3.52442e-13	4.01643e-08	126	94 (ACVRL1)|102 (ADAM10)|135 (ADORA2A)|182 (JAG1)|285 (ANGPT2)|301 (ANXA1)|302 (ANXA2)|306 (ANXA3)|666 (BOK)|682 (BSG)|857 (CAV1)|958 (CD40)|966 (CD59)|977 (CD151)|1003 (CDH5)|1030 (CDKN2B)|1282 (COL4A1)|1285 (COL4A3)|1378 (CR1)|1495 (CTNNA1)|1604 (CD55)|1893 (ECM1)|1942 (EFNA1)|1997 (ELF1)|2022 (ENG)|2050 (EPHB4)|2296 (FOXC1)|2321 (FLT1)|2324 (FLT4)|2335 (FN1)|2444 (FRK)|2615 (LRRC32)|2624 (GATA…
	EC	GO|GO.BP	GO:1901342	regulation of vasculature development	3.62169e-13	4.12727e-08	38	94 (ACVRL1)|187 (APLNR)|285 (ANGPT2)|301 (ANXA1)|306 (ANXA3)|947 (CD34)|958 (CD40)|1003 (CDH5)|1285 (COL4A3)|1893 (ECM1)|1942 (EFNA1)|2022 (ENG)|2113 (ETS1)|2296 (FOXC1)|2321 (FLT1)|2624 (GATA2)|2828 (GPR4)|3315 (HSPB1)|3339 (HSPG2)|3688 (ITGB1)|3791 (KDR)|4846 (NOS3)|4881 (NPR1)|5743 (PTGS2)|6237 (RRAS)|7010 (TEK)|7075 (TIE1)|7424 (VEGFC)|10769 (PLK2)|11235 (PDCD10)|25865 (PRKD2)|29775 (CARD10)|…
	EC	GO|GO.MF	GO:0050839	cell adhesion molecule binding	3.82185e-13	4.35539e-08	41	81 (ACTN4)|87 (ACTN1)|102 (ADAM10)|301 (ANXA1)|302 (ANXA2)|310 (ANXA7)|682 (BSG)|822 (CAPG)|831 (CAST)|977 (CD151)|1003 (CDH5)|1285 (COL4A3)|1495 (CTNNA1)|1842 (ECM2)|2335 (FN1)|3384 (ICAM2)|3646 (EIF3E)|3688 (ITGB1)|3791 (KDR)|3911 (LAMA5)|4690 (NCK1)|5817 (PVR)|6282 (S100A11)|7402 (UTRN)|7448 (VTN)|7450 (VWF)|7706 (TRIM25)|8174 (MADCAM1)|8482 (SEMA7A)|8826 (IQGAP1)|10516 (FBLN5)|11095 (ADAMTS8)…
	EC	GO|GO.BP	GO:0051272	positive regulation of cellular component movement	3.84685e-13	4.38387e-08	44	81 (ACTN4)|102 (ADAM10)|301 (ANXA1)|306 (ANXA3)|389 (RHOC)|857 (CAV1)|958 (CD40)|977 (CD151)|2113 (ETS1)|2149 (F2R)|2321 (FLT1)|2324 (FLT4)|2335 (FN1)|2624 (GATA2)|2651 (GCNT2)|2886 (GRB7)|3315 (HSPB1)|3480 (IGF1R)|3554 (IL1R1)|3717 (JAK2)|3791 (KDR)|3912 (LAMB1)|4254 (KITLG)|4638 (MYLK)|4846 (NOS3)|5420 (PODXL)|5743 (PTGS2)|5979 (RET)|6591 (SNAI2)|7010 (TEK)|7074 (TIAM1)|7424 (VEGFC)|7448 (VTN)|…
	EC	GO|GO.BP	GO:0007165	signal transduction	3.90876e-13	4.45442e-08	208	81 (ACTN4)|94 (ACVRL1)|102 (ADAM10)|135 (ADORA2A)|182 (JAG1)|187 (APLNR)|196 (AHR)|285 (ANGPT2)|301 (ANXA1)|302 (ANXA2)|306 (ANXA3)|308 (ANXA5)|309 (ANXA6)|389 (RHOC)|666 (BOK)|682 (BSG)|857 (CAV1)|947 (CD34)|958 (CD40)|966 (CD59)|977 (CD151)|1003 (CDH5)|1030 (CDKN2B)|1258 (CNGB1)|1282 (COL4A1)|1285 (COL4A3)|1378 (CR1)|1390 (CREM)|1495 (CTNNA1)|1604 (CD55)|1848 (DUSP6)|1893 (ECM1)|1942 (EFNA1)|19…
	EC	GO|GO.BP	GO:0040017	positive regulation of locomotion	1.08573e-12	1.23729e-07	44	81 (ACTN4)|102 (ADAM10)|301 (ANXA1)|306 (ANXA3)|389 (RHOC)|857 (CAV1)|958 (CD40)|977 (CD151)|2113 (ETS1)|2149 (F2R)|2321 (FLT1)|2324 (FLT4)|2335 (FN1)|2624 (GATA2)|2651 (GCNT2)|2886 (GRB7)|3315 (HSPB1)|3480 (IGF1R)|3554 (IL1R1)|3717 (JAK2)|3791 (KDR)|3912 (LAMB1)|4254 (KITLG)|4638 (MYLK)|4846 (NOS3)|5420 (PODXL)|5743 (PTGS2)|5979 (RET)|6591 (SNAI2)|7010 (TEK)|7074 (TIAM1)|7424 (VEGFC)|7448 (VTN)|…
	EC	GO|GO.BP	GO:0006950	response to stress	1.10036e-12	1.25397e-07	151	81 (ACTN4)|94 (ACVRL1)|135 (ADORA2A)|285 (ANGPT2)|301 (ANXA1)|302 (ANXA2)|306 (ANXA3)|308 (ANXA5)|310 (ANXA7)|389 (RHOC)|666 (BOK)|857 (CAV1)|871 (SERPINH1)|947 (CD34)|958 (CD40)|966 (CD59)|977 (CD151)|1003 (CDH5)|1378 (CR1)|1495 (CTNNA1)|1604 (CD55)|1803 (DPP4)|1848 (DUSP6)|1893 (ECM1)|2113 (ETS1)|2122 (MECOM)|2149 (F2R)|2324 (FLT4)|2335 (FN1)|2624 (GATA2)|2634 (GBP2)|2701 (GJA4)|2828 (GPR4)|309…
	EC	GO|GO.CC	GO:0005911	cell-cell junction	1.62558e-12	1.85251e-07	38	81 (ACTN4)|87 (ACTN1)|301 (ANXA1)|302 (ANXA2)|1003 (CDH5)|1495 (CTNNA1)|1803 (DPP4)|2701 (GJA4)|2702 (GJA5)|3688 (ITGB1)|3759 (KCNJ2)|3987 (LIMS1)|4643 (MYO1E)|4690 (NCK1)|5097 (PCDH1)|5175 (PECAM1)|5420 (PODXL)|5817 (PVR)|6282 (S100A11)|6513 (SLC2A1)|7010 (TEK)|7074 (TIAM1)|7122 (CLDN5)|8322 (FZD4)|8826 (IQGAP1)|23586 (DDX58)|29766 (TMOD3)|51599 (LSR)|57477 (SHROOM4)|57493 (HEG1)|79026 (AHNAK)|8…
	EC	GO|GO.CC	GO:0005925	focal adhesion	1.95643e-12	2.22954e-07	36	81 (ACTN4)|87 (ACTN1)|102 (ADAM10)|301 (ANXA1)|308 (ANXA5)|309 (ANXA6)|682 (BSG)|857 (CAV1)|966 (CD59)|977 (CD151)|1495 (CTNNA1)|1803 (DPP4)|2022 (ENG)|2321 (FLT1)|2886 (GRB7)|3315 (HSPB1)|3339 (HSPG2)|3672 (ITGA1)|3688 (ITGB1)|3717 (JAK2)|3987 (LIMS1)|5817 (PVR)|6237 (RRAS)|6645 (SNTB2)|7010 (TEK)|7041 (TGFB1I1)|7431 (VIM)|7525 (YES1)|8826 (IQGAP1)|9590 (AKAP12)|10094 (ARPC3)|10395 (DLC1)|10544 …
	EC	GO|GO.BP	GO:0032879	regulation of localization	2.37424e-12	2.70568e-07	117	32 (ACACB)|81 (ACTN4)|87 (ACTN1)|94 (ACVRL1)|102 (ADAM10)|135 (ADORA2A)|182 (JAG1)|187 (APLNR)|285 (ANGPT2)|301 (ANXA1)|302 (ANXA2)|306 (ANXA3)|308 (ANXA5)|309 (ANXA6)|389 (RHOC)|666 (BOK)|857 (CAV1)|947 (CD34)|958 (CD40)|977 (CD151)|1495 (CTNNA1)|1803 (DPP4)|1893 (ECM1)|1942 (EFNA1)|2022 (ENG)|2113 (ETS1)|2149 (F2R)|2321 (FLT1)|2324 (FLT4)|2335 (FN1)|2615 (LRRC32)|2624 (GATA2)|2651 (GCNT2)|2702 …
	EC	GO|GO.CC	GO:0005924	cell-substrate adherens junction	2.43325e-12	2.77293e-07	36	81 (ACTN4)|87 (ACTN1)|102 (ADAM10)|301 (ANXA1)|308 (ANXA5)|309 (ANXA6)|682 (BSG)|857 (CAV1)|966 (CD59)|977 (CD151)|1495 (CTNNA1)|1803 (DPP4)|2022 (ENG)|2321 (FLT1)|2886 (GRB7)|3315 (HSPB1)|3339 (HSPG2)|3672 (ITGA1)|3688 (ITGB1)|3717 (JAK2)|3987 (LIMS1)|5817 (PVR)|6237 (RRAS)|6645 (SNTB2)|7010 (TEK)|7041 (TGFB1I1)|7431 (VIM)|7525 (YES1)|8826 (IQGAP1)|9590 (AKAP12)|10094 (ARPC3)|10395 (DLC1)|10544 …
	EC	GO|GO.CC	GO:0009986	cell surface	2.86923e-12	3.26977e-07	55	94 (ACVRL1)|102 (ADAM10)|301 (ANXA1)|302 (ANXA2)|308 (ANXA5)|633 (BGN)|762 (CA4)|947 (CD34)|958 (CD40)|966 (CD59)|977 (CD151)|1003 (CDH5)|1378 (CR1)|1604 (CD55)|1803 (DPP4)|1889 (ECE1)|2022 (ENG)|2149 (F2R)|2615 (LRRC32)|2826 (CCR10)|3554 (IL1R1)|3672 (ITGA1)|3688 (ITGB1)|3953 (LEPR)|4059 (BCAM)|5175 (PECAM1)|5243 (ABCB1)|5738 (PTGFRN)|5817 (PVR)|7010 (TEK)|7035 (TFPI)|7037 (TFRC)|7049 (TGFBR3)|7…
	EC	GO|GO.BP	GO:0010631	epithelial cell migration	3.04304e-12	3.46785e-07	33	94 (ACVRL1)|285 (ANGPT2)|301 (ANXA1)|306 (ANXA3)|958 (CD40)|1803 (DPP4)|1942 (EFNA1)|2050 (EPHB4)|2113 (ETS1)|2324 (FLT4)|2624 (GATA2)|3315 (HSPB1)|3688 (ITGB1)|3791 (KDR)|4017 (LOXL2)|4846 (NOS3)|5175 (PECAM1)|5547 (PRCP)|5743 (PTGS2)|6781 (STC1)|7010 (TEK)|7424 (VEGFC)|10769 (PLK2)|11235 (PDCD10)|25865 (PRKD2)|29775 (CARD10)|29941 (PKN3)|54567 (DLL4)|56999 (ADAMTS9)|57381 (RHOJ)|79812 (MMRN2)|9…
	EC	GO|GO.CC	GO:0030055	cell-substrate junction	3.24357e-12	3.69637e-07	36	81 (ACTN4)|87 (ACTN1)|102 (ADAM10)|301 (ANXA1)|308 (ANXA5)|309 (ANXA6)|682 (BSG)|857 (CAV1)|966 (CD59)|977 (CD151)|1495 (CTNNA1)|1803 (DPP4)|2022 (ENG)|2321 (FLT1)|2886 (GRB7)|3315 (HSPB1)|3339 (HSPG2)|3672 (ITGA1)|3688 (ITGB1)|3717 (JAK2)|3987 (LIMS1)|5817 (PVR)|6237 (RRAS)|6645 (SNTB2)|7010 (TEK)|7041 (TGFB1I1)|7431 (VIM)|7525 (YES1)|8826 (IQGAP1)|9590 (AKAP12)|10094 (ARPC3)|10395 (DLC1)|10544 …
	EC	GO|GO.BP	GO:0043534	blood vessel endothelial cell migration	3.36497e-12	3.83472e-07	24	94 (ACVRL1)|285 (ANGPT2)|301 (ANXA1)|958 (CD40)|1942 (EFNA1)|2050 (EPHB4)|2113 (ETS1)|2624 (GATA2)|3315 (HSPB1)|3688 (ITGB1)|3791 (KDR)|4846 (NOS3)|5547 (PRCP)|5743 (PTGS2)|7424 (VEGFC)|10769 (PLK2)|11235 (PDCD10)|25865 (PRKD2)|29775 (CARD10)|54567 (DLL4)|57381 (RHOJ)|79812 (MMRN2)|90627 (STARD13)|161198 (CLEC14A)
	EC	GO|GO.CC	GO:0016020	membrane	3.36645e-12	3.83641e-07	285	32 (ACACB)|87 (ACTN1)|94 (ACVRL1)|102 (ADAM10)|125 (ADH1B)|135 (ADORA2A)|182 (JAG1)|187 (APLNR)|285 (ANGPT2)|301 (ANXA1)|302 (ANXA2)|306 (ANXA3)|308 (ANXA5)|309 (ANXA6)|310 (ANXA7)|368 (ABCC6)|389 (RHOC)|419 (ART3)|633 (BGN)|666 (BOK)|682 (BSG)|762 (CA4)|831 (CAST)|857 (CAV1)|871 (SERPINH1)|947 (CD34)|958 (CD40)|966 (CD59)|977 (CD151)|1003 (CDH5)|1258 (CNGB1)|1317 (SLC31A1)|1349 (COX7B)|1378 (CR1…
	EC	GO|GO.BP	GO:0042060	wound healing	3.42779e-12	3.90631e-07	42	94 (ACVRL1)|135 (ADORA2A)|301 (ANXA1)|302 (ANXA2)|308 (ANXA5)|389 (RHOC)|857 (CAV1)|947 (CD34)|958 (CD40)|966 (CD59)|977 (CD151)|2113 (ETS1)|2149 (F2R)|2335 (FN1)|2624 (GATA2)|2828 (GPR4)|3315 (HSPB1)|3708 (ITPR1)|3717 (JAK2)|4628 (MYH10)|4638 (MYLK)|4846 (NOS3)|5175 (PECAM1)|5265 (SERPINA1)|5547 (PRCP)|5583 (PRKCH)|7035 (TFPI)|7056 (THBD)|7076 (TIMP1)|7448 (VTN)|7450 (VWF)|8323 (FZD6)|10544 (PRO…
	EC	GO|GO.BP	GO:0090132	epithelium migration	3.85644e-12	4.3948e-07	33	94 (ACVRL1)|285 (ANGPT2)|301 (ANXA1)|306 (ANXA3)|958 (CD40)|1803 (DPP4)|1942 (EFNA1)|2050 (EPHB4)|2113 (ETS1)|2324 (FLT4)|2624 (GATA2)|3315 (HSPB1)|3688 (ITGB1)|3791 (KDR)|4017 (LOXL2)|4846 (NOS3)|5175 (PECAM1)|5547 (PRCP)|5743 (PTGS2)|6781 (STC1)|7010 (TEK)|7424 (VEGFC)|10769 (PLK2)|11235 (PDCD10)|25865 (PRKD2)|29775 (CARD10)|29941 (PKN3)|54567 (DLL4)|56999 (ADAMTS9)|57381 (RHOJ)|79812 (MMRN2)|9…
	EC	GO|GO.BP	GO:0045766	positive regulation of angiogenesis	3.97178e-12	4.52624e-07	25	94 (ACVRL1)|187 (APLNR)|285 (ANGPT2)|301 (ANXA1)|306 (ANXA3)|947 (CD34)|958 (CD40)|1003 (CDH5)|1893 (ECM1)|2022 (ENG)|2113 (ETS1)|2321 (FLT1)|2624 (GATA2)|3315 (HSPB1)|3688 (ITGB1)|3791 (KDR)|4846 (NOS3)|5743 (PTGS2)|6237 (RRAS)|7010 (TEK)|7424 (VEGFC)|10769 (PLK2)|25865 (PRKD2)|51129 (ANGPTL4)|57381 (RHOJ)
	EC	GO|GO.BP	GO:0034329	cell junction assembly	5.52212e-12	6.29301e-07	27	81 (ACTN4)|87 (ACTN1)|94 (ACVRL1)|389 (RHOC)|857 (CAV1)|977 (CD151)|1003 (CDH5)|1495 (CTNNA1)|2335 (FN1)|2701 (GJA4)|2702 (GJA5)|3791 (KDR)|3911 (LAMA5)|3915 (LAMC1)|3987 (LIMS1)|5583 (PRKCH)|6591 (SNAI2)|7010 (TEK)|7122 (CLDN5)|8826 (IQGAP1)|10395 (DLC1)|29984 (RHOD)|51599 (LSR)|57493 (HEG1)|143098 (MPP7)|153562 (MARVELD2)|100506658 (OCLN)
	EC	GO|GO.BP	GO:0003158	endothelium development	5.91467e-12	6.74036e-07	20	94 (ACVRL1)|182 (JAG1)|302 (ANXA2)|947 (CD34)|1003 (CDH5)|2022 (ENG)|2701 (GJA4)|2702 (GJA5)|3791 (KDR)|3911 (LAMA5)|5175 (PECAM1)|6781 (STC1)|7122 (CLDN5)|25865 (PRKD2)|30061 (SLC40A1)|57493 (HEG1)|64321 (SOX17)|81575 (APOLD1)|90627 (STARD13)|153562 (MARVELD2)
	EC	GO|GO.BP	GO:0090130	tissue migration	6.14412e-12	7.00184e-07	33	94 (ACVRL1)|285 (ANGPT2)|301 (ANXA1)|306 (ANXA3)|958 (CD40)|1803 (DPP4)|1942 (EFNA1)|2050 (EPHB4)|2113 (ETS1)|2324 (FLT4)|2624 (GATA2)|3315 (HSPB1)|3688 (ITGB1)|3791 (KDR)|4017 (LOXL2)|4846 (NOS3)|5175 (PECAM1)|5547 (PRCP)|5743 (PTGS2)|6781 (STC1)|7010 (TEK)|7424 (VEGFC)|10769 (PLK2)|11235 (PDCD10)|25865 (PRKD2)|29775 (CARD10)|29941 (PKN3)|54567 (DLL4)|56999 (ADAMTS9)|57381 (RHOJ)|79812 (MMRN2)|9…
	EC	GO|GO.BP	GO:0007160	cell-matrix adhesion	6.63265e-12	7.55856e-07	26	87 (ACTN1)|94 (ACVRL1)|182 (JAG1)|947 (CD34)|1842 (ECM2)|2335 (FN1)|3672 (ITGA1)|3688 (ITGB1)|3791 (KDR)|3911 (LAMA5)|3987 (LIMS1)|4059 (BCAM)|4811 (NID1)|5175 (PECAM1)|7010 (TEK)|7074 (TIAM1)|7402 (UTRN)|7448 (VTN)|8174 (MADCAM1)|8826 (IQGAP1)|10395 (DLC1)|10516 (FBLN5)|22795 (NID2)|29984 (RHOD)|56999 (ADAMTS9)|340485 (ACER2)
	EC	GO|GO.BP	GO:0010594	regulation of endothelial cell migration	6.63265e-12	7.55856e-07	26	94 (ACVRL1)|285 (ANGPT2)|301 (ANXA1)|306 (ANXA3)|958 (CD40)|1942 (EFNA1)|2113 (ETS1)|2324 (FLT4)|2624 (GATA2)|3315 (HSPB1)|3791 (KDR)|4846 (NOS3)|5547 (PRCP)|5743 (PTGS2)|6781 (STC1)|7010 (TEK)|7424 (VEGFC)|10769 (PLK2)|11235 (PDCD10)|25865 (PRKD2)|29775 (CARD10)|54567 (DLL4)|56999 (ADAMTS9)|57381 (RHOJ)|79812 (MMRN2)|90627 (STARD13)
	EC	GO|GO.BP	GO:0070887	cellular response to chemical stimulus	8.15019e-12	9.28795e-07	127	94 (ACVRL1)|102 (ADAM10)|196 (AHR)|285 (ANGPT2)|301 (ANXA1)|302 (ANXA2)|308 (ANXA5)|666 (BOK)|839 (CASP6)|840 (CASP7)|857 (CAV1)|947 (CD34)|958 (CD40)|1003 (CDH5)|1030 (CDKN2B)|1282 (COL4A1)|1317 (SLC31A1)|1495 (CTNNA1)|1604 (CD55)|1893 (ECM1)|1997 (ELF1)|2022 (ENG)|2113 (ETS1)|2296 (FOXC1)|2321 (FLT1)|2324 (FLT4)|2335 (FN1)|2615 (LRRC32)|2634 (GBP2)|2651 (GCNT2)|2826 (CCR10)|2887 (GRB10)|3315 (H…
	EC	GO|GO.CC	GO:0045121	membrane raft	1.29363e-11	1.47422e-06	30	302 (ANXA2)|682 (BSG)|857 (CAV1)|871 (SERPINH1)|1495 (CTNNA1)|1604 (CD55)|1803 (DPP4)|2149 (F2R)|3356 (HTR2A)|3672 (ITGA1)|3688 (ITGB1)|3717 (JAK2)|3784 (KCNQ1)|3791 (KDR)|4846 (NOS3)|5175 (PECAM1)|5420 (PODXL)|5743 (PTGS2)|5979 (RET)|6513 (SLC2A1)|7010 (TEK)|7035 (TFPI)|8737 (RIPK1)|8826 (IQGAP1)|8915 (BCL10)|10008 (KCNE3)|10395 (DLC1)|26509 (MYOF)|30846 (EHD2)|79026 (AHNAK)
	EC	GO|GO.CC	GO:0098857	membrane microdomain	1.40535e-11	1.60154e-06	30	302 (ANXA2)|682 (BSG)|857 (CAV1)|871 (SERPINH1)|1495 (CTNNA1)|1604 (CD55)|1803 (DPP4)|2149 (F2R)|3356 (HTR2A)|3672 (ITGA1)|3688 (ITGB1)|3717 (JAK2)|3784 (KCNQ1)|3791 (KDR)|4846 (NOS3)|5175 (PECAM1)|5420 (PODXL)|5743 (PTGS2)|5979 (RET)|6513 (SLC2A1)|7010 (TEK)|7035 (TFPI)|8737 (RIPK1)|8826 (IQGAP1)|8915 (BCL10)|10008 (KCNE3)|10395 (DLC1)|26509 (MYOF)|30846 (EHD2)|79026 (AHNAK)
	EC	GO|GO.CC	GO:0070062	extracellular exosome	1.48653e-11	1.69405e-06	97	81 (ACTN4)|87 (ACTN1)|102 (ADAM10)|301 (ANXA1)|302 (ANXA2)|306 (ANXA3)|308 (ANXA5)|309 (ANXA6)|310 (ANXA7)|389 (RHOC)|419 (ART3)|633 (BGN)|682 (BSG)|762 (CA4)|822 (CAPG)|958 (CD40)|966 (CD59)|1378 (CR1)|1604 (CD55)|1803 (DPP4)|1889 (ECE1)|1893 (ECM1)|2050 (EPHB4)|2335 (FN1)|2444 (FRK)|2632 (GBE1)|3251 (HPRT1)|3315 (HSPB1)|3339 (HSPG2)|3426 (CFI)|3490 (IGFBP7)|3646 (EIF3E)|3672 (ITGA1)|3688 (ITGB1…
	EC	GO|GO.BP	GO:0042221	response to chemical	1.60338e-11	1.82721e-06	167	32 (ACACB)|94 (ACVRL1)|102 (ADAM10)|135 (ADORA2A)|182 (JAG1)|196 (AHR)|285 (ANGPT2)|301 (ANXA1)|302 (ANXA2)|306 (ANXA3)|308 (ANXA5)|310 (ANXA7)|368 (ABCC6)|666 (BOK)|682 (BSG)|839 (CASP6)|840 (CASP7)|857 (CAV1)|871 (SERPINH1)|947 (CD34)|958 (CD40)|1003 (CDH5)|1030 (CDKN2B)|1282 (COL4A1)|1285 (COL4A3)|1317 (SLC31A1)|1495 (CTNNA1)|1604 (CD55)|1848 (DUSP6)|1893 (ECM1)|1942 (EFNA1)|1997 (ELF1)|2022 (…
	EC	GO|GO.BP	GO:0034330	cell junction organization	1.60505e-11	1.82912e-06	29	81 (ACTN4)|87 (ACTN1)|94 (ACVRL1)|389 (RHOC)|857 (CAV1)|977 (CD151)|1003 (CDH5)|1495 (CTNNA1)|2149 (F2R)|2335 (FN1)|2701 (GJA4)|2702 (GJA5)|3791 (KDR)|3911 (LAMA5)|3915 (LAMC1)|3987 (LIMS1)|5583 (PRKCH)|5817 (PVR)|6591 (SNAI2)|7010 (TEK)|7122 (CLDN5)|8826 (IQGAP1)|10395 (DLC1)|29984 (RHOD)|51599 (LSR)|57493 (HEG1)|143098 (MPP7)|153562 (MARVELD2)|100506658 (OCLN)
	EC	GO|GO.BP	GO:0008284	positive regulation of cell proliferation	1.75729e-11	2.0026e-06	57	94 (ACVRL1)|102 (ADAM10)|187 (APLNR)|301 (ANXA1)|302 (ANXA2)|901 (CCNG2)|958 (CD40)|1604 (CD55)|1803 (DPP4)|1893 (ECM1)|2113 (ETS1)|2149 (F2R)|2321 (FLT1)|2324 (FLT4)|2335 (FN1)|2624 (GATA2)|2651 (GCNT2)|2869 (GRK5)|3356 (HTR2A)|3480 (IGF1R)|3688 (ITGB1)|3717 (JAK2)|3791 (KDR)|3912 (LAMB1)|3915 (LAMC1)|4254 (KITLG)|4690 (NCK1)|4831 (NME2)|4953 (ODC1)|5583 (PRKCH)|5743 (PTGS2)|6909 (TBX2)|6926 (TB…
	EC	GO|GO.CC	GO:0005576	extracellular region	1.81415e-11	2.0674e-06	164	81 (ACTN4)|87 (ACTN1)|102 (ADAM10)|182 (JAG1)|285 (ANGPT2)|301 (ANXA1)|302 (ANXA2)|306 (ANXA3)|308 (ANXA5)|309 (ANXA6)|310 (ANXA7)|389 (RHOC)|419 (ART3)|633 (BGN)|682 (BSG)|762 (CA4)|822 (CAPG)|871 (SERPINH1)|947 (CD34)|958 (CD40)|966 (CD59)|977 (CD151)|1282 (COL4A1)|1285 (COL4A3)|1378 (CR1)|1604 (CD55)|1803 (DPP4)|1842 (ECM2)|1889 (ECE1)|1893 (ECM1)|1942 (EFNA1)|2022 (ENG)|2050 (EPHB4)|2149 (F2R…
	EC	GO|GO.BP	GO:0048869	cellular developmental process	2.24126e-11	2.55414e-06	157	81 (ACTN4)|87 (ACTN1)|94 (ACVRL1)|102 (ADAM10)|135 (ADORA2A)|182 (JAG1)|187 (APLNR)|285 (ANGPT2)|301 (ANXA1)|302 (ANXA2)|309 (ANXA6)|310 (ANXA7)|389 (RHOC)|663 (BNIP2)|666 (BOK)|682 (BSG)|839 (CASP6)|857 (CAV1)|871 (SERPINH1)|947 (CD34)|1003 (CDH5)|1030 (CDKN2B)|1258 (CNGB1)|1282 (COL4A1)|1378 (CR1)|1390 (CREM)|1495 (CTNNA1)|1848 (DUSP6)|1942 (EFNA1)|1997 (ELF1)|2022 (ENG)|2050 (EPHB4)|2078 (ERG)…
	EC	GO|GO.CC	GO:1903561	extracellular vesicle	2.64403e-11	3.01314e-06	97	81 (ACTN4)|87 (ACTN1)|102 (ADAM10)|301 (ANXA1)|302 (ANXA2)|306 (ANXA3)|308 (ANXA5)|309 (ANXA6)|310 (ANXA7)|389 (RHOC)|419 (ART3)|633 (BGN)|682 (BSG)|762 (CA4)|822 (CAPG)|958 (CD40)|966 (CD59)|1378 (CR1)|1604 (CD55)|1803 (DPP4)|1889 (ECE1)|1893 (ECM1)|2050 (EPHB4)|2335 (FN1)|2444 (FRK)|2632 (GBE1)|3251 (HPRT1)|3315 (HSPB1)|3339 (HSPG2)|3426 (CFI)|3490 (IGFBP7)|3646 (EIF3E)|3672 (ITGA1)|3688 (ITGB1…
	EC	GO|GO.BP	GO:0051094	positive regulation of developmental process	2.76187e-11	3.14743e-06	72	32 (ACACB)|94 (ACVRL1)|182 (JAG1)|187 (APLNR)|285 (ANGPT2)|301 (ANXA1)|302 (ANXA2)|306 (ANXA3)|663 (BNIP2)|947 (CD34)|958 (CD40)|1003 (CDH5)|1495 (CTNNA1)|1893 (ECM1)|2022 (ENG)|2113 (ETS1)|2296 (FOXC1)|2321 (FLT1)|2335 (FN1)|2624 (GATA2)|2651 (GCNT2)|3315 (HSPB1)|3356 (HTR2A)|3688 (ITGB1)|3717 (JAK2)|3791 (KDR)|3987 (LIMS1)|4017 (LOXL2)|4124 (MAN2A1)|4254 (KITLG)|4690 (NCK1)|4831 (NME2)|4846 (NO…
	EC	GO|GO.CC	GO:0005737	cytoplasm	2.7718e-11	3.15875e-06	327	32 (ACACB)|81 (ACTN4)|87 (ACTN1)|102 (ADAM10)|125 (ADH1B)|196 (AHR)|301 (ANXA1)|302 (ANXA2)|306 (ANXA3)|308 (ANXA5)|309 (ANXA6)|310 (ANXA7)|368 (ABCC6)|389 (RHOC)|633 (BGN)|663 (BNIP2)|666 (BOK)|682 (BSG)|689 (BTF3)|762 (CA4)|822 (CAPG)|831 (CAST)|839 (CASP6)|840 (CASP7)|857 (CAV1)|871 (SERPINH1)|901 (CCNG2)|947 (CD34)|958 (CD40)|966 (CD59)|977 (CD151)|1030 (CDKN2B)|1033 (CDKN3)|1258 (CNGB1)|1282…
	EC	GO|GO.CC	GO:0043230	extracellular organelle	2.78463e-11	3.17336e-06	97	81 (ACTN4)|87 (ACTN1)|102 (ADAM10)|301 (ANXA1)|302 (ANXA2)|306 (ANXA3)|308 (ANXA5)|309 (ANXA6)|310 (ANXA7)|389 (RHOC)|419 (ART3)|633 (BGN)|682 (BSG)|762 (CA4)|822 (CAPG)|958 (CD40)|966 (CD59)|1378 (CR1)|1604 (CD55)|1803 (DPP4)|1889 (ECE1)|1893 (ECM1)|2050 (EPHB4)|2335 (FN1)|2444 (FRK)|2632 (GBE1)|3251 (HPRT1)|3315 (HSPB1)|3339 (HSPG2)|3426 (CFI)|3490 (IGFBP7)|3646 (EIF3E)|3672 (ITGA1)|3688 (ITGB1…
	EC	GO|GO.BP	GO:0048522	positive regulation of cellular process	2.87107e-11	3.27187e-06	184	32 (ACACB)|81 (ACTN4)|87 (ACTN1)|94 (ACVRL1)|102 (ADAM10)|135 (ADORA2A)|182 (JAG1)|187 (APLNR)|196 (AHR)|301 (ANXA1)|302 (ANXA2)|306 (ANXA3)|308 (ANXA5)|389 (RHOC)|663 (BNIP2)|666 (BOK)|857 (CAV1)|901 (CCNG2)|947 (CD34)|958 (CD40)|977 (CD151)|1003 (CDH5)|1030 (CDKN2B)|1163 (CKS1B)|1285 (COL4A3)|1378 (CR1)|1390 (CREM)|1495 (CTNNA1)|1604 (CD55)|1803 (DPP4)|1848 (DUSP6)|1879 (EBF1)|1889 (ECE1)|1893 …
	EC	GO|GO.BP	GO:0048523	negative regulation of cellular process	3.39534e-11	3.86933e-06	169	32 (ACACB)|81 (ACTN4)|87 (ACTN1)|94 (ACVRL1)|102 (ADAM10)|135 (ADORA2A)|182 (JAG1)|187 (APLNR)|196 (AHR)|285 (ANGPT2)|301 (ANXA1)|302 (ANXA2)|308 (ANXA5)|309 (ANXA6)|663 (BNIP2)|666 (BOK)|822 (CAPG)|831 (CAST)|857 (CAV1)|871 (SERPINH1)|947 (CD34)|966 (CD59)|1030 (CDKN2B)|1033 (CDKN3)|1285 (COL4A3)|1378 (CR1)|1390 (CREM)|1495 (CTNNA1)|1604 (CD55)|1803 (DPP4)|1848 (DUSP6)|1893 (ECM1)|1942 (EFNA1)|1…
	EC	GO|GO.CC	GO:0098589	membrane region	3.41601e-11	3.89289e-06	30	302 (ANXA2)|682 (BSG)|857 (CAV1)|871 (SERPINH1)|1495 (CTNNA1)|1604 (CD55)|1803 (DPP4)|2149 (F2R)|3356 (HTR2A)|3672 (ITGA1)|3688 (ITGB1)|3717 (JAK2)|3784 (KCNQ1)|3791 (KDR)|4846 (NOS3)|5175 (PECAM1)|5420 (PODXL)|5743 (PTGS2)|5979 (RET)|6513 (SLC2A1)|7010 (TEK)|7035 (TFPI)|8737 (RIPK1)|8826 (IQGAP1)|8915 (BCL10)|10008 (KCNE3)|10395 (DLC1)|26509 (MYOF)|30846 (EHD2)|79026 (AHNAK)
	EC	GO|GO.CC	GO:0044421	extracellular region part	3.55275e-11	4.04871e-06	141	81 (ACTN4)|87 (ACTN1)|102 (ADAM10)|285 (ANGPT2)|301 (ANXA1)|302 (ANXA2)|306 (ANXA3)|308 (ANXA5)|309 (ANXA6)|310 (ANXA7)|389 (RHOC)|419 (ART3)|633 (BGN)|682 (BSG)|762 (CA4)|822 (CAPG)|871 (SERPINH1)|947 (CD34)|958 (CD40)|966 (CD59)|977 (CD151)|1282 (COL4A1)|1285 (COL4A3)|1378 (CR1)|1604 (CD55)|1803 (DPP4)|1842 (ECM2)|1889 (ECE1)|1893 (ECM1)|2022 (ENG)|2050 (EPHB4)|2321 (FLT1)|2335 (FN1)|2444 (FRK)…
	EC	GO|GO.BP	GO:0032835	glomerulus development	4.6964e-11	5.35202e-06	14	182 (JAG1)|285 (ANGPT2)|947 (CD34)|1285 (COL4A3)|2296 (FOXC1)|2828 (GPR4)|4643 (MYO1E)|4811 (NID1)|5175 (PECAM1)|5420 (PODXL)|5979 (RET)|7010 (TEK)|8826 (IQGAP1)|25937 (WWTR1)
	EC	GO|GO.MF	GO:0005178	integrin binding	5.84995e-11	6.6666e-06	19	81 (ACTN4)|87 (ACTN1)|102 (ADAM10)|310 (ANXA7)|977 (CD151)|1285 (COL4A3)|1842 (ECM2)|2335 (FN1)|3384 (ICAM2)|3688 (ITGB1)|3791 (KDR)|3911 (LAMA5)|7402 (UTRN)|7448 (VTN)|7450 (VWF)|8174 (MADCAM1)|8482 (SEMA7A)|10516 (FBLN5)|11095 (ADAMTS8)
	EC	GO|GO.BP	GO:0048584	positive regulation of response to stimulus	5.85962e-11	6.67762e-06	102	81 (ACTN4)|94 (ACVRL1)|102 (ADAM10)|135 (ADORA2A)|182 (JAG1)|301 (ANXA1)|389 (RHOC)|666 (BOK)|857 (CAV1)|958 (CD40)|966 (CD59)|1030 (CDKN2B)|1378 (CR1)|1495 (CTNNA1)|1604 (CD55)|1848 (DUSP6)|1893 (ECM1)|1942 (EFNA1)|1997 (ELF1)|2022 (ENG)|2050 (EPHB4)|2113 (ETS1)|2149 (F2R)|2321 (FLT1)|2324 (FLT4)|2624 (GATA2)|2651 (GCNT2)|2828 (GPR4)|2886 (GRB7)|2887 (GRB10)|3090 (HIC1)|3315 (HSPB1)|3356 (HTR2A)…
	EC	GO|GO.BP	GO:0043535	regulation of blood vessel endothelial cell migration	6.63259e-11	7.5585e-06	21	94 (ACVRL1)|285 (ANGPT2)|301 (ANXA1)|958 (CD40)|1942 (EFNA1)|2113 (ETS1)|2624 (GATA2)|3315 (HSPB1)|3791 (KDR)|4846 (NOS3)|5547 (PRCP)|5743 (PTGS2)|7424 (VEGFC)|10769 (PLK2)|11235 (PDCD10)|25865 (PRKD2)|29775 (CARD10)|54567 (DLL4)|57381 (RHOJ)|79812 (MMRN2)|90627 (STARD13)
	EC	GO|GO.BP	GO:1904018	positive regulation of vasculature development	7.18216e-11	8.18479e-06	25	94 (ACVRL1)|187 (APLNR)|285 (ANGPT2)|301 (ANXA1)|306 (ANXA3)|947 (CD34)|958 (CD40)|1003 (CDH5)|1893 (ECM1)|2022 (ENG)|2113 (ETS1)|2321 (FLT1)|2624 (GATA2)|3315 (HSPB1)|3688 (ITGB1)|3791 (KDR)|4846 (NOS3)|5743 (PTGS2)|6237 (RRAS)|7010 (TEK)|7424 (VEGFC)|10769 (PLK2)|25865 (PRKD2)|51129 (ANGPTL4)|57381 (RHOJ)
	EC	GO|GO.CC	GO:0044425	membrane part	8.3434e-11	9.50813e-06	219	94 (ACVRL1)|102 (ADAM10)|135 (ADORA2A)|182 (JAG1)|187 (APLNR)|301 (ANXA1)|302 (ANXA2)|308 (ANXA5)|310 (ANXA7)|368 (ABCC6)|389 (RHOC)|419 (ART3)|666 (BOK)|682 (BSG)|762 (CA4)|857 (CAV1)|871 (SERPINH1)|947 (CD34)|958 (CD40)|966 (CD59)|977 (CD151)|1003 (CDH5)|1258 (CNGB1)|1317 (SLC31A1)|1349 (COX7B)|1378 (CR1)|1495 (CTNNA1)|1604 (CD55)|1803 (DPP4)|1889 (ECE1)|1942 (EFNA1)|2012 (EMP1)|2022 (ENG)|2050…
	EC	GO|GO.BP	GO:0048731	system development	1.01014e-10	1.15116e-05	168	32 (ACACB)|87 (ACTN1)|94 (ACVRL1)|102 (ADAM10)|135 (ADORA2A)|182 (JAG1)|187 (APLNR)|196 (AHR)|285 (ANGPT2)|301 (ANXA1)|302 (ANXA2)|306 (ANXA3)|309 (ANXA6)|666 (BOK)|682 (BSG)|857 (CAV1)|871 (SERPINH1)|947 (CD34)|958 (CD40)|1003 (CDH5)|1030 (CDKN2B)|1258 (CNGB1)|1282 (COL4A1)|1285 (COL4A3)|1349 (COX7B)|1378 (CR1)|1495 (CTNNA1)|1848 (DUSP6)|1889 (ECE1)|1893 (ECM1)|1942 (EFNA1)|2022 (ENG)|2050 (EPHB…
	EC	GO|GO.BP	GO:0007275	multicellular organism development	1.06628e-10	1.21514e-05	182	32 (ACACB)|87 (ACTN1)|94 (ACVRL1)|102 (ADAM10)|135 (ADORA2A)|182 (JAG1)|187 (APLNR)|196 (AHR)|285 (ANGPT2)|301 (ANXA1)|302 (ANXA2)|306 (ANXA3)|309 (ANXA6)|666 (BOK)|682 (BSG)|857 (CAV1)|871 (SERPINH1)|947 (CD34)|958 (CD40)|1003 (CDH5)|1030 (CDKN2B)|1258 (CNGB1)|1282 (COL4A1)|1285 (COL4A3)|1349 (COX7B)|1378 (CR1)|1390 (CREM)|1495 (CTNNA1)|1848 (DUSP6)|1879 (EBF1)|1889 (ECE1)|1893 (ECM1)|1942 (EFNA…
	EC	GO|GO.BP	GO:0009611	response to wounding	1.07688e-10	1.22722e-05	44	94 (ACVRL1)|135 (ADORA2A)|301 (ANXA1)|302 (ANXA2)|308 (ANXA5)|389 (RHOC)|857 (CAV1)|947 (CD34)|958 (CD40)|966 (CD59)|977 (CD151)|1495 (CTNNA1)|2113 (ETS1)|2149 (F2R)|2335 (FN1)|2624 (GATA2)|2828 (GPR4)|3315 (HSPB1)|3708 (ITPR1)|3717 (JAK2)|4628 (MYH10)|4638 (MYLK)|4846 (NOS3)|5175 (PECAM1)|5265 (SERPINA1)|5547 (PRCP)|5583 (PRKCH)|7035 (TFPI)|7056 (THBD)|7076 (TIMP1)|7448 (VTN)|7450 (VWF)|8323 (FZ…
	EC	GO|GO.CC	GO:0098590	plasma membrane region	1.14983e-10	1.31035e-05	63	102 (ADAM10)|135 (ADORA2A)|182 (JAG1)|301 (ANXA1)|302 (ANXA2)|368 (ABCC6)|389 (RHOC)|762 (CA4)|857 (CAV1)|947 (CD34)|1258 (CNGB1)|1495 (CTNNA1)|1803 (DPP4)|2149 (F2R)|2335 (FN1)|3356 (HTR2A)|3384 (ICAM2)|3688 (ITGB1)|3717 (JAK2)|3784 (KCNQ1)|3953 (LEPR)|4628 (MYH10)|4638 (MYLK)|4846 (NOS3)|4935 (GPR143)|5002 (SLC22A18)|5243 (ABCB1)|5420 (PODXL)|5743 (PTGS2)|5871 (MAP4K2)|6513 (SLC2A1)|6781 (STC1)…
	EC	GO|GO.CC	GO:0031226	intrinsic component of plasma membrane	1.25752e-10	1.43307e-05	80	94 (ACVRL1)|135 (ADORA2A)|182 (JAG1)|187 (APLNR)|419 (ART3)|682 (BSG)|762 (CA4)|857 (CAV1)|947 (CD34)|958 (CD40)|966 (CD59)|977 (CD151)|1317 (SLC31A1)|1378 (CR1)|1942 (EFNA1)|2050 (EPHB4)|2149 (F2R)|2321 (FLT1)|2324 (FLT4)|2615 (LRRC32)|2701 (GJA4)|2702 (GJA5)|2826 (CCR10)|2828 (GPR4)|3356 (HTR2A)|3384 (ICAM2)|3454 (IFNAR1)|3480 (IGF1R)|3554 (IL1R1)|3672 (ITGA1)|3688 (ITGB1)|3714 (JAG2)|3759 (KCN…
	EC	GO|GO.BP	GO:0030155	regulation of cell adhesion	2.01558e-10	2.29696e-05	44	81 (ACTN4)|94 (ACVRL1)|102 (ADAM10)|135 (ADORA2A)|182 (JAG1)|285 (ANGPT2)|301 (ANXA1)|857 (CAV1)|1604 (CD55)|1803 (DPP4)|1842 (ECM2)|1942 (EFNA1)|2113 (ETS1)|2335 (FN1)|2615 (LRRC32)|2651 (GCNT2)|3714 (JAG2)|3717 (JAK2)|3791 (KDR)|3910 (LAMA4)|3911 (LAMA5)|3987 (LIMS1)|4690 (NCK1)|4811 (NID1)|5074 (PAWR)|5420 (PODXL)|5979 (RET)|6591 (SNAI2)|7010 (TEK)|7037 (TFRC)|7402 (UTRN)|7448 (VTN)|7525 (YES1…
	EC	GO|GO.BP	GO:0071310	cellular response to organic substance	2.0172e-10	2.2988e-05	107	94 (ACVRL1)|196 (AHR)|285 (ANGPT2)|301 (ANXA1)|302 (ANXA2)|308 (ANXA5)|666 (BOK)|839 (CASP6)|840 (CASP7)|857 (CAV1)|958 (CD40)|1003 (CDH5)|1030 (CDKN2B)|1282 (COL4A1)|1495 (CTNNA1)|1604 (CD55)|1893 (ECM1)|1997 (ELF1)|2022 (ENG)|2296 (FOXC1)|2321 (FLT1)|2324 (FLT4)|2335 (FN1)|2615 (LRRC32)|2634 (GBP2)|2651 (GCNT2)|2826 (CCR10)|2887 (GRB10)|3315 (HSPB1)|3454 (IFNAR1)|3480 (IGF1R)|3490 (IGFBP7)|3554…
	EC	GO|GO.BP	GO:0048585	negative regulation of response to stimulus	2.08841e-10	2.37995e-05	77	135 (ADORA2A)|187 (APLNR)|285 (ANGPT2)|301 (ANXA1)|302 (ANXA2)|308 (ANXA5)|666 (BOK)|857 (CAV1)|947 (CD34)|966 (CD59)|1003 (CDH5)|1378 (CR1)|1495 (CTNNA1)|1604 (CD55)|1848 (DUSP6)|1893 (ECM1)|1942 (EFNA1)|1997 (ELF1)|2050 (EPHB4)|2113 (ETS1)|2122 (MECOM)|2321 (FLT1)|2324 (FLT4)|2624 (GATA2)|2887 (GRB10)|3090 (HIC1)|3315 (HSPB1)|3480 (IGF1R)|3672 (ITGA1)|3688 (ITGB1)|3708 (ITPR1)|3791 (KDR)|4091 (…
	EC	GO|GO.CC	GO:0005615	extracellular space	2.23616e-10	2.54833e-05	133	81 (ACTN4)|87 (ACTN1)|102 (ADAM10)|285 (ANGPT2)|301 (ANXA1)|302 (ANXA2)|306 (ANXA3)|308 (ANXA5)|309 (ANXA6)|310 (ANXA7)|389 (RHOC)|419 (ART3)|633 (BGN)|682 (BSG)|762 (CA4)|822 (CAPG)|871 (SERPINH1)|958 (CD40)|966 (CD59)|1282 (COL4A1)|1285 (COL4A3)|1378 (CR1)|1604 (CD55)|1803 (DPP4)|1889 (ECE1)|1893 (ECM1)|2022 (ENG)|2050 (EPHB4)|2321 (FLT1)|2335 (FN1)|2444 (FRK)|2615 (LRRC32)|2632 (GBE1)|3251 (HP…
	EC	GO|GO.BP	GO:2000026	regulation of multicellular organismal development	2.28798e-10	2.60739e-05	91	32 (ACACB)|94 (ACVRL1)|102 (ADAM10)|182 (JAG1)|187 (APLNR)|285 (ANGPT2)|301 (ANXA1)|302 (ANXA2)|306 (ANXA3)|857 (CAV1)|947 (CD34)|958 (CD40)|1003 (CDH5)|1285 (COL4A3)|1378 (CR1)|1495 (CTNNA1)|1848 (DUSP6)|1893 (ECM1)|1942 (EFNA1)|2022 (ENG)|2113 (ETS1)|2296 (FOXC1)|2321 (FLT1)|2335 (FN1)|2624 (GATA2)|2651 (GCNT2)|2828 (GPR4)|3315 (HSPB1)|3339 (HSPG2)|3665 (IRF7)|3688 (ITGB1)|3791 (KDR)|3910 (LAMA…
	EC	GO|GO.BP	GO:0003013	circulatory system process	2.47944e-10	2.82557e-05	37	94 (ACVRL1)|135 (ADORA2A)|857 (CAV1)|947 (CD34)|1285 (COL4A3)|1889 (ECE1)|2149 (F2R)|2296 (FOXC1)|2313 (FLI1)|2702 (GJA5)|3356 (HTR2A)|3672 (ITGA1)|3708 (ITPR1)|3717 (JAK2)|3759 (KCNJ2)|3764 (KCNJ8)|3784 (KCNQ1)|4843 (NOS2)|4846 (NOS3)|4881 (NPR1)|5547 (PRCP)|5743 (PTGS2)|6781 (STC1)|6909 (TBX2)|7010 (TEK)|7424 (VEGFC)|7525 (YES1)|8654 (PDE5A)|8862 (APLN)|10008 (KCNE3)|10135 (NAMPT)|25937 (WWTR1)…
	EC	GO|GO.BP	GO:0065008	regulation of biological quality	2.51804e-10	2.86956e-05	143	32 (ACACB)|94 (ACVRL1)|102 (ADAM10)|135 (ADORA2A)|187 (APLNR)|301 (ANXA1)|302 (ANXA2)|308 (ANXA5)|309 (ANXA6)|310 (ANXA7)|389 (RHOC)|666 (BOK)|822 (CAPG)|857 (CAV1)|947 (CD34)|958 (CD40)|966 (CD59)|1258 (CNGB1)|1317 (SLC31A1)|1604 (CD55)|1803 (DPP4)|1889 (ECE1)|1942 (EFNA1)|2113 (ETS1)|2149 (F2R)|2296 (FOXC1)|2313 (FLI1)|2335 (FN1)|2624 (GATA2)|2651 (GCNT2)|2702 (GJA5)|2826 (CCR10)|2828 (GPR4)|28…
	EC	GO|GO.BP	GO:0060429	epithelium development	2.67883e-10	3.05279e-05	64	94 (ACVRL1)|182 (JAG1)|301 (ANXA1)|302 (ANXA2)|310 (ANXA7)|389 (RHOC)|839 (CASP6)|857 (CAV1)|947 (CD34)|977 (CD151)|1003 (CDH5)|1282 (COL4A1)|2022 (ENG)|2296 (FOXC1)|2701 (GJA4)|2702 (GJA5)|2828 (GPR4)|3714 (JAG2)|3717 (JAK2)|3791 (KDR)|3911 (LAMA5)|4091 (SMAD6)|4487 (MSX1)|4643 (MYO1E)|4831 (NME2)|5175 (PECAM1)|5420 (PODXL)|5583 (PRKCH)|5979 (RET)|6591 (SNAI2)|6781 (STC1)|6788 (STK3)|6909 (TBX2)…
	EC	GO|GO.MF	GO:0003674	molecular_function	3.07875e-10	3.50854e-05	437	32 (ACACB)|81 (ACTN4)|87 (ACTN1)|94 (ACVRL1)|102 (ADAM10)|125 (ADH1B)|135 (ADORA2A)|182 (JAG1)|187 (APLNR)|196 (AHR)|285 (ANGPT2)|301 (ANXA1)|302 (ANXA2)|306 (ANXA3)|308 (ANXA5)|309 (ANXA6)|310 (ANXA7)|368 (ABCC6)|389 (RHOC)|419 (ART3)|633 (BGN)|663 (BNIP2)|666 (BOK)|682 (BSG)|689 (BTF3)|762 (CA4)|822 (CAPG)|831 (CAST)|839 (CASP6)|840 (CASP7)|857 (CAV1)|871 (SERPINH1)|901 (CCNG2)|947 (CD34)|958 (…
	EC	GO|GO.BP	GO:0051240	positive regulation of multicellular organismal process	3.10908e-10	3.54311e-05	81	32 (ACACB)|94 (ACVRL1)|135 (ADORA2A)|182 (JAG1)|187 (APLNR)|285 (ANGPT2)|301 (ANXA1)|302 (ANXA2)|306 (ANXA3)|857 (CAV1)|947 (CD34)|958 (CD40)|1003 (CDH5)|1893 (ECM1)|2022 (ENG)|2113 (ETS1)|2149 (F2R)|2296 (FOXC1)|2321 (FLT1)|2324 (FLT4)|2335 (FN1)|2624 (GATA2)|2651 (GCNT2)|2702 (GJA5)|2887 (GRB10)|3315 (HSPB1)|3356 (HTR2A)|3480 (IGF1R)|3554 (IL1R1)|3665 (IRF7)|3688 (ITGB1)|3717 (JAK2)|3784 (KCNQ1…
	EC	GO|GO.BP	GO:0002040	sprouting angiogenesis	3.18713e-10	3.63205e-05	22	94 (ACVRL1)|187 (APLNR)|301 (ANXA1)|2050 (EPHB4)|2324 (FLT4)|2624 (GATA2)|3688 (ITGB1)|3791 (KDR)|4017 (LOXL2)|5743 (PTGS2)|7010 (TEK)|7424 (VEGFC)|10769 (PLK2)|11235 (PDCD10)|29775 (CARD10)|51176 (LEF1)|54567 (DLL4)|56999 (ADAMTS9)|57381 (RHOJ)|79812 (MMRN2)|90627 (STARD13)|161198 (CLEC14A)
	EC	GO|GO.BP	GO:0048519	negative regulation of biological process	4.55455e-10	5.19037e-05	189	32 (ACACB)|81 (ACTN4)|87 (ACTN1)|94 (ACVRL1)|102 (ADAM10)|135 (ADORA2A)|182 (JAG1)|187 (APLNR)|196 (AHR)|285 (ANGPT2)|301 (ANXA1)|302 (ANXA2)|308 (ANXA5)|309 (ANXA6)|310 (ANXA7)|663 (BNIP2)|666 (BOK)|822 (CAPG)|831 (CAST)|857 (CAV1)|871 (SERPINH1)|947 (CD34)|966 (CD59)|1003 (CDH5)|1030 (CDKN2B)|1033 (CDKN3)|1285 (COL4A3)|1378 (CR1)|1390 (CREM)|1495 (CTNNA1)|1604 (CD55)|1803 (DPP4)|1848 (DUSP6)|18…
	EC	GO|GO.BP	GO:0032501	multicellular organismal process	4.82016e-10	5.49306e-05	233	32 (ACACB)|87 (ACTN1)|94 (ACVRL1)|102 (ADAM10)|135 (ADORA2A)|182 (JAG1)|187 (APLNR)|196 (AHR)|285 (ANGPT2)|301 (ANXA1)|302 (ANXA2)|306 (ANXA3)|308 (ANXA5)|309 (ANXA6)|368 (ABCC6)|633 (BGN)|666 (BOK)|682 (BSG)|857 (CAV1)|871 (SERPINH1)|947 (CD34)|958 (CD40)|966 (CD59)|1003 (CDH5)|1030 (CDKN2B)|1258 (CNGB1)|1282 (COL4A1)|1285 (COL4A3)|1349 (COX7B)|1378 (CR1)|1390 (CREM)|1495 (CTNNA1)|1604 (CD55)|18…
	EC	GO|GO.BP	GO:0048729	tissue morphogenesis	5.24453e-10	5.97667e-05	41	94 (ACVRL1)|182 (JAG1)|389 (RHOC)|977 (CD151)|1282 (COL4A1)|2022 (ENG)|2296 (FOXC1)|3688 (ITGB1)|3714 (JAG2)|3911 (LAMA5)|4487 (MSX1)|4638 (MYLK)|4846 (NOS3)|5420 (PODXL)|5979 (RET)|6591 (SNAI2)|6781 (STC1)|6788 (STK3)|6909 (TBX2)|6926 (TBX3)|7041 (TGFB1I1)|7049 (TGFBR3)|7074 (TIAM1)|7424 (VEGFC)|7547 (ZIC3)|8322 (FZD4)|8323 (FZD6)|8463 (TEAD2)|8915 (BCL10)|10395 (DLC1)|11235 (PDCD10)|25865 (PRKD…
	EC	GO|GO.BP	GO:0009967	positive regulation of signal transduction	1.0047e-09	0.000114496	75	81 (ACTN4)|94 (ACVRL1)|135 (ADORA2A)|182 (JAG1)|389 (RHOC)|666 (BOK)|857 (CAV1)|958 (CD40)|1030 (CDKN2B)|1495 (CTNNA1)|1848 (DUSP6)|1893 (ECM1)|1942 (EFNA1)|2022 (ENG)|2050 (EPHB4)|2149 (F2R)|2321 (FLT1)|2324 (FLT4)|2651 (GCNT2)|2828 (GPR4)|2886 (GRB7)|2887 (GRB10)|3090 (HIC1)|3356 (HTR2A)|3480 (IGF1R)|3554 (IL1R1)|3665 (IRF7)|3672 (ITGA1)|3688 (ITGB1)|3714 (JAG2)|3717 (JAK2)|3791 (KDR)|3987 (LIM…
	EC	GO|GO.CC	GO:0005887	integral component of plasma membrane	1.18548e-09	0.000135097	75	94 (ACVRL1)|135 (ADORA2A)|182 (JAG1)|187 (APLNR)|682 (BSG)|857 (CAV1)|947 (CD34)|958 (CD40)|977 (CD151)|1317 (SLC31A1)|1378 (CR1)|2050 (EPHB4)|2149 (F2R)|2321 (FLT1)|2324 (FLT4)|2615 (LRRC32)|2701 (GJA4)|2702 (GJA5)|2826 (CCR10)|2828 (GPR4)|3356 (HTR2A)|3384 (ICAM2)|3454 (IFNAR1)|3480 (IGF1R)|3554 (IL1R1)|3672 (ITGA1)|3688 (ITGB1)|3714 (JAG2)|3759 (KCNJ2)|3764 (KCNJ8)|3784 (KCNQ1)|3791 (KDR)|4059…
	EC	GO|GO.BP	GO:0010632	regulation of epithelial cell migration	1.562e-09	0.000178005	26	94 (ACVRL1)|285 (ANGPT2)|301 (ANXA1)|306 (ANXA3)|958 (CD40)|1942 (EFNA1)|2113 (ETS1)|2324 (FLT4)|2624 (GATA2)|3315 (HSPB1)|3791 (KDR)|4846 (NOS3)|5547 (PRCP)|5743 (PTGS2)|6781 (STC1)|7010 (TEK)|7424 (VEGFC)|10769 (PLK2)|11235 (PDCD10)|25865 (PRKD2)|29775 (CARD10)|54567 (DLL4)|56999 (ADAMTS9)|57381 (RHOJ)|79812 (MMRN2)|90627 (STARD13)
	EC	GO|GO.BP	GO:0048513	animal organ development	2.12108e-09	0.000241718	128	32 (ACACB)|87 (ACTN1)|94 (ACVRL1)|182 (JAG1)|187 (APLNR)|285 (ANGPT2)|301 (ANXA1)|302 (ANXA2)|306 (ANXA3)|309 (ANXA6)|666 (BOK)|682 (BSG)|857 (CAV1)|871 (SERPINH1)|947 (CD34)|1030 (CDKN2B)|1282 (COL4A1)|1285 (COL4A3)|1378 (CR1)|1495 (CTNNA1)|1848 (DUSP6)|1889 (ECE1)|1893 (ECM1)|1942 (EFNA1)|2022 (ENG)|2050 (EPHB4)|2113 (ETS1)|2122 (MECOM)|2296 (FOXC1)|2313 (FLI1)|2324 (FLT4)|2624 (GATA2)|2651 (GC…
	EC	GO|GO.CC	GO:0044444	cytoplasmic part	2.45835e-09	0.000280154	279	32 (ACACB)|81 (ACTN4)|87 (ACTN1)|102 (ADAM10)|125 (ADH1B)|196 (AHR)|301 (ANXA1)|302 (ANXA2)|306 (ANXA3)|308 (ANXA5)|309 (ANXA6)|310 (ANXA7)|368 (ABCC6)|389 (RHOC)|633 (BGN)|663 (BNIP2)|666 (BOK)|682 (BSG)|689 (BTF3)|762 (CA4)|822 (CAPG)|831 (CAST)|839 (CASP6)|840 (CASP7)|857 (CAV1)|871 (SERPINH1)|947 (CD34)|966 (CD59)|977 (CD151)|1030 (CDKN2B)|1033 (CDKN3)|1258 (CNGB1)|1282 (COL4A1)|1285 (COL4A3)…
	EC	GO|GO.BP	GO:0002376	immune system process	2.92417e-09	0.000333238	117	87 (ACTN1)|102 (ADAM10)|135 (ADORA2A)|182 (JAG1)|196 (AHR)|285 (ANGPT2)|301 (ANXA1)|302 (ANXA2)|306 (ANXA3)|682 (BSG)|857 (CAV1)|947 (CD34)|958 (CD40)|966 (CD59)|977 (CD151)|1030 (CDKN2B)|1378 (CR1)|1604 (CD55)|1803 (DPP4)|1893 (ECM1)|1997 (ELF1)|2113 (ETS1)|2122 (MECOM)|2296 (FOXC1)|2313 (FLI1)|2321 (FLT1)|2335 (FN1)|2444 (FRK)|2615 (LRRC32)|2624 (GATA2)|2634 (GBP2)|2826 (CCR10)|2886 (GRB7)|3251…
	EC	GO|GO.BP	GO:0023056	positive regulation of signaling	3.00338e-09	0.000342265	79	81 (ACTN4)|94 (ACVRL1)|135 (ADORA2A)|182 (JAG1)|302 (ANXA2)|389 (RHOC)|666 (BOK)|857 (CAV1)|958 (CD40)|1030 (CDKN2B)|1495 (CTNNA1)|1848 (DUSP6)|1889 (ECE1)|1893 (ECM1)|1942 (EFNA1)|2022 (ENG)|2050 (EPHB4)|2149 (F2R)|2321 (FLT1)|2324 (FLT4)|2651 (GCNT2)|2828 (GPR4)|2886 (GRB7)|2887 (GRB10)|3090 (HIC1)|3356 (HTR2A)|3480 (IGF1R)|3554 (IL1R1)|3665 (IRF7)|3672 (ITGA1)|3688 (ITGB1)|3714 (JAG2)|3717 (JA…
	EC	GO|GO.BP	GO:0065009	regulation of molecular function	3.22462e-09	0.000367477	120	32 (ACACB)|81 (ACTN4)|135 (ADORA2A)|182 (JAG1)|301 (ANXA1)|302 (ANXA2)|306 (ANXA3)|308 (ANXA5)|389 (RHOC)|663 (BNIP2)|666 (BOK)|831 (CAST)|857 (CAV1)|871 (SERPINH1)|901 (CCNG2)|958 (CD40)|1030 (CDKN2B)|1033 (CDKN3)|1163 (CKS1B)|1285 (COL4A3)|1378 (CR1)|1848 (DUSP6)|1893 (ECM1)|1942 (EFNA1)|2149 (F2R)|2296 (FOXC1)|2321 (FLT1)|2335 (FN1)|3315 (HSPB1)|3356 (HTR2A)|3480 (IGF1R)|3646 (EIF3E)|3672 (ITG…
	EC	GO|GO.BP	GO:1902531	regulation of intracellular signal transduction	3.69337e-09	0.000420897	82	81 (ACTN4)|187 (APLNR)|389 (RHOC)|666 (BOK)|857 (CAV1)|958 (CD40)|1848 (DUSP6)|1893 (ECM1)|1942 (EFNA1)|2022 (ENG)|2050 (EPHB4)|2122 (MECOM)|2149 (F2R)|2321 (FLT1)|2324 (FLT4)|2335 (FN1)|2651 (GCNT2)|2828 (GPR4)|3090 (HIC1)|3315 (HSPB1)|3356 (HTR2A)|3480 (IGF1R)|3672 (ITGA1)|3688 (ITGB1)|3708 (ITPR1)|3717 (JAK2)|3791 (KDR)|3987 (LIMS1)|4254 (KITLG)|4487 (MSX1)|4690 (NCK1)|4881 (NPR1)|4935 (GPR143…
	EC	GO|GO.BP	GO:0007599	hemostasis	3.70238e-09	0.000421924	28	135 (ADORA2A)|302 (ANXA2)|308 (ANXA5)|310 (ANXA7)|857 (CAV1)|947 (CD34)|958 (CD40)|966 (CD59)|2149 (F2R)|2313 (FLI1)|2624 (GATA2)|3315 (HSPB1)|3708 (ITPR1)|3717 (JAK2)|4846 (NOS3)|5265 (SERPINA1)|5547 (PRCP)|5583 (PRKCH)|7035 (TFPI)|7056 (THBD)|7448 (VTN)|7450 (VWF)|8323 (FZD6)|10544 (PROCR)|22915 (MMRN1)|30846 (EHD2)|160851 (DGKH)|375033 (PEAR1)
	EC	GO|GO.CC	GO:0012505	endomembrane system	4.57854e-09	0.00052177	152	32 (ACACB)|81 (ACTN4)|87 (ACTN1)|102 (ADAM10)|135 (ADORA2A)|301 (ANXA1)|302 (ANXA2)|306 (ANXA3)|309 (ANXA6)|310 (ANXA7)|368 (ABCC6)|633 (BGN)|663 (BNIP2)|666 (BOK)|682 (BSG)|762 (CA4)|831 (CAST)|857 (CAV1)|871 (SERPINH1)|966 (CD59)|1258 (CNGB1)|1282 (COL4A1)|1285 (COL4A3)|1317 (SLC31A1)|1378 (CR1)|1495 (CTNNA1)|1604 (CD55)|1889 (ECE1)|1893 (ECM1)|2149 (F2R)|2321 (FLT1)|2335 (FN1)|2444 (FRK)|2634 …
	EC	GO|GO.BP	GO:0030154	cell differentiation	5.07696e-09	0.000578571	144	81 (ACTN4)|87 (ACTN1)|94 (ACVRL1)|102 (ADAM10)|135 (ADORA2A)|182 (JAG1)|187 (APLNR)|285 (ANGPT2)|301 (ANXA1)|302 (ANXA2)|309 (ANXA6)|310 (ANXA7)|663 (BNIP2)|666 (BOK)|682 (BSG)|839 (CASP6)|857 (CAV1)|871 (SERPINH1)|947 (CD34)|1003 (CDH5)|1030 (CDKN2B)|1258 (CNGB1)|1282 (COL4A1)|1378 (CR1)|1390 (CREM)|1495 (CTNNA1)|1848 (DUSP6)|1942 (EFNA1)|1997 (ELF1)|2022 (ENG)|2050 (EPHB4)|2078 (ERG)|2113 (ETS1…
	EC	GO|GO.BP	GO:0010647	positive regulation of cell communication	5.69689e-09	0.000649218	78	81 (ACTN4)|94 (ACVRL1)|135 (ADORA2A)|182 (JAG1)|389 (RHOC)|666 (BOK)|857 (CAV1)|958 (CD40)|1030 (CDKN2B)|1495 (CTNNA1)|1848 (DUSP6)|1893 (ECM1)|1942 (EFNA1)|2022 (ENG)|2050 (EPHB4)|2149 (F2R)|2321 (FLT1)|2324 (FLT4)|2651 (GCNT2)|2702 (GJA5)|2828 (GPR4)|2886 (GRB7)|2887 (GRB10)|3090 (HIC1)|3356 (HTR2A)|3480 (IGF1R)|3554 (IL1R1)|3665 (IRF7)|3672 (ITGA1)|3688 (ITGB1)|3714 (JAG2)|3717 (JAK2)|3791 (KD…
	EC	GO|GO.BP	GO:0008015	blood circulation	7.73411e-09	0.000881379	34	94 (ACVRL1)|135 (ADORA2A)|857 (CAV1)|947 (CD34)|1285 (COL4A3)|1889 (ECE1)|2149 (F2R)|2296 (FOXC1)|2313 (FLI1)|2702 (GJA5)|3356 (HTR2A)|3672 (ITGA1)|3708 (ITPR1)|3717 (JAK2)|3759 (KCNJ2)|3764 (KCNJ8)|3784 (KCNQ1)|4843 (NOS2)|4846 (NOS3)|4881 (NPR1)|5547 (PRCP)|5743 (PTGS2)|6781 (STC1)|6909 (TBX2)|7010 (TEK)|7424 (VEGFC)|7525 (YES1)|8654 (PDE5A)|8862 (APLN)|10008 (KCNE3)|10135 (NAMPT)|26251 (KCNG2)…
	EC	GO|GO.BP	GO:0050878	regulation of body fluid levels	8.13677e-09	0.000927266	34	135 (ADORA2A)|187 (APLNR)|302 (ANXA2)|308 (ANXA5)|310 (ANXA7)|857 (CAV1)|947 (CD34)|958 (CD40)|966 (CD59)|2149 (F2R)|2313 (FLI1)|2624 (GATA2)|2702 (GJA5)|3315 (HSPB1)|3708 (ITPR1)|3717 (JAK2)|4846 (NOS3)|4881 (NPR1)|5265 (SERPINA1)|5547 (PRCP)|5583 (PRKCH)|7035 (TFPI)|7056 (THBD)|7448 (VTN)|7450 (VWF)|8323 (FZD6)|8862 (APLN)|10544 (PROCR)|22915 (MMRN1)|30846 (EHD2)|57493 (HEG1)|160851 (DGKH)|1968…
	EC	GO|GO.BP	GO:0035556	intracellular signal transduction	1.00663e-08	0.00114716	108	81 (ACTN4)|135 (ADORA2A)|187 (APLNR)|196 (AHR)|389 (RHOC)|666 (BOK)|857 (CAV1)|958 (CD40)|1848 (DUSP6)|1893 (ECM1)|1942 (EFNA1)|2022 (ENG)|2050 (EPHB4)|2122 (MECOM)|2149 (F2R)|2321 (FLT1)|2324 (FLT4)|2335 (FN1)|2651 (GCNT2)|2826 (CCR10)|2828 (GPR4)|3090 (HIC1)|3315 (HSPB1)|3356 (HTR2A)|3454 (IFNAR1)|3480 (IGF1R)|3665 (IRF7)|3672 (ITGA1)|3688 (ITGB1)|3708 (ITPR1)|3717 (JAK2)|3791 (KDR)|3987 (LIMS1…
	EC	GO|GO.BP	GO:0072006	nephron development	1.13629e-08	0.00129492	17	182 (JAG1)|285 (ANGPT2)|947 (CD34)|1285 (COL4A3)|2296 (FOXC1)|2828 (GPR4)|3911 (LAMA5)|4643 (MYO1E)|4811 (NID1)|5175 (PECAM1)|5420 (PODXL)|5979 (RET)|7010 (TEK)|8826 (IQGAP1)|25937 (WWTR1)|79191 (IRX3)|282679 (AQP11)
	EC	GO|GO.MF	GO:0042802	identical protein binding	1.156e-08	0.00131738	75	32 (ACACB)|81 (ACTN4)|87 (ACTN1)|102 (ADAM10)|135 (ADORA2A)|196 (AHR)|301 (ANXA1)|302 (ANXA2)|309 (ANXA6)|310 (ANXA7)|666 (BOK)|839 (CASP6)|857 (CAV1)|1003 (CDH5)|1317 (SLC31A1)|1495 (CTNNA1)|1803 (DPP4)|1889 (ECE1)|2022 (ENG)|2113 (ETS1)|2324 (FLT4)|2335 (FN1)|2634 (GBP2)|2886 (GRB7)|3251 (HPRT1)|3315 (HSPB1)|3480 (IGF1R)|3717 (JAK2)|3759 (KCNJ2)|3791 (KDR)|3953 (LEPR)|4091 (SMAD6)|4843 (NOS2)|4…
	EC	GO|GO.BP	GO:1902533	positive regulation of intracellular signal transduction	1.16326e-08	0.00132566	55	81 (ACTN4)|389 (RHOC)|666 (BOK)|857 (CAV1)|958 (CD40)|1848 (DUSP6)|1893 (ECM1)|1942 (EFNA1)|2022 (ENG)|2050 (EPHB4)|2149 (F2R)|2321 (FLT1)|2324 (FLT4)|2651 (GCNT2)|2828 (GPR4)|3090 (HIC1)|3356 (HTR2A)|3480 (IGF1R)|3672 (ITGA1)|3688 (ITGB1)|3717 (JAK2)|3791 (KDR)|3987 (LIMS1)|4254 (KITLG)|4487 (MSX1)|4690 (NCK1)|4881 (NPR1)|5175 (PECAM1)|5871 (MAP4K2)|5979 (RET)|6788 (STK3)|7010 (TEK)|7074 (TIAM1)…
	EC	GO|GO.BP	GO:0008219	cell death	1.16341e-08	0.00132582	91	81 (ACTN4)|87 (ACTN1)|102 (ADAM10)|135 (ADORA2A)|196 (AHR)|301 (ANXA1)|308 (ANXA5)|309 (ANXA6)|663 (BNIP2)|666 (BOK)|831 (CAST)|839 (CASP6)|840 (CASP7)|857 (CAV1)|947 (CD34)|958 (CD40)|1285 (COL4A3)|1495 (CTNNA1)|1848 (DUSP6)|1942 (EFNA1)|2012 (EMP1)|2050 (EPHB4)|2122 (MECOM)|2149 (F2R)|2296 (FOXC1)|2321 (FLT1)|2324 (FLT4)|2624 (GATA2)|2869 (GRK5)|3090 (HIC1)|3315 (HSPB1)|3356 (HTR2A)|3480 (IGF1R…
	EC	GO|GO.BP	GO:0010810	regulation of cell-substrate adhesion	1.16646e-08	0.00132929	21	81 (ACTN4)|94 (ACVRL1)|182 (JAG1)|285 (ANGPT2)|1842 (ECM2)|2335 (FN1)|2651 (GCNT2)|3717 (JAK2)|3791 (KDR)|3987 (LIMS1)|4811 (NID1)|7010 (TEK)|7402 (UTRN)|7448 (VTN)|8322 (FZD4)|8826 (IQGAP1)|10395 (DLC1)|22915 (MMRN1)|29984 (RHOD)|79812 (MMRN2)|340485 (ACER2)
	EC	GO|GO.BP	GO:0051241	negative regulation of multicellular organismal process	1.2455e-08	0.00141937	61	94 (ACVRL1)|182 (JAG1)|285 (ANGPT2)|301 (ANXA1)|302 (ANXA2)|308 (ANXA5)|947 (CD34)|1285 (COL4A3)|1495 (CTNNA1)|1893 (ECM1)|1942 (EFNA1)|2149 (F2R)|2296 (FOXC1)|2335 (FN1)|2615 (LRRC32)|2624 (GATA2)|2702 (GJA5)|2828 (GPR4)|3339 (HSPG2)|3717 (JAK2)|3910 (LAMA4)|4017 (LOXL2)|4091 (SMAD6)|4831 (NME2)|4846 (NOS3)|4881 (NPR1)|4982 (TNFRSF11B)|5552 (SRGN)|5743 (PTGS2)|6591 (SNAI2)|6781 (STC1)|6788 (STK3…
	EC	GO|GO.BP	GO:0001570	vasculogenesis	1.57962e-08	0.00180013	13	187 (APLNR)|857 (CAV1)|947 (CD34)|2022 (ENG)|3791 (KDR)|4643 (MYO1E)|7049 (TGFBR3)|7075 (TIE1)|8322 (FZD4)|8463 (TEAD2)|51162 (EGFL7)|57493 (HEG1)|64321 (SOX17)
	EC	GO|GO.BP	GO:0043067	regulation of programmed cell death	1.73379e-08	0.00197582	71	81 (ACTN4)|87 (ACTN1)|102 (ADAM10)|135 (ADORA2A)|301 (ANXA1)|308 (ANXA5)|663 (BNIP2)|666 (BOK)|831 (CAST)|839 (CASP6)|857 (CAV1)|958 (CD40)|1285 (COL4A3)|1495 (CTNNA1)|1848 (DUSP6)|1942 (EFNA1)|2050 (EPHB4)|2122 (MECOM)|2149 (F2R)|2296 (FOXC1)|2321 (FLT1)|2324 (FLT4)|2624 (GATA2)|2869 (GRK5)|3315 (HSPB1)|3480 (IGF1R)|3665 (IRF7)|3672 (ITGA1)|3688 (ITGB1)|3717 (JAK2)|3791 (KDR)|4091 (SMAD6)|4254 (…
	EC	GO|GO.BP	GO:0051336	regulation of hydrolase activity	2.27874e-08	0.00259685	61	135 (ADORA2A)|301 (ANXA1)|389 (RHOC)|663 (BNIP2)|666 (BOK)|831 (CAST)|857 (CAV1)|871 (SERPINH1)|958 (CD40)|1285 (COL4A3)|1378 (CR1)|1893 (ECM1)|1942 (EFNA1)|2149 (F2R)|2321 (FLT1)|2335 (FN1)|3356 (HTR2A)|3672 (ITGA1)|3688 (ITGB1)|3717 (JAK2)|3953 (LEPR)|3987 (LIMS1)|4846 (NOS3)|5265 (SERPINA1)|5269 (SERPINB6)|5272 (SERPINB9)|5743 (PTGS2)|6002 (RGS12)|6300 (MAPK12)|6917 (TCEA1)|7035 (TFPI)|7074 (T…
	EC	GO|GO.BP	GO:0009887	animal organ morphogenesis	2.43147e-08	0.0027709	51	94 (ACVRL1)|182 (JAG1)|302 (ANXA2)|309 (ANXA6)|682 (BSG)|857 (CAV1)|871 (SERPINH1)|947 (CD34)|1495 (CTNNA1)|1942 (EFNA1)|2022 (ENG)|2050 (EPHB4)|2296 (FOXC1)|2313 (FLI1)|2624 (GATA2)|2702 (GJA5)|3714 (JAG2)|3911 (LAMA5)|3912 (LAMB1)|3983 (ABLIM1)|4091 (SMAD6)|4124 (MAN2A1)|4256 (MGP)|4487 (MSX1)|4638 (MYLK)|4846 (NOS3)|4982 (TNFRSF11B)|6591 (SNAI2)|6781 (STC1)|6909 (TBX2)|6926 (TBX3)|7010 (TEK)|7…
	EC	GO|GO.BP	GO:0006915	apoptotic process	2.71016e-08	0.0030885	82	81 (ACTN4)|87 (ACTN1)|102 (ADAM10)|135 (ADORA2A)|196 (AHR)|301 (ANXA1)|308 (ANXA5)|309 (ANXA6)|663 (BNIP2)|666 (BOK)|831 (CAST)|839 (CASP6)|840 (CASP7)|857 (CAV1)|958 (CD40)|1285 (COL4A3)|1495 (CTNNA1)|1848 (DUSP6)|1942 (EFNA1)|2050 (EPHB4)|2122 (MECOM)|2149 (F2R)|2296 (FOXC1)|2321 (FLT1)|2324 (FLT4)|2624 (GATA2)|2869 (GRK5)|3090 (HIC1)|3315 (HSPB1)|3480 (IGF1R)|3665 (IRF7)|3672 (ITGA1)|3688 (ITG…
	EC	GO|GO.CC	GO:0031410	cytoplasmic vesicle	2.71993e-08	0.00309963	91	81 (ACTN4)|87 (ACTN1)|102 (ADAM10)|301 (ANXA1)|302 (ANXA2)|306 (ANXA3)|309 (ANXA6)|310 (ANXA7)|633 (BGN)|666 (BOK)|682 (BSG)|762 (CA4)|822 (CAPG)|857 (CAV1)|966 (CD59)|1258 (CNGB1)|1317 (SLC31A1)|1378 (CR1)|1495 (CTNNA1)|1604 (CD55)|1803 (DPP4)|1889 (ECE1)|1893 (ECM1)|2149 (F2R)|2321 (FLT1)|2335 (FN1)|2444 (FRK)|3356 (HTR2A)|3454 (IFNAR1)|3614 (IMPDH1)|3665 (IRF7)|3672 (ITGA1)|3688 (ITGB1)|3708 (…
	EC	GO|GO.MF	GO:0005488	binding	2.72599e-08	0.00310654	389	32 (ACACB)|81 (ACTN4)|87 (ACTN1)|94 (ACVRL1)|102 (ADAM10)|125 (ADH1B)|135 (ADORA2A)|182 (JAG1)|196 (AHR)|285 (ANGPT2)|301 (ANXA1)|302 (ANXA2)|306 (ANXA3)|308 (ANXA5)|309 (ANXA6)|310 (ANXA7)|368 (ABCC6)|389 (RHOC)|633 (BGN)|663 (BNIP2)|666 (BOK)|682 (BSG)|689 (BTF3)|762 (CA4)|822 (CAPG)|831 (CAST)|839 (CASP6)|840 (CASP7)|857 (CAV1)|871 (SERPINH1)|901 (CCNG2)|947 (CD34)|958 (CD40)|966 (CD59)|977 (C…
	EC	GO|GO.BP	GO:0042981	regulation of apoptotic process	2.74724e-08	0.00313075	70	81 (ACTN4)|87 (ACTN1)|102 (ADAM10)|135 (ADORA2A)|301 (ANXA1)|308 (ANXA5)|663 (BNIP2)|666 (BOK)|831 (CAST)|839 (CASP6)|857 (CAV1)|958 (CD40)|1285 (COL4A3)|1495 (CTNNA1)|1848 (DUSP6)|1942 (EFNA1)|2050 (EPHB4)|2149 (F2R)|2296 (FOXC1)|2321 (FLT1)|2324 (FLT4)|2624 (GATA2)|2869 (GRK5)|3315 (HSPB1)|3480 (IGF1R)|3665 (IRF7)|3672 (ITGA1)|3688 (ITGB1)|3717 (JAK2)|3791 (KDR)|4091 (SMAD6)|4254 (KITLG)|4487 (…
	EC	GO|GO.BP	GO:0044093	positive regulation of molecular function	2.85194e-08	0.00325008	75	81 (ACTN4)|302 (ANXA2)|306 (ANXA3)|389 (RHOC)|663 (BNIP2)|666 (BOK)|857 (CAV1)|958 (CD40)|1163 (CKS1B)|1285 (COL4A3)|1378 (CR1)|1848 (DUSP6)|1942 (EFNA1)|2149 (F2R)|2296 (FOXC1)|2321 (FLT1)|2335 (FN1)|3356 (HTR2A)|3646 (EIF3E)|3672 (ITGA1)|3688 (ITGB1)|3717 (JAK2)|3987 (LIMS1)|4254 (KITLG)|4258 (MGST2)|4843 (NOS2)|4846 (NOS3)|5243 (ABCB1)|5583 (PRKCH)|5871 (MAP4K2)|5979 (RET)|6002 (RGS12)|6300 (M…
	EC	GO|GO.CC	GO:0097708	intracellular vesicle	2.89517e-08	0.00329934	91	81 (ACTN4)|87 (ACTN1)|102 (ADAM10)|301 (ANXA1)|302 (ANXA2)|306 (ANXA3)|309 (ANXA6)|310 (ANXA7)|633 (BGN)|666 (BOK)|682 (BSG)|762 (CA4)|822 (CAPG)|857 (CAV1)|966 (CD59)|1258 (CNGB1)|1317 (SLC31A1)|1378 (CR1)|1495 (CTNNA1)|1604 (CD55)|1803 (DPP4)|1889 (ECE1)|1893 (ECM1)|2149 (F2R)|2321 (FLT1)|2335 (FN1)|2444 (FRK)|3356 (HTR2A)|3454 (IFNAR1)|3614 (IMPDH1)|3665 (IRF7)|3672 (ITGA1)|3688 (ITGB1)|3708 (…
	EC	GO|GO.BP	GO:0010941	regulation of cell death	3.12077e-08	0.00355643	74	81 (ACTN4)|87 (ACTN1)|102 (ADAM10)|135 (ADORA2A)|301 (ANXA1)|308 (ANXA5)|663 (BNIP2)|666 (BOK)|831 (CAST)|839 (CASP6)|857 (CAV1)|947 (CD34)|958 (CD40)|1285 (COL4A3)|1495 (CTNNA1)|1848 (DUSP6)|1942 (EFNA1)|2050 (EPHB4)|2122 (MECOM)|2149 (F2R)|2296 (FOXC1)|2321 (FLT1)|2324 (FLT4)|2624 (GATA2)|2869 (GRK5)|3315 (HSPB1)|3480 (IGF1R)|3665 (IRF7)|3672 (ITGA1)|3688 (ITGB1)|3717 (JAK2)|3791 (KDR)|4091 (SM…
	EC	GO|GO.BP	GO:0050790	regulation of catalytic activity	3.27857e-08	0.00373626	91	32 (ACACB)|135 (ADORA2A)|301 (ANXA1)|302 (ANXA2)|306 (ANXA3)|308 (ANXA5)|389 (RHOC)|663 (BNIP2)|666 (BOK)|831 (CAST)|857 (CAV1)|871 (SERPINH1)|901 (CCNG2)|958 (CD40)|1030 (CDKN2B)|1033 (CDKN3)|1163 (CKS1B)|1285 (COL4A3)|1378 (CR1)|1848 (DUSP6)|1893 (ECM1)|1942 (EFNA1)|2149 (F2R)|2321 (FLT1)|2335 (FN1)|3315 (HSPB1)|3356 (HTR2A)|3480 (IGF1R)|3672 (ITGA1)|3688 (ITGB1)|3717 (JAK2)|3953 (LEPR)|3987 (L…
	EC	GO|GO.CC	GO:0031224	intrinsic component of membrane	4.00852e-08	0.00456811	176	94 (ACVRL1)|102 (ADAM10)|135 (ADORA2A)|182 (JAG1)|187 (APLNR)|368 (ABCC6)|419 (ART3)|666 (BOK)|682 (BSG)|762 (CA4)|857 (CAV1)|947 (CD34)|958 (CD40)|966 (CD59)|977 (CD151)|1003 (CDH5)|1258 (CNGB1)|1317 (SLC31A1)|1349 (COX7B)|1378 (CR1)|1604 (CD55)|1803 (DPP4)|1889 (ECE1)|1942 (EFNA1)|2012 (EMP1)|2050 (EPHB4)|2149 (F2R)|2321 (FLT1)|2324 (FLT4)|2615 (LRRC32)|2651 (GCNT2)|2701 (GJA4)|2702 (GJA5)|2826…
	EC	GO|GO.BP	GO:0007596	blood coagulation	4.50171e-08	0.00513014	26	135 (ADORA2A)|302 (ANXA2)|308 (ANXA5)|857 (CAV1)|947 (CD34)|958 (CD40)|966 (CD59)|2149 (F2R)|2624 (GATA2)|3315 (HSPB1)|3708 (ITPR1)|3717 (JAK2)|4846 (NOS3)|5265 (SERPINA1)|5547 (PRCP)|5583 (PRKCH)|7035 (TFPI)|7056 (THBD)|7448 (VTN)|7450 (VWF)|8323 (FZD6)|10544 (PROCR)|22915 (MMRN1)|30846 (EHD2)|160851 (DGKH)|375033 (PEAR1)
	EC	GO|GO.BP	GO:0002009	morphogenesis of an epithelium	4.76355e-08	0.00542854	32	94 (ACVRL1)|182 (JAG1)|389 (RHOC)|977 (CD151)|1282 (COL4A1)|2022 (ENG)|3714 (JAG2)|3911 (LAMA5)|5420 (PODXL)|5979 (RET)|6591 (SNAI2)|6788 (STK3)|6909 (TBX2)|6926 (TBX3)|7041 (TGFB1I1)|7074 (TIAM1)|7424 (VEGFC)|7547 (ZIC3)|8322 (FZD4)|8323 (FZD6)|8463 (TEAD2)|8915 (BCL10)|10395 (DLC1)|11235 (PDCD10)|25865 (PRKD2)|51176 (LEF1)|54567 (DLL4)|64321 (SOX17)|79191 (IRX3)|90627 (STARD13)|115908 (CTHRC1)|…
	EC	GO|GO.BP	GO:0045597	positive regulation of cell differentiation	4.86131e-08	0.00553995	50	94 (ACVRL1)|182 (JAG1)|301 (ANXA1)|302 (ANXA2)|663 (BNIP2)|947 (CD34)|1003 (CDH5)|1495 (CTNNA1)|2022 (ENG)|2113 (ETS1)|2296 (FOXC1)|2335 (FN1)|2624 (GATA2)|2651 (GCNT2)|3356 (HTR2A)|3717 (JAK2)|3791 (KDR)|3987 (LIMS1)|4017 (LOXL2)|4124 (MAN2A1)|4254 (KITLG)|4690 (NCK1)|4831 (NME2)|5583 (PRKCH)|5743 (PTGS2)|5979 (RET)|6300 (MAPK12)|6591 (SNAI2)|6788 (STK3)|7041 (TGFB1I1)|7074 (TIAM1)|7122 (CLDN5)|…
	EC	GO|GO.BP	GO:0060485	mesenchyme development	4.96392e-08	0.00565689	23	94 (ACVRL1)|182 (JAG1)|309 (ANXA6)|1942 (EFNA1)|2022 (ENG)|2296 (FOXC1)|2651 (GCNT2)|3911 (LAMA5)|4017 (LOXL2)|4254 (KITLG)|4487 (MSX1)|4846 (NOS3)|5979 (RET)|6591 (SNAI2)|6909 (TBX2)|7041 (TGFB1I1)|7049 (TGFBR3)|7074 (TIAM1)|8463 (TEAD2)|8482 (SEMA7A)|25805 (BAMBI)|25937 (WWTR1)|51176 (LEF1)
	EC	GO|GO.CC	GO:0009897	external side of plasma membrane	5.04564e-08	0.00575001	27	301 (ANXA1)|308 (ANXA5)|762 (CA4)|947 (CD34)|958 (CD40)|966 (CD59)|1889 (ECE1)|2022 (ENG)|2826 (CCR10)|3554 (IL1R1)|3672 (ITGA1)|3688 (ITGB1)|3953 (LEPR)|4059 (BCAM)|5175 (PECAM1)|7037 (TFRC)|7049 (TGFBR3)|8482 (SEMA7A)|9180 (OSMR)|9466 (IL27RA)|10495 (ENOX2)|57493 (HEG1)|80741 (LY6G5C)|114908 (TMEM123)|118429 (ANTXR2)|161198 (CLEC14A)|338328 (GPIHBP1)
	EC	GO|GO.CC	GO:0098805	whole membrane	5.2997e-08	0.00603953	71	32 (ACACB)|102 (ADAM10)|301 (ANXA1)|302 (ANXA2)|306 (ANXA3)|309 (ANXA6)|310 (ANXA7)|368 (ABCC6)|666 (BOK)|682 (BSG)|762 (CA4)|857 (CAV1)|871 (SERPINH1)|966 (CD59)|1258 (CNGB1)|1378 (CR1)|1495 (CTNNA1)|1604 (CD55)|1803 (DPP4)|1889 (ECE1)|2149 (F2R)|3356 (HTR2A)|3665 (IRF7)|3672 (ITGA1)|3688 (ITGB1)|3708 (ITPR1)|3717 (JAK2)|3784 (KCNQ1)|3791 (KDR)|4128 (MAOA)|4846 (NOS3)|4935 (GPR143)|5175 (PECAM1)…
	EC	GO|GO.BP	GO:0002042	cell migration involved in sprouting angiogenesis	5.99296e-08	0.00682958	14	301 (ANXA1)|2050 (EPHB4)|2624 (GATA2)|3688 (ITGB1)|3791 (KDR)|5743 (PTGS2)|10769 (PLK2)|11235 (PDCD10)|29775 (CARD10)|54567 (DLL4)|57381 (RHOJ)|79812 (MMRN2)|90627 (STARD13)|161198 (CLEC14A)
	EC	GO|GO.BP	GO:0009790	embryo development	6.37443e-08	0.0072643	49	94 (ACVRL1)|102 (ADAM10)|187 (APLNR)|1889 (ECE1)|1942 (EFNA1)|2022 (ENG)|2296 (FOXC1)|2321 (FLT1)|2335 (FN1)|2624 (GATA2)|2702 (GJA5)|3688 (ITGB1)|3714 (JAG2)|3791 (KDR)|3910 (LAMA4)|3911 (LAMA5)|3912 (LAMB1)|4091 (SMAD6)|4124 (MAN2A1)|4254 (KITLG)|4487 (MSX1)|4628 (MYH10)|4643 (MYO1E)|4846 (NOS3)|5979 (RET)|6788 (STK3)|6909 (TBX2)|6926 (TBX3)|7041 (TGFB1I1)|7075 (TIE1)|7424 (VEGFC)|7448 (VTN)|75…
	EC	GO|GO.BP	GO:0050817	coagulation	6.43056e-08	0.00732827	26	135 (ADORA2A)|302 (ANXA2)|308 (ANXA5)|857 (CAV1)|947 (CD34)|958 (CD40)|966 (CD59)|2149 (F2R)|2624 (GATA2)|3315 (HSPB1)|3708 (ITPR1)|3717 (JAK2)|4846 (NOS3)|5265 (SERPINA1)|5547 (PRCP)|5583 (PRKCH)|7035 (TFPI)|7056 (THBD)|7448 (VTN)|7450 (VWF)|8323 (FZD6)|10544 (PROCR)|22915 (MMRN1)|30846 (EHD2)|160851 (DGKH)|375033 (PEAR1)
	EC	GO|GO.BP	GO:0003007	heart morphogenesis	7.2121e-08	0.00821891	22	94 (ACVRL1)|182 (JAG1)|1942 (EFNA1)|2022 (ENG)|2050 (EPHB4)|2296 (FOXC1)|2702 (GJA5)|4091 (SMAD6)|4487 (MSX1)|4846 (NOS3)|6591 (SNAI2)|6909 (TBX2)|6926 (TBX3)|7010 (TEK)|7049 (TGFBR3)|7122 (CLDN5)|7547 (ZIC3)|8463 (TEAD2)|10395 (DLC1)|54567 (DLL4)|57493 (HEG1)|64321 (SOX17)
	EC	GO|GO.BP	GO:0080134	regulation of response to stress	7.64946e-08	0.00871732	65	135 (ADORA2A)|301 (ANXA1)|302 (ANXA2)|308 (ANXA5)|666 (BOK)|857 (CAV1)|947 (CD34)|966 (CD59)|1003 (CDH5)|1378 (CR1)|1604 (CD55)|2113 (ETS1)|2122 (MECOM)|2149 (F2R)|2324 (FLT4)|3090 (HIC1)|3315 (HSPB1)|3384 (ICAM2)|3426 (CFI)|3480 (IGF1R)|3554 (IL1R1)|3665 (IRF7)|3717 (JAK2)|4258 (MGST2)|4487 (MSX1)|4638 (MYLK)|4690 (NCK1)|4843 (NOS2)|4846 (NOS3)|5074 (PAWR)|5243 (ABCB1)|5272 (SERPINB9)|5743 (PTGS…
	EC	GO|GO.BP	GO:0050794	regulation of cellular process	7.66236e-08	0.00873203	299	32 (ACACB)|81 (ACTN4)|87 (ACTN1)|94 (ACVRL1)|102 (ADAM10)|135 (ADORA2A)|182 (JAG1)|187 (APLNR)|196 (AHR)|285 (ANGPT2)|301 (ANXA1)|302 (ANXA2)|306 (ANXA3)|308 (ANXA5)|309 (ANXA6)|310 (ANXA7)|389 (RHOC)|663 (BNIP2)|666 (BOK)|682 (BSG)|822 (CAPG)|831 (CAST)|839 (CASP6)|857 (CAV1)|871 (SERPINH1)|901 (CCNG2)|947 (CD34)|958 (CD40)|966 (CD59)|977 (CD151)|1003 (CDH5)|1030 (CDKN2B)|1033 (CDKN3)|1163 (CKS1…
	EC	GO|GO.BP	GO:0065007	biological regulation	8.3824e-08	0.00955258	336	32 (ACACB)|81 (ACTN4)|87 (ACTN1)|94 (ACVRL1)|102 (ADAM10)|135 (ADORA2A)|182 (JAG1)|187 (APLNR)|196 (AHR)|285 (ANGPT2)|301 (ANXA1)|302 (ANXA2)|306 (ANXA3)|308 (ANXA5)|309 (ANXA6)|310 (ANXA7)|389 (RHOC)|663 (BNIP2)|666 (BOK)|682 (BSG)|822 (CAPG)|831 (CAST)|839 (CASP6)|857 (CAV1)|871 (SERPINH1)|901 (CCNG2)|947 (CD34)|958 (CD40)|966 (CD59)|977 (CD151)|1003 (CDH5)|1030 (CDKN2B)|1033 (CDKN3)|1163 (CKS1…
	EC	GO|GO.BP	GO:0010604	positive regulation of macromolecule metabolic process	8.64723e-08	0.00985438	118	81 (ACTN4)|87 (ACTN1)|94 (ACVRL1)|182 (JAG1)|187 (APLNR)|196 (AHR)|302 (ANXA2)|306 (ANXA3)|666 (BOK)|857 (CAV1)|947 (CD34)|958 (CD40)|1030 (CDKN2B)|1163 (CKS1B)|1285 (COL4A3)|1378 (CR1)|1390 (CREM)|1848 (DUSP6)|1879 (EBF1)|1889 (ECE1)|1942 (EFNA1)|1997 (ELF1)|2022 (ENG)|2050 (EPHB4)|2078 (ERG)|2113 (ETS1)|2122 (MECOM)|2149 (F2R)|2296 (FOXC1)|2313 (FLI1)|2321 (FLT1)|2324 (FLT4)|2335 (FN1)|2615 (LR…
	EC	GO|GO.BP	GO:0052547	regulation of peptidase activity	8.94659e-08	0.0101955	30	135 (ADORA2A)|666 (BOK)|831 (CAST)|857 (CAV1)|871 (SERPINH1)|1285 (COL4A3)|1378 (CR1)|1893 (ECM1)|1942 (EFNA1)|2149 (F2R)|2335 (FN1)|3717 (JAK2)|5265 (SERPINA1)|5269 (SERPINB6)|5272 (SERPINB9)|5743 (PTGS2)|6300 (MAPK12)|7035 (TFPI)|7076 (TIMP1)|7448 (VTN)|8737 (RIPK1)|8915 (BCL10)|10395 (DLC1)|51176 (LEF1)|58189 (WFDC1)|83595 (SOX7)|135228 (CD109)|340267 (COL28A1)|340485 (ACER2)|100506742 (CASP12)
	EC	GO|GO.BP	GO:0010648	negative regulation of cell communication	9.04979e-08	0.0103131	62	187 (APLNR)|308 (ANXA5)|666 (BOK)|857 (CAV1)|1495 (CTNNA1)|1848 (DUSP6)|1893 (ECM1)|1942 (EFNA1)|1997 (ELF1)|2050 (EPHB4)|2122 (MECOM)|2321 (FLT1)|2324 (FLT4)|2624 (GATA2)|2887 (GRB10)|3090 (HIC1)|3315 (HSPB1)|3356 (HTR2A)|3480 (IGF1R)|3672 (ITGA1)|3688 (ITGB1)|3708 (ITPR1)|3791 (KDR)|4091 (SMAD6)|4690 (NCK1)|4846 (NOS3)|5074 (PAWR)|5743 (PTGS2)|5979 (RET)|6002 (RGS12)|6591 (SNAI2)|6788 (STK3)|70…
	EC	GO|GO.BP	GO:0023057	negative regulation of signaling	1.00423e-07	0.0114442	62	187 (APLNR)|308 (ANXA5)|666 (BOK)|857 (CAV1)|1495 (CTNNA1)|1848 (DUSP6)|1893 (ECM1)|1942 (EFNA1)|1997 (ELF1)|2050 (EPHB4)|2122 (MECOM)|2321 (FLT1)|2324 (FLT4)|2624 (GATA2)|2887 (GRB10)|3090 (HIC1)|3315 (HSPB1)|3356 (HTR2A)|3480 (IGF1R)|3672 (ITGA1)|3688 (ITGB1)|3708 (ITPR1)|3791 (KDR)|4091 (SMAD6)|4690 (NCK1)|4846 (NOS3)|5074 (PAWR)|5743 (PTGS2)|5979 (RET)|6002 (RGS12)|6591 (SNAI2)|6788 (STK3)|70…
	EC	GO|GO.BP	GO:0010595	positive regulation of endothelial cell migration	1.03575e-07	0.0118034	15	301 (ANXA1)|306 (ANXA3)|958 (CD40)|2113 (ETS1)|2324 (FLT4)|2624 (GATA2)|3315 (HSPB1)|3791 (KDR)|4846 (NOS3)|5743 (PTGS2)|7010 (TEK)|7424 (VEGFC)|10769 (PLK2)|25865 (PRKD2)|57381 (RHOJ)
	EC	GO|GO.MF	GO:0044877	protein-containing complex binding	1.05319e-07	0.0120021	53	81 (ACTN4)|87 (ACTN1)|94 (ACVRL1)|102 (ADAM10)|196 (AHR)|309 (ANXA6)|310 (ANXA7)|822 (CAPG)|871 (SERPINH1)|977 (CD151)|1285 (COL4A3)|1495 (CTNNA1)|1842 (ECM2)|2022 (ENG)|2335 (FN1)|2887 (GRB10)|3356 (HTR2A)|3384 (ICAM2)|3480 (IGF1R)|3672 (ITGA1)|3688 (ITGB1)|3791 (KDR)|3911 (LAMA5)|3983 (ABLIM1)|4628 (MYH10)|4643 (MYO1E)|4811 (NID1)|4831 (NME2)|5358 (PLS3)|6237 (RRAS)|7049 (TGFBR3)|7402 (UTRN)|74…
	EC	GO|GO.BP	GO:0010718	positive regulation of epithelial to mesenchymal transition	1.12579e-07	0.0128295	10	182 (JAG1)|2022 (ENG)|2296 (FOXC1)|2651 (GCNT2)|4017 (LOXL2)|7041 (TGFB1I1)|7074 (TIAM1)|25805 (BAMBI)|25937 (WWTR1)|51176 (LEF1)
	EC	GO|GO.BP	GO:0007043	cell-cell junction assembly	1.15565e-07	0.0131698	15	81 (ACTN4)|389 (RHOC)|857 (CAV1)|1003 (CDH5)|1495 (CTNNA1)|2701 (GJA4)|2702 (GJA5)|5583 (PRKCH)|6591 (SNAI2)|7122 (CLDN5)|51599 (LSR)|57493 (HEG1)|143098 (MPP7)|153562 (MARVELD2)|100506658 (OCLN)
	EC	GO|GO.BP	GO:0048010	vascular endothelial growth factor receptor signaling pathway	1.23856e-07	0.0141146	13	2296 (FOXC1)|2321 (FLT1)|2324 (FLT4)|2887 (GRB10)|3315 (HSPB1)|3791 (KDR)|4690 (NCK1)|7424 (VEGFC)|7448 (VTN)|8322 (FZD4)|25865 (PRKD2)|26509 (MYOF)|79812 (MMRN2)
	EC	GO|GO.BP	GO:0051173	positive regulation of nitrogen compound metabolic process	1.31684e-07	0.0150067	113	81 (ACTN4)|87 (ACTN1)|94 (ACVRL1)|182 (JAG1)|187 (APLNR)|196 (AHR)|302 (ANXA2)|306 (ANXA3)|666 (BOK)|857 (CAV1)|958 (CD40)|1030 (CDKN2B)|1163 (CKS1B)|1285 (COL4A3)|1378 (CR1)|1390 (CREM)|1848 (DUSP6)|1879 (EBF1)|1942 (EFNA1)|1997 (ELF1)|2022 (ENG)|2050 (EPHB4)|2078 (ERG)|2113 (ETS1)|2122 (MECOM)|2149 (F2R)|2296 (FOXC1)|2313 (FLI1)|2321 (FLT1)|2324 (FLT4)|2335 (FN1)|2624 (GATA2)|2651 (GCNT2)|3251 …
	EC	GO|GO.CC	GO:0098552	side of membrane	1.38365e-07	0.015768	34	301 (ANXA1)|308 (ANXA5)|762 (CA4)|947 (CD34)|958 (CD40)|966 (CD59)|1889 (ECE1)|2022 (ENG)|2444 (FRK)|2791 (GNG11)|2826 (CCR10)|3554 (IL1R1)|3672 (ITGA1)|3688 (ITGB1)|3953 (LEPR)|4059 (BCAM)|5175 (PECAM1)|7037 (TFRC)|7049 (TGFBR3)|7074 (TIAM1)|7525 (YES1)|8482 (SEMA7A)|8826 (IQGAP1)|9180 (OSMR)|9466 (IL27RA)|10495 (ENOX2)|57477 (SHROOM4)|57488 (ESYT2)|57493 (HEG1)|80741 (LY6G5C)|114908 (TMEM123)|1…
	EC	GO|GO.CC	GO:0005901	caveola	1.4206e-07	0.0161891	12	857 (CAV1)|1495 (CTNNA1)|2149 (F2R)|3356 (HTR2A)|3717 (JAK2)|4846 (NOS3)|5743 (PTGS2)|6513 (SLC2A1)|7035 (TFPI)|10395 (DLC1)|26509 (MYOF)|30846 (EHD2)
	EC	GO|GO.CC	GO:0016324	apical plasma membrane	1.46456e-07	0.0166901	24	182 (JAG1)|301 (ANXA1)|368 (ABCC6)|762 (CA4)|947 (CD34)|1803 (DPP4)|2335 (FN1)|4935 (GPR143)|5002 (SLC22A18)|5243 (ABCB1)|5420 (PODXL)|6513 (SLC2A1)|6781 (STC1)|7010 (TEK)|8323 (FZD6)|9180 (OSMR)|50507 (NOX4)|54716 (SLC6A20)|57477 (SHROOM4)|134549 (SHROOM1)|140803 (TRPM6)|153562 (MARVELD2)|338328 (GPIHBP1)|100506658 (OCLN)
	EC	GO|GO.BP	GO:0031325	positive regulation of cellular metabolic process	1.54203e-07	0.017573	116	32 (ACACB)|81 (ACTN4)|87 (ACTN1)|94 (ACVRL1)|182 (JAG1)|187 (APLNR)|196 (AHR)|301 (ANXA1)|302 (ANXA2)|306 (ANXA3)|666 (BOK)|857 (CAV1)|958 (CD40)|1030 (CDKN2B)|1163 (CKS1B)|1285 (COL4A3)|1378 (CR1)|1390 (CREM)|1848 (DUSP6)|1879 (EBF1)|1889 (ECE1)|1942 (EFNA1)|1997 (ELF1)|2022 (ENG)|2050 (EPHB4)|2078 (ERG)|2113 (ETS1)|2122 (MECOM)|2149 (F2R)|2296 (FOXC1)|2313 (FLI1)|2321 (FLT1)|2324 (FLT4)|2335 (F…
	EC	GO|GO.BP	GO:0009893	positive regulation of metabolic process	1.54589e-07	0.0176169	124	32 (ACACB)|81 (ACTN4)|87 (ACTN1)|94 (ACVRL1)|182 (JAG1)|187 (APLNR)|196 (AHR)|301 (ANXA1)|302 (ANXA2)|306 (ANXA3)|666 (BOK)|857 (CAV1)|947 (CD34)|958 (CD40)|1030 (CDKN2B)|1163 (CKS1B)|1285 (COL4A3)|1378 (CR1)|1390 (CREM)|1848 (DUSP6)|1879 (EBF1)|1889 (ECE1)|1942 (EFNA1)|1997 (ELF1)|2022 (ENG)|2050 (EPHB4)|2078 (ERG)|2113 (ETS1)|2122 (MECOM)|2149 (F2R)|2296 (FOXC1)|2313 (FLI1)|2321 (FLT1)|2324 (FL…
	EC	GO|GO.BP	GO:0006810	transport	1.55999e-07	0.0177777	163	32 (ACACB)|81 (ACTN4)|87 (ACTN1)|102 (ADAM10)|135 (ADORA2A)|187 (APLNR)|301 (ANXA1)|302 (ANXA2)|306 (ANXA3)|308 (ANXA5)|309 (ANXA6)|368 (ABCC6)|666 (BOK)|682 (BSG)|689 (BTF3)|762 (CA4)|857 (CAV1)|947 (CD34)|958 (CD40)|966 (CD59)|977 (CD151)|1258 (CNGB1)|1317 (SLC31A1)|1349 (COX7B)|1378 (CR1)|1604 (CD55)|1803 (DPP4)|1893 (ECM1)|2022 (ENG)|2149 (F2R)|2335 (FN1)|2444 (FRK)|2615 (LRRC32)|2624 (GATA2)…
	EC	GO|GO.BP	GO:0070848	response to growth factor	1.77279e-07	0.0202027	40	94 (ACVRL1)|285 (ANGPT2)|301 (ANXA1)|306 (ANXA3)|857 (CAV1)|1003 (CDH5)|1030 (CDKN2B)|1848 (DUSP6)|2022 (ENG)|2296 (FOXC1)|2321 (FLT1)|2324 (FLT4)|2615 (LRRC32)|2651 (GCNT2)|2887 (GRB10)|3315 (HSPB1)|3791 (KDR)|3987 (LIMS1)|4091 (SMAD6)|4487 (MSX1)|6591 (SNAI2)|7041 (TGFB1I1)|7049 (TGFBR3)|7122 (CLDN5)|7424 (VEGFC)|7448 (VTN)|7525 (YES1)|8322 (FZD4)|8737 (RIPK1)|8826 (IQGAP1)|8862 (APLN)|10094 (A…
	EC	GO|GO.BP	GO:0007167	enzyme linked receptor protein signaling pathway	1.78364e-07	0.0203263	50	94 (ACVRL1)|285 (ANGPT2)|857 (CAV1)|1003 (CDH5)|1030 (CDKN2B)|1282 (COL4A1)|1285 (COL4A3)|1942 (EFNA1)|2022 (ENG)|2050 (EPHB4)|2296 (FOXC1)|2321 (FLT1)|2324 (FLT4)|2444 (FRK)|2615 (LRRC32)|2651 (GCNT2)|2886 (GRB7)|2887 (GRB10)|3315 (HSPB1)|3480 (IGF1R)|3672 (ITGA1)|3717 (JAK2)|3791 (KDR)|4091 (SMAD6)|4487 (MSX1)|4643 (MYO1E)|4690 (NCK1)|4881 (NPR1)|5979 (RET)|7010 (TEK)|7041 (TGFB1I1)|7049 (TGFBR…
	EC	GO|GO.BP	GO:0043536	positive regulation of blood vessel endothelial cell migration	1.90076e-07	0.0216611	12	301 (ANXA1)|958 (CD40)|2113 (ETS1)|2624 (GATA2)|3315 (HSPB1)|3791 (KDR)|4846 (NOS3)|5743 (PTGS2)|7424 (VEGFC)|10769 (PLK2)|25865 (PRKD2)|57381 (RHOJ)
	EC	GO|GO.BP	GO:0002576	platelet degranulation	1.96588e-07	0.0224032	15	81 (ACTN4)|87 (ACTN1)|308 (ANXA5)|1893 (ECM1)|2335 (FN1)|5175 (PECAM1)|5265 (SERPINA1)|5552 (SRGN)|7076 (TIMP1)|7424 (VEGFC)|7450 (VWF)|10257 (ABCC4)|22915 (MMRN1)|94121 (SYTL4)|135228 (CD109)
	EC	GO|GO.BP	GO:0007507	heart development	2.10518e-07	0.0239907	34	32 (ACACB)|94 (ACVRL1)|182 (JAG1)|187 (APLNR)|302 (ANXA2)|1848 (DUSP6)|1889 (ECE1)|1942 (EFNA1)|2022 (ENG)|2050 (EPHB4)|2296 (FOXC1)|2702 (GJA5)|3688 (ITGB1)|3764 (KCNJ8)|4091 (SMAD6)|4487 (MSX1)|4628 (MYH10)|4846 (NOS3)|6591 (SNAI2)|6788 (STK3)|6909 (TBX2)|6926 (TBX3)|7010 (TEK)|7049 (TGFBR3)|7122 (CLDN5)|7547 (ZIC3)|8463 (TEAD2)|8862 (APLN)|10395 (DLC1)|50507 (NOX4)|54567 (DLL4)|56999 (ADAMTS9)…
	EC	GO|GO.BP	GO:0012501	programmed cell death	2.22212e-07	0.0253233	83	81 (ACTN4)|87 (ACTN1)|102 (ADAM10)|135 (ADORA2A)|196 (AHR)|301 (ANXA1)|308 (ANXA5)|309 (ANXA6)|663 (BNIP2)|666 (BOK)|831 (CAST)|839 (CASP6)|840 (CASP7)|857 (CAV1)|958 (CD40)|1285 (COL4A3)|1495 (CTNNA1)|1848 (DUSP6)|1942 (EFNA1)|2050 (EPHB4)|2122 (MECOM)|2149 (F2R)|2296 (FOXC1)|2321 (FLT1)|2324 (FLT4)|2624 (GATA2)|2869 (GRK5)|3090 (HIC1)|3315 (HSPB1)|3480 (IGF1R)|3665 (IRF7)|3672 (ITGA1)|3688 (ITG…
	EC	GO|GO.BP	GO:0072010	glomerular epithelium development	2.46184e-07	0.0280551	7	182 (JAG1)|947 (CD34)|2296 (FOXC1)|4643 (MYO1E)|5175 (PECAM1)|5420 (PODXL)|8826 (IQGAP1)
	EC	GO|GO.CC	GO:0044433	cytoplasmic vesicle part	2.71041e-07	0.0308878	64	81 (ACTN4)|87 (ACTN1)|102 (ADAM10)|301 (ANXA1)|302 (ANXA2)|306 (ANXA3)|309 (ANXA6)|310 (ANXA7)|666 (BOK)|682 (BSG)|762 (CA4)|857 (CAV1)|966 (CD59)|1258 (CNGB1)|1378 (CR1)|1604 (CD55)|1889 (ECE1)|1893 (ECM1)|2335 (FN1)|2444 (FRK)|3614 (IMPDH1)|3665 (IRF7)|3708 (ITPR1)|3717 (JAK2)|3784 (KCNQ1)|4831 (NME2)|4846 (NOS3)|4935 (GPR143)|5175 (PECAM1)|5265 (SERPINA1)|5269 (SERPINB6)|5547 (PRCP)|5552 (SRGN…
	EC	GO|GO.BP	GO:0010562	positive regulation of phosphorus metabolic process	2.85535e-07	0.0325396	53	94 (ACVRL1)|187 (APLNR)|302 (ANXA2)|857 (CAV1)|958 (CD40)|1163 (CKS1B)|1848 (DUSP6)|1942 (EFNA1)|2022 (ENG)|2050 (EPHB4)|2149 (F2R)|2321 (FLT1)|2324 (FLT4)|2651 (GCNT2)|3356 (HTR2A)|3480 (IGF1R)|3672 (ITGA1)|3717 (JAK2)|3791 (KDR)|4254 (KITLG)|4843 (NOS2)|4846 (NOS3)|5175 (PECAM1)|5743 (PTGS2)|5871 (MAP4K2)|5979 (RET)|6788 (STK3)|7010 (TEK)|7074 (TIAM1)|7075 (TIE1)|7164 (TPD52L1)|7424 (VEGFC)|744…
	EC	GO|GO.BP	GO:0045937	positive regulation of phosphate metabolic process	2.85535e-07	0.0325396	53	94 (ACVRL1)|187 (APLNR)|302 (ANXA2)|857 (CAV1)|958 (CD40)|1163 (CKS1B)|1848 (DUSP6)|1942 (EFNA1)|2022 (ENG)|2050 (EPHB4)|2149 (F2R)|2321 (FLT1)|2324 (FLT4)|2651 (GCNT2)|3356 (HTR2A)|3480 (IGF1R)|3672 (ITGA1)|3717 (JAK2)|3791 (KDR)|4254 (KITLG)|4843 (NOS2)|4846 (NOS3)|5175 (PECAM1)|5743 (PTGS2)|5871 (MAP4K2)|5979 (RET)|6788 (STK3)|7010 (TEK)|7074 (TIAM1)|7075 (TIE1)|7164 (TPD52L1)|7424 (VEGFC)|744…
	EC	GO|GO.BP	GO:0006811	ion transport	2.90424e-07	0.0330968	69	32 (ACACB)|81 (ACTN4)|135 (ADORA2A)|187 (APLNR)|301 (ANXA1)|302 (ANXA2)|306 (ANXA3)|308 (ANXA5)|309 (ANXA6)|368 (ABCC6)|682 (BSG)|762 (CA4)|857 (CAV1)|1258 (CNGB1)|1317 (SLC31A1)|1349 (COX7B)|2149 (F2R)|2701 (GJA4)|2702 (GJA5)|3356 (HTR2A)|3708 (ITPR1)|3759 (KCNJ2)|3764 (KCNJ8)|3784 (KCNQ1)|4638 (MYLK)|4843 (NOS2)|4846 (NOS3)|5002 (SLC22A18)|5243 (ABCB1)|5355 (PLP2)|5360 (PLTP)|5743 (PTGS2)|6513 …
	EC	GO|GO.BP	GO:0048762	mesenchymal cell differentiation	3.05042e-07	0.0347626	19	182 (JAG1)|309 (ANXA6)|1942 (EFNA1)|2022 (ENG)|2296 (FOXC1)|2651 (GCNT2)|3911 (LAMA5)|4017 (LOXL2)|4254 (KITLG)|4487 (MSX1)|5979 (RET)|6591 (SNAI2)|7041 (TGFB1I1)|7049 (TGFBR3)|7074 (TIAM1)|8482 (SEMA7A)|25805 (BAMBI)|25937 (WWTR1)|51176 (LEF1)
	EC	GO|GO.BP	GO:0048771	tissue remodeling	3.10817e-07	0.0354207	17	94 (ACVRL1)|182 (JAG1)|301 (ANXA1)|633 (BGN)|857 (CAV1)|2149 (F2R)|2296 (FOXC1)|2324 (FLT4)|2702 (GJA5)|3953 (LEPR)|4846 (NOS3)|4982 (TNFRSF11B)|7037 (TFRC)|7076 (TIMP1)|50507 (NOX4)|54567 (DLL4)|115908 (CTHRC1)
	EC	GO|GO.BP	GO:0001655	urogenital system development	3.31787e-07	0.0378104	24	182 (JAG1)|285 (ANGPT2)|301 (ANXA1)|947 (CD34)|1282 (COL4A1)|1285 (COL4A3)|2296 (FOXC1)|2624 (GATA2)|2828 (GPR4)|3764 (KCNJ8)|3911 (LAMA5)|4091 (SMAD6)|4643 (MYO1E)|4811 (NID1)|4953 (ODC1)|5175 (PECAM1)|5420 (PODXL)|5979 (RET)|7010 (TEK)|8826 (IQGAP1)|25937 (WWTR1)|64321 (SOX17)|79191 (IRX3)|282679 (AQP11)
	EC	GO|GO.BP	GO:0048598	embryonic morphogenesis	3.57167e-07	0.0407028	34	187 (APLNR)|1889 (ECE1)|1942 (EFNA1)|2022 (ENG)|2296 (FOXC1)|2321 (FLT1)|2335 (FN1)|2624 (GATA2)|2702 (GJA5)|3688 (ITGB1)|3714 (JAG2)|3911 (LAMA5)|3912 (LAMB1)|4487 (MSX1)|5979 (RET)|6788 (STK3)|6909 (TBX2)|6926 (TBX3)|7041 (TGFB1I1)|7424 (VEGFC)|7448 (VTN)|7547 (ZIC3)|8323 (FZD6)|8463 (TEAD2)|8862 (APLN)|8915 (BCL10)|10395 (DLC1)|51176 (LEF1)|54567 (DLL4)|64321 (SOX17)|79191 (IRX3)|83595 (SOX7)|…
	EC	GO|GO.BP	GO:0051247	positive regulation of protein metabolic process	3.61337e-07	0.0411779	70	94 (ACVRL1)|187 (APLNR)|302 (ANXA2)|666 (BOK)|857 (CAV1)|958 (CD40)|1163 (CKS1B)|1285 (COL4A3)|1378 (CR1)|1848 (DUSP6)|1942 (EFNA1)|2022 (ENG)|2050 (EPHB4)|2149 (F2R)|2321 (FLT1)|2324 (FLT4)|2335 (FN1)|2651 (GCNT2)|3315 (HSPB1)|3356 (HTR2A)|3480 (IGF1R)|3646 (EIF3E)|3672 (ITGA1)|3717 (JAK2)|3791 (KDR)|4254 (KITLG)|4690 (NCK1)|5074 (PAWR)|5175 (PECAM1)|5743 (PTGS2)|5871 (MAP4K2)|5979 (RET)|6300 (M…
	EC	GO|GO.BP	GO:0032270	positive regulation of cellular protein metabolic process	3.82594e-07	0.0436005	67	94 (ACVRL1)|187 (APLNR)|302 (ANXA2)|666 (BOK)|857 (CAV1)|958 (CD40)|1163 (CKS1B)|1285 (COL4A3)|1378 (CR1)|1848 (DUSP6)|1942 (EFNA1)|2022 (ENG)|2050 (EPHB4)|2149 (F2R)|2321 (FLT1)|2324 (FLT4)|2335 (FN1)|2651 (GCNT2)|3356 (HTR2A)|3480 (IGF1R)|3646 (EIF3E)|3672 (ITGA1)|3717 (JAK2)|3791 (KDR)|4254 (KITLG)|4690 (NCK1)|5175 (PECAM1)|5743 (PTGS2)|5871 (MAP4K2)|5979 (RET)|6300 (MAPK12)|6591 (SNAI2)|6788 …
	EC	GO|GO.BP	GO:0051234	establishment of localization	4.1807e-07	0.0476432	164	32 (ACACB)|81 (ACTN4)|87 (ACTN1)|102 (ADAM10)|135 (ADORA2A)|187 (APLNR)|301 (ANXA1)|302 (ANXA2)|306 (ANXA3)|308 (ANXA5)|309 (ANXA6)|368 (ABCC6)|666 (BOK)|682 (BSG)|689 (BTF3)|762 (CA4)|857 (CAV1)|947 (CD34)|958 (CD40)|966 (CD59)|977 (CD151)|1258 (CNGB1)|1317 (SLC31A1)|1349 (COX7B)|1378 (CR1)|1604 (CD55)|1803 (DPP4)|1893 (ECM1)|2022 (ENG)|2149 (F2R)|2335 (FN1)|2444 (FRK)|2615 (LRRC32)|2624 (GATA2)…
	A	GO|GO.BP	GO:0009887	animal organ morphogenesis	8.58928e-14	9.78834e-09	50	183 (AGT)|249 (ALPL)|658 (BMPR1B)|1363 (CPE)|1956 (EGFR)|2239 (GPC4)|2246 (FGF1)|2260 (FGFR1)|2263 (FGFR2)|2735 (GLI1)|2736 (GLI2)|2737 (GLI3)|3082 (HGF)|3371 (TNC)|3373 (HYAL1)|3400 (ID4)|3673 (ITGA2)|4211 (MEIS1)|4323 (MMP14)|4488 (MSX2)|4853 (NOTCH2)|5013 (OTX1)|5080 (PAX6)|5465 (PPARA)|5654 (HTRA1)|5764 (PTN)|6096 (RORB)|6422 (SFRP1)|6662 (SOX9)|7042 (TGFB2)|7289 (TULP3)|9231 (DLG5)|9620 (CEL…
	A	GO|GO.BP	GO:0007399	nervous system development	4.77616e-13	5.44292e-08	81	183 (AGT)|205 (AK4)|225 (ABCD2)|558 (AXL)|627 (BDNF)|658 (BMPR1B)|1404 (HAPLN1)|1463 (NCAN)|1821 (DRP2)|1956 (EGFR)|2049 (EPHB3)|2064 (ERBB2)|2173 (FABP7)|2239 (GPC4)|2260 (FGFR1)|2263 (FGFR2)|2353 (FOS)|2560 (GABRB1)|2670 (GFAP)|2735 (GLI1)|2736 (GLI2)|2737 (GLI3)|2746 (GLUD1)|3082 (HGF)|3371 (TNC)|3400 (ID4)|3908 (LAMA2)|4129 (MAOB)|4211 (MEIS1)|4323 (MMP14)|4853 (NOTCH2)|4854 (NOTCH3)|5013 (OT…
	A	GO|GO.BP	GO:0051239	regulation of multicellular organismal process	5.13482e-13	5.85164e-08	98	136 (ADORA2B)|183 (AGT)|225 (ABCD2)|477 (ATP1A2)|482 (ATP1B2)|558 (AXL)|627 (BDNF)|658 (BMPR1B)|1264 (CNN1)|1491 (CTH)|1545 (CYP1B1)|1734 (DIO2)|1956 (EGFR)|2013 (EMP2)|2049 (EPHB3)|2064 (ERBB2)|2239 (GPC4)|2246 (FGF1)|2260 (FGFR1)|2263 (FGFR2)|2353 (FOS)|2670 (GFAP)|2697 (GJA1)|2735 (GLI1)|2736 (GLI2)|2737 (GLI3)|3082 (HGF)|3373 (HYAL1)|3400 (ID4)|3606 (IL18)|3673 (ITGA2)|3781 (KCNN2)|3908 (LAMA…
	A	GO|GO.BP	GO:0048731	system development	6.3641e-12	7.25253e-07	128	183 (AGT)|205 (AK4)|225 (ABCD2)|249 (ALPL)|558 (AXL)|627 (BDNF)|658 (BMPR1B)|960 (CD44)|1363 (CPE)|1404 (HAPLN1)|1463 (NCAN)|1491 (CTH)|1545 (CYP1B1)|1821 (DRP2)|1956 (EGFR)|2013 (EMP2)|2049 (EPHB3)|2064 (ERBB2)|2173 (FABP7)|2239 (GPC4)|2246 (FGF1)|2260 (FGFR1)|2263 (FGFR2)|2353 (FOS)|2560 (GABRB1)|2670 (GFAP)|2697 (GJA1)|2735 (GLI1)|2736 (GLI2)|2737 (GLI3)|2746 (GLUD1)|3082 (HGF)|3371 (TNC)|3373…
	A	GO|GO.BP	GO:0048513	animal organ development	1.10497e-11	1.25923e-06	102	183 (AGT)|205 (AK4)|249 (ALPL)|558 (AXL)|658 (BMPR1B)|960 (CD44)|1363 (CPE)|1545 (CYP1B1)|1956 (EGFR)|2049 (EPHB3)|2064 (ERBB2)|2173 (FABP7)|2239 (GPC4)|2246 (FGF1)|2260 (FGFR1)|2263 (FGFR2)|2353 (FOS)|2697 (GJA1)|2735 (GLI1)|2736 (GLI2)|2737 (GLI3)|2746 (GLUD1)|3082 (HGF)|3371 (TNC)|3373 (HYAL1)|3400 (ID4)|3606 (IL18)|3673 (ITGA2)|3679 (ITGA7)|3908 (LAMA2)|4052 (LTBP1)|4129 (MAOB)|4211 (MEIS1)|4…
	A	GO|GO.BP	GO:0009653	anatomical structure morphogenesis	1.84908e-11	2.10721e-06	84	183 (AGT)|249 (ALPL)|558 (AXL)|627 (BDNF)|658 (BMPR1B)|960 (CD44)|1363 (CPE)|1545 (CYP1B1)|1956 (EGFR)|2013 (EMP2)|2049 (EPHB3)|2064 (ERBB2)|2239 (GPC4)|2246 (FGF1)|2260 (FGFR1)|2263 (FGFR2)|2735 (GLI1)|2736 (GLI2)|2737 (GLI3)|3082 (HGF)|3371 (TNC)|3373 (HYAL1)|3400 (ID4)|3606 (IL18)|3673 (ITGA2)|3679 (ITGA7)|3908 (LAMA2)|4211 (MEIS1)|4323 (MMP14)|4488 (MSX2)|4853 (NOTCH2)|4854 (NOTCH3)|5013 (OTX…
	A	GO|GO.BP	GO:0050793	regulation of developmental process	1.96333e-11	2.23741e-06	84	183 (AGT)|558 (AXL)|627 (BDNF)|658 (BMPR1B)|960 (CD44)|1491 (CTH)|1545 (CYP1B1)|1956 (EGFR)|2013 (EMP2)|2049 (EPHB3)|2064 (ERBB2)|2239 (GPC4)|2246 (FGF1)|2260 (FGFR1)|2263 (FGFR2)|2353 (FOS)|2670 (GFAP)|2735 (GLI1)|2736 (GLI2)|2737 (GLI3)|3082 (HGF)|3373 (HYAL1)|3400 (ID4)|3606 (IL18)|3679 (ITGA7)|3908 (LAMA2)|4211 (MEIS1)|4323 (MMP14)|4488 (MSX2)|4853 (NOTCH2)|4854 (NOTCH3)|4921 (DDR2)|5080 (PAX…
	A	GO|GO.BP	GO:0010646	regulation of cell communication	4.15608e-11	4.73627e-06	102	2 (A2M)|136 (ADORA2B)|183 (AGT)|477 (ATP1A2)|558 (AXL)|627 (BDNF)|658 (BMPR1B)|960 (CD44)|1491 (CTH)|1545 (CYP1B1)|1607 (DGKB)|1956 (EGFR)|2013 (EMP2)|2049 (EPHB3)|2064 (ERBB2)|2239 (GPC4)|2246 (FGF1)|2260 (FGFR1)|2263 (FGFR2)|2670 (GFAP)|2697 (GJA1)|2735 (GLI1)|2736 (GLI2)|2737 (GLI3)|2746 (GLUD1)|2913 (GRM3)|2915 (GRM5)|3082 (HGF)|3547 (IGSF1)|3606 (IL18)|3673 (ITGA2)|3908 (LAMA2)|4052 (LTBP1)|…
	A	GO|GO.BP	GO:0023051	regulation of signaling	7.4543e-11	8.49492e-06	102	2 (A2M)|136 (ADORA2B)|183 (AGT)|477 (ATP1A2)|558 (AXL)|627 (BDNF)|658 (BMPR1B)|960 (CD44)|1491 (CTH)|1545 (CYP1B1)|1607 (DGKB)|1956 (EGFR)|2013 (EMP2)|2049 (EPHB3)|2064 (ERBB2)|2239 (GPC4)|2246 (FGF1)|2260 (FGFR1)|2263 (FGFR2)|2670 (GFAP)|2697 (GJA1)|2735 (GLI1)|2736 (GLI2)|2737 (GLI3)|2746 (GLUD1)|2913 (GRM3)|2915 (GRM5)|3082 (HGF)|3547 (IGSF1)|3606 (IL18)|3673 (ITGA2)|3908 (LAMA2)|4052 (LTBP1)|…
	A	GO|GO.CC	GO:0031012	extracellular matrix	1.55576e-10	1.77294e-05	30	2 (A2M)|249 (ALPL)|954 (ENTPD2)|1404 (HAPLN1)|1463 (NCAN)|2239 (GPC4)|2246 (FGF1)|2263 (FGFR2)|3371 (TNC)|3908 (LAMA2)|4052 (LTBP1)|4323 (MMP14)|5654 (HTRA1)|5764 (PTN)|5803 (PTPRZ1)|6422 (SFRP1)|7042 (TGFB2)|7057 (THBS1)|7060 (THBS4)|7078 (TIMP3)|8404 (SPARCL1)|9508 (ADAMTS3)|9865 (TRIL)|10082 (GPC6)|26018 (LRIG1)|51435 (SCARA3)|80144 (FRAS1)|143282 (FGFBP3)|151887 (CCDC80)|341640 (FREM2)
	A	GO|GO.BP	GO:2000026	regulation of multicellular organismal development	1.71476e-10	1.95414e-05	70	183 (AGT)|558 (AXL)|627 (BDNF)|658 (BMPR1B)|1491 (CTH)|1545 (CYP1B1)|1956 (EGFR)|2013 (EMP2)|2049 (EPHB3)|2064 (ERBB2)|2239 (GPC4)|2246 (FGF1)|2260 (FGFR1)|2263 (FGFR2)|2353 (FOS)|2670 (GFAP)|2735 (GLI1)|2736 (GLI2)|2737 (GLI3)|3082 (HGF)|3373 (HYAL1)|3400 (ID4)|3606 (IL18)|3908 (LAMA2)|4211 (MEIS1)|4323 (MMP14)|4488 (MSX2)|4853 (NOTCH2)|4854 (NOTCH3)|4921 (DDR2)|5080 (PAX6)|5364 (PLXNB1)|5454 (P…
	A	GO|GO.BP	GO:0030323	respiratory tube development	2.12087e-10	2.41694e-05	18	1956 (EGFR)|2246 (FGF1)|2260 (FGFR1)|2263 (FGFR2)|2735 (GLI1)|2736 (GLI2)|2737 (GLI3)|3371 (TNC)|4323 (MMP14)|5764 (PTN)|6662 (SOX9)|6720 (SREBF1)|7289 (TULP3)|9231 (DLG5)|9620 (CELSR1)|10253 (SPRY2)|23657 (SLC7A11)|27031 (NPHP3)
	A	GO|GO.BP	GO:0007417	central nervous system development	2.30619e-10	2.62814e-05	43	205 (AK4)|558 (AXL)|1404 (HAPLN1)|1463 (NCAN)|1821 (DRP2)|1956 (EGFR)|2049 (EPHB3)|2064 (ERBB2)|2173 (FABP7)|2260 (FGFR1)|2263 (FGFR2)|2560 (GABRB1)|2670 (GFAP)|2735 (GLI1)|2736 (GLI2)|2737 (GLI3)|2746 (GLUD1)|3400 (ID4)|4129 (MAOB)|4854 (NOTCH3)|5013 (OTX1)|5080 (PAX6)|5454 (POU3F2)|5764 (PTN)|5803 (PTPRZ1)|5992 (RFX4)|6422 (SFRP1)|6506 (SLC1A2)|6538 (SLC6A11)|6657 (SOX2)|6662 (SOX9)|7289 (TULP3…
	A	GO|GO.BP	GO:0048729	tissue morphogenesis	4.8515e-10	5.52877e-05	33	183 (AGT)|960 (CD44)|1956 (EGFR)|2239 (GPC4)|2246 (FGF1)|2260 (FGFR1)|2263 (FGFR2)|2736 (GLI2)|2737 (GLI3)|3082 (HGF)|3371 (TNC)|3400 (ID4)|3673 (ITGA2)|4323 (MMP14)|4488 (MSX2)|6422 (SFRP1)|6662 (SOX9)|7042 (TGFB2)|7289 (TULP3)|9231 (DLG5)|9620 (CELSR1)|10082 (GPC6)|10253 (SPRY2)|23493 (HEY2)|27031 (NPHP3)|51301 (GCNT4)|51435 (SCARA3)|55366 (LGR4)|80144 (FRAS1)|84133 (ZNRF3)|286204 (CRB2)|341640…
	A	GO|GO.BP	GO:0007166	cell surface receptor signaling pathway	4.88828e-10	5.57069e-05	88	136 (ADORA2B)|183 (AGT)|558 (AXL)|627 (BDNF)|658 (BMPR1B)|960 (CD44)|1363 (CPE)|1956 (EGFR)|2013 (EMP2)|2049 (EPHB3)|2064 (ERBB2)|2239 (GPC4)|2246 (FGF1)|2260 (FGFR1)|2263 (FGFR2)|2353 (FOS)|2735 (GLI1)|2736 (GLI2)|2737 (GLI3)|2913 (GRM3)|2915 (GRM5)|3082 (HGF)|3547 (IGSF1)|3601 (IL15RA)|3606 (IL18)|3673 (ITGA2)|3679 (ITGA7)|4052 (LTBP1)|4163 (MCC)|4323 (MMP14)|4488 (MSX2)|4853 (NOTCH2)|4854 (NOT…
	A	GO|GO.BP	GO:0022612	gland morphogenesis	5.30729e-10	6.04818e-05	15	1956 (EGFR)|2260 (FGFR1)|2263 (FGFR2)|2735 (GLI1)|2736 (GLI2)|2737 (GLI3)|3082 (HGF)|3371 (TNC)|3400 (ID4)|4488 (MSX2)|5080 (PAX6)|5764 (PTN)|6422 (SFRP1)|6662 (SOX9)|7042 (TGFB2)
	A	GO|GO.BP	GO:0019752	carboxylic acid metabolic process	6.03012e-10	6.87193e-05	43	225 (ABCD2)|230 (ALDOC)|960 (CD44)|1463 (NCAN)|1491 (CTH)|1545 (CYP1B1)|2053 (EPHX2)|2746 (GLUD1)|2747 (GLUD2)|2875 (GPT)|3082 (HGF)|3373 (HYAL1)|3699 (ITIH3)|5166 (PDK4)|5322 (PLA2G5)|5465 (PPARA)|6507 (SLC1A3)|6542 (SLC7A2)|6720 (SREBF1)|7263 (TST)|8660 (IRS2)|8974 (P4HA2)|10157 (AASS)|10840 (ALDH1L1)|23205 (ACSBG1)|23305 (ACSL6)|23657 (SLC7A11)|26027 (ACOT11)|51268 (PIPOX)|54677 (CROT)|54898 (…
	A	GO|GO.BP	GO:0007155	cell adhesion	8.26601e-10	9.41994e-05	53	482 (ATP1B2)|558 (AXL)|960 (CD44)|1404 (HAPLN1)|1463 (NCAN)|1545 (CYP1B1)|1956 (EGFR)|2013 (EMP2)|2049 (EPHB3)|2064 (ERBB2)|2239 (GPC4)|2736 (GLI2)|2737 (GLI3)|3371 (TNC)|3373 (HYAL1)|3606 (IL18)|3673 (ITGA2)|3679 (ITGA7)|3908 (LAMA2)|4323 (MMP14)|4659 (PPP1R12A)|4921 (DDR2)|5364 (PLXNB1)|5465 (PPARA)|5764 (PTN)|6422 (SFRP1)|6657 (SOX2)|6662 (SOX9)|7042 (TGFB2)|7057 (THBS1)|7060 (THBS4)|7162 (TPB…
	A	GO|GO.BP	GO:0009888	tissue development	9.00402e-10	0.00010261	66	183 (AGT)|230 (ALDOC)|249 (ALPL)|658 (BMPR1B)|960 (CD44)|1545 (CYP1B1)|1956 (EGFR)|2239 (GPC4)|2246 (FGF1)|2260 (FGFR1)|2263 (FGFR2)|2353 (FOS)|2735 (GLI1)|2736 (GLI2)|2737 (GLI3)|3082 (HGF)|3371 (TNC)|3373 (HYAL1)|3400 (ID4)|3673 (ITGA2)|3679 (ITGA7)|4211 (MEIS1)|4323 (MMP14)|4488 (MSX2)|4921 (DDR2)|5080 (PAX6)|5454 (POU3F2)|5465 (PPARA)|5764 (PTN)|5925 (RB1)|6422 (SFRP1)|6574 (SLC20A1)|6657 (SO…
	A	GO|GO.BP	GO:0022610	biological adhesion	1.0119e-09	0.000115316	53	482 (ATP1B2)|558 (AXL)|960 (CD44)|1404 (HAPLN1)|1463 (NCAN)|1545 (CYP1B1)|1956 (EGFR)|2013 (EMP2)|2049 (EPHB3)|2064 (ERBB2)|2239 (GPC4)|2736 (GLI2)|2737 (GLI3)|3371 (TNC)|3373 (HYAL1)|3606 (IL18)|3673 (ITGA2)|3679 (ITGA7)|3908 (LAMA2)|4323 (MMP14)|4659 (PPP1R12A)|4921 (DDR2)|5364 (PLXNB1)|5465 (PPARA)|5764 (PTN)|6422 (SFRP1)|6657 (SOX2)|6662 (SOX9)|7042 (TGFB2)|7057 (THBS1)|7060 (THBS4)|7162 (TPB…
	A	GO|GO.BP	GO:0030324	lung development	1.15026e-09	0.000131084	17	1956 (EGFR)|2246 (FGF1)|2260 (FGFR1)|2263 (FGFR2)|2735 (GLI1)|2736 (GLI2)|2737 (GLI3)|3371 (TNC)|4323 (MMP14)|5764 (PTN)|6662 (SOX9)|6720 (SREBF1)|9231 (DLG5)|9620 (CELSR1)|10253 (SPRY2)|23657 (SLC7A11)|27031 (NPHP3)
	A	GO|GO.BP	GO:0060541	respiratory system development	1.37964e-09	0.000157223	18	1956 (EGFR)|2246 (FGF1)|2260 (FGFR1)|2263 (FGFR2)|2735 (GLI1)|2736 (GLI2)|2737 (GLI3)|3371 (TNC)|4323 (MMP14)|5764 (PTN)|6662 (SOX9)|6720 (SREBF1)|7289 (TULP3)|9231 (DLG5)|9620 (CELSR1)|10253 (SPRY2)|23657 (SLC7A11)|27031 (NPHP3)
	A	GO|GO.BP	GO:0007267	cell-cell signaling	1.4682e-09	0.000167316	57	136 (ADORA2B)|183 (AGT)|477 (ATP1A2)|558 (AXL)|627 (BDNF)|1363 (CPE)|1607 (DGKB)|1837 (DTNA)|1956 (EGFR)|2239 (GPC4)|2260 (FGFR1)|2263 (FGFR2)|2560 (GABRB1)|2565 (GABRG1)|2670 (GFAP)|2697 (GJA1)|2735 (GLI1)|2736 (GLI2)|2737 (GLI3)|2746 (GLUD1)|2913 (GRM3)|2915 (GRM5)|3082 (HGF)|3371 (TNC)|3606 (IL18)|3781 (KCNN2)|3908 (LAMA2)|4163 (MCC)|4828 (NMB)|5173 (PDYN)|5764 (PTN)|6422 (SFRP1)|6506 (SLC1A2)…
	A	GO|GO.BP	GO:0002009	morphogenesis of an epithelium	1.84673e-09	0.000210454	28	183 (AGT)|960 (CD44)|1956 (EGFR)|2239 (GPC4)|2246 (FGF1)|2260 (FGFR1)|2263 (FGFR2)|2736 (GLI2)|2737 (GLI3)|3082 (HGF)|3371 (TNC)|3400 (ID4)|4323 (MMP14)|4488 (MSX2)|6422 (SFRP1)|6662 (SOX9)|7042 (TGFB2)|7289 (TULP3)|9231 (DLG5)|9620 (CELSR1)|10082 (GPC6)|10253 (SPRY2)|27031 (NPHP3)|55366 (LGR4)|80144 (FRAS1)|84133 (ZNRF3)|341640 (FREM2)|388585 (HES5)
	A	GO|GO.BP	GO:0022008	neurogenesis	2.047e-09	0.000233276	56	183 (AGT)|558 (AXL)|627 (BDNF)|658 (BMPR1B)|1956 (EGFR)|2049 (EPHB3)|2064 (ERBB2)|2173 (FABP7)|2260 (FGFR1)|2263 (FGFR2)|2560 (GABRB1)|2670 (GFAP)|2736 (GLI2)|2737 (GLI3)|3082 (HGF)|3371 (TNC)|3400 (ID4)|3908 (LAMA2)|4211 (MEIS1)|4323 (MMP14)|4854 (NOTCH3)|5080 (PAX6)|5364 (PLXNB1)|5454 (POU3F2)|5764 (PTN)|5803 (PTPRZ1)|5925 (RB1)|6096 (RORB)|6422 (SFRP1)|6507 (SLC1A3)|6657 (SOX2)|6662 (SOX9)|704…
	A	GO|GO.BP	GO:0032501	multicellular organismal process	2.60168e-09	0.000296487	167	2 (A2M)|136 (ADORA2B)|183 (AGT)|205 (AK4)|225 (ABCD2)|249 (ALPL)|361 (AQP4)|366 (AQP9)|477 (ATP1A2)|482 (ATP1B2)|558 (AXL)|627 (BDNF)|658 (BMPR1B)|954 (ENTPD2)|960 (CD44)|1264 (CNN1)|1363 (CPE)|1404 (HAPLN1)|1463 (NCAN)|1491 (CTH)|1545 (CYP1B1)|1607 (DGKB)|1734 (DIO2)|1821 (DRP2)|1837 (DTNA)|1956 (EGFR)|2013 (EMP2)|2049 (EPHB3)|2053 (EPHX2)|2064 (ERBB2)|2173 (FABP7)|2239 (GPC4)|2246 (FGF1)|2260 (…
	A	GO|GO.BP	GO:0043436	oxoacid metabolic process	2.68679e-09	0.000306187	44	225 (ABCD2)|230 (ALDOC)|960 (CD44)|1463 (NCAN)|1491 (CTH)|1545 (CYP1B1)|2053 (EPHX2)|2746 (GLUD1)|2747 (GLUD2)|2875 (GPT)|3082 (HGF)|3373 (HYAL1)|3699 (ITIH3)|5166 (PDK4)|5322 (PLA2G5)|5465 (PPARA)|6507 (SLC1A3)|6542 (SLC7A2)|6720 (SREBF1)|7263 (TST)|8660 (IRS2)|8974 (P4HA2)|9060 (PAPSS2)|10157 (AASS)|10840 (ALDH1L1)|23205 (ACSBG1)|23305 (ACSL6)|23657 (SLC7A11)|26027 (ACOT11)|51268 (PIPOX)|54677 …
	A	GO|GO.BP	GO:0045595	regulation of cell differentiation	2.72179e-09	0.000310175	61	183 (AGT)|558 (AXL)|627 (BDNF)|658 (BMPR1B)|1491 (CTH)|1956 (EGFR)|2013 (EMP2)|2049 (EPHB3)|2064 (ERBB2)|2260 (FGFR1)|2263 (FGFR2)|2353 (FOS)|2670 (GFAP)|2735 (GLI1)|2736 (GLI2)|2737 (GLI3)|3082 (HGF)|3400 (ID4)|3606 (IL18)|4211 (MEIS1)|4323 (MMP14)|4488 (MSX2)|4853 (NOTCH2)|4854 (NOTCH3)|4921 (DDR2)|5080 (PAX6)|5364 (PLXNB1)|5454 (POU3F2)|5465 (PPARA)|5764 (PTN)|5803 (PTPRZ1)|5925 (RB1)|6096 (RO…
	A	GO|GO.BP	GO:0009966	regulation of signal transduction	2.94205e-09	0.000335276	90	2 (A2M)|136 (ADORA2B)|183 (AGT)|558 (AXL)|627 (BDNF)|658 (BMPR1B)|960 (CD44)|1491 (CTH)|1545 (CYP1B1)|1956 (EGFR)|2013 (EMP2)|2049 (EPHB3)|2064 (ERBB2)|2239 (GPC4)|2246 (FGF1)|2260 (FGFR1)|2263 (FGFR2)|2697 (GJA1)|2735 (GLI1)|2736 (GLI2)|2737 (GLI3)|3082 (HGF)|3547 (IGSF1)|3606 (IL18)|4052 (LTBP1)|4163 (MCC)|4323 (MMP14)|4488 (MSX2)|4828 (NMB)|4853 (NOTCH2)|4854 (NOTCH3)|4921 (DDR2)|5173 (PDYN)|5…
	A	GO|GO.BP	GO:0007154	cell communication	4.00477e-09	0.000456383	150	2 (A2M)|136 (ADORA2B)|183 (AGT)|477 (ATP1A2)|482 (ATP1B2)|558 (AXL)|627 (BDNF)|658 (BMPR1B)|954 (ENTPD2)|960 (CD44)|1363 (CPE)|1491 (CTH)|1545 (CYP1B1)|1607 (DGKB)|1837 (DTNA)|1956 (EGFR)|2013 (EMP2)|2049 (EPHB3)|2064 (ERBB2)|2239 (GPC4)|2246 (FGF1)|2260 (FGFR1)|2263 (FGFR2)|2353 (FOS)|2560 (GABRB1)|2565 (GABRG1)|2670 (GFAP)|2697 (GJA1)|2735 (GLI1)|2736 (GLI2)|2737 (GLI3)|2746 (GLUD1)|2913 (GRM3)…
	A	GO|GO.BP	GO:0043062	extracellular structure organization	4.10281e-09	0.000467556	25	2 (A2M)|183 (AGT)|960 (CD44)|1404 (HAPLN1)|1463 (NCAN)|1545 (CYP1B1)|2670 (GFAP)|3371 (TNC)|3373 (HYAL1)|3673 (ITGA2)|3679 (ITGA7)|3908 (LAMA2)|3931 (LCAT)|4323 (MMP14)|4921 (DDR2)|5322 (PLA2G5)|5654 (HTRA1)|5925 (RB1)|6662 (SOX9)|7042 (TGFB2)|7057 (THBS1)|7412 (VCAM1)|9388 (LIPG)|9508 (ADAMTS3)|151887 (CCDC80)
	A	GO|GO.BP	GO:0006082	organic acid metabolic process	4.33305e-09	0.000493794	44	225 (ABCD2)|230 (ALDOC)|960 (CD44)|1463 (NCAN)|1491 (CTH)|1545 (CYP1B1)|2053 (EPHX2)|2746 (GLUD1)|2747 (GLUD2)|2875 (GPT)|3082 (HGF)|3373 (HYAL1)|3699 (ITIH3)|5166 (PDK4)|5322 (PLA2G5)|5465 (PPARA)|6507 (SLC1A3)|6542 (SLC7A2)|6720 (SREBF1)|7263 (TST)|8660 (IRS2)|8974 (P4HA2)|9060 (PAPSS2)|10157 (AASS)|10840 (ALDH1L1)|23205 (ACSBG1)|23305 (ACSL6)|23657 (SLC7A11)|26027 (ACOT11)|51268 (PIPOX)|54677 …
	A	GO|GO.CC	GO:0042995	cell projection	4.38483e-09	0.000499695	68	477 (ATP1A2)|627 (BDNF)|658 (BMPR1B)|720 (C4A)|721 (C4B)|960 (CD44)|1821 (DRP2)|1837 (DTNA)|2049 (EPHB3)|2173 (FABP7)|2353 (FOS)|2560 (GABRB1)|2565 (GABRG1)|2670 (GFAP)|2735 (GLI1)|2736 (GLI2)|2737 (GLI3)|2913 (GRM3)|2915 (GRM5)|3673 (ITGA2)|3781 (KCNN2)|3782 (KCNN3)|3908 (LAMA2)|4163 (MCC)|4828 (NMB)|5173 (PDYN)|5783 (PTPN13)|6506 (SLC1A2)|6507 (SLC1A3)|6509 (SLC1A4)|6538 (SLC6A11)|7042 (TGFB2)|…
	A	GO|GO.BP	GO:0006796	phosphate-containing compound metabolic process	4.42548e-09	0.000504328	90	136 (ADORA2B)|183 (AGT)|205 (AK4)|230 (ALDOC)|249 (ALPL)|477 (ATP1A2)|558 (AXL)|627 (BDNF)|658 (BMPR1B)|894 (CCND2)|954 (ENTPD2)|960 (CD44)|1607 (DGKB)|1956 (EGFR)|2013 (EMP2)|2049 (EPHB3)|2053 (EPHX2)|2064 (ERBB2)|2246 (FGF1)|2260 (FGFR1)|2263 (FGFR2)|2915 (GRM5)|3082 (HGF)|3606 (IL18)|3673 (ITGA2)|3931 (LCAT)|4659 (PPP1R12A)|4853 (NOTCH2)|4921 (DDR2)|5080 (PAX6)|5166 (PDK4)|5260 (PHKG1)|5322 (P…
	A	GO|GO.BP	GO:0001655	urogenital system development	6.62616e-09	0.000755118	22	183 (AGT)|2049 (EPHB3)|2246 (FGF1)|2260 (FGFR1)|2263 (FGFR2)|2735 (GLI1)|2736 (GLI2)|2737 (GLI3)|3371 (TNC)|3400 (ID4)|4854 (NOTCH3)|6422 (SFRP1)|6662 (SOX9)|7042 (TGFB2)|9231 (DLG5)|27031 (NPHP3)|28999 (KLF15)|51301 (GCNT4)|55366 (LGR4)|80144 (FRAS1)|120892 (LRRK2)|388585 (HES5)
	A	GO|GO.BP	GO:0032502	developmental process	6.67138e-09	0.00076027	144	2 (A2M)|183 (AGT)|205 (AK4)|225 (ABCD2)|230 (ALDOC)|249 (ALPL)|558 (AXL)|627 (BDNF)|658 (BMPR1B)|960 (CD44)|1363 (CPE)|1404 (HAPLN1)|1463 (NCAN)|1491 (CTH)|1545 (CYP1B1)|1821 (DRP2)|1956 (EGFR)|2013 (EMP2)|2049 (EPHB3)|2064 (ERBB2)|2173 (FABP7)|2239 (GPC4)|2246 (FGF1)|2260 (FGFR1)|2263 (FGFR2)|2353 (FOS)|2560 (GABRB1)|2670 (GFAP)|2697 (GJA1)|2735 (GLI1)|2736 (GLI2)|2737 (GLI3)|2746 (GLUD1)|2915 (…
	A	GO|GO.BP	GO:0006793	phosphorus metabolic process	6.71577e-09	0.000765329	90	136 (ADORA2B)|183 (AGT)|205 (AK4)|230 (ALDOC)|249 (ALPL)|477 (ATP1A2)|558 (AXL)|627 (BDNF)|658 (BMPR1B)|894 (CCND2)|954 (ENTPD2)|960 (CD44)|1607 (DGKB)|1956 (EGFR)|2013 (EMP2)|2049 (EPHB3)|2053 (EPHX2)|2064 (ERBB2)|2246 (FGF1)|2260 (FGFR1)|2263 (FGFR2)|2915 (GRM5)|3082 (HGF)|3606 (IL18)|3673 (ITGA2)|3931 (LCAT)|4659 (PPP1R12A)|4853 (NOTCH2)|4921 (DDR2)|5080 (PAX6)|5166 (PDK4)|5260 (PHKG1)|5322 (P…
	A	GO|GO.BP	GO:0048856	anatomical structure development	7.16216e-09	0.0008162	137	183 (AGT)|205 (AK4)|225 (ABCD2)|230 (ALDOC)|249 (ALPL)|558 (AXL)|627 (BDNF)|658 (BMPR1B)|960 (CD44)|1363 (CPE)|1404 (HAPLN1)|1463 (NCAN)|1491 (CTH)|1545 (CYP1B1)|1821 (DRP2)|1956 (EGFR)|2013 (EMP2)|2049 (EPHB3)|2064 (ERBB2)|2173 (FABP7)|2239 (GPC4)|2246 (FGF1)|2260 (FGFR1)|2263 (FGFR2)|2353 (FOS)|2560 (GABRB1)|2670 (GFAP)|2697 (GJA1)|2735 (GLI1)|2736 (GLI2)|2737 (GLI3)|2746 (GLUD1)|3082 (HGF)|337…
	A	GO|GO.BP	GO:0060322	head development	8.37376e-09	0.000954274	35	205 (AK4)|558 (AXL)|1956 (EGFR)|2049 (EPHB3)|2173 (FABP7)|2260 (FGFR1)|2263 (FGFR2)|2735 (GLI1)|2736 (GLI2)|2737 (GLI3)|2746 (GLUD1)|3400 (ID4)|4129 (MAOB)|4323 (MMP14)|4854 (NOTCH3)|5013 (OTX1)|5080 (PAX6)|5454 (POU3F2)|5764 (PTN)|5992 (RFX4)|6422 (SFRP1)|6506 (SLC1A2)|6538 (SLC6A11)|6657 (SOX2)|6662 (SOX9)|7289 (TULP3)|8660 (IRS2)|9201 (DCLK1)|9231 (DLG5)|23657 (SLC7A11)|25987 (TSKU)|57447 (NDR…
	A	GO|GO.BP	GO:0010648	negative regulation of cell communication	9.57713e-09	0.00109141	50	183 (AGT)|558 (AXL)|960 (CD44)|1491 (CTH)|1956 (EGFR)|2049 (EPHB3)|2064 (ERBB2)|2260 (FGFR1)|2263 (FGFR2)|2735 (GLI1)|2737 (GLI3)|3082 (HGF)|3547 (IGSF1)|4052 (LTBP1)|4163 (MCC)|4323 (MMP14)|4828 (NMB)|4854 (NOTCH3)|4921 (DDR2)|5654 (HTRA1)|5922 (RASA2)|5925 (RB1)|5992 (RFX4)|6000 (RGS7)|6422 (SFRP1)|6657 (SOX2)|6662 (SOX9)|6720 (SREBF1)|7042 (TGFB2)|7057 (THBS1)|7078 (TIMP3)|7289 (TULP3)|7430 (E…
	A	GO|GO.BP	GO:0023057	negative regulation of signaling	1.05311e-08	0.00120012	50	183 (AGT)|558 (AXL)|960 (CD44)|1491 (CTH)|1956 (EGFR)|2049 (EPHB3)|2064 (ERBB2)|2260 (FGFR1)|2263 (FGFR2)|2735 (GLI1)|2737 (GLI3)|3082 (HGF)|3547 (IGSF1)|4052 (LTBP1)|4163 (MCC)|4323 (MMP14)|4828 (NMB)|4854 (NOTCH3)|4921 (DDR2)|5654 (HTRA1)|5922 (RASA2)|5925 (RB1)|5992 (RFX4)|6000 (RGS7)|6422 (SFRP1)|6657 (SOX2)|6662 (SOX9)|6720 (SREBF1)|7042 (TGFB2)|7057 (THBS1)|7078 (TIMP3)|7289 (TULP3)|7430 (E…
	A	GO|GO.BP	GO:0030030	cell projection organization	1.06878e-08	0.00121798	53	183 (AGT)|225 (ABCD2)|627 (BDNF)|658 (BMPR1B)|960 (CD44)|1956 (EGFR)|2013 (EMP2)|2049 (EPHB3)|2064 (ERBB2)|2260 (FGFR1)|2263 (FGFR2)|2670 (GFAP)|2736 (GLI2)|2737 (GLI3)|3082 (HGF)|3371 (TNC)|3673 (ITGA2)|3908 (LAMA2)|5080 (PAX6)|5364 (PLXNB1)|5454 (POU3F2)|5764 (PTN)|5803 (PTPRZ1)|5925 (RB1)|5992 (RFX4)|6422 (SFRP1)|7430 (EZR)|7802 (DNALI1)|8660 (IRS2)|8997 (KALRN)|9201 (DCLK1)|9231 (DLG5)|10253 …
	A	GO|GO.BP	GO:0007275	multicellular organism development	1.10455e-08	0.00125875	128	183 (AGT)|205 (AK4)|225 (ABCD2)|249 (ALPL)|558 (AXL)|627 (BDNF)|658 (BMPR1B)|960 (CD44)|1363 (CPE)|1404 (HAPLN1)|1463 (NCAN)|1491 (CTH)|1545 (CYP1B1)|1821 (DRP2)|1956 (EGFR)|2013 (EMP2)|2049 (EPHB3)|2064 (ERBB2)|2173 (FABP7)|2239 (GPC4)|2246 (FGF1)|2260 (FGFR1)|2263 (FGFR2)|2353 (FOS)|2560 (GABRB1)|2670 (GFAP)|2697 (GJA1)|2735 (GLI1)|2736 (GLI2)|2737 (GLI3)|2746 (GLUD1)|3082 (HGF)|3371 (TNC)|3373…
	A	GO|GO.BP	GO:0001763	morphogenesis of a branching structure	1.10524e-08	0.00125953	17	183 (AGT)|2246 (FGF1)|2260 (FGFR1)|2263 (FGFR2)|2736 (GLI2)|2737 (GLI3)|3082 (HGF)|3371 (TNC)|4323 (MMP14)|4488 (MSX2)|6422 (SFRP1)|6662 (SOX9)|9231 (DLG5)|9620 (CELSR1)|10253 (SPRY2)|55366 (LGR4)|120892 (LRRK2)
	A	GO|GO.BP	GO:0051960	regulation of nervous system development	1.18249e-08	0.00134757	38	183 (AGT)|627 (BDNF)|2049 (EPHB3)|2239 (GPC4)|2260 (FGFR1)|2670 (GFAP)|2735 (GLI1)|2736 (GLI2)|2737 (GLI3)|3082 (HGF)|3400 (ID4)|4211 (MEIS1)|4854 (NOTCH3)|5080 (PAX6)|5364 (PLXNB1)|5454 (POU3F2)|5764 (PTN)|5803 (PTPRZ1)|5992 (RFX4)|6422 (SFRP1)|6657 (SOX2)|6662 (SOX9)|7162 (TPBG)|7289 (TULP3)|8997 (KALRN)|9231 (DLG5)|9620 (CELSR1)|23493 (HEY2)|23499 (MACF1)|23500 (DAAM2)|25791 (NGEF)|27031 (NPHP…
	A	GO|GO.BP	GO:0048699	generation of neurons	1.20937e-08	0.0013782	52	183 (AGT)|558 (AXL)|627 (BDNF)|658 (BMPR1B)|1956 (EGFR)|2049 (EPHB3)|2064 (ERBB2)|2260 (FGFR1)|2263 (FGFR2)|2560 (GABRB1)|2670 (GFAP)|2736 (GLI2)|2737 (GLI3)|3082 (HGF)|3371 (TNC)|3400 (ID4)|3908 (LAMA2)|4211 (MEIS1)|4854 (NOTCH3)|5080 (PAX6)|5364 (PLXNB1)|5454 (POU3F2)|5764 (PTN)|5803 (PTPRZ1)|5925 (RB1)|6096 (RORB)|6422 (SFRP1)|6507 (SLC1A3)|6657 (SOX2)|6662 (SOX9)|7042 (TGFB2)|7289 (TULP3)|741…
	A	GO|GO.BP	GO:0007224	smoothened signaling pathway	1.2943e-08	0.00147499	14	2263 (FGFR2)|2735 (GLI1)|2736 (GLI2)|2737 (GLI3)|5080 (PAX6)|5925 (RB1)|5992 (RFX4)|6422 (SFRP1)|7289 (TULP3)|9231 (DLG5)|91653 (BOC)|132884 (EVC2)|154865 (IQUB)|388585 (HES5)
[truncated: 85 more rows]

## Sheet: S3B Table  - Upregulated
	Cell	GO_Group	DataSetID	DataSetName	p	Bonferroni	#Genes	Genes
[truncated: 697 more rows]

## Sheet: S3C Table - Downregulated
	Cell	GO_Group	DataSetID	DataSetName	p	Bonferroni	#Genes	Genes
[truncated: 288 more rows]
