# Supplementary material for: ESHRD: deconvolution of brain homogenate RNA expression data to identify cell-type-specific alterations in Alzheimer’s disease
Source: Aging (Albany NY). 2020 Mar 2;12(5):4124–62. doi: 10.18632/aging.102840 (PMC7093163; doi:10.18632/aging.102840)
Supplement: Supplementary Table 4 [file aging-12-102840-s004..xlsx]

## Sheet: S4A Table - All Genes
	Cell	Pathway_ID	Name	p	Bonferroni	#Genes	Genes
	N	R-HSA-112316	Neuronal System	1.57059e-19	9.34501e-17	45	ABCC8/CACNG3/CACNA2D2/SYN1/NRXN3/SYT1/SLC32A1/GLRA2/GRIN2D/RAB3A/RASGRF2/GABRG2/KCNJ5/GAD1/SNAP25/GAD2/STXBP1/HCN4/CACNA1A/KCNH1/PPFIA4/GRIP2/GLRA3/CACNA1B/HTR3B/CACNA2D1/KCNS2/CACNA2D3/GJD2/CHRNB2/SHANK2/HCN1/ADCY1/KCNC2/CACNG2/CPLX1/KCNK9/KCNG3/BEGAIN/GRIN2A/KCNH7/SYN3/KCNQ5/IL1RAPL2/GRIN2B
	N	R-HSA-112315	Transmission across Chemical Synapses	3.58069e-14	2.13051e-11	30	CACNG3/CACNA2D2/SYN1/SYT1/SLC32A1/GLRA2/GRIN2D/RAB3A/RASGRF2/GABRG2/KCNJ5/GAD1/SNAP25/GAD2/STXBP1/CACNA1A/PPFIA4/GRIP2/GLRA3/CACNA1B/HTR3B/CACNA2D1/CACNA2D3/CHRNB2/ADCY1/CACNG2/CPLX1/GRIN2A/SYN3/GRIN2B
	N	R-HSA-181429	Serotonin Neurotransmitter Release Cycle	4.30799e-09	2.56325e-06	8	SYN1/SYT1/RAB3A/SNAP25/STXBP1/PPFIA4/CPLX1/SYN3
	N	R-HSA-888590	GABA synthesis, release, reuptake and degradation	7.28332e-09	4.33358e-06	8	SYT1/SLC32A1/RAB3A/GAD1/SNAP25/GAD2/STXBP1/CPLX1
	N	R-HSA-112310	Neurotransmitter release cycle	3.26911e-08	1.94512e-05	11	SYN1/SYT1/SLC32A1/RAB3A/GAD1/SNAP25/GAD2/STXBP1/PPFIA4/CPLX1/SYN3
	N	R-HSA-212676	Dopamine Neurotransmitter Release Cycle	4.33691e-08	2.58046e-05	8	SYN1/SYT1/RAB3A/SNAP25/STXBP1/PPFIA4/CPLX1/SYN3
	N	R-HSA-112308	Presynaptic depolarization and calcium channel opening	3.13258e-07	0.000186389	6	CACNA2D2/CACNA1A/CACNA1B/CACNA2D1/CACNA2D3/CACNG2
	N	R-HSA-264642	Acetylcholine Neurotransmitter Release Cycle	2.07897e-06	0.00123699	6	SYT1/RAB3A/SNAP25/STXBP1/PPFIA4/CPLX1
	N	R-HSA-500792	GPCR ligand binding	2.66051e-06	0.001583	29	GIPR/OPN3/OPRK1/NTSR1/CRHR2/OPRM1/TACR1/CNR1/PRLHR/CHRM3/ADCYAP1/PTH2R/CRHBP/VIP/GNRH1/CRH/DRD2/SST/GRM2/NPY1R/GALR1/TAC3/DRD5/RXFP1/HTR1A/SSTR2/PENK/NPY2R/CCK
	N	R-HSA-181430	Norepinephrine Neurotransmitter Release Cycle	3.05435e-06	0.00181734	6	SYT1/RAB3A/SNAP25/STXBP1/PPFIA4/CPLX1
	N	R-HSA-8986944	Transcriptional Regulation by MECP2	6.86861e-06	0.00408682	9	OPRK1/MET/OPRM1/GAD1/GAD2/CRH/SST/GRIN2A/GRIN2B
	N	R-HSA-5576891	Cardiac conduction	9.48102e-06	0.0056412	14	CACNG3/CACNA2D2/NOS1/ATP1A3/FKBP1B/CACNA2D1/CACNA2D3/NPPC/SCN3B/CACNG2/KCNK9/SCN5A/KCNIP4/FXYD7
	N	R-HSA-210500	Glutamate Neurotransmitter Release Cycle	1.95536e-05	0.0116344	6	SYT1/RAB3A/SNAP25/STXBP1/PPFIA4/CPLX1
	N	R-HSA-9022699	MECP2 regulates neuronal receptors and channels	2.14178e-05	0.0127436	5	OPRK1/MET/OPRM1/GRIN2A/GRIN2B
	N	R-HSA-112314	Neurotransmitter receptors and postsynaptic signal transmission	3.00188e-05	0.0178612	14	CACNG3/GLRA2/GRIN2D/RASGRF2/GABRG2/KCNJ5/GRIP2/GLRA3/HTR3B/CHRNB2/ADCY1/CACNG2/GRIN2A/GRIN2B
	N	R-HSA-1296071	Potassium Channels	3.04347e-05	0.0181087	11	ABCC8/KCNJ5/HCN4/KCNH1/KCNS2/HCN1/KCNC2/KCNK9/KCNG3/KCNH7/KCNQ5
	N	R-HSA-3928665	EPH-ephrin mediated repulsion of cells	3.0984e-05	0.0184355	8	EPHA3/EPHA8/EPHA6/DNM1/EPHB2/EFNA3/EPHA10/EFNA5
	N	R-HSA-397014	Muscle contraction	4.8895e-05	0.0290925	16	CACNG3/CACNA2D2/NOS1/ATP1A3/FKBP1B/ACTA1/CACNA2D1/CACNA2D3/NPPC/SCN3B/CACNG2/KCNK9/SCN5A/KCNIP4/MYL6B/FXYD7
	N	R-HSA-373076	Class A/1 (Rhodopsin-like receptors)	5.01484e-05	0.0298383	21	OPN3/OPRK1/NTSR1/OPRM1/TACR1/CNR1/PRLHR/CHRM3/GNRH1/DRD2/SST/NPY1R/GALR1/TAC3/DRD5/RXFP1/HTR1A/SSTR2/PENK/NPY2R/CCK
	N	R-HSA-6794362	Protein-protein interactions at synapses	5.22349e-05	0.0310798	10	NRXN3/SYT1/GRIN2D/STXBP1/PPFIA4/SHANK2/BEGAIN/GRIN2A/IL1RAPL2/GRIN2B
	N	R-HSA-6794361	Neurexins and neuroligins	6.21478e-05	0.0369779	8	NRXN3/SYT1/GRIN2D/STXBP1/SHANK2/BEGAIN/GRIN2A/GRIN2B
	N	R-HSA-168799	Neurotoxicity of clostridium toxins	6.72418e-05	0.0400089	4	SYT1/SV2C/SNAP25/SV2B
	N	R-HSA-3928663	EPHA-mediated growth cone collapse	7.61889e-05	0.0453324	6	EPHA3/EPHA8/EPHA6/EFNA3/EPHA10/EFNA5
	M	R-HSA-6798695	Neutrophil degranulation	1.75963e-23	1.45169e-20	65	FGR/MPO/ITGAL/TYROBP/LTF/RNASET2/TNFRSF1B/GRN/CYBA/STK10/PTPRC/B4GALT1/CMTM6/UNC13D/SYNGR1/CTSZ/CST3/COTL1/GSDMD/TSPAN14/TCIRG1/QSOX1/CTSD/VAMP8/HVCN1/C3/CFP/SLC44A2/GMFG/LGALS3/DOCK2/GNS/TLR2/GLIPR1/ITGAX/GALNS/TRPM2/CD53/FCGR2A/S100A8/DOK3/FCER1G/ITGB2/NBEAL2/HK3/FCGR3B/CTSS/S100A9/PRKCD/CYBB/PTAFR/AGPAT2/ITGAM/CD14/FPR1/C3AR1/HPSE/METTL7A/NHLRC3/C5AR1/PNP/NEU1/HSPA1A/NFAM1/PLEKHO2
	M	R-HSA-449147	Signaling by Interleukins	7.42933e-13	6.1292e-10	48	CD4/TNFRSF1B/MAP2K3/TNFRSF1A/PTPN18/NFKB2/IL4R/ICAM1/HMOX1/CSF2RB/NFKBIB/EBI3/TGFB1/CCL2/IL10RA/CD86/MAPKAPK3/IL1RL2/RPS6KA1/CSF3R/PTK2B/F13A1/HAVCR2/LCP1/CASP1/ITGAX/VAV1/ITGB2/IL6R/MAPKAPK2/CCR1/STAT6/TNIP2/INPP5D/PTAFR/ITGAM/FPR1/JUNB/BCL2L1/PIK3CD/IL16/MYD88/RELA/CSF1R/CSF1/SOCS3/PSMB8/LYN
	M	R-HSA-168898	Toll-like Receptor Cascades	5.13856e-12	4.23931e-09	26	BTK/MAP2K3/NFKB2/LGMN/NFKBIB/UNC93B1/MAPKAPK3/RPS6KA1/TICAM1/CNPY3/TLR2/S100A8/ITGB2/MAPKAPK2/CTSS/S100A9/TNIP2/ITGAM/CD14/MYD88/RELA/TLR1/TLR6/TLR5/TLR7/PLCG2
	M	R-HSA-5260271	Diseases of Immune System	6.84351e-11	5.6459e-08	11	BTK/NFKB2/UNC93B1/TICAM1/TLR2/CD14/MYD88/RELA/TLR1/TLR6/TLR5
	M	R-HSA-5602358	Diseases associated with the TLR signaling cascade	6.84351e-11	5.6459e-08	11	BTK/NFKB2/UNC93B1/TICAM1/TLR2/CD14/MYD88/RELA/TLR1/TLR6/TLR5
	M	R-HSA-1236975	Antigen processing-Cross presentation	1.19855e-07	9.88801e-05	16	BTK/CYBA/ITGB5/NCF4/NCF2/VAMP8/TLR2/CTSS/CYBB/CD14/MYD88/TLR1/TLR6/PSMB8/TAPBP/MRC1
	M	R-HSA-166016	Toll Like Receptor 4 (TLR4) Cascade	2.21801e-07	0.000182986	18	BTK/MAP2K3/NFKB2/NFKBIB/MAPKAPK3/RPS6KA1/TICAM1/TLR2/ITGB2/MAPKAPK2/TNIP2/ITGAM/CD14/MYD88/RELA/TLR1/TLR6/PLCG2
	M	R-HSA-5602498	MyD88 deficiency (TLR2/4)	2.23475e-07	0.000184367	6	BTK/TLR2/CD14/MYD88/TLR1/TLR6
	M	R-HSA-76002	Platelet activation, signaling and aggregation	4.52426e-07	0.000373251	26	LCP2/GNA15/DGKD/APBB1IP/ABHD12/CSK/TGFB1/PIK3CG/SERPINE1/LGALS3BP/PLEK/QSOX1/F13A1/RAC2/TLN1/ARRB2/PIK3R5/VAV1/RHOB/FERMT3/FCER1G/PRKCD/DAGLB/PTPN1/PLCG2/LYN
	M	R-HSA-5603041	IRAK4 deficiency (TLR2/4)	4.78089e-07	0.000394423	6	BTK/TLR2/CD14/MYD88/TLR1/TLR6
	M	R-HSA-114604	GPVI-mediated activation cascade	1.3095e-06	0.00108034	9	LCP2/PIK3CG/RAC2/PIK3R5/VAV1/RHOB/FCER1G/PLCG2/LYN
	M	R-HSA-6785807	Interleukin-4 and Interleukin-13 signaling	2.20429e-06	0.00181854	15	TNFRSF1B/IL4R/ICAM1/HMOX1/TGFB1/CCL2/F13A1/ITGAX/ITGB2/IL6R/STAT6/ITGAM/JUNB/BCL2L1/SOCS3
	M	R-HSA-6783783	Interleukin-10 signaling	2.21174e-06	0.00182469	10	TNFRSF1B/TNFRSF1A/ICAM1/CCL2/IL10RA/CD86/CCR1/PTAFR/FPR1/CSF1
	M	R-HSA-166058	MyD88:MAL(TIRAP) cascade initiated on plasma membrane	2.3475e-06	0.00193669	14	BTK/MAP2K3/NFKB2/NFKBIB/MAPKAPK3/RPS6KA1/TLR2/MAPKAPK2/TNIP2/CD14/MYD88/RELA/TLR1/TLR6
	M	R-HSA-168188	Toll Like Receptor TLR6:TLR2 Cascade	2.3475e-06	0.00193669	14	BTK/MAP2K3/NFKB2/NFKBIB/MAPKAPK3/RPS6KA1/TLR2/MAPKAPK2/TNIP2/CD14/MYD88/RELA/TLR1/TLR6
	M	R-HSA-168179	Toll Like Receptor TLR1:TLR2 Cascade	3.42808e-06	0.00282816	14	BTK/MAP2K3/NFKB2/NFKBIB/MAPKAPK3/RPS6KA1/TLR2/MAPKAPK2/TNIP2/CD14/MYD88/RELA/TLR1/TLR6
	M	R-HSA-181438	Toll Like Receptor 2 (TLR2) Cascade	3.42808e-06	0.00282816	14	BTK/MAP2K3/NFKB2/NFKBIB/MAPKAPK3/RPS6KA1/TLR2/MAPKAPK2/TNIP2/CD14/MYD88/RELA/TLR1/TLR6
	M	R-HSA-4420097	VEGFA-VEGFR2 Pathway	1.95513e-05	0.0161298	13	CYBA/ACTB/PXN/NCF4/MAPKAPK3/NCF2/PTK2B/VAV1/WASF2/MAPKAPK2/PRKCD/CYBB/SPHK1
	M	R-HSA-5686938	Regulation of TLR by endogenous ligand	2.24618e-05	0.018531	6	TLR2/S100A8/S100A9/CD14/TLR1/TLR6
	M	R-HSA-622312	Inflammasomes	3.12078e-05	0.0257464	6	NFKB2/CASP1/NLRP3/BCL2L1/RELA/TXNIP
	M	R-HSA-1679131	Trafficking and processing of endosomal TLR	3.81106e-05	0.0314412	5	LGMN/UNC93B1/CNPY3/CTSS/TLR7
	M	R-HSA-5668599	RHO GTPases Activate NADPH Oxidases	3.81106e-05	0.0314412	5	CYBA/NCF4/NCF2/RAC2/CYBB
	M	R-HSA-1606322	ZBP1(DAI) mediated induction of type I IFNs	4.24928e-05	0.0350566	6	NFKB2/NFKBIB/DTX4/TICAM1/MYD88/RELA
	M	R-HSA-194138	Signaling by VEGF	4.52112e-05	0.0372992	13	CYBA/ACTB/PXN/NCF4/MAPKAPK3/NCF2/PTK2B/VAV1/WASF2/MAPKAPK2/PRKCD/CYBB/SPHK1
	M	R-HSA-975138	TRAF6 mediated induction of NFkB and MAP kinases upon TLR7/8 or 9 activation	4.86616e-05	0.0401458	12	MAP2K3/NFKB2/NFKBIB/MAPKAPK3/RPS6KA1/TICAM1/MAPKAPK2/TNIP2/CD14/MYD88/RELA/TLR7
	M	R-HSA-168181	Toll Like Receptor 7/8 (TLR7/8) Cascade	5.41679e-05	0.0446885	12	MAP2K3/NFKB2/NFKBIB/MAPKAPK3/RPS6KA1/TICAM1/MAPKAPK2/TNIP2/CD14/MYD88/RELA/TLR7
	M	R-HSA-975155	MyD88 dependent cascade initiated on endosome	5.41679e-05	0.0446885	12	MAP2K3/NFKB2/NFKBIB/MAPKAPK3/RPS6KA1/TICAM1/MAPKAPK2/TNIP2/CD14/MYD88/RELA/TLR7
	EC	R-HSA-1474244	Extracellular matrix organization	2.83064e-11	2.01542e-08	33	MMP25/ACTN1/NID2/LAMB1/MADCAM1/TIMP1/ICAM2/VTN/VWF/LAMA4/FN1/NID1/KDR/LAMA5/LOXL2/ADAMTS8/LAMC1/ADAM10/FBLN5/HSPG2/SERPINH1/ITGB1/CAST/ADAMTS9/COL4A3/CRTAP/BSG/CD151/BGN/COL4A1/ITGA1/COL28A1/PECAM1
	EC	R-HSA-3000157	Laminin interactions	3.0633e-10	2.18107e-07	11	NID2/LAMB1/LAMA4/NID1/LAMA5/LAMC1/HSPG2/ITGB1/COL4A3/COL4A1/ITGA1
	EC	R-HSA-3000171	Non-integrin membrane-ECM interactions	7.46482e-07	0.000531495	11	ACTN1/LAMB1/VTN/LAMA4/FN1/LAMA5/LAMC1/HSPG2/ITGB1/COL4A3/COL4A1
	EC	R-HSA-216083	Integrin cell surface interactions	8.03856e-07	0.000572345	13	MADCAM1/ICAM2/VTN/VWF/FN1/KDR/HSPG2/ITGB1/COL4A3/BSG/COL4A1/ITGA1/PECAM1
	EC	R-HSA-114608	Platelet degranulation	4.1081e-06	0.00292497	15	ACTN1/TIMP1/SYTL4/VWF/FN1/SRGN/ABCC4/ACTN4/MMRN1/ECM1/VEGFC/CD109/ANXA5/SERPINA1/PECAM1
	EC	R-HSA-76005	Response to elevated platelet cytosolic Ca2+	6.59923e-06	0.00469865	15	ACTN1/TIMP1/SYTL4/VWF/FN1/SRGN/ABCC4/ACTN4/MMRN1/ECM1/VEGFC/CD109/ANXA5/SERPINA1/PECAM1
	EC	R-HSA-3000178	ECM proteoglycans	9.89427e-06	0.00704472	11	LAMB1/VTN/LAMA4/FN1/LAMA5/LAMC1/HSPG2/ITGB1/COL4A3/BGN/COL4A1
	EC	R-HSA-1474228	Degradation of the extracellular matrix	1.13038e-05	0.00804828	15	MMP25/LAMB1/TIMP1/FN1/NID1/LAMA5/ADAMTS8/LAMC1/ADAM10/HSPG2/CAST/ADAMTS9/COL4A3/BSG/COL4A1
	EC	R-HSA-9006934	Signaling by Receptor Tyrosine Kinases	1.80219e-05	0.0128316	30	FLT4/CTNNA1/KITLG/LAMB1/JAK2/FLT1/CAV1/GRB10/HSPB1/LAMA4/FN1/KDR/ADORA2A/LAMA5/LAMC1/ADAM10/DUSP6/IGF1R/GRB7/ITGB1/VEGFC/ITPR1/TIAM1/NCK1/NOS3/COL4A3/YES1/CDH5/COL4A1/MAPK12
	EC	R-HSA-194138	Signaling by VEGF	5.45699e-05	0.0388538	12	FLT4/CTNNA1/FLT1/CAV1/HSPB1/KDR/VEGFC/ITPR1/NCK1/NOS3/CDH5/MAPK12
	EC	R-HSA-76002	Platelet activation, signaling and aggregation	6.56642e-05	0.0467529	20	PRKCH/ACTN1/TIMP1/SYTL4/DGKH/VWF/FN1/SRGN/ABCC4/GNG11/ACTN4/MMRN1/ECM1/VEGFC/ITPR1/CD109/ANXA5/F2R/SERPINA1/PECAM1
	A	R-HSA-425407	SLC-mediated transmembrane transport	1.1707e-06	0.000629836	18	SLC7A2/SLC1A3/SLC4A4/SLC1A2/SLC1A4/SLC27A1/SLC6A11/SLC41A1/SLC14A1/SLC44A3/SLC20A1/SLC7A11/SLC13A3/SLC15A2/SLC2A4/SLC25A18/SLC22A4/SLC2A10
	A	R-HSA-1474244	Extracellular matrix organization	6.90312e-05	0.0371388	17	CD44/TNC/LTBP1/P4HA2/TGFB2/NCAN/ITGA7/THBS1/HAPLN1/ADAMTS3/MMP14/VCAM1/DDR2/ITGA2/HTRA1/A2M/LAMA2
	O	R-HSA-1474244	Extracellular matrix organization	6.14478e-08	2.33502e-05	18	DCN/ITGA8/ADAMTS2/COL20A1/PCOLCE/COL1A1/COL12A1/EFEMP1/BMP4/ITGB4/ADAM12/MMP16/ACAN/SDC3/COL1A2/MFAP4/COL3A1/DDR1
	O	R-HSA-1474290	Collagen formation	2.0805e-05	0.00790589	8	ADAMTS2/COL20A1/PCOLCE/COL1A1/COL12A1/ITGB4/COL1A2/COL3A1
	O	R-HSA-3000170	Syndecan interactions	2.19784e-05	0.00835179	5	COL1A1/ITGB4/SDC3/COL1A2/COL3A1
	O	R-HSA-1650814	Collagen biosynthesis and modifying enzymes	2.42066e-05	0.0091985	7	ADAMTS2/COL20A1/PCOLCE/COL1A1/COL12A1/COL1A2/COL3A1
	O	R-HSA-1793185	Chondroitin sulfate/dermatan sulfate metabolism	4.26119e-05	0.0161925	6	DCN/XYLT1/UST/CHST3/SDC3/CHST11
	O	R-HSA-3781865	Diseases of glycosylation	7.48359e-05	0.0284376	9	DCN/ADAMTS2/CHST3/ADAMTSL4/ADAMTSL3/ACAN/SDC3/PRELP/SPON1
	O	R-HSA-112316	Neuronal System	8.31896e-05	0.031612	15	GABRA3/RASGRF1/CACNG4/HCN2/CHRNA4/NCALD/SLITRK3/GRIA3/KCNMB4/GRIK4/LRFN2/LRRTM4/SLITRK1/KCNH8/LRRTM3
	O	R-HSA-3000171	Non-integrin membrane-ECM interactions	0.000109808	0.0417271	6	COL1A1/ITGB4/SDC3/COL1A2/COL3A1/DDR1

## Sheet: S4B Table - Upregulated
		Cell	Pathway_ID	Name	p	Bonferroni	#Genes	Genes
		M	R-HSA-6798695	Neutrophil degranulation	3.88012e-21	2.88681e-18	55	FGR/ITGAL/TYROBP/LTF/RNASET2/TNFRSF1B/GRN/CYBA/STK10/PTPRC/B4GALT1/CMTM6/CTSZ/CST3/COTL1/GSDMD/TSPAN14/TCIRG1/CTSD/VAMP8/HVCN1/C3/SLC44A2/GMFG/LGALS3/DOCK2/GNS/TLR2/GLIPR1/ITGAX/GALNS/CD53/FCGR2A/S100A8/DOK3/FCER1G/ITGB2/NBEAL2/HK3/FCGR3B/CTSS/S100A9/CYBB/PTAFR/ITGAM/CD14/FPR1/C3AR1/HPSE/METTL7A/C5AR1/PNP/HSPA1A/NFAM1/PLEKHO2
		M	R-HSA-449147	Signaling by Interleukins	1.26562e-14	9.41624e-12	45	CD4/TNFRSF1B/MAP2K3/TNFRSF1A/NFKB2/IL4R/ICAM1/HMOX1/CSF2RB/NFKBIB/EBI3/TGFB1/CCL2/IL10RA/CD86/MAPKAPK3/RPS6KA1/CSF3R/F13A1/HAVCR2/LCP1/CASP1/ITGAX/VAV1/ITGB2/IL6R/MAPKAPK2/CCR1/STAT6/TNIP2/INPP5D/PTAFR/ITGAM/FPR1/JUNB/BCL2L1/PIK3CD/IL16/MYD88/RELA/CSF1R/CSF1/SOCS3/PSMB8/LYN
		M	R-HSA-168898	Toll-like Receptor Cascades	2.31145e-13	1.71972e-10	25	BTK/MAP2K3/NFKB2/NFKBIB/UNC93B1/MAPKAPK3/RPS6KA1/TICAM1/CNPY3/TLR2/S100A8/ITGB2/MAPKAPK2/CTSS/S100A9/TNIP2/ITGAM/CD14/MYD88/RELA/TLR1/TLR6/TLR5/TLR7/PLCG2
		M	R-HSA-5260271	Diseases of Immune System	6.16364e-12	4.58575e-09	11	BTK/NFKB2/UNC93B1/TICAM1/TLR2/CD14/MYD88/RELA/TLR1/TLR6/TLR5
		M	R-HSA-5602358	Diseases associated with the TLR signaling cascade	6.16364e-12	4.58575e-09	11	BTK/NFKB2/UNC93B1/TICAM1/TLR2/CD14/MYD88/RELA/TLR1/TLR6/TLR5
		M	R-HSA-1236975	Antigen processing-Cross presentation	5.26322e-09	3.91583e-06	16	BTK/CYBA/ITGB5/NCF4/NCF2/VAMP8/TLR2/CTSS/CYBB/CD14/MYD88/TLR1/TLR6/PSMB8/TAPBP/MRC1
		M	R-HSA-166016	Toll Like Receptor 4 (TLR4) Cascade	7.34393e-09	5.46389e-06	18	BTK/MAP2K3/NFKB2/NFKBIB/MAPKAPK3/RPS6KA1/TICAM1/TLR2/ITGB2/MAPKAPK2/TNIP2/ITGAM/CD14/MYD88/RELA/TLR1/TLR6/PLCG2
		M	R-HSA-5602498	MyD88 deficiency (TLR2/4)	5.95494e-08	4.43047e-05	6	BTK/TLR2/CD14/MYD88/TLR1/TLR6
		M	R-HSA-5603041	IRAK4 deficiency (TLR2/4)	1.28128e-07	9.53273e-05	6	BTK/TLR2/CD14/MYD88/TLR1/TLR6
		M	R-HSA-6785807	Interleukin-4 and Interleukin-13 signaling	1.29763e-07	9.65438e-05	15	TNFRSF1B/IL4R/ICAM1/HMOX1/TGFB1/CCL2/F13A1/ITGAX/ITGB2/IL6R/STAT6/ITGAM/JUNB/BCL2L1/SOCS3
		M	R-HSA-166058	MyD88:MAL(TIRAP) cascade initiated on plasma membrane	1.61434e-07	0.000120107	14	BTK/MAP2K3/NFKB2/NFKBIB/MAPKAPK3/RPS6KA1/TLR2/MAPKAPK2/TNIP2/CD14/MYD88/RELA/TLR1/TLR6
		M	R-HSA-168188	Toll Like Receptor TLR6:TLR2 Cascade	1.61434e-07	0.000120107	14	BTK/MAP2K3/NFKB2/NFKBIB/MAPKAPK3/RPS6KA1/TLR2/MAPKAPK2/TNIP2/CD14/MYD88/RELA/TLR1/TLR6
		M	R-HSA-114604	GPVI-mediated activation cascade	2.01424e-07	0.000149859	9	LCP2/PIK3CG/RAC2/PIK3R5/VAV1/RHOB/FCER1G/PLCG2/LYN
		M	R-HSA-168179	Toll Like Receptor TLR1:TLR2 Cascade	2.40144e-07	0.000178667	14	BTK/MAP2K3/NFKB2/NFKBIB/MAPKAPK3/RPS6KA1/TLR2/MAPKAPK2/TNIP2/CD14/MYD88/RELA/TLR1/TLR6
		M	R-HSA-181438	Toll Like Receptor 2 (TLR2) Cascade	2.40144e-07	0.000178667	14	BTK/MAP2K3/NFKB2/NFKBIB/MAPKAPK3/RPS6KA1/TLR2/MAPKAPK2/TNIP2/CD14/MYD88/RELA/TLR1/TLR6
		M	R-HSA-6783783	Interleukin-10 signaling	2.89629e-07	0.000215484	10	TNFRSF1B/TNFRSF1A/ICAM1/CCL2/IL10RA/CD86/CCR1/PTAFR/FPR1/CSF1
		M	R-HSA-975138	TRAF6 mediated induction of NFkB and MAP kinases upon TLR7/8 or 9 activation	5.2793e-06	0.0039278	12	MAP2K3/NFKB2/NFKBIB/MAPKAPK3/RPS6KA1/TICAM1/MAPKAPK2/TNIP2/CD14/MYD88/RELA/TLR7
		M	R-HSA-168181	Toll Like Receptor 7/8 (TLR7/8) Cascade	5.91229e-06	0.00439875	12	MAP2K3/NFKB2/NFKBIB/MAPKAPK3/RPS6KA1/TICAM1/MAPKAPK2/TNIP2/CD14/MYD88/RELA/TLR7
		M	R-HSA-975155	MyD88 dependent cascade initiated on endosome	5.91229e-06	0.00439875	12	MAP2K3/NFKB2/NFKBIB/MAPKAPK3/RPS6KA1/TICAM1/MAPKAPK2/TNIP2/CD14/MYD88/RELA/TLR7
		M	R-HSA-5686938	Regulation of TLR by endogenous ligand	6.30058e-06	0.00468763	6	TLR2/S100A8/S100A9/CD14/TLR1/TLR6
		M	R-HSA-168138	Toll Like Receptor 9 (TLR9) Cascade	9.16111e-06	0.00681586	12	MAP2K3/NFKB2/NFKBIB/MAPKAPK3/RPS6KA1/TICAM1/MAPKAPK2/TNIP2/CD14/MYD88/RELA/TLR7
		M	R-HSA-5668599	RHO GTPases Activate NADPH Oxidases	1.30083e-05	0.00967815	5	CYBA/NCF4/NCF2/RAC2/CYBB
		M	R-HSA-983695	Antigen activates B Cell Receptor (BCR) leading to generation of second messengers	1.52447e-05	0.011342	7	BTK/CD22/VAV1/PIK3AP1/PIK3CD/PLCG2/LYN
		M	R-HSA-2871809	FCERI mediated Ca+2 mobilization	1.89188e-05	0.0140756	7	BTK/LCP2/NFATC1/VAV1/FCER1G/PLCG2/LYN
		M	R-HSA-9006335	Signaling by Erythropoietin	2.79815e-05	0.0208183	6	PIK3CG/PIK3R5/VAV1/PIK3CD/PLCG2/LYN
		M	R-HSA-983705	Signaling by the B Cell Receptor (BCR)	3.59442e-05	0.0267425	12	BTK/CD22/NFKBIB/NFATC1/VAV1/PIK3AP1/PIK3CD/RELA/PLCG2/CARD11/PSMB8/LYN
		M	R-HSA-1810476	RIP-mediated NFkB activation via ZBP1	5.73668e-05	0.0426809	5	NFKB2/NFKBIB/TICAM1/MYD88/RELA
		M	R-HSA-76002	Platelet activation, signaling and aggregation	5.99535e-05	0.0446054	19	LCP2/APBB1IP/CSK/TGFB1/PIK3CG/SERPINE1/LGALS3BP/PLEK/F13A1/RAC2/TLN1/ARRB2/PIK3R5/VAV1/RHOB/FERMT3/FCER1G/PLCG2/LYN
		M	R-HSA-202733	Cell surface interactions at the vascular wall	6.1893e-05	0.0460484	13	ITGAL/CD74/CD84/TGFB1/SELPLG/ITGAX/SLC7A7/FCER1G/ITGB2/INPP5D/ITGAM/SPN/LYN
		EC	R-HSA-1474244	Extracellular matrix organization	1.98595e-09	1.17568e-06	26	MMP25/NID2/TIMP1/ICAM2/VWF/LAMA4/FN1/NID1/KDR/LAMA5/LOXL2/LAMC1/ADAM10/FBLN5/HSPG2/SERPINH1/ITGB1/CAST/ADAMTS9/CRTAP/BSG/CD151/BGN/COL4A1/ITGA1/PECAM1
		EC	R-HSA-3000157	Laminin interactions	9.46234e-09	5.60171e-06	9	NID2/LAMA4/NID1/LAMA5/LAMC1/HSPG2/ITGB1/COL4A1/ITGA1
		EC	R-HSA-114608	Platelet degranulation	4.70637e-06	0.00278617	13	TIMP1/SYTL4/VWF/FN1/SRGN/ABCC4/ACTN4/MMRN1/VEGFC/CD109/ANXA5/SERPINA1/PECAM1
		EC	R-HSA-76005	Response to elevated platelet cytosolic Ca2+	7.17614e-06	0.00424828	13	TIMP1/SYTL4/VWF/FN1/SRGN/ABCC4/ACTN4/MMRN1/VEGFC/CD109/ANXA5/SERPINA1/PECAM1
		EC	R-HSA-216083	Integrin cell surface interactions	1.54481e-05	0.00914526	10	ICAM2/VWF/FN1/KDR/HSPG2/ITGB1/BSG/COL4A1/ITGA1/PECAM1
		EC	R-HSA-1474228	Degradation of the extracellular matrix	5.59924e-05	0.0331475	12	MMP25/TIMP1/FN1/NID1/LAMA5/LAMC1/ADAM10/HSPG2/CAST/ADAMTS9/BSG/COL4A1
		A	R-HSA-425407	SLC-mediated transmembrane transport	1.48774e-06	0.000685847	15	SLC7A2/SLC1A3/SLC4A4/SLC1A4/SLC27A1/SLC6A11/SLC41A1/SLC14A1/SLC44A3/SLC7A11/SLC15A2/SLC2A4/SLC25A18/SLC22A4/SLC2A10
		A	R-HSA-1474244	Extracellular matrix organization	1.73686e-05	0.0080069	15	CD44/TNC/LTBP1/P4HA2/TGFB2/NCAN/ITGA7/THBS1/MMP14/VCAM1/DDR2/ITGA2/HTRA1/A2M/LAMA2
		A	R-HSA-2219530	Constitutive Signaling by Aberrant PI3K in Cancer	5.32794e-05	0.0245618	7	HGF/FGFR2/FGFR1/FGF1/ERBB2/EGFR/IRS2
		O	R-HSA-1474244	Extracellular matrix organization	1.40002e-07	3.55604e-05	13	DCN/ITGA8/ADAMTS2/PCOLCE/COL1A1/EFEMP1/ITGB4/ADAM12/ACAN/COL1A2/MFAP4/COL3A1/DDR1
		O	R-HSA-3000178	ECM proteoglycans	1.43435e-05	0.00364325	6	DCN/ITGA8/COL1A1/ACAN/COL1A2/COL3A1
		O	R-HSA-3000170	Syndecan interactions	3.45879e-05	0.00878533	4	COL1A1/ITGB4/COL1A2/COL3A1
		O	R-HSA-1474290	Collagen formation	3.78092e-05	0.00960354	6	ADAMTS2/PCOLCE/COL1A1/ITGB4/COL1A2/COL3A1
		O	R-HSA-3781865	Diseases of glycosylation	4.86629e-05	0.0123604	7	DCN/ADAMTS2/CHST3/ADAMTSL3/ACAN/PRELP/SPON1
		O	R-HSA-3000171	Non-integrin membrane-ECM interactions	5.51041e-05	0.0139964	5	COL1A1/ITGB4/COL1A2/COL3A1/DDR1
		O	R-HSA-2022090	Assembly of collagen fibrils and other multimeric structures	6.47721e-05	0.0164521	5	PCOLCE/COL1A1/ITGB4/COL1A2/COL3A1
		O	R-HSA-114604	GPVI-mediated activation cascade	9.89073e-05	0.0251225	4	FYN/COL1A1/PIK3R3/COL1A2
		O	R-HSA-1650814	Collagen biosynthesis and modifying enzymes	0.000101773	0.0258503	5	ADAMTS2/PCOLCE/COL1A1/COL1A2/COL3A1
		O	R-HSA-75892	Platelet Adhesion to exposed collagen	0.000141723	0.0359976	3	FYN/COL1A1/COL1A2
		O	R-HSA-3560782	Diseases associated with glycosaminoglycan metabolism	0.000185315	0.04707	4	DCN/CHST3/ACAN/PRELP
		O	R-HSA-8875878	MET promotes cell motility	0.000185315	0.04707	4	COL1A1/TNS3/COL1A2/COL3A1

## Sheet: S4C Table -Downregulated
		Cell	Pathway_ID	Name	p	Bonferroni	#Genes	Genes
		N	R-HSA-112316	Neuronal System	5.2144e-19	2.88357e-16	41	ABCC8/CACNG3/SYN1/NRXN3/SYT1/SLC32A1/GLRA2/GRIN2D/RAB3A/RASGRF2/GABRG2/GAD1/SNAP25/GAD2/STXBP1/HCN4/CACNA1A/KCNH1/PPFIA4/GRIP2/GLRA3/CACNA1B/HTR3B/CACNA2D1/KCNS2/CACNA2D3/GJD2/CHRNB2/SHANK2/HCN1/ADCY1/KCNC2/CACNG2/CPLX1/KCNG3/BEGAIN/GRIN2A/SYN3/KCNQ5/IL1RAPL2/GRIN2B
		N	R-HSA-112315	Transmission across Chemical Synapses	2.53005e-14	1.39912e-11	28	CACNG3/SYN1/SYT1/SLC32A1/GLRA2/GRIN2D/RAB3A/RASGRF2/GABRG2/GAD1/SNAP25/GAD2/STXBP1/CACNA1A/PPFIA4/GRIP2/GLRA3/CACNA1B/HTR3B/CACNA2D1/CACNA2D3/CHRNB2/ADCY1/CACNG2/CPLX1/GRIN2A/SYN3/GRIN2B
		N	R-HSA-181429	Serotonin Neurotransmitter Release Cycle	1.1905e-09	6.58346e-07	8	SYN1/SYT1/RAB3A/SNAP25/STXBP1/PPFIA4/CPLX1/SYN3
		N	R-HSA-888590	GABA synthesis, release, reuptake and degradation	2.01945e-09	1.11676e-06	8	SYT1/SLC32A1/RAB3A/GAD1/SNAP25/GAD2/STXBP1/CPLX1
		N	R-HSA-112310	Neurotransmitter release cycle	6.04203e-09	3.34124e-06	11	SYN1/SYT1/SLC32A1/RAB3A/GAD1/SNAP25/GAD2/STXBP1/PPFIA4/CPLX1/SYN3
		N	R-HSA-212676	Dopamine Neurotransmitter Release Cycle	1.21864e-08	6.7391e-06	8	SYN1/SYT1/RAB3A/SNAP25/STXBP1/PPFIA4/CPLX1/SYN3
		N	R-HSA-264642	Acetylcholine Neurotransmitter Release Cycle	8.03982e-07	0.000444602	6	SYT1/RAB3A/SNAP25/STXBP1/PPFIA4/CPLX1
		N	R-HSA-181430	Norepinephrine Neurotransmitter Release Cycle	1.18497e-06	0.00065529	6	SYT1/RAB3A/SNAP25/STXBP1/PPFIA4/CPLX1
		N	R-HSA-112308	Presynaptic depolarization and calcium channel opening	4.3189e-06	0.00238835	5	CACNA1A/CACNA1B/CACNA2D1/CACNA2D3/CACNG2
		N	R-HSA-210500	Glutamate Neurotransmitter Release Cycle	7.73286e-06	0.00427627	6	SYT1/RAB3A/SNAP25/STXBP1/PPFIA4/CPLX1
		N	R-HSA-3928665	EPH-ephrin mediated repulsion of cells	9.55136e-06	0.0052819	8	EPHA3/EPHA8/EPHA6/DNM1/EPHB2/EFNA3/EPHA10/EFNA5
		N	R-HSA-6794362	Protein-protein interactions at synapses	1.29401e-05	0.00715589	10	NRXN3/SYT1/GRIN2D/STXBP1/PPFIA4/SHANK2/BEGAIN/GRIN2A/IL1RAPL2/GRIN2B
		N	R-HSA-8986944	Transcriptional Regulation by MECP2	1.69956e-05	0.00939856	8	MET/OPRM1/GAD1/GAD2/CRH/SST/GRIN2A/GRIN2B
		N	R-HSA-6794361	Neurexins and neuroligins	1.94749e-05	0.0107696	8	NRXN3/SYT1/GRIN2D/STXBP1/SHANK2/BEGAIN/GRIN2A/GRIN2B
		N	R-HSA-2682334	EPH-Ephrin signaling	2.12903e-05	0.0117735	10	EPHA3/EPHA8/PAK3/EPHA6/DNM1/EPHB2/EFNA3/EPHA10/EFNA5/GRIN2B
		N	R-HSA-112314	Neurotransmitter receptors and postsynaptic signal transmission	2.32237e-05	0.0128427	13	CACNG3/GLRA2/GRIN2D/RASGRF2/GABRG2/GRIP2/GLRA3/HTR3B/CHRNB2/ADCY1/CACNG2/GRIN2A/GRIN2B
		N	R-HSA-3928663	EPHA-mediated growth cone collapse	3.07106e-05	0.016983	6	EPHA3/EPHA8/EPHA6/EFNA3/EPHA10/EFNA5
		N	R-HSA-168799	Neurotoxicity of clostridium toxins	3.55915e-05	0.0196821	4	SYT1/SV2C/SNAP25/SV2B
		N	R-HSA-5576891	Cardiac conduction	3.90258e-05	0.0215813	12	CACNG3/NOS1/ATP1A3/FKBP1B/CACNA2D1/CACNA2D3/NPPC/SCN3B/CACNG2/SCN5A/KCNIP4/FXYD7
		N	R-HSA-500792	GPCR ligand binding	8.59334e-05	0.0475212	23	OPN3/NTSR1/CRHR2/OPRM1/TACR1/CNR1/PRLHR/CHRM3/ADCYAP1/PTH2R/CRHBP/VIP/CRH/DRD2/SST/GRM2/GALR1/TAC3/DRD5/RXFP1/PENK/NPY2R/CCK
		M	R-HSA-114508	Effects of PIP2 hydrolysis	2.62149e-05	0.00833632	4	DGKD/ABHD12/PRKCD/DAGLB
		O	R-HSA-112316	Neuronal System	1.44581e-06	0.00032097	12	GABRA3/RASGRF1/CACNG4/CHRNA4/NCALD/SLITRK3/GRIA3/LRFN2/LRRTM4/SLITRK1/KCNH8/LRRTM3
		O	R-HSA-6794362	Protein-protein interactions at synapses	1.22935e-05	0.00272917	6	SLITRK3/GRIA3/LRFN2/LRRTM4/SLITRK1/LRRTM3
