# Supplementary material for: ESHRD: deconvolution of brain homogenate RNA expression data to identify cell-type-specific alterations in Alzheimer’s disease
Source: Aging (Albany NY). 2020 Mar 2;12(5):4124–62. doi: 10.18632/aging.102840 (PMC7093163; doi:10.18632/aging.102840)
Supplement: Supplementary Table 5 [file aging-12-102840-s005..xlsx]

## Sheet: S5A Table - TCX All Genes
		Cell	GO_Group	DataSetID	DataSetName	p	Bonferroni	#Genes	Genes
		A	GO|GO.BP	GO:0048731	system development	1.19324e-13	1.35981e-08	100	183 (AGT)|205 (AK4)|249 (ALPL)|558 (AXL)|627 (BDNF)|658 (BMPR1B)|960 (CD44)|1363 (CPE)|1404 (HAPLN1)|1463 (NCAN)|1545 (CYP1B1)|1821 (DRP2)|1956 (EGFR)|2013 (EMP2)|2049 (EPHB3)|2064 (ERBB2)|2173 (FABP7)|2239 (GPC4)|2260 (FGFR1)|2560 (GABRB1)|2670 (GFAP)|2697 (GJA1)|2735 (GLI1)|2736 (GLI2)|2737 (GLI3)|2746 (GLUD1)|3082 (HGF)|3371 (TNC)|3373 (HYAL1)|3400 (ID4)|3679 (ITGA7)|4052 (LTBP1)|4129 (MAOB)|4…
		A	GO|GO.BP	GO:0009653	anatomical structure morphogenesis	1.29261e-13	1.47306e-08	69	183 (AGT)|249 (ALPL)|558 (AXL)|627 (BDNF)|658 (BMPR1B)|960 (CD44)|1363 (CPE)|1545 (CYP1B1)|1956 (EGFR)|2013 (EMP2)|2049 (EPHB3)|2064 (ERBB2)|2239 (GPC4)|2260 (FGFR1)|2735 (GLI1)|2736 (GLI2)|2737 (GLI3)|3082 (HGF)|3371 (TNC)|3373 (HYAL1)|3400 (ID4)|3679 (ITGA7)|4211 (MEIS1)|4323 (MMP14)|4488 (MSX2)|4853 (NOTCH2)|4854 (NOTCH3)|5013 (OTX1)|5080 (PAX6)|5364 (PLXNB1)|5454 (POU3F2)|5465 (PPARA)|5654 (H…
		A	GO|GO.BP	GO:0050793	regulation of developmental process	1.36733e-13	1.55821e-08	69	183 (AGT)|558 (AXL)|627 (BDNF)|658 (BMPR1B)|960 (CD44)|1545 (CYP1B1)|1956 (EGFR)|2013 (EMP2)|2049 (EPHB3)|2064 (ERBB2)|2239 (GPC4)|2260 (FGFR1)|2670 (GFAP)|2735 (GLI1)|2736 (GLI2)|2737 (GLI3)|3082 (HGF)|3373 (HYAL1)|3400 (ID4)|3679 (ITGA7)|4211 (MEIS1)|4323 (MMP14)|4488 (MSX2)|4853 (NOTCH2)|4854 (NOTCH3)|4921 (DDR2)|5080 (PAX6)|5364 (PLXNB1)|5454 (POU3F2)|5465 (PPARA)|5764 (PTN)|5803 (PTPRZ1)|592…
		A	GO|GO.BP	GO:0007399	nervous system development	1.44063e-13	1.64174e-08	64	183 (AGT)|205 (AK4)|558 (AXL)|627 (BDNF)|658 (BMPR1B)|1404 (HAPLN1)|1463 (NCAN)|1821 (DRP2)|1956 (EGFR)|2049 (EPHB3)|2064 (ERBB2)|2173 (FABP7)|2239 (GPC4)|2260 (FGFR1)|2560 (GABRB1)|2670 (GFAP)|2735 (GLI1)|2736 (GLI2)|2737 (GLI3)|2746 (GLUD1)|3082 (HGF)|3371 (TNC)|3400 (ID4)|4129 (MAOB)|4211 (MEIS1)|4323 (MMP14)|4853 (NOTCH2)|4854 (NOTCH3)|5013 (OTX1)|5080 (PAX6)|5364 (PLXNB1)|5454 (POU3F2)|5764 …
		A	GO|GO.BP	GO:0009887	animal organ morphogenesis	7.68816e-13	8.76143e-08	39	183 (AGT)|249 (ALPL)|658 (BMPR1B)|1363 (CPE)|1956 (EGFR)|2239 (GPC4)|2260 (FGFR1)|2735 (GLI1)|2736 (GLI2)|2737 (GLI3)|3082 (HGF)|3371 (TNC)|3373 (HYAL1)|3400 (ID4)|4211 (MEIS1)|4323 (MMP14)|4488 (MSX2)|4853 (NOTCH2)|5013 (OTX1)|5080 (PAX6)|5465 (PPARA)|5654 (HTRA1)|5764 (PTN)|6662 (SOX9)|7042 (TGFB2)|7289 (TULP3)|9231 (DLG5)|10082 (GPC6)|10253 (SPRY2)|10804 (GJB6)|26018 (LRIG1)|27031 (NPHP3)|5143…
		A	GO|GO.BP	GO:0048513	animal organ development	2.65131e-12	3.02144e-07	79	183 (AGT)|205 (AK4)|249 (ALPL)|558 (AXL)|658 (BMPR1B)|960 (CD44)|1363 (CPE)|1545 (CYP1B1)|1956 (EGFR)|2049 (EPHB3)|2064 (ERBB2)|2173 (FABP7)|2239 (GPC4)|2260 (FGFR1)|2697 (GJA1)|2735 (GLI1)|2736 (GLI2)|2737 (GLI3)|2746 (GLUD1)|3082 (HGF)|3371 (TNC)|3373 (HYAL1)|3400 (ID4)|3679 (ITGA7)|4052 (LTBP1)|4129 (MAOB)|4211 (MEIS1)|4323 (MMP14)|4488 (MSX2)|4853 (NOTCH2)|4854 (NOTCH3)|4921 (DDR2)|5013 (OTX1…
		A	GO|GO.BP	GO:0051239	regulation of multicellular organismal process	1.7815e-11	2.0302e-06	72	136 (ADORA2B)|183 (AGT)|477 (ATP1A2)|482 (ATP1B2)|558 (AXL)|627 (BDNF)|658 (BMPR1B)|1545 (CYP1B1)|1956 (EGFR)|2013 (EMP2)|2049 (EPHB3)|2064 (ERBB2)|2239 (GPC4)|2260 (FGFR1)|2670 (GFAP)|2697 (GJA1)|2735 (GLI1)|2736 (GLI2)|2737 (GLI3)|3082 (HGF)|3373 (HYAL1)|3400 (ID4)|3931 (LCAT)|4052 (LTBP1)|4163 (MCC)|4211 (MEIS1)|4323 (MMP14)|4488 (MSX2)|4853 (NOTCH2)|4854 (NOTCH3)|4921 (DDR2)|5080 (PAX6)|5166 …
		A	GO|GO.BP	GO:2000026	regulation of multicellular organismal development	2.33052e-11	2.65586e-06	56	183 (AGT)|558 (AXL)|627 (BDNF)|658 (BMPR1B)|1545 (CYP1B1)|1956 (EGFR)|2013 (EMP2)|2049 (EPHB3)|2064 (ERBB2)|2239 (GPC4)|2260 (FGFR1)|2670 (GFAP)|2735 (GLI1)|2736 (GLI2)|2737 (GLI3)|3082 (HGF)|3373 (HYAL1)|3400 (ID4)|4211 (MEIS1)|4323 (MMP14)|4488 (MSX2)|4853 (NOTCH2)|4854 (NOTCH3)|4921 (DDR2)|5080 (PAX6)|5364 (PLXNB1)|5454 (POU3F2)|5465 (PPARA)|5764 (PTN)|5803 (PTPRZ1)|5925 (RB1)|5992 (RFX4)|6657…
		A	GO|GO.BP	GO:0010646	regulation of cell communication	2.34581e-11	2.67328e-06	78	2 (A2M)|136 (ADORA2B)|183 (AGT)|477 (ATP1A2)|558 (AXL)|627 (BDNF)|658 (BMPR1B)|960 (CD44)|1545 (CYP1B1)|1607 (DGKB)|1956 (EGFR)|2013 (EMP2)|2049 (EPHB3)|2064 (ERBB2)|2239 (GPC4)|2260 (FGFR1)|2670 (GFAP)|2697 (GJA1)|2735 (GLI1)|2736 (GLI2)|2737 (GLI3)|2746 (GLUD1)|3082 (HGF)|4052 (LTBP1)|4163 (MCC)|4323 (MMP14)|4488 (MSX2)|4828 (NMB)|4853 (NOTCH2)|4854 (NOTCH3)|4921 (DDR2)|5364 (PLXNB1)|5654 (HTRA…
		A	GO|GO.BP	GO:0023051	regulation of signaling	3.85454e-11	4.39263e-06	78	2 (A2M)|136 (ADORA2B)|183 (AGT)|477 (ATP1A2)|558 (AXL)|627 (BDNF)|658 (BMPR1B)|960 (CD44)|1545 (CYP1B1)|1607 (DGKB)|1956 (EGFR)|2013 (EMP2)|2049 (EPHB3)|2064 (ERBB2)|2239 (GPC4)|2260 (FGFR1)|2670 (GFAP)|2697 (GJA1)|2735 (GLI1)|2736 (GLI2)|2737 (GLI3)|2746 (GLUD1)|3082 (HGF)|4052 (LTBP1)|4163 (MCC)|4323 (MMP14)|4488 (MSX2)|4828 (NMB)|4853 (NOTCH2)|4854 (NOTCH3)|4921 (DDR2)|5364 (PLXNB1)|5654 (HTRA…
		A	GO|GO.BP	GO:0007155	cell adhesion	4.3274e-11	4.93151e-06	44	482 (ATP1B2)|558 (AXL)|960 (CD44)|1404 (HAPLN1)|1463 (NCAN)|1545 (CYP1B1)|1956 (EGFR)|2013 (EMP2)|2049 (EPHB3)|2064 (ERBB2)|2239 (GPC4)|2736 (GLI2)|2737 (GLI3)|3371 (TNC)|3373 (HYAL1)|3679 (ITGA7)|4323 (MMP14)|4921 (DDR2)|5364 (PLXNB1)|5465 (PPARA)|5764 (PTN)|6657 (SOX2)|6662 (SOX9)|7042 (TGFB2)|7057 (THBS1)|7060 (THBS4)|7412 (VCAM1)|7430 (EZR)|8404 (SPARCL1)|9071 (CLDN10)|9231 (DLG5)|10125 (RASG…
		A	GO|GO.BP	GO:0022610	biological adhesion	5.21267e-11	5.94035e-06	44	482 (ATP1B2)|558 (AXL)|960 (CD44)|1404 (HAPLN1)|1463 (NCAN)|1545 (CYP1B1)|1956 (EGFR)|2013 (EMP2)|2049 (EPHB3)|2064 (ERBB2)|2239 (GPC4)|2736 (GLI2)|2737 (GLI3)|3371 (TNC)|3373 (HYAL1)|3679 (ITGA7)|4323 (MMP14)|4921 (DDR2)|5364 (PLXNB1)|5465 (PPARA)|5764 (PTN)|6657 (SOX2)|6662 (SOX9)|7042 (TGFB2)|7057 (THBS1)|7060 (THBS4)|7412 (VCAM1)|7430 (EZR)|8404 (SPARCL1)|9071 (CLDN10)|9231 (DLG5)|10125 (RASG…
		A	GO|GO.BP	GO:0032502	developmental process	8.9439e-11	1.01925e-05	111	2 (A2M)|183 (AGT)|205 (AK4)|249 (ALPL)|558 (AXL)|627 (BDNF)|658 (BMPR1B)|960 (CD44)|1363 (CPE)|1404 (HAPLN1)|1463 (NCAN)|1545 (CYP1B1)|1821 (DRP2)|1956 (EGFR)|2013 (EMP2)|2049 (EPHB3)|2064 (ERBB2)|2173 (FABP7)|2239 (GPC4)|2260 (FGFR1)|2560 (GABRB1)|2670 (GFAP)|2697 (GJA1)|2735 (GLI1)|2736 (GLI2)|2737 (GLI3)|2746 (GLUD1)|3082 (HGF)|3371 (TNC)|3373 (HYAL1)|3400 (ID4)|3679 (ITGA7)|4052 (LTBP1)|4129 …
		A	GO|GO.BP	GO:0009888	tissue development	1.08795e-10	1.23983e-05	53	183 (AGT)|249 (ALPL)|658 (BMPR1B)|960 (CD44)|1545 (CYP1B1)|1956 (EGFR)|2239 (GPC4)|2260 (FGFR1)|2735 (GLI1)|2736 (GLI2)|2737 (GLI3)|3082 (HGF)|3371 (TNC)|3373 (HYAL1)|3400 (ID4)|3679 (ITGA7)|4211 (MEIS1)|4323 (MMP14)|4488 (MSX2)|4921 (DDR2)|5080 (PAX6)|5454 (POU3F2)|5465 (PPARA)|5764 (PTN)|5925 (RB1)|6574 (SLC20A1)|6657 (SOX2)|6662 (SOX9)|7042 (TGFB2)|7227 (TRPS1)|7289 (TULP3)|7430 (EZR)|9231 (DL…
		A	GO|GO.BP	GO:0007275	multicellular organism development	1.15039e-10	1.31099e-05	100	183 (AGT)|205 (AK4)|249 (ALPL)|558 (AXL)|627 (BDNF)|658 (BMPR1B)|960 (CD44)|1363 (CPE)|1404 (HAPLN1)|1463 (NCAN)|1545 (CYP1B1)|1821 (DRP2)|1956 (EGFR)|2013 (EMP2)|2049 (EPHB3)|2064 (ERBB2)|2173 (FABP7)|2239 (GPC4)|2260 (FGFR1)|2560 (GABRB1)|2670 (GFAP)|2697 (GJA1)|2735 (GLI1)|2736 (GLI2)|2737 (GLI3)|2746 (GLUD1)|3082 (HGF)|3371 (TNC)|3373 (HYAL1)|3400 (ID4)|3679 (ITGA7)|4052 (LTBP1)|4129 (MAOB)|4…
		A	GO|GO.BP	GO:0045595	regulation of cell differentiation	1.29888e-10	1.4802e-05	50	183 (AGT)|558 (AXL)|627 (BDNF)|658 (BMPR1B)|1956 (EGFR)|2013 (EMP2)|2049 (EPHB3)|2064 (ERBB2)|2260 (FGFR1)|2670 (GFAP)|2735 (GLI1)|2736 (GLI2)|2737 (GLI3)|3082 (HGF)|3400 (ID4)|4211 (MEIS1)|4323 (MMP14)|4488 (MSX2)|4853 (NOTCH2)|4854 (NOTCH3)|4921 (DDR2)|5080 (PAX6)|5364 (PLXNB1)|5454 (POU3F2)|5465 (PPARA)|5764 (PTN)|5803 (PTPRZ1)|5925 (RB1)|6657 (SOX2)|6662 (SOX9)|7042 (TGFB2)|7057 (THBS1)|7227 …
		A	GO|GO.BP	GO:0009966	regulation of signal transduction	1.90157e-10	2.16703e-05	71	2 (A2M)|136 (ADORA2B)|183 (AGT)|558 (AXL)|627 (BDNF)|658 (BMPR1B)|960 (CD44)|1545 (CYP1B1)|1956 (EGFR)|2013 (EMP2)|2049 (EPHB3)|2064 (ERBB2)|2239 (GPC4)|2260 (FGFR1)|2697 (GJA1)|2735 (GLI1)|2736 (GLI2)|2737 (GLI3)|3082 (HGF)|4052 (LTBP1)|4163 (MCC)|4323 (MMP14)|4488 (MSX2)|4828 (NMB)|4853 (NOTCH2)|4854 (NOTCH3)|4921 (DDR2)|5364 (PLXNB1)|5654 (HTRA1)|5764 (PTN)|5783 (PTPN13)|5925 (RB1)|5992 (RFX4)…
		A	GO|GO.BP	GO:0032501	multicellular organismal process	2.12674e-10	2.42363e-05	125	2 (A2M)|136 (ADORA2B)|183 (AGT)|205 (AK4)|249 (ALPL)|361 (AQP4)|366 (AQP9)|477 (ATP1A2)|482 (ATP1B2)|558 (AXL)|627 (BDNF)|658 (BMPR1B)|954 (ENTPD2)|960 (CD44)|1363 (CPE)|1404 (HAPLN1)|1463 (NCAN)|1545 (CYP1B1)|1607 (DGKB)|1821 (DRP2)|1837 (DTNA)|1956 (EGFR)|2013 (EMP2)|2049 (EPHB3)|2064 (ERBB2)|2173 (FABP7)|2239 (GPC4)|2260 (FGFR1)|2560 (GABRB1)|2565 (GABRG1)|2670 (GFAP)|2697 (GJA1)|2735 (GLI1)|2…
		A	GO|GO.BP	GO:0048856	anatomical structure development	2.56543e-10	2.92357e-05	105	183 (AGT)|205 (AK4)|249 (ALPL)|558 (AXL)|627 (BDNF)|658 (BMPR1B)|960 (CD44)|1363 (CPE)|1404 (HAPLN1)|1463 (NCAN)|1545 (CYP1B1)|1821 (DRP2)|1956 (EGFR)|2013 (EMP2)|2049 (EPHB3)|2064 (ERBB2)|2173 (FABP7)|2239 (GPC4)|2260 (FGFR1)|2560 (GABRB1)|2670 (GFAP)|2697 (GJA1)|2735 (GLI1)|2736 (GLI2)|2737 (GLI3)|2746 (GLUD1)|3082 (HGF)|3371 (TNC)|3373 (HYAL1)|3400 (ID4)|3679 (ITGA7)|4052 (LTBP1)|4129 (MAOB)|4…
		A	GO|GO.BP	GO:0007154	cell communication	3.89219e-10	4.43553e-05	113	2 (A2M)|136 (ADORA2B)|183 (AGT)|477 (ATP1A2)|482 (ATP1B2)|558 (AXL)|627 (BDNF)|658 (BMPR1B)|954 (ENTPD2)|960 (CD44)|1363 (CPE)|1545 (CYP1B1)|1607 (DGKB)|1837 (DTNA)|1956 (EGFR)|2013 (EMP2)|2049 (EPHB3)|2064 (ERBB2)|2239 (GPC4)|2260 (FGFR1)|2560 (GABRB1)|2565 (GABRG1)|2670 (GFAP)|2697 (GJA1)|2735 (GLI1)|2736 (GLI2)|2737 (GLI3)|2746 (GLUD1)|3082 (HGF)|3371 (TNC)|3601 (IL15RA)|3679 (ITGA7)|4052 (LTB…
		A	GO|GO.BP	GO:0007417	central nervous system development	4.14056e-10	4.71858e-05	34	205 (AK4)|558 (AXL)|1404 (HAPLN1)|1463 (NCAN)|1821 (DRP2)|1956 (EGFR)|2049 (EPHB3)|2064 (ERBB2)|2173 (FABP7)|2260 (FGFR1)|2560 (GABRB1)|2670 (GFAP)|2735 (GLI1)|2736 (GLI2)|2737 (GLI3)|2746 (GLUD1)|3400 (ID4)|4129 (MAOB)|4854 (NOTCH3)|5013 (OTX1)|5080 (PAX6)|5454 (POU3F2)|5764 (PTN)|5803 (PTPRZ1)|5992 (RFX4)|6538 (SLC6A11)|6657 (SOX2)|6662 (SOX9)|7289 (TULP3)|8660 (IRS2)|9231 (DLG5)|23657 (SLC7A11…
		A	GO|GO.BP	GO:0022612	gland morphogenesis	4.71255e-10	5.37043e-05	13	1956 (EGFR)|2260 (FGFR1)|2735 (GLI1)|2736 (GLI2)|2737 (GLI3)|3082 (HGF)|3371 (TNC)|3400 (ID4)|4488 (MSX2)|5080 (PAX6)|5764 (PTN)|6662 (SOX9)|7042 (TGFB2)
		A	GO|GO.CC	GO:0044459	plasma membrane part	4.87225e-10	5.55242e-05	65	136 (ADORA2B)|361 (AQP4)|366 (AQP9)|477 (ATP1A2)|482 (ATP1B2)|558 (AXL)|658 (BMPR1B)|960 (CD44)|1363 (CPE)|1821 (DRP2)|1837 (DTNA)|1956 (EGFR)|2013 (EMP2)|2049 (EPHB3)|2064 (ERBB2)|2239 (GPC4)|2260 (FGFR1)|2560 (GABRB1)|2565 (GABRG1)|2697 (GJA1)|3679 (ITGA7)|4323 (MMP14)|4853 (NOTCH2)|4921 (DDR2)|5364 (PLXNB1)|5803 (PTPRZ1)|6507 (SLC1A3)|6509 (SLC1A4)|6517 (SLC2A4)|6538 (SLC6A11)|6542 (SLC7A2)|65…
		A	GO|GO.CC	GO:0031012	extracellular matrix	4.93306e-10	5.62172e-05	24	2 (A2M)|249 (ALPL)|954 (ENTPD2)|1404 (HAPLN1)|1463 (NCAN)|2239 (GPC4)|3371 (TNC)|4052 (LTBP1)|4323 (MMP14)|5654 (HTRA1)|5764 (PTN)|5803 (PTPRZ1)|7042 (TGFB2)|7057 (THBS1)|7060 (THBS4)|7078 (TIMP3)|8404 (SPARCL1)|9865 (TRIL)|10082 (GPC6)|26018 (LRIG1)|51435 (SCARA3)|143282 (FGFBP3)|151887 (CCDC80)|341640 (FREM2)
		A	GO|GO.BP	GO:0035295	tube development	1.24917e-09	0.000142355	36	183 (AGT)|1545 (CYP1B1)|1956 (EGFR)|2013 (EMP2)|2049 (EPHB3)|2064 (ERBB2)|2260 (FGFR1)|2735 (GLI1)|2736 (GLI2)|2737 (GLI3)|3082 (HGF)|3371 (TNC)|3373 (HYAL1)|4211 (MEIS1)|4323 (MMP14)|4488 (MSX2)|4854 (NOTCH3)|5080 (PAX6)|5764 (PTN)|5925 (RB1)|6662 (SOX9)|7042 (TGFB2)|7057 (THBS1)|7060 (THBS4)|7289 (TULP3)|9231 (DLG5)|10253 (SPRY2)|10451 (VAV3)|23657 (SLC7A11)|27031 (NPHP3)|27443 (CECR2)|55366 (L…
		A	GO|GO.BP	GO:0072359	circulatory system development	1.2514e-09	0.00014261	37	183 (AGT)|1363 (CPE)|1545 (CYP1B1)|1956 (EGFR)|2013 (EMP2)|2049 (EPHB3)|2064 (ERBB2)|2260 (FGFR1)|2697 (GJA1)|2735 (GLI1)|2736 (GLI2)|2737 (GLI3)|3082 (HGF)|3373 (HYAL1)|4052 (LTBP1)|4211 (MEIS1)|4323 (MMP14)|4488 (MSX2)|4853 (NOTCH2)|4854 (NOTCH3)|5080 (PAX6)|5465 (PPARA)|5764 (PTN)|5925 (RB1)|6662 (SOX9)|7042 (TGFB2)|7057 (THBS1)|7060 (THBS4)|7412 (VCAM1)|10253 (SPRY2)|10451 (VAV3)|27031 (NPHP3…
		A	GO|GO.BP	GO:0007166	cell surface receptor signaling pathway	1.39463e-09	0.000158932	66	136 (ADORA2B)|183 (AGT)|558 (AXL)|627 (BDNF)|658 (BMPR1B)|960 (CD44)|1363 (CPE)|1956 (EGFR)|2013 (EMP2)|2049 (EPHB3)|2064 (ERBB2)|2239 (GPC4)|2260 (FGFR1)|2735 (GLI1)|2736 (GLI2)|2737 (GLI3)|3082 (HGF)|3601 (IL15RA)|3679 (ITGA7)|4052 (LTBP1)|4163 (MCC)|4323 (MMP14)|4488 (MSX2)|4853 (NOTCH2)|4854 (NOTCH3)|4921 (DDR2)|5080 (PAX6)|5166 (PDK4)|5364 (PLXNB1)|5654 (HTRA1)|5764 (PTN)|5803 (PTPRZ1)|5925 …
		A	GO|GO.BP	GO:0022008	neurogenesis	1.51125e-09	0.000172222	44	183 (AGT)|558 (AXL)|627 (BDNF)|658 (BMPR1B)|1956 (EGFR)|2049 (EPHB3)|2064 (ERBB2)|2173 (FABP7)|2260 (FGFR1)|2560 (GABRB1)|2670 (GFAP)|2736 (GLI2)|2737 (GLI3)|3082 (HGF)|3371 (TNC)|3400 (ID4)|4211 (MEIS1)|4323 (MMP14)|4854 (NOTCH3)|5080 (PAX6)|5364 (PLXNB1)|5454 (POU3F2)|5764 (PTN)|5803 (PTPRZ1)|5925 (RB1)|6507 (SLC1A3)|6657 (SOX2)|6662 (SOX9)|7042 (TGFB2)|7289 (TULP3)|7412 (VCAM1)|7430 (EZR)|8660…
		A	GO|GO.BP	GO:0002009	morphogenesis of an epithelium	1.69874e-09	0.000193588	23	183 (AGT)|960 (CD44)|1956 (EGFR)|2239 (GPC4)|2260 (FGFR1)|2736 (GLI2)|2737 (GLI3)|3082 (HGF)|3371 (TNC)|3400 (ID4)|4323 (MMP14)|4488 (MSX2)|6662 (SOX9)|7042 (TGFB2)|7289 (TULP3)|9231 (DLG5)|10082 (GPC6)|10253 (SPRY2)|27031 (NPHP3)|55366 (LGR4)|84133 (ZNRF3)|341640 (FREM2)|388585 (HES5)
		A	GO|GO.BP	GO:0048583	regulation of response to stimulus	1.74509e-09	0.000198871	83	2 (A2M)|136 (ADORA2B)|183 (AGT)|477 (ATP1A2)|558 (AXL)|627 (BDNF)|658 (BMPR1B)|720 (C4A)|721 (C4B)|960 (CD44)|1545 (CYP1B1)|1956 (EGFR)|2013 (EMP2)|2049 (EPHB3)|2064 (ERBB2)|2173 (FABP7)|2239 (GPC4)|2260 (FGFR1)|2697 (GJA1)|2735 (GLI1)|2736 (GLI2)|2737 (GLI3)|3082 (HGF)|4052 (LTBP1)|4163 (MCC)|4323 (MMP14)|4488 (MSX2)|4828 (NMB)|4853 (NOTCH2)|4854 (NOTCH3)|4921 (DDR2)|5364 (PLXNB1)|5465 (PPARA)|5…
		A	GO|GO.BP	GO:0051094	positive regulation of developmental process	2.0494e-09	0.00023355	41	183 (AGT)|558 (AXL)|627 (BDNF)|658 (BMPR1B)|1545 (CYP1B1)|2049 (EPHB3)|2260 (FGFR1)|2670 (GFAP)|2735 (GLI1)|2736 (GLI2)|2737 (GLI3)|3082 (HGF)|3373 (HYAL1)|3400 (ID4)|4323 (MMP14)|4488 (MSX2)|4921 (DDR2)|5080 (PAX6)|5364 (PLXNB1)|5454 (POU3F2)|5764 (PTN)|5925 (RB1)|6657 (SOX2)|6662 (SOX9)|7042 (TGFB2)|7057 (THBS1)|7430 (EZR)|8997 (KALRN)|9231 (DLG5)|10125 (RASGRP1)|23499 (MACF1)|54857 (GDPD2)|553…
		A	GO|GO.BP	GO:0035239	tube morphogenesis	2.27599e-09	0.000259372	32	183 (AGT)|1545 (CYP1B1)|1956 (EGFR)|2013 (EMP2)|2049 (EPHB3)|2064 (ERBB2)|2260 (FGFR1)|2735 (GLI1)|2736 (GLI2)|2737 (GLI3)|3082 (HGF)|3371 (TNC)|3373 (HYAL1)|4211 (MEIS1)|4323 (MMP14)|4488 (MSX2)|4854 (NOTCH3)|5764 (PTN)|6662 (SOX9)|7042 (TGFB2)|7057 (THBS1)|7060 (THBS4)|7289 (TULP3)|9231 (DLG5)|10253 (SPRY2)|10451 (VAV3)|27031 (NPHP3)|55366 (LGR4)|64344 (HIF3A)|154796 (AMOT)|348093 (RBPMS2)|3885…
		A	GO|GO.BP	GO:0023052	signaling	3.11407e-09	0.00035488	110	2 (A2M)|136 (ADORA2B)|183 (AGT)|477 (ATP1A2)|482 (ATP1B2)|558 (AXL)|627 (BDNF)|658 (BMPR1B)|954 (ENTPD2)|960 (CD44)|1363 (CPE)|1545 (CYP1B1)|1607 (DGKB)|1837 (DTNA)|1956 (EGFR)|2013 (EMP2)|2049 (EPHB3)|2064 (ERBB2)|2239 (GPC4)|2260 (FGFR1)|2560 (GABRB1)|2565 (GABRG1)|2670 (GFAP)|2697 (GJA1)|2735 (GLI1)|2736 (GLI2)|2737 (GLI3)|2746 (GLUD1)|3082 (HGF)|3371 (TNC)|3601 (IL15RA)|3679 (ITGA7)|4052 (LTB…
		A	GO|GO.BP	GO:0030182	neuron differentiation	4.4275e-09	0.000504558	39	183 (AGT)|627 (BDNF)|658 (BMPR1B)|1956 (EGFR)|2049 (EPHB3)|2064 (ERBB2)|2260 (FGFR1)|2560 (GABRB1)|2670 (GFAP)|2736 (GLI2)|2737 (GLI3)|3082 (HGF)|3371 (TNC)|3400 (ID4)|4211 (MEIS1)|4854 (NOTCH3)|5080 (PAX6)|5364 (PLXNB1)|5454 (POU3F2)|5764 (PTN)|5803 (PTPRZ1)|5925 (RB1)|6507 (SLC1A3)|6657 (SOX2)|6662 (SOX9)|7042 (TGFB2)|7289 (TULP3)|7412 (VCAM1)|7430 (EZR)|8660 (IRS2)|8997 (KALRN)|9231 (DLG5)|230…
		A	GO|GO.BP	GO:0001503	ossification	4.44128e-09	0.000506128	20	249 (ALPL)|658 (BMPR1B)|1956 (EGFR)|2735 (GLI1)|2736 (GLI2)|2737 (GLI3)|3082 (HGF)|3371 (TNC)|3400 (ID4)|4323 (MMP14)|4488 (MSX2)|4921 (DDR2)|5364 (PLXNB1)|5764 (PTN)|6657 (SOX2)|6662 (SOX9)|7042 (TGFB2)|54857 (GDPD2)|55366 (LGR4)|202151 (RANBP3L)
		A	GO|GO.BP	GO:0051960	regulation of nervous system development	4.45185e-09	0.000507333	31	183 (AGT)|627 (BDNF)|2049 (EPHB3)|2239 (GPC4)|2260 (FGFR1)|2670 (GFAP)|2735 (GLI1)|2736 (GLI2)|2737 (GLI3)|3082 (HGF)|3400 (ID4)|4211 (MEIS1)|4854 (NOTCH3)|5080 (PAX6)|5364 (PLXNB1)|5454 (POU3F2)|5764 (PTN)|5803 (PTPRZ1)|5992 (RFX4)|6657 (SOX2)|6662 (SOX9)|7289 (TULP3)|8997 (KALRN)|9231 (DLG5)|23499 (MACF1)|27031 (NPHP3)|56963 (RGMA)|163175 (LGI4)|221074 (SLC39A12)|388585 (HES5)|654429 (LRTM2)
		A	GO|GO.BP	GO:0030323	respiratory tube development	4.74656e-09	0.000540918	14	1956 (EGFR)|2260 (FGFR1)|2735 (GLI1)|2736 (GLI2)|2737 (GLI3)|3371 (TNC)|4323 (MMP14)|5764 (PTN)|6662 (SOX9)|7289 (TULP3)|9231 (DLG5)|10253 (SPRY2)|23657 (SLC7A11)|27031 (NPHP3)
		A	GO|GO.BP	GO:0050896	response to stimulus	8.00545e-09	0.000912301	138	2 (A2M)|136 (ADORA2B)|183 (AGT)|205 (AK4)|249 (ALPL)|361 (AQP4)|366 (AQP9)|477 (ATP1A2)|558 (AXL)|627 (BDNF)|658 (BMPR1B)|720 (C4A)|721 (C4B)|954 (ENTPD2)|960 (CD44)|1363 (CPE)|1545 (CYP1B1)|1607 (DGKB)|1837 (DTNA)|1956 (EGFR)|2013 (EMP2)|2049 (EPHB3)|2064 (ERBB2)|2173 (FABP7)|2239 (GPC4)|2260 (FGFR1)|2560 (GABRB1)|2565 (GABRG1)|2670 (GFAP)|2697 (GJA1)|2735 (GLI1)|2736 (GLI2)|2737 (GLI3)|3082 (HG…
		A	GO|GO.BP	GO:0048729	tissue morphogenesis	8.48541e-09	0.000966997	25	183 (AGT)|960 (CD44)|1956 (EGFR)|2239 (GPC4)|2260 (FGFR1)|2736 (GLI2)|2737 (GLI3)|3082 (HGF)|3371 (TNC)|3400 (ID4)|4323 (MMP14)|4488 (MSX2)|6662 (SOX9)|7042 (TGFB2)|7289 (TULP3)|9231 (DLG5)|10082 (GPC6)|10253 (SPRY2)|27031 (NPHP3)|51435 (SCARA3)|55366 (LGR4)|84133 (ZNRF3)|286204 (CRB2)|341640 (FREM2)|388585 (HES5)
		A	GO|GO.BP	GO:0060322	head development	9.34566e-09	0.00106503	28	205 (AK4)|558 (AXL)|1956 (EGFR)|2049 (EPHB3)|2173 (FABP7)|2260 (FGFR1)|2735 (GLI1)|2736 (GLI2)|2737 (GLI3)|2746 (GLUD1)|3400 (ID4)|4129 (MAOB)|4323 (MMP14)|4854 (NOTCH3)|5013 (OTX1)|5080 (PAX6)|5454 (POU3F2)|5764 (PTN)|5992 (RFX4)|6538 (SLC6A11)|6657 (SOX2)|6662 (SOX9)|7289 (TULP3)|8660 (IRS2)|9231 (DLG5)|23657 (SLC7A11)|284612 (SYPL2)|388585 (HES5)
		A	GO|GO.BP	GO:0008283	cell proliferation	9.79868e-09	0.00111666	51	183 (AGT)|658 (BMPR1B)|1545 (CYP1B1)|1956 (EGFR)|2013 (EMP2)|2064 (ERBB2)|2173 (FABP7)|2260 (FGFR1)|2670 (GFAP)|2735 (GLI1)|2736 (GLI2)|2737 (GLI3)|3082 (HGF)|3371 (TNC)|3373 (HYAL1)|3400 (ID4)|3601 (IL15RA)|4163 (MCC)|4211 (MEIS1)|4323 (MMP14)|4488 (MSX2)|4828 (NMB)|4854 (NOTCH3)|4921 (DDR2)|5080 (PAX6)|5364 (PLXNB1)|5454 (POU3F2)|5654 (HTRA1)|5764 (PTN)|5803 (PTPRZ1)|5925 (RB1)|6657 (SOX2)|6662…
		A	GO|GO.BP	GO:0043062	extracellular structure organization	1.14829e-08	0.0013086	20	2 (A2M)|183 (AGT)|960 (CD44)|1404 (HAPLN1)|1463 (NCAN)|1545 (CYP1B1)|2670 (GFAP)|3371 (TNC)|3373 (HYAL1)|3679 (ITGA7)|3931 (LCAT)|4323 (MMP14)|4921 (DDR2)|5654 (HTRA1)|5925 (RB1)|6662 (SOX9)|7042 (TGFB2)|7057 (THBS1)|7412 (VCAM1)|151887 (CCDC80)
		A	GO|GO.BP	GO:0060541	respiratory system development	2.06193e-08	0.00234978	14	1956 (EGFR)|2260 (FGFR1)|2735 (GLI1)|2736 (GLI2)|2737 (GLI3)|3371 (TNC)|4323 (MMP14)|5764 (PTN)|6662 (SOX9)|7289 (TULP3)|9231 (DLG5)|10253 (SPRY2)|23657 (SLC7A11)|27031 (NPHP3)
		A	GO|GO.BP	GO:0048015	phosphatidylinositol-mediated signaling	2.18879e-08	0.00249434	13	183 (AGT)|1956 (EGFR)|2064 (ERBB2)|2260 (FGFR1)|3082 (HGF)|5364 (PLXNB1)|5783 (PTPN13)|6662 (SOX9)|7042 (TGFB2)|7430 (EZR)|8660 (IRS2)|10125 (RASGRP1)|23007 (PLCH1)
		A	GO|GO.BP	GO:0048699	generation of neurons	2.33528e-08	0.00266128	40	183 (AGT)|558 (AXL)|627 (BDNF)|658 (BMPR1B)|1956 (EGFR)|2049 (EPHB3)|2064 (ERBB2)|2260 (FGFR1)|2560 (GABRB1)|2670 (GFAP)|2736 (GLI2)|2737 (GLI3)|3082 (HGF)|3371 (TNC)|3400 (ID4)|4211 (MEIS1)|4854 (NOTCH3)|5080 (PAX6)|5364 (PLXNB1)|5454 (POU3F2)|5764 (PTN)|5803 (PTPRZ1)|5925 (RB1)|6507 (SLC1A3)|6657 (SOX2)|6662 (SOX9)|7042 (TGFB2)|7289 (TULP3)|7412 (VCAM1)|7430 (EZR)|8660 (IRS2)|8997 (KALRN)|9231 …
		A	GO|GO.BP	GO:0042063	gliogenesis	2.62509e-08	0.00299155	16	1956 (EGFR)|2064 (ERBB2)|2670 (GFAP)|2737 (GLI3)|3400 (ID4)|4323 (MMP14)|5080 (PAX6)|5454 (POU3F2)|5764 (PTN)|5803 (PTPRZ1)|6657 (SOX2)|6662 (SOX9)|7042 (TGFB2)|28999 (KLF15)|163175 (LGI4)|388585 (HES5)
		A	GO|GO.BP	GO:0048017	inositol lipid-mediated signaling	2.71876e-08	0.0030983	13	183 (AGT)|1956 (EGFR)|2064 (ERBB2)|2260 (FGFR1)|3082 (HGF)|5364 (PLXNB1)|5783 (PTPN13)|6662 (SOX9)|7042 (TGFB2)|7430 (EZR)|8660 (IRS2)|10125 (RASGRP1)|23007 (PLCH1)
		A	GO|GO.CC	GO:0005886	plasma membrane	2.84841e-08	0.00324605	96	136 (ADORA2B)|249 (ALPL)|361 (AQP4)|366 (AQP9)|477 (ATP1A2)|482 (ATP1B2)|558 (AXL)|658 (BMPR1B)|720 (C4A)|721 (C4B)|954 (ENTPD2)|960 (CD44)|1363 (CPE)|1607 (DGKB)|1821 (DRP2)|1837 (DTNA)|1956 (EGFR)|2013 (EMP2)|2049 (EPHB3)|2064 (ERBB2)|2239 (GPC4)|2260 (FGFR1)|2560 (GABRB1)|2565 (GABRG1)|2697 (GJA1)|3601 (IL15RA)|3679 (ITGA7)|3782 (KCNN3)|4163 (MCC)|4323 (MMP14)|4853 (NOTCH2)|4854 (NOTCH3)|4921 …
		A	GO|GO.BP	GO:0007165	signal transduction	2.88083e-08	0.00328299	102	2 (A2M)|136 (ADORA2B)|183 (AGT)|477 (ATP1A2)|558 (AXL)|627 (BDNF)|658 (BMPR1B)|954 (ENTPD2)|960 (CD44)|1363 (CPE)|1545 (CYP1B1)|1607 (DGKB)|1837 (DTNA)|1956 (EGFR)|2013 (EMP2)|2049 (EPHB3)|2064 (ERBB2)|2239 (GPC4)|2260 (FGFR1)|2560 (GABRB1)|2565 (GABRG1)|2697 (GJA1)|2735 (GLI1)|2736 (GLI2)|2737 (GLI3)|3082 (HGF)|3601 (IL15RA)|3679 (ITGA7)|4052 (LTBP1)|4163 (MCC)|4323 (MMP14)|4488 (MSX2)|4828 (NMB…
		A	GO|GO.BP	GO:0030324	lung development	3.13368e-08	0.00357114	13	1956 (EGFR)|2260 (FGFR1)|2735 (GLI1)|2736 (GLI2)|2737 (GLI3)|3371 (TNC)|4323 (MMP14)|5764 (PTN)|6662 (SOX9)|9231 (DLG5)|10253 (SPRY2)|23657 (SLC7A11)|27031 (NPHP3)
		A	GO|GO.BP	GO:0009611	response to wounding	3.22175e-08	0.00367151	25	2 (A2M)|558 (AXL)|954 (ENTPD2)|960 (CD44)|1607 (DGKB)|1956 (EGFR)|2064 (ERBB2)|2670 (GFAP)|2735 (GLI1)|2737 (GLI3)|3371 (TNC)|4488 (MSX2)|5080 (PAX6)|5465 (PPARA)|6507 (SLC1A3)|6657 (SOX2)|7042 (TGFB2)|7057 (THBS1)|9060 (PAPSS2)|9127 (P2RX6)|10451 (VAV3)|23499 (MACF1)|23657 (SLC7A11)|56963 (RGMA)|59352 (LGR6)
		A	GO|GO.BP	GO:0051716	cellular response to stimulus	3.28201e-08	0.00374018	118	2 (A2M)|136 (ADORA2B)|183 (AGT)|249 (ALPL)|361 (AQP4)|366 (AQP9)|477 (ATP1A2)|558 (AXL)|627 (BDNF)|658 (BMPR1B)|954 (ENTPD2)|960 (CD44)|1363 (CPE)|1545 (CYP1B1)|1607 (DGKB)|1837 (DTNA)|1956 (EGFR)|2013 (EMP2)|2049 (EPHB3)|2064 (ERBB2)|2239 (GPC4)|2260 (FGFR1)|2560 (GABRB1)|2565 (GABRG1)|2670 (GFAP)|2697 (GJA1)|2735 (GLI1)|2736 (GLI2)|2737 (GLI3)|3082 (HGF)|3371 (TNC)|3373 (HYAL1)|3601 (IL15RA)|36…
		A	GO|GO.BP	GO:0030198	extracellular matrix organization	3.5493e-08	0.00404478	18	2 (A2M)|183 (AGT)|960 (CD44)|1404 (HAPLN1)|1463 (NCAN)|1545 (CYP1B1)|2670 (GFAP)|3371 (TNC)|3679 (ITGA7)|4323 (MMP14)|4921 (DDR2)|5654 (HTRA1)|5925 (RB1)|6662 (SOX9)|7042 (TGFB2)|7057 (THBS1)|7412 (VCAM1)|151887 (CCDC80)
		A	GO|GO.BP	GO:0010648	negative regulation of cell communication	3.60514e-08	0.00410842	38	183 (AGT)|558 (AXL)|960 (CD44)|1956 (EGFR)|2049 (EPHB3)|2064 (ERBB2)|2260 (FGFR1)|2735 (GLI1)|2737 (GLI3)|3082 (HGF)|4052 (LTBP1)|4163 (MCC)|4323 (MMP14)|4828 (NMB)|4854 (NOTCH3)|4921 (DDR2)|5654 (HTRA1)|5925 (RB1)|5992 (RFX4)|6000 (RGS7)|6657 (SOX2)|6662 (SOX9)|7042 (TGFB2)|7057 (THBS1)|7078 (TIMP3)|7289 (TULP3)|7430 (EZR)|8997 (KALRN)|9231 (DLG5)|10010 (TANK)|10253 (SPRY2)|23286 (WWC1)|27031 (N…
		A	GO|GO.CC	GO:0071944	cell periphery	3.66331e-08	0.00417471	97	136 (ADORA2B)|249 (ALPL)|361 (AQP4)|366 (AQP9)|477 (ATP1A2)|482 (ATP1B2)|558 (AXL)|658 (BMPR1B)|720 (C4A)|721 (C4B)|954 (ENTPD2)|960 (CD44)|1363 (CPE)|1607 (DGKB)|1821 (DRP2)|1837 (DTNA)|1956 (EGFR)|2013 (EMP2)|2049 (EPHB3)|2064 (ERBB2)|2173 (FABP7)|2239 (GPC4)|2260 (FGFR1)|2560 (GABRB1)|2565 (GABRG1)|2697 (GJA1)|3601 (IL15RA)|3679 (ITGA7)|3782 (KCNN3)|4163 (MCC)|4323 (MMP14)|4853 (NOTCH2)|4854 (…
		A	GO|GO.BP	GO:0023057	negative regulation of signaling	3.8929e-08	0.00443635	38	183 (AGT)|558 (AXL)|960 (CD44)|1956 (EGFR)|2049 (EPHB3)|2064 (ERBB2)|2260 (FGFR1)|2735 (GLI1)|2737 (GLI3)|3082 (HGF)|4052 (LTBP1)|4163 (MCC)|4323 (MMP14)|4828 (NMB)|4854 (NOTCH3)|4921 (DDR2)|5654 (HTRA1)|5925 (RB1)|5992 (RFX4)|6000 (RGS7)|6657 (SOX2)|6662 (SOX9)|7042 (TGFB2)|7057 (THBS1)|7078 (TIMP3)|7289 (TULP3)|7430 (EZR)|8997 (KALRN)|9231 (DLG5)|10010 (TANK)|10253 (SPRY2)|23286 (WWC1)|27031 (N…
		A	GO|GO.BP	GO:0048732	gland development	4.09281e-08	0.00466416	20	205 (AK4)|1956 (EGFR)|2049 (EPHB3)|2260 (FGFR1)|2735 (GLI1)|2736 (GLI2)|2737 (GLI3)|3082 (HGF)|3371 (TNC)|3400 (ID4)|4488 (MSX2)|5080 (PAX6)|5454 (POU3F2)|5764 (PTN)|6657 (SOX2)|6662 (SOX9)|7042 (TGFB2)|8660 (IRS2)|8997 (KALRN)|27031 (NPHP3)
		A	GO|GO.BP	GO:0007420	brain development	4.41336e-08	0.00502946	26	205 (AK4)|558 (AXL)|1956 (EGFR)|2049 (EPHB3)|2173 (FABP7)|2260 (FGFR1)|2735 (GLI1)|2736 (GLI2)|2737 (GLI3)|2746 (GLUD1)|3400 (ID4)|4129 (MAOB)|4854 (NOTCH3)|5013 (OTX1)|5080 (PAX6)|5454 (POU3F2)|5764 (PTN)|5992 (RFX4)|6538 (SLC6A11)|6657 (SOX2)|7289 (TULP3)|8660 (IRS2)|9231 (DLG5)|23657 (SLC7A11)|284612 (SYPL2)|388585 (HES5)
		A	GO|GO.BP	GO:0042127	regulation of cell proliferation	4.42739e-08	0.00504545	43	183 (AGT)|658 (BMPR1B)|1545 (CYP1B1)|1956 (EGFR)|2013 (EMP2)|2064 (ERBB2)|2173 (FABP7)|2260 (FGFR1)|2670 (GFAP)|2735 (GLI1)|2736 (GLI2)|2737 (GLI3)|3371 (TNC)|3373 (HYAL1)|3400 (ID4)|4163 (MCC)|4211 (MEIS1)|4488 (MSX2)|4828 (NMB)|4854 (NOTCH3)|4921 (DDR2)|5080 (PAX6)|5364 (PLXNB1)|5454 (POU3F2)|5654 (HTRA1)|5764 (PTN)|5803 (PTPRZ1)|5925 (RB1)|6657 (SOX2)|6662 (SOX9)|7042 (TGFB2)|7057 (THBS1)|7060…
		A	GO|GO.BP	GO:0009968	negative regulation of signal transduction	4.65972e-08	0.00531021	36	183 (AGT)|558 (AXL)|960 (CD44)|1956 (EGFR)|2049 (EPHB3)|2064 (ERBB2)|2260 (FGFR1)|2735 (GLI1)|2737 (GLI3)|3082 (HGF)|4052 (LTBP1)|4163 (MCC)|4323 (MMP14)|4854 (NOTCH3)|4921 (DDR2)|5654 (HTRA1)|5925 (RB1)|5992 (RFX4)|6000 (RGS7)|6657 (SOX2)|6662 (SOX9)|7042 (TGFB2)|7057 (THBS1)|7078 (TIMP3)|7289 (TULP3)|7430 (EZR)|9231 (DLG5)|10010 (TANK)|10253 (SPRY2)|23286 (WWC1)|27031 (NPHP3)|55366 (LGR4)|63976…
		A	GO|GO.BP	GO:0030030	cell projection organization	4.70621e-08	0.0053632	40	183 (AGT)|627 (BDNF)|658 (BMPR1B)|960 (CD44)|1956 (EGFR)|2013 (EMP2)|2049 (EPHB3)|2064 (ERBB2)|2260 (FGFR1)|2670 (GFAP)|2736 (GLI2)|2737 (GLI3)|3082 (HGF)|3371 (TNC)|5080 (PAX6)|5364 (PLXNB1)|5454 (POU3F2)|5764 (PTN)|5803 (PTPRZ1)|5925 (RB1)|5992 (RFX4)|7430 (EZR)|7802 (DNALI1)|8660 (IRS2)|8997 (KALRN)|9231 (DLG5)|10253 (SPRY2)|10451 (VAV3)|23022 (PALLD)|23499 (MACF1)|26084 (ARHGEF26)|27031 (NPHP…
		A	GO|GO.CC	GO:0042995	cell projection	4.74163e-08	0.00540356	50	477 (ATP1A2)|627 (BDNF)|658 (BMPR1B)|720 (C4A)|721 (C4B)|960 (CD44)|1821 (DRP2)|1837 (DTNA)|2049 (EPHB3)|2173 (FABP7)|2560 (GABRB1)|2565 (GABRG1)|2670 (GFAP)|2735 (GLI1)|2736 (GLI2)|2737 (GLI3)|3782 (KCNN3)|4163 (MCC)|4828 (NMB)|5783 (PTPN13)|6507 (SLC1A3)|6509 (SLC1A4)|6538 (SLC6A11)|7042 (TGFB2)|7289 (TULP3)|7412 (VCAM1)|7430 (EZR)|7802 (DNALI1)|9127 (P2RX6)|9231 (DLG5)|10253 (SPRY2)|23022 (PAL…
		A	GO|GO.BP	GO:0048598	embryonic morphogenesis	5.44758e-08	0.00620806	23	2260 (FGFR1)|2735 (GLI1)|2736 (GLI2)|2737 (GLI3)|3373 (HYAL1)|3679 (ITGA7)|4323 (MMP14)|4488 (MSX2)|5013 (OTX1)|5080 (PAX6)|6657 (SOX2)|6662 (SOX9)|7042 (TGFB2)|7289 (TULP3)|10253 (SPRY2)|10804 (GJB6)|26018 (LRIG1)|27031 (NPHP3)|154796 (AMOT)|286204 (CRB2)|341640 (FREM2)|348093 (RBPMS2)|388585 (HES5)
		A	GO|GO.BP	GO:0040007	growth	5.49646e-08	0.00626376	31	183 (AGT)|627 (BDNF)|658 (BMPR1B)|1956 (EGFR)|2064 (ERBB2)|2260 (FGFR1)|2697 (GJA1)|2735 (GLI1)|2736 (GLI2)|2737 (GLI3)|3371 (TNC)|3373 (HYAL1)|4211 (MEIS1)|4323 (MMP14)|4488 (MSX2)|4853 (NOTCH2)|4921 (DDR2)|5454 (POU3F2)|5465 (PPARA)|5654 (HTRA1)|5925 (RB1)|6657 (SOX2)|6662 (SOX9)|7042 (TGFB2)|7430 (EZR)|10253 (SPRY2)|23286 (WWC1)|23499 (MACF1)|51435 (SCARA3)|57678 (GPAM)|59352 (LGR6)
		A	GO|GO.BP	GO:0070848	response to growth factor	5.65599e-08	0.00644557	26	183 (AGT)|627 (BDNF)|658 (BMPR1B)|960 (CD44)|1956 (EGFR)|2064 (ERBB2)|2260 (FGFR1)|3082 (HGF)|3371 (TNC)|3373 (HYAL1)|4052 (LTBP1)|4488 (MSX2)|5654 (HTRA1)|5764 (PTN)|6657 (SOX2)|6662 (SOX9)|7042 (TGFB2)|7057 (THBS1)|7412 (VCAM1)|10253 (SPRY2)|56963 (RGMA)|63976 (PRDM16)|143282 (FGFBP3)|286204 (CRB2)|348093 (RBPMS2)|388585 (HES5)
		A	GO|GO.BP	GO:0007423	sensory organ development	5.69354e-08	0.00648835	22	658 (BMPR1B)|1545 (CYP1B1)|1956 (EGFR)|2260 (FGFR1)|2736 (GLI2)|2737 (GLI3)|4211 (MEIS1)|5013 (OTX1)|5080 (PAX6)|5764 (PTN)|6657 (SOX2)|6662 (SOX9)|7042 (TGFB2)|7289 (TULP3)|10253 (SPRY2)|10804 (GJB6)|22989 (MYH15)|23657 (SLC7A11)|26018 (LRIG1)|63976 (PRDM16)|341640 (FREM2)|388585 (HES5)
		A	GO|GO.BP	GO:0048562	embryonic organ morphogenesis	6.52189e-08	0.00743234	16	2260 (FGFR1)|2735 (GLI1)|2736 (GLI2)|2737 (GLI3)|3373 (HYAL1)|4323 (MMP14)|5013 (OTX1)|5080 (PAX6)|6662 (SOX9)|7289 (TULP3)|10253 (SPRY2)|10804 (GJB6)|26018 (LRIG1)|27031 (NPHP3)|286204 (CRB2)|348093 (RBPMS2)
		A	GO|GO.BP	GO:0010647	positive regulation of cell communication	6.9508e-08	0.00792113	44	136 (ADORA2B)|183 (AGT)|558 (AXL)|627 (BDNF)|658 (BMPR1B)|960 (CD44)|1545 (CYP1B1)|1956 (EGFR)|2013 (EMP2)|2049 (EPHB3)|2064 (ERBB2)|2260 (FGFR1)|2670 (GFAP)|2697 (GJA1)|2735 (GLI1)|2746 (GLUD1)|3082 (HGF)|4488 (MSX2)|4828 (NMB)|4853 (NOTCH2)|4921 (DDR2)|5364 (PLXNB1)|5764 (PTN)|6507 (SLC1A3)|6574 (SLC20A1)|6657 (SOX2)|6662 (SOX9)|7042 (TGFB2)|7057 (THBS1)|7078 (TIMP3)|8660 (IRS2)|9231 (DLG5)|101…
		A	GO|GO.BP	GO:0001649	osteoblast differentiation	7.08126e-08	0.0080698	14	249 (ALPL)|658 (BMPR1B)|2735 (GLI1)|2736 (GLI2)|2737 (GLI3)|3082 (HGF)|3371 (TNC)|3400 (ID4)|4488 (MSX2)|4921 (DDR2)|6657 (SOX2)|54857 (GDPD2)|55366 (LGR4)|202151 (RANBP3L)
		A	GO|GO.BP	GO:0007267	cell-cell signaling	7.41654e-08	0.00845188	41	136 (ADORA2B)|183 (AGT)|477 (ATP1A2)|558 (AXL)|627 (BDNF)|1363 (CPE)|1607 (DGKB)|1837 (DTNA)|1956 (EGFR)|2239 (GPC4)|2260 (FGFR1)|2560 (GABRB1)|2565 (GABRG1)|2670 (GFAP)|2697 (GJA1)|2735 (GLI1)|2736 (GLI2)|2737 (GLI3)|2746 (GLUD1)|3082 (HGF)|3371 (TNC)|4163 (MCC)|4828 (NMB)|5764 (PTN)|6507 (SLC1A3)|6509 (SLC1A4)|6657 (SOX2)|6662 (SOX9)|7042 (TGFB2)|8660 (IRS2)|8997 (KALRN)|9127 (P2RX6)|9627 (SNCA…
		A	GO|GO.BP	GO:0120036	plasma membrane bounded cell projection organization	7.47303e-08	0.00851626	39	183 (AGT)|627 (BDNF)|658 (BMPR1B)|960 (CD44)|1956 (EGFR)|2013 (EMP2)|2049 (EPHB3)|2064 (ERBB2)|2260 (FGFR1)|2670 (GFAP)|2736 (GLI2)|2737 (GLI3)|3082 (HGF)|3371 (TNC)|5080 (PAX6)|5364 (PLXNB1)|5454 (POU3F2)|5764 (PTN)|5803 (PTPRZ1)|5925 (RB1)|5992 (RFX4)|7430 (EZR)|7802 (DNALI1)|8660 (IRS2)|8997 (KALRN)|9231 (DLG5)|10451 (VAV3)|23022 (PALLD)|23499 (MACF1)|26084 (ARHGEF26)|27031 (NPHP3)|29070 (CCDC…
		A	GO|GO.BP	GO:0023056	positive regulation of signaling	7.78597e-08	0.00887289	44	136 (ADORA2B)|183 (AGT)|558 (AXL)|627 (BDNF)|658 (BMPR1B)|960 (CD44)|1545 (CYP1B1)|1956 (EGFR)|2013 (EMP2)|2049 (EPHB3)|2064 (ERBB2)|2260 (FGFR1)|2670 (GFAP)|2697 (GJA1)|2735 (GLI1)|2746 (GLUD1)|3082 (HGF)|4488 (MSX2)|4828 (NMB)|4853 (NOTCH2)|4921 (DDR2)|5364 (PLXNB1)|5764 (PTN)|6507 (SLC1A3)|6574 (SLC20A1)|6657 (SOX2)|6662 (SOX9)|7042 (TGFB2)|7057 (THBS1)|7078 (TIMP3)|8660 (IRS2)|9231 (DLG5)|101…
		A	GO|GO.CC	GO:0062023	collagen-containing extracellular matrix	9.97828e-08	0.0113712	17	2 (A2M)|954 (ENTPD2)|1404 (HAPLN1)|2239 (GPC4)|3371 (TNC)|4052 (LTBP1)|5654 (HTRA1)|5764 (PTN)|5803 (PTPRZ1)|7042 (TGFB2)|7057 (THBS1)|7060 (THBS4)|7078 (TIMP3)|8404 (SPARCL1)|10082 (GPC6)|151887 (CCDC80)|341640 (FREM2)
		A	GO|GO.BP	GO:0030900	forebrain development	1.05244e-07	0.0119936	18	558 (AXL)|1956 (EGFR)|2049 (EPHB3)|2173 (FABP7)|2260 (FGFR1)|2735 (GLI1)|2736 (GLI2)|2737 (GLI3)|3400 (ID4)|4854 (NOTCH3)|5013 (OTX1)|5080 (PAX6)|5454 (POU3F2)|5764 (PTN)|5992 (RFX4)|6657 (SOX2)|23657 (SLC7A11)|388585 (HES5)
		A	GO|GO.BP	GO:0048666	neuron development	1.076e-07	0.0122621	32	183 (AGT)|627 (BDNF)|658 (BMPR1B)|1956 (EGFR)|2049 (EPHB3)|2064 (ERBB2)|2260 (FGFR1)|2560 (GABRB1)|2670 (GFAP)|2736 (GLI2)|2737 (GLI3)|3082 (HGF)|3371 (TNC)|5080 (PAX6)|5364 (PLXNB1)|5454 (POU3F2)|5764 (PTN)|5803 (PTPRZ1)|5925 (RB1)|6507 (SLC1A3)|7042 (TGFB2)|7430 (EZR)|8660 (IRS2)|8997 (KALRN)|9231 (DLG5)|23022 (PALLD)|23499 (MACF1)|56963 (RGMA)|91653 (BOC)|163175 (LGI4)|221074 (SLC39A12)|388585…
		A	GO|GO.BP	GO:0051093	negative regulation of developmental process	1.12188e-07	0.0127849	31	183 (AGT)|627 (BDNF)|1956 (EGFR)|2064 (ERBB2)|2670 (GFAP)|2736 (GLI2)|2737 (GLI3)|3400 (ID4)|4211 (MEIS1)|4488 (MSX2)|4854 (NOTCH3)|5080 (PAX6)|5465 (PPARA)|5764 (PTN)|5925 (RB1)|5992 (RFX4)|6657 (SOX2)|6662 (SOX9)|7042 (TGFB2)|7057 (THBS1)|7060 (THBS4)|7274 (TTPA)|7289 (TULP3)|10253 (SPRY2)|23286 (WWC1)|27031 (NPHP3)|56963 (RGMA)|154796 (AMOT)|202151 (RANBP3L)|348093 (RBPMS2)|388585 (HES5)
		A	GO|GO.BP	GO:0050673	epithelial cell proliferation	1.20969e-07	0.0137857	19	1956 (EGFR)|2064 (ERBB2)|2173 (FABP7)|2260 (FGFR1)|2735 (GLI1)|3373 (HYAL1)|4163 (MCC)|4323 (MMP14)|5080 (PAX6)|5654 (HTRA1)|5764 (PTN)|5925 (RB1)|6657 (SOX2)|6662 (SOX9)|7042 (TGFB2)|7057 (THBS1)|7060 (THBS4)|55366 (LGR4)|388585 (HES5)
		A	GO|GO.BP	GO:0048585	negative regulation of response to stimulus	1.21372e-07	0.0138315	41	2 (A2M)|183 (AGT)|558 (AXL)|960 (CD44)|1956 (EGFR)|2049 (EPHB3)|2064 (ERBB2)|2173 (FABP7)|2260 (FGFR1)|2735 (GLI1)|2737 (GLI3)|3082 (HGF)|4052 (LTBP1)|4163 (MCC)|4323 (MMP14)|4854 (NOTCH3)|4921 (DDR2)|5465 (PPARA)|5654 (HTRA1)|5925 (RB1)|5992 (RFX4)|6000 (RGS7)|6657 (SOX2)|6662 (SOX9)|7042 (TGFB2)|7057 (THBS1)|7078 (TIMP3)|7289 (TULP3)|7430 (EZR)|9231 (DLG5)|10010 (TANK)|10253 (SPRY2)|23286 (WWC1…
		A	GO|GO.BP	GO:0007224	smoothened signaling pathway	1.29181e-07	0.0147214	11	2735 (GLI1)|2736 (GLI2)|2737 (GLI3)|5080 (PAX6)|5925 (RB1)|5992 (RFX4)|7289 (TULP3)|9231 (DLG5)|91653 (BOC)|132884 (EVC2)|388585 (HES5)
		A	GO|GO.BP	GO:0048568	embryonic organ development	1.30218e-07	0.0148396	19	1956 (EGFR)|2260 (FGFR1)|2735 (GLI1)|2736 (GLI2)|2737 (GLI3)|3373 (HYAL1)|4323 (MMP14)|5013 (OTX1)|5080 (PAX6)|6662 (SOX9)|7042 (TGFB2)|7274 (TTPA)|7289 (TULP3)|10253 (SPRY2)|10804 (GJB6)|26018 (LRIG1)|27031 (NPHP3)|286204 (CRB2)|348093 (RBPMS2)
		A	GO|GO.BP	GO:0006928	movement of cell or subcellular component	1.36593e-07	0.0155661	49	183 (AGT)|477 (ATP1A2)|482 (ATP1B2)|558 (AXL)|627 (BDNF)|658 (BMPR1B)|960 (CD44)|1545 (CYP1B1)|1956 (EGFR)|2013 (EMP2)|2049 (EPHB3)|2064 (ERBB2)|2260 (FGFR1)|2697 (GJA1)|2736 (GLI2)|2737 (GLI3)|3082 (HGF)|3373 (HYAL1)|4163 (MCC)|4323 (MMP14)|4488 (MSX2)|4921 (DDR2)|5080 (PAX6)|5364 (PLXNB1)|5454 (POU3F2)|5764 (PTN)|6662 (SOX9)|7042 (TGFB2)|7057 (THBS1)|7060 (THBS4)|7412 (VCAM1)|7430 (EZR)|8660 (I…
		A	GO|GO.BP	GO:0051241	negative regulation of multicellular organismal process	1.48618e-07	0.0169365	35	136 (ADORA2B)|183 (AGT)|477 (ATP1A2)|558 (AXL)|1956 (EGFR)|2064 (ERBB2)|2260 (FGFR1)|2670 (GFAP)|2736 (GLI2)|2737 (GLI3)|3082 (HGF)|3400 (ID4)|4163 (MCC)|4211 (MEIS1)|4488 (MSX2)|4854 (NOTCH3)|5080 (PAX6)|5465 (PPARA)|5764 (PTN)|5925 (RB1)|5992 (RFX4)|6657 (SOX2)|6662 (SOX9)|7042 (TGFB2)|7057 (THBS1)|7060 (THBS4)|7289 (TULP3)|7430 (EZR)|10253 (SPRY2)|23286 (WWC1)|55366 (LGR4)|56963 (RGMA)|154796 …
		A	GO|GO.CC	GO:0031226	intrinsic component of plasma membrane	1.50701e-07	0.0171738	42	136 (ADORA2B)|366 (AQP9)|477 (ATP1A2)|482 (ATP1B2)|558 (AXL)|658 (BMPR1B)|960 (CD44)|1956 (EGFR)|2049 (EPHB3)|2064 (ERBB2)|2239 (GPC4)|2260 (FGFR1)|2560 (GABRB1)|2565 (GABRG1)|2697 (GJA1)|3679 (ITGA7)|4323 (MMP14)|4853 (NOTCH2)|4921 (DDR2)|5364 (PLXNB1)|5803 (PTPRZ1)|6507 (SLC1A3)|6509 (SLC1A4)|6517 (SLC2A4)|6538 (SLC6A11)|6542 (SLC7A2)|6563 (SLC14A1)|6565 (SLC15A2)|6574 (SLC20A1)|7412 (VCAM1)|86…
		A	GO|GO.BP	GO:0007507	heart development	1.5692e-07	0.0178826	22	183 (AGT)|1363 (CPE)|1956 (EGFR)|2064 (ERBB2)|2260 (FGFR1)|2697 (GJA1)|2735 (GLI1)|2736 (GLI2)|2737 (GLI3)|4052 (LTBP1)|4211 (MEIS1)|4488 (MSX2)|4853 (NOTCH2)|5465 (PPARA)|5764 (PTN)|5925 (RB1)|6662 (SOX9)|7042 (TGFB2)|7412 (VCAM1)|27031 (NPHP3)|284086 (NEK8)|341640 (FREM2)
		A	GO|GO.BP	GO:0010001	glial cell differentiation	1.58983e-07	0.0181177	13	1956 (EGFR)|2064 (ERBB2)|2670 (GFAP)|2737 (GLI3)|3400 (ID4)|5080 (PAX6)|5454 (POU3F2)|5803 (PTPRZ1)|6657 (SOX2)|6662 (SOX9)|28999 (KLF15)|163175 (LGI4)|388585 (HES5)
		A	GO|GO.BP	GO:0022603	regulation of anatomical structure morphogenesis	1.88655e-07	0.0214991	32	183 (AGT)|627 (BDNF)|960 (CD44)|1545 (CYP1B1)|2013 (EMP2)|2049 (EPHB3)|2064 (ERBB2)|2239 (GPC4)|2260 (FGFR1)|2735 (GLI1)|3082 (HGF)|3373 (HYAL1)|3679 (ITGA7)|5364 (PLXNB1)|5454 (POU3F2)|5764 (PTN)|6662 (SOX9)|7042 (TGFB2)|7057 (THBS1)|7060 (THBS4)|7430 (EZR)|8997 (KALRN)|10082 (GPC6)|10253 (SPRY2)|23499 (MACF1)|27031 (NPHP3)|55366 (LGR4)|80821 (DDHD1)|84133 (ZNRF3)|121512 (FGD4)|154796 (AMOT)|286…
		A	GO|GO.BP	GO:0030155	regulation of cell adhesion	1.8902e-07	0.0215407	24	960 (CD44)|1545 (CYP1B1)|2013 (EMP2)|2049 (EPHB3)|2064 (ERBB2)|2736 (GLI2)|2737 (GLI3)|3371 (TNC)|3373 (HYAL1)|4323 (MMP14)|5364 (PLXNB1)|5465 (PPARA)|5764 (PTN)|6657 (SOX2)|6662 (SOX9)|7042 (TGFB2)|7057 (THBS1)|7412 (VCAM1)|9231 (DLG5)|10125 (RASGRP1)|10451 (VAV3)|23499 (MACF1)|57678 (GPAM)|151887 (CCDC80)
		A	GO|GO.BP	GO:0040011	locomotion	2.28962e-07	0.0260925	45	183 (AGT)|477 (ATP1A2)|482 (ATP1B2)|558 (AXL)|627 (BDNF)|658 (BMPR1B)|960 (CD44)|1545 (CYP1B1)|1956 (EGFR)|2013 (EMP2)|2049 (EPHB3)|2064 (ERBB2)|2260 (FGFR1)|2736 (GLI2)|2737 (GLI3)|3082 (HGF)|3373 (HYAL1)|4163 (MCC)|4323 (MMP14)|4488 (MSX2)|4921 (DDR2)|5080 (PAX6)|5364 (PLXNB1)|5454 (POU3F2)|5764 (PTN)|6662 (SOX9)|7042 (TGFB2)|7057 (THBS1)|7060 (THBS4)|7412 (VCAM1)|7430 (EZR)|8660 (IRS2)|9231 (D…
		A	GO|GO.BP	GO:0060429	epithelium development	2.43328e-07	0.0277297	34	183 (AGT)|960 (CD44)|1956 (EGFR)|2239 (GPC4)|2260 (FGFR1)|2735 (GLI1)|2736 (GLI2)|2737 (GLI3)|3082 (HGF)|3371 (TNC)|3400 (ID4)|4323 (MMP14)|4488 (MSX2)|5080 (PAX6)|5764 (PTN)|6662 (SOX9)|7042 (TGFB2)|7289 (TULP3)|7430 (EZR)|9231 (DLG5)|10082 (GPC6)|10253 (SPRY2)|23022 (PALLD)|23657 (SLC7A11)|26084 (ARHGEF26)|27031 (NPHP3)|27443 (CECR2)|28999 (KLF15)|55366 (LGR4)|56898 (BDH2)|84133 (ZNRF3)|286204 …
		A	GO|GO.BP	GO:0071310	cellular response to organic substance	2.53469e-07	0.0288853	55	183 (AGT)|249 (ALPL)|361 (AQP4)|366 (AQP9)|477 (ATP1A2)|558 (AXL)|627 (BDNF)|658 (BMPR1B)|960 (CD44)|1545 (CYP1B1)|1956 (EGFR)|2064 (ERBB2)|2260 (FGFR1)|2560 (GABRB1)|2736 (GLI2)|3082 (HGF)|3371 (TNC)|3373 (HYAL1)|3601 (IL15RA)|4052 (LTBP1)|4488 (MSX2)|5080 (PAX6)|5166 (PDK4)|5454 (POU3F2)|5465 (PPARA)|5596 (MAPK4)|5654 (HTRA1)|5764 (PTN)|5783 (PTPN13)|5803 (PTPRZ1)|5925 (RB1)|6517 (SLC2A4)|6657 …
		A	GO|GO.CC	GO:0098590	plasma membrane region	2.65971e-07	0.0303101	33	361 (AQP4)|366 (AQP9)|477 (ATP1A2)|482 (ATP1B2)|960 (CD44)|1363 (CPE)|1821 (DRP2)|1956 (EGFR)|2013 (EMP2)|2064 (ERBB2)|2239 (GPC4)|2560 (GABRB1)|2565 (GABRG1)|4921 (DDR2)|6538 (SLC6A11)|6563 (SLC14A1)|7430 (EZR)|8671 (SLC4A4)|9127 (P2RX6)|9231 (DLG5)|9627 (SNCAIP)|10253 (SPRY2)|10804 (GJB6)|23209 (MLC1)|23286 (WWC1)|23499 (MACF1)|23657 (SLC7A11)|79870 (BAALC)|79901 (CYBRD1)|117583 (PARD3B)|132884…
		A	GO|GO.BP	GO:0045664	regulation of neuron differentiation	2.84158e-07	0.0323827	23	183 (AGT)|627 (BDNF)|2049 (EPHB3)|2260 (FGFR1)|2670 (GFAP)|2736 (GLI2)|2737 (GLI3)|3082 (HGF)|3400 (ID4)|4211 (MEIS1)|4854 (NOTCH3)|5080 (PAX6)|5364 (PLXNB1)|5454 (POU3F2)|5764 (PTN)|6657 (SOX2)|6662 (SOX9)|8997 (KALRN)|9231 (DLG5)|23499 (MACF1)|56963 (RGMA)|221074 (SLC39A12)|388585 (HES5)
		A	GO|GO.CC	GO:0120025	plasma membrane bounded cell projection	3.18547e-07	0.0363016	47	477 (ATP1A2)|627 (BDNF)|658 (BMPR1B)|720 (C4A)|721 (C4B)|960 (CD44)|1821 (DRP2)|1837 (DTNA)|2049 (EPHB3)|2560 (GABRB1)|2565 (GABRG1)|2670 (GFAP)|2735 (GLI1)|2736 (GLI2)|2737 (GLI3)|3782 (KCNN3)|4163 (MCC)|4828 (NMB)|5783 (PTPN13)|6507 (SLC1A3)|6509 (SLC1A4)|6538 (SLC6A11)|7042 (TGFB2)|7289 (TULP3)|7412 (VCAM1)|7430 (EZR)|7802 (DNALI1)|9127 (P2RX6)|9231 (DLG5)|10253 (SPRY2)|23022 (PALLD)|23286 (WW…
		A	GO|GO.BP	GO:0008284	positive regulation of cell proliferation	3.25983e-07	0.037149	29	183 (AGT)|1956 (EGFR)|2013 (EMP2)|2064 (ERBB2)|2260 (FGFR1)|2670 (GFAP)|2735 (GLI1)|2736 (GLI2)|2737 (GLI3)|3371 (TNC)|3373 (HYAL1)|3400 (ID4)|4828 (NMB)|4854 (NOTCH3)|4921 (DDR2)|5080 (PAX6)|5454 (POU3F2)|5654 (HTRA1)|5764 (PTN)|6662 (SOX9)|7042 (TGFB2)|7057 (THBS1)|7060 (THBS4)|7412 (VCAM1)|8660 (IRS2)|10451 (VAV3)|57678 (GPAM)|348093 (RBPMS2)|388585 (HES5)
		A	GO|GO.CC	GO:0005887	integral component of plasma membrane	3.34671e-07	0.0381391	40	136 (ADORA2B)|366 (AQP9)|477 (ATP1A2)|482 (ATP1B2)|558 (AXL)|658 (BMPR1B)|960 (CD44)|1956 (EGFR)|2049 (EPHB3)|2064 (ERBB2)|2260 (FGFR1)|2560 (GABRB1)|2565 (GABRG1)|2697 (GJA1)|3679 (ITGA7)|4323 (MMP14)|4853 (NOTCH2)|4921 (DDR2)|5364 (PLXNB1)|5803 (PTPRZ1)|6507 (SLC1A3)|6509 (SLC1A4)|6517 (SLC2A4)|6538 (SLC6A11)|6542 (SLC7A2)|6563 (SLC14A1)|6565 (SLC15A2)|6574 (SLC20A1)|7412 (VCAM1)|8671 (SLC4A4)|…
		A	GO|GO.BP	GO:0060348	bone development	3.55343e-07	0.0404949	13	249 (ALPL)|658 (BMPR1B)|2737 (GLI3)|4211 (MEIS1)|4323 (MMP14)|4488 (MSX2)|4853 (NOTCH2)|5364 (PLXNB1)|6662 (SOX9)|7289 (TULP3)|9060 (PAPSS2)|51435 (SCARA3)|202151 (RANBP3L)
		A	GO|GO.BP	GO:0001655	urogenital system development	3.59742e-07	0.0409962	16	183 (AGT)|2049 (EPHB3)|2260 (FGFR1)|2735 (GLI1)|2736 (GLI2)|2737 (GLI3)|3371 (TNC)|3400 (ID4)|4854 (NOTCH3)|6662 (SOX9)|7042 (TGFB2)|9231 (DLG5)|27031 (NPHP3)|28999 (KLF15)|55366 (LGR4)|388585 (HES5)
		A	GO|GO.BP	GO:0071363	cellular response to growth factor stimulus	3.77484e-07	0.0430181	24	183 (AGT)|627 (BDNF)|658 (BMPR1B)|960 (CD44)|1956 (EGFR)|2064 (ERBB2)|2260 (FGFR1)|3082 (HGF)|3373 (HYAL1)|4052 (LTBP1)|4488 (MSX2)|5654 (HTRA1)|5764 (PTN)|6662 (SOX9)|7042 (TGFB2)|7057 (THBS1)|7412 (VCAM1)|10253 (SPRY2)|56963 (RGMA)|63976 (PRDM16)|143282 (FGFBP3)|286204 (CRB2)|348093 (RBPMS2)|388585 (HES5)
		A	GO|GO.BP	GO:0048589	developmental growth	4.05409e-07	0.0462004	23	183 (AGT)|627 (BDNF)|658 (BMPR1B)|2260 (FGFR1)|2735 (GLI1)|2736 (GLI2)|2737 (GLI3)|3371 (TNC)|4211 (MEIS1)|4488 (MSX2)|4921 (DDR2)|5454 (POU3F2)|5465 (PPARA)|6657 (SOX2)|6662 (SOX9)|7042 (TGFB2)|7430 (EZR)|10253 (SPRY2)|23286 (WWC1)|23499 (MACF1)|51435 (SCARA3)|57678 (GPAM)|59352 (LGR6)
		A	GO|GO.BP	GO:0021910	smoothened signaling pathway involved in ventral spinal cord patterning	4.16685e-07	0.0474854	4	2736 (GLI2)|2737 (GLI3)|5992 (RFX4)|7289 (TULP3)
		A	GO|GO.BP	GO:0009719	response to endogenous stimulus	4.32015e-07	0.0492324	40	183 (AGT)|249 (ALPL)|366 (AQP9)|477 (ATP1A2)|627 (BDNF)|658 (BMPR1B)|960 (CD44)|1956 (EGFR)|2064 (ERBB2)|2260 (FGFR1)|2560 (GABRB1)|3371 (TNC)|3373 (HYAL1)|4052 (LTBP1)|4129 (MAOB)|4323 (MMP14)|4488 (MSX2)|5166 (PDK4)|5465 (PPARA)|5654 (HTRA1)|5764 (PTN)|5925 (RB1)|6517 (SLC2A4)|6662 (SOX9)|7042 (TGFB2)|7057 (THBS1)|7078 (TIMP3)|7430 (EZR)|8660 (IRS2)|10253 (SPRY2)|23205 (ACSBG1)|55366 (LGR4)|569…
		EC	GO|GO.BP	GO:0072358	cardiovascular system development	1.15823e-24	1.31992e-19	62	94 (ACVRL1)|182 (JAG1)|187 (APLNR)|285 (ANGPT2)|301 (ANXA1)|302 (ANXA2)|306 (ANXA3)|857 (CAV1)|947 (CD34)|958 (CD40)|1003 (CDH5)|1282 (COL4A1)|2022 (ENG)|2050 (EPHB4)|2113 (ETS1)|2296 (FOXC1)|2321 (FLT1)|2324 (FLT4)|2335 (FN1)|2624 (GATA2)|2701 (GJA4)|2702 (GJA5)|2828 (GPR4)|3315 (HSPB1)|3339 (HSPG2)|3688 (ITGB1)|3784 (KCNQ1)|3911 (LAMA5)|3953 (LEPR)|4017 (LOXL2)|4091 (SMAD6)|4846 (NOS3)|4881 (NP…
		EC	GO|GO.BP	GO:0035239	tube morphogenesis	1.21156e-24	1.38069e-19	66	94 (ACVRL1)|182 (JAG1)|187 (APLNR)|285 (ANGPT2)|301 (ANXA1)|302 (ANXA2)|306 (ANXA3)|857 (CAV1)|947 (CD34)|958 (CD40)|1003 (CDH5)|1282 (COL4A1)|2022 (ENG)|2050 (EPHB4)|2113 (ETS1)|2296 (FOXC1)|2321 (FLT1)|2324 (FLT4)|2335 (FN1)|2624 (GATA2)|2702 (GJA5)|2828 (GPR4)|3315 (HSPB1)|3339 (HSPG2)|3688 (ITGB1)|3911 (LAMA5)|3953 (LEPR)|4017 (LOXL2)|4846 (NOS3)|4881 (NPR1)|5175 (PECAM1)|5420 (PODXL)|5547 (P…
		EC	GO|GO.BP	GO:0048514	blood vessel morphogenesis	1.9975e-24	2.27636e-19	57	94 (ACVRL1)|182 (JAG1)|187 (APLNR)|285 (ANGPT2)|301 (ANXA1)|302 (ANXA2)|306 (ANXA3)|857 (CAV1)|947 (CD34)|958 (CD40)|1003 (CDH5)|1282 (COL4A1)|2022 (ENG)|2050 (EPHB4)|2113 (ETS1)|2296 (FOXC1)|2321 (FLT1)|2324 (FLT4)|2335 (FN1)|2624 (GATA2)|2702 (GJA5)|2828 (GPR4)|3315 (HSPB1)|3339 (HSPG2)|3688 (ITGB1)|3911 (LAMA5)|3953 (LEPR)|4017 (LOXL2)|4846 (NOS3)|4881 (NPR1)|5175 (PECAM1)|5547 (PRCP)|5787 (PT…
		EC	GO|GO.BP	GO:0001568	blood vessel development	2.27157e-24	2.58868e-19	60	94 (ACVRL1)|182 (JAG1)|187 (APLNR)|285 (ANGPT2)|301 (ANXA1)|302 (ANXA2)|306 (ANXA3)|857 (CAV1)|947 (CD34)|958 (CD40)|1003 (CDH5)|1282 (COL4A1)|2022 (ENG)|2050 (EPHB4)|2113 (ETS1)|2296 (FOXC1)|2321 (FLT1)|2324 (FLT4)|2335 (FN1)|2624 (GATA2)|2701 (GJA4)|2702 (GJA5)|2828 (GPR4)|3315 (HSPB1)|3339 (HSPG2)|3688 (ITGB1)|3911 (LAMA5)|3953 (LEPR)|4017 (LOXL2)|4091 (SMAD6)|4846 (NOS3)|4881 (NPR1)|5175 (PEC…
		EC	GO|GO.BP	GO:0001944	vasculature development	2.20053e-23	2.50773e-18	60	94 (ACVRL1)|182 (JAG1)|187 (APLNR)|285 (ANGPT2)|301 (ANXA1)|302 (ANXA2)|306 (ANXA3)|857 (CAV1)|947 (CD34)|958 (CD40)|1003 (CDH5)|1282 (COL4A1)|2022 (ENG)|2050 (EPHB4)|2113 (ETS1)|2296 (FOXC1)|2321 (FLT1)|2324 (FLT4)|2335 (FN1)|2624 (GATA2)|2701 (GJA4)|2702 (GJA5)|2828 (GPR4)|3315 (HSPB1)|3339 (HSPG2)|3688 (ITGB1)|3911 (LAMA5)|3953 (LEPR)|4017 (LOXL2)|4091 (SMAD6)|4846 (NOS3)|4881 (NPR1)|5175 (PEC…
		EC	GO|GO.BP	GO:0001525	angiogenesis	2.59123e-23	2.95297e-18	52	94 (ACVRL1)|182 (JAG1)|187 (APLNR)|285 (ANGPT2)|301 (ANXA1)|302 (ANXA2)|306 (ANXA3)|857 (CAV1)|947 (CD34)|958 (CD40)|1003 (CDH5)|1282 (COL4A1)|2022 (ENG)|2050 (EPHB4)|2113 (ETS1)|2296 (FOXC1)|2321 (FLT1)|2324 (FLT4)|2335 (FN1)|2624 (GATA2)|2702 (GJA5)|2828 (GPR4)|3315 (HSPB1)|3339 (HSPG2)|3688 (ITGB1)|3911 (LAMA5)|3953 (LEPR)|4017 (LOXL2)|4846 (NOS3)|4881 (NPR1)|5175 (PECAM1)|5547 (PRCP)|5787 (PT…
		EC	GO|GO.BP	GO:0072359	circulatory system development	4.24278e-23	4.83507e-18	72	32 (ACACB)|94 (ACVRL1)|182 (JAG1)|187 (APLNR)|285 (ANGPT2)|301 (ANXA1)|302 (ANXA2)|306 (ANXA3)|857 (CAV1)|947 (CD34)|958 (CD40)|1003 (CDH5)|1282 (COL4A1)|1848 (DUSP6)|1889 (ECE1)|2022 (ENG)|2050 (EPHB4)|2113 (ETS1)|2296 (FOXC1)|2321 (FLT1)|2324 (FLT4)|2335 (FN1)|2624 (GATA2)|2701 (GJA4)|2702 (GJA5)|2828 (GPR4)|3315 (HSPB1)|3339 (HSPG2)|3688 (ITGB1)|3764 (KCNJ8)|3784 (KCNQ1)|3911 (LAMA5)|3953 (LEP…
		EC	GO|GO.BP	GO:0048646	anatomical structure formation involved in morphogenesis	2.23853e-22	2.55103e-17	71	94 (ACVRL1)|182 (JAG1)|187 (APLNR)|285 (ANGPT2)|301 (ANXA1)|302 (ANXA2)|306 (ANXA3)|857 (CAV1)|947 (CD34)|958 (CD40)|1003 (CDH5)|1282 (COL4A1)|2022 (ENG)|2050 (EPHB4)|2113 (ETS1)|2296 (FOXC1)|2321 (FLT1)|2324 (FLT4)|2335 (FN1)|2624 (GATA2)|2702 (GJA5)|2828 (GPR4)|3315 (HSPB1)|3339 (HSPG2)|3688 (ITGB1)|3911 (LAMA5)|3953 (LEPR)|4017 (LOXL2)|4487 (MSX1)|4846 (NOS3)|4881 (NPR1)|5175 (PECAM1)|5420 (PO…
		EC	GO|GO.BP	GO:0035295	tube development	2.98601e-22	3.40286e-17	69	94 (ACVRL1)|182 (JAG1)|187 (APLNR)|285 (ANGPT2)|301 (ANXA1)|302 (ANXA2)|306 (ANXA3)|857 (CAV1)|947 (CD34)|958 (CD40)|1003 (CDH5)|1282 (COL4A1)|2022 (ENG)|2050 (EPHB4)|2113 (ETS1)|2296 (FOXC1)|2321 (FLT1)|2324 (FLT4)|2335 (FN1)|2624 (GATA2)|2702 (GJA5)|2828 (GPR4)|3315 (HSPB1)|3339 (HSPG2)|3688 (ITGB1)|3911 (LAMA5)|3953 (LEPR)|4017 (LOXL2)|4091 (SMAD6)|4846 (NOS3)|4881 (NPR1)|5175 (PECAM1)|5420 (P…
		EC	GO|GO.CC	GO:0071944	cell periphery	2.4163e-20	2.75362e-15	173	81 (ACTN4)|94 (ACVRL1)|125 (ADH1B)|182 (JAG1)|187 (APLNR)|285 (ANGPT2)|301 (ANXA1)|302 (ANXA2)|306 (ANXA3)|308 (ANXA5)|368 (ABCC6)|389 (RHOC)|633 (BGN)|682 (BSG)|857 (CAV1)|947 (CD34)|958 (CD40)|966 (CD59)|977 (CD151)|1003 (CDH5)|1258 (CNGB1)|1317 (SLC31A1)|1378 (CR1)|1495 (CTNNA1)|1604 (CD55)|1889 (ECE1)|2012 (EMP1)|2022 (ENG)|2050 (EPHB4)|2321 (FLT1)|2324 (FLT4)|2335 (FN1)|2615 (LRRC32)|2701 (G…
		EC	GO|GO.BP	GO:0009653	anatomical structure morphogenesis	1.6347e-19	1.8629e-14	106	81 (ACTN4)|94 (ACVRL1)|182 (JAG1)|187 (APLNR)|285 (ANGPT2)|301 (ANXA1)|302 (ANXA2)|306 (ANXA3)|389 (RHOC)|682 (BSG)|857 (CAV1)|871 (SERPINH1)|947 (CD34)|958 (CD40)|977 (CD151)|1003 (CDH5)|1282 (COL4A1)|1495 (CTNNA1)|1889 (ECE1)|2022 (ENG)|2050 (EPHB4)|2113 (ETS1)|2296 (FOXC1)|2313 (FLI1)|2321 (FLT1)|2324 (FLT4)|2335 (FN1)|2624 (GATA2)|2702 (GJA5)|2828 (GPR4)|2886 (GRB7)|3251 (HPRT1)|3315 (HSPB1)|…
		EC	GO|GO.CC	GO:0005886	plasma membrane	4.59317e-19	5.23438e-14	168	94 (ACVRL1)|125 (ADH1B)|182 (JAG1)|187 (APLNR)|285 (ANGPT2)|301 (ANXA1)|302 (ANXA2)|306 (ANXA3)|308 (ANXA5)|368 (ABCC6)|389 (RHOC)|633 (BGN)|682 (BSG)|857 (CAV1)|947 (CD34)|958 (CD40)|966 (CD59)|977 (CD151)|1003 (CDH5)|1258 (CNGB1)|1317 (SLC31A1)|1378 (CR1)|1495 (CTNNA1)|1604 (CD55)|1889 (ECE1)|2012 (EMP1)|2022 (ENG)|2050 (EPHB4)|2321 (FLT1)|2324 (FLT4)|2335 (FN1)|2615 (LRRC32)|2701 (GJA4)|2702 (…
		EC	GO|GO.CC	GO:0044459	plasma membrane part	8.3222e-18	9.48398e-13	108	94 (ACVRL1)|182 (JAG1)|187 (APLNR)|301 (ANXA1)|302 (ANXA2)|308 (ANXA5)|368 (ABCC6)|389 (RHOC)|682 (BSG)|857 (CAV1)|947 (CD34)|958 (CD40)|966 (CD59)|977 (CD151)|1003 (CDH5)|1258 (CNGB1)|1317 (SLC31A1)|1378 (CR1)|1495 (CTNNA1)|1889 (ECE1)|2022 (ENG)|2050 (EPHB4)|2321 (FLT1)|2324 (FLT4)|2335 (FN1)|2615 (LRRC32)|2701 (GJA4)|2702 (GJA5)|2791 (GNG11)|2826 (CCR10)|2828 (GPR4)|3339 (HSPG2)|3356 (HTR2A)|3…
		EC	GO|GO.BP	GO:0051270	regulation of cellular component movement	2.88065e-17	3.28279e-12	60	81 (ACTN4)|94 (ACVRL1)|182 (JAG1)|285 (ANGPT2)|301 (ANXA1)|306 (ANXA3)|308 (ANXA5)|389 (RHOC)|857 (CAV1)|958 (CD40)|977 (CD151)|1495 (CTNNA1)|2022 (ENG)|2113 (ETS1)|2321 (FLT1)|2324 (FLT4)|2335 (FN1)|2624 (GATA2)|2702 (GJA5)|2886 (GRB7)|3315 (HSPB1)|3480 (IGF1R)|3554 (IL1R1)|3717 (JAK2)|3910 (LAMA4)|3911 (LAMA5)|4846 (NOS3)|5175 (PECAM1)|5420 (PODXL)|5547 (PRCP)|5979 (RET)|6237 (RRAS)|6591 (SNAI2…
		EC	GO|GO.BP	GO:0007155	cell adhesion	3.04264e-17	3.4674e-12	70	81 (ACTN4)|94 (ACVRL1)|182 (JAG1)|285 (ANGPT2)|301 (ANXA1)|302 (ANXA2)|306 (ANXA3)|682 (BSG)|857 (CAV1)|947 (CD34)|977 (CD151)|1003 (CDH5)|1495 (CTNNA1)|1604 (CD55)|1842 (ECM2)|2022 (ENG)|2050 (EPHB4)|2113 (ETS1)|2335 (FN1)|2615 (LRRC32)|3315 (HSPB1)|3384 (ICAM2)|3490 (IGFBP7)|3672 (ITGA1)|3688 (ITGB1)|3717 (JAK2)|3910 (LAMA4)|3911 (LAMA5)|3915 (LAMC1)|3987 (LIMS1)|4017 (LOXL2)|4059 (BCAM)|4091 (…
		EC	GO|GO.BP	GO:0022610	biological adhesion	4.11027e-17	4.68406e-12	70	81 (ACTN4)|94 (ACVRL1)|182 (JAG1)|285 (ANGPT2)|301 (ANXA1)|302 (ANXA2)|306 (ANXA3)|682 (BSG)|857 (CAV1)|947 (CD34)|977 (CD151)|1003 (CDH5)|1495 (CTNNA1)|1604 (CD55)|1842 (ECM2)|2022 (ENG)|2050 (EPHB4)|2113 (ETS1)|2335 (FN1)|2615 (LRRC32)|3315 (HSPB1)|3384 (ICAM2)|3490 (IGFBP7)|3672 (ITGA1)|3688 (ITGB1)|3717 (JAK2)|3910 (LAMA4)|3911 (LAMA5)|3915 (LAMC1)|3987 (LIMS1)|4017 (LOXL2)|4059 (BCAM)|4091 (…
		EC	GO|GO.BP	GO:2000145	regulation of cell motility	4.88673e-17	5.56891e-12	57	81 (ACTN4)|94 (ACVRL1)|182 (JAG1)|285 (ANGPT2)|301 (ANXA1)|306 (ANXA3)|308 (ANXA5)|389 (RHOC)|857 (CAV1)|958 (CD40)|977 (CD151)|1495 (CTNNA1)|2022 (ENG)|2113 (ETS1)|2321 (FLT1)|2324 (FLT4)|2335 (FN1)|2624 (GATA2)|2886 (GRB7)|3315 (HSPB1)|3480 (IGF1R)|3554 (IL1R1)|3717 (JAK2)|3910 (LAMA4)|3911 (LAMA5)|4846 (NOS3)|5175 (PECAM1)|5420 (PODXL)|5547 (PRCP)|5979 (RET)|6237 (RRAS)|6591 (SNAI2)|7010 (TEK)…
		EC	GO|GO.CC	GO:0062023	collagen-containing extracellular matrix	1.49667e-16	1.7056e-11	33	301 (ANXA1)|302 (ANXA2)|308 (ANXA5)|633 (BGN)|871 (SERPINH1)|977 (CD151)|1282 (COL4A1)|1842 (ECM2)|2335 (FN1)|3339 (HSPG2)|3490 (IGFBP7)|3910 (LAMA4)|3911 (LAMA5)|3915 (LAMC1)|4017 (LOXL2)|4059 (BCAM)|4256 (MGP)|4811 (NID1)|5265 (SERPINA1)|5269 (SERPINB6)|5272 (SERPINB9)|7041 (TGFB1I1)|7076 (TIMP1)|7448 (VTN)|7450 (VWF)|10516 (FBLN5)|22915 (MMRN1)|56999 (ADAMTS9)|64129 (TINAGL1)|79812 (MMRN2)|838…
		EC	GO|GO.BP	GO:0048583	regulation of response to stimulus	1.61374e-16	1.83901e-11	136	81 (ACTN4)|94 (ACVRL1)|182 (JAG1)|187 (APLNR)|285 (ANGPT2)|301 (ANXA1)|302 (ANXA2)|306 (ANXA3)|308 (ANXA5)|389 (RHOC)|857 (CAV1)|947 (CD34)|958 (CD40)|966 (CD59)|1003 (CDH5)|1030 (CDKN2B)|1258 (CNGB1)|1378 (CR1)|1495 (CTNNA1)|1604 (CD55)|1848 (DUSP6)|1997 (ELF1)|2022 (ENG)|2050 (EPHB4)|2113 (ETS1)|2122 (MECOM)|2321 (FLT1)|2324 (FLT4)|2335 (FN1)|2624 (GATA2)|2828 (GPR4)|2886 (GRB7)|3090 (HIC1)|331…
		EC	GO|GO.BP	GO:0030334	regulation of cell migration	2.64285e-16	3.01179e-11	54	81 (ACTN4)|94 (ACVRL1)|182 (JAG1)|285 (ANGPT2)|301 (ANXA1)|306 (ANXA3)|389 (RHOC)|857 (CAV1)|958 (CD40)|977 (CD151)|2022 (ENG)|2113 (ETS1)|2321 (FLT1)|2324 (FLT4)|2335 (FN1)|2624 (GATA2)|2886 (GRB7)|3315 (HSPB1)|3480 (IGF1R)|3554 (IL1R1)|3717 (JAK2)|3910 (LAMA4)|3911 (LAMA5)|4846 (NOS3)|5175 (PECAM1)|5420 (PODXL)|5547 (PRCP)|5979 (RET)|6237 (RRAS)|6591 (SNAI2)|7010 (TEK)|7074 (TIAM1)|7075 (TIE1)|…
		EC	GO|GO.BP	GO:0040012	regulation of locomotion	3.18149e-16	3.62563e-11	58	81 (ACTN4)|94 (ACVRL1)|182 (JAG1)|285 (ANGPT2)|301 (ANXA1)|306 (ANXA3)|308 (ANXA5)|389 (RHOC)|857 (CAV1)|958 (CD40)|977 (CD151)|1495 (CTNNA1)|2022 (ENG)|2113 (ETS1)|2321 (FLT1)|2324 (FLT4)|2335 (FN1)|2624 (GATA2)|2886 (GRB7)|3315 (HSPB1)|3480 (IGF1R)|3554 (IL1R1)|3717 (JAK2)|3910 (LAMA4)|3911 (LAMA5)|4846 (NOS3)|5175 (PECAM1)|5420 (PODXL)|5547 (PRCP)|5979 (RET)|6237 (RRAS)|6591 (SNAI2)|7010 (TEK)…
		EC	GO|GO.CC	GO:0031012	extracellular matrix	4.53292e-16	5.16571e-11	39	301 (ANXA1)|302 (ANXA2)|308 (ANXA5)|633 (BGN)|871 (SERPINH1)|977 (CD151)|1282 (COL4A1)|1842 (ECM2)|2335 (FN1)|2615 (LRRC32)|3339 (HSPG2)|3490 (IGFBP7)|3910 (LAMA4)|3911 (LAMA5)|3915 (LAMC1)|4017 (LOXL2)|4059 (BCAM)|4256 (MGP)|4811 (NID1)|4982 (TNFRSF11B)|5265 (SERPINA1)|5269 (SERPINB6)|5272 (SERPINB9)|7041 (TGFB1I1)|7049 (TGFBR3)|7076 (TIMP1)|7448 (VTN)|7450 (VWF)|10417 (SPON2)|10516 (FBLN5)|2291…
		EC	GO|GO.BP	GO:0050896	response to stimulus	5.24032e-16	5.97187e-11	224	32 (ACACB)|81 (ACTN4)|94 (ACVRL1)|182 (JAG1)|187 (APLNR)|285 (ANGPT2)|301 (ANXA1)|302 (ANXA2)|306 (ANXA3)|308 (ANXA5)|368 (ABCC6)|389 (RHOC)|682 (BSG)|839 (CASP6)|840 (CASP7)|857 (CAV1)|871 (SERPINH1)|947 (CD34)|958 (CD40)|966 (CD59)|977 (CD151)|1003 (CDH5)|1030 (CDKN2B)|1258 (CNGB1)|1282 (COL4A1)|1317 (SLC31A1)|1378 (CR1)|1390 (CREM)|1495 (CTNNA1)|1604 (CD55)|1848 (DUSP6)|1997 (ELF1)|2022 (ENG)|…
		EC	GO|GO.BP	GO:0016477	cell migration	1.56218e-15	1.78026e-10	71	81 (ACTN4)|94 (ACVRL1)|182 (JAG1)|285 (ANGPT2)|301 (ANXA1)|306 (ANXA3)|389 (RHOC)|682 (BSG)|857 (CAV1)|947 (CD34)|958 (CD40)|977 (CD151)|2022 (ENG)|2050 (EPHB4)|2113 (ETS1)|2296 (FOXC1)|2321 (FLT1)|2324 (FLT4)|2335 (FN1)|2624 (GATA2)|2826 (CCR10)|2886 (GRB7)|3315 (HSPB1)|3480 (IGF1R)|3554 (IL1R1)|3672 (ITGA1)|3688 (ITGB1)|3717 (JAK2)|3910 (LAMA4)|3911 (LAMA5)|3915 (LAMC1)|4017 (LOXL2)|4846 (NOS3)…
		EC	GO|GO.BP	GO:0048870	cell motility	1.64457e-15	1.87415e-10	75	81 (ACTN4)|94 (ACVRL1)|182 (JAG1)|285 (ANGPT2)|301 (ANXA1)|306 (ANXA3)|308 (ANXA5)|389 (RHOC)|682 (BSG)|857 (CAV1)|947 (CD34)|958 (CD40)|977 (CD151)|1495 (CTNNA1)|2022 (ENG)|2050 (EPHB4)|2113 (ETS1)|2296 (FOXC1)|2321 (FLT1)|2324 (FLT4)|2335 (FN1)|2624 (GATA2)|2826 (CCR10)|2886 (GRB7)|3315 (HSPB1)|3480 (IGF1R)|3554 (IL1R1)|3672 (ITGA1)|3688 (ITGB1)|3717 (JAK2)|3910 (LAMA4)|3911 (LAMA5)|3915 (LAMC1…
		EC	GO|GO.BP	GO:0051674	localization of cell	1.64457e-15	1.87415e-10	75	81 (ACTN4)|94 (ACVRL1)|182 (JAG1)|285 (ANGPT2)|301 (ANXA1)|306 (ANXA3)|308 (ANXA5)|389 (RHOC)|682 (BSG)|857 (CAV1)|947 (CD34)|958 (CD40)|977 (CD151)|1495 (CTNNA1)|2022 (ENG)|2050 (EPHB4)|2113 (ETS1)|2296 (FOXC1)|2321 (FLT1)|2324 (FLT4)|2335 (FN1)|2624 (GATA2)|2826 (CCR10)|2886 (GRB7)|3315 (HSPB1)|3480 (IGF1R)|3554 (IL1R1)|3672 (ITGA1)|3688 (ITGB1)|3717 (JAK2)|3910 (LAMA4)|3911 (LAMA5)|3915 (LAMC1…
		EC	GO|GO.BP	GO:0031589	cell-substrate adhesion	1.78623e-15	2.03558e-10	32	81 (ACTN4)|94 (ACVRL1)|182 (JAG1)|285 (ANGPT2)|947 (CD34)|1842 (ECM2)|2335 (FN1)|3672 (ITGA1)|3688 (ITGB1)|3717 (JAK2)|3911 (LAMA5)|3915 (LAMC1)|3987 (LIMS1)|4059 (BCAM)|4091 (SMAD6)|4811 (NID1)|5175 (PECAM1)|7010 (TEK)|7074 (TIAM1)|7402 (UTRN)|7448 (VTN)|7450 (VWF)|8174 (MADCAM1)|8322 (FZD4)|8826 (IQGAP1)|10395 (DLC1)|10516 (FBLN5)|22915 (MMRN1)|29984 (RHOD)|56999 (ADAMTS9)|79812 (MMRN2)|340485 …
		EC	GO|GO.BP	GO:0040011	locomotion	3.85206e-15	4.38981e-10	80	81 (ACTN4)|94 (ACVRL1)|182 (JAG1)|285 (ANGPT2)|301 (ANXA1)|306 (ANXA3)|308 (ANXA5)|389 (RHOC)|682 (BSG)|857 (CAV1)|947 (CD34)|958 (CD40)|977 (CD151)|1495 (CTNNA1)|2022 (ENG)|2050 (EPHB4)|2113 (ETS1)|2296 (FOXC1)|2321 (FLT1)|2324 (FLT4)|2335 (FN1)|2624 (GATA2)|2826 (CCR10)|2886 (GRB7)|3315 (HSPB1)|3480 (IGF1R)|3554 (IL1R1)|3672 (ITGA1)|3688 (ITGB1)|3717 (JAK2)|3910 (LAMA4)|3911 (LAMA5)|3915 (LAMC1…
		EC	GO|GO.BP	GO:0050793	regulation of developmental process	3.91316e-15	4.45944e-10	97	32 (ACACB)|81 (ACTN4)|94 (ACVRL1)|182 (JAG1)|187 (APLNR)|285 (ANGPT2)|301 (ANXA1)|302 (ANXA2)|306 (ANXA3)|389 (RHOC)|663 (BNIP2)|857 (CAV1)|947 (CD34)|958 (CD40)|1003 (CDH5)|1378 (CR1)|1495 (CTNNA1)|1848 (DUSP6)|2022 (ENG)|2113 (ETS1)|2296 (FOXC1)|2321 (FLT1)|2324 (FLT4)|2335 (FN1)|2624 (GATA2)|2828 (GPR4)|3315 (HSPB1)|3339 (HSPG2)|3356 (HTR2A)|3665 (IRF7)|3688 (ITGB1)|3717 (JAK2)|3910 (LAMA4)|39…
		EC	GO|GO.BP	GO:0032502	developmental process	5.20903e-15	5.93621e-10	171	32 (ACACB)|81 (ACTN4)|94 (ACVRL1)|182 (JAG1)|187 (APLNR)|285 (ANGPT2)|301 (ANXA1)|302 (ANXA2)|306 (ANXA3)|389 (RHOC)|663 (BNIP2)|682 (BSG)|839 (CASP6)|857 (CAV1)|871 (SERPINH1)|947 (CD34)|958 (CD40)|977 (CD151)|1003 (CDH5)|1030 (CDKN2B)|1258 (CNGB1)|1282 (COL4A1)|1349 (COX7B)|1378 (CR1)|1390 (CREM)|1495 (CTNNA1)|1848 (DUSP6)|1879 (EBF1)|1889 (ECE1)|1997 (ELF1)|2012 (EMP1)|2022 (ENG)|2050 (EPHB4)|…
		EC	GO|GO.BP	GO:0045765	regulation of angiogenesis	8.47118e-15	9.65376e-10	33	94 (ACVRL1)|187 (APLNR)|285 (ANGPT2)|301 (ANXA1)|306 (ANXA3)|947 (CD34)|958 (CD40)|1003 (CDH5)|2022 (ENG)|2113 (ETS1)|2296 (FOXC1)|2321 (FLT1)|2624 (GATA2)|2828 (GPR4)|3315 (HSPB1)|3339 (HSPG2)|3688 (ITGB1)|4846 (NOS3)|4881 (NPR1)|6237 (RRAS)|7010 (TEK)|7075 (TIE1)|7424 (VEGFC)|10769 (PLK2)|11235 (PDCD10)|25865 (PRKD2)|29775 (CARD10)|51129 (ANGPTL4)|54567 (DLL4)|56999 (ADAMTS9)|57381 (RHOJ)|79812…
		EC	GO|GO.BP	GO:0048856	anatomical structure development	1.86253e-14	2.12254e-09	162	32 (ACACB)|81 (ACTN4)|94 (ACVRL1)|182 (JAG1)|187 (APLNR)|285 (ANGPT2)|301 (ANXA1)|302 (ANXA2)|306 (ANXA3)|389 (RHOC)|663 (BNIP2)|682 (BSG)|839 (CASP6)|857 (CAV1)|871 (SERPINH1)|947 (CD34)|958 (CD40)|977 (CD151)|1003 (CDH5)|1030 (CDKN2B)|1258 (CNGB1)|1282 (COL4A1)|1349 (COX7B)|1378 (CR1)|1390 (CREM)|1495 (CTNNA1)|1848 (DUSP6)|1879 (EBF1)|1889 (ECE1)|2012 (EMP1)|2022 (ENG)|2050 (EPHB4)|2078 (ERG)|2…
		EC	GO|GO.BP	GO:0051239	regulation of multicellular organismal process	3.21757e-14	3.66674e-09	106	32 (ACACB)|94 (ACVRL1)|182 (JAG1)|187 (APLNR)|285 (ANGPT2)|301 (ANXA1)|302 (ANXA2)|306 (ANXA3)|308 (ANXA5)|857 (CAV1)|947 (CD34)|958 (CD40)|1003 (CDH5)|1378 (CR1)|1495 (CTNNA1)|1848 (DUSP6)|1889 (ECE1)|1997 (ELF1)|2022 (ENG)|2113 (ETS1)|2296 (FOXC1)|2321 (FLT1)|2324 (FLT4)|2335 (FN1)|2615 (LRRC32)|2624 (GATA2)|2702 (GJA5)|2828 (GPR4)|3315 (HSPB1)|3339 (HSPG2)|3356 (HTR2A)|3480 (IGF1R)|3554 (IL1R1…
		EC	GO|GO.BP	GO:0023051	regulation of signaling	4.48472e-14	5.11079e-09	116	81 (ACTN4)|94 (ACVRL1)|182 (JAG1)|187 (APLNR)|301 (ANXA1)|302 (ANXA2)|306 (ANXA3)|308 (ANXA5)|389 (RHOC)|857 (CAV1)|958 (CD40)|1030 (CDKN2B)|1258 (CNGB1)|1495 (CTNNA1)|1604 (CD55)|1848 (DUSP6)|1889 (ECE1)|1997 (ELF1)|2022 (ENG)|2050 (EPHB4)|2122 (MECOM)|2321 (FLT1)|2324 (FLT4)|2335 (FN1)|2624 (GATA2)|2702 (GJA5)|2828 (GPR4)|2886 (GRB7)|3090 (HIC1)|3315 (HSPB1)|3356 (HTR2A)|3480 (IGF1R)|3554 (IL1R…
		EC	GO|GO.BP	GO:0022603	regulation of anatomical structure morphogenesis	4.59101e-14	5.23192e-09	56	81 (ACTN4)|94 (ACVRL1)|182 (JAG1)|187 (APLNR)|285 (ANGPT2)|301 (ANXA1)|306 (ANXA3)|389 (RHOC)|947 (CD34)|958 (CD40)|1003 (CDH5)|2022 (ENG)|2113 (ETS1)|2296 (FOXC1)|2321 (FLT1)|2324 (FLT4)|2335 (FN1)|2624 (GATA2)|2828 (GPR4)|3315 (HSPB1)|3339 (HSPG2)|3688 (ITGB1)|3987 (LIMS1)|4487 (MSX1)|4846 (NOS3)|4881 (NPR1)|4982 (TNFRSF11B)|5979 (RET)|6237 (RRAS)|6591 (SNAI2)|6909 (TBX2)|7010 (TEK)|7074 (TIAM1…
		EC	GO|GO.BP	GO:0043542	endothelial cell migration	5.73461e-14	6.53517e-09	27	94 (ACVRL1)|285 (ANGPT2)|301 (ANXA1)|306 (ANXA3)|958 (CD40)|2050 (EPHB4)|2113 (ETS1)|2324 (FLT4)|2624 (GATA2)|3315 (HSPB1)|3688 (ITGB1)|4017 (LOXL2)|4846 (NOS3)|5175 (PECAM1)|5547 (PRCP)|7010 (TEK)|7424 (VEGFC)|10769 (PLK2)|11235 (PDCD10)|25865 (PRKD2)|29775 (CARD10)|54567 (DLL4)|56999 (ADAMTS9)|57381 (RHOJ)|79812 (MMRN2)|90627 (STARD13)|161198 (CLEC14A)
		EC	GO|GO.BP	GO:0006928	movement of cell or subcellular component	7.47855e-14	8.52255e-09	83	81 (ACTN4)|94 (ACVRL1)|182 (JAG1)|285 (ANGPT2)|301 (ANXA1)|306 (ANXA3)|308 (ANXA5)|389 (RHOC)|682 (BSG)|857 (CAV1)|947 (CD34)|958 (CD40)|977 (CD151)|1495 (CTNNA1)|2022 (ENG)|2050 (EPHB4)|2113 (ETS1)|2296 (FOXC1)|2321 (FLT1)|2324 (FLT4)|2335 (FN1)|2624 (GATA2)|2702 (GJA5)|2826 (CCR10)|2886 (GRB7)|3315 (HSPB1)|3480 (IGF1R)|3554 (IL1R1)|3672 (ITGA1)|3688 (ITGB1)|3717 (JAK2)|3764 (KCNJ8)|3784 (KCNQ1)…
		EC	GO|GO.BP	GO:0010646	regulation of cell communication	1.42718e-13	1.62642e-08	114	81 (ACTN4)|94 (ACVRL1)|182 (JAG1)|187 (APLNR)|301 (ANXA1)|306 (ANXA3)|308 (ANXA5)|389 (RHOC)|857 (CAV1)|958 (CD40)|1030 (CDKN2B)|1258 (CNGB1)|1495 (CTNNA1)|1604 (CD55)|1848 (DUSP6)|1997 (ELF1)|2022 (ENG)|2050 (EPHB4)|2122 (MECOM)|2321 (FLT1)|2324 (FLT4)|2335 (FN1)|2624 (GATA2)|2702 (GJA5)|2828 (GPR4)|2886 (GRB7)|3090 (HIC1)|3315 (HSPB1)|3356 (HTR2A)|3480 (IGF1R)|3554 (IL1R1)|3665 (IRF7)|3672 (ITG…
		EC	GO|GO.BP	GO:1901342	regulation of vasculature development	1.45172e-13	1.65438e-08	33	94 (ACVRL1)|187 (APLNR)|285 (ANGPT2)|301 (ANXA1)|306 (ANXA3)|947 (CD34)|958 (CD40)|1003 (CDH5)|2022 (ENG)|2113 (ETS1)|2296 (FOXC1)|2321 (FLT1)|2624 (GATA2)|2828 (GPR4)|3315 (HSPB1)|3339 (HSPG2)|3688 (ITGB1)|4846 (NOS3)|4881 (NPR1)|6237 (RRAS)|7010 (TEK)|7075 (TIE1)|7424 (VEGFC)|10769 (PLK2)|11235 (PDCD10)|25865 (PRKD2)|29775 (CARD10)|51129 (ANGPTL4)|54567 (DLL4)|56999 (ADAMTS9)|57381 (RHOJ)|79812…
		EC	GO|GO.BP	GO:0051179	localization	2.00569e-13	2.28569e-08	173	32 (ACACB)|81 (ACTN4)|94 (ACVRL1)|182 (JAG1)|187 (APLNR)|285 (ANGPT2)|301 (ANXA1)|302 (ANXA2)|306 (ANXA3)|308 (ANXA5)|368 (ABCC6)|389 (RHOC)|682 (BSG)|689 (BTF3)|857 (CAV1)|947 (CD34)|958 (CD40)|966 (CD59)|977 (CD151)|1258 (CNGB1)|1317 (SLC31A1)|1349 (COX7B)|1378 (CR1)|1495 (CTNNA1)|1604 (CD55)|2022 (ENG)|2050 (EPHB4)|2113 (ETS1)|2296 (FOXC1)|2321 (FLT1)|2324 (FLT4)|2335 (FN1)|2615 (LRRC32)|2624 …
		EC	GO|GO.BP	GO:0009966	regulation of signal transduction	2.14392e-13	2.44321e-08	106	81 (ACTN4)|94 (ACVRL1)|182 (JAG1)|187 (APLNR)|306 (ANXA3)|389 (RHOC)|857 (CAV1)|958 (CD40)|1030 (CDKN2B)|1258 (CNGB1)|1495 (CTNNA1)|1604 (CD55)|1848 (DUSP6)|1997 (ELF1)|2022 (ENG)|2050 (EPHB4)|2122 (MECOM)|2321 (FLT1)|2324 (FLT4)|2335 (FN1)|2624 (GATA2)|2828 (GPR4)|2886 (GRB7)|3090 (HIC1)|3315 (HSPB1)|3356 (HTR2A)|3480 (IGF1R)|3554 (IL1R1)|3665 (IRF7)|3672 (ITGA1)|3688 (ITGB1)|3717 (JAK2)|3987 (L…
		EC	GO|GO.BP	GO:0010033	response to organic substance	4.34902e-13	4.95614e-08	105	32 (ACACB)|94 (ACVRL1)|182 (JAG1)|285 (ANGPT2)|301 (ANXA1)|302 (ANXA2)|306 (ANXA3)|308 (ANXA5)|682 (BSG)|839 (CASP6)|840 (CASP7)|857 (CAV1)|871 (SERPINH1)|958 (CD40)|1003 (CDH5)|1030 (CDKN2B)|1282 (COL4A1)|1495 (CTNNA1)|1604 (CD55)|1848 (DUSP6)|1997 (ELF1)|2022 (ENG)|2113 (ETS1)|2296 (FOXC1)|2321 (FLT1)|2324 (FLT4)|2335 (FN1)|2615 (LRRC32)|2624 (GATA2)|2634 (GBP2)|2826 (CCR10)|3251 (HPRT1)|3315 (…
		EC	GO|GO.CC	GO:0031982	vesicle	5.355e-13	6.10256e-08	119	81 (ACTN4)|301 (ANXA1)|302 (ANXA2)|306 (ANXA3)|308 (ANXA5)|389 (RHOC)|633 (BGN)|682 (BSG)|822 (CAPG)|857 (CAV1)|958 (CD40)|966 (CD59)|1258 (CNGB1)|1317 (SLC31A1)|1378 (CR1)|1495 (CTNNA1)|1604 (CD55)|1889 (ECE1)|2050 (EPHB4)|2321 (FLT1)|2335 (FN1)|2632 (GBE1)|3251 (HPRT1)|3315 (HSPB1)|3339 (HSPG2)|3356 (HTR2A)|3426 (CFI)|3454 (IFNAR1)|3490 (IGFBP7)|3665 (IRF7)|3672 (ITGA1)|3688 (ITGB1)|3717 (JAK2)…
		EC	GO|GO.BP	GO:0051716	cellular response to stimulus	7.84378e-13	8.93877e-08	187	81 (ACTN4)|94 (ACVRL1)|182 (JAG1)|187 (APLNR)|285 (ANGPT2)|301 (ANXA1)|302 (ANXA2)|306 (ANXA3)|308 (ANXA5)|389 (RHOC)|682 (BSG)|839 (CASP6)|840 (CASP7)|857 (CAV1)|947 (CD34)|958 (CD40)|966 (CD59)|977 (CD151)|1003 (CDH5)|1030 (CDKN2B)|1258 (CNGB1)|1282 (COL4A1)|1317 (SLC31A1)|1378 (CR1)|1390 (CREM)|1495 (CTNNA1)|1604 (CD55)|1848 (DUSP6)|1997 (ELF1)|2022 (ENG)|2050 (EPHB4)|2078 (ERG)|2113 (ETS1)|21…
		EC	GO|GO.BP	GO:0006950	response to stress	7.99999e-13	9.11679e-08	120	81 (ACTN4)|94 (ACVRL1)|285 (ANGPT2)|301 (ANXA1)|302 (ANXA2)|306 (ANXA3)|308 (ANXA5)|389 (RHOC)|857 (CAV1)|871 (SERPINH1)|947 (CD34)|958 (CD40)|966 (CD59)|977 (CD151)|1003 (CDH5)|1378 (CR1)|1495 (CTNNA1)|1604 (CD55)|1848 (DUSP6)|2113 (ETS1)|2122 (MECOM)|2324 (FLT4)|2335 (FN1)|2624 (GATA2)|2634 (GBP2)|2701 (GJA4)|2828 (GPR4)|3090 (HIC1)|3315 (HSPB1)|3339 (HSPG2)|3384 (ICAM2)|3426 (CFI)|3454 (IFNAR1…
		EC	GO|GO.BP	GO:0009888	tissue development	1.25297e-12	1.42789e-07	76	94 (ACVRL1)|182 (JAG1)|301 (ANXA1)|302 (ANXA2)|389 (RHOC)|682 (BSG)|839 (CASP6)|857 (CAV1)|871 (SERPINH1)|947 (CD34)|977 (CD151)|1003 (CDH5)|1282 (COL4A1)|2012 (EMP1)|2022 (ENG)|2296 (FOXC1)|2335 (FN1)|2701 (GJA4)|2702 (GJA5)|2828 (GPR4)|3688 (ITGB1)|3717 (JAK2)|3911 (LAMA5)|3915 (LAMC1)|4017 (LOXL2)|4091 (SMAD6)|4256 (MGP)|4487 (MSX1)|4831 (NME2)|4846 (NOS3)|5175 (PECAM1)|5420 (PODXL)|5552 (SRGN…
		EC	GO|GO.BP	GO:0060429	epithelium development	1.27758e-12	1.45593e-07	57	94 (ACVRL1)|182 (JAG1)|301 (ANXA1)|302 (ANXA2)|389 (RHOC)|839 (CASP6)|857 (CAV1)|947 (CD34)|977 (CD151)|1003 (CDH5)|1282 (COL4A1)|2022 (ENG)|2296 (FOXC1)|2701 (GJA4)|2702 (GJA5)|2828 (GPR4)|3717 (JAK2)|3911 (LAMA5)|4091 (SMAD6)|4487 (MSX1)|4831 (NME2)|5175 (PECAM1)|5420 (PODXL)|5583 (PRKCH)|5979 (RET)|6591 (SNAI2)|6788 (STK3)|6909 (TBX2)|6926 (TBX3)|7041 (TGFB1I1)|7074 (TIAM1)|7122 (CLDN5)|7424 (…
		EC	GO|GO.BP	GO:0023052	signaling	1.54955e-12	1.76587e-07	169	81 (ACTN4)|94 (ACVRL1)|182 (JAG1)|187 (APLNR)|285 (ANGPT2)|301 (ANXA1)|302 (ANXA2)|306 (ANXA3)|308 (ANXA5)|389 (RHOC)|682 (BSG)|857 (CAV1)|947 (CD34)|958 (CD40)|966 (CD59)|977 (CD151)|1003 (CDH5)|1030 (CDKN2B)|1258 (CNGB1)|1282 (COL4A1)|1378 (CR1)|1390 (CREM)|1495 (CTNNA1)|1604 (CD55)|1848 (DUSP6)|1889 (ECE1)|1997 (ELF1)|2022 (ENG)|2050 (EPHB4)|2078 (ERG)|2122 (MECOM)|2296 (FOXC1)|2321 (FLT1)|232…
		EC	GO|GO.BP	GO:0070887	cellular response to chemical stimulus	1.55612e-12	1.77336e-07	103	94 (ACVRL1)|285 (ANGPT2)|301 (ANXA1)|302 (ANXA2)|308 (ANXA5)|839 (CASP6)|840 (CASP7)|857 (CAV1)|947 (CD34)|958 (CD40)|1003 (CDH5)|1030 (CDKN2B)|1282 (COL4A1)|1317 (SLC31A1)|1495 (CTNNA1)|1604 (CD55)|1997 (ELF1)|2022 (ENG)|2113 (ETS1)|2296 (FOXC1)|2321 (FLT1)|2324 (FLT4)|2335 (FN1)|2615 (LRRC32)|2634 (GBP2)|2826 (CCR10)|3315 (HSPB1)|3454 (IFNAR1)|3480 (IGF1R)|3490 (IGFBP7)|3554 (IL1R1)|3665 (IRF7)…
		EC	GO|GO.BP	GO:0034329	cell junction assembly	1.72909e-12	1.97047e-07	24	81 (ACTN4)|94 (ACVRL1)|389 (RHOC)|857 (CAV1)|977 (CD151)|1003 (CDH5)|1495 (CTNNA1)|2335 (FN1)|2701 (GJA4)|2702 (GJA5)|3911 (LAMA5)|3915 (LAMC1)|3987 (LIMS1)|5583 (PRKCH)|6591 (SNAI2)|7010 (TEK)|7122 (CLDN5)|8826 (IQGAP1)|10395 (DLC1)|29984 (RHOD)|51599 (LSR)|57493 (HEG1)|153562 (MARVELD2)|100506658 (OCLN)
		EC	GO|GO.BP	GO:0007166	cell surface receptor signaling pathway	1.9881e-12	2.26564e-07	99	94 (ACVRL1)|182 (JAG1)|285 (ANGPT2)|301 (ANXA1)|302 (ANXA2)|306 (ANXA3)|682 (BSG)|857 (CAV1)|958 (CD40)|966 (CD59)|977 (CD151)|1003 (CDH5)|1030 (CDKN2B)|1282 (COL4A1)|1378 (CR1)|1495 (CTNNA1)|1604 (CD55)|1997 (ELF1)|2022 (ENG)|2050 (EPHB4)|2296 (FOXC1)|2321 (FLT1)|2324 (FLT4)|2335 (FN1)|2615 (LRRC32)|2624 (GATA2)|2634 (GBP2)|2826 (CCR10)|2886 (GRB7)|3090 (HIC1)|3315 (HSPB1)|3384 (ICAM2)|3454 (IFN…
		EC	GO|GO.BP	GO:0045766	positive regulation of angiogenesis	2.61222e-12	2.97688e-07	22	94 (ACVRL1)|187 (APLNR)|285 (ANGPT2)|301 (ANXA1)|306 (ANXA3)|947 (CD34)|958 (CD40)|1003 (CDH5)|2022 (ENG)|2113 (ETS1)|2321 (FLT1)|2624 (GATA2)|3315 (HSPB1)|3688 (ITGB1)|4846 (NOS3)|6237 (RRAS)|7010 (TEK)|7424 (VEGFC)|10769 (PLK2)|25865 (PRKD2)|51129 (ANGPTL4)|57381 (RHOJ)
		EC	GO|GO.BP	GO:0003158	endothelium development	2.69686e-12	3.07334e-07	18	94 (ACVRL1)|182 (JAG1)|302 (ANXA2)|947 (CD34)|1003 (CDH5)|2022 (ENG)|2701 (GJA4)|2702 (GJA5)|3911 (LAMA5)|5175 (PECAM1)|7122 (CLDN5)|25865 (PRKD2)|30061 (SLC40A1)|57493 (HEG1)|64321 (SOX17)|81575 (APOLD1)|90627 (STARD13)|153562 (MARVELD2)
		EC	GO|GO.BP	GO:0007160	cell-matrix adhesion	2.89586e-12	3.30012e-07	23	94 (ACVRL1)|182 (JAG1)|947 (CD34)|1842 (ECM2)|2335 (FN1)|3672 (ITGA1)|3688 (ITGB1)|3911 (LAMA5)|3987 (LIMS1)|4059 (BCAM)|4811 (NID1)|5175 (PECAM1)|7010 (TEK)|7074 (TIAM1)|7402 (UTRN)|7448 (VTN)|8174 (MADCAM1)|8826 (IQGAP1)|10395 (DLC1)|10516 (FBLN5)|29984 (RHOD)|56999 (ADAMTS9)|340485 (ACER2)
		EC	GO|GO.BP	GO:0043534	blood vessel endothelial cell migration	3.27985e-12	3.73771e-07	21	94 (ACVRL1)|285 (ANGPT2)|301 (ANXA1)|958 (CD40)|2050 (EPHB4)|2113 (ETS1)|2624 (GATA2)|3315 (HSPB1)|3688 (ITGB1)|4846 (NOS3)|5547 (PRCP)|7424 (VEGFC)|10769 (PLK2)|11235 (PDCD10)|25865 (PRKD2)|29775 (CARD10)|54567 (DLL4)|57381 (RHOJ)|79812 (MMRN2)|90627 (STARD13)|161198 (CLEC14A)
		EC	GO|GO.BP	GO:0048518	positive regulation of biological process	4.13364e-12	4.7107e-07	160	32 (ACACB)|81 (ACTN4)|94 (ACVRL1)|182 (JAG1)|187 (APLNR)|285 (ANGPT2)|301 (ANXA1)|302 (ANXA2)|306 (ANXA3)|308 (ANXA5)|389 (RHOC)|663 (BNIP2)|857 (CAV1)|947 (CD34)|958 (CD40)|966 (CD59)|977 (CD151)|1003 (CDH5)|1030 (CDKN2B)|1163 (CKS1B)|1378 (CR1)|1390 (CREM)|1495 (CTNNA1)|1604 (CD55)|1842 (ECM2)|1848 (DUSP6)|1879 (EBF1)|1889 (ECE1)|1997 (ELF1)|2022 (ENG)|2050 (EPHB4)|2078 (ERG)|2113 (ETS1)|2122 (…
		EC	GO|GO.BP	GO:0008283	cell proliferation	4.45462e-12	5.07649e-07	78	94 (ACVRL1)|182 (JAG1)|187 (APLNR)|301 (ANXA1)|302 (ANXA2)|857 (CAV1)|947 (CD34)|958 (CD40)|977 (CD151)|1030 (CDKN2B)|1033 (CDKN3)|1163 (CKS1B)|1495 (CTNNA1)|1604 (CD55)|2012 (EMP1)|2078 (ERG)|2113 (ETS1)|2122 (MECOM)|2296 (FOXC1)|2321 (FLT1)|2324 (FLT4)|2335 (FN1)|2615 (LRRC32)|2624 (GATA2)|3251 (HPRT1)|3356 (HTR2A)|3480 (IGF1R)|3490 (IGFBP7)|3672 (ITGA1)|3688 (ITGB1)|3717 (JAK2)|3911 (LAMA5)|39…
		EC	GO|GO.CC	GO:0005912	adherens junction	4.82751e-12	5.50144e-07	35	81 (ACTN4)|182 (JAG1)|301 (ANXA1)|302 (ANXA2)|308 (ANXA5)|682 (BSG)|857 (CAV1)|966 (CD59)|977 (CD151)|1003 (CDH5)|1495 (CTNNA1)|2022 (ENG)|2321 (FLT1)|2886 (GRB7)|3315 (HSPB1)|3339 (HSPG2)|3672 (ITGA1)|3688 (ITGB1)|3717 (JAK2)|3987 (LIMS1)|6237 (RRAS)|6282 (S100A11)|6645 (SNTB2)|7010 (TEK)|7041 (TGFB1I1)|7431 (VIM)|7525 (YES1)|8826 (IQGAP1)|10395 (DLC1)|10544 (PROCR)|26136 (TES)|29766 (TMOD3)|790…
		EC	GO|GO.BP	GO:0010631	epithelial cell migration	5.17584e-12	5.89839e-07	28	94 (ACVRL1)|285 (ANGPT2)|301 (ANXA1)|306 (ANXA3)|958 (CD40)|2050 (EPHB4)|2113 (ETS1)|2324 (FLT4)|2624 (GATA2)|3315 (HSPB1)|3688 (ITGB1)|4017 (LOXL2)|4846 (NOS3)|5175 (PECAM1)|5547 (PRCP)|7010 (TEK)|7424 (VEGFC)|10769 (PLK2)|11235 (PDCD10)|25865 (PRKD2)|29775 (CARD10)|29941 (PKN3)|54567 (DLL4)|56999 (ADAMTS9)|57381 (RHOJ)|79812 (MMRN2)|90627 (STARD13)|161198 (CLEC14A)
		EC	GO|GO.BP	GO:2000026	regulation of multicellular organismal development	5.76876e-12	6.57408e-07	77	32 (ACACB)|94 (ACVRL1)|182 (JAG1)|187 (APLNR)|285 (ANGPT2)|301 (ANXA1)|302 (ANXA2)|306 (ANXA3)|857 (CAV1)|947 (CD34)|958 (CD40)|1003 (CDH5)|1378 (CR1)|1495 (CTNNA1)|1848 (DUSP6)|2022 (ENG)|2113 (ETS1)|2296 (FOXC1)|2321 (FLT1)|2335 (FN1)|2624 (GATA2)|2828 (GPR4)|3315 (HSPB1)|3339 (HSPG2)|3665 (IRF7)|3688 (ITGB1)|3910 (LAMA4)|3911 (LAMA5)|4005 (LMO2)|4017 (LOXL2)|4256 (MGP)|4487 (MSX1)|4831 (NME2)|…
		EC	GO|GO.BP	GO:0030198	extracellular matrix organization	5.94277e-12	6.77238e-07	28	302 (ANXA2)|633 (BGN)|682 (BSG)|871 (SERPINH1)|1282 (COL4A1)|1842 (ECM2)|2022 (ENG)|2113 (ETS1)|2296 (FOXC1)|2335 (FN1)|3339 (HSPG2)|3384 (ICAM2)|3672 (ITGA1)|3688 (ITGB1)|3910 (LAMA4)|3911 (LAMA5)|3915 (LAMC1)|4017 (LOXL2)|4811 (NID1)|4982 (TNFRSF11B)|5175 (PECAM1)|7076 (TIMP1)|7448 (VTN)|7450 (VWF)|8174 (MADCAM1)|10516 (FBLN5)|56999 (ADAMTS9)|340267 (COL28A1)
		EC	GO|GO.BP	GO:0090132	epithelium migration	6.36545e-12	7.25407e-07	28	94 (ACVRL1)|285 (ANGPT2)|301 (ANXA1)|306 (ANXA3)|958 (CD40)|2050 (EPHB4)|2113 (ETS1)|2324 (FLT4)|2624 (GATA2)|3315 (HSPB1)|3688 (ITGB1)|4017 (LOXL2)|4846 (NOS3)|5175 (PECAM1)|5547 (PRCP)|7010 (TEK)|7424 (VEGFC)|10769 (PLK2)|11235 (PDCD10)|25865 (PRKD2)|29775 (CARD10)|29941 (PKN3)|54567 (DLL4)|56999 (ADAMTS9)|57381 (RHOJ)|79812 (MMRN2)|90627 (STARD13)|161198 (CLEC14A)
		EC	GO|GO.BP	GO:0007154	cell communication	6.58185e-12	7.50068e-07	168	81 (ACTN4)|94 (ACVRL1)|182 (JAG1)|187 (APLNR)|285 (ANGPT2)|301 (ANXA1)|302 (ANXA2)|306 (ANXA3)|308 (ANXA5)|389 (RHOC)|682 (BSG)|857 (CAV1)|947 (CD34)|958 (CD40)|966 (CD59)|977 (CD151)|1003 (CDH5)|1030 (CDKN2B)|1258 (CNGB1)|1282 (COL4A1)|1378 (CR1)|1390 (CREM)|1495 (CTNNA1)|1604 (CD55)|1848 (DUSP6)|1997 (ELF1)|2022 (ENG)|2050 (EPHB4)|2078 (ERG)|2122 (MECOM)|2296 (FOXC1)|2321 (FLT1)|2324 (FLT4)|233…
		EC	GO|GO.BP	GO:0001667	ameboidal-type cell migration	6.72048e-12	7.65866e-07	32	94 (ACVRL1)|285 (ANGPT2)|301 (ANXA1)|306 (ANXA3)|958 (CD40)|2050 (EPHB4)|2113 (ETS1)|2324 (FLT4)|2624 (GATA2)|3315 (HSPB1)|3688 (ITGB1)|3911 (LAMA5)|4017 (LOXL2)|4846 (NOS3)|5175 (PECAM1)|5547 (PRCP)|5979 (RET)|7010 (TEK)|7076 (TIMP1)|7424 (VEGFC)|10769 (PLK2)|11235 (PDCD10)|25865 (PRKD2)|29775 (CARD10)|29941 (PKN3)|54567 (DLL4)|56999 (ADAMTS9)|57381 (RHOJ)|64321 (SOX17)|79812 (MMRN2)|90627 (STAR…
		EC	GO|GO.BP	GO:0043062	extracellular structure organization	6.82554e-12	7.77838e-07	30	302 (ANXA2)|633 (BGN)|682 (BSG)|871 (SERPINH1)|947 (CD34)|1282 (COL4A1)|1842 (ECM2)|2022 (ENG)|2113 (ETS1)|2296 (FOXC1)|2335 (FN1)|3339 (HSPG2)|3384 (ICAM2)|3672 (ITGA1)|3688 (ITGB1)|3910 (LAMA4)|3911 (LAMA5)|3915 (LAMC1)|4017 (LOXL2)|4811 (NID1)|4982 (TNFRSF11B)|5175 (PECAM1)|5360 (PLTP)|7076 (TIMP1)|7448 (VTN)|7450 (VWF)|8174 (MADCAM1)|10516 (FBLN5)|56999 (ADAMTS9)|340267 (COL28A1)
		EC	GO|GO.BP	GO:0042060	wound healing	7.33324e-12	8.35697e-07	35	94 (ACVRL1)|301 (ANXA1)|302 (ANXA2)|308 (ANXA5)|389 (RHOC)|857 (CAV1)|947 (CD34)|958 (CD40)|966 (CD59)|977 (CD151)|2113 (ETS1)|2335 (FN1)|2624 (GATA2)|2828 (GPR4)|3315 (HSPB1)|3717 (JAK2)|4846 (NOS3)|5175 (PECAM1)|5265 (SERPINA1)|5547 (PRCP)|5583 (PRKCH)|7035 (TFPI)|7056 (THBD)|7076 (TIMP1)|7448 (VTN)|7450 (VWF)|8323 (FZD6)|10544 (PROCR)|11235 (PDCD10)|22915 (MMRN1)|26509 (MYOF)|30846 (EHD2)|8102…
		EC	GO|GO.MF	GO:0005515	protein binding	8.47326e-12	9.65613e-07	253	32 (ACACB)|81 (ACTN4)|94 (ACVRL1)|182 (JAG1)|285 (ANGPT2)|301 (ANXA1)|302 (ANXA2)|306 (ANXA3)|308 (ANXA5)|389 (RHOC)|663 (BNIP2)|682 (BSG)|689 (BTF3)|822 (CAPG)|831 (CAST)|839 (CASP6)|840 (CASP7)|857 (CAV1)|871 (SERPINH1)|947 (CD34)|958 (CD40)|966 (CD59)|977 (CD151)|1003 (CDH5)|1030 (CDKN2B)|1033 (CDKN3)|1163 (CKS1B)|1258 (CNGB1)|1282 (COL4A1)|1317 (SLC31A1)|1378 (CR1)|1390 (CREM)|1495 (CTNNA1)|1…
		EC	GO|GO.BP	GO:0090130	tissue migration	9.5635e-12	1.08986e-06	28	94 (ACVRL1)|285 (ANGPT2)|301 (ANXA1)|306 (ANXA3)|958 (CD40)|2050 (EPHB4)|2113 (ETS1)|2324 (FLT4)|2624 (GATA2)|3315 (HSPB1)|3688 (ITGB1)|4017 (LOXL2)|4846 (NOS3)|5175 (PECAM1)|5547 (PRCP)|7010 (TEK)|7424 (VEGFC)|10769 (PLK2)|11235 (PDCD10)|25865 (PRKD2)|29775 (CARD10)|29941 (PKN3)|54567 (DLL4)|56999 (ADAMTS9)|57381 (RHOJ)|79812 (MMRN2)|90627 (STARD13)|161198 (CLEC14A)
		EC	GO|GO.BP	GO:0030335	positive regulation of cell migration	9.56628e-12	1.09017e-06	34	81 (ACTN4)|301 (ANXA1)|306 (ANXA3)|389 (RHOC)|857 (CAV1)|958 (CD40)|977 (CD151)|2113 (ETS1)|2321 (FLT1)|2324 (FLT4)|2335 (FN1)|2624 (GATA2)|2886 (GRB7)|3315 (HSPB1)|3480 (IGF1R)|3554 (IL1R1)|3717 (JAK2)|4846 (NOS3)|5420 (PODXL)|5979 (RET)|6591 (SNAI2)|7010 (TEK)|7074 (TIAM1)|7424 (VEGFC)|7448 (VTN)|8174 (MADCAM1)|8826 (IQGAP1)|10769 (PLK2)|11235 (PDCD10)|25865 (PRKD2)|29984 (RHOD)|51176 (LEF1)|57…
		EC	GO|GO.CC	GO:0070161	anchoring junction	1.10493e-11	1.25918e-06	35	81 (ACTN4)|182 (JAG1)|301 (ANXA1)|302 (ANXA2)|308 (ANXA5)|682 (BSG)|857 (CAV1)|966 (CD59)|977 (CD151)|1003 (CDH5)|1495 (CTNNA1)|2022 (ENG)|2321 (FLT1)|2886 (GRB7)|3315 (HSPB1)|3339 (HSPG2)|3672 (ITGA1)|3688 (ITGB1)|3717 (JAK2)|3987 (LIMS1)|6237 (RRAS)|6282 (S100A11)|6645 (SNTB2)|7010 (TEK)|7041 (TGFB1I1)|7431 (VIM)|7525 (YES1)|8826 (IQGAP1)|10395 (DLC1)|10544 (PROCR)|26136 (TES)|29766 (TMOD3)|790…
		EC	GO|GO.BP	GO:0010594	regulation of endothelial cell migration	2.11044e-11	2.40505e-06	22	94 (ACVRL1)|285 (ANGPT2)|301 (ANXA1)|306 (ANXA3)|958 (CD40)|2113 (ETS1)|2324 (FLT4)|2624 (GATA2)|3315 (HSPB1)|4846 (NOS3)|5547 (PRCP)|7010 (TEK)|7424 (VEGFC)|10769 (PLK2)|11235 (PDCD10)|25865 (PRKD2)|29775 (CARD10)|54567 (DLL4)|56999 (ADAMTS9)|57381 (RHOJ)|79812 (MMRN2)|90627 (STARD13)
		EC	GO|GO.BP	GO:0051094	positive regulation of developmental process	2.29125e-11	2.61111e-06	59	32 (ACACB)|94 (ACVRL1)|182 (JAG1)|187 (APLNR)|285 (ANGPT2)|301 (ANXA1)|302 (ANXA2)|306 (ANXA3)|663 (BNIP2)|947 (CD34)|958 (CD40)|1003 (CDH5)|1495 (CTNNA1)|2022 (ENG)|2113 (ETS1)|2296 (FOXC1)|2321 (FLT1)|2335 (FN1)|2624 (GATA2)|3315 (HSPB1)|3356 (HTR2A)|3688 (ITGB1)|3717 (JAK2)|3987 (LIMS1)|4017 (LOXL2)|4831 (NME2)|4846 (NOS3)|5583 (PRKCH)|5979 (RET)|6237 (RRAS)|6591 (SNAI2)|6788 (STK3)|6909 (TBX2…
		EC	GO|GO.BP	GO:2000147	positive regulation of cell motility	2.68141e-11	3.05573e-06	34	81 (ACTN4)|301 (ANXA1)|306 (ANXA3)|389 (RHOC)|857 (CAV1)|958 (CD40)|977 (CD151)|2113 (ETS1)|2321 (FLT1)|2324 (FLT4)|2335 (FN1)|2624 (GATA2)|2886 (GRB7)|3315 (HSPB1)|3480 (IGF1R)|3554 (IL1R1)|3717 (JAK2)|4846 (NOS3)|5420 (PODXL)|5979 (RET)|6591 (SNAI2)|7010 (TEK)|7074 (TIAM1)|7424 (VEGFC)|7448 (VTN)|8174 (MADCAM1)|8826 (IQGAP1)|10769 (PLK2)|11235 (PDCD10)|25865 (PRKD2)|29984 (RHOD)|51176 (LEF1)|57…
		EC	GO|GO.BP	GO:0042127	regulation of cell proliferation	2.87173e-11	3.27262e-06	66	94 (ACVRL1)|182 (JAG1)|187 (APLNR)|301 (ANXA1)|302 (ANXA2)|857 (CAV1)|958 (CD40)|1030 (CDKN2B)|1033 (CDKN3)|1495 (CTNNA1)|1604 (CD55)|2113 (ETS1)|2321 (FLT1)|2324 (FLT4)|2335 (FN1)|2615 (LRRC32)|2624 (GATA2)|3356 (HTR2A)|3480 (IGF1R)|3490 (IGFBP7)|3672 (ITGA1)|3688 (ITGB1)|3717 (JAK2)|3911 (LAMA5)|3915 (LAMC1)|4091 (SMAD6)|4487 (MSX1)|4831 (NME2)|4846 (NOS3)|4881 (NPR1)|4953 (ODC1)|5583 (PRKCH)|6…
		EC	GO|GO.CC	GO:0005604	basement membrane	2.94079e-11	3.35133e-06	15	302 (ANXA2)|977 (CD151)|1282 (COL4A1)|2335 (FN1)|3339 (HSPG2)|3910 (LAMA4)|3911 (LAMA5)|3915 (LAMC1)|4017 (LOXL2)|4811 (NID1)|7076 (TIMP1)|7448 (VTN)|79812 (MMRN2)|83872 (HMCN1)|340267 (COL28A1)
		EC	GO|GO.BP	GO:0007165	signal transduction	2.96862e-11	3.38304e-06	157	81 (ACTN4)|94 (ACVRL1)|182 (JAG1)|187 (APLNR)|285 (ANGPT2)|301 (ANXA1)|302 (ANXA2)|306 (ANXA3)|308 (ANXA5)|389 (RHOC)|682 (BSG)|857 (CAV1)|947 (CD34)|958 (CD40)|966 (CD59)|977 (CD151)|1003 (CDH5)|1030 (CDKN2B)|1258 (CNGB1)|1282 (COL4A1)|1378 (CR1)|1390 (CREM)|1495 (CTNNA1)|1604 (CD55)|1848 (DUSP6)|1997 (ELF1)|2022 (ENG)|2050 (EPHB4)|2078 (ERG)|2122 (MECOM)|2296 (FOXC1)|2321 (FLT1)|2324 (FLT4)|233…
		EC	GO|GO.BP	GO:1904018	positive regulation of vasculature development	3.57144e-11	4.07002e-06	22	94 (ACVRL1)|187 (APLNR)|285 (ANGPT2)|301 (ANXA1)|306 (ANXA3)|947 (CD34)|958 (CD40)|1003 (CDH5)|2022 (ENG)|2113 (ETS1)|2321 (FLT1)|2624 (GATA2)|3315 (HSPB1)|3688 (ITGB1)|4846 (NOS3)|6237 (RRAS)|7010 (TEK)|7424 (VEGFC)|10769 (PLK2)|25865 (PRKD2)|51129 (ANGPTL4)|57381 (RHOJ)
		EC	GO|GO.BP	GO:0071310	cellular response to organic substance	5.08657e-11	5.79666e-06	87	94 (ACVRL1)|285 (ANGPT2)|301 (ANXA1)|302 (ANXA2)|308 (ANXA5)|839 (CASP6)|840 (CASP7)|857 (CAV1)|958 (CD40)|1003 (CDH5)|1030 (CDKN2B)|1282 (COL4A1)|1495 (CTNNA1)|1604 (CD55)|1997 (ELF1)|2022 (ENG)|2296 (FOXC1)|2321 (FLT1)|2324 (FLT4)|2335 (FN1)|2615 (LRRC32)|2634 (GBP2)|2826 (CCR10)|3315 (HSPB1)|3454 (IFNAR1)|3480 (IGF1R)|3490 (IGFBP7)|3554 (IL1R1)|3665 (IRF7)|3688 (ITGB1)|3717 (JAK2)|3784 (KCNQ1)…
		EC	GO|GO.CC	GO:0045121	membrane raft	5.26845e-11	6.00392e-06	25	302 (ANXA2)|682 (BSG)|857 (CAV1)|871 (SERPINH1)|1495 (CTNNA1)|1604 (CD55)|3356 (HTR2A)|3672 (ITGA1)|3688 (ITGB1)|3717 (JAK2)|3784 (KCNQ1)|4846 (NOS3)|5175 (PECAM1)|5420 (PODXL)|5979 (RET)|6513 (SLC2A1)|7010 (TEK)|7035 (TFPI)|8737 (RIPK1)|8826 (IQGAP1)|10008 (KCNE3)|10395 (DLC1)|26509 (MYOF)|30846 (EHD2)|79026 (AHNAK)
		EC	GO|GO.BP	GO:0051272	positive regulation of cellular component movement	5.35377e-11	6.10116e-06	34	81 (ACTN4)|301 (ANXA1)|306 (ANXA3)|389 (RHOC)|857 (CAV1)|958 (CD40)|977 (CD151)|2113 (ETS1)|2321 (FLT1)|2324 (FLT4)|2335 (FN1)|2624 (GATA2)|2886 (GRB7)|3315 (HSPB1)|3480 (IGF1R)|3554 (IL1R1)|3717 (JAK2)|4846 (NOS3)|5420 (PODXL)|5979 (RET)|6591 (SNAI2)|7010 (TEK)|7074 (TIAM1)|7424 (VEGFC)|7448 (VTN)|8174 (MADCAM1)|8826 (IQGAP1)|10769 (PLK2)|11235 (PDCD10)|25865 (PRKD2)|29984 (RHOD)|51176 (LEF1)|57…
		EC	GO|GO.BP	GO:0002040	sprouting angiogenesis	5.35474e-11	6.10227e-06	20	94 (ACVRL1)|187 (APLNR)|301 (ANXA1)|2050 (EPHB4)|2324 (FLT4)|2624 (GATA2)|3688 (ITGB1)|4017 (LOXL2)|7010 (TEK)|7424 (VEGFC)|10769 (PLK2)|11235 (PDCD10)|29775 (CARD10)|51176 (LEF1)|54567 (DLL4)|56999 (ADAMTS9)|57381 (RHOJ)|79812 (MMRN2)|90627 (STARD13)|161198 (CLEC14A)
		EC	GO|GO.BP	GO:0007275	multicellular organism development	5.53289e-11	6.30528e-06	143	32 (ACACB)|94 (ACVRL1)|182 (JAG1)|187 (APLNR)|285 (ANGPT2)|301 (ANXA1)|302 (ANXA2)|306 (ANXA3)|682 (BSG)|857 (CAV1)|871 (SERPINH1)|947 (CD34)|958 (CD40)|1003 (CDH5)|1030 (CDKN2B)|1258 (CNGB1)|1282 (COL4A1)|1349 (COX7B)|1378 (CR1)|1390 (CREM)|1495 (CTNNA1)|1848 (DUSP6)|1879 (EBF1)|1889 (ECE1)|2012 (EMP1)|2022 (ENG)|2050 (EPHB4)|2078 (ERG)|2113 (ETS1)|2122 (MECOM)|2296 (FOXC1)|2313 (FLI1)|2321 (FLT…
		EC	GO|GO.CC	GO:0098857	membrane microdomain	5.65362e-11	6.44286e-06	25	302 (ANXA2)|682 (BSG)|857 (CAV1)|871 (SERPINH1)|1495 (CTNNA1)|1604 (CD55)|3356 (HTR2A)|3672 (ITGA1)|3688 (ITGB1)|3717 (JAK2)|3784 (KCNQ1)|4846 (NOS3)|5175 (PECAM1)|5420 (PODXL)|5979 (RET)|6513 (SLC2A1)|7010 (TEK)|7035 (TFPI)|8737 (RIPK1)|8826 (IQGAP1)|10008 (KCNE3)|10395 (DLC1)|26509 (MYOF)|30846 (EHD2)|79026 (AHNAK)
		EC	GO|GO.BP	GO:0048731	system development	7.76996e-11	8.85464e-06	132	32 (ACACB)|94 (ACVRL1)|182 (JAG1)|187 (APLNR)|285 (ANGPT2)|301 (ANXA1)|302 (ANXA2)|306 (ANXA3)|682 (BSG)|857 (CAV1)|871 (SERPINH1)|947 (CD34)|958 (CD40)|1003 (CDH5)|1030 (CDKN2B)|1258 (CNGB1)|1282 (COL4A1)|1349 (COX7B)|1378 (CR1)|1495 (CTNNA1)|1848 (DUSP6)|1889 (ECE1)|2022 (ENG)|2050 (EPHB4)|2113 (ETS1)|2122 (MECOM)|2296 (FOXC1)|2313 (FLI1)|2321 (FLT1)|2324 (FLT4)|2335 (FN1)|2624 (GATA2)|2701 (GJ…
		EC	GO|GO.BP	GO:0009611	response to wounding	8.16953e-11	9.31e-06	37	94 (ACVRL1)|301 (ANXA1)|302 (ANXA2)|308 (ANXA5)|389 (RHOC)|857 (CAV1)|947 (CD34)|958 (CD40)|966 (CD59)|977 (CD151)|1495 (CTNNA1)|2113 (ETS1)|2335 (FN1)|2624 (GATA2)|2828 (GPR4)|3315 (HSPB1)|3717 (JAK2)|4846 (NOS3)|5175 (PECAM1)|5265 (SERPINA1)|5547 (PRCP)|5583 (PRKCH)|7035 (TFPI)|7056 (THBD)|7076 (TIMP1)|7448 (VTN)|7450 (VWF)|8323 (FZD6)|8578 (SCARF1)|10544 (PROCR)|11235 (PDCD10)|22915 (MMRN1)|26…
		EC	GO|GO.BP	GO:0034330	cell junction organization	9.16582e-11	1.04454e-05	24	81 (ACTN4)|94 (ACVRL1)|389 (RHOC)|857 (CAV1)|977 (CD151)|1003 (CDH5)|1495 (CTNNA1)|2335 (FN1)|2701 (GJA4)|2702 (GJA5)|3911 (LAMA5)|3915 (LAMC1)|3987 (LIMS1)|5583 (PRKCH)|6591 (SNAI2)|7010 (TEK)|7122 (CLDN5)|8826 (IQGAP1)|10395 (DLC1)|29984 (RHOD)|51599 (LSR)|57493 (HEG1)|153562 (MARVELD2)|100506658 (OCLN)
		EC	GO|GO.BP	GO:0042221	response to chemical	9.18278e-11	1.04647e-05	129	32 (ACACB)|94 (ACVRL1)|182 (JAG1)|285 (ANGPT2)|301 (ANXA1)|302 (ANXA2)|306 (ANXA3)|308 (ANXA5)|368 (ABCC6)|682 (BSG)|839 (CASP6)|840 (CASP7)|857 (CAV1)|871 (SERPINH1)|947 (CD34)|958 (CD40)|1003 (CDH5)|1030 (CDKN2B)|1282 (COL4A1)|1317 (SLC31A1)|1495 (CTNNA1)|1604 (CD55)|1848 (DUSP6)|1997 (ELF1)|2022 (ENG)|2113 (ETS1)|2296 (FOXC1)|2321 (FLT1)|2324 (FLT4)|2335 (FN1)|2615 (LRRC32)|2624 (GATA2)|2634 (…
		EC	GO|GO.MF	GO:0005201	extracellular matrix structural constituent	1.0709e-10	1.2204e-05	18	633 (BGN)|1282 (COL4A1)|2335 (FN1)|3339 (HSPG2)|3490 (IGFBP7)|3910 (LAMA4)|3911 (LAMA5)|3915 (LAMC1)|4256 (MGP)|4811 (NID1)|7448 (VTN)|7450 (VWF)|10516 (FBLN5)|22915 (MMRN1)|64129 (TINAGL1)|79812 (MMRN2)|83872 (HMCN1)|340267 (COL28A1)
		EC	GO|GO.BP	GO:0040017	positive regulation of locomotion	1.20163e-10	1.36938e-05	34	81 (ACTN4)|301 (ANXA1)|306 (ANXA3)|389 (RHOC)|857 (CAV1)|958 (CD40)|977 (CD151)|2113 (ETS1)|2321 (FLT1)|2324 (FLT4)|2335 (FN1)|2624 (GATA2)|2886 (GRB7)|3315 (HSPB1)|3480 (IGF1R)|3554 (IL1R1)|3717 (JAK2)|4846 (NOS3)|5420 (PODXL)|5979 (RET)|6591 (SNAI2)|7010 (TEK)|7074 (TIAM1)|7424 (VEGFC)|7448 (VTN)|8174 (MADCAM1)|8826 (IQGAP1)|10769 (PLK2)|11235 (PDCD10)|25865 (PRKD2)|29984 (RHOD)|51176 (LEF1)|57…
		EC	GO|GO.CC	GO:0098589	membrane region	1.20565e-10	1.37396e-05	25	302 (ANXA2)|682 (BSG)|857 (CAV1)|871 (SERPINH1)|1495 (CTNNA1)|1604 (CD55)|3356 (HTR2A)|3672 (ITGA1)|3688 (ITGB1)|3717 (JAK2)|3784 (KCNQ1)|4846 (NOS3)|5175 (PECAM1)|5420 (PODXL)|5979 (RET)|6513 (SLC2A1)|7010 (TEK)|7035 (TFPI)|8737 (RIPK1)|8826 (IQGAP1)|10008 (KCNE3)|10395 (DLC1)|26509 (MYOF)|30846 (EHD2)|79026 (AHNAK)
		EC	GO|GO.BP	GO:0043535	regulation of blood vessel endothelial cell migration	1.47534e-10	1.6813e-05	18	94 (ACVRL1)|285 (ANGPT2)|301 (ANXA1)|958 (CD40)|2113 (ETS1)|2624 (GATA2)|3315 (HSPB1)|4846 (NOS3)|5547 (PRCP)|7424 (VEGFC)|10769 (PLK2)|11235 (PDCD10)|25865 (PRKD2)|29775 (CARD10)|54567 (DLL4)|57381 (RHOJ)|79812 (MMRN2)|90627 (STARD13)
		EC	GO|GO.CC	GO:0005925	focal adhesion	1.75644e-10	2.00164e-05	28	81 (ACTN4)|301 (ANXA1)|308 (ANXA5)|682 (BSG)|857 (CAV1)|966 (CD59)|977 (CD151)|1495 (CTNNA1)|2022 (ENG)|2321 (FLT1)|2886 (GRB7)|3315 (HSPB1)|3339 (HSPG2)|3672 (ITGA1)|3688 (ITGB1)|3717 (JAK2)|3987 (LIMS1)|6237 (RRAS)|6645 (SNTB2)|7010 (TEK)|7041 (TGFB1I1)|7431 (VIM)|7525 (YES1)|8826 (IQGAP1)|10395 (DLC1)|10544 (PROCR)|26136 (TES)|79026 (AHNAK)
		EC	GO|GO.BP	GO:0032501	multicellular organismal process	1.96932e-10	2.24424e-05	181	32 (ACACB)|94 (ACVRL1)|182 (JAG1)|187 (APLNR)|285 (ANGPT2)|301 (ANXA1)|302 (ANXA2)|306 (ANXA3)|308 (ANXA5)|368 (ABCC6)|633 (BGN)|682 (BSG)|857 (CAV1)|871 (SERPINH1)|947 (CD34)|958 (CD40)|966 (CD59)|1003 (CDH5)|1030 (CDKN2B)|1258 (CNGB1)|1282 (COL4A1)|1349 (COX7B)|1378 (CR1)|1390 (CREM)|1495 (CTNNA1)|1604 (CD55)|1848 (DUSP6)|1879 (EBF1)|1889 (ECE1)|1997 (ELF1)|2012 (EMP1)|2022 (ENG)|2050 (EPHB4)|2…
		EC	GO|GO.BP	GO:0048729	tissue morphogenesis	1.97255e-10	2.24792e-05	35	94 (ACVRL1)|182 (JAG1)|389 (RHOC)|977 (CD151)|1282 (COL4A1)|2022 (ENG)|2296 (FOXC1)|3688 (ITGB1)|3911 (LAMA5)|4487 (MSX1)|4846 (NOS3)|5420 (PODXL)|5979 (RET)|6591 (SNAI2)|6788 (STK3)|6909 (TBX2)|6926 (TBX3)|7041 (TGFB1I1)|7049 (TGFBR3)|7074 (TIAM1)|7424 (VEGFC)|7547 (ZIC3)|8322 (FZD4)|8323 (FZD6)|8463 (TEAD2)|10395 (DLC1)|11235 (PDCD10)|25865 (PRKD2)|51176 (LEF1)|54567 (DLL4)|57493 (HEG1)|64321 (…
		EC	GO|GO.CC	GO:0005924	cell-substrate adherens junction	2.08329e-10	2.37412e-05	28	81 (ACTN4)|301 (ANXA1)|308 (ANXA5)|682 (BSG)|857 (CAV1)|966 (CD59)|977 (CD151)|1495 (CTNNA1)|2022 (ENG)|2321 (FLT1)|2886 (GRB7)|3315 (HSPB1)|3339 (HSPG2)|3672 (ITGA1)|3688 (ITGB1)|3717 (JAK2)|3987 (LIMS1)|6237 (RRAS)|6645 (SNTB2)|7010 (TEK)|7041 (TGFB1I1)|7431 (VIM)|7525 (YES1)|8826 (IQGAP1)|10395 (DLC1)|10544 (PROCR)|26136 (TES)|79026 (AHNAK)
		EC	GO|GO.BP	GO:0032835	glomerulus development	2.40676e-10	2.74274e-05	12	182 (JAG1)|285 (ANGPT2)|947 (CD34)|2296 (FOXC1)|2828 (GPR4)|4811 (NID1)|5175 (PECAM1)|5420 (PODXL)|5979 (RET)|7010 (TEK)|8826 (IQGAP1)|25937 (WWTR1)
		EC	GO|GO.CC	GO:0030055	cell-substrate junction	2.60893e-10	2.97313e-05	28	81 (ACTN4)|301 (ANXA1)|308 (ANXA5)|682 (BSG)|857 (CAV1)|966 (CD59)|977 (CD151)|1495 (CTNNA1)|2022 (ENG)|2321 (FLT1)|2886 (GRB7)|3315 (HSPB1)|3339 (HSPG2)|3672 (ITGA1)|3688 (ITGB1)|3717 (JAK2)|3987 (LIMS1)|6237 (RRAS)|6645 (SNTB2)|7010 (TEK)|7041 (TGFB1I1)|7431 (VIM)|7525 (YES1)|8826 (IQGAP1)|10395 (DLC1)|10544 (PROCR)|26136 (TES)|79026 (AHNAK)
		EC	GO|GO.CC	GO:0009986	cell surface	3.67369e-10	4.18654e-05	42	94 (ACVRL1)|301 (ANXA1)|302 (ANXA2)|308 (ANXA5)|633 (BGN)|947 (CD34)|958 (CD40)|966 (CD59)|977 (CD151)|1003 (CDH5)|1378 (CR1)|1604 (CD55)|1889 (ECE1)|2022 (ENG)|2615 (LRRC32)|2826 (CCR10)|3554 (IL1R1)|3672 (ITGA1)|3688 (ITGB1)|3953 (LEPR)|4059 (BCAM)|5175 (PECAM1)|5243 (ABCB1)|7010 (TEK)|7035 (TFPI)|7049 (TGFBR3)|7056 (THBD)|8322 (FZD4)|8323 (FZD6)|9180 (OSMR)|9466 (IL27RA)|10544 (PROCR)|22918 (C…
		EC	GO|GO.BP	GO:0032879	regulation of localization	3.96793e-10	4.52186e-05	88	32 (ACACB)|81 (ACTN4)|94 (ACVRL1)|182 (JAG1)|187 (APLNR)|285 (ANGPT2)|301 (ANXA1)|302 (ANXA2)|306 (ANXA3)|308 (ANXA5)|389 (RHOC)|857 (CAV1)|947 (CD34)|958 (CD40)|977 (CD151)|1495 (CTNNA1)|2022 (ENG)|2113 (ETS1)|2321 (FLT1)|2324 (FLT4)|2335 (FN1)|2615 (LRRC32)|2624 (GATA2)|2702 (GJA5)|2886 (GRB7)|3315 (HSPB1)|3356 (HTR2A)|3480 (IGF1R)|3554 (IL1R1)|3688 (ITGB1)|3717 (JAK2)|3764 (KCNJ8)|3784 (KCNQ1)…
		EC	GO|GO.CC	GO:0030054	cell junction	4.17674e-10	4.75982e-05	53	81 (ACTN4)|182 (JAG1)|301 (ANXA1)|302 (ANXA2)|308 (ANXA5)|682 (BSG)|857 (CAV1)|966 (CD59)|977 (CD151)|1003 (CDH5)|1495 (CTNNA1)|2022 (ENG)|2321 (FLT1)|2701 (GJA4)|2702 (GJA5)|2886 (GRB7)|3315 (HSPB1)|3339 (HSPG2)|3672 (ITGA1)|3688 (ITGB1)|3717 (JAK2)|3987 (LIMS1)|5175 (PECAM1)|5420 (PODXL)|6002 (RGS12)|6237 (RRAS)|6282 (S100A11)|6513 (SLC2A1)|6645 (SNTB2)|7010 (TEK)|7041 (TGFB1I1)|7074 (TIAM1)|71…
		EC	GO|GO.BP	GO:0051240	positive regulation of multicellular organismal process	4.96157e-10	5.65421e-05	65	32 (ACACB)|94 (ACVRL1)|182 (JAG1)|187 (APLNR)|285 (ANGPT2)|301 (ANXA1)|302 (ANXA2)|306 (ANXA3)|857 (CAV1)|947 (CD34)|958 (CD40)|1003 (CDH5)|2022 (ENG)|2113 (ETS1)|2296 (FOXC1)|2321 (FLT1)|2324 (FLT4)|2335 (FN1)|2624 (GATA2)|2702 (GJA5)|3315 (HSPB1)|3356 (HTR2A)|3480 (IGF1R)|3554 (IL1R1)|3665 (IRF7)|3688 (ITGB1)|3717 (JAK2)|3784 (KCNQ1)|3953 (LEPR)|4017 (LOXL2)|4831 (NME2)|4846 (NOS3)|4881 (NPR1)|…
		EC	GO|GO.BP	GO:0048523	negative regulation of cellular process	5.19138e-10	5.9161e-05	129	32 (ACACB)|81 (ACTN4)|94 (ACVRL1)|182 (JAG1)|187 (APLNR)|285 (ANGPT2)|301 (ANXA1)|302 (ANXA2)|308 (ANXA5)|663 (BNIP2)|822 (CAPG)|831 (CAST)|857 (CAV1)|871 (SERPINH1)|947 (CD34)|966 (CD59)|1030 (CDKN2B)|1033 (CDKN3)|1378 (CR1)|1390 (CREM)|1495 (CTNNA1)|1604 (CD55)|1848 (DUSP6)|1997 (ELF1)|2022 (ENG)|2050 (EPHB4)|2113 (ETS1)|2122 (MECOM)|2296 (FOXC1)|2321 (FLT1)|2324 (FLT4)|2335 (FN1)|2615 (LRRC32)…
		EC	GO|GO.CC	GO:0070062	extracellular exosome	7.48667e-10	8.53181e-05	74	81 (ACTN4)|301 (ANXA1)|302 (ANXA2)|306 (ANXA3)|308 (ANXA5)|389 (RHOC)|633 (BGN)|682 (BSG)|822 (CAPG)|958 (CD40)|966 (CD59)|1378 (CR1)|1604 (CD55)|1889 (ECE1)|2050 (EPHB4)|2335 (FN1)|2632 (GBE1)|3251 (HPRT1)|3315 (HSPB1)|3339 (HSPG2)|3426 (CFI)|3490 (IGFBP7)|3672 (ITGA1)|3688 (ITGB1)|3910 (LAMA4)|3911 (LAMA5)|3915 (LAMC1)|4059 (BCAM)|4256 (MGP)|4811 (NID1)|4831 (NME2)|5175 (PECAM1)|5243 (ABCB1)|52…
		EC	GO|GO.BP	GO:0048869	cellular developmental process	8.25921e-10	9.4122e-05	119	81 (ACTN4)|94 (ACVRL1)|182 (JAG1)|187 (APLNR)|285 (ANGPT2)|301 (ANXA1)|302 (ANXA2)|389 (RHOC)|663 (BNIP2)|682 (BSG)|839 (CASP6)|857 (CAV1)|871 (SERPINH1)|947 (CD34)|1003 (CDH5)|1030 (CDKN2B)|1258 (CNGB1)|1282 (COL4A1)|1378 (CR1)|1390 (CREM)|1495 (CTNNA1)|1848 (DUSP6)|1997 (ELF1)|2022 (ENG)|2050 (EPHB4)|2078 (ERG)|2113 (ETS1)|2122 (MECOM)|2296 (FOXC1)|2313 (FLI1)|2321 (FLT1)|2324 (FLT4)|2335 (FN1)…
		EC	GO|GO.BP	GO:0048585	negative regulation of response to stimulus	8.87956e-10	0.000101191	61	187 (APLNR)|285 (ANGPT2)|301 (ANXA1)|302 (ANXA2)|308 (ANXA5)|857 (CAV1)|947 (CD34)|966 (CD59)|1003 (CDH5)|1378 (CR1)|1495 (CTNNA1)|1604 (CD55)|1848 (DUSP6)|1997 (ELF1)|2050 (EPHB4)|2113 (ETS1)|2122 (MECOM)|2321 (FLT1)|2324 (FLT4)|2624 (GATA2)|3090 (HIC1)|3315 (HSPB1)|3480 (IGF1R)|3672 (ITGA1)|3688 (ITGB1)|4091 (SMAD6)|4846 (NOS3)|5272 (SERPINB9)|5979 (RET)|6002 (RGS12)|6591 (SNAI2)|6788 (STK3)|70…
		EC	GO|GO.BP	GO:0048519	negative regulation of biological process	9.70874e-10	0.000110641	146	32 (ACACB)|81 (ACTN4)|94 (ACVRL1)|182 (JAG1)|187 (APLNR)|285 (ANGPT2)|301 (ANXA1)|302 (ANXA2)|308 (ANXA5)|663 (BNIP2)|822 (CAPG)|831 (CAST)|857 (CAV1)|871 (SERPINH1)|947 (CD34)|966 (CD59)|1003 (CDH5)|1030 (CDKN2B)|1033 (CDKN3)|1378 (CR1)|1390 (CREM)|1495 (CTNNA1)|1604 (CD55)|1848 (DUSP6)|1997 (ELF1)|2022 (ENG)|2050 (EPHB4)|2113 (ETS1)|2122 (MECOM)|2296 (FOXC1)|2321 (FLT1)|2324 (FLT4)|2335 (FN1)|2…
		EC	GO|GO.CC	GO:1903561	extracellular vesicle	1.17661e-09	0.000134086	74	81 (ACTN4)|301 (ANXA1)|302 (ANXA2)|306 (ANXA3)|308 (ANXA5)|389 (RHOC)|633 (BGN)|682 (BSG)|822 (CAPG)|958 (CD40)|966 (CD59)|1378 (CR1)|1604 (CD55)|1889 (ECE1)|2050 (EPHB4)|2335 (FN1)|2632 (GBE1)|3251 (HPRT1)|3315 (HSPB1)|3339 (HSPG2)|3426 (CFI)|3490 (IGFBP7)|3672 (ITGA1)|3688 (ITGB1)|3910 (LAMA4)|3911 (LAMA5)|3915 (LAMC1)|4059 (BCAM)|4256 (MGP)|4811 (NID1)|4831 (NME2)|5175 (PECAM1)|5243 (ABCB1)|52…
		EC	GO|GO.CC	GO:0005737	cytoplasm	1.21266e-09	0.000138195	244	32 (ACACB)|81 (ACTN4)|125 (ADH1B)|301 (ANXA1)|302 (ANXA2)|306 (ANXA3)|308 (ANXA5)|368 (ABCC6)|389 (RHOC)|633 (BGN)|663 (BNIP2)|682 (BSG)|689 (BTF3)|822 (CAPG)|831 (CAST)|839 (CASP6)|840 (CASP7)|857 (CAV1)|871 (SERPINH1)|947 (CD34)|958 (CD40)|966 (CD59)|977 (CD151)|1030 (CDKN2B)|1033 (CDKN3)|1258 (CNGB1)|1282 (COL4A1)|1317 (SLC31A1)|1349 (COX7B)|1378 (CR1)|1390 (CREM)|1495 (CTNNA1)|1604 (CD55)|184…
		EC	GO|GO.CC	GO:0043230	extracellular organelle	1.22547e-09	0.000139655	74	81 (ACTN4)|301 (ANXA1)|302 (ANXA2)|306 (ANXA3)|308 (ANXA5)|389 (RHOC)|633 (BGN)|682 (BSG)|822 (CAPG)|958 (CD40)|966 (CD59)|1378 (CR1)|1604 (CD55)|1889 (ECE1)|2050 (EPHB4)|2335 (FN1)|2632 (GBE1)|3251 (HPRT1)|3315 (HSPB1)|3339 (HSPG2)|3426 (CFI)|3490 (IGFBP7)|3672 (ITGA1)|3688 (ITGB1)|3910 (LAMA4)|3911 (LAMA5)|3915 (LAMC1)|4059 (BCAM)|4256 (MGP)|4811 (NID1)|4831 (NME2)|5175 (PECAM1)|5243 (ABCB1)|52…
		EC	GO|GO.CC	GO:0005911	cell-cell junction	1.50372e-09	0.000171364	28	81 (ACTN4)|301 (ANXA1)|302 (ANXA2)|1003 (CDH5)|1495 (CTNNA1)|2701 (GJA4)|2702 (GJA5)|3688 (ITGB1)|3987 (LIMS1)|5175 (PECAM1)|5420 (PODXL)|6282 (S100A11)|6513 (SLC2A1)|7010 (TEK)|7074 (TIAM1)|7122 (CLDN5)|8322 (FZD4)|8826 (IQGAP1)|23586 (DDX58)|29766 (TMOD3)|51599 (LSR)|57493 (HEG1)|79026 (AHNAK)|83872 (HMCN1)|84952 (CGNL1)|90952 (ESAM)|153562 (MARVELD2)|100506658 (OCLN)
		EC	GO|GO.BP	GO:0003007	heart morphogenesis	1.61516e-09	0.000184064	21	94 (ACVRL1)|182 (JAG1)|2022 (ENG)|2050 (EPHB4)|2296 (FOXC1)|2702 (GJA5)|4091 (SMAD6)|4487 (MSX1)|4846 (NOS3)|6591 (SNAI2)|6909 (TBX2)|6926 (TBX3)|7010 (TEK)|7049 (TGFBR3)|7122 (CLDN5)|7547 (ZIC3)|8463 (TEAD2)|10395 (DLC1)|54567 (DLL4)|57493 (HEG1)|64321 (SOX17)
		EC	GO|GO.BP	GO:0048513	animal organ development	2.11688e-09	0.000241239	101	32 (ACACB)|94 (ACVRL1)|182 (JAG1)|187 (APLNR)|285 (ANGPT2)|301 (ANXA1)|302 (ANXA2)|306 (ANXA3)|682 (BSG)|857 (CAV1)|871 (SERPINH1)|947 (CD34)|1030 (CDKN2B)|1282 (COL4A1)|1378 (CR1)|1495 (CTNNA1)|1848 (DUSP6)|1889 (ECE1)|2022 (ENG)|2050 (EPHB4)|2113 (ETS1)|2122 (MECOM)|2296 (FOXC1)|2313 (FLI1)|2324 (FLT4)|2624 (GATA2)|2702 (GJA5)|2828 (GPR4)|3251 (HPRT1)|3339 (HSPG2)|3665 (IRF7)|3688 (ITGB1)|3717 …
		EC	GO|GO.BP	GO:0002009	morphogenesis of an epithelium	2.1356e-09	0.000243373	29	94 (ACVRL1)|182 (JAG1)|389 (RHOC)|977 (CD151)|1282 (COL4A1)|2022 (ENG)|3911 (LAMA5)|5420 (PODXL)|5979 (RET)|6591 (SNAI2)|6788 (STK3)|6909 (TBX2)|6926 (TBX3)|7041 (TGFB1I1)|7074 (TIAM1)|7424 (VEGFC)|7547 (ZIC3)|8322 (FZD4)|8323 (FZD6)|8463 (TEAD2)|10395 (DLC1)|11235 (PDCD10)|25865 (PRKD2)|51176 (LEF1)|54567 (DLL4)|64321 (SOX17)|79191 (IRX3)|90627 (STARD13)|219736 (STOX1)
		EC	GO|GO.BP	GO:0002376	immune system process	2.1592e-09	0.000246062	93	182 (JAG1)|285 (ANGPT2)|301 (ANXA1)|302 (ANXA2)|306 (ANXA3)|682 (BSG)|857 (CAV1)|947 (CD34)|958 (CD40)|966 (CD59)|977 (CD151)|1030 (CDKN2B)|1378 (CR1)|1604 (CD55)|1997 (ELF1)|2113 (ETS1)|2122 (MECOM)|2296 (FOXC1)|2313 (FLI1)|2321 (FLT1)|2335 (FN1)|2615 (LRRC32)|2624 (GATA2)|2634 (GBP2)|2826 (CCR10)|2886 (GRB7)|3251 (HPRT1)|3384 (ICAM2)|3426 (CFI)|3454 (IFNAR1)|3480 (IGF1R)|3554 (IL1R1)|3665 (IRF7…
		EC	GO|GO.BP	GO:0010810	regulation of cell-substrate adhesion	2.17831e-09	0.00024824	19	81 (ACTN4)|94 (ACVRL1)|182 (JAG1)|285 (ANGPT2)|1842 (ECM2)|2335 (FN1)|3717 (JAK2)|3987 (LIMS1)|4811 (NID1)|7010 (TEK)|7402 (UTRN)|7448 (VTN)|8322 (FZD4)|8826 (IQGAP1)|10395 (DLC1)|22915 (MMRN1)|29984 (RHOD)|79812 (MMRN2)|340485 (ACER2)
		EC	GO|GO.BP	GO:0010632	regulation of epithelial cell migration	2.39245e-09	0.000272644	22	94 (ACVRL1)|285 (ANGPT2)|301 (ANXA1)|306 (ANXA3)|958 (CD40)|2113 (ETS1)|2324 (FLT4)|2624 (GATA2)|3315 (HSPB1)|4846 (NOS3)|5547 (PRCP)|7010 (TEK)|7424 (VEGFC)|10769 (PLK2)|11235 (PDCD10)|25865 (PRKD2)|29775 (CARD10)|54567 (DLL4)|56999 (ADAMTS9)|57381 (RHOJ)|79812 (MMRN2)|90627 (STARD13)
		EC	GO|GO.CC	GO:0044421	extracellular region part	2.72823e-09	0.000310909	106	81 (ACTN4)|285 (ANGPT2)|301 (ANXA1)|302 (ANXA2)|306 (ANXA3)|308 (ANXA5)|389 (RHOC)|633 (BGN)|682 (BSG)|822 (CAPG)|871 (SERPINH1)|947 (CD34)|958 (CD40)|966 (CD59)|977 (CD151)|1282 (COL4A1)|1378 (CR1)|1604 (CD55)|1842 (ECM2)|1889 (ECE1)|2022 (ENG)|2050 (EPHB4)|2321 (FLT1)|2335 (FN1)|2615 (LRRC32)|2632 (GBE1)|3251 (HPRT1)|3315 (HSPB1)|3339 (HSPG2)|3426 (CFI)|3490 (IGFBP7)|3672 (ITGA1)|3688 (ITGB1)|3…
		EC	GO|GO.BP	GO:0051241	negative regulation of multicellular organismal process	2.86986e-09	0.000327049	51	94 (ACVRL1)|182 (JAG1)|285 (ANGPT2)|301 (ANXA1)|302 (ANXA2)|308 (ANXA5)|947 (CD34)|1495 (CTNNA1)|2296 (FOXC1)|2335 (FN1)|2615 (LRRC32)|2624 (GATA2)|2702 (GJA5)|2828 (GPR4)|3339 (HSPG2)|3717 (JAK2)|3910 (LAMA4)|4017 (LOXL2)|4091 (SMAD6)|4831 (NME2)|4846 (NOS3)|4881 (NPR1)|4982 (TNFRSF11B)|5552 (SRGN)|6591 (SNAI2)|6788 (STK3)|6909 (TBX2)|7010 (TEK)|7035 (TFPI)|7056 (THBD)|7075 (TIE1)|7076 (TIMP1)|7…
		EC	GO|GO.BP	GO:0048522	positive regulation of cellular process	4.13538e-09	0.000471268	137	32 (ACACB)|81 (ACTN4)|94 (ACVRL1)|182 (JAG1)|187 (APLNR)|301 (ANXA1)|302 (ANXA2)|306 (ANXA3)|308 (ANXA5)|389 (RHOC)|663 (BNIP2)|857 (CAV1)|947 (CD34)|958 (CD40)|977 (CD151)|1003 (CDH5)|1030 (CDKN2B)|1163 (CKS1B)|1378 (CR1)|1390 (CREM)|1495 (CTNNA1)|1604 (CD55)|1848 (DUSP6)|1879 (EBF1)|1889 (ECE1)|1997 (ELF1)|2022 (ENG)|2050 (EPHB4)|2078 (ERG)|2113 (ETS1)|2122 (MECOM)|2296 (FOXC1)|2313 (FLI1)|2321…
		EC	GO|GO.CC	GO:0016020	membrane	4.18988e-09	0.000477479	209	32 (ACACB)|94 (ACVRL1)|125 (ADH1B)|182 (JAG1)|187 (APLNR)|285 (ANGPT2)|301 (ANXA1)|302 (ANXA2)|306 (ANXA3)|308 (ANXA5)|368 (ABCC6)|389 (RHOC)|633 (BGN)|682 (BSG)|831 (CAST)|857 (CAV1)|871 (SERPINH1)|947 (CD34)|958 (CD40)|966 (CD59)|977 (CD151)|1003 (CDH5)|1258 (CNGB1)|1317 (SLC31A1)|1349 (COX7B)|1378 (CR1)|1495 (CTNNA1)|1604 (CD55)|1889 (ECE1)|2012 (EMP1)|2022 (ENG)|2050 (EPHB4)|2321 (FLT1)|2324 …
		EC	GO|GO.CC	GO:0044425	membrane part	4.31994e-09	0.0004923	164	94 (ACVRL1)|182 (JAG1)|187 (APLNR)|301 (ANXA1)|302 (ANXA2)|308 (ANXA5)|368 (ABCC6)|389 (RHOC)|682 (BSG)|857 (CAV1)|871 (SERPINH1)|947 (CD34)|958 (CD40)|966 (CD59)|977 (CD151)|1003 (CDH5)|1258 (CNGB1)|1317 (SLC31A1)|1349 (COX7B)|1378 (CR1)|1495 (CTNNA1)|1604 (CD55)|1889 (ECE1)|2012 (EMP1)|2022 (ENG)|2050 (EPHB4)|2321 (FLT1)|2324 (FLT4)|2335 (FN1)|2615 (LRRC32)|2701 (GJA4)|2702 (GJA5)|2791 (GNG11)|…
		EC	GO|GO.CC	GO:0044444	cytoplasmic part	5.42211e-09	0.000617904	212	32 (ACACB)|81 (ACTN4)|125 (ADH1B)|301 (ANXA1)|302 (ANXA2)|306 (ANXA3)|308 (ANXA5)|368 (ABCC6)|389 (RHOC)|633 (BGN)|663 (BNIP2)|682 (BSG)|689 (BTF3)|822 (CAPG)|831 (CAST)|839 (CASP6)|840 (CASP7)|857 (CAV1)|871 (SERPINH1)|947 (CD34)|966 (CD59)|977 (CD151)|1030 (CDKN2B)|1033 (CDKN3)|1258 (CNGB1)|1282 (COL4A1)|1317 (SLC31A1)|1349 (COX7B)|1378 (CR1)|1495 (CTNNA1)|1604 (CD55)|1848 (DUSP6)|1889 (ECE1)|2…
		EC	GO|GO.BP	GO:0007507	heart development	5.82146e-09	0.000663414	31	32 (ACACB)|94 (ACVRL1)|182 (JAG1)|187 (APLNR)|302 (ANXA2)|1848 (DUSP6)|1889 (ECE1)|2022 (ENG)|2050 (EPHB4)|2296 (FOXC1)|2702 (GJA5)|3688 (ITGB1)|3764 (KCNJ8)|4091 (SMAD6)|4487 (MSX1)|4846 (NOS3)|6591 (SNAI2)|6788 (STK3)|6909 (TBX2)|6926 (TBX3)|7010 (TEK)|7049 (TGFBR3)|7122 (CLDN5)|7547 (ZIC3)|8463 (TEAD2)|8862 (APLN)|10395 (DLC1)|54567 (DLL4)|56999 (ADAMTS9)|57493 (HEG1)|64321 (SOX17)
		EC	GO|GO.CC	GO:0005887	integral component of plasma membrane	5.96388e-09	0.000679643	59	94 (ACVRL1)|182 (JAG1)|187 (APLNR)|682 (BSG)|857 (CAV1)|947 (CD34)|958 (CD40)|977 (CD151)|1317 (SLC31A1)|1378 (CR1)|2050 (EPHB4)|2321 (FLT1)|2324 (FLT4)|2615 (LRRC32)|2701 (GJA4)|2702 (GJA5)|2826 (CCR10)|2828 (GPR4)|3356 (HTR2A)|3384 (ICAM2)|3454 (IFNAR1)|3480 (IGF1R)|3554 (IL1R1)|3672 (ITGA1)|3688 (ITGB1)|3764 (KCNJ8)|3784 (KCNQ1)|4059 (BCAM)|4071 (TM4SF1)|5420 (PODXL)|5787 (PTPRB)|5979 (RET)|65…
		EC	GO|GO.CC	GO:0031410	cytoplasmic vesicle	7.70747e-09	0.000878344	74	81 (ACTN4)|301 (ANXA1)|302 (ANXA2)|306 (ANXA3)|633 (BGN)|682 (BSG)|822 (CAPG)|857 (CAV1)|966 (CD59)|1258 (CNGB1)|1317 (SLC31A1)|1378 (CR1)|1495 (CTNNA1)|1604 (CD55)|1889 (ECE1)|2321 (FLT1)|2335 (FN1)|3356 (HTR2A)|3454 (IFNAR1)|3665 (IRF7)|3672 (ITGA1)|3688 (ITGB1)|3717 (JAK2)|3784 (KCNQ1)|4831 (NME2)|4846 (NOS3)|4935 (GPR143)|5175 (PECAM1)|5265 (SERPINA1)|5269 (SERPINB6)|5547 (PRCP)|5552 (SRGN)|5…
		EC	GO|GO.BP	GO:0072006	nephron development	8.04371e-09	0.000916661	15	182 (JAG1)|285 (ANGPT2)|947 (CD34)|2296 (FOXC1)|2828 (GPR4)|3911 (LAMA5)|4811 (NID1)|5175 (PECAM1)|5420 (PODXL)|5979 (RET)|7010 (TEK)|8826 (IQGAP1)|25937 (WWTR1)|79191 (IRX3)|282679 (AQP11)
		EC	GO|GO.CC	GO:0097708	intracellular vesicle	8.15448e-09	0.000929285	74	81 (ACTN4)|301 (ANXA1)|302 (ANXA2)|306 (ANXA3)|633 (BGN)|682 (BSG)|822 (CAPG)|857 (CAV1)|966 (CD59)|1258 (CNGB1)|1317 (SLC31A1)|1378 (CR1)|1495 (CTNNA1)|1604 (CD55)|1889 (ECE1)|2321 (FLT1)|2335 (FN1)|3356 (HTR2A)|3454 (IFNAR1)|3665 (IRF7)|3672 (ITGA1)|3688 (ITGB1)|3717 (JAK2)|3784 (KCNQ1)|4831 (NME2)|4846 (NOS3)|4935 (GPR143)|5175 (PECAM1)|5265 (SERPINA1)|5269 (SERPINB6)|5547 (PRCP)|5552 (SRGN)|5…
		EC	GO|GO.BP	GO:0008284	positive regulation of cell proliferation	8.15784e-09	0.000929667	42	94 (ACVRL1)|187 (APLNR)|301 (ANXA1)|302 (ANXA2)|958 (CD40)|1604 (CD55)|2113 (ETS1)|2321 (FLT1)|2324 (FLT4)|2335 (FN1)|2624 (GATA2)|3356 (HTR2A)|3480 (IGF1R)|3688 (ITGB1)|3717 (JAK2)|3915 (LAMC1)|4831 (NME2)|4953 (ODC1)|5583 (PRKCH)|6909 (TBX2)|6926 (TBX3)|7010 (TEK)|7049 (TGFBR3)|7074 (TIAM1)|7076 (TIMP1)|7424 (VEGFC)|8862 (APLN)|9180 (OSMR)|10135 (NAMPT)|10257 (ABCC4)|10763 (NES)|11235 (PDCD10)|…
		EC	GO|GO.BP	GO:0048584	positive regulation of response to stimulus	9.47071e-09	0.00107928	76	81 (ACTN4)|94 (ACVRL1)|182 (JAG1)|301 (ANXA1)|389 (RHOC)|857 (CAV1)|958 (CD40)|966 (CD59)|1030 (CDKN2B)|1378 (CR1)|1495 (CTNNA1)|1604 (CD55)|1848 (DUSP6)|1997 (ELF1)|2022 (ENG)|2050 (EPHB4)|2113 (ETS1)|2321 (FLT1)|2324 (FLT4)|2624 (GATA2)|2828 (GPR4)|2886 (GRB7)|3090 (HIC1)|3315 (HSPB1)|3356 (HTR2A)|3384 (ICAM2)|3426 (CFI)|3480 (IGF1R)|3554 (IL1R1)|3665 (IRF7)|3672 (ITGA1)|3688 (ITGB1)|3717 (JAK2…
		EC	GO|GO.BP	GO:0065007	biological regulation	1.00268e-08	0.00114266	257	32 (ACACB)|81 (ACTN4)|94 (ACVRL1)|182 (JAG1)|187 (APLNR)|285 (ANGPT2)|301 (ANXA1)|302 (ANXA2)|306 (ANXA3)|308 (ANXA5)|389 (RHOC)|663 (BNIP2)|682 (BSG)|822 (CAPG)|831 (CAST)|839 (CASP6)|857 (CAV1)|871 (SERPINH1)|947 (CD34)|958 (CD40)|966 (CD59)|977 (CD151)|1003 (CDH5)|1030 (CDKN2B)|1033 (CDKN3)|1163 (CKS1B)|1258 (CNGB1)|1282 (COL4A1)|1317 (SLC31A1)|1378 (CR1)|1390 (CREM)|1495 (CTNNA1)|1604 (CD55)|…
		EC	GO|GO.MF	GO:0050839	cell adhesion molecule binding	1.20331e-08	0.0013713	28	81 (ACTN4)|301 (ANXA1)|302 (ANXA2)|682 (BSG)|822 (CAPG)|831 (CAST)|977 (CD151)|1003 (CDH5)|1495 (CTNNA1)|1842 (ECM2)|2335 (FN1)|3384 (ICAM2)|3688 (ITGB1)|3911 (LAMA5)|6282 (S100A11)|7402 (UTRN)|7448 (VTN)|7450 (VWF)|8174 (MADCAM1)|8826 (IQGAP1)|10516 (FBLN5)|22837 (COBLL1)|26136 (TES)|29766 (TMOD3)|57488 (ESYT2)|79026 (AHNAK)|83872 (HMCN1)|93663 (ARHGAP18)
		EC	GO|GO.BP	GO:0007599	hemostasis	1.28837e-08	0.00146823	23	302 (ANXA2)|308 (ANXA5)|857 (CAV1)|947 (CD34)|958 (CD40)|966 (CD59)|2313 (FLI1)|2624 (GATA2)|3315 (HSPB1)|3717 (JAK2)|4846 (NOS3)|5265 (SERPINA1)|5547 (PRCP)|5583 (PRKCH)|7035 (TFPI)|7056 (THBD)|7448 (VTN)|7450 (VWF)|8323 (FZD6)|10544 (PROCR)|22915 (MMRN1)|30846 (EHD2)|375033 (PEAR1)
		EC	GO|GO.CC	GO:0031226	intrinsic component of plasma membrane	1.30059e-08	0.00148215	60	94 (ACVRL1)|182 (JAG1)|187 (APLNR)|682 (BSG)|857 (CAV1)|947 (CD34)|958 (CD40)|966 (CD59)|977 (CD151)|1317 (SLC31A1)|1378 (CR1)|2050 (EPHB4)|2321 (FLT1)|2324 (FLT4)|2615 (LRRC32)|2701 (GJA4)|2702 (GJA5)|2826 (CCR10)|2828 (GPR4)|3356 (HTR2A)|3384 (ICAM2)|3454 (IFNAR1)|3480 (IGF1R)|3554 (IL1R1)|3672 (ITGA1)|3688 (ITGB1)|3764 (KCNJ8)|3784 (KCNQ1)|4059 (BCAM)|4071 (TM4SF1)|5420 (PODXL)|5787 (PTPRB)|59…
		EC	GO|GO.CC	GO:0005576	extracellular region	1.38233e-08	0.00157531	120	81 (ACTN4)|182 (JAG1)|285 (ANGPT2)|301 (ANXA1)|302 (ANXA2)|306 (ANXA3)|308 (ANXA5)|389 (RHOC)|633 (BGN)|682 (BSG)|822 (CAPG)|871 (SERPINH1)|947 (CD34)|958 (CD40)|966 (CD59)|977 (CD151)|1282 (COL4A1)|1378 (CR1)|1604 (CD55)|1842 (ECM2)|1889 (ECE1)|2022 (ENG)|2050 (EPHB4)|2321 (FLT1)|2324 (FLT4)|2335 (FN1)|2615 (LRRC32)|2632 (GBE1)|3251 (HPRT1)|3315 (HSPB1)|3339 (HSPG2)|3426 (CFI)|3490 (IGFBP7)|3554…
		EC	GO|GO.BP	GO:0070848	response to growth factor	1.56291e-08	0.00178109	35	94 (ACVRL1)|285 (ANGPT2)|301 (ANXA1)|306 (ANXA3)|857 (CAV1)|1003 (CDH5)|1030 (CDKN2B)|1848 (DUSP6)|2022 (ENG)|2296 (FOXC1)|2321 (FLT1)|2324 (FLT4)|2615 (LRRC32)|3315 (HSPB1)|3987 (LIMS1)|4091 (SMAD6)|4487 (MSX1)|6591 (SNAI2)|7041 (TGFB1I1)|7049 (TGFBR3)|7122 (CLDN5)|7424 (VEGFC)|7448 (VTN)|7525 (YES1)|8322 (FZD4)|8737 (RIPK1)|8826 (IQGAP1)|8862 (APLN)|25805 (BAMBI)|25865 (PRKD2)|26509 (MYOF)|5117…
		EC	GO|GO.BP	GO:0050878	regulation of body fluid levels	1.63596e-08	0.00186433	28	187 (APLNR)|302 (ANXA2)|308 (ANXA5)|857 (CAV1)|947 (CD34)|958 (CD40)|966 (CD59)|2313 (FLI1)|2624 (GATA2)|2702 (GJA5)|3315 (HSPB1)|3717 (JAK2)|4846 (NOS3)|4881 (NPR1)|5265 (SERPINA1)|5547 (PRCP)|5583 (PRKCH)|7035 (TFPI)|7056 (THBD)|7448 (VTN)|7450 (VWF)|8323 (FZD6)|8862 (APLN)|10544 (PROCR)|22915 (MMRN1)|30846 (EHD2)|57493 (HEG1)|375033 (PEAR1)
		EC	GO|GO.BP	GO:0007043	cell-cell junction assembly	1.69582e-08	0.00193256	14	81 (ACTN4)|389 (RHOC)|857 (CAV1)|1003 (CDH5)|1495 (CTNNA1)|2701 (GJA4)|2702 (GJA5)|5583 (PRKCH)|6591 (SNAI2)|7122 (CLDN5)|51599 (LSR)|57493 (HEG1)|153562 (MARVELD2)|100506658 (OCLN)
		EC	GO|GO.MF	GO:0003674	molecular_function	1.70673e-08	0.00194499	323	32 (ACACB)|81 (ACTN4)|94 (ACVRL1)|125 (ADH1B)|182 (JAG1)|187 (APLNR)|285 (ANGPT2)|301 (ANXA1)|302 (ANXA2)|306 (ANXA3)|308 (ANXA5)|368 (ABCC6)|389 (RHOC)|633 (BGN)|663 (BNIP2)|682 (BSG)|689 (BTF3)|822 (CAPG)|831 (CAST)|839 (CASP6)|840 (CASP7)|857 (CAV1)|871 (SERPINH1)|947 (CD34)|958 (CD40)|966 (CD59)|977 (CD151)|1003 (CDH5)|1030 (CDKN2B)|1033 (CDKN3)|1163 (CKS1B)|1258 (CNGB1)|1282 (COL4A1)|1317 (S…
		EC	GO|GO.BP	GO:0010604	positive regulation of macromolecule metabolic process	1.71124e-08	0.00195013	95	81 (ACTN4)|94 (ACVRL1)|182 (JAG1)|187 (APLNR)|302 (ANXA2)|306 (ANXA3)|857 (CAV1)|947 (CD34)|958 (CD40)|1030 (CDKN2B)|1163 (CKS1B)|1378 (CR1)|1390 (CREM)|1848 (DUSP6)|1879 (EBF1)|1889 (ECE1)|1997 (ELF1)|2022 (ENG)|2050 (EPHB4)|2078 (ERG)|2113 (ETS1)|2122 (MECOM)|2296 (FOXC1)|2313 (FLI1)|2321 (FLT1)|2324 (FLT4)|2335 (FN1)|2615 (LRRC32)|2624 (GATA2)|3315 (HSPB1)|3356 (HTR2A)|3480 (IGF1R)|3665 (IRF7)…
		EC	GO|GO.BP	GO:0009887	animal organ morphogenesis	1.80996e-08	0.00206263	42	94 (ACVRL1)|182 (JAG1)|302 (ANXA2)|682 (BSG)|857 (CAV1)|871 (SERPINH1)|947 (CD34)|1495 (CTNNA1)|2022 (ENG)|2050 (EPHB4)|2296 (FOXC1)|2313 (FLI1)|2624 (GATA2)|2702 (GJA5)|3911 (LAMA5)|3983 (ABLIM1)|4091 (SMAD6)|4256 (MGP)|4487 (MSX1)|4846 (NOS3)|4982 (TNFRSF11B)|6591 (SNAI2)|6909 (TBX2)|6926 (TBX3)|7010 (TEK)|7049 (TGFBR3)|7074 (TIAM1)|7122 (CLDN5)|7424 (VEGFC)|7547 (ZIC3)|8322 (FZD4)|8323 (FZD6)|…
		EC	GO|GO.MF	GO:0019955	cytokine binding	2.08959e-08	0.0023813	14	94 (ACVRL1)|2022 (ENG)|2615 (LRRC32)|2826 (CCR10)|3454 (IFNAR1)|3554 (IL1R1)|3688 (ITGB1)|3953 (LEPR)|5355 (PLP2)|7049 (TGFBR3)|8322 (FZD4)|9180 (OSMR)|9466 (IL27RA)|135228 (CD109)
		EC	GO|GO.BP	GO:0003013	circulatory system process	2.21088e-08	0.00251952	28	94 (ACVRL1)|857 (CAV1)|947 (CD34)|1889 (ECE1)|2296 (FOXC1)|2313 (FLI1)|2702 (GJA5)|3356 (HTR2A)|3672 (ITGA1)|3717 (JAK2)|3764 (KCNJ8)|3784 (KCNQ1)|4846 (NOS3)|4881 (NPR1)|5547 (PRCP)|6909 (TBX2)|7010 (TEK)|7424 (VEGFC)|7525 (YES1)|8654 (PDE5A)|8862 (APLN)|10008 (KCNE3)|10135 (NAMPT)|25937 (WWTR1)|26251 (KCNG2)|26509 (MYOF)|54567 (DLL4)|57493 (HEG1)
		EC	GO|GO.CC	GO:0098805	whole membrane	2.29749e-08	0.00261822	58	32 (ACACB)|301 (ANXA1)|302 (ANXA2)|306 (ANXA3)|368 (ABCC6)|682 (BSG)|857 (CAV1)|871 (SERPINH1)|966 (CD59)|1258 (CNGB1)|1378 (CR1)|1495 (CTNNA1)|1604 (CD55)|1889 (ECE1)|3356 (HTR2A)|3665 (IRF7)|3672 (ITGA1)|3688 (ITGB1)|3717 (JAK2)|3784 (KCNQ1)|4128 (MAOA)|4846 (NOS3)|4935 (GPR143)|5175 (PECAM1)|5269 (SERPINB6)|5420 (PODXL)|5547 (PRCP)|5787 (PTPRB)|5979 (RET)|6513 (SLC2A1)|6645 (SNTB2)|7010 (TEK)|…
		EC	GO|GO.BP	GO:0001655	urogenital system development	2.37173e-08	0.00270282	22	182 (JAG1)|285 (ANGPT2)|301 (ANXA1)|947 (CD34)|1282 (COL4A1)|2296 (FOXC1)|2624 (GATA2)|2828 (GPR4)|3764 (KCNJ8)|3911 (LAMA5)|4091 (SMAD6)|4811 (NID1)|4953 (ODC1)|5175 (PECAM1)|5420 (PODXL)|5979 (RET)|7010 (TEK)|8826 (IQGAP1)|25937 (WWTR1)|64321 (SOX17)|79191 (IRX3)|282679 (AQP11)
		EC	GO|GO.CC	GO:0005615	extracellular space	2.44404e-08	0.00278523	99	81 (ACTN4)|285 (ANGPT2)|301 (ANXA1)|302 (ANXA2)|306 (ANXA3)|308 (ANXA5)|389 (RHOC)|633 (BGN)|682 (BSG)|822 (CAPG)|871 (SERPINH1)|958 (CD40)|966 (CD59)|1282 (COL4A1)|1378 (CR1)|1604 (CD55)|1889 (ECE1)|2022 (ENG)|2050 (EPHB4)|2321 (FLT1)|2335 (FN1)|2615 (LRRC32)|2632 (GBE1)|3251 (HPRT1)|3315 (HSPB1)|3339 (HSPG2)|3426 (CFI)|3490 (IGFBP7)|3672 (ITGA1)|3688 (ITGB1)|3910 (LAMA4)|3911 (LAMA5)|3915 (LAMC…
		EC	GO|GO.BP	GO:0030155	regulation of cell adhesion	2.47193e-08	0.00281701	33	81 (ACTN4)|94 (ACVRL1)|182 (JAG1)|285 (ANGPT2)|301 (ANXA1)|857 (CAV1)|1604 (CD55)|1842 (ECM2)|2113 (ETS1)|2335 (FN1)|2615 (LRRC32)|3717 (JAK2)|3910 (LAMA4)|3911 (LAMA5)|3987 (LIMS1)|4811 (NID1)|5420 (PODXL)|5979 (RET)|6591 (SNAI2)|7010 (TEK)|7402 (UTRN)|7448 (VTN)|7525 (YES1)|8322 (FZD4)|8654 (PDE5A)|8826 (IQGAP1)|10395 (DLC1)|22915 (MMRN1)|25865 (PRKD2)|29984 (RHOD)|51176 (LEF1)|79812 (MMRN2)|34…
		EC	GO|GO.CC	GO:0012505	endomembrane system	3.4633e-08	0.00394678	116	32 (ACACB)|81 (ACTN4)|301 (ANXA1)|302 (ANXA2)|306 (ANXA3)|368 (ABCC6)|633 (BGN)|663 (BNIP2)|682 (BSG)|831 (CAST)|857 (CAV1)|871 (SERPINH1)|966 (CD59)|1258 (CNGB1)|1282 (COL4A1)|1317 (SLC31A1)|1378 (CR1)|1495 (CTNNA1)|1604 (CD55)|1889 (ECE1)|2321 (FLT1)|2335 (FN1)|2634 (GBP2)|2826 (CCR10)|3339 (HSPG2)|3454 (IFNAR1)|3490 (IGFBP7)|3665 (IRF7)|3672 (ITGA1)|3688 (ITGB1)|3717 (JAK2)|3784 (KCNQ1)|3915 (…
		EC	GO|GO.BP	GO:0065008	regulation of biological quality	3.50319e-08	0.00399224	106	32 (ACACB)|94 (ACVRL1)|187 (APLNR)|301 (ANXA1)|302 (ANXA2)|308 (ANXA5)|389 (RHOC)|822 (CAPG)|857 (CAV1)|947 (CD34)|958 (CD40)|966 (CD59)|1258 (CNGB1)|1317 (SLC31A1)|1604 (CD55)|1889 (ECE1)|2113 (ETS1)|2296 (FOXC1)|2313 (FLI1)|2335 (FN1)|2624 (GATA2)|2702 (GJA5)|2826 (CCR10)|2828 (GPR4)|3315 (HSPB1)|3356 (HTR2A)|3480 (IGF1R)|3672 (ITGA1)|3717 (JAK2)|3764 (KCNJ8)|3784 (KCNQ1)|3910 (LAMA4)|3953 (LEP…
		EC	GO|GO.BP	GO:0045597	positive regulation of cell differentiation	4.21851e-08	0.00480742	41	94 (ACVRL1)|182 (JAG1)|301 (ANXA1)|302 (ANXA2)|663 (BNIP2)|947 (CD34)|1003 (CDH5)|1495 (CTNNA1)|2022 (ENG)|2113 (ETS1)|2296 (FOXC1)|2335 (FN1)|2624 (GATA2)|3356 (HTR2A)|3717 (JAK2)|3987 (LIMS1)|4017 (LOXL2)|4831 (NME2)|5583 (PRKCH)|5979 (RET)|6591 (SNAI2)|6788 (STK3)|7041 (TGFB1I1)|7074 (TIAM1)|7122 (CLDN5)|7424 (VEGFC)|8322 (FZD4)|8519 (IFITM1)|8578 (SCARF1)|8654 (PDE5A)|8737 (RIPK1)|8826 (IQGAP…
		EC	GO|GO.BP	GO:0009893	positive regulation of metabolic process	4.35384e-08	0.00496163	99	32 (ACACB)|81 (ACTN4)|94 (ACVRL1)|182 (JAG1)|187 (APLNR)|301 (ANXA1)|302 (ANXA2)|306 (ANXA3)|857 (CAV1)|947 (CD34)|958 (CD40)|1030 (CDKN2B)|1163 (CKS1B)|1378 (CR1)|1390 (CREM)|1848 (DUSP6)|1879 (EBF1)|1889 (ECE1)|1997 (ELF1)|2022 (ENG)|2050 (EPHB4)|2078 (ERG)|2113 (ETS1)|2122 (MECOM)|2296 (FOXC1)|2313 (FLI1)|2321 (FLT1)|2324 (FLT4)|2335 (FN1)|2615 (LRRC32)|2624 (GATA2)|3251 (HPRT1)|3315 (HSPB1)|3…
		EC	GO|GO.BP	GO:0007596	blood coagulation	4.55236e-08	0.00518787	22	302 (ANXA2)|308 (ANXA5)|857 (CAV1)|947 (CD34)|958 (CD40)|966 (CD59)|2624 (GATA2)|3315 (HSPB1)|3717 (JAK2)|4846 (NOS3)|5265 (SERPINA1)|5547 (PRCP)|5583 (PRKCH)|7035 (TFPI)|7056 (THBD)|7448 (VTN)|7450 (VWF)|8323 (FZD6)|10544 (PROCR)|22915 (MMRN1)|30846 (EHD2)|375033 (PEAR1)
		EC	GO|GO.BP	GO:0051093	negative regulation of developmental process	4.83927e-08	0.00551483	42	81 (ACTN4)|94 (ACVRL1)|182 (JAG1)|285 (ANGPT2)|301 (ANXA1)|302 (ANXA2)|857 (CAV1)|1495 (CTNNA1)|2296 (FOXC1)|2624 (GATA2)|2828 (GPR4)|3339 (HSPG2)|3688 (ITGB1)|4017 (LOXL2)|4091 (SMAD6)|4487 (MSX1)|4831 (NME2)|4846 (NOS3)|4881 (NPR1)|4982 (TNFRSF11B)|5552 (SRGN)|6591 (SNAI2)|6788 (STK3)|6909 (TBX2)|6926 (TBX3)|7010 (TEK)|7041 (TGFB1I1)|7075 (TIE1)|7076 (TIMP1)|7431 (VIM)|10135 (NAMPT)|10769 (PLK2…
		EC	GO|GO.BP	GO:0071363	cellular response to growth factor stimulus	6.09583e-08	0.00694681	33	94 (ACVRL1)|285 (ANGPT2)|301 (ANXA1)|857 (CAV1)|1003 (CDH5)|1030 (CDKN2B)|2022 (ENG)|2296 (FOXC1)|2321 (FLT1)|2324 (FLT4)|2615 (LRRC32)|3315 (HSPB1)|3987 (LIMS1)|4091 (SMAD6)|4487 (MSX1)|6591 (SNAI2)|7041 (TGFB1I1)|7049 (TGFBR3)|7122 (CLDN5)|7424 (VEGFC)|7448 (VTN)|7525 (YES1)|8322 (FZD4)|8737 (RIPK1)|8826 (IQGAP1)|8862 (APLN)|25805 (BAMBI)|25865 (PRKD2)|26509 (MYOF)|51176 (LEF1)|54567 (DLL4)|798…
		EC	GO|GO.BP	GO:0050817	coagulation	6.23479e-08	0.00710517	22	302 (ANXA2)|308 (ANXA5)|857 (CAV1)|947 (CD34)|958 (CD40)|966 (CD59)|2624 (GATA2)|3315 (HSPB1)|3717 (JAK2)|4846 (NOS3)|5265 (SERPINA1)|5547 (PRCP)|5583 (PRKCH)|7035 (TFPI)|7056 (THBD)|7448 (VTN)|7450 (VWF)|8323 (FZD6)|10544 (PROCR)|22915 (MMRN1)|30846 (EHD2)|375033 (PEAR1)
		EC	GO|GO.BP	GO:0072001	renal system development	7.12188e-08	0.0081161	20	182 (JAG1)|285 (ANGPT2)|947 (CD34)|1282 (COL4A1)|2296 (FOXC1)|2828 (GPR4)|3764 (KCNJ8)|3911 (LAMA5)|4091 (SMAD6)|4811 (NID1)|4953 (ODC1)|5175 (PECAM1)|5420 (PODXL)|5979 (RET)|7010 (TEK)|8826 (IQGAP1)|25937 (WWTR1)|64321 (SOX17)|79191 (IRX3)|282679 (AQP11)
		EC	GO|GO.BP	GO:0030154	cell differentiation	7.58134e-08	0.00863969	109	81 (ACTN4)|94 (ACVRL1)|182 (JAG1)|187 (APLNR)|285 (ANGPT2)|301 (ANXA1)|302 (ANXA2)|663 (BNIP2)|682 (BSG)|839 (CASP6)|857 (CAV1)|871 (SERPINH1)|947 (CD34)|1003 (CDH5)|1030 (CDKN2B)|1258 (CNGB1)|1282 (COL4A1)|1378 (CR1)|1390 (CREM)|1495 (CTNNA1)|1848 (DUSP6)|1997 (ELF1)|2022 (ENG)|2050 (EPHB4)|2078 (ERG)|2113 (ETS1)|2122 (MECOM)|2296 (FOXC1)|2313 (FLI1)|2321 (FLT1)|2324 (FLT4)|2335 (FN1)|2624 (GATA…
		EC	GO|GO.BP	GO:0009967	positive regulation of signal transduction	8.14197e-08	0.00927859	56	81 (ACTN4)|94 (ACVRL1)|182 (JAG1)|389 (RHOC)|857 (CAV1)|958 (CD40)|1030 (CDKN2B)|1495 (CTNNA1)|1848 (DUSP6)|2022 (ENG)|2050 (EPHB4)|2321 (FLT1)|2324 (FLT4)|2828 (GPR4)|2886 (GRB7)|3090 (HIC1)|3356 (HTR2A)|3480 (IGF1R)|3554 (IL1R1)|3665 (IRF7)|3672 (ITGA1)|3688 (ITGB1)|3717 (JAK2)|3987 (LIMS1)|4487 (MSX1)|4881 (NPR1)|5175 (PECAM1)|5583 (PRKCH)|5871 (MAP4K2)|5979 (RET)|6788 (STK3)|7010 (TEK)|7041 (…
		EC	GO|GO.BP	GO:0031325	positive regulation of cellular metabolic process	8.38153e-08	0.00955159	92	32 (ACACB)|81 (ACTN4)|94 (ACVRL1)|182 (JAG1)|187 (APLNR)|301 (ANXA1)|302 (ANXA2)|306 (ANXA3)|857 (CAV1)|958 (CD40)|1030 (CDKN2B)|1163 (CKS1B)|1378 (CR1)|1390 (CREM)|1848 (DUSP6)|1879 (EBF1)|1889 (ECE1)|1997 (ELF1)|2022 (ENG)|2050 (EPHB4)|2078 (ERG)|2113 (ETS1)|2122 (MECOM)|2296 (FOXC1)|2313 (FLI1)|2321 (FLT1)|2324 (FLT4)|2335 (FN1)|2624 (GATA2)|3251 (HPRT1)|3315 (HSPB1)|3356 (HTR2A)|3480 (IGF1R)|…
		EC	GO|GO.BP	GO:0010718	positive regulation of epithelial to mesenchymal transition	9.66935e-08	0.0110192	9	182 (JAG1)|2022 (ENG)|2296 (FOXC1)|4017 (LOXL2)|7041 (TGFB1I1)|7074 (TIAM1)|25805 (BAMBI)|25937 (WWTR1)|51176 (LEF1)
		EC	GO|GO.CC	GO:0031224	intrinsic component of membrane	9.93353e-08	0.0113202	135	94 (ACVRL1)|182 (JAG1)|187 (APLNR)|368 (ABCC6)|682 (BSG)|857 (CAV1)|947 (CD34)|958 (CD40)|966 (CD59)|977 (CD151)|1003 (CDH5)|1258 (CNGB1)|1317 (SLC31A1)|1349 (COX7B)|1378 (CR1)|1604 (CD55)|1889 (ECE1)|2012 (EMP1)|2050 (EPHB4)|2321 (FLT1)|2324 (FLT4)|2615 (LRRC32)|2701 (GJA4)|2702 (GJA5)|2826 (CCR10)|2828 (GPR4)|3356 (HTR2A)|3384 (ICAM2)|3454 (IFNAR1)|3480 (IGF1R)|3554 (IL1R1)|3672 (ITGA1)|3688 (I…
		EC	GO|GO.BP	GO:0080134	regulation of response to stress	1.10816e-07	0.0126286	52	301 (ANXA1)|302 (ANXA2)|308 (ANXA5)|857 (CAV1)|947 (CD34)|966 (CD59)|1003 (CDH5)|1378 (CR1)|1604 (CD55)|2113 (ETS1)|2122 (MECOM)|2324 (FLT4)|3090 (HIC1)|3315 (HSPB1)|3384 (ICAM2)|3426 (CFI)|3480 (IGF1R)|3554 (IL1R1)|3665 (IRF7)|3717 (JAK2)|4258 (MGST2)|4487 (MSX1)|4846 (NOS3)|5243 (ABCB1)|5272 (SERPINB9)|5871 (MAP4K2)|6591 (SNAI2)|6788 (STK3)|7010 (TEK)|7035 (TFPI)|7056 (THBD)|7074 (TIAM1)|7164 (…
		EC	GO|GO.BP	GO:0002042	cell migration involved in sprouting angiogenesis	1.11697e-07	0.012729	12	301 (ANXA1)|2050 (EPHB4)|2624 (GATA2)|3688 (ITGB1)|10769 (PLK2)|11235 (PDCD10)|29775 (CARD10)|54567 (DLL4)|57381 (RHOJ)|79812 (MMRN2)|90627 (STARD13)|161198 (CLEC14A)
		EC	GO|GO.BP	GO:0065009	regulation of molecular function	1.19457e-07	0.0136133	90	32 (ACACB)|81 (ACTN4)|182 (JAG1)|301 (ANXA1)|302 (ANXA2)|306 (ANXA3)|308 (ANXA5)|389 (RHOC)|663 (BNIP2)|831 (CAST)|857 (CAV1)|871 (SERPINH1)|958 (CD40)|1030 (CDKN2B)|1033 (CDKN3)|1163 (CKS1B)|1378 (CR1)|1848 (DUSP6)|2296 (FOXC1)|2321 (FLT1)|2335 (FN1)|3315 (HSPB1)|3356 (HTR2A)|3480 (IGF1R)|3672 (ITGA1)|3688 (ITGB1)|3717 (JAK2)|3953 (LEPR)|3987 (LIMS1)|4258 (MGST2)|4487 (MSX1)|4846 (NOS3)|4982 (TN…
		EC	GO|GO.BP	GO:0010595	positive regulation of endothelial cell migration	1.2166e-07	0.0138643	13	301 (ANXA1)|306 (ANXA3)|958 (CD40)|2113 (ETS1)|2324 (FLT4)|2624 (GATA2)|3315 (HSPB1)|4846 (NOS3)|7010 (TEK)|7424 (VEGFC)|10769 (PLK2)|25865 (PRKD2)|57381 (RHOJ)
		EC	GO|GO.BP	GO:0051173	positive regulation of nitrogen compound metabolic process	1.22267e-07	0.0139335	89	81 (ACTN4)|94 (ACVRL1)|182 (JAG1)|187 (APLNR)|302 (ANXA2)|306 (ANXA3)|857 (CAV1)|958 (CD40)|1030 (CDKN2B)|1163 (CKS1B)|1378 (CR1)|1390 (CREM)|1848 (DUSP6)|1879 (EBF1)|1997 (ELF1)|2022 (ENG)|2050 (EPHB4)|2078 (ERG)|2113 (ETS1)|2122 (MECOM)|2296 (FOXC1)|2313 (FLI1)|2321 (FLT1)|2324 (FLT4)|2335 (FN1)|2624 (GATA2)|3251 (HPRT1)|3315 (HSPB1)|3356 (HTR2A)|3480 (IGF1R)|3665 (IRF7)|3672 (ITGA1)|3717 (JAK2…
		EC	GO|GO.BP	GO:0048598	embryonic morphogenesis	1.26535e-07	0.0144199	29	187 (APLNR)|1889 (ECE1)|2022 (ENG)|2296 (FOXC1)|2321 (FLT1)|2335 (FN1)|2624 (GATA2)|2702 (GJA5)|3688 (ITGB1)|3911 (LAMA5)|4487 (MSX1)|5979 (RET)|6788 (STK3)|6909 (TBX2)|6926 (TBX3)|7041 (TGFB1I1)|7424 (VEGFC)|7448 (VTN)|7547 (ZIC3)|8323 (FZD6)|8463 (TEAD2)|8862 (APLN)|10395 (DLC1)|51176 (LEF1)|54567 (DLL4)|64321 (SOX17)|79191 (IRX3)|83595 (SOX7)|219736 (STOX1)
		EC	GO|GO.BP	GO:0007167	enzyme linked receptor protein signaling pathway	1.32345e-07	0.0150821	41	94 (ACVRL1)|285 (ANGPT2)|857 (CAV1)|1003 (CDH5)|1030 (CDKN2B)|1282 (COL4A1)|2022 (ENG)|2050 (EPHB4)|2296 (FOXC1)|2321 (FLT1)|2324 (FLT4)|2615 (LRRC32)|2886 (GRB7)|3315 (HSPB1)|3480 (IGF1R)|3672 (ITGA1)|3717 (JAK2)|4091 (SMAD6)|4487 (MSX1)|4881 (NPR1)|5979 (RET)|7010 (TEK)|7041 (TGFB1I1)|7049 (TGFBR3)|7074 (TIAM1)|7122 (CLDN5)|7424 (VEGFC)|7431 (VIM)|7448 (VTN)|7525 (YES1)|8322 (FZD4)|8826 (IQGAP1…
		EC	GO|GO.BP	GO:0050794	regulation of cellular process	1.42698e-07	0.0162619	226	32 (ACACB)|81 (ACTN4)|94 (ACVRL1)|182 (JAG1)|187 (APLNR)|285 (ANGPT2)|301 (ANXA1)|302 (ANXA2)|306 (ANXA3)|308 (ANXA5)|389 (RHOC)|663 (BNIP2)|682 (BSG)|822 (CAPG)|831 (CAST)|839 (CASP6)|857 (CAV1)|871 (SERPINH1)|947 (CD34)|958 (CD40)|966 (CD59)|977 (CD151)|1003 (CDH5)|1030 (CDKN2B)|1033 (CDKN3)|1163 (CKS1B)|1258 (CNGB1)|1282 (COL4A1)|1378 (CR1)|1390 (CREM)|1495 (CTNNA1)|1604 (CD55)|1848 (DUSP6)|18…
		EC	GO|GO.CC	GO:0044433	cytoplasmic vesicle part	1.66752e-07	0.0190031	52	81 (ACTN4)|301 (ANXA1)|302 (ANXA2)|306 (ANXA3)|682 (BSG)|857 (CAV1)|966 (CD59)|1258 (CNGB1)|1378 (CR1)|1604 (CD55)|1889 (ECE1)|2335 (FN1)|3665 (IRF7)|3717 (JAK2)|3784 (KCNQ1)|4831 (NME2)|4846 (NOS3)|4935 (GPR143)|5175 (PECAM1)|5265 (SERPINA1)|5269 (SERPINB6)|5547 (PRCP)|5552 (SRGN)|5787 (PTPRB)|5979 (RET)|6282 (S100A11)|6645 (SNTB2)|7076 (TIMP1)|7424 (VEGFC)|7450 (VWF)|8322 (FZD4)|8323 (FZD6)|857…
		EC	GO|GO.BP	GO:0023056	positive regulation of signaling	1.80052e-07	0.0205188	59	81 (ACTN4)|94 (ACVRL1)|182 (JAG1)|302 (ANXA2)|389 (RHOC)|857 (CAV1)|958 (CD40)|1030 (CDKN2B)|1495 (CTNNA1)|1848 (DUSP6)|1889 (ECE1)|2022 (ENG)|2050 (EPHB4)|2321 (FLT1)|2324 (FLT4)|2828 (GPR4)|2886 (GRB7)|3090 (HIC1)|3356 (HTR2A)|3480 (IGF1R)|3554 (IL1R1)|3665 (IRF7)|3672 (ITGA1)|3688 (ITGB1)|3717 (JAK2)|3987 (LIMS1)|4487 (MSX1)|4881 (NPR1)|5175 (PECAM1)|5583 (PRKCH)|5871 (MAP4K2)|5979 (RET)|6788 …
		EC	GO|GO.BP	GO:1901888	regulation of cell junction assembly	1.99444e-07	0.0227286	11	94 (ACVRL1)|857 (CAV1)|3987 (LIMS1)|5583 (PRKCH)|6591 (SNAI2)|7010 (TEK)|7122 (CLDN5)|8826 (IQGAP1)|10395 (DLC1)|29984 (RHOD)|100506658 (OCLN)
		EC	GO|GO.BP	GO:0002576	platelet degranulation	2.14528e-07	0.0244476	13	81 (ACTN4)|308 (ANXA5)|2335 (FN1)|5175 (PECAM1)|5265 (SERPINA1)|5552 (SRGN)|7076 (TIMP1)|7424 (VEGFC)|7450 (VWF)|10257 (ABCC4)|22915 (MMRN1)|94121 (SYTL4)|135228 (CD109)
		EC	GO|GO.BP	GO:0008015	blood circulation	2.22656e-07	0.0253738	26	94 (ACVRL1)|857 (CAV1)|947 (CD34)|1889 (ECE1)|2296 (FOXC1)|2313 (FLI1)|2702 (GJA5)|3356 (HTR2A)|3672 (ITGA1)|3717 (JAK2)|3764 (KCNJ8)|3784 (KCNQ1)|4846 (NOS3)|4881 (NPR1)|5547 (PRCP)|6909 (TBX2)|7010 (TEK)|7424 (VEGFC)|7525 (YES1)|8654 (PDE5A)|8862 (APLN)|10008 (KCNE3)|10135 (NAMPT)|26251 (KCNG2)|26509 (MYOF)|54567 (DLL4)
		EC	GO|GO.BP	GO:0050789	regulation of biological process	2.2538e-07	0.0256843	242	32 (ACACB)|81 (ACTN4)|94 (ACVRL1)|182 (JAG1)|187 (APLNR)|285 (ANGPT2)|301 (ANXA1)|302 (ANXA2)|306 (ANXA3)|308 (ANXA5)|389 (RHOC)|663 (BNIP2)|682 (BSG)|822 (CAPG)|831 (CAST)|839 (CASP6)|857 (CAV1)|871 (SERPINH1)|947 (CD34)|958 (CD40)|966 (CD59)|977 (CD151)|1003 (CDH5)|1030 (CDKN2B)|1033 (CDKN3)|1163 (CKS1B)|1258 (CNGB1)|1282 (COL4A1)|1378 (CR1)|1390 (CREM)|1495 (CTNNA1)|1604 (CD55)|1842 (ECM2)|184…
		EC	GO|GO.BP	GO:1902531	regulation of intracellular signal transduction	2.5226e-07	0.0287475	61	81 (ACTN4)|187 (APLNR)|389 (RHOC)|857 (CAV1)|958 (CD40)|1848 (DUSP6)|2022 (ENG)|2050 (EPHB4)|2122 (MECOM)|2321 (FLT1)|2324 (FLT4)|2335 (FN1)|2828 (GPR4)|3090 (HIC1)|3315 (HSPB1)|3356 (HTR2A)|3480 (IGF1R)|3672 (ITGA1)|3688 (ITGB1)|3717 (JAK2)|3987 (LIMS1)|4487 (MSX1)|4881 (NPR1)|4935 (GPR143)|5175 (PECAM1)|5871 (MAP4K2)|5979 (RET)|6237 (RRAS)|6591 (SNAI2)|6788 (STK3)|7010 (TEK)|7074 (TIAM1)|7075 (…
		EC	GO|GO.BP	GO:0010562	positive regulation of phosphorus metabolic process	2.76723e-07	0.0315353	43	94 (ACVRL1)|187 (APLNR)|302 (ANXA2)|857 (CAV1)|958 (CD40)|1163 (CKS1B)|1848 (DUSP6)|2022 (ENG)|2050 (EPHB4)|2321 (FLT1)|2324 (FLT4)|3356 (HTR2A)|3480 (IGF1R)|3672 (ITGA1)|3717 (JAK2)|4846 (NOS3)|5175 (PECAM1)|5871 (MAP4K2)|5979 (RET)|6788 (STK3)|7010 (TEK)|7074 (TIAM1)|7075 (TIE1)|7164 (TPD52L1)|7424 (VEGFC)|7448 (VTN)|7525 (YES1)|8322 (FZD4)|8654 (PDE5A)|8737 (RIPK1)|8826 (IQGAP1)|8862 (APLN)|10…
		EC	GO|GO.BP	GO:0045937	positive regulation of phosphate metabolic process	2.76723e-07	0.0315353	43	94 (ACVRL1)|187 (APLNR)|302 (ANXA2)|857 (CAV1)|958 (CD40)|1163 (CKS1B)|1848 (DUSP6)|2022 (ENG)|2050 (EPHB4)|2321 (FLT1)|2324 (FLT4)|3356 (HTR2A)|3480 (IGF1R)|3672 (ITGA1)|3717 (JAK2)|4846 (NOS3)|5175 (PECAM1)|5871 (MAP4K2)|5979 (RET)|6788 (STK3)|7010 (TEK)|7074 (TIAM1)|7075 (TIE1)|7164 (TPD52L1)|7424 (VEGFC)|7448 (VTN)|7525 (YES1)|8322 (FZD4)|8654 (PDE5A)|8737 (RIPK1)|8826 (IQGAP1)|8862 (APLN)|10…
		EC	GO|GO.MF	GO:0005488	binding	2.9896e-07	0.0340694	289	32 (ACACB)|81 (ACTN4)|94 (ACVRL1)|125 (ADH1B)|182 (JAG1)|285 (ANGPT2)|301 (ANXA1)|302 (ANXA2)|306 (ANXA3)|308 (ANXA5)|368 (ABCC6)|389 (RHOC)|633 (BGN)|663 (BNIP2)|682 (BSG)|689 (BTF3)|822 (CAPG)|831 (CAST)|839 (CASP6)|840 (CASP7)|857 (CAV1)|871 (SERPINH1)|947 (CD34)|958 (CD40)|966 (CD59)|977 (CD151)|1003 (CDH5)|1030 (CDKN2B)|1033 (CDKN3)|1163 (CKS1B)|1258 (CNGB1)|1282 (COL4A1)|1317 (SLC31A1)|1378…
		EC	GO|GO.BP	GO:0060562	epithelial tube morphogenesis	3.06532e-07	0.0349324	20	94 (ACVRL1)|1282 (COL4A1)|2022 (ENG)|3911 (LAMA5)|5420 (PODXL)|5979 (RET)|6788 (STK3)|6909 (TBX2)|6926 (TBX3)|7547 (ZIC3)|8323 (FZD6)|8463 (TEAD2)|10395 (DLC1)|25865 (PRKD2)|51176 (LEF1)|54567 (DLL4)|64321 (SOX17)|79191 (IRX3)|90627 (STARD13)|219736 (STOX1)
		EC	GO|GO.BP	GO:0045216	cell-cell junction organization	3.15902e-07	0.0360002	14	81 (ACTN4)|389 (RHOC)|857 (CAV1)|1003 (CDH5)|1495 (CTNNA1)|2701 (GJA4)|2702 (GJA5)|5583 (PRKCH)|6591 (SNAI2)|7122 (CLDN5)|51599 (LSR)|57493 (HEG1)|153562 (MARVELD2)|100506658 (OCLN)
		EC	GO|GO.CC	GO:0031091	platelet alpha granule	3.17755e-07	0.0362114	11	81 (ACTN4)|2335 (FN1)|5175 (PECAM1)|5265 (SERPINA1)|5552 (SRGN)|7076 (TIMP1)|7424 (VEGFC)|7450 (VWF)|22915 (MMRN1)|94121 (SYTL4)|135228 (CD109)
		EC	GO|GO.BP	GO:0045446	endothelial cell differentiation	3.18724e-07	0.0363218	12	94 (ACVRL1)|182 (JAG1)|302 (ANXA2)|1003 (CDH5)|2022 (ENG)|3911 (LAMA5)|5175 (PECAM1)|7122 (CLDN5)|57493 (HEG1)|64321 (SOX17)|81575 (APOLD1)|153562 (MARVELD2)
		EC	GO|GO.CC	GO:0016021	integral component of membrane	3.33343e-07	0.0379877	130	94 (ACVRL1)|182 (JAG1)|187 (APLNR)|368 (ABCC6)|682 (BSG)|857 (CAV1)|947 (CD34)|958 (CD40)|977 (CD151)|1003 (CDH5)|1258 (CNGB1)|1317 (SLC31A1)|1349 (COX7B)|1378 (CR1)|1889 (ECE1)|2012 (EMP1)|2050 (EPHB4)|2321 (FLT1)|2324 (FLT4)|2615 (LRRC32)|2701 (GJA4)|2702 (GJA5)|2826 (CCR10)|2828 (GPR4)|3356 (HTR2A)|3384 (ICAM2)|3454 (IFNAR1)|3480 (IGF1R)|3554 (IL1R1)|3672 (ITGA1)|3688 (ITGB1)|3764 (KCNJ8)|3784…
		EC	GO|GO.CC	GO:0042383	sarcolemma	3.35926e-07	0.0382821	13	301 (ANXA1)|302 (ANXA2)|633 (BGN)|682 (BSG)|857 (CAV1)|3688 (ITGB1)|3764 (KCNJ8)|6513 (SLC2A1)|7402 (UTRN)|7779 (SLC30A1)|10060 (ABCC9)|54407 (SLC38A2)|79026 (AHNAK)
		EC	GO|GO.CC	GO:0098590	plasma membrane region	3.40976e-07	0.0388576	44	182 (JAG1)|301 (ANXA1)|302 (ANXA2)|368 (ABCC6)|389 (RHOC)|857 (CAV1)|947 (CD34)|1258 (CNGB1)|1495 (CTNNA1)|2335 (FN1)|3356 (HTR2A)|3384 (ICAM2)|3688 (ITGB1)|3717 (JAK2)|3784 (KCNQ1)|3953 (LEPR)|4846 (NOS3)|4935 (GPR143)|5002 (SLC22A18)|5243 (ABCB1)|5420 (PODXL)|5871 (MAP4K2)|6513 (SLC2A1)|7010 (TEK)|7035 (TFPI)|7056 (THBD)|7074 (TIAM1)|7122 (CLDN5)|7402 (UTRN)|7779 (SLC30A1)|8323 (FZD6)|9180 (OSM…
		EC	GO|GO.BP	GO:0010647	positive regulation of cell communication	3.61554e-07	0.0412027	58	81 (ACTN4)|94 (ACVRL1)|182 (JAG1)|389 (RHOC)|857 (CAV1)|958 (CD40)|1030 (CDKN2B)|1495 (CTNNA1)|1848 (DUSP6)|2022 (ENG)|2050 (EPHB4)|2321 (FLT1)|2324 (FLT4)|2702 (GJA5)|2828 (GPR4)|2886 (GRB7)|3090 (HIC1)|3356 (HTR2A)|3480 (IGF1R)|3554 (IL1R1)|3665 (IRF7)|3672 (ITGA1)|3688 (ITGB1)|3717 (JAK2)|3987 (LIMS1)|4487 (MSX1)|4881 (NPR1)|5175 (PECAM1)|5583 (PRKCH)|5871 (MAP4K2)|5979 (RET)|6788 (STK3)|7010 …
		M	GO|GO.BP	GO:0001775	cell activation	9.45095e-42	1.07703e-36	99	60 (ACTB)|602 (BCL3)|718 (C3)|719 (C3AR1)|728 (C5AR1)|923 (CD6)|929 (CD14)|963 (CD53)|1050 (CEBPA)|1051 (CEBPB)|1435 (CSF1)|1445 (CSK)|1471 (CST3)|1509 (CTSD)|1520 (CTSS)|1522 (CTSZ)|2000 (ELF4)|2207 (FCER1G)|2212 (FCGR2A)|2215 (FCGR3B)|2242 (FES)|2268 (FGR)|2357 (FPR1)|2683 (B4GALT1)|2799 (GNS)|2896 (GRN)|3077 (HFE)|3101 (HK3)|3162 (HMOX1)|3383 (ICAM1)|3566 (IL4R)|3570 (IL6R)|3635 (INPP5D)|3659 …
		M	GO|GO.BP	GO:0006955	immune response	6.65259e-40	7.58129e-35	119	60 (ACTB)|602 (BCL3)|713 (C1QB)|714 (C1QC)|718 (C3)|719 (C3AR1)|728 (C5AR1)|834 (CASP1)|923 (CD6)|929 (CD14)|963 (CD53)|1051 (CEBPB)|1230 (CCR1)|1435 (CSF1)|1445 (CSK)|1471 (CST3)|1509 (CTSD)|1520 (CTSS)|1522 (CTSZ)|2000 (ELF4)|2099 (ESR1)|2207 (FCER1G)|2212 (FCGR2A)|2215 (FCGR3B)|2242 (FES)|2268 (FGR)|2357 (FPR1)|2683 (B4GALT1)|2799 (GNS)|2896 (GRN)|3077 (HFE)|3101 (HK3)|3162 (HMOX1)|3383 (ICAM1…
		M	GO|GO.BP	GO:0002376	immune system process	2.38268e-39	2.7153e-34	140	60 (ACTB)|602 (BCL3)|713 (C1QB)|714 (C1QC)|718 (C3)|719 (C3AR1)|728 (C5AR1)|834 (CASP1)|923 (CD6)|929 (CD14)|963 (CD53)|1050 (CEBPA)|1051 (CEBPB)|1230 (CCR1)|1435 (CSF1)|1445 (CSK)|1471 (CST3)|1509 (CTSD)|1520 (CTSS)|1522 (CTSZ)|1777 (DNASE2)|2000 (ELF4)|2099 (ESR1)|2207 (FCER1G)|2212 (FCGR2A)|2215 (FCGR3B)|2242 (FES)|2268 (FGR)|2357 (FPR1)|2683 (B4GALT1)|2799 (GNS)|2872 (MKNK2)|2896 (GRN)|3059 (…
		M	GO|GO.BP	GO:0045321	leukocyte activation	2.35358e-37	2.68214e-32	89	602 (BCL3)|718 (C3)|719 (C3AR1)|728 (C5AR1)|923 (CD6)|929 (CD14)|963 (CD53)|1050 (CEBPA)|1051 (CEBPB)|1435 (CSF1)|1445 (CSK)|1471 (CST3)|1509 (CTSD)|1520 (CTSS)|1522 (CTSZ)|2000 (ELF4)|2207 (FCER1G)|2212 (FCGR2A)|2215 (FCGR3B)|2242 (FES)|2268 (FGR)|2357 (FPR1)|2683 (B4GALT1)|2799 (GNS)|2896 (GRN)|3077 (HFE)|3101 (HK3)|3162 (HMOX1)|3383 (ICAM1)|3566 (IL4R)|3570 (IL6R)|3635 (INPP5D)|3659 (IRF1)|368…
		M	GO|GO.BP	GO:0006952	defense response	4.51878e-34	5.14961e-29	97	140 (ADORA3)|215 (ABCD1)|602 (BCL3)|713 (C1QB)|714 (C1QC)|718 (C3)|719 (C3AR1)|728 (C5AR1)|834 (CASP1)|923 (CD6)|929 (CD14)|1050 (CEBPA)|1051 (CEBPB)|1230 (CCR1)|1435 (CSF1)|1471 (CST3)|1520 (CTSS)|2000 (ELF4)|2099 (ESR1)|2207 (FCER1G)|2268 (FGR)|2357 (FPR1)|2683 (B4GALT1)|2687 (GGT5)|3077 (HFE)|3162 (HMOX1)|3383 (ICAM1)|3459 (IFNGR1)|3566 (IL4R)|3570 (IL6R)|3659 (IRF1)|3689 (ITGB2)|3958 (LGALS3)…
		M	GO|GO.BP	GO:0002366	leukocyte activation involved in immune response	6.2555e-32	7.12876e-27	63	602 (BCL3)|718 (C3)|719 (C3AR1)|728 (C5AR1)|929 (CD14)|963 (CD53)|1471 (CST3)|1509 (CTSD)|1520 (CTSS)|1522 (CTSZ)|2207 (FCER1G)|2212 (FCGR2A)|2215 (FCGR3B)|2242 (FES)|2268 (FGR)|2357 (FPR1)|2683 (B4GALT1)|2799 (GNS)|2896 (GRN)|3101 (HK3)|3162 (HMOX1)|3383 (ICAM1)|3566 (IL4R)|3689 (ITGB2)|3955 (LFNG)|3956 (LGALS1)|3958 (LGALS3)|4057 (LTF)|4067 (LYN)|4353 (MPO)|4860 (PNP)|5199 (CFP)|5580 (PRKCD)|57…
		M	GO|GO.BP	GO:0002263	cell activation involved in immune response	8.70316e-32	9.91812e-27	63	602 (BCL3)|718 (C3)|719 (C3AR1)|728 (C5AR1)|929 (CD14)|963 (CD53)|1471 (CST3)|1509 (CTSD)|1520 (CTSS)|1522 (CTSZ)|2207 (FCER1G)|2212 (FCGR2A)|2215 (FCGR3B)|2242 (FES)|2268 (FGR)|2357 (FPR1)|2683 (B4GALT1)|2799 (GNS)|2896 (GRN)|3101 (HK3)|3162 (HMOX1)|3383 (ICAM1)|3566 (IL4R)|3689 (ITGB2)|3955 (LFNG)|3956 (LGALS1)|3958 (LGALS3)|4057 (LTF)|4067 (LYN)|4353 (MPO)|4860 (PNP)|5199 (CFP)|5580 (PRKCD)|57…
		M	GO|GO.BP	GO:0002274	myeloid leukocyte activation	2.50305e-31	2.85248e-26	60	718 (C3)|719 (C3AR1)|728 (C5AR1)|929 (CD14)|963 (CD53)|1050 (CEBPA)|1435 (CSF1)|1471 (CST3)|1509 (CTSD)|1520 (CTSS)|1522 (CTSZ)|2207 (FCER1G)|2212 (FCGR2A)|2215 (FCGR3B)|2242 (FES)|2268 (FGR)|2357 (FPR1)|2683 (B4GALT1)|2799 (GNS)|2896 (GRN)|3101 (HK3)|3162 (HMOX1)|3566 (IL4R)|3689 (ITGB2)|3937 (LCP2)|3958 (LGALS3)|4057 (LTF)|4067 (LYN)|4353 (MPO)|4860 (PNP)|5199 (CFP)|5580 (PRKCD)|5788 (PTPRC)|58…
		M	GO|GO.BP	GO:0002684	positive regulation of immune system process	6.81044e-31	7.76118e-26	76	60 (ACTB)|713 (C1QB)|714 (C1QC)|718 (C3)|719 (C3AR1)|728 (C5AR1)|923 (CD6)|929 (CD14)|1050 (CEBPA)|1230 (CCR1)|1435 (CSF1)|1445 (CSK)|1520 (CTSS)|2099 (ESR1)|2207 (FCER1G)|2212 (FCGR2A)|2242 (FES)|2268 (FGR)|2357 (FPR1)|3059 (HCLS1)|3077 (HFE)|3162 (HMOX1)|3383 (ICAM1)|3566 (IL4R)|3570 (IL6R)|3635 (INPP5D)|3659 (IRF1)|3689 (ITGB2)|3937 (LCP2)|3956 (LGALS1)|3958 (LGALS3)|4057 (LTF)|4067 (LYN)|4615…
		M	GO|GO.BP	GO:0002252	immune effector process	2.3234e-30	2.64775e-25	80	60 (ACTB)|602 (BCL3)|713 (C1QB)|714 (C1QC)|718 (C3)|719 (C3AR1)|728 (C5AR1)|929 (CD14)|963 (CD53)|1471 (CST3)|1509 (CTSD)|1520 (CTSS)|1522 (CTSZ)|2207 (FCER1G)|2212 (FCGR2A)|2215 (FCGR3B)|2242 (FES)|2268 (FGR)|2357 (FPR1)|2683 (B4GALT1)|2799 (GNS)|2896 (GRN)|3077 (HFE)|3101 (HK3)|3162 (HMOX1)|3383 (ICAM1)|3566 (IL4R)|3635 (INPP5D)|3659 (IRF1)|3689 (ITGB2)|3955 (LFNG)|3956 (LGALS1)|3958 (LGALS3)|4…
		M	GO|GO.BP	GO:0002275	myeloid cell activation involved in immune response	1.70248e-29	1.94014e-24	54	718 (C3)|719 (C3AR1)|728 (C5AR1)|929 (CD14)|963 (CD53)|1471 (CST3)|1509 (CTSD)|1520 (CTSS)|1522 (CTSZ)|2207 (FCER1G)|2212 (FCGR2A)|2215 (FCGR3B)|2242 (FES)|2268 (FGR)|2357 (FPR1)|2683 (B4GALT1)|2799 (GNS)|2896 (GRN)|3101 (HK3)|3162 (HMOX1)|3566 (IL4R)|3689 (ITGB2)|3958 (LGALS3)|4057 (LTF)|4067 (LYN)|4353 (MPO)|4860 (PNP)|5199 (CFP)|5580 (PRKCD)|5788 (PTPRC)|5880 (RAC2)|6279 (S100A8)|6280 (S100A9)…
		M	GO|GO.BP	GO:0006954	inflammatory response	2.76952e-28	3.15614e-23	62	140 (ADORA3)|215 (ABCD1)|713 (C1QB)|714 (C1QC)|718 (C3)|719 (C3AR1)|728 (C5AR1)|923 (CD6)|929 (CD14)|1050 (CEBPA)|1051 (CEBPB)|1230 (CCR1)|1435 (CSF1)|2099 (ESR1)|2207 (FCER1G)|2357 (FPR1)|2683 (B4GALT1)|2687 (GGT5)|3077 (HFE)|3162 (HMOX1)|3383 (ICAM1)|3566 (IL4R)|3570 (IL6R)|3689 (ITGB2)|4067 (LYN)|4615 (MYD88)|5054 (SERPINE1)|5199 (CFP)|5580 (PRKCD)|5606 (MAP2K3)|5788 (PTPRC)|5970 (RELA)|6279 (…
		M	GO|GO.BP	GO:0002444	myeloid leukocyte mediated immunity	3.10842e-28	3.54235e-23	53	718 (C3)|719 (C3AR1)|728 (C5AR1)|929 (CD14)|963 (CD53)|1471 (CST3)|1509 (CTSD)|1520 (CTSS)|1522 (CTSZ)|2207 (FCER1G)|2212 (FCGR2A)|2215 (FCGR3B)|2242 (FES)|2268 (FGR)|2357 (FPR1)|2683 (B4GALT1)|2799 (GNS)|2896 (GRN)|3101 (HK3)|3162 (HMOX1)|3566 (IL4R)|3689 (ITGB2)|3958 (LGALS3)|4057 (LTF)|4067 (LYN)|4353 (MPO)|4860 (PNP)|5199 (CFP)|5580 (PRKCD)|5788 (PTPRC)|5880 (RAC2)|6279 (S100A8)|6280 (S100A9)…
		M	GO|GO.BP	GO:0002443	leukocyte mediated immunity	3.40902e-28	3.88492e-23	65	602 (BCL3)|713 (C1QB)|714 (C1QC)|718 (C3)|719 (C3AR1)|728 (C5AR1)|929 (CD14)|963 (CD53)|1471 (CST3)|1509 (CTSD)|1520 (CTSS)|1522 (CTSZ)|2207 (FCER1G)|2212 (FCGR2A)|2215 (FCGR3B)|2242 (FES)|2268 (FGR)|2357 (FPR1)|2683 (B4GALT1)|2799 (GNS)|2896 (GRN)|3077 (HFE)|3101 (HK3)|3162 (HMOX1)|3383 (ICAM1)|3566 (IL4R)|3635 (INPP5D)|3689 (ITGB2)|3958 (LGALS3)|4057 (LTF)|4067 (LYN)|4353 (MPO)|4860 (PNP)|5199 …
		M	GO|GO.BP	GO:0043299	leukocyte degranulation	5.82536e-28	6.63858e-23	52	718 (C3)|719 (C3AR1)|728 (C5AR1)|929 (CD14)|963 (CD53)|1471 (CST3)|1509 (CTSD)|1520 (CTSS)|1522 (CTSZ)|2207 (FCER1G)|2212 (FCGR2A)|2215 (FCGR3B)|2242 (FES)|2268 (FGR)|2357 (FPR1)|2683 (B4GALT1)|2799 (GNS)|2896 (GRN)|3101 (HK3)|3162 (HMOX1)|3566 (IL4R)|3689 (ITGB2)|3958 (LGALS3)|4057 (LTF)|4067 (LYN)|4353 (MPO)|4860 (PNP)|5199 (CFP)|5580 (PRKCD)|5788 (PTPRC)|5880 (RAC2)|6279 (S100A8)|6280 (S100A9)…
		M	GO|GO.BP	GO:0002682	regulation of immune system process	6.85978e-27	7.8174e-22	84	60 (ACTB)|713 (C1QB)|714 (C1QC)|718 (C3)|719 (C3AR1)|728 (C5AR1)|923 (CD6)|929 (CD14)|1050 (CEBPA)|1051 (CEBPB)|1230 (CCR1)|1435 (CSF1)|1445 (CSK)|1520 (CTSS)|2099 (ESR1)|2207 (FCER1G)|2212 (FCGR2A)|2242 (FES)|2268 (FGR)|2357 (FPR1)|3059 (HCLS1)|3077 (HFE)|3162 (HMOX1)|3383 (ICAM1)|3459 (IFNGR1)|3566 (IL4R)|3570 (IL6R)|3635 (INPP5D)|3659 (IRF1)|3689 (ITGB2)|3937 (LCP2)|3956 (LGALS1)|3958 (LGALS3)…
		M	GO|GO.BP	GO:0050896	response to stimulus	1.06844e-25	1.21759e-20	222	60 (ACTB)|140 (ADORA3)|154 (ADRB2)|215 (ABCD1)|241 (ALOX5AP)|463 (ZFHX3)|598 (BCL2L1)|602 (BCL3)|637 (BID)|694 (BTG1)|713 (C1QB)|714 (C1QC)|718 (C3)|719 (C3AR1)|728 (C5AR1)|834 (CASP1)|923 (CD6)|929 (CD14)|963 (CD53)|1040 (CDS1)|1050 (CEBPA)|1051 (CEBPB)|1230 (CCR1)|1435 (CSF1)|1439 (CSF2RB)|1445 (CSK)|1471 (CST3)|1509 (CTSD)|1520 (CTSS)|1522 (CTSZ)|1796 (DOK1)|1820 (ARID3A)|2000 (ELF4)|2099 (ESR…
		M	GO|GO.BP	GO:0050776	regulation of immune response	5.75883e-25	6.56276e-20	66	60 (ACTB)|713 (C1QB)|714 (C1QC)|718 (C3)|719 (C3AR1)|728 (C5AR1)|929 (CD14)|1445 (CSK)|1520 (CTSS)|2099 (ESR1)|2207 (FCER1G)|2212 (FCGR2A)|2242 (FES)|2268 (FGR)|2357 (FPR1)|3077 (HFE)|3162 (HMOX1)|3383 (ICAM1)|3459 (IFNGR1)|3566 (IL4R)|3570 (IL6R)|3635 (INPP5D)|3659 (IRF1)|3689 (ITGB2)|3937 (LCP2)|3958 (LGALS3)|4057 (LTF)|4067 (LYN)|4615 (MYD88)|5199 (CFP)|5580 (PRKCD)|5788 (PTPRC)|5880 (RAC2)|59…
		M	GO|GO.BP	GO:0045055	regulated exocytosis	1.00677e-24	1.14732e-19	58	718 (C3)|719 (C3AR1)|728 (C5AR1)|929 (CD14)|963 (CD53)|1471 (CST3)|1509 (CTSD)|1520 (CTSS)|1522 (CTSZ)|2162 (F13A1)|2207 (FCER1G)|2212 (FCGR2A)|2215 (FCGR3B)|2242 (FES)|2268 (FGR)|2357 (FPR1)|2683 (B4GALT1)|2799 (GNS)|2896 (GRN)|3101 (HK3)|3162 (HMOX1)|3566 (IL4R)|3689 (ITGB2)|3958 (LGALS3)|4057 (LTF)|4067 (LYN)|4353 (MPO)|4860 (PNP)|5054 (SERPINE1)|5199 (CFP)|5341 (PLEK)|5580 (PRKCD)|5788 (PTPRC…
		M	GO|GO.BP	GO:0006950	response to stress	1.94162e-24	2.21267e-19	134	60 (ACTB)|140 (ADORA3)|154 (ADRB2)|215 (ABCD1)|598 (BCL2L1)|602 (BCL3)|637 (BID)|694 (BTG1)|713 (C1QB)|714 (C1QC)|718 (C3)|719 (C3AR1)|728 (C5AR1)|834 (CASP1)|923 (CD6)|929 (CD14)|1050 (CEBPA)|1051 (CEBPB)|1230 (CCR1)|1435 (CSF1)|1471 (CST3)|1520 (CTSS)|1820 (ARID3A)|2000 (ELF4)|2099 (ESR1)|2162 (F13A1)|2207 (FCER1G)|2268 (FGR)|2357 (FPR1)|2683 (B4GALT1)|2687 (GGT5)|3077 (HFE)|3099 (HK2)|3162 (HM…
		M	GO|GO.BP	GO:0048584	positive regulation of response to stimulus	2.4521e-24	2.79441e-19	101	60 (ACTB)|154 (ADRB2)|598 (BCL2L1)|637 (BID)|713 (C1QB)|714 (C1QC)|718 (C3)|719 (C3AR1)|728 (C5AR1)|834 (CASP1)|923 (CD6)|929 (CD14)|1050 (CEBPA)|1230 (CCR1)|1435 (CSF1)|1445 (CSK)|1520 (CTSS)|1796 (DOK1)|2099 (ESR1)|2207 (FCER1G)|2212 (FCGR2A)|2268 (FGR)|2357 (FPR1)|3059 (HCLS1)|3077 (HFE)|3162 (HMOX1)|3383 (ICAM1)|3566 (IL4R)|3570 (IL6R)|3635 (INPP5D)|3659 (IRF1)|3689 (ITGB2)|3927 (LASP1)|3937 …
		M	GO|GO.BP	GO:0001816	cytokine production	2.47971e-24	2.82587e-19	55	215 (ABCD1)|602 (BCL3)|718 (C3)|719 (C3AR1)|728 (C5AR1)|834 (CASP1)|923 (CD6)|929 (CD14)|1051 (CEBPB)|1445 (CSK)|2207 (FCER1G)|2268 (FGR)|3077 (HFE)|3162 (HMOX1)|3566 (IL4R)|3570 (IL6R)|3635 (INPP5D)|3659 (IRF1)|3937 (LCP2)|4057 (LTF)|4067 (LYN)|4615 (MYD88)|4791 (NFKB2)|4860 (PNP)|5045 (FURIN)|5054 (SERPINE1)|5580 (PRKCD)|5606 (MAP2K3)|5788 (PTPRC)|5970 (RELA)|6279 (S100A8)|6280 (S100A9)|6693 (S…
		M	GO|GO.BP	GO:0006887	exocytosis	1.97007e-23	2.24509e-18	60	718 (C3)|719 (C3AR1)|728 (C5AR1)|929 (CD14)|963 (CD53)|1230 (CCR1)|1471 (CST3)|1509 (CTSD)|1520 (CTSS)|1522 (CTSZ)|2162 (F13A1)|2207 (FCER1G)|2212 (FCGR2A)|2215 (FCGR3B)|2242 (FES)|2268 (FGR)|2357 (FPR1)|2683 (B4GALT1)|2799 (GNS)|2896 (GRN)|3101 (HK3)|3162 (HMOX1)|3566 (IL4R)|3689 (ITGB2)|3958 (LGALS3)|4057 (LTF)|4067 (LYN)|4353 (MPO)|4860 (PNP)|5054 (SERPINE1)|5199 (CFP)|5341 (PLEK)|5580 (PRKCD)…
		M	GO|GO.BP	GO:0043312	neutrophil degranulation	2.93647e-23	3.3464e-18	45	718 (C3)|719 (C3AR1)|728 (C5AR1)|929 (CD14)|963 (CD53)|1471 (CST3)|1509 (CTSD)|1520 (CTSS)|1522 (CTSZ)|2207 (FCER1G)|2212 (FCGR2A)|2215 (FCGR3B)|2268 (FGR)|2357 (FPR1)|2683 (B4GALT1)|2799 (GNS)|2896 (GRN)|3101 (HK3)|3689 (ITGB2)|3958 (LGALS3)|4057 (LTF)|4353 (MPO)|4860 (PNP)|5199 (CFP)|5580 (PRKCD)|5788 (PTPRC)|6279 (S100A8)|6280 (S100A9)|7097 (TLR2)|7133 (TNFRSF1B)|7305 (TYROBP)|8673 (VAMP8)|914…
		M	GO|GO.BP	GO:0002283	neutrophil activation involved in immune response	3.78312e-23	4.31125e-18	45	718 (C3)|719 (C3AR1)|728 (C5AR1)|929 (CD14)|963 (CD53)|1471 (CST3)|1509 (CTSD)|1520 (CTSS)|1522 (CTSZ)|2207 (FCER1G)|2212 (FCGR2A)|2215 (FCGR3B)|2268 (FGR)|2357 (FPR1)|2683 (B4GALT1)|2799 (GNS)|2896 (GRN)|3101 (HK3)|3689 (ITGB2)|3958 (LGALS3)|4057 (LTF)|4353 (MPO)|4860 (PNP)|5199 (CFP)|5580 (PRKCD)|5788 (PTPRC)|6279 (S100A8)|6280 (S100A9)|7097 (TLR2)|7133 (TNFRSF1B)|7305 (TYROBP)|8673 (VAMP8)|914…
		M	GO|GO.BP	GO:0016192	vesicle-mediated transport	8.13883e-23	9.27501e-18	91	60 (ACTB)|154 (ADRB2)|598 (BCL2L1)|718 (C3)|719 (C3AR1)|728 (C5AR1)|923 (CD6)|929 (CD14)|963 (CD53)|1230 (CCR1)|1445 (CSK)|1471 (CST3)|1509 (CTSD)|1520 (CTSS)|1522 (CTSZ)|2162 (F13A1)|2207 (FCER1G)|2212 (FCGR2A)|2215 (FCGR3B)|2242 (FES)|2268 (FGR)|2357 (FPR1)|2683 (B4GALT1)|2799 (GNS)|2896 (GRN)|3077 (HFE)|3101 (HK3)|3162 (HMOX1)|3566 (IL4R)|3689 (ITGB2)|3958 (LGALS3)|4057 (LTF)|4067 (LYN)|4353 (…
		M	GO|GO.BP	GO:0042119	neutrophil activation	8.68525e-23	9.89771e-18	45	718 (C3)|719 (C3AR1)|728 (C5AR1)|929 (CD14)|963 (CD53)|1471 (CST3)|1509 (CTSD)|1520 (CTSS)|1522 (CTSZ)|2207 (FCER1G)|2212 (FCGR2A)|2215 (FCGR3B)|2268 (FGR)|2357 (FPR1)|2683 (B4GALT1)|2799 (GNS)|2896 (GRN)|3101 (HK3)|3689 (ITGB2)|3958 (LGALS3)|4057 (LTF)|4353 (MPO)|4860 (PNP)|5199 (CFP)|5580 (PRKCD)|5788 (PTPRC)|6279 (S100A8)|6280 (S100A9)|7097 (TLR2)|7133 (TNFRSF1B)|7305 (TYROBP)|8673 (VAMP8)|914…
		M	GO|GO.BP	GO:0002446	neutrophil mediated immunity	9.42742e-23	1.07435e-17	45	718 (C3)|719 (C3AR1)|728 (C5AR1)|929 (CD14)|963 (CD53)|1471 (CST3)|1509 (CTSD)|1520 (CTSS)|1522 (CTSZ)|2207 (FCER1G)|2212 (FCGR2A)|2215 (FCGR3B)|2268 (FGR)|2357 (FPR1)|2683 (B4GALT1)|2799 (GNS)|2896 (GRN)|3101 (HK3)|3689 (ITGB2)|3958 (LGALS3)|4057 (LTF)|4353 (MPO)|4860 (PNP)|5199 (CFP)|5580 (PRKCD)|5788 (PTPRC)|6279 (S100A8)|6280 (S100A9)|7097 (TLR2)|7133 (TNFRSF1B)|7305 (TYROBP)|8673 (VAMP8)|914…
		M	GO|GO.BP	GO:0036230	granulocyte activation	1.53552e-22	1.74988e-17	45	718 (C3)|719 (C3AR1)|728 (C5AR1)|929 (CD14)|963 (CD53)|1471 (CST3)|1509 (CTSD)|1520 (CTSS)|1522 (CTSZ)|2207 (FCER1G)|2212 (FCGR2A)|2215 (FCGR3B)|2268 (FGR)|2357 (FPR1)|2683 (B4GALT1)|2799 (GNS)|2896 (GRN)|3101 (HK3)|3689 (ITGB2)|3958 (LGALS3)|4057 (LTF)|4353 (MPO)|4860 (PNP)|5199 (CFP)|5580 (PRKCD)|5788 (PTPRC)|6279 (S100A8)|6280 (S100A9)|7097 (TLR2)|7133 (TNFRSF1B)|7305 (TYROBP)|8673 (VAMP8)|914…
		M	GO|GO.BP	GO:0046903	secretion	2.74808e-22	3.13171e-17	79	718 (C3)|719 (C3AR1)|728 (C5AR1)|834 (CASP1)|929 (CD14)|963 (CD53)|1230 (CCR1)|1471 (CST3)|1509 (CTSD)|1520 (CTSS)|1522 (CTSZ)|2162 (F13A1)|2207 (FCER1G)|2212 (FCGR2A)|2215 (FCGR3B)|2242 (FES)|2268 (FGR)|2357 (FPR1)|2683 (B4GALT1)|2799 (GNS)|2896 (GRN)|3077 (HFE)|3099 (HK2)|3101 (HK3)|3162 (HMOX1)|3566 (IL4R)|3689 (ITGB2)|3937 (LCP2)|3958 (LGALS3)|4057 (LTF)|4067 (LYN)|4353 (MPO)|4860 (PNP)|4939 …
		M	GO|GO.BP	GO:0001817	regulation of cytokine production	3.03673e-22	3.46066e-17	50	215 (ABCD1)|602 (BCL3)|718 (C3)|719 (C3AR1)|728 (C5AR1)|834 (CASP1)|923 (CD6)|929 (CD14)|1051 (CEBPB)|1445 (CSK)|2207 (FCER1G)|2268 (FGR)|3077 (HFE)|3162 (HMOX1)|3566 (IL4R)|3570 (IL6R)|3635 (INPP5D)|3659 (IRF1)|4057 (LTF)|4067 (LYN)|4615 (MYD88)|4791 (NFKB2)|5045 (FURIN)|5054 (SERPINE1)|5606 (MAP2K3)|5788 (PTPRC)|5970 (RELA)|6693 (SPN)|6778 (STAT6)|7040 (TGFB1)|7096 (TLR1)|7097 (TLR2)|7100 (TLR5…
		M	GO|GO.BP	GO:0050778	positive regulation of immune response	3.25062e-22	3.70441e-17	56	60 (ACTB)|713 (C1QB)|714 (C1QC)|718 (C3)|719 (C3AR1)|728 (C5AR1)|929 (CD14)|1445 (CSK)|1520 (CTSS)|2099 (ESR1)|2207 (FCER1G)|2212 (FCGR2A)|2268 (FGR)|2357 (FPR1)|3077 (HFE)|3566 (IL4R)|3570 (IL6R)|3635 (INPP5D)|3659 (IRF1)|3689 (ITGB2)|3937 (LCP2)|3958 (LGALS3)|4057 (LTF)|4067 (LYN)|4615 (MYD88)|5199 (CFP)|5580 (PRKCD)|5788 (PTPRC)|5970 (RELA)|6279 (S100A8)|6280 (S100A9)|6778 (STAT6)|7040 (TGFB1)…
		M	GO|GO.BP	GO:0032940	secretion by cell	2.2321e-21	2.54371e-16	74	718 (C3)|719 (C3AR1)|728 (C5AR1)|834 (CASP1)|929 (CD14)|963 (CD53)|1230 (CCR1)|1471 (CST3)|1509 (CTSD)|1520 (CTSS)|1522 (CTSZ)|2162 (F13A1)|2207 (FCER1G)|2212 (FCGR2A)|2215 (FCGR3B)|2242 (FES)|2268 (FGR)|2357 (FPR1)|2683 (B4GALT1)|2799 (GNS)|2896 (GRN)|3077 (HFE)|3101 (HK3)|3162 (HMOX1)|3566 (IL4R)|3689 (ITGB2)|3937 (LCP2)|3958 (LGALS3)|4057 (LTF)|4067 (LYN)|4353 (MPO)|4860 (PNP)|5045 (FURIN)|505…
		M	GO|GO.BP	GO:0045087	innate immune response	6.36147e-21	7.24953e-16	57	713 (C1QB)|714 (C1QC)|718 (C3)|834 (CASP1)|923 (CD6)|929 (CD14)|1435 (CSF1)|1520 (CTSS)|2000 (ELF4)|2099 (ESR1)|2207 (FCER1G)|2268 (FGR)|3077 (HFE)|3383 (ICAM1)|3459 (IFNGR1)|3659 (IRF1)|3689 (ITGB2)|3958 (LGALS3)|4057 (LTF)|4067 (LYN)|4615 (MYD88)|4688 (NCF2)|4939 (OAS2)|5199 (CFP)|5580 (PRKCD)|5696 (PSMB8)|5970 (RELA)|6039 (RNASE6)|6279 (S100A8)|6280 (S100A9)|6347 (CCL2)|7040 (TGFB1)|7096 (TLR1…
		M	GO|GO.BP	GO:0002253	activation of immune response	1.11744e-20	1.27343e-15	48	60 (ACTB)|713 (C1QB)|714 (C1QC)|718 (C3)|719 (C3AR1)|728 (C5AR1)|929 (CD14)|1445 (CSK)|1520 (CTSS)|2099 (ESR1)|2207 (FCER1G)|2212 (FCGR2A)|2268 (FGR)|2357 (FPR1)|3635 (INPP5D)|3659 (IRF1)|3689 (ITGB2)|3937 (LCP2)|3958 (LGALS3)|4057 (LTF)|4067 (LYN)|4615 (MYD88)|5199 (CFP)|5580 (PRKCD)|5788 (PTPRC)|5970 (RELA)|6279 (S100A8)|6280 (S100A9)|7096 (TLR1)|7097 (TLR2)|7100 (TLR5)|7128 (TNFAIP3)|7462 (LAT…
		M	GO|GO.CC	GO:0031982	vesicle	6.37274e-20	7.26237e-15	124	60 (ACTB)|154 (ADRB2)|598 (BCL2L1)|718 (C3)|719 (C3AR1)|728 (C5AR1)|752 (FMNL1)|929 (CD14)|963 (CD53)|1293 (COL6A3)|1445 (CSK)|1471 (CST3)|1509 (CTSD)|1520 (CTSS)|1522 (CTSZ)|1777 (DNASE2)|2162 (F13A1)|2207 (FCER1G)|2212 (FCGR2A)|2215 (FCGR3B)|2242 (FES)|2268 (FGR)|2289 (FKBP5)|2357 (FPR1)|2683 (B4GALT1)|2799 (GNS)|2896 (GRN)|3017 (HIST1H2BD)|3073 (HEXA)|3077 (HFE)|3101 (HK3)|3383 (ICAM1)|3689 (I…
		M	GO|GO.BP	GO:0031347	regulation of defense response	7.4183e-20	8.4539e-15	51	215 (ABCD1)|713 (C1QB)|714 (C1QC)|718 (C3)|719 (C3AR1)|728 (C5AR1)|923 (CD6)|929 (CD14)|1050 (CEBPA)|1520 (CTSS)|2099 (ESR1)|2207 (FCER1G)|2268 (FGR)|3077 (HFE)|3459 (IFNGR1)|3659 (IRF1)|3689 (ITGB2)|4057 (LTF)|4067 (LYN)|4615 (MYD88)|5054 (SERPINE1)|5199 (CFP)|5580 (PRKCD)|5788 (PTPRC)|5970 (RELA)|6279 (S100A8)|6280 (S100A9)|7052 (TGM2)|7096 (TLR1)|7097 (TLR2)|7100 (TLR5)|7128 (TNFAIP3)|7132 (TN…
		M	GO|GO.BP	GO:0009605	response to external stimulus	8.48364e-20	9.66795e-15	94	154 (ADRB2)|215 (ABCD1)|598 (BCL2L1)|602 (BCL3)|713 (C1QB)|714 (C1QC)|718 (C3)|719 (C3AR1)|728 (C5AR1)|834 (CASP1)|923 (CD6)|929 (CD14)|1040 (CDS1)|1050 (CEBPA)|1051 (CEBPB)|1230 (CCR1)|1435 (CSF1)|1439 (CSF2RB)|1796 (DOK1)|2099 (ESR1)|2207 (FCER1G)|2242 (FES)|2268 (FGR)|2289 (FKBP5)|2357 (FPR1)|3077 (HFE)|3162 (HMOX1)|3383 (ICAM1)|3459 (IFNGR1)|3566 (IL4R)|3570 (IL6R)|3659 (IRF1)|3689 (ITGB2)|39…
		M	GO|GO.BP	GO:0009607	response to biotic stimulus	2.36002e-19	2.68947e-14	58	598 (BCL2L1)|602 (BCL3)|718 (C3)|728 (C5AR1)|834 (CASP1)|923 (CD6)|929 (CD14)|1051 (CEBPB)|1439 (CSF2RB)|2207 (FCER1G)|2268 (FGR)|2289 (FKBP5)|3383 (ICAM1)|3459 (IFNGR1)|3566 (IL4R)|3570 (IL6R)|3659 (IRF1)|4057 (LTF)|4067 (LYN)|4353 (MPO)|4615 (MYD88)|4791 (NFKB2)|4939 (OAS2)|5054 (SERPINE1)|5199 (CFP)|5580 (PRKCD)|5788 (PTPRC)|5970 (RELA)|6039 (RNASE6)|6279 (S100A8)|6280 (S100A9)|6347 (CCL2)|669…
		M	GO|GO.BP	GO:0051707	response to other organism	2.56913e-19	2.92778e-14	57	598 (BCL2L1)|602 (BCL3)|718 (C3)|728 (C5AR1)|834 (CASP1)|923 (CD6)|929 (CD14)|1051 (CEBPB)|1439 (CSF2RB)|2207 (FCER1G)|2268 (FGR)|2289 (FKBP5)|3383 (ICAM1)|3459 (IFNGR1)|3566 (IL4R)|3570 (IL6R)|3659 (IRF1)|4057 (LTF)|4067 (LYN)|4353 (MPO)|4615 (MYD88)|4791 (NFKB2)|4939 (OAS2)|5054 (SERPINE1)|5199 (CFP)|5580 (PRKCD)|5788 (PTPRC)|5970 (RELA)|6039 (RNASE6)|6279 (S100A8)|6280 (S100A9)|6347 (CCL2)|669…
		M	GO|GO.BP	GO:0043207	response to external biotic stimulus	2.82488e-19	3.21923e-14	57	598 (BCL2L1)|602 (BCL3)|718 (C3)|728 (C5AR1)|834 (CASP1)|923 (CD6)|929 (CD14)|1051 (CEBPB)|1439 (CSF2RB)|2207 (FCER1G)|2268 (FGR)|2289 (FKBP5)|3383 (ICAM1)|3459 (IFNGR1)|3566 (IL4R)|3570 (IL6R)|3659 (IRF1)|4057 (LTF)|4067 (LYN)|4353 (MPO)|4615 (MYD88)|4791 (NFKB2)|4939 (OAS2)|5054 (SERPINE1)|5199 (CFP)|5580 (PRKCD)|5788 (PTPRC)|5970 (RELA)|6039 (RNASE6)|6279 (S100A8)|6280 (S100A9)|6347 (CCL2)|669…
		M	GO|GO.BP	GO:0009617	response to bacterium	7.05018e-19	8.03439e-14	47	602 (BCL3)|718 (C3)|728 (C5AR1)|834 (CASP1)|923 (CD6)|929 (CD14)|1051 (CEBPB)|1439 (CSF2RB)|2207 (FCER1G)|2268 (FGR)|2289 (FKBP5)|3383 (ICAM1)|3570 (IL6R)|4057 (LTF)|4067 (LYN)|4353 (MPO)|4615 (MYD88)|4791 (NFKB2)|4939 (OAS2)|5054 (SERPINE1)|5199 (CFP)|5580 (PRKCD)|5970 (RELA)|6039 (RNASE6)|6279 (S100A8)|6280 (S100A9)|6347 (CCL2)|6693 (SPN)|7040 (TGFB1)|7096 (TLR1)|7097 (TLR2)|7100 (TLR5)|7128 (T…
		M	GO|GO.BP	GO:0002757	immune response-activating signal transduction	7.43893e-19	8.4774e-14	43	60 (ACTB)|719 (C3AR1)|728 (C5AR1)|929 (CD14)|1445 (CSK)|1520 (CTSS)|2099 (ESR1)|2207 (FCER1G)|2212 (FCGR2A)|2268 (FGR)|2357 (FPR1)|3635 (INPP5D)|3659 (IRF1)|3689 (ITGB2)|3937 (LCP2)|3958 (LGALS3)|4057 (LTF)|4067 (LYN)|4615 (MYD88)|5580 (PRKCD)|5788 (PTPRC)|5970 (RELA)|6279 (S100A8)|6280 (S100A9)|7096 (TLR1)|7097 (TLR2)|7100 (TLR5)|7128 (TNFAIP3)|7462 (LAT2)|7867 (MAPKAPK3)|9261 (MAPKAPK2)|10163 (…
		M	GO|GO.BP	GO:0001819	positive regulation of cytokine production	2.04675e-18	2.33248e-13	37	602 (BCL3)|718 (C3)|719 (C3AR1)|728 (C5AR1)|834 (CASP1)|923 (CD6)|929 (CD14)|1051 (CEBPB)|2207 (FCER1G)|2268 (FGR)|3162 (HMOX1)|3566 (IL4R)|3570 (IL6R)|3659 (IRF1)|4615 (MYD88)|4791 (NFKB2)|5045 (FURIN)|5054 (SERPINE1)|5788 (PTPRC)|5970 (RELA)|6693 (SPN)|6778 (STAT6)|7040 (TGFB1)|7096 (TLR1)|7097 (TLR2)|7100 (TLR5)|8808 (IL1RL2)|9261 (MAPKAPK2)|9308 (CD83)|10148 (EBI3)|54440 (SASH3)|63906 (GPATCH…
		M	GO|GO.CC	GO:0030141	secretory granule	2.68787e-18	3.0631e-13	51	718 (C3)|719 (C3AR1)|728 (C5AR1)|929 (CD14)|963 (CD53)|1471 (CST3)|1509 (CTSD)|1520 (CTSS)|1522 (CTSZ)|2162 (F13A1)|2207 (FCER1G)|2212 (FCGR2A)|2215 (FCGR3B)|2268 (FGR)|2357 (FPR1)|2683 (B4GALT1)|2799 (GNS)|2896 (GRN)|3073 (HEXA)|3101 (HK3)|3689 (ITGB2)|3958 (LGALS3)|4057 (LTF)|4353 (MPO)|4688 (NCF2)|4860 (PNP)|5054 (SERPINE1)|5199 (CFP)|5580 (PRKCD)|5788 (PTPRC)|6279 (S100A8)|6280 (S100A9)|7040 …
		M	GO|GO.BP	GO:0002764	immune response-regulating signaling pathway	5.38661e-18	6.13858e-13	43	60 (ACTB)|719 (C3AR1)|728 (C5AR1)|929 (CD14)|1445 (CSK)|1520 (CTSS)|2099 (ESR1)|2207 (FCER1G)|2212 (FCGR2A)|2268 (FGR)|2357 (FPR1)|3635 (INPP5D)|3659 (IRF1)|3689 (ITGB2)|3937 (LCP2)|3958 (LGALS3)|4057 (LTF)|4067 (LYN)|4615 (MYD88)|5580 (PRKCD)|5788 (PTPRC)|5970 (RELA)|6279 (S100A8)|6280 (S100A9)|7096 (TLR1)|7097 (TLR2)|7100 (TLR5)|7128 (TNFAIP3)|7462 (LAT2)|7867 (MAPKAPK3)|9261 (MAPKAPK2)|10163 (…
		M	GO|GO.CC	GO:0044433	cytoplasmic vesicle part	9.32431e-18	1.0626e-12	68	154 (ADRB2)|598 (BCL2L1)|718 (C3)|719 (C3AR1)|728 (C5AR1)|929 (CD14)|963 (CD53)|1471 (CST3)|1509 (CTSD)|1520 (CTSS)|1522 (CTSZ)|2162 (F13A1)|2207 (FCER1G)|2212 (FCGR2A)|2215 (FCGR3B)|2268 (FGR)|2357 (FPR1)|2683 (B4GALT1)|2799 (GNS)|2896 (GRN)|3101 (HK3)|3689 (ITGB2)|3958 (LGALS3)|4057 (LTF)|4353 (MPO)|4481 (MSR1)|4615 (MYD88)|4689 (NCF4)|4860 (PNP)|5045 (FURIN)|5054 (SERPINE1)|5199 (CFP)|5580 (PR…
		M	GO|GO.BP	GO:0048583	regulation of response to stimulus	9.85295e-18	1.12284e-12	127	60 (ACTB)|154 (ADRB2)|215 (ABCD1)|598 (BCL2L1)|602 (BCL3)|637 (BID)|713 (C1QB)|714 (C1QC)|718 (C3)|719 (C3AR1)|728 (C5AR1)|834 (CASP1)|923 (CD6)|929 (CD14)|1050 (CEBPA)|1230 (CCR1)|1435 (CSF1)|1445 (CSK)|1520 (CTSS)|1796 (DOK1)|2099 (ESR1)|2207 (FCER1G)|2212 (FCGR2A)|2242 (FES)|2268 (FGR)|2357 (FPR1)|2896 (GRN)|3059 (HCLS1)|3077 (HFE)|3162 (HMOX1)|3383 (ICAM1)|3459 (IFNGR1)|3566 (IL4R)|3570 (IL6R…
		M	GO|GO.BP	GO:0006810	transport	1.10757e-17	1.26218e-12	142	60 (ACTB)|154 (ADRB2)|215 (ABCD1)|598 (BCL2L1)|602 (BCL3)|637 (BID)|718 (C3)|719 (C3AR1)|728 (C5AR1)|834 (CASP1)|923 (CD6)|929 (CD14)|963 (CD53)|1051 (CEBPB)|1230 (CCR1)|1445 (CSK)|1471 (CST3)|1509 (CTSD)|1520 (CTSS)|1522 (CTSZ)|2162 (F13A1)|2207 (FCER1G)|2212 (FCGR2A)|2215 (FCGR3B)|2242 (FES)|2268 (FGR)|2357 (FPR1)|2683 (B4GALT1)|2799 (GNS)|2896 (GRN)|3059 (HCLS1)|3077 (HFE)|3099 (HK2)|3101 (HK3…
		M	GO|GO.BP	GO:0050865	regulation of cell activation	1.53553e-17	1.74989e-12	42	923 (CD6)|1050 (CEBPA)|1051 (CEBPB)|1445 (CSK)|2207 (FCER1G)|2242 (FES)|2268 (FGR)|3077 (HFE)|3162 (HMOX1)|3566 (IL4R)|3570 (IL6R)|3635 (INPP5D)|3659 (IRF1)|3689 (ITGB2)|3956 (LGALS1)|3958 (LGALS3)|4067 (LYN)|4860 (PNP)|5341 (PLEK)|5580 (PRKCD)|5788 (PTPRC)|5880 (RAC2)|6347 (CCL2)|6665 (SOX15)|6693 (SPN)|6778 (STAT6)|7040 (TGFB1)|7128 (TNFAIP3)|8673 (VAMP8)|8808 (IL1RL2)|8832 (CD84)|9308 (CD83)|1…
		M	GO|GO.BP	GO:0031349	positive regulation of defense response	2.15931e-17	2.46075e-12	36	718 (C3)|923 (CD6)|929 (CD14)|1050 (CEBPA)|1520 (CTSS)|2099 (ESR1)|2207 (FCER1G)|3077 (HFE)|3659 (IRF1)|3689 (ITGB2)|4057 (LTF)|4067 (LYN)|4615 (MYD88)|5054 (SERPINE1)|5580 (PRKCD)|5970 (RELA)|6279 (S100A8)|6280 (S100A9)|7052 (TGM2)|7096 (TLR1)|7097 (TLR2)|7100 (TLR5)|7128 (TNFAIP3)|7132 (TNFRSF1A)|7867 (MAPKAPK3)|8673 (VAMP8)|8792 (TNFRSF11A)|9261 (MAPKAPK2)|10695 (CNPY3)|30835 (CD209)|63906 (GP…
		M	GO|GO.BP	GO:0051234	establishment of localization	3.11651e-17	3.55158e-12	143	60 (ACTB)|154 (ADRB2)|215 (ABCD1)|598 (BCL2L1)|602 (BCL3)|637 (BID)|718 (C3)|719 (C3AR1)|728 (C5AR1)|834 (CASP1)|923 (CD6)|929 (CD14)|963 (CD53)|1051 (CEBPB)|1230 (CCR1)|1445 (CSK)|1471 (CST3)|1509 (CTSD)|1520 (CTSS)|1522 (CTSZ)|2162 (F13A1)|2207 (FCER1G)|2212 (FCGR2A)|2215 (FCGR3B)|2242 (FES)|2268 (FGR)|2357 (FPR1)|2683 (B4GALT1)|2799 (GNS)|2896 (GRN)|3059 (HCLS1)|3077 (HFE)|3099 (HK2)|3101 (HK3…
		M	GO|GO.BP	GO:0051179	localization	3.8793e-17	4.42085e-12	166	60 (ACTB)|140 (ADORA3)|154 (ADRB2)|215 (ABCD1)|598 (BCL2L1)|602 (BCL3)|637 (BID)|694 (BTG1)|718 (C3)|719 (C3AR1)|728 (C5AR1)|752 (FMNL1)|834 (CASP1)|923 (CD6)|929 (CD14)|963 (CD53)|1051 (CEBPB)|1230 (CCR1)|1435 (CSF1)|1445 (CSK)|1471 (CST3)|1509 (CTSD)|1520 (CTSS)|1522 (CTSZ)|2099 (ESR1)|2162 (F13A1)|2207 (FCER1G)|2212 (FCGR2A)|2215 (FCGR3B)|2242 (FES)|2268 (FGR)|2357 (FPR1)|2683 (B4GALT1)|2799 (…
		M	GO|GO.BP	GO:0048534	hematopoietic or lymphoid organ development	5.56517e-17	6.34207e-12	50	602 (BCL3)|714 (C1QC)|1050 (CEBPA)|1051 (CEBPB)|1230 (CCR1)|1435 (CSF1)|1777 (DNASE2)|2207 (FCER1G)|2242 (FES)|2872 (MKNK2)|3059 (HCLS1)|3566 (IL4R)|3635 (INPP5D)|3659 (IRF1)|3955 (LFNG)|3956 (LGALS1)|3958 (LGALS3)|4057 (LTF)|4067 (LYN)|4791 (NFKB2)|4860 (PNP)|5341 (PLEK)|5452 (POU2F2)|5788 (PTPRC)|6693 (SPN)|6778 (STAT6)|7040 (TGFB1)|7046 (TGFBR1)|7097 (TLR2)|7305 (TYROBP)|7480 (WNT10B)|7538 (ZF…
		M	GO|GO.CC	GO:0099503	secretory vesicle	1.07511e-16	1.22519e-11	53	598 (BCL2L1)|718 (C3)|719 (C3AR1)|728 (C5AR1)|929 (CD14)|963 (CD53)|1471 (CST3)|1509 (CTSD)|1520 (CTSS)|1522 (CTSZ)|2162 (F13A1)|2207 (FCER1G)|2212 (FCGR2A)|2215 (FCGR3B)|2268 (FGR)|2357 (FPR1)|2683 (B4GALT1)|2799 (GNS)|2896 (GRN)|3073 (HEXA)|3101 (HK3)|3689 (ITGB2)|3958 (LGALS3)|4057 (LTF)|4353 (MPO)|4688 (NCF2)|4860 (PNP)|5054 (SERPINE1)|5199 (CFP)|5580 (PRKCD)|5788 (PTPRC)|6279 (S100A8)|6280 (…
		M	GO|GO.CC	GO:0031410	cytoplasmic vesicle	1.22111e-16	1.39158e-11	85	154 (ADRB2)|598 (BCL2L1)|718 (C3)|719 (C3AR1)|728 (C5AR1)|752 (FMNL1)|929 (CD14)|963 (CD53)|1471 (CST3)|1509 (CTSD)|1520 (CTSS)|1522 (CTSZ)|2162 (F13A1)|2207 (FCER1G)|2212 (FCGR2A)|2215 (FCGR3B)|2242 (FES)|2268 (FGR)|2357 (FPR1)|2683 (B4GALT1)|2799 (GNS)|2896 (GRN)|3073 (HEXA)|3077 (HFE)|3101 (HK3)|3689 (ITGB2)|3693 (ITGB5)|3958 (LGALS3)|4057 (LTF)|4353 (MPO)|4481 (MSR1)|4615 (MYD88)|4688 (NCF2)|…
		M	GO|GO.BP	GO:0002520	immune system development	1.23256e-16	1.40462e-11	51	602 (BCL3)|714 (C1QC)|1050 (CEBPA)|1051 (CEBPB)|1230 (CCR1)|1435 (CSF1)|1777 (DNASE2)|2207 (FCER1G)|2242 (FES)|2872 (MKNK2)|3059 (HCLS1)|3566 (IL4R)|3635 (INPP5D)|3659 (IRF1)|3955 (LFNG)|3956 (LGALS1)|3958 (LGALS3)|4057 (LTF)|4067 (LYN)|4791 (NFKB2)|4860 (PNP)|5341 (PLEK)|5452 (POU2F2)|5788 (PTPRC)|6693 (SPN)|6778 (STAT6)|7040 (TGFB1)|7046 (TGFBR1)|7097 (TLR2)|7128 (TNFAIP3)|7305 (TYROBP)|7480 (W…
		M	GO|GO.CC	GO:0097708	intracellular vesicle	1.32193e-16	1.50647e-11	85	154 (ADRB2)|598 (BCL2L1)|718 (C3)|719 (C3AR1)|728 (C5AR1)|752 (FMNL1)|929 (CD14)|963 (CD53)|1471 (CST3)|1509 (CTSD)|1520 (CTSS)|1522 (CTSZ)|2162 (F13A1)|2207 (FCER1G)|2212 (FCGR2A)|2215 (FCGR3B)|2242 (FES)|2268 (FGR)|2357 (FPR1)|2683 (B4GALT1)|2799 (GNS)|2896 (GRN)|3073 (HEXA)|3077 (HFE)|3101 (HK3)|3689 (ITGB2)|3693 (ITGB5)|3958 (LGALS3)|4057 (LTF)|4353 (MPO)|4481 (MSR1)|4615 (MYD88)|4688 (NCF2)|…
		M	GO|GO.BP	GO:0007165	signal transduction	1.49912e-16	1.70839e-11	156	60 (ACTB)|140 (ADORA3)|154 (ADRB2)|598 (BCL2L1)|602 (BCL3)|637 (BID)|718 (C3)|719 (C3AR1)|728 (C5AR1)|834 (CASP1)|923 (CD6)|929 (CD14)|963 (CD53)|1040 (CDS1)|1050 (CEBPA)|1051 (CEBPB)|1230 (CCR1)|1435 (CSF1)|1439 (CSF2RB)|1445 (CSK)|1520 (CTSS)|1796 (DOK1)|1820 (ARID3A)|2099 (ESR1)|2162 (F13A1)|2207 (FCER1G)|2212 (FCGR2A)|2268 (FGR)|2357 (FPR1)|2872 (MKNK2)|2896 (GRN)|3059 (HCLS1)|3077 (HFE)|3162…
		M	GO|GO.BP	GO:0030097	hemopoiesis	1.78025e-16	2.02877e-11	48	602 (BCL3)|714 (C1QC)|1050 (CEBPA)|1051 (CEBPB)|1230 (CCR1)|1435 (CSF1)|1777 (DNASE2)|2207 (FCER1G)|2242 (FES)|2872 (MKNK2)|3059 (HCLS1)|3566 (IL4R)|3635 (INPP5D)|3659 (IRF1)|3955 (LFNG)|3956 (LGALS1)|3958 (LGALS3)|4057 (LTF)|4067 (LYN)|4860 (PNP)|5341 (PLEK)|5452 (POU2F2)|5788 (PTPRC)|6693 (SPN)|6778 (STAT6)|7040 (TGFB1)|7097 (TLR2)|7305 (TYROBP)|7480 (WNT10B)|7538 (ZFP36)|8792 (TNFRSF11A)|8808 …
		M	GO|GO.BP	GO:0007166	cell surface receptor signaling pathway	3.67325e-16	4.18603e-11	99	60 (ACTB)|140 (ADORA3)|154 (ADRB2)|598 (BCL2L1)|637 (BID)|718 (C3)|719 (C3AR1)|728 (C5AR1)|834 (CASP1)|923 (CD6)|929 (CD14)|963 (CD53)|1050 (CEBPA)|1230 (CCR1)|1435 (CSF1)|1439 (CSF2RB)|1445 (CSK)|1796 (DOK1)|2099 (ESR1)|2162 (F13A1)|2207 (FCER1G)|2212 (FCGR2A)|2268 (FGR)|2357 (FPR1)|2872 (MKNK2)|3077 (HFE)|3162 (HMOX1)|3383 (ICAM1)|3459 (IFNGR1)|3566 (IL4R)|3570 (IL6R)|3635 (INPP5D)|3659 (IRF1)|…
		M	GO|GO.BP	GO:0002224	toll-like receptor signaling pathway	3.69557e-16	4.21147e-11	21	929 (CD14)|1520 (CTSS)|2099 (ESR1)|3659 (IRF1)|3689 (ITGB2)|4057 (LTF)|4067 (LYN)|4615 (MYD88)|6279 (S100A8)|6280 (S100A9)|7096 (TLR1)|7097 (TLR2)|7100 (TLR5)|7128 (TNFAIP3)|7867 (MAPKAPK3)|9261 (MAPKAPK2)|10695 (CNPY3)|79155 (TNIP2)|81622 (UNC93B1)|118788 (PIK3AP1)|148022 (TICAM1)
		M	GO|GO.BP	GO:0032101	regulation of response to external stimulus	4.7781e-16	5.44513e-11	48	215 (ABCD1)|713 (C1QB)|714 (C1QC)|718 (C3)|719 (C3AR1)|728 (C5AR1)|923 (CD6)|1050 (CEBPA)|1230 (CCR1)|1435 (CSF1)|2099 (ESR1)|2207 (FCER1G)|3570 (IL6R)|3689 (ITGB2)|4057 (LTF)|4067 (LYN)|4615 (MYD88)|4836 (NMT1)|5054 (SERPINE1)|5199 (CFP)|5341 (PLEK)|5580 (PRKCD)|5788 (PTPRC)|5880 (RAC2)|5970 (RELA)|6279 (S100A8)|6280 (S100A9)|6347 (CCL2)|6665 (SOX15)|6696 (SPP1)|7040 (TGFB1)|7052 (TGM2)|7097 (TL…
		M	GO|GO.BP	GO:0050727	regulation of inflammatory response	8.6276e-16	9.83202e-11	34	215 (ABCD1)|713 (C1QB)|714 (C1QC)|718 (C3)|719 (C3AR1)|728 (C5AR1)|923 (CD6)|1050 (CEBPA)|2099 (ESR1)|2207 (FCER1G)|3689 (ITGB2)|4067 (LYN)|4615 (MYD88)|5054 (SERPINE1)|5199 (CFP)|5580 (PRKCD)|5788 (PTPRC)|5970 (RELA)|6279 (S100A8)|6280 (S100A9)|7052 (TGM2)|7097 (TLR2)|7128 (TNFAIP3)|7132 (TNFRSF1A)|7133 (TNFRSF1B)|8673 (VAMP8)|8792 (TNFRSF11A)|8808 (IL1RL2)|9021 (SOCS3)|22904 (SBNO2)|63940 (GPSM…
		M	GO|GO.BP	GO:0002758	innate immune response-activating signal transduction	9.53827e-16	1.08698e-10	26	929 (CD14)|1520 (CTSS)|2099 (ESR1)|2207 (FCER1G)|3659 (IRF1)|3689 (ITGB2)|4057 (LTF)|4067 (LYN)|4615 (MYD88)|5580 (PRKCD)|5970 (RELA)|6279 (S100A8)|6280 (S100A9)|7096 (TLR1)|7097 (TLR2)|7100 (TLR5)|7128 (TNFAIP3)|7867 (MAPKAPK3)|9261 (MAPKAPK2)|10695 (CNPY3)|30835 (CD209)|63906 (GPATCH3)|79155 (TNIP2)|81622 (UNC93B1)|118788 (PIK3AP1)|148022 (TICAM1)
		M	GO|GO.BP	GO:0007154	cell communication	1.11551e-15	1.27123e-10	162	60 (ACTB)|140 (ADORA3)|154 (ADRB2)|598 (BCL2L1)|602 (BCL3)|637 (BID)|718 (C3)|719 (C3AR1)|728 (C5AR1)|834 (CASP1)|923 (CD6)|929 (CD14)|963 (CD53)|1040 (CDS1)|1050 (CEBPA)|1051 (CEBPB)|1230 (CCR1)|1435 (CSF1)|1439 (CSF2RB)|1445 (CSK)|1520 (CTSS)|1796 (DOK1)|1820 (ARID3A)|2099 (ESR1)|2162 (F13A1)|2207 (FCER1G)|2212 (FCGR2A)|2268 (FGR)|2357 (FPR1)|2872 (MKNK2)|2896 (GRN)|3059 (HCLS1)|3077 (HFE)|3162…
		M	GO|GO.BP	GO:0048518	positive regulation of biological process	1.48948e-15	1.69741e-10	154	60 (ACTB)|154 (ADRB2)|215 (ABCD1)|463 (ZFHX3)|598 (BCL2L1)|602 (BCL3)|637 (BID)|694 (BTG1)|713 (C1QB)|714 (C1QC)|718 (C3)|719 (C3AR1)|728 (C5AR1)|834 (CASP1)|923 (CD6)|929 (CD14)|963 (CD53)|1050 (CEBPA)|1051 (CEBPB)|1230 (CCR1)|1435 (CSF1)|1445 (CSK)|1520 (CTSS)|1522 (CTSZ)|1796 (DOK1)|1820 (ARID3A)|2000 (ELF4)|2099 (ESR1)|2207 (FCER1G)|2212 (FCGR2A)|2242 (FES)|2268 (FGR)|2357 (FPR1)|2683 (B4GALT…
		M	GO|GO.BP	GO:0002694	regulation of leukocyte activation	1.89249e-15	2.15669e-10	38	923 (CD6)|1050 (CEBPA)|1051 (CEBPB)|1445 (CSK)|2207 (FCER1G)|2242 (FES)|2268 (FGR)|3077 (HFE)|3162 (HMOX1)|3566 (IL4R)|3570 (IL6R)|3635 (INPP5D)|3659 (IRF1)|3689 (ITGB2)|3956 (LGALS1)|3958 (LGALS3)|4067 (LYN)|4860 (PNP)|5788 (PTPRC)|5880 (RAC2)|6347 (CCL2)|6693 (SPN)|6778 (STAT6)|7040 (TGFB1)|7128 (TNFAIP3)|8673 (VAMP8)|8808 (IL1RL2)|8832 (CD84)|9308 (CD83)|10148 (EBI3)|23308 (ICOSLG)|30835 (CD20…
		M	GO|GO.BP	GO:0002221	pattern recognition receptor signaling pathway	2.08339e-15	2.37423e-10	23	929 (CD14)|1520 (CTSS)|2099 (ESR1)|3659 (IRF1)|3689 (ITGB2)|4057 (LTF)|4067 (LYN)|4615 (MYD88)|5970 (RELA)|6279 (S100A8)|6280 (S100A9)|7096 (TLR1)|7097 (TLR2)|7100 (TLR5)|7128 (TNFAIP3)|7867 (MAPKAPK3)|9261 (MAPKAPK2)|10695 (CNPY3)|63906 (GPATCH3)|79155 (TNIP2)|81622 (UNC93B1)|118788 (PIK3AP1)|148022 (TICAM1)
		M	GO|GO.BP	GO:0046649	lymphocyte activation	2.92962e-15	3.33859e-10	43	602 (BCL3)|923 (CD6)|1051 (CEBPB)|1445 (CSK)|2000 (ELF4)|2207 (FCER1G)|3077 (HFE)|3383 (ICAM1)|3566 (IL4R)|3570 (IL6R)|3635 (INPP5D)|3659 (IRF1)|3689 (ITGB2)|3955 (LFNG)|3956 (LGALS1)|3958 (LGALS3)|4067 (LYN)|4860 (PNP)|5452 (POU2F2)|5580 (PRKCD)|5788 (PTPRC)|5880 (RAC2)|6347 (CCL2)|6693 (SPN)|6778 (STAT6)|7040 (TGFB1)|7128 (TNFAIP3)|7462 (LAT2)|8808 (IL1RL2)|8935 (SKAP2)|9308 (CD83)|10148 (EBI3)…
		M	GO|GO.BP	GO:0045088	regulation of innate immune response	3.37578e-15	3.84704e-10	31	929 (CD14)|1520 (CTSS)|2099 (ESR1)|2207 (FCER1G)|2268 (FGR)|3077 (HFE)|3459 (IFNGR1)|3659 (IRF1)|3689 (ITGB2)|4057 (LTF)|4067 (LYN)|4615 (MYD88)|5580 (PRKCD)|5970 (RELA)|6279 (S100A8)|6280 (S100A9)|7096 (TLR1)|7097 (TLR2)|7100 (TLR5)|7128 (TNFAIP3)|7867 (MAPKAPK3)|9021 (SOCS3)|9261 (MAPKAPK2)|10695 (CNPY3)|30835 (CD209)|60343 (FAM3A)|63906 (GPATCH3)|79155 (TNIP2)|81622 (UNC93B1)|118788 (PIK3AP1)|…
		M	GO|GO.BP	GO:0023052	signaling	3.55621e-15	4.05266e-10	160	60 (ACTB)|140 (ADORA3)|154 (ADRB2)|598 (BCL2L1)|602 (BCL3)|637 (BID)|718 (C3)|719 (C3AR1)|728 (C5AR1)|834 (CASP1)|923 (CD6)|929 (CD14)|963 (CD53)|1040 (CDS1)|1050 (CEBPA)|1051 (CEBPB)|1230 (CCR1)|1435 (CSF1)|1439 (CSF2RB)|1445 (CSK)|1520 (CTSS)|1796 (DOK1)|1820 (ARID3A)|2099 (ESR1)|2162 (F13A1)|2207 (FCER1G)|2212 (FCGR2A)|2268 (FGR)|2357 (FPR1)|2872 (MKNK2)|2896 (GRN)|3059 (HCLS1)|3077 (HFE)|3162…
		M	GO|GO.BP	GO:0002218	activation of innate immune response	6.39774e-15	7.29087e-10	26	929 (CD14)|1520 (CTSS)|2099 (ESR1)|2207 (FCER1G)|3659 (IRF1)|3689 (ITGB2)|4057 (LTF)|4067 (LYN)|4615 (MYD88)|5580 (PRKCD)|5970 (RELA)|6279 (S100A8)|6280 (S100A9)|7096 (TLR1)|7097 (TLR2)|7100 (TLR5)|7128 (TNFAIP3)|7867 (MAPKAPK3)|9261 (MAPKAPK2)|10695 (CNPY3)|30835 (CD209)|63906 (GPATCH3)|79155 (TNIP2)|81622 (UNC93B1)|118788 (PIK3AP1)|148022 (TICAM1)
		M	GO|GO.BP	GO:0051239	regulation of multicellular organismal process	1.39591e-14	1.59078e-09	98	140 (ADORA3)|154 (ADRB2)|215 (ABCD1)|463 (ZFHX3)|602 (BCL3)|694 (BTG1)|714 (C1QC)|718 (C3)|719 (C3AR1)|728 (C5AR1)|834 (CASP1)|923 (CD6)|929 (CD14)|1050 (CEBPA)|1051 (CEBPB)|1230 (CCR1)|1435 (CSF1)|1445 (CSK)|1471 (CST3)|1522 (CTSZ)|2099 (ESR1)|2207 (FCER1G)|2242 (FES)|2268 (FGR)|3059 (HCLS1)|3077 (HFE)|3099 (HK2)|3162 (HMOX1)|3383 (ICAM1)|3566 (IL4R)|3570 (IL6R)|3635 (INPP5D)|3659 (IRF1)|3689 (I…
		M	GO|GO.BP	GO:0080134	regulation of response to stress	1.41483e-14	1.61234e-09	62	215 (ABCD1)|598 (BCL2L1)|637 (BID)|713 (C1QB)|714 (C1QC)|718 (C3)|719 (C3AR1)|728 (C5AR1)|923 (CD6)|929 (CD14)|1050 (CEBPA)|1520 (CTSS)|2099 (ESR1)|2207 (FCER1G)|2268 (FGR)|3077 (HFE)|3459 (IFNGR1)|3659 (IRF1)|3689 (ITGB2)|4057 (LTF)|4067 (LYN)|4615 (MYD88)|5054 (SERPINE1)|5199 (CFP)|5341 (PLEK)|5580 (PRKCD)|5788 (PTPRC)|5970 (RELA)|6279 (S100A8)|6280 (S100A9)|6665 (SOX15)|6696 (SPP1)|7052 (TGM2)…
		M	GO|GO.BP	GO:0002521	leukocyte differentiation	1.91684e-14	2.18443e-09	35	602 (BCL3)|714 (C1QC)|1050 (CEBPA)|1051 (CEBPB)|1230 (CCR1)|1435 (CSF1)|2207 (FCER1G)|3059 (HCLS1)|3566 (IL4R)|3635 (INPP5D)|3659 (IRF1)|3955 (LFNG)|3956 (LGALS1)|4057 (LTF)|4067 (LYN)|4860 (PNP)|5452 (POU2F2)|5788 (PTPRC)|6693 (SPN)|6778 (STAT6)|7040 (TGFB1)|7097 (TLR2)|7305 (TYROBP)|8792 (TNFRSF11A)|8808 (IL1RL2)|9308 (CD83)|10320 (IKZF1)|22904 (SBNO2)|23228 (PLCL2)|54209 (TREM2)|54440 (SASH3)|…
		M	GO|GO.BP	GO:0002237	response to molecule of bacterial origin	1.96309e-14	2.23713e-09	29	728 (C5AR1)|834 (CASP1)|923 (CD6)|929 (CD14)|1051 (CEBPB)|1439 (CSF2RB)|3383 (ICAM1)|4057 (LTF)|4067 (LYN)|4353 (MPO)|4791 (NFKB2)|5054 (SERPINE1)|5970 (RELA)|6279 (S100A8)|6347 (CCL2)|7040 (TGFB1)|7096 (TLR1)|7097 (TLR2)|7128 (TNFAIP3)|7133 (TNFRSF1B)|7538 (ZFP36)|7867 (MAPKAPK3)|8792 (TNFRSF11A)|9261 (MAPKAPK2)|22904 (SBNO2)|54209 (TREM2)|79155 (TNIP2)|114548 (NLRP3)|148022 (TICAM1)
		M	GO|GO.BP	GO:0009967	positive regulation of signal transduction	3.49887e-14	3.98731e-09	65	154 (ADRB2)|598 (BCL2L1)|637 (BID)|718 (C3)|728 (C5AR1)|834 (CASP1)|929 (CD14)|1230 (CCR1)|1435 (CSF1)|1445 (CSK)|1796 (DOK1)|2099 (ESR1)|2268 (FGR)|2357 (FPR1)|3059 (HCLS1)|3077 (HFE)|3162 (HMOX1)|3383 (ICAM1)|3570 (IL6R)|3927 (LASP1)|3955 (LFNG)|3956 (LGALS1)|4057 (LTF)|4067 (LYN)|4615 (MYD88)|4836 (NMT1)|5580 (PRKCD)|5606 (MAP2K3)|5788 (PTPRC)|5970 (RELA)|6279 (S100A8)|6280 (S100A9)|6299 (SALL…
		M	GO|GO.BP	GO:0032496	response to lipopolysaccharide	5.08787e-14	5.79813e-09	28	728 (C5AR1)|834 (CASP1)|923 (CD6)|929 (CD14)|1051 (CEBPB)|1439 (CSF2RB)|3383 (ICAM1)|4057 (LTF)|4067 (LYN)|4353 (MPO)|4791 (NFKB2)|5054 (SERPINE1)|5970 (RELA)|6279 (S100A8)|6347 (CCL2)|7040 (TGFB1)|7097 (TLR2)|7128 (TNFAIP3)|7133 (TNFRSF1B)|7538 (ZFP36)|7867 (MAPKAPK3)|8792 (TNFRSF11A)|9261 (MAPKAPK2)|22904 (SBNO2)|54209 (TREM2)|79155 (TNIP2)|114548 (NLRP3)|148022 (TICAM1)
		M	GO|GO.BP	GO:0007159	leukocyte cell-cell adhesion	6.40553e-14	7.29974e-09	28	923 (CD6)|1051 (CEBPB)|1445 (CSK)|3077 (HFE)|3383 (ICAM1)|3566 (IL4R)|3570 (IL6R)|3659 (IRF1)|3689 (ITGB2)|3956 (LGALS1)|3958 (LGALS3)|4067 (LYN)|4860 (PNP)|5788 (PTPRC)|5880 (RAC2)|6279 (S100A8)|6280 (S100A9)|6347 (CCL2)|6693 (SPN)|7040 (TGFB1)|8808 (IL1RL2)|9308 (CD83)|10148 (EBI3)|23308 (ICOSLG)|30835 (CD209)|54440 (SASH3)|83706 (FERMT3)|114548 (NLRP3)
		M	GO|GO.BP	GO:0051716	cellular response to stimulus	6.56089e-14	7.4768e-09	172	60 (ACTB)|140 (ADORA3)|154 (ADRB2)|215 (ABCD1)|241 (ALOX5AP)|598 (BCL2L1)|602 (BCL3)|637 (BID)|718 (C3)|719 (C3AR1)|728 (C5AR1)|834 (CASP1)|923 (CD6)|929 (CD14)|963 (CD53)|1040 (CDS1)|1050 (CEBPA)|1051 (CEBPB)|1230 (CCR1)|1435 (CSF1)|1439 (CSF2RB)|1445 (CSK)|1520 (CTSS)|1796 (DOK1)|1820 (ARID3A)|2099 (ESR1)|2162 (F13A1)|2207 (FCER1G)|2212 (FCGR2A)|2268 (FGR)|2357 (FPR1)|2872 (MKNK2)|2896 (GRN)|30…
		M	GO|GO.BP	GO:0045089	positive regulation of innate immune response	1.1255e-13	1.28262e-08	27	929 (CD14)|1520 (CTSS)|2099 (ESR1)|2207 (FCER1G)|3077 (HFE)|3659 (IRF1)|3689 (ITGB2)|4057 (LTF)|4067 (LYN)|4615 (MYD88)|5580 (PRKCD)|5970 (RELA)|6279 (S100A8)|6280 (S100A9)|7096 (TLR1)|7097 (TLR2)|7100 (TLR5)|7128 (TNFAIP3)|7867 (MAPKAPK3)|9261 (MAPKAPK2)|10695 (CNPY3)|30835 (CD209)|63906 (GPATCH3)|79155 (TNIP2)|81622 (UNC93B1)|118788 (PIK3AP1)|148022 (TICAM1)
		M	GO|GO.CC	GO:0005737	cytoplasm	1.99384e-13	2.27218e-08	229	60 (ACTB)|154 (ADRB2)|215 (ABCD1)|241 (ALOX5AP)|463 (ZFHX3)|598 (BCL2L1)|602 (BCL3)|637 (BID)|694 (BTG1)|718 (C3)|719 (C3AR1)|728 (C5AR1)|752 (FMNL1)|834 (CASP1)|929 (CD14)|963 (CD53)|1040 (CDS1)|1051 (CEBPB)|1230 (CCR1)|1293 (COL6A3)|1435 (CSF1)|1445 (CSK)|1471 (CST3)|1509 (CTSD)|1520 (CTSS)|1522 (CTSZ)|1777 (DNASE2)|1796 (DOK1)|1820 (ARID3A)|2099 (ESR1)|2162 (F13A1)|2207 (FCER1G)|2212 (FCGR2A)|…
		M	GO|GO.CC	GO:0012505	endomembrane system	2.03435e-13	2.31834e-08	120	154 (ADRB2)|215 (ABCD1)|241 (ALOX5AP)|598 (BCL2L1)|718 (C3)|719 (C3AR1)|728 (C5AR1)|929 (CD14)|963 (CD53)|1040 (CDS1)|1293 (COL6A3)|1435 (CSF1)|1471 (CST3)|1509 (CTSD)|1520 (CTSS)|1522 (CTSZ)|2099 (ESR1)|2162 (F13A1)|2207 (FCER1G)|2212 (FCGR2A)|2215 (FCGR3B)|2242 (FES)|2268 (FGR)|2357 (FPR1)|2683 (B4GALT1)|2799 (GNS)|2896 (GRN)|3073 (HEXA)|3077 (HFE)|3099 (HK2)|3101 (HK3)|3162 (HMOX1)|3689 (ITGB2…
		M	GO|GO.CC	GO:0098805	whole membrane	2.36897e-13	2.69967e-08	64	154 (ADRB2)|215 (ABCD1)|598 (BCL2L1)|637 (BID)|719 (C3AR1)|728 (C5AR1)|929 (CD14)|963 (CD53)|1445 (CSK)|1509 (CTSD)|1820 (ARID3A)|2207 (FCER1G)|2212 (FCGR2A)|2215 (FCGR3B)|2357 (FPR1)|2683 (B4GALT1)|3099 (HK2)|3162 (HMOX1)|3383 (ICAM1)|3635 (INPP5D)|3689 (ITGB2)|3937 (LCP2)|3945 (LDHB)|3958 (LGALS3)|4067 (LYN)|4481 (MSR1)|4615 (MYD88)|4689 (NCF4)|5045 (FURIN)|5788 (PTPRC)|5880 (RAC2)|6778 (STAT6)…
		M	GO|GO.BP	GO:0098542	defense response to other organism	2.68197e-13	3.05637e-08	35	602 (BCL3)|728 (C5AR1)|1051 (CEBPB)|2207 (FCER1G)|2268 (FGR)|3566 (IL4R)|3570 (IL6R)|3659 (IRF1)|4057 (LTF)|4353 (MPO)|4615 (MYD88)|4939 (OAS2)|5054 (SERPINE1)|5199 (CFP)|5580 (PRKCD)|5788 (PTPRC)|5970 (RELA)|6039 (RNASE6)|6279 (S100A8)|6280 (S100A9)|6693 (SPN)|7040 (TGFB1)|7097 (TLR2)|7100 (TLR5)|7128 (TNFAIP3)|7132 (TNFRSF1A)|9020 (MAP3K14)|23166 (STAB1)|23406 (COTL1)|60343 (FAM3A)|63906 (GPATC…
		M	GO|GO.BP	GO:0010647	positive regulation of cell communication	2.88924e-13	3.29258e-08	67	154 (ADRB2)|598 (BCL2L1)|637 (BID)|718 (C3)|728 (C5AR1)|834 (CASP1)|929 (CD14)|1230 (CCR1)|1435 (CSF1)|1445 (CSK)|1796 (DOK1)|2099 (ESR1)|2268 (FGR)|2357 (FPR1)|3059 (HCLS1)|3077 (HFE)|3162 (HMOX1)|3383 (ICAM1)|3570 (IL6R)|3927 (LASP1)|3955 (LFNG)|3956 (LGALS1)|4057 (LTF)|4067 (LYN)|4615 (MYD88)|4836 (NMT1)|5580 (PRKCD)|5606 (MAP2K3)|5788 (PTPRC)|5970 (RELA)|6279 (S100A8)|6280 (S100A9)|6299 (SALL…
		M	GO|GO.BP	GO:0048522	positive regulation of cellular process	2.91121e-13	3.31762e-08	136	154 (ADRB2)|215 (ABCD1)|463 (ZFHX3)|598 (BCL2L1)|602 (BCL3)|637 (BID)|694 (BTG1)|718 (C3)|719 (C3AR1)|728 (C5AR1)|834 (CASP1)|923 (CD6)|929 (CD14)|963 (CD53)|1050 (CEBPA)|1051 (CEBPB)|1230 (CCR1)|1435 (CSF1)|1445 (CSK)|1522 (CTSZ)|1796 (DOK1)|1820 (ARID3A)|2000 (ELF4)|2099 (ESR1)|2207 (FCER1G)|2242 (FES)|2268 (FGR)|2357 (FPR1)|2683 (B4GALT1)|3059 (HCLS1)|3077 (HFE)|3099 (HK2)|3162 (HMOX1)|3383 (I…
		M	GO|GO.BP	GO:0034097	response to cytokine	3.44205e-13	3.92256e-08	51	598 (BCL2L1)|834 (CASP1)|929 (CD14)|1050 (CEBPA)|1051 (CEBPB)|1230 (CCR1)|1435 (CSF1)|1439 (CSF2RB)|1796 (DOK1)|2162 (F13A1)|2207 (FCER1G)|2357 (FPR1)|3059 (HCLS1)|3099 (HK2)|3162 (HMOX1)|3383 (ICAM1)|3459 (IFNGR1)|3566 (IL4R)|3570 (IL6R)|3635 (INPP5D)|3659 (IRF1)|3689 (ITGB2)|4615 (MYD88)|4791 (NFKB2)|4939 (OAS2)|5580 (PRKCD)|5696 (PSMB8)|5788 (PTPRC)|5970 (RELA)|6347 (CCL2)|6778 (STAT6)|7040 (T…
		M	GO|GO.BP	GO:0023056	positive regulation of signaling	3.47341e-13	3.9583e-08	67	154 (ADRB2)|598 (BCL2L1)|637 (BID)|718 (C3)|728 (C5AR1)|834 (CASP1)|929 (CD14)|1230 (CCR1)|1435 (CSF1)|1445 (CSK)|1796 (DOK1)|2099 (ESR1)|2268 (FGR)|2357 (FPR1)|3059 (HCLS1)|3077 (HFE)|3162 (HMOX1)|3383 (ICAM1)|3570 (IL6R)|3927 (LASP1)|3955 (LFNG)|3956 (LGALS1)|4057 (LTF)|4067 (LYN)|4615 (MYD88)|4836 (NMT1)|5580 (PRKCD)|5606 (MAP2K3)|5788 (PTPRC)|5970 (RELA)|6279 (S100A8)|6280 (S100A9)|6299 (SALL…
		M	GO|GO.BP	GO:0051240	positive regulation of multicellular organismal process	6.14577e-13	7.00372e-08	66	154 (ADRB2)|602 (BCL3)|694 (BTG1)|718 (C3)|719 (C3AR1)|728 (C5AR1)|834 (CASP1)|923 (CD6)|929 (CD14)|1050 (CEBPA)|1051 (CEBPB)|1230 (CCR1)|1435 (CSF1)|2207 (FCER1G)|2242 (FES)|2268 (FGR)|3059 (HCLS1)|3099 (HK2)|3162 (HMOX1)|3383 (ICAM1)|3566 (IL4R)|3570 (IL6R)|3635 (INPP5D)|3659 (IRF1)|3689 (ITGB2)|4057 (LTF)|4067 (LYN)|4615 (MYD88)|4791 (NFKB2)|4860 (PNP)|5029 (P2RY2)|5045 (FURIN)|5054 (SERPINE1)…
		M	GO|GO.BP	GO:0022610	biological adhesion	1.36818e-12	1.55918e-07	57	60 (ACTB)|463 (ZFHX3)|923 (CD6)|1051 (CEBPB)|1230 (CCR1)|1293 (COL6A3)|1435 (CSF1)|1445 (CSK)|2242 (FES)|2683 (B4GALT1)|3077 (HFE)|3383 (ICAM1)|3566 (IL4R)|3570 (IL6R)|3659 (IRF1)|3682 (ITGAE)|3689 (ITGB2)|3693 (ITGB5)|3956 (LGALS1)|3958 (LGALS3)|4057 (LTF)|4067 (LYN)|4814 (NINJ1)|4860 (PNP)|5054 (SERPINE1)|5140 (PDE3B)|5341 (PLEK)|5580 (PRKCD)|5788 (PTPRC)|5829 (PXN)|5880 (RAC2)|6279 (S100A8)|62…
		M	GO|GO.BP	GO:0050867	positive regulation of cell activation	3.28199e-12	3.74016e-07	28	923 (CD6)|1050 (CEBPA)|1445 (CSK)|2207 (FCER1G)|2268 (FGR)|3566 (IL4R)|3570 (IL6R)|3635 (INPP5D)|3689 (ITGB2)|3956 (LGALS1)|4067 (LYN)|4860 (PNP)|5341 (PLEK)|5788 (PTPRC)|6347 (CCL2)|6665 (SOX15)|6778 (STAT6)|7040 (TGFB1)|8673 (VAMP8)|8808 (IL1RL2)|9308 (CD83)|10148 (EBI3)|23308 (ICOSLG)|30835 (CD209)|54440 (SASH3)|79155 (TNIP2)|114548 (NLRP3)|148022 (TICAM1)
		M	GO|GO.BP	GO:0010033	response to organic substance	3.4182e-12	3.89538e-07	94	60 (ACTB)|154 (ADRB2)|463 (ZFHX3)|598 (BCL2L1)|694 (BTG1)|728 (C5AR1)|834 (CASP1)|923 (CD6)|929 (CD14)|1050 (CEBPA)|1051 (CEBPB)|1230 (CCR1)|1435 (CSF1)|1439 (CSF2RB)|1445 (CSK)|1520 (CTSS)|1796 (DOK1)|2099 (ESR1)|2162 (F13A1)|2207 (FCER1G)|2357 (FPR1)|3059 (HCLS1)|3077 (HFE)|3099 (HK2)|3162 (HMOX1)|3383 (ICAM1)|3459 (IFNGR1)|3566 (IL4R)|3570 (IL6R)|3635 (INPP5D)|3659 (IRF1)|3689 (ITGB2)|3693 (IT…
		M	GO|GO.BP	GO:0071216	cellular response to biotic stimulus	3.50613e-12	3.99558e-07	22	834 (CASP1)|923 (CD6)|929 (CD14)|1051 (CEBPB)|3383 (ICAM1)|4057 (LTF)|4067 (LYN)|5054 (SERPINE1)|5970 (RELA)|6347 (CCL2)|7040 (TGFB1)|7096 (TLR1)|7097 (TLR2)|7128 (TNFAIP3)|7133 (TNFRSF1B)|7538 (ZFP36)|10628 (TXNIP)|22904 (SBNO2)|54209 (TREM2)|79155 (TNIP2)|114548 (NLRP3)|148022 (TICAM1)
		M	GO|GO.BP	GO:0071219	cellular response to molecule of bacterial origin	3.51423e-12	4.00482e-07	21	834 (CASP1)|923 (CD6)|929 (CD14)|1051 (CEBPB)|3383 (ICAM1)|4057 (LTF)|4067 (LYN)|5054 (SERPINE1)|5970 (RELA)|6347 (CCL2)|7040 (TGFB1)|7096 (TLR1)|7097 (TLR2)|7128 (TNFAIP3)|7133 (TNFRSF1B)|7538 (ZFP36)|22904 (SBNO2)|54209 (TREM2)|79155 (TNIP2)|114548 (NLRP3)|148022 (TICAM1)
		M	GO|GO.BP	GO:0007155	cell adhesion	3.60774e-12	4.11138e-07	56	60 (ACTB)|463 (ZFHX3)|923 (CD6)|1051 (CEBPB)|1230 (CCR1)|1293 (COL6A3)|1435 (CSF1)|1445 (CSK)|2242 (FES)|2683 (B4GALT1)|3077 (HFE)|3383 (ICAM1)|3566 (IL4R)|3570 (IL6R)|3659 (IRF1)|3682 (ITGAE)|3689 (ITGB2)|3693 (ITGB5)|3956 (LGALS1)|3958 (LGALS3)|4067 (LYN)|4814 (NINJ1)|4860 (PNP)|5054 (SERPINE1)|5140 (PDE3B)|5341 (PLEK)|5580 (PRKCD)|5788 (PTPRC)|5829 (PXN)|5880 (RAC2)|6279 (S100A8)|6280 (S100A9)…
		M	GO|GO.BP	GO:0030155	regulation of cell adhesion	3.83607e-12	4.37158e-07	37	463 (ZFHX3)|923 (CD6)|1051 (CEBPB)|1435 (CSF1)|1445 (CSK)|2242 (FES)|3077 (HFE)|3383 (ICAM1)|3566 (IL4R)|3570 (IL6R)|3659 (IRF1)|3956 (LGALS1)|3958 (LGALS3)|4067 (LYN)|4814 (NINJ1)|4860 (PNP)|5054 (SERPINE1)|5140 (PDE3B)|5580 (PRKCD)|5788 (PTPRC)|5880 (RAC2)|6347 (CCL2)|6693 (SPN)|7040 (TGFB1)|7045 (TGFBI)|7052 (TGM2)|8808 (IL1RL2)|9308 (CD83)|9891 (NUAK1)|10148 (EBI3)|23308 (ICOSLG)|23654 (PLXNB…
		M	GO|GO.BP	GO:0048513	animal organ development	5.15095e-12	5.87002e-07	99	60 (ACTB)|154 (ADRB2)|463 (ZFHX3)|598 (BCL2L1)|602 (BCL3)|713 (C1QB)|714 (C1QC)|728 (C5AR1)|1050 (CEBPA)|1051 (CEBPB)|1230 (CCR1)|1293 (COL6A3)|1435 (CSF1)|1445 (CSK)|1522 (CTSZ)|1777 (DNASE2)|2099 (ESR1)|2207 (FCER1G)|2242 (FES)|2872 (MKNK2)|3059 (HCLS1)|3077 (HFE)|3099 (HK2)|3162 (HMOX1)|3383 (ICAM1)|3566 (IL4R)|3570 (IL6R)|3635 (INPP5D)|3659 (IRF1)|3955 (LFNG)|3956 (LGALS1)|3958 (LGALS3)|4057 …
		M	GO|GO.BP	GO:0070887	cellular response to chemical stimulus	5.24684e-12	5.9793e-07	93	60 (ACTB)|154 (ADRB2)|215 (ABCD1)|241 (ALOX5AP)|598 (BCL2L1)|719 (C3AR1)|728 (C5AR1)|834 (CASP1)|923 (CD6)|929 (CD14)|1050 (CEBPA)|1051 (CEBPB)|1230 (CCR1)|1435 (CSF1)|1439 (CSF2RB)|1445 (CSK)|1520 (CTSS)|1796 (DOK1)|2099 (ESR1)|2162 (F13A1)|2207 (FCER1G)|2357 (FPR1)|2872 (MKNK2)|3059 (HCLS1)|3077 (HFE)|3099 (HK2)|3162 (HMOX1)|3383 (ICAM1)|3459 (IFNGR1)|3566 (IL4R)|3570 (IL6R)|3635 (INPP5D)|3659 …
		M	GO|GO.BP	GO:0002886	regulation of myeloid leukocyte mediated immunity	7.48452e-12	8.52936e-07	12	718 (C3)|2207 (FCER1G)|2242 (FES)|2268 (FGR)|3162 (HMOX1)|3566 (IL4R)|3689 (ITGB2)|4067 (LYN)|5880 (RAC2)|8673 (VAMP8)|8832 (CD84)|148022 (TICAM1)
		M	GO|GO.CC	GO:0044444	cytoplasmic part	8.71942e-12	9.93665e-07	199	60 (ACTB)|154 (ADRB2)|215 (ABCD1)|241 (ALOX5AP)|598 (BCL2L1)|602 (BCL3)|637 (BID)|718 (C3)|719 (C3AR1)|728 (C5AR1)|752 (FMNL1)|834 (CASP1)|929 (CD14)|963 (CD53)|1040 (CDS1)|1293 (COL6A3)|1435 (CSF1)|1445 (CSK)|1471 (CST3)|1509 (CTSD)|1520 (CTSS)|1522 (CTSZ)|1777 (DNASE2)|1796 (DOK1)|1820 (ARID3A)|2099 (ESR1)|2162 (F13A1)|2207 (FCER1G)|2212 (FCGR2A)|2215 (FCGR3B)|2242 (FES)|2268 (FGR)|2289 (FKBP5)…
		M	GO|GO.BP	GO:0035556	intracellular signal transduction	8.93452e-12	1.01818e-06	86	154 (ADRB2)|598 (BCL2L1)|602 (BCL3)|637 (BID)|728 (C5AR1)|834 (CASP1)|929 (CD14)|1051 (CEBPB)|1230 (CCR1)|1435 (CSF1)|1439 (CSF2RB)|1445 (CSK)|1796 (DOK1)|1820 (ARID3A)|2099 (ESR1)|2268 (FGR)|2357 (FPR1)|2872 (MKNK2)|3059 (HCLS1)|3162 (HMOX1)|3383 (ICAM1)|3570 (IL6R)|3635 (INPP5D)|3937 (LCP2)|3956 (LGALS1)|4057 (LTF)|4067 (LYN)|4615 (MYD88)|4791 (NFKB2)|5140 (PDE3B)|5330 (PLCB2)|5341 (PLEK)|5580 …
		M	GO|GO.BP	GO:0009966	regulation of signal transduction	1.06117e-11	1.20931e-06	93	154 (ADRB2)|598 (BCL2L1)|602 (BCL3)|637 (BID)|718 (C3)|728 (C5AR1)|834 (CASP1)|929 (CD14)|1230 (CCR1)|1435 (CSF1)|1445 (CSK)|1796 (DOK1)|2099 (ESR1)|2268 (FGR)|2357 (FPR1)|2896 (GRN)|3059 (HCLS1)|3077 (HFE)|3162 (HMOX1)|3383 (ICAM1)|3459 (IFNGR1)|3570 (IL6R)|3635 (INPP5D)|3659 (IRF1)|3927 (LASP1)|3955 (LFNG)|3956 (LGALS1)|3958 (LGALS3)|4057 (LTF)|4067 (LYN)|4615 (MYD88)|4836 (NMT1)|5045 (FURIN)|5…
		M	GO|GO.BP	GO:0019221	cytokine-mediated signaling pathway	1.12738e-11	1.28476e-06	38	598 (BCL2L1)|834 (CASP1)|1050 (CEBPA)|1230 (CCR1)|1435 (CSF1)|1439 (CSF2RB)|1796 (DOK1)|2162 (F13A1)|2207 (FCER1G)|2357 (FPR1)|3162 (HMOX1)|3383 (ICAM1)|3459 (IFNGR1)|3566 (IL4R)|3570 (IL6R)|3635 (INPP5D)|3659 (IRF1)|3689 (ITGB2)|4615 (MYD88)|4939 (OAS2)|5580 (PRKCD)|5696 (PSMB8)|5788 (PTPRC)|5970 (RELA)|6347 (CCL2)|6778 (STAT6)|7040 (TGFB1)|7128 (TNFAIP3)|7132 (TNFRSF1A)|7133 (TNFRSF1B)|8792 (TN…
		M	GO|GO.CC	GO:0030667	secretory granule membrane	1.26228e-11	1.4385e-06	24	719 (C3AR1)|728 (C5AR1)|929 (CD14)|963 (CD53)|2207 (FCER1G)|2212 (FCGR2A)|2215 (FCGR3B)|2357 (FPR1)|2683 (B4GALT1)|3689 (ITGB2)|3958 (LGALS3)|5788 (PTPRC)|7097 (TLR2)|7133 (TNFRSF1B)|7305 (TYROBP)|8673 (VAMP8)|9145 (SYNGR1)|10312 (TCIRG1)|23218 (NBEAL2)|54918 (CMTM6)|57153 (SLC44A2)|81619 (TSPAN14)|84329 (HVCN1)|150372 (NFAM1)
		M	GO|GO.BP	GO:0071345	cellular response to cytokine stimulus	1.27786e-11	1.45625e-06	46	598 (BCL2L1)|834 (CASP1)|1050 (CEBPA)|1051 (CEBPB)|1230 (CCR1)|1435 (CSF1)|1439 (CSF2RB)|1796 (DOK1)|2162 (F13A1)|2207 (FCER1G)|2357 (FPR1)|3059 (HCLS1)|3099 (HK2)|3162 (HMOX1)|3383 (ICAM1)|3459 (IFNGR1)|3566 (IL4R)|3570 (IL6R)|3635 (INPP5D)|3659 (IRF1)|3689 (ITGB2)|4615 (MYD88)|4939 (OAS2)|5580 (PRKCD)|5696 (PSMB8)|5788 (PTPRC)|5970 (RELA)|6347 (CCL2)|6778 (STAT6)|7040 (TGFB1)|7097 (TLR2)|7128 (…
		M	GO|GO.CC	GO:0005764	lysosome	1.29935e-11	1.48073e-06	36	154 (ADRB2)|215 (ABCD1)|718 (C3)|719 (C3AR1)|1509 (CTSD)|1520 (CTSS)|1522 (CTSZ)|1777 (DNASE2)|2357 (FPR1)|2683 (B4GALT1)|2799 (GNS)|2896 (GRN)|3073 (HEXA)|4067 (LYN)|4353 (MPO)|4669 (NAGLU)|4688 (NCF2)|4689 (NCF4)|5580 (PRKCD)|6039 (RNASE6)|6948 (TCN2)|7107 (GPR137B)|7128 (TNFAIP3)|7462 (LAT2)|8673 (VAMP8)|9145 (SYNGR1)|10312 (TCIRG1)|51296 (SLC15A3)|54918 (CMTM6)|57153 (SLC44A2)|79887 (PLBD1)|8…
		M	GO|GO.CC	GO:0000323	lytic vacuole	1.3563e-11	1.54563e-06	36	154 (ADRB2)|215 (ABCD1)|718 (C3)|719 (C3AR1)|1509 (CTSD)|1520 (CTSS)|1522 (CTSZ)|1777 (DNASE2)|2357 (FPR1)|2683 (B4GALT1)|2799 (GNS)|2896 (GRN)|3073 (HEXA)|4067 (LYN)|4353 (MPO)|4669 (NAGLU)|4688 (NCF2)|4689 (NCF4)|5580 (PRKCD)|6039 (RNASE6)|6948 (TCN2)|7107 (GPR137B)|7128 (TNFAIP3)|7462 (LAT2)|8673 (VAMP8)|9145 (SYNGR1)|10312 (TCIRG1)|51296 (SLC15A3)|54918 (CMTM6)|57153 (SLC44A2)|79887 (PLBD1)|8…
		M	GO|GO.BP	GO:0051249	regulation of lymphocyte activation	1.70492e-11	1.94293e-06	30	923 (CD6)|1051 (CEBPB)|1445 (CSK)|3077 (HFE)|3566 (IL4R)|3570 (IL6R)|3635 (INPP5D)|3659 (IRF1)|3956 (LGALS1)|3958 (LGALS3)|4067 (LYN)|4860 (PNP)|5788 (PTPRC)|5880 (RAC2)|6347 (CCL2)|6693 (SPN)|6778 (STAT6)|7040 (TGFB1)|7128 (TNFAIP3)|8808 (IL1RL2)|9308 (CD83)|10148 (EBI3)|23308 (ICOSLG)|30835 (CD209)|54440 (SASH3)|55024 (BANK1)|79155 (TNIP2)|114548 (NLRP3)|148022 (TICAM1)|150372 (NFAM1)
		M	GO|GO.BP	GO:0006897	endocytosis	2.41317e-11	2.75005e-06	39	60 (ACTB)|154 (ADRB2)|598 (BCL2L1)|718 (C3)|923 (CD6)|929 (CD14)|1445 (CSK)|2207 (FCER1G)|2212 (FCGR2A)|2268 (FGR)|3077 (HFE)|3689 (ITGB2)|3958 (LGALS3)|4067 (LYN)|4481 (MSR1)|4688 (NCF2)|4689 (NCF4)|5054 (SERPINE1)|5580 (PRKCD)|5788 (PTPRC)|6347 (CCL2)|6614 (SIGLEC1)|7040 (TGFB1)|7052 (TGM2)|7097 (TLR2)|7867 (MAPKAPK3)|8527 (DGKD)|9261 (MAPKAPK2)|9332 (CD163)|10163 (WASF2)|23166 (STAB1)|29904 (E…
		M	GO|GO.BP	GO:0042110	T cell activation	2.86162e-11	3.2611e-06	29	602 (BCL3)|923 (CD6)|1051 (CEBPB)|1445 (CSK)|2000 (ELF4)|2207 (FCER1G)|3077 (HFE)|3383 (ICAM1)|3566 (IL4R)|3570 (IL6R)|3659 (IRF1)|3955 (LFNG)|3956 (LGALS1)|3958 (LGALS3)|4067 (LYN)|4860 (PNP)|5788 (PTPRC)|5880 (RAC2)|6347 (CCL2)|6693 (SPN)|6778 (STAT6)|7040 (TGFB1)|8808 (IL1RL2)|9308 (CD83)|10148 (EBI3)|23308 (ICOSLG)|30835 (CD209)|54440 (SASH3)|114548 (NLRP3)
		M	GO|GO.BP	GO:0048869	cellular developmental process	3.69614e-11	4.21212e-06	112	154 (ADRB2)|463 (ZFHX3)|598 (BCL2L1)|602 (BCL3)|694 (BTG1)|714 (C1QC)|752 (FMNL1)|963 (CD53)|1050 (CEBPA)|1051 (CEBPB)|1230 (CCR1)|1293 (COL6A3)|1435 (CSF1)|1445 (CSK)|1522 (CTSZ)|1777 (DNASE2)|1796 (DOK1)|2000 (ELF4)|2099 (ESR1)|2207 (FCER1G)|2242 (FES)|2268 (FGR)|2683 (B4GALT1)|3059 (HCLS1)|3383 (ICAM1)|3566 (IL4R)|3570 (IL6R)|3635 (INPP5D)|3659 (IRF1)|3689 (ITGB2)|3693 (ITGB5)|3955 (LFNG)|3956…
		M	GO|GO.BP	GO:0002696	positive regulation of leukocyte activation	5.1714e-11	5.89333e-06	26	923 (CD6)|1050 (CEBPA)|1445 (CSK)|2207 (FCER1G)|2268 (FGR)|3566 (IL4R)|3570 (IL6R)|3635 (INPP5D)|3689 (ITGB2)|3956 (LGALS1)|4067 (LYN)|4860 (PNP)|5788 (PTPRC)|6347 (CCL2)|6778 (STAT6)|7040 (TGFB1)|8673 (VAMP8)|8808 (IL1RL2)|9308 (CD83)|10148 (EBI3)|23308 (ICOSLG)|30835 (CD209)|54440 (SASH3)|79155 (TNIP2)|114548 (NLRP3)|148022 (TICAM1)
		M	GO|GO.CC	GO:1903561	extracellular vesicle	5.68784e-11	6.48186e-06	71	60 (ACTB)|718 (C3)|752 (FMNL1)|929 (CD14)|963 (CD53)|1293 (COL6A3)|1445 (CSK)|1471 (CST3)|1509 (CTSD)|1522 (CTSZ)|1777 (DNASE2)|2215 (FCGR3B)|2268 (FGR)|2289 (FKBP5)|2683 (B4GALT1)|2799 (GNS)|2896 (GRN)|3017 (HIST1H2BD)|3073 (HEXA)|3383 (ICAM1)|3689 (ITGB2)|3693 (ITGB5)|3945 (LDHB)|3955 (LFNG)|3956 (LGALS1)|3958 (LGALS3)|4046 (LSP1)|4057 (LTF)|4067 (LYN)|4245 (MGAT1)|4353 (MPO)|4669 (NAGLU)|4860 …
		M	GO|GO.CC	GO:0043230	extracellular organelle	5.93024e-11	6.7581e-06	71	60 (ACTB)|718 (C3)|752 (FMNL1)|929 (CD14)|963 (CD53)|1293 (COL6A3)|1445 (CSK)|1471 (CST3)|1509 (CTSD)|1522 (CTSZ)|1777 (DNASE2)|2215 (FCGR3B)|2268 (FGR)|2289 (FKBP5)|2683 (B4GALT1)|2799 (GNS)|2896 (GRN)|3017 (HIST1H2BD)|3073 (HEXA)|3383 (ICAM1)|3689 (ITGB2)|3693 (ITGB5)|3945 (LDHB)|3955 (LFNG)|3956 (LGALS1)|3958 (LGALS3)|4046 (LSP1)|4057 (LTF)|4067 (LYN)|4245 (MGAT1)|4353 (MPO)|4669 (NAGLU)|4860 …
		M	GO|GO.BP	GO:1902533	positive regulation of intracellular signal transduction	6.10664e-11	6.95913e-06	46	154 (ADRB2)|598 (BCL2L1)|637 (BID)|728 (C5AR1)|834 (CASP1)|929 (CD14)|1230 (CCR1)|1435 (CSF1)|1445 (CSK)|2099 (ESR1)|2268 (FGR)|2357 (FPR1)|3059 (HCLS1)|3162 (HMOX1)|3383 (ICAM1)|3570 (IL6R)|3956 (LGALS1)|4057 (LTF)|4067 (LYN)|4615 (MYD88)|5606 (MAP2K3)|5788 (PTPRC)|5970 (RELA)|6279 (S100A8)|6280 (S100A9)|6347 (CCL2)|7040 (TGFB1)|7046 (TGFBR1)|7052 (TGM2)|7097 (TLR2)|7132 (TNFRSF1A)|7867 (MAPKAPK…
		M	GO|GO.BP	GO:1903037	regulation of leukocyte cell-cell adhesion	7.04497e-11	8.02844e-06	23	923 (CD6)|1051 (CEBPB)|1445 (CSK)|3077 (HFE)|3383 (ICAM1)|3566 (IL4R)|3570 (IL6R)|3659 (IRF1)|3956 (LGALS1)|3958 (LGALS3)|4067 (LYN)|4860 (PNP)|5788 (PTPRC)|6347 (CCL2)|6693 (SPN)|7040 (TGFB1)|8808 (IL1RL2)|9308 (CD83)|10148 (EBI3)|23308 (ICOSLG)|30835 (CD209)|54440 (SASH3)|114548 (NLRP3)
		M	GO|GO.BP	GO:0098609	cell-cell adhesion	7.36445e-11	8.39253e-06	39	60 (ACTB)|923 (CD6)|1051 (CEBPB)|1445 (CSK)|3077 (HFE)|3383 (ICAM1)|3566 (IL4R)|3570 (IL6R)|3659 (IRF1)|3689 (ITGB2)|3693 (ITGB5)|3956 (LGALS1)|3958 (LGALS3)|4067 (LYN)|4860 (PNP)|5341 (PLEK)|5580 (PRKCD)|5788 (PTPRC)|5880 (RAC2)|6279 (S100A8)|6280 (S100A9)|6347 (CCL2)|6614 (SIGLEC1)|6693 (SPN)|7040 (TGFB1)|7094 (TLN1)|8808 (IL1RL2)|8832 (CD84)|9308 (CD83)|10148 (EBI3)|23308 (ICOSLG)|23654 (PLXNB…
		M	GO|GO.BP	GO:0051704	multi-organism process	8.18924e-11	9.33246e-06	77	598 (BCL2L1)|602 (BCL3)|694 (BTG1)|718 (C3)|728 (C5AR1)|834 (CASP1)|923 (CD6)|929 (CD14)|1050 (CEBPA)|1051 (CEBPB)|1439 (CSF2RB)|2099 (ESR1)|2207 (FCER1G)|2268 (FGR)|2289 (FKBP5)|2683 (B4GALT1)|3077 (HFE)|3383 (ICAM1)|3459 (IFNGR1)|3566 (IL4R)|3570 (IL6R)|3659 (IRF1)|3693 (ITGB5)|3956 (LGALS1)|4057 (LTF)|4067 (LYN)|4353 (MPO)|4615 (MYD88)|4791 (NFKB2)|4939 (OAS2)|5045 (FURIN)|5054 (SERPINE1)|5199…
		M	GO|GO.BP	GO:0032103	positive regulation of response to external stimulus	9.24338e-11	1.05338e-05	23	718 (C3)|719 (C3AR1)|728 (C5AR1)|923 (CD6)|1050 (CEBPA)|1230 (CCR1)|1435 (CSF1)|2207 (FCER1G)|3570 (IL6R)|3689 (ITGB2)|4615 (MYD88)|5054 (SERPINE1)|5880 (RAC2)|6279 (S100A8)|6280 (S100A9)|7040 (TGFB1)|7052 (TGM2)|7097 (TLR2)|7132 (TNFRSF1A)|8673 (VAMP8)|8792 (TNFRSF11A)|63940 (GPSM3)|148022 (TICAM1)
		M	GO|GO.BP	GO:0042035	regulation of cytokine biosynthetic process	9.44705e-11	1.07659e-05	14	602 (BCL3)|1051 (CEBPB)|3162 (HMOX1)|3635 (INPP5D)|3659 (IRF1)|5606 (MAP2K3)|5788 (PTPRC)|5970 (RELA)|6693 (SPN)|7096 (TLR1)|7538 (ZFP36)|9261 (MAPKAPK2)|10148 (EBI3)|148022 (TICAM1)
		M	GO|GO.CC	GO:0070062	extracellular exosome	9.70008e-11	1.10542e-05	70	60 (ACTB)|718 (C3)|752 (FMNL1)|929 (CD14)|963 (CD53)|1293 (COL6A3)|1445 (CSK)|1471 (CST3)|1509 (CTSD)|1522 (CTSZ)|1777 (DNASE2)|2215 (FCGR3B)|2268 (FGR)|2289 (FKBP5)|2683 (B4GALT1)|2799 (GNS)|2896 (GRN)|3017 (HIST1H2BD)|3073 (HEXA)|3383 (ICAM1)|3689 (ITGB2)|3693 (ITGB5)|3945 (LDHB)|3956 (LGALS1)|3958 (LGALS3)|4046 (LSP1)|4057 (LTF)|4067 (LYN)|4245 (MGAT1)|4353 (MPO)|4669 (NAGLU)|4860 (PNP)|5045 (…
		M	GO|GO.BP	GO:0071310	cellular response to organic substance	1.00719e-10	1.14779e-05	79	60 (ACTB)|154 (ADRB2)|598 (BCL2L1)|834 (CASP1)|923 (CD6)|929 (CD14)|1050 (CEBPA)|1051 (CEBPB)|1230 (CCR1)|1435 (CSF1)|1439 (CSF2RB)|1445 (CSK)|1520 (CTSS)|1796 (DOK1)|2099 (ESR1)|2162 (F13A1)|2207 (FCER1G)|2357 (FPR1)|3059 (HCLS1)|3077 (HFE)|3099 (HK2)|3162 (HMOX1)|3383 (ICAM1)|3459 (IFNGR1)|3566 (IL4R)|3570 (IL6R)|3635 (INPP5D)|3659 (IRF1)|3689 (ITGB2)|3693 (ITGB5)|3956 (LGALS1)|4057 (LTF)|4067 …
		M	GO|GO.BP	GO:0050729	positive regulation of inflammatory response	1.15907e-10	1.32088e-05	16	718 (C3)|923 (CD6)|1050 (CEBPA)|2207 (FCER1G)|3689 (ITGB2)|4615 (MYD88)|5054 (SERPINE1)|6279 (S100A8)|6280 (S100A9)|7052 (TGM2)|7097 (TLR2)|7132 (TNFRSF1A)|8673 (VAMP8)|8792 (TNFRSF11A)|63940 (GPSM3)|148022 (TICAM1)
		M	GO|GO.BP	GO:0071222	cellular response to lipopolysaccharide	1.20708e-10	1.37559e-05	19	834 (CASP1)|923 (CD6)|929 (CD14)|1051 (CEBPB)|3383 (ICAM1)|4057 (LTF)|4067 (LYN)|5054 (SERPINE1)|5970 (RELA)|6347 (CCL2)|7040 (TGFB1)|7097 (TLR2)|7128 (TNFAIP3)|7133 (TNFRSF1B)|7538 (ZFP36)|22904 (SBNO2)|79155 (TNIP2)|114548 (NLRP3)|148022 (TICAM1)
		M	GO|GO.BP	GO:0022407	regulation of cell-cell adhesion	1.30156e-10	1.48325e-05	26	923 (CD6)|1051 (CEBPB)|1445 (CSK)|3077 (HFE)|3383 (ICAM1)|3566 (IL4R)|3570 (IL6R)|3659 (IRF1)|3956 (LGALS1)|3958 (LGALS3)|4067 (LYN)|4860 (PNP)|5580 (PRKCD)|5788 (PTPRC)|6347 (CCL2)|6693 (SPN)|7040 (TGFB1)|8808 (IL1RL2)|9308 (CD83)|10148 (EBI3)|23308 (ICOSLG)|30835 (CD209)|54440 (SASH3)|83706 (FERMT3)|84959 (UBASH3B)|114548 (NLRP3)
		M	GO|GO.CC	GO:0005773	vacuole	1.30234e-10	1.48414e-05	37	154 (ADRB2)|215 (ABCD1)|718 (C3)|719 (C3AR1)|1509 (CTSD)|1520 (CTSS)|1522 (CTSZ)|1777 (DNASE2)|2357 (FPR1)|2683 (B4GALT1)|2799 (GNS)|2896 (GRN)|3073 (HEXA)|4067 (LYN)|4353 (MPO)|4669 (NAGLU)|4688 (NCF2)|4689 (NCF4)|5580 (PRKCD)|6039 (RNASE6)|6948 (TCN2)|7107 (GPR137B)|7128 (TNFAIP3)|7462 (LAT2)|8673 (VAMP8)|9145 (SYNGR1)|10312 (TCIRG1)|51296 (SLC15A3)|54918 (CMTM6)|57153 (SLC44A2)|79887 (PLBD1)|8…
		M	GO|GO.BP	GO:0043304	regulation of mast cell degranulation	1.49252e-10	1.70088e-05	9	2207 (FCER1G)|2242 (FES)|2268 (FGR)|3162 (HMOX1)|3566 (IL4R)|4067 (LYN)|5880 (RAC2)|8673 (VAMP8)|8832 (CD84)
		M	GO|GO.BP	GO:0050863	regulation of T cell activation	1.57005e-10	1.78922e-05	23	923 (CD6)|1051 (CEBPB)|1445 (CSK)|3077 (HFE)|3566 (IL4R)|3570 (IL6R)|3659 (IRF1)|3956 (LGALS1)|3958 (LGALS3)|4067 (LYN)|4860 (PNP)|5788 (PTPRC)|5880 (RAC2)|6347 (CCL2)|6693 (SPN)|7040 (TGFB1)|8808 (IL1RL2)|9308 (CD83)|10148 (EBI3)|23308 (ICOSLG)|30835 (CD209)|54440 (SASH3)|114548 (NLRP3)
		M	GO|GO.BP	GO:0032502	developmental process	1.67959e-10	1.91406e-05	143	60 (ACTB)|154 (ADRB2)|215 (ABCD1)|463 (ZFHX3)|598 (BCL2L1)|602 (BCL3)|694 (BTG1)|713 (C1QB)|714 (C1QC)|718 (C3)|719 (C3AR1)|728 (C5AR1)|752 (FMNL1)|963 (CD53)|1050 (CEBPA)|1051 (CEBPB)|1230 (CCR1)|1293 (COL6A3)|1435 (CSF1)|1445 (CSK)|1471 (CST3)|1522 (CTSZ)|1777 (DNASE2)|1796 (DOK1)|2000 (ELF4)|2099 (ESR1)|2207 (FCER1G)|2242 (FES)|2268 (FGR)|2683 (B4GALT1)|2872 (MKNK2)|3059 (HCLS1)|3077 (HFE)|309…
		M	GO|GO.BP	GO:0002250	adaptive immune response	2.04187e-10	2.32691e-05	33	602 (BCL3)|713 (C1QB)|714 (C1QC)|718 (C3)|923 (CD6)|1445 (CSK)|1520 (CTSS)|2207 (FCER1G)|3077 (HFE)|3383 (ICAM1)|3566 (IL4R)|3570 (IL6R)|3635 (INPP5D)|3659 (IRF1)|4067 (LYN)|4791 (NFKB2)|5452 (POU2F2)|5580 (PRKCD)|5788 (PTPRC)|6693 (SPN)|6778 (STAT6)|7040 (TGFB1)|7128 (TNFAIP3)|7462 (LAT2)|8792 (TNFRSF11A)|8832 (CD84)|10148 (EBI3)|23308 (ICOSLG)|30835 (CD209)|51279 (C1RL)|54440 (SASH3)|81622 (UNC…
		M	GO|GO.CC	GO:0005615	extracellular space	2.07719e-10	2.36716e-05	96	60 (ACTB)|713 (C1QB)|714 (C1QC)|718 (C3)|752 (FMNL1)|929 (CD14)|963 (CD53)|1293 (COL6A3)|1435 (CSF1)|1445 (CSK)|1471 (CST3)|1509 (CTSD)|1520 (CTSS)|1522 (CTSZ)|1777 (DNASE2)|2162 (F13A1)|2215 (FCGR3B)|2268 (FGR)|2289 (FKBP5)|2683 (B4GALT1)|2799 (GNS)|2896 (GRN)|3017 (HIST1H2BD)|3073 (HEXA)|3077 (HFE)|3162 (HMOX1)|3383 (ICAM1)|3566 (IL4R)|3570 (IL6R)|3689 (ITGB2)|3693 (ITGB5)|3945 (LDHB)|3956 (LGA…
		M	GO|GO.BP	GO:0033006	regulation of mast cell activation involved in immune response	2.13651e-10	2.43477e-05	9	2207 (FCER1G)|2242 (FES)|2268 (FGR)|3162 (HMOX1)|3566 (IL4R)|4067 (LYN)|5880 (RAC2)|8673 (VAMP8)|8832 (CD84)
		M	GO|GO.BP	GO:0070661	leukocyte proliferation	2.22984e-10	2.54113e-05	22	923 (CD6)|1051 (CEBPB)|1435 (CSF1)|2000 (ELF4)|3570 (IL6R)|3635 (INPP5D)|3659 (IRF1)|3958 (LGALS3)|4067 (LYN)|4860 (PNP)|5580 (PRKCD)|5788 (PTPRC)|5880 (RAC2)|6693 (SPN)|7040 (TGFB1)|7128 (TNFAIP3)|10148 (EBI3)|23228 (PLCL2)|23308 (ICOSLG)|30835 (CD209)|54440 (SASH3)|148022 (TICAM1)
		M	GO|GO.MF	GO:0005515	protein binding	2.57907e-10	2.93911e-05	223	60 (ACTB)|154 (ADRB2)|215 (ABCD1)|241 (ALOX5AP)|463 (ZFHX3)|598 (BCL2L1)|602 (BCL3)|637 (BID)|694 (BTG1)|713 (C1QB)|714 (C1QC)|718 (C3)|728 (C5AR1)|752 (FMNL1)|834 (CASP1)|923 (CD6)|929 (CD14)|963 (CD53)|1050 (CEBPA)|1051 (CEBPB)|1230 (CCR1)|1435 (CSF1)|1439 (CSF2RB)|1445 (CSK)|1471 (CST3)|1509 (CTSD)|1520 (CTSS)|1522 (CTSZ)|1796 (DOK1)|1820 (ARID3A)|2000 (ELF4)|2014 (EMP3)|2099 (ESR1)|2207 (FCER…
		M	GO|GO.CC	GO:0005886	plasma membrane	2.94524e-10	3.3564e-05	131	60 (ACTB)|140 (ADORA3)|154 (ADRB2)|602 (BCL3)|718 (C3)|719 (C3AR1)|728 (C5AR1)|752 (FMNL1)|923 (CD6)|929 (CD14)|963 (CD53)|1230 (CCR1)|1293 (COL6A3)|1435 (CSF1)|1439 (CSF2RB)|1445 (CSK)|1522 (CTSZ)|2014 (EMP3)|2099 (ESR1)|2207 (FCER1G)|2212 (FCGR2A)|2215 (FCGR3B)|2242 (FES)|2268 (FGR)|2357 (FPR1)|2683 (B4GALT1)|2687 (GGT5)|3059 (HCLS1)|3077 (HFE)|3099 (HK2)|3162 (HMOX1)|3383 (ICAM1)|3459 (IFNGR1)…
		M	GO|GO.BP	GO:0051246	regulation of protein metabolic process	3.11915e-10	3.55459e-05	83	60 (ACTB)|154 (ADRB2)|602 (BCL3)|637 (BID)|713 (C1QB)|714 (C1QC)|718 (C3)|719 (C3AR1)|728 (C5AR1)|834 (CASP1)|1050 (CEBPA)|1051 (CEBPB)|1230 (CCR1)|1293 (COL6A3)|1435 (CSF1)|1445 (CSK)|1471 (CST3)|1522 (CTSZ)|2268 (FGR)|2357 (FPR1)|2872 (MKNK2)|3059 (HCLS1)|3077 (HFE)|3162 (HMOX1)|3383 (ICAM1)|3570 (IL6R)|3635 (INPP5D)|3659 (IRF1)|3689 (ITGB2)|3937 (LCP2)|3958 (LGALS3)|4057 (LTF)|4067 (LYN)|5045 …
		M	GO|GO.BP	GO:0030154	cell differentiation	3.53033e-10	4.02316e-05	106	154 (ADRB2)|463 (ZFHX3)|598 (BCL2L1)|602 (BCL3)|694 (BTG1)|714 (C1QC)|963 (CD53)|1050 (CEBPA)|1051 (CEBPB)|1230 (CCR1)|1293 (COL6A3)|1435 (CSF1)|1445 (CSK)|1522 (CTSZ)|1777 (DNASE2)|1796 (DOK1)|2000 (ELF4)|2099 (ESR1)|2207 (FCER1G)|2242 (FES)|2268 (FGR)|2683 (B4GALT1)|3059 (HCLS1)|3383 (ICAM1)|3566 (IL4R)|3570 (IL6R)|3635 (INPP5D)|3659 (IRF1)|3689 (ITGB2)|3693 (ITGB5)|3955 (LFNG)|3956 (LGALS1)|39…
		M	GO|GO.BP	GO:0043300	regulation of leukocyte degranulation	3.81388e-10	4.34629e-05	10	2207 (FCER1G)|2242 (FES)|2268 (FGR)|3162 (HMOX1)|3566 (IL4R)|3689 (ITGB2)|4067 (LYN)|5880 (RAC2)|8673 (VAMP8)|8832 (CD84)
		M	GO|GO.BP	GO:0042089	cytokine biosynthetic process	4.30556e-10	4.90661e-05	14	602 (BCL3)|1051 (CEBPB)|3162 (HMOX1)|3635 (INPP5D)|3659 (IRF1)|5606 (MAP2K3)|5788 (PTPRC)|5970 (RELA)|6693 (SPN)|7096 (TLR1)|7538 (ZFP36)|9261 (MAPKAPK2)|10148 (EBI3)|148022 (TICAM1)
		M	GO|GO.BP	GO:0032943	mononuclear cell proliferation	4.37257e-10	4.98298e-05	21	923 (CD6)|1051 (CEBPB)|1435 (CSF1)|2000 (ELF4)|3570 (IL6R)|3635 (INPP5D)|3659 (IRF1)|3958 (LGALS3)|4067 (LYN)|4860 (PNP)|5580 (PRKCD)|5788 (PTPRC)|5880 (RAC2)|6693 (SPN)|7040 (TGFB1)|10148 (EBI3)|23228 (PLCL2)|23308 (ICOSLG)|30835 (CD209)|54440 (SASH3)|148022 (TICAM1)
		M	GO|GO.CC	GO:0016020	membrane	4.44284e-10	5.06306e-05	191	60 (ACTB)|140 (ADORA3)|154 (ADRB2)|215 (ABCD1)|241 (ALOX5AP)|598 (BCL2L1)|602 (BCL3)|637 (BID)|718 (C3)|719 (C3AR1)|728 (C5AR1)|752 (FMNL1)|923 (CD6)|929 (CD14)|963 (CD53)|1040 (CDS1)|1230 (CCR1)|1293 (COL6A3)|1435 (CSF1)|1439 (CSF2RB)|1445 (CSK)|1509 (CTSD)|1522 (CTSZ)|1820 (ARID3A)|2014 (EMP3)|2099 (ESR1)|2207 (FCER1G)|2212 (FCGR2A)|2215 (FCGR3B)|2242 (FES)|2268 (FGR)|2289 (FKBP5)|2357 (FPR1)|2…
		M	GO|GO.BP	GO:0042107	cytokine metabolic process	4.89615e-10	5.57966e-05	14	602 (BCL3)|1051 (CEBPB)|3162 (HMOX1)|3635 (INPP5D)|3659 (IRF1)|5606 (MAP2K3)|5788 (PTPRC)|5970 (RELA)|6693 (SPN)|7096 (TLR1)|7538 (ZFP36)|9261 (MAPKAPK2)|10148 (EBI3)|148022 (TICAM1)
		M	GO|GO.BP	GO:0070663	regulation of leukocyte proliferation	4.92351e-10	5.61084e-05	19	923 (CD6)|1051 (CEBPB)|1435 (CSF1)|3570 (IL6R)|3635 (INPP5D)|3659 (IRF1)|3958 (LGALS3)|4067 (LYN)|4860 (PNP)|5788 (PTPRC)|5880 (RAC2)|6693 (SPN)|7040 (TGFB1)|7128 (TNFAIP3)|10148 (EBI3)|23308 (ICOSLG)|30835 (CD209)|54440 (SASH3)|148022 (TICAM1)
		M	GO|GO.CC	GO:0071944	cell periphery	5.48983e-10	6.25622e-05	132	60 (ACTB)|140 (ADORA3)|154 (ADRB2)|602 (BCL3)|718 (C3)|719 (C3AR1)|728 (C5AR1)|752 (FMNL1)|923 (CD6)|929 (CD14)|963 (CD53)|1230 (CCR1)|1293 (COL6A3)|1435 (CSF1)|1439 (CSF2RB)|1445 (CSK)|1522 (CTSZ)|2014 (EMP3)|2099 (ESR1)|2207 (FCER1G)|2212 (FCGR2A)|2215 (FCGR3B)|2242 (FES)|2268 (FGR)|2357 (FPR1)|2683 (B4GALT1)|2687 (GGT5)|3059 (HCLS1)|3077 (HFE)|3099 (HK2)|3162 (HMOX1)|3383 (ICAM1)|3459 (IFNGR1)…
		M	GO|GO.BP	GO:0042221	response to chemical	5.53291e-10	6.3053e-05	115	60 (ACTB)|154 (ADRB2)|215 (ABCD1)|241 (ALOX5AP)|463 (ZFHX3)|598 (BCL2L1)|694 (BTG1)|719 (C3AR1)|728 (C5AR1)|834 (CASP1)|923 (CD6)|929 (CD14)|1050 (CEBPA)|1051 (CEBPB)|1230 (CCR1)|1435 (CSF1)|1439 (CSF2RB)|1445 (CSK)|1520 (CTSS)|1796 (DOK1)|2099 (ESR1)|2162 (F13A1)|2207 (FCER1G)|2242 (FES)|2357 (FPR1)|2872 (MKNK2)|3059 (HCLS1)|3077 (HFE)|3099 (HK2)|3162 (HMOX1)|3383 (ICAM1)|3459 (IFNGR1)|3566 (IL4…
		M	GO|GO.BP	GO:0045576	mast cell activation	5.63584e-10	6.42261e-05	11	2207 (FCER1G)|2242 (FES)|2268 (FGR)|3162 (HMOX1)|3566 (IL4R)|3937 (LCP2)|4067 (LYN)|5880 (RAC2)|7462 (LAT2)|8673 (VAMP8)|8832 (CD84)
		M	GO|GO.BP	GO:0012501	programmed cell death	5.88283e-10	6.70407e-05	67	598 (BCL2L1)|602 (BCL3)|637 (BID)|694 (BTG1)|728 (C5AR1)|834 (CASP1)|929 (CD14)|1051 (CEBPB)|1522 (CTSZ)|1777 (DNASE2)|2099 (ESR1)|2207 (FCER1G)|2683 (B4GALT1)|2872 (MKNK2)|3059 (HCLS1)|3099 (HK2)|3162 (HMOX1)|3383 (ICAM1)|3570 (IL6R)|3635 (INPP5D)|3659 (IRF1)|3689 (ITGB2)|3956 (LGALS1)|3958 (LGALS3)|4057 (LTF)|4067 (LYN)|4353 (MPO)|4615 (MYD88)|4836 (NMT1)|5045 (FURIN)|5054 (SERPINE1)|5580 (PRKC…
		M	GO|GO.BP	GO:0010646	regulation of cell communication	5.98159e-10	6.81662e-05	95	154 (ADRB2)|598 (BCL2L1)|602 (BCL3)|637 (BID)|718 (C3)|728 (C5AR1)|834 (CASP1)|929 (CD14)|1230 (CCR1)|1435 (CSF1)|1445 (CSK)|1796 (DOK1)|2099 (ESR1)|2268 (FGR)|2357 (FPR1)|2896 (GRN)|3059 (HCLS1)|3077 (HFE)|3162 (HMOX1)|3383 (ICAM1)|3459 (IFNGR1)|3570 (IL6R)|3635 (INPP5D)|3659 (IRF1)|3927 (LASP1)|3955 (LFNG)|3956 (LGALS1)|3958 (LGALS3)|4057 (LTF)|4067 (LYN)|4615 (MYD88)|4836 (NMT1)|5045 (FURIN)|5…
		M	GO|GO.BP	GO:0043303	mast cell degranulation	6.267e-10	7.14187e-05	10	2207 (FCER1G)|2242 (FES)|2268 (FGR)|3162 (HMOX1)|3566 (IL4R)|4067 (LYN)|5880 (RAC2)|7462 (LAT2)|8673 (VAMP8)|8832 (CD84)
		M	GO|GO.BP	GO:0002703	regulation of leukocyte mediated immunity	7.08579e-10	8.07496e-05	18	718 (C3)|2207 (FCER1G)|2242 (FES)|2268 (FGR)|3077 (HFE)|3162 (HMOX1)|3566 (IL4R)|3689 (ITGB2)|4067 (LYN)|5788 (PTPRC)|5880 (RAC2)|6778 (STAT6)|7040 (TGFB1)|8673 (VAMP8)|8832 (CD84)|54440 (SASH3)|114548 (NLRP3)|148022 (TICAM1)
		M	GO|GO.BP	GO:0006915	apoptotic process	7.2089e-10	8.21526e-05	64	598 (BCL2L1)|602 (BCL3)|637 (BID)|694 (BTG1)|728 (C5AR1)|834 (CASP1)|929 (CD14)|1051 (CEBPB)|1522 (CTSZ)|1777 (DNASE2)|2099 (ESR1)|2207 (FCER1G)|2683 (B4GALT1)|2872 (MKNK2)|3059 (HCLS1)|3099 (HK2)|3162 (HMOX1)|3383 (ICAM1)|3570 (IL6R)|3635 (INPP5D)|3659 (IRF1)|3689 (ITGB2)|3956 (LGALS1)|3958 (LGALS3)|4057 (LTF)|4067 (LYN)|4353 (MPO)|4615 (MYD88)|4836 (NMT1)|5054 (SERPINE1)|5580 (PRKCD)|5788 (PTPR…
		M	GO|GO.BP	GO:0002279	mast cell activation involved in immune response	7.95403e-10	9.06441e-05	10	2207 (FCER1G)|2242 (FES)|2268 (FGR)|3162 (HMOX1)|3566 (IL4R)|4067 (LYN)|5880 (RAC2)|7462 (LAT2)|8673 (VAMP8)|8832 (CD84)
		M	GO|GO.BP	GO:0065009	regulation of molecular function	9.42101e-10	0.000107362	88	60 (ACTB)|140 (ADORA3)|154 (ADRB2)|241 (ALOX5AP)|602 (BCL3)|637 (BID)|718 (C3)|728 (C5AR1)|834 (CASP1)|1050 (CEBPA)|1293 (COL6A3)|1435 (CSF1)|1445 (CSK)|1471 (CST3)|1520 (CTSS)|1522 (CTSZ)|2099 (ESR1)|2268 (FGR)|2357 (FPR1)|2896 (GRN)|3059 (HCLS1)|3077 (HFE)|3162 (HMOX1)|3383 (ICAM1)|3570 (IL6R)|3689 (ITGB2)|3937 (LCP2)|3955 (LFNG)|3958 (LGALS3)|4057 (LTF)|4067 (LYN)|4615 (MYD88)|4688 (NCF2)|4689…
		M	GO|GO.BP	GO:0002448	mast cell mediated immunity	1.00329e-09	0.000114335	10	2207 (FCER1G)|2242 (FES)|2268 (FGR)|3162 (HMOX1)|3566 (IL4R)|4067 (LYN)|5880 (RAC2)|7462 (LAT2)|8673 (VAMP8)|8832 (CD84)
		M	GO|GO.BP	GO:0023051	regulation of signaling	1.01883e-09	0.000116106	95	154 (ADRB2)|598 (BCL2L1)|602 (BCL3)|637 (BID)|718 (C3)|728 (C5AR1)|834 (CASP1)|929 (CD14)|1230 (CCR1)|1435 (CSF1)|1445 (CSK)|1796 (DOK1)|2099 (ESR1)|2268 (FGR)|2357 (FPR1)|2896 (GRN)|3059 (HCLS1)|3077 (HFE)|3162 (HMOX1)|3383 (ICAM1)|3459 (IFNGR1)|3570 (IL6R)|3635 (INPP5D)|3659 (IRF1)|3927 (LASP1)|3955 (LFNG)|3956 (LGALS1)|3958 (LGALS3)|4057 (LTF)|4067 (LYN)|4615 (MYD88)|4836 (NMT1)|5045 (FURIN)|5…
		M	GO|GO.BP	GO:0098657	import into cell	1.382e-09	0.000157492	39	60 (ACTB)|154 (ADRB2)|598 (BCL2L1)|718 (C3)|923 (CD6)|929 (CD14)|1445 (CSK)|2207 (FCER1G)|2212 (FCGR2A)|2268 (FGR)|3077 (HFE)|3689 (ITGB2)|3958 (LGALS3)|4067 (LYN)|4481 (MSR1)|4688 (NCF2)|4689 (NCF4)|5054 (SERPINE1)|5580 (PRKCD)|5788 (PTPRC)|6347 (CCL2)|6614 (SIGLEC1)|7040 (TGFB1)|7052 (TGM2)|7097 (TLR2)|7867 (MAPKAPK3)|8527 (DGKD)|9261 (MAPKAPK2)|9332 (CD163)|10163 (WASF2)|23166 (STAB1)|29904 (E…
		M	GO|GO.BP	GO:0032944	regulation of mononuclear cell proliferation	1.58396e-09	0.000180508	18	923 (CD6)|1051 (CEBPB)|1435 (CSF1)|3570 (IL6R)|3635 (INPP5D)|3659 (IRF1)|3958 (LGALS3)|4067 (LYN)|4860 (PNP)|5788 (PTPRC)|5880 (RAC2)|6693 (SPN)|7040 (TGFB1)|10148 (EBI3)|23308 (ICOSLG)|30835 (CD209)|54440 (SASH3)|148022 (TICAM1)
		M	GO|GO.BP	GO:0030099	myeloid cell differentiation	1.64069e-09	0.000186973	25	714 (C1QC)|1050 (CEBPA)|1051 (CEBPB)|1230 (CCR1)|1435 (CSF1)|1777 (DNASE2)|2207 (FCER1G)|2242 (FES)|3059 (HCLS1)|3635 (INPP5D)|3958 (LGALS3)|4057 (LTF)|4067 (LYN)|7040 (TGFB1)|7097 (TLR2)|7305 (TYROBP)|7538 (ZFP36)|8792 (TNFRSF11A)|10163 (WASF2)|10320 (IKZF1)|22904 (SBNO2)|23218 (NBEAL2)|25946 (ZNF385A)|54209 (TREM2)|84959 (UBASH3B)
		M	GO|GO.BP	GO:0002683	negative regulation of immune system process	1.66312e-09	0.000189529	26	714 (C1QC)|929 (CD14)|1051 (CEBPB)|2207 (FCER1G)|3077 (HFE)|3162 (HMOX1)|3566 (IL4R)|3635 (INPP5D)|3659 (IRF1)|3958 (LGALS3)|4057 (LTF)|4067 (LYN)|5788 (PTPRC)|6347 (CCL2)|6693 (SPN)|6778 (STAT6)|7040 (TGFB1)|7128 (TNFAIP3)|7538 (ZFP36)|8832 (CD84)|23228 (PLCL2)|55024 (BANK1)|60343 (FAM3A)|63906 (GPATCH3)|84959 (UBASH3B)|148022 (TICAM1)
		M	GO|GO.BP	GO:0048731	system development	1.6969e-09	0.000193379	116	60 (ACTB)|154 (ADRB2)|215 (ABCD1)|463 (ZFHX3)|598 (BCL2L1)|602 (BCL3)|694 (BTG1)|713 (C1QB)|714 (C1QC)|718 (C3)|719 (C3AR1)|728 (C5AR1)|1050 (CEBPA)|1051 (CEBPB)|1230 (CCR1)|1293 (COL6A3)|1435 (CSF1)|1445 (CSK)|1522 (CTSZ)|1777 (DNASE2)|1796 (DOK1)|2099 (ESR1)|2207 (FCER1G)|2242 (FES)|2683 (B4GALT1)|2872 (MKNK2)|3059 (HCLS1)|3077 (HFE)|3099 (HK2)|3162 (HMOX1)|3383 (ICAM1)|3566 (IL4R)|3570 (IL6R)|…
		M	GO|GO.CC	GO:0044421	extracellular region part	1.8121e-09	0.000206507	97	60 (ACTB)|713 (C1QB)|714 (C1QC)|718 (C3)|752 (FMNL1)|929 (CD14)|963 (CD53)|1293 (COL6A3)|1435 (CSF1)|1445 (CSK)|1471 (CST3)|1509 (CTSD)|1520 (CTSS)|1522 (CTSZ)|1777 (DNASE2)|2162 (F13A1)|2215 (FCGR3B)|2268 (FGR)|2289 (FKBP5)|2683 (B4GALT1)|2799 (GNS)|2896 (GRN)|3017 (HIST1H2BD)|3073 (HEXA)|3077 (HFE)|3162 (HMOX1)|3383 (ICAM1)|3566 (IL4R)|3570 (IL6R)|3689 (ITGB2)|3693 (ITGB5)|3945 (LDHB)|3955 (LFN…
		M	GO|GO.BP	GO:0002697	regulation of immune effector process	1.83071e-09	0.000208628	26	713 (C1QB)|714 (C1QC)|718 (C3)|719 (C3AR1)|728 (C5AR1)|2207 (FCER1G)|2242 (FES)|2268 (FGR)|3077 (HFE)|3162 (HMOX1)|3566 (IL4R)|3689 (ITGB2)|3958 (LGALS3)|4067 (LYN)|5199 (CFP)|5788 (PTPRC)|5880 (RAC2)|6778 (STAT6)|7040 (TGFB1)|7128 (TNFAIP3)|8673 (VAMP8)|8832 (CD84)|54440 (SASH3)|63906 (GPATCH3)|114548 (NLRP3)|148022 (TICAM1)
		M	GO|GO.BP	GO:0050793	regulation of developmental process	1.89892e-09	0.000216401	76	154 (ADRB2)|463 (ZFHX3)|694 (BTG1)|714 (C1QC)|718 (C3)|719 (C3AR1)|728 (C5AR1)|752 (FMNL1)|963 (CD53)|1050 (CEBPA)|1051 (CEBPB)|1230 (CCR1)|1435 (CSF1)|1471 (CST3)|1522 (CTSZ)|2099 (ESR1)|2242 (FES)|2268 (FGR)|3059 (HCLS1)|3099 (HK2)|3162 (HMOX1)|3383 (ICAM1)|3566 (IL4R)|3570 (IL6R)|3635 (INPP5D)|3659 (IRF1)|3689 (ITGB2)|3955 (LFNG)|3956 (LGALS1)|3958 (LGALS3)|4057 (LTF)|4067 (LYN)|4481 (MSR1)|48…
		M	GO|GO.BP	GO:0002699	positive regulation of immune effector process	1.99774e-09	0.000227662	18	718 (C3)|2207 (FCER1G)|2242 (FES)|2268 (FGR)|3077 (HFE)|3162 (HMOX1)|3566 (IL4R)|3689 (ITGB2)|4067 (LYN)|5788 (PTPRC)|5880 (RAC2)|6778 (STAT6)|7040 (TGFB1)|8673 (VAMP8)|8832 (CD84)|54440 (SASH3)|114548 (NLRP3)|148022 (TICAM1)
		M	GO|GO.BP	GO:0065008	regulation of biological quality	2.10697e-09	0.00024011	100	60 (ACTB)|154 (ADRB2)|215 (ABCD1)|598 (BCL2L1)|602 (BCL3)|637 (BID)|718 (C3)|719 (C3AR1)|728 (C5AR1)|752 (FMNL1)|1050 (CEBPA)|1051 (CEBPB)|1230 (CCR1)|1435 (CSF1)|1445 (CSK)|1522 (CTSZ)|1777 (DNASE2)|2099 (ESR1)|2162 (F13A1)|2207 (FCER1G)|2242 (FES)|2268 (FGR)|2357 (FPR1)|3059 (HCLS1)|3077 (HFE)|3099 (HK2)|3101 (HK3)|3162 (HMOX1)|3383 (ICAM1)|3566 (IL4R)|3635 (INPP5D)|3659 (IRF1)|3689 (ITGB2)|393…
		M	GO|GO.BP	GO:0048856	anatomical structure development	2.12477e-09	0.000242139	133	60 (ACTB)|154 (ADRB2)|215 (ABCD1)|463 (ZFHX3)|598 (BCL2L1)|602 (BCL3)|694 (BTG1)|713 (C1QB)|714 (C1QC)|718 (C3)|719 (C3AR1)|728 (C5AR1)|752 (FMNL1)|963 (CD53)|1050 (CEBPA)|1051 (CEBPB)|1230 (CCR1)|1293 (COL6A3)|1435 (CSF1)|1445 (CSK)|1471 (CST3)|1522 (CTSZ)|1777 (DNASE2)|1796 (DOK1)|2099 (ESR1)|2207 (FCER1G)|2242 (FES)|2268 (FGR)|2683 (B4GALT1)|2872 (MKNK2)|3059 (HCLS1)|3077 (HFE)|3099 (HK2)|3162…
		M	GO|GO.BP	GO:0042742	defense response to bacterium	2.13234e-09	0.000243001	22	602 (BCL3)|728 (C5AR1)|1051 (CEBPB)|2207 (FCER1G)|2268 (FGR)|3570 (IL6R)|4057 (LTF)|4353 (MPO)|4615 (MYD88)|5054 (SERPINE1)|5199 (CFP)|5580 (PRKCD)|6039 (RNASE6)|6279 (S100A8)|6280 (S100A9)|6693 (SPN)|7097 (TLR2)|7100 (TLR5)|7132 (TNFRSF1A)|23166 (STAB1)|79792 (GSDMD)|114548 (NLRP3)
		M	GO|GO.BP	GO:0002526	acute inflammatory response	2.32679e-09	0.00026516	18	713 (C1QB)|714 (C1QC)|718 (C3)|719 (C3AR1)|728 (C5AR1)|923 (CD6)|1051 (CEBPB)|2207 (FCER1G)|2683 (B4GALT1)|3077 (HFE)|3383 (ICAM1)|3570 (IL6R)|5199 (CFP)|6279 (S100A8)|8792 (TNFRSF11A)|9332 (CD163)|26471 (NUPR1)|114548 (NLRP3)
		M	GO|GO.BP	GO:0046651	lymphocyte proliferation	2.35639e-09	0.000268535	20	923 (CD6)|1051 (CEBPB)|2000 (ELF4)|3570 (IL6R)|3635 (INPP5D)|3659 (IRF1)|3958 (LGALS3)|4067 (LYN)|4860 (PNP)|5580 (PRKCD)|5788 (PTPRC)|5880 (RAC2)|6693 (SPN)|7040 (TGFB1)|10148 (EBI3)|23228 (PLCL2)|23308 (ICOSLG)|30835 (CD209)|54440 (SASH3)|148022 (TICAM1)
		M	GO|GO.BP	GO:1902105	regulation of leukocyte differentiation	2.51544e-09	0.00028666	20	714 (C1QC)|1051 (CEBPB)|1230 (CCR1)|1435 (CSF1)|3059 (HCLS1)|3566 (IL4R)|3635 (INPP5D)|3659 (IRF1)|4057 (LTF)|4067 (LYN)|4860 (PNP)|5788 (PTPRC)|7040 (TGFB1)|7305 (TYROBP)|8808 (IL1RL2)|9308 (CD83)|54440 (SASH3)|84959 (UBASH3B)|114548 (NLRP3)|150372 (NFAM1)
		M	GO|GO.CC	GO:0070820	tertiary granule	2.64737e-09	0.000301694	16	963 (CD53)|1471 (CST3)|1509 (CTSD)|1520 (CTSS)|2207 (FCER1G)|2357 (FPR1)|3689 (ITGB2)|3958 (LGALS3)|4057 (LTF)|5199 (CFP)|8673 (VAMP8)|10312 (TCIRG1)|23218 (NBEAL2)|25840 (METTL7A)|79792 (GSDMD)|81619 (TSPAN14)
		M	GO|GO.CC	GO:0005576	extracellular region	2.84401e-09	0.000324104	111	60 (ACTB)|713 (C1QB)|714 (C1QC)|718 (C3)|752 (FMNL1)|923 (CD6)|929 (CD14)|963 (CD53)|1293 (COL6A3)|1435 (CSF1)|1445 (CSK)|1471 (CST3)|1509 (CTSD)|1520 (CTSS)|1522 (CTSZ)|1777 (DNASE2)|2162 (F13A1)|2215 (FCGR3B)|2268 (FGR)|2289 (FKBP5)|2683 (B4GALT1)|2799 (GNS)|2896 (GRN)|3017 (HIST1H2BD)|3073 (HEXA)|3077 (HFE)|3101 (HK3)|3162 (HMOX1)|3383 (ICAM1)|3566 (IL4R)|3570 (IL6R)|3689 (ITGB2)|3693 (ITGB5)|…
		M	GO|GO.BP	GO:1903039	positive regulation of leukocyte cell-cell adhesion	2.91512e-09	0.000332207	18	923 (CD6)|1445 (CSK)|3383 (ICAM1)|3566 (IL4R)|3570 (IL6R)|3956 (LGALS1)|4067 (LYN)|4860 (PNP)|5788 (PTPRC)|6347 (CCL2)|7040 (TGFB1)|8808 (IL1RL2)|9308 (CD83)|10148 (EBI3)|23308 (ICOSLG)|30835 (CD209)|54440 (SASH3)|114548 (NLRP3)
		M	GO|GO.BP	GO:0008219	cell death	2.98044e-09	0.000339651	68	598 (BCL2L1)|602 (BCL3)|637 (BID)|694 (BTG1)|728 (C5AR1)|834 (CASP1)|929 (CD14)|1051 (CEBPB)|1522 (CTSZ)|1777 (DNASE2)|2014 (EMP3)|2099 (ESR1)|2207 (FCER1G)|2683 (B4GALT1)|2872 (MKNK2)|3059 (HCLS1)|3099 (HK2)|3162 (HMOX1)|3383 (ICAM1)|3570 (IL6R)|3635 (INPP5D)|3659 (IRF1)|3689 (ITGB2)|3956 (LGALS1)|3958 (LGALS3)|4057 (LTF)|4067 (LYN)|4353 (MPO)|4615 (MYD88)|4836 (NMT1)|5045 (FURIN)|5054 (SERPINE1…
		M	GO|GO.CC	GO:0098588	bounding membrane of organelle	3.615e-09	0.000411966	64	154 (ADRB2)|215 (ABCD1)|598 (BCL2L1)|637 (BID)|719 (C3AR1)|728 (C5AR1)|929 (CD14)|963 (CD53)|1522 (CTSZ)|2207 (FCER1G)|2212 (FCGR2A)|2215 (FCGR3B)|2357 (FPR1)|2683 (B4GALT1)|3099 (HK2)|3689 (ITGB2)|3955 (LFNG)|3958 (LGALS3)|4245 (MGAT1)|4481 (MSR1)|4615 (MYD88)|4689 (NCF4)|5045 (FURIN)|5351 (PLOD1)|5788 (PTPRC)|5880 (RAC2)|6892 (TAPBP)|7096 (TLR1)|7097 (TLR2)|7107 (GPR137B)|7132 (TNFRSF1A)|7133 (…
		M	GO|GO.BP	GO:0033003	regulation of mast cell activation	3.97571e-09	0.000453072	9	2207 (FCER1G)|2242 (FES)|2268 (FGR)|3162 (HMOX1)|3566 (IL4R)|4067 (LYN)|5880 (RAC2)|8673 (VAMP8)|8832 (CD84)
		M	GO|GO.BP	GO:0051092	positive regulation of NF-kappaB transcription factor activity	4.10786e-09	0.000468132	15	3383 (ICAM1)|3689 (ITGB2)|4057 (LTF)|4615 (MYD88)|4791 (NFKB2)|5970 (RELA)|6279 (S100A8)|6280 (S100A9)|7040 (TGFB1)|7097 (TLR2)|8792 (TNFRSF11A)|8877 (SPHK1)|9830 (TRIM14)|114548 (NLRP3)|148022 (TICAM1)
		M	GO|GO.BP	GO:0042113	B cell activation	4.58323e-09	0.000522305	21	602 (BCL3)|3635 (INPP5D)|3955 (LFNG)|3956 (LGALS1)|4067 (LYN)|5452 (POU2F2)|5580 (PRKCD)|5788 (PTPRC)|6778 (STAT6)|7040 (TGFB1)|7128 (TNFAIP3)|7462 (LAT2)|8935 (SKAP2)|23228 (PLCL2)|23308 (ICOSLG)|54440 (SASH3)|55024 (BANK1)|79155 (TNIP2)|112616 (CMTM7)|148022 (TICAM1)|150372 (NFAM1)
		M	GO|GO.CC	GO:0045121	membrane raft	4.85898e-09	0.00055373	21	929 (CD14)|1445 (CSK)|1509 (CTSD)|1820 (ARID3A)|3162 (HMOX1)|3383 (ICAM1)|3635 (INPP5D)|3689 (ITGB2)|3937 (LCP2)|3945 (LDHB)|4067 (LYN)|5045 (FURIN)|5788 (PTPRC)|6778 (STAT6)|7046 (TGFBR1)|7096 (TLR1)|7097 (TLR2)|7132 (TNFRSF1A)|7133 (TNFRSF1B)|7462 (LAT2)|10287 (RGS19)
		M	GO|GO.CC	GO:0098857	membrane microdomain	5.15008e-09	0.000586903	21	929 (CD14)|1445 (CSK)|1509 (CTSD)|1820 (ARID3A)|3162 (HMOX1)|3383 (ICAM1)|3635 (INPP5D)|3689 (ITGB2)|3937 (LCP2)|3945 (LDHB)|4067 (LYN)|5045 (FURIN)|5788 (PTPRC)|6778 (STAT6)|7046 (TGFBR1)|7096 (TLR1)|7097 (TLR2)|7132 (TNFRSF1A)|7133 (TNFRSF1B)|7462 (LAT2)|10287 (RGS19)
		M	GO|GO.BP	GO:0002573	myeloid leukocyte differentiation	5.4928e-09	0.00062596	17	714 (C1QC)|1050 (CEBPA)|1051 (CEBPB)|1230 (CCR1)|1435 (CSF1)|2207 (FCER1G)|3059 (HCLS1)|3635 (INPP5D)|4057 (LTF)|4067 (LYN)|7040 (TGFB1)|7097 (TLR2)|7305 (TYROBP)|8792 (TNFRSF11A)|22904 (SBNO2)|54209 (TREM2)|84959 (UBASH3B)
		M	GO|GO.BP	GO:0044093	positive regulation of molecular function	5.62501e-09	0.000641026	57	154 (ADRB2)|241 (ALOX5AP)|637 (BID)|728 (C5AR1)|834 (CASP1)|1435 (CSF1)|1445 (CSK)|1520 (CTSS)|2099 (ESR1)|2268 (FGR)|2357 (FPR1)|3059 (HCLS1)|3077 (HFE)|3383 (ICAM1)|3570 (IL6R)|3689 (ITGB2)|3937 (LCP2)|3955 (LFNG)|3958 (LGALS3)|4057 (LTF)|4067 (LYN)|4615 (MYD88)|4688 (NCF2)|4689 (NCF4)|4791 (NFKB2)|5330 (PLCB2)|5341 (PLEK)|5580 (PRKCD)|5606 (MAP2K3)|5788 (PTPRC)|5970 (RELA)|6279 (S100A8)|6280 (…
		M	GO|GO.BP	GO:1902531	regulation of intracellular signal transduction	6.0138e-09	0.000685333	60	154 (ADRB2)|598 (BCL2L1)|602 (BCL3)|637 (BID)|728 (C5AR1)|834 (CASP1)|929 (CD14)|1230 (CCR1)|1435 (CSF1)|1445 (CSK)|2099 (ESR1)|2268 (FGR)|2357 (FPR1)|3059 (HCLS1)|3162 (HMOX1)|3383 (ICAM1)|3570 (IL6R)|3956 (LGALS1)|4057 (LTF)|4067 (LYN)|4615 (MYD88)|5140 (PDE3B)|5341 (PLEK)|5580 (PRKCD)|5606 (MAP2K3)|5788 (PTPRC)|5880 (RAC2)|5970 (RELA)|6279 (S100A8)|6280 (S100A9)|6347 (CCL2)|7040 (TGFB1)|7046 (…
		M	GO|GO.BP	GO:0050794	regulation of cellular process	7.06137e-09	0.000804713	207	60 (ACTB)|140 (ADORA3)|154 (ADRB2)|215 (ABCD1)|463 (ZFHX3)|598 (BCL2L1)|602 (BCL3)|637 (BID)|694 (BTG1)|714 (C1QC)|718 (C3)|719 (C3AR1)|728 (C5AR1)|752 (FMNL1)|834 (CASP1)|923 (CD6)|929 (CD14)|963 (CD53)|1040 (CDS1)|1050 (CEBPA)|1051 (CEBPB)|1230 (CCR1)|1293 (COL6A3)|1435 (CSF1)|1439 (CSF2RB)|1445 (CSK)|1471 (CST3)|1520 (CTSS)|1522 (CTSZ)|1796 (DOK1)|1820 (ARID3A)|2000 (ELF4)|2014 (EMP3)|2099 (ES…
		M	GO|GO.BP	GO:0051091	positive regulation of DNA-binding transcription factor activity	7.84555e-09	0.000894078	19	2099 (ESR1)|3059 (HCLS1)|3383 (ICAM1)|3689 (ITGB2)|4057 (LTF)|4615 (MYD88)|4791 (NFKB2)|5970 (RELA)|6279 (S100A8)|6280 (S100A9)|7040 (TGFB1)|7097 (TLR2)|7480 (WNT10B)|8792 (TNFRSF11A)|8877 (SPHK1)|9830 (TRIM14)|114548 (NLRP3)|148022 (TICAM1)|150372 (NFAM1)
		M	GO|GO.BP	GO:0050870	positive regulation of T cell activation	8.01959e-09	0.000913913	17	923 (CD6)|1445 (CSK)|3566 (IL4R)|3570 (IL6R)|3956 (LGALS1)|4067 (LYN)|4860 (PNP)|5788 (PTPRC)|6347 (CCL2)|7040 (TGFB1)|8808 (IL1RL2)|9308 (CD83)|10148 (EBI3)|23308 (ICOSLG)|30835 (CD209)|54440 (SASH3)|114548 (NLRP3)
		M	GO|GO.BP	GO:0042981	regulation of apoptotic process	8.85335e-09	0.00100893	53	598 (BCL2L1)|602 (BCL3)|637 (BID)|694 (BTG1)|728 (C5AR1)|834 (CASP1)|1051 (CEBPB)|1522 (CTSZ)|2099 (ESR1)|2207 (FCER1G)|2683 (B4GALT1)|3059 (HCLS1)|3162 (HMOX1)|3383 (ICAM1)|3635 (INPP5D)|3956 (LGALS1)|3958 (LGALS3)|4057 (LTF)|4067 (LYN)|4353 (MPO)|4615 (MYD88)|4836 (NMT1)|5054 (SERPINE1)|5580 (PRKCD)|5788 (PTPRC)|5970 (RELA)|6279 (S100A8)|6280 (S100A9)|6347 (CCL2)|6446 (SGK1)|7040 (TGFB1)|7046 (…
		M	GO|GO.BP	GO:0042108	positive regulation of cytokine biosynthetic process	9.21958e-09	0.00105066	10	602 (BCL3)|3162 (HMOX1)|3659 (IRF1)|5788 (PTPRC)|5970 (RELA)|6693 (SPN)|7096 (TLR1)|9261 (MAPKAPK2)|10148 (EBI3)|148022 (TICAM1)
		M	GO|GO.CC	GO:0098589	membrane region	9.61589e-09	0.00109583	21	929 (CD14)|1445 (CSK)|1509 (CTSD)|1820 (ARID3A)|3162 (HMOX1)|3383 (ICAM1)|3635 (INPP5D)|3689 (ITGB2)|3937 (LCP2)|3945 (LDHB)|4067 (LYN)|5045 (FURIN)|5788 (PTPRC)|6778 (STAT6)|7046 (TGFBR1)|7096 (TLR1)|7097 (TLR2)|7132 (TNFRSF1A)|7133 (TNFRSF1B)|7462 (LAT2)|10287 (RGS19)
		M	GO|GO.BP	GO:1901700	response to oxygen-containing compound	9.85758e-09	0.00112337	53	60 (ACTB)|154 (ADRB2)|598 (BCL2L1)|694 (BTG1)|728 (C5AR1)|834 (CASP1)|923 (CD6)|929 (CD14)|1051 (CEBPB)|1439 (CSF2RB)|1445 (CSK)|2099 (ESR1)|3162 (HMOX1)|3383 (ICAM1)|3956 (LGALS1)|4057 (LTF)|4067 (LYN)|4353 (MPO)|4548 (MTR)|4791 (NFKB2)|5029 (P2RY2)|5054 (SERPINE1)|5140 (PDE3B)|5580 (PRKCD)|5829 (PXN)|5970 (RELA)|6256 (RXRA)|6279 (S100A8)|6347 (CCL2)|6696 (SPP1)|6778 (STAT6)|7040 (TGFB1)|7046 (T…
		M	GO|GO.BP	GO:0050670	regulation of lymphocyte proliferation	1.0009e-08	0.00114063	17	923 (CD6)|1051 (CEBPB)|3570 (IL6R)|3635 (INPP5D)|3659 (IRF1)|3958 (LGALS3)|4067 (LYN)|4860 (PNP)|5788 (PTPRC)|5880 (RAC2)|6693 (SPN)|7040 (TGFB1)|10148 (EBI3)|23308 (ICOSLG)|30835 (CD209)|54440 (SASH3)|148022 (TICAM1)
		M	GO|GO.BP	GO:0009653	anatomical structure morphogenesis	1.01024e-08	0.00115127	74	598 (BCL2L1)|602 (BCL3)|694 (BTG1)|718 (C3)|719 (C3AR1)|728 (C5AR1)|752 (FMNL1)|963 (CD53)|1051 (CEBPB)|1293 (COL6A3)|1435 (CSF1)|1471 (CST3)|1522 (CTSZ)|1796 (DOK1)|2099 (ESR1)|2242 (FES)|2268 (FGR)|2683 (B4GALT1)|3099 (HK2)|3162 (HMOX1)|3383 (ICAM1)|3566 (IL4R)|3689 (ITGB2)|3693 (ITGB5)|3955 (LFNG)|4057 (LTF)|4669 (NAGLU)|4791 (NFKB2)|4814 (NINJ1)|5054 (SERPINE1)|5140 (PDE3B)|5880 (RAC2)|5970 (…
		M	GO|GO.BP	GO:0051090	regulation of DNA-binding transcription factor activity	1.0882e-08	0.00124012	24	140 (ADORA3)|2099 (ESR1)|3059 (HCLS1)|3162 (HMOX1)|3383 (ICAM1)|3689 (ITGB2)|4057 (LTF)|4615 (MYD88)|4791 (NFKB2)|4794 (NFKBIE)|5970 (RELA)|6279 (S100A8)|6280 (S100A9)|6446 (SGK1)|7040 (TGFB1)|7097 (TLR2)|7128 (TNFAIP3)|7480 (WNT10B)|8792 (TNFRSF11A)|8877 (SPHK1)|9830 (TRIM14)|114548 (NLRP3)|148022 (TICAM1)|150372 (NFAM1)
		M	GO|GO.BP	GO:0046631	alpha-beta T cell activation	1.09672e-08	0.00124982	14	602 (BCL3)|2000 (ELF4)|3077 (HFE)|3566 (IL4R)|3570 (IL6R)|3659 (IRF1)|4860 (PNP)|5788 (PTPRC)|6693 (SPN)|6778 (STAT6)|9308 (CD83)|10148 (EBI3)|54440 (SASH3)|114548 (NLRP3)
		M	GO|GO.BP	GO:0042127	regulation of cell proliferation	1.17193e-08	0.00133553	55	140 (ADORA3)|598 (BCL2L1)|637 (BID)|694 (BTG1)|728 (C5AR1)|923 (CD6)|1050 (CEBPA)|1051 (CEBPB)|1435 (CSF1)|1445 (CSK)|1522 (CTSZ)|2014 (EMP3)|2099 (ESR1)|2242 (FES)|2683 (B4GALT1)|3059 (HCLS1)|3162 (HMOX1)|3566 (IL4R)|3570 (IL6R)|3635 (INPP5D)|3659 (IRF1)|3958 (LGALS3)|4057 (LTF)|4067 (LYN)|4860 (PNP)|5788 (PTPRC)|5880 (RAC2)|5970 (RELA)|6347 (CCL2)|6446 (SGK1)|6503 (SLA)|6665 (SOX15)|6693 (SPN)|…
		M	GO|GO.BP	GO:0043067	regulation of programmed cell death	1.19439e-08	0.00136113	53	598 (BCL2L1)|602 (BCL3)|637 (BID)|694 (BTG1)|728 (C5AR1)|834 (CASP1)|1051 (CEBPB)|1522 (CTSZ)|2099 (ESR1)|2207 (FCER1G)|2683 (B4GALT1)|3059 (HCLS1)|3162 (HMOX1)|3383 (ICAM1)|3635 (INPP5D)|3956 (LGALS1)|3958 (LGALS3)|4057 (LTF)|4067 (LYN)|4353 (MPO)|4615 (MYD88)|4836 (NMT1)|5054 (SERPINE1)|5580 (PRKCD)|5788 (PTPRC)|5970 (RELA)|6279 (S100A8)|6280 (S100A9)|6347 (CCL2)|6446 (SGK1)|7040 (TGFB1)|7046 (…
		M	GO|GO.BP	GO:0097190	apoptotic signaling pathway	1.25234e-08	0.00142717	29	598 (BCL2L1)|602 (BCL3)|637 (BID)|834 (CASP1)|929 (CD14)|1051 (CEBPB)|2872 (MKNK2)|3162 (HMOX1)|3383 (ICAM1)|3570 (IL6R)|3958 (LGALS3)|4836 (NMT1)|5054 (SERPINE1)|5580 (PRKCD)|5788 (PTPRC)|5970 (RELA)|6279 (S100A8)|6280 (S100A9)|7040 (TGFB1)|7046 (TGFBR1)|7128 (TNFAIP3)|7132 (TNFRSF1A)|7133 (TNFRSF1B)|8879 (SGPL1)|9709 (HERPUD1)|25946 (ZNF385A)|26471 (NUPR1)|83982 (IFI27L2)|148022 (TICAM1)
		M	GO|GO.CC	GO:0034774	secretory granule lumen	1.2656e-08	0.00144228	21	718 (C3)|1509 (CTSD)|1522 (CTSZ)|2162 (F13A1)|2268 (FGR)|2799 (GNS)|2896 (GRN)|3101 (HK3)|4057 (LTF)|4353 (MPO)|4860 (PNP)|5054 (SERPINE1)|5199 (CFP)|5580 (PRKCD)|6279 (S100A8)|6280 (S100A9)|7040 (TGFB1)|23406 (COTL1)|79792 (GSDMD)|83706 (FERMT3)|387921 (NHLRC3)
		M	GO|GO.BP	GO:0050866	negative regulation of cell activation	1.39652e-08	0.00159148	16	1051 (CEBPB)|3077 (HFE)|3162 (HMOX1)|3566 (IL4R)|3635 (INPP5D)|3659 (IRF1)|3958 (LGALS3)|4067 (LYN)|5580 (PRKCD)|5788 (PTPRC)|6693 (SPN)|7040 (TGFB1)|7128 (TNFAIP3)|8832 (CD84)|55024 (BANK1)|84959 (UBASH3B)
		M	GO|GO.BP	GO:0002460	adaptive immune response based on somatic recombination of immune receptors built from immunoglobulin superfamily domains	1.43255e-08	0.00163254	22	602 (BCL3)|713 (C1QB)|714 (C1QC)|718 (C3)|2207 (FCER1G)|3077 (HFE)|3383 (ICAM1)|3566 (IL4R)|3570 (IL6R)|3635 (INPP5D)|4791 (NFKB2)|5452 (POU2F2)|5580 (PRKCD)|5788 (PTPRC)|6693 (SPN)|6778 (STAT6)|7040 (TGFB1)|7128 (TNFAIP3)|10148 (EBI3)|51279 (C1RL)|54440 (SASH3)|114548 (NLRP3)
		M	GO|GO.BP	GO:0030316	osteoclast differentiation	1.45157e-08	0.00165421	12	1051 (CEBPB)|1230 (CCR1)|1435 (CSF1)|2207 (FCER1G)|3635 (INPP5D)|4057 (LTF)|7040 (TGFB1)|7305 (TYROBP)|8792 (TNFRSF11A)|22904 (SBNO2)|54209 (TREM2)|84959 (UBASH3B)
		M	GO|GO.CC	GO:0101002	ficolin-1-rich granule	1.50879e-08	0.00171942	16	1471 (CST3)|1509 (CTSD)|1520 (CTSS)|1522 (CTSZ)|2207 (FCER1G)|2357 (FPR1)|2799 (GNS)|3101 (HK3)|3689 (ITGB2)|3958 (LGALS3)|4860 (PNP)|10312 (TCIRG1)|23218 (NBEAL2)|23406 (COTL1)|79792 (GSDMD)|80301 (PLEKHO2)
		M	GO|GO.BP	GO:0032879	regulation of localization	1.87416e-08	0.00213579	76	60 (ACTB)|140 (ADORA3)|154 (ADRB2)|598 (BCL2L1)|637 (BID)|718 (C3)|719 (C3AR1)|728 (C5AR1)|834 (CASP1)|929 (CD14)|1051 (CEBPB)|1230 (CCR1)|1435 (CSF1)|1445 (CSK)|1520 (CTSS)|2207 (FCER1G)|2242 (FES)|2268 (FGR)|3059 (HCLS1)|3077 (HFE)|3099 (HK2)|3162 (HMOX1)|3383 (ICAM1)|3566 (IL4R)|3570 (IL6R)|3689 (ITGB2)|3958 (LGALS3)|4067 (LYN)|4481 (MSR1)|4836 (NMT1)|4939 (OAS2)|5029 (P2RY2)|5054 (SERPINE1)|5…
		M	GO|GO.CC	GO:0030659	cytoplasmic vesicle membrane	2.10987e-08	0.00240441	33	154 (ADRB2)|598 (BCL2L1)|719 (C3AR1)|728 (C5AR1)|929 (CD14)|963 (CD53)|2207 (FCER1G)|2212 (FCGR2A)|2215 (FCGR3B)|2357 (FPR1)|2683 (B4GALT1)|3689 (ITGB2)|3958 (LGALS3)|4481 (MSR1)|5788 (PTPRC)|5880 (RAC2)|6892 (TAPBP)|7096 (TLR1)|7097 (TLR2)|7133 (TNFRSF1B)|7305 (TYROBP)|8673 (VAMP8)|9145 (SYNGR1)|9332 (CD163)|10312 (TCIRG1)|23166 (STAB1)|23218 (NBEAL2)|54918 (CMTM6)|55647 (RAB20)|57153 (SLC44A2)|…
		M	GO|GO.BP	GO:0030595	leukocyte chemotaxis	2.33723e-08	0.00266351	17	719 (C3AR1)|728 (C5AR1)|1230 (CCR1)|1435 (CSF1)|2207 (FCER1G)|3570 (IL6R)|3689 (ITGB2)|3958 (LGALS3)|4067 (LYN)|5054 (SERPINE1)|5880 (RAC2)|6279 (S100A8)|6280 (S100A9)|6347 (CCL2)|8792 (TNFRSF11A)|58191 (CXCL16)|63940 (GPSM3)
		M	GO|GO.BP	GO:0051251	positive regulation of lymphocyte activation	2.39408e-08	0.00272829	21	923 (CD6)|1445 (CSK)|3566 (IL4R)|3570 (IL6R)|3635 (INPP5D)|3956 (LGALS1)|4067 (LYN)|4860 (PNP)|5788 (PTPRC)|6347 (CCL2)|6778 (STAT6)|7040 (TGFB1)|8808 (IL1RL2)|9308 (CD83)|10148 (EBI3)|23308 (ICOSLG)|30835 (CD209)|54440 (SASH3)|79155 (TNIP2)|114548 (NLRP3)|148022 (TICAM1)
		M	GO|GO.BP	GO:0002532	production of molecular mediator involved in inflammatory response	2.52513e-08	0.00287764	10	215 (ABCD1)|923 (CD6)|2207 (FCER1G)|3566 (IL4R)|4067 (LYN)|4615 (MYD88)|5054 (SERPINE1)|8673 (VAMP8)|63940 (GPSM3)|148022 (TICAM1)
		M	GO|GO.CC	GO:0060205	cytoplasmic vesicle lumen	3.09537e-08	0.00352748	21	718 (C3)|1509 (CTSD)|1522 (CTSZ)|2162 (F13A1)|2268 (FGR)|2799 (GNS)|2896 (GRN)|3101 (HK3)|4057 (LTF)|4353 (MPO)|4860 (PNP)|5054 (SERPINE1)|5199 (CFP)|5580 (PRKCD)|6279 (S100A8)|6280 (S100A9)|7040 (TGFB1)|23406 (COTL1)|79792 (GSDMD)|83706 (FERMT3)|387921 (NHLRC3)
		M	GO|GO.BP	GO:0032675	regulation of interleukin-6 production	3.21423e-08	0.00366293	13	1051 (CEBPB)|1445 (CSK)|2207 (FCER1G)|3570 (IL6R)|3635 (INPP5D)|4615 (MYD88)|7096 (TLR1)|7097 (TLR2)|7128 (TNFAIP3)|8808 (IL1RL2)|9261 (MAPKAPK2)|55024 (BANK1)|148022 (TICAM1)
		M	GO|GO.BP	GO:0051247	positive regulation of protein metabolic process	3.22287e-08	0.00367279	54	154 (ADRB2)|602 (BCL3)|637 (BID)|718 (C3)|728 (C5AR1)|834 (CASP1)|1050 (CEBPA)|1230 (CCR1)|1435 (CSF1)|1445 (CSK)|2357 (FPR1)|3059 (HCLS1)|3077 (HFE)|3162 (HMOX1)|3383 (ICAM1)|3570 (IL6R)|3659 (IRF1)|3937 (LCP2)|4057 (LTF)|4067 (LYN)|5045 (FURIN)|5580 (PRKCD)|5606 (MAP2K3)|5788 (PTPRC)|5970 (RELA)|6256 (RXRA)|6279 (S100A8)|6280 (S100A9)|6347 (CCL2)|6693 (SPN)|7040 (TGFB1)|7046 (TGFBR1)|7096 (TLR1…
		M	GO|GO.CC	GO:0031983	vesicle lumen	3.25664e-08	0.00371127	21	718 (C3)|1509 (CTSD)|1522 (CTSZ)|2162 (F13A1)|2268 (FGR)|2799 (GNS)|2896 (GRN)|3101 (HK3)|4057 (LTF)|4353 (MPO)|4860 (PNP)|5054 (SERPINE1)|5199 (CFP)|5580 (PRKCD)|6279 (S100A8)|6280 (S100A9)|7040 (TGFB1)|23406 (COTL1)|79792 (GSDMD)|83706 (FERMT3)|387921 (NHLRC3)
		M	GO|GO.BP	GO:0032418	lysosome localization	3.4467e-08	0.00392786	10	2207 (FCER1G)|2242 (FES)|2268 (FGR)|3162 (HMOX1)|3566 (IL4R)|4067 (LYN)|5880 (RAC2)|7462 (LAT2)|8673 (VAMP8)|8832 (CD84)
		M	GO|GO.BP	GO:0034121	regulation of toll-like receptor signaling pathway	3.4467e-08	0.00392786	10	929 (CD14)|2099 (ESR1)|3659 (IRF1)|4057 (LTF)|4067 (LYN)|7096 (TLR1)|7097 (TLR2)|7100 (TLR5)|7128 (TNFAIP3)|148022 (TICAM1)
		M	GO|GO.CC	GO:0044425	membrane part	3.47584e-08	0.00396107	145	140 (ADORA3)|154 (ADRB2)|215 (ABCD1)|241 (ALOX5AP)|598 (BCL2L1)|637 (BID)|719 (C3AR1)|728 (C5AR1)|923 (CD6)|929 (CD14)|963 (CD53)|1040 (CDS1)|1230 (CCR1)|1435 (CSF1)|1439 (CSF2RB)|1445 (CSK)|1509 (CTSD)|1820 (ARID3A)|2014 (EMP3)|2099 (ESR1)|2207 (FCER1G)|2212 (FCGR2A)|2215 (FCGR3B)|2242 (FES)|2268 (FGR)|2357 (FPR1)|2683 (B4GALT1)|2687 (GGT5)|3077 (HFE)|3162 (HMOX1)|3383 (ICAM1)|3459 (IFNGR1)|3566…
		M	GO|GO.BP	GO:0022409	positive regulation of cell-cell adhesion	3.53354e-08	0.00402682	18	923 (CD6)|1445 (CSK)|3383 (ICAM1)|3566 (IL4R)|3570 (IL6R)|3956 (LGALS1)|4067 (LYN)|4860 (PNP)|5788 (PTPRC)|6347 (CCL2)|7040 (TGFB1)|8808 (IL1RL2)|9308 (CD83)|10148 (EBI3)|23308 (ICOSLG)|30835 (CD209)|54440 (SASH3)|114548 (NLRP3)
		M	GO|GO.CC	GO:0045335	phagocytic vesicle	3.54406e-08	0.00403881	13	752 (FMNL1)|3693 (ITGB5)|4057 (LTF)|4688 (NCF2)|4689 (NCF4)|5880 (RAC2)|6892 (TAPBP)|7096 (TLR1)|7097 (TLR2)|8673 (VAMP8)|10312 (TCIRG1)|55647 (RAB20)|81622 (UNC93B1)
		M	GO|GO.BP	GO:0007275	multicellular organism development	3.62564e-08	0.00413178	121	60 (ACTB)|154 (ADRB2)|215 (ABCD1)|463 (ZFHX3)|598 (BCL2L1)|602 (BCL3)|694 (BTG1)|713 (C1QB)|714 (C1QC)|718 (C3)|719 (C3AR1)|728 (C5AR1)|1050 (CEBPA)|1051 (CEBPB)|1230 (CCR1)|1293 (COL6A3)|1435 (CSF1)|1445 (CSK)|1522 (CTSZ)|1777 (DNASE2)|1796 (DOK1)|2099 (ESR1)|2207 (FCER1G)|2242 (FES)|2683 (B4GALT1)|2872 (MKNK2)|3059 (HCLS1)|3077 (HFE)|3099 (HK2)|3162 (HMOX1)|3383 (ICAM1)|3566 (IL4R)|3570 (IL6R)|…
		M	GO|GO.BP	GO:0009611	response to wounding	3.78584e-08	0.00431434	30	60 (ACTB)|140 (ADORA3)|1230 (CCR1)|2162 (F13A1)|2207 (FCER1G)|2683 (B4GALT1)|3162 (HMOX1)|3659 (IRF1)|3937 (LCP2)|3956 (LGALS1)|4067 (LYN)|4548 (MTR)|4814 (NINJ1)|5054 (SERPINE1)|5341 (PLEK)|5580 (PRKCD)|6279 (S100A8)|6665 (SOX15)|6696 (SPP1)|7040 (TGFB1)|7046 (TGFBR1)|7094 (TLN1)|7128 (TNFAIP3)|7480 (WNT10B)|7538 (ZFP36)|8527 (DGKD)|10894 (LYVE1)|23533 (PIK3R5)|83706 (FERMT3)|84959 (UBASH3B)
		M	GO|GO.BP	GO:0006909	phagocytosis	3.78826e-08	0.0043171	21	60 (ACTB)|718 (C3)|929 (CD14)|1445 (CSK)|2207 (FCER1G)|2212 (FCGR2A)|2268 (FGR)|3689 (ITGB2)|4067 (LYN)|4481 (MSR1)|4688 (NCF2)|4689 (NCF4)|5580 (PRKCD)|5788 (PTPRC)|6347 (CCL2)|7040 (TGFB1)|7052 (TGM2)|7097 (TLR2)|10163 (WASF2)|54209 (TREM2)|55647 (RAB20)
		M	GO|GO.CC	GO:0012506	vesicle membrane	4.05893e-08	0.00462556	33	154 (ADRB2)|598 (BCL2L1)|719 (C3AR1)|728 (C5AR1)|929 (CD14)|963 (CD53)|2207 (FCER1G)|2212 (FCGR2A)|2215 (FCGR3B)|2357 (FPR1)|2683 (B4GALT1)|3689 (ITGB2)|3958 (LGALS3)|4481 (MSR1)|5788 (PTPRC)|5880 (RAC2)|6892 (TAPBP)|7096 (TLR1)|7097 (TLR2)|7133 (TNFRSF1B)|7305 (TYROBP)|8673 (VAMP8)|9145 (SYNGR1)|9332 (CD163)|10312 (TCIRG1)|23166 (STAB1)|23218 (NBEAL2)|54918 (CMTM6)|55647 (RAB20)|57153 (SLC44A2)|…
		M	GO|GO.BP	GO:0030098	lymphocyte differentiation	4.18605e-08	0.00477043	21	602 (BCL3)|2207 (FCER1G)|3566 (IL4R)|3635 (INPP5D)|3659 (IRF1)|3955 (LFNG)|3956 (LGALS1)|4860 (PNP)|5452 (POU2F2)|5788 (PTPRC)|6693 (SPN)|6778 (STAT6)|7040 (TGFB1)|8808 (IL1RL2)|9308 (CD83)|10320 (IKZF1)|23228 (PLCL2)|54440 (SASH3)|112616 (CMTM7)|114548 (NLRP3)|150372 (NFAM1)
		M	GO|GO.BP	GO:0050900	leukocyte migration	4.45632e-08	0.00507843	25	719 (C3AR1)|728 (C5AR1)|1230 (CCR1)|1435 (CSF1)|2207 (FCER1G)|2683 (B4GALT1)|3162 (HMOX1)|3383 (ICAM1)|3570 (IL6R)|3635 (INPP5D)|3689 (ITGB2)|3958 (LGALS3)|4067 (LYN)|5054 (SERPINE1)|5880 (RAC2)|6279 (S100A8)|6280 (S100A9)|6347 (CCL2)|6693 (SPN)|7040 (TGFB1)|8792 (TNFRSF11A)|8832 (CD84)|9056 (SLC7A7)|58191 (CXCL16)|63940 (GPSM3)
		M	GO|GO.BP	GO:0071674	mononuclear cell migration	4.53014e-08	0.00516255	11	719 (C3AR1)|728 (C5AR1)|1230 (CCR1)|1435 (CSF1)|3570 (IL6R)|3958 (LGALS3)|4067 (LYN)|5054 (SERPINE1)|6347 (CCL2)|7040 (TGFB1)|8792 (TNFRSF11A)
		M	GO|GO.BP	GO:0032680	regulation of tumor necrosis factor production	4.72458e-08	0.00538413	13	602 (BCL3)|929 (CD14)|2207 (FCER1G)|4057 (LTF)|5788 (PTPRC)|6693 (SPN)|7096 (TLR1)|7097 (TLR2)|7128 (TNFAIP3)|7538 (ZFP36)|9261 (MAPKAPK2)|54440 (SASH3)|148022 (TICAM1)
		M	GO|GO.BP	GO:1901564	organonitrogen compound metabolic process	4.76655e-08	0.00543196	146	60 (ACTB)|154 (ADRB2)|215 (ABCD1)|602 (BCL3)|637 (BID)|713 (C1QB)|714 (C1QC)|718 (C3)|719 (C3AR1)|728 (C5AR1)|834 (CASP1)|1040 (CDS1)|1050 (CEBPA)|1051 (CEBPB)|1230 (CCR1)|1293 (COL6A3)|1435 (CSF1)|1439 (CSF2RB)|1445 (CSK)|1471 (CST3)|1509 (CTSD)|1520 (CTSS)|1522 (CTSZ)|2099 (ESR1)|2162 (F13A1)|2242 (FES)|2268 (FGR)|2289 (FKBP5)|2357 (FPR1)|2683 (B4GALT1)|2687 (GGT5)|2799 (GNS)|2872 (MKNK2)|3017 …
		M	GO|GO.CC	GO:0009986	cell surface	4.97759e-08	0.00567247	35	728 (C5AR1)|923 (CD6)|929 (CD14)|1230 (CCR1)|1522 (CTSZ)|2207 (FCER1G)|2683 (B4GALT1)|3077 (HFE)|3383 (ICAM1)|3570 (IL6R)|3682 (ITGAE)|3689 (ITGB2)|3693 (ITGB5)|3956 (LGALS1)|3958 (LGALS3)|4057 (LTF)|5045 (FURIN)|5788 (PTPRC)|6693 (SPN)|7040 (TGFB1)|7046 (TGFBR1)|7094 (TLN1)|7097 (TLR2)|7132 (TNFRSF1A)|7305 (TYROBP)|8792 (TNFRSF11A)|9308 (CD83)|9332 (CD163)|10148 (EBI3)|23308 (ICOSLG)|23654 (PLXN…
		M	GO|GO.BP	GO:0030198	extracellular matrix organization	5.09983e-08	0.00581177	21	602 (BCL3)|1293 (COL6A3)|1471 (CST3)|1520 (CTSS)|2683 (B4GALT1)|3383 (ICAM1)|3682 (ITGAE)|3689 (ITGB2)|3693 (ITGB5)|4791 (NFKB2)|5045 (FURIN)|5054 (SERPINE1)|5351 (PLOD1)|6696 (SPP1)|7040 (TGFB1)|7045 (TGFBI)|7046 (TGFBR1)|7132 (TNFRSF1A)|7133 (TNFRSF1B)|8985 (PLOD3)|85301 (COL27A1)
		M	GO|GO.BP	GO:0008283	cell proliferation	5.23465e-08	0.00596541	62	140 (ADORA3)|598 (BCL2L1)|637 (BID)|694 (BTG1)|728 (C5AR1)|923 (CD6)|1050 (CEBPA)|1051 (CEBPB)|1435 (CSF1)|1445 (CSK)|1522 (CTSZ)|2000 (ELF4)|2014 (EMP3)|2099 (ESR1)|2242 (FES)|2683 (B4GALT1)|3059 (HCLS1)|3162 (HMOX1)|3566 (IL4R)|3570 (IL6R)|3635 (INPP5D)|3659 (IRF1)|3958 (LGALS3)|4057 (LTF)|4067 (LYN)|4860 (PNP)|5045 (FURIN)|5580 (PRKCD)|5788 (PTPRC)|5880 (RAC2)|5970 (RELA)|6256 (RXRA)|6347 (CCL…
		M	GO|GO.BP	GO:0010941	regulation of cell death	5.36837e-08	0.0061178	54	598 (BCL2L1)|602 (BCL3)|637 (BID)|694 (BTG1)|728 (C5AR1)|834 (CASP1)|1051 (CEBPB)|1522 (CTSZ)|2099 (ESR1)|2207 (FCER1G)|2683 (B4GALT1)|3059 (HCLS1)|3162 (HMOX1)|3383 (ICAM1)|3635 (INPP5D)|3689 (ITGB2)|3956 (LGALS1)|3958 (LGALS3)|4057 (LTF)|4067 (LYN)|4353 (MPO)|4615 (MYD88)|4836 (NMT1)|5054 (SERPINE1)|5580 (PRKCD)|5788 (PTPRC)|5970 (RELA)|6279 (S100A8)|6280 (S100A9)|6347 (CCL2)|6446 (SGK1)|7040 (…
		M	GO|GO.BP	GO:0007249	I-kappaB kinase/NF-kappaB signaling	5.38005e-08	0.00613111	18	602 (BCL3)|834 (CASP1)|929 (CD14)|2099 (ESR1)|3162 (HMOX1)|3956 (LGALS1)|4057 (LTF)|4615 (MYD88)|5970 (RELA)|7052 (TGM2)|7097 (TLR2)|7128 (TNFAIP3)|7132 (TNFRSF1A)|9020 (MAP3K14)|10783 (NEK6)|57153 (SLC44A2)|79155 (TNIP2)|148022 (TICAM1)
		M	GO|GO.BP	GO:0032640	tumor necrosis factor production	5.69719e-08	0.00649251	13	602 (BCL3)|929 (CD14)|2207 (FCER1G)|4057 (LTF)|5788 (PTPRC)|6693 (SPN)|7096 (TLR1)|7097 (TLR2)|7128 (TNFAIP3)|7538 (ZFP36)|9261 (MAPKAPK2)|54440 (SASH3)|148022 (TICAM1)
		M	GO|GO.BP	GO:0042129	regulation of T cell proliferation	5.9891e-08	0.00682518	14	923 (CD6)|1051 (CEBPB)|3570 (IL6R)|3659 (IRF1)|3958 (LGALS3)|4860 (PNP)|5788 (PTPRC)|5880 (RAC2)|6693 (SPN)|7040 (TGFB1)|10148 (EBI3)|23308 (ICOSLG)|30835 (CD209)|54440 (SASH3)
		M	GO|GO.BP	GO:0042098	T cell proliferation	6.05475e-08	0.00689999	15	923 (CD6)|1051 (CEBPB)|2000 (ELF4)|3570 (IL6R)|3659 (IRF1)|3958 (LGALS3)|4860 (PNP)|5788 (PTPRC)|5880 (RAC2)|6693 (SPN)|7040 (TGFB1)|10148 (EBI3)|23308 (ICOSLG)|30835 (CD209)|54440 (SASH3)
		M	GO|GO.BP	GO:1903706	regulation of hemopoiesis	6.31977e-08	0.007202	23	714 (C1QC)|1051 (CEBPB)|1230 (CCR1)|1435 (CSF1)|2242 (FES)|3059 (HCLS1)|3566 (IL4R)|3635 (INPP5D)|3659 (IRF1)|3958 (LGALS3)|4057 (LTF)|4067 (LYN)|4860 (PNP)|5788 (PTPRC)|7040 (TGFB1)|7305 (TYROBP)|7538 (ZFP36)|8808 (IL1RL2)|9308 (CD83)|54440 (SASH3)|84959 (UBASH3B)|114548 (NLRP3)|150372 (NFAM1)
		M	GO|GO.BP	GO:0034134	toll-like receptor 2 signaling pathway	6.65896e-08	0.00758855	6	4067 (LYN)|7096 (TLR1)|7097 (TLR2)|7128 (TNFAIP3)|79155 (TNIP2)|118788 (PIK3AP1)
		M	GO|GO.BP	GO:0002705	positive regulation of leukocyte mediated immunity	6.84639e-08	0.00780215	13	718 (C3)|2207 (FCER1G)|2268 (FGR)|3077 (HFE)|3566 (IL4R)|3689 (ITGB2)|5788 (PTPRC)|6778 (STAT6)|7040 (TGFB1)|8673 (VAMP8)|54440 (SASH3)|114548 (NLRP3)|148022 (TICAM1)
		M	GO|GO.BP	GO:1903555	regulation of tumor necrosis factor superfamily cytokine production	6.84639e-08	0.00780215	13	602 (BCL3)|929 (CD14)|2207 (FCER1G)|4057 (LTF)|5788 (PTPRC)|6693 (SPN)|7096 (TLR1)|7097 (TLR2)|7128 (TNFAIP3)|7538 (ZFP36)|9261 (MAPKAPK2)|54440 (SASH3)|148022 (TICAM1)
		M	GO|GO.BP	GO:0002685	regulation of leukocyte migration	7.02269e-08	0.00800306	15	719 (C3AR1)|728 (C5AR1)|1230 (CCR1)|1435 (CSF1)|3162 (HMOX1)|3383 (ICAM1)|3570 (IL6R)|3958 (LGALS3)|4067 (LYN)|5054 (SERPINE1)|5880 (RAC2)|6347 (CCL2)|6693 (SPN)|7040 (TGFB1)|63940 (GPSM3)
		M	GO|GO.CC	GO:0005766	primary lysosome	7.05498e-08	0.00803986	14	718 (C3)|719 (C3AR1)|2357 (FPR1)|2683 (B4GALT1)|2799 (GNS)|2896 (GRN)|3073 (HEXA)|4353 (MPO)|5580 (PRKCD)|8673 (VAMP8)|9145 (SYNGR1)|54918 (CMTM6)|150372 (NFAM1)|387921 (NHLRC3)
		M	GO|GO.CC	GO:0042582	azurophil granule	7.05498e-08	0.00803986	14	718 (C3)|719 (C3AR1)|2357 (FPR1)|2683 (B4GALT1)|2799 (GNS)|2896 (GRN)|3073 (HEXA)|4353 (MPO)|5580 (PRKCD)|8673 (VAMP8)|9145 (SYNGR1)|54918 (CMTM6)|150372 (NFAM1)|387921 (NHLRC3)
		M	GO|GO.BP	GO:0051094	positive regulation of developmental process	7.23567e-08	0.00824577	47	154 (ADRB2)|694 (BTG1)|718 (C3)|719 (C3AR1)|728 (C5AR1)|963 (CD53)|1050 (CEBPA)|1051 (CEBPB)|1230 (CCR1)|1435 (CSF1)|2242 (FES)|3059 (HCLS1)|3099 (HK2)|3162 (HMOX1)|3566 (IL4R)|3570 (IL6R)|3635 (INPP5D)|3689 (ITGB2)|4057 (LTF)|4067 (LYN)|4481 (MSR1)|4860 (PNP)|5054 (SERPINE1)|5788 (PTPRC)|5970 (RELA)|6280 (S100A9)|6665 (SOX15)|6778 (STAT6)|7040 (TGFB1)|7046 (TGFBR1)|7097 (TLR2)|7128 (TNFAIP3)|713…
		M	GO|GO.BP	GO:0032635	interleukin-6 production	7.49577e-08	0.00854218	13	1051 (CEBPB)|1445 (CSK)|2207 (FCER1G)|3570 (IL6R)|3635 (INPP5D)|4615 (MYD88)|7096 (TLR1)|7097 (TLR2)|7128 (TNFAIP3)|8808 (IL1RL2)|9261 (MAPKAPK2)|55024 (BANK1)|148022 (TICAM1)
		M	GO|GO.BP	GO:0065007	biological regulation	8.9354e-08	0.0101828	227	60 (ACTB)|140 (ADORA3)|154 (ADRB2)|215 (ABCD1)|241 (ALOX5AP)|463 (ZFHX3)|598 (BCL2L1)|602 (BCL3)|637 (BID)|694 (BTG1)|713 (C1QB)|714 (C1QC)|718 (C3)|719 (C3AR1)|728 (C5AR1)|752 (FMNL1)|834 (CASP1)|923 (CD6)|929 (CD14)|963 (CD53)|1040 (CDS1)|1050 (CEBPA)|1051 (CEBPB)|1230 (CCR1)|1293 (COL6A3)|1435 (CSF1)|1439 (CSF2RB)|1445 (CSK)|1471 (CST3)|1520 (CTSS)|1522 (CTSZ)|1777 (DNASE2)|1796 (DOK1)|1820 (A…
		M	GO|GO.CC	GO:0031226	intrinsic component of plasma membrane	9.49714e-08	0.0108229	53	140 (ADORA3)|154 (ADRB2)|719 (C3AR1)|728 (C5AR1)|923 (CD6)|929 (CD14)|963 (CD53)|1230 (CCR1)|1439 (CSF2RB)|2207 (FCER1G)|2687 (GGT5)|3077 (HFE)|3383 (ICAM1)|3459 (IFNGR1)|3566 (IL4R)|3570 (IL6R)|3682 (ITGAE)|3689 (ITGB2)|3693 (ITGB5)|4067 (LYN)|4481 (MSR1)|4688 (NCF2)|4689 (NCF4)|5029 (P2RY2)|5788 (PTPRC)|6693 (SPN)|6768 (ST14)|7046 (TGFBR1)|7052 (TGM2)|7096 (TLR1)|7097 (TLR2)|7107 (GPR137B)|7132…
		M	GO|GO.BP	GO:0071706	tumor necrosis factor superfamily cytokine production	9.78958e-08	0.0111562	13	602 (BCL3)|929 (CD14)|2207 (FCER1G)|4057 (LTF)|5788 (PTPRC)|6693 (SPN)|7096 (TLR1)|7097 (TLR2)|7128 (TNFAIP3)|7538 (ZFP36)|9261 (MAPKAPK2)|54440 (SASH3)|148022 (TICAM1)
		M	GO|GO.CC	GO:0042581	specific granule	1.0509e-07	0.0119761	14	719 (C3AR1)|963 (CD53)|1509 (CTSD)|1522 (CTSZ)|3689 (ITGB2)|4057 (LTF)|5199 (CFP)|7133 (TNFRSF1B)|8673 (VAMP8)|54918 (CMTM6)|57153 (SLC44A2)|79792 (GSDMD)|81619 (TSPAN14)|84329 (HVCN1)
		M	GO|GO.BP	GO:0019538	protein metabolic process	1.08569e-07	0.0123725	128	60 (ACTB)|154 (ADRB2)|602 (BCL3)|637 (BID)|713 (C1QB)|714 (C1QC)|718 (C3)|719 (C3AR1)|728 (C5AR1)|834 (CASP1)|1050 (CEBPA)|1051 (CEBPB)|1230 (CCR1)|1293 (COL6A3)|1435 (CSF1)|1439 (CSF2RB)|1445 (CSK)|1471 (CST3)|1509 (CTSD)|1520 (CTSS)|1522 (CTSZ)|2099 (ESR1)|2162 (F13A1)|2242 (FES)|2268 (FGR)|2289 (FKBP5)|2357 (FPR1)|2683 (B4GALT1)|2687 (GGT5)|2872 (MKNK2)|3017 (HIST1H2BD)|3059 (HCLS1)|3073 (HEXA…
		M	GO|GO.BP	GO:0045785	positive regulation of cell adhesion	1.09059e-07	0.0124283	22	463 (ZFHX3)|923 (CD6)|1435 (CSF1)|1445 (CSK)|3383 (ICAM1)|3566 (IL4R)|3570 (IL6R)|3956 (LGALS1)|4067 (LYN)|4814 (NINJ1)|4860 (PNP)|5788 (PTPRC)|6347 (CCL2)|7040 (TGFB1)|7052 (TGM2)|8808 (IL1RL2)|9308 (CD83)|10148 (EBI3)|23308 (ICOSLG)|30835 (CD209)|54440 (SASH3)|114548 (NLRP3)
		M	GO|GO.BP	GO:0031663	lipopolysaccharide-mediated signaling pathway	1.14275e-07	0.0130228	9	923 (CD6)|929 (CD14)|4057 (LTF)|4067 (LYN)|6347 (CCL2)|7040 (TGFB1)|7097 (TLR2)|7128 (TNFAIP3)|148022 (TICAM1)
		M	GO|GO.BP	GO:0002888	positive regulation of myeloid leukocyte mediated immunity	1.22865e-07	0.0140017	7	718 (C3)|2207 (FCER1G)|2268 (FGR)|3566 (IL4R)|3689 (ITGB2)|8673 (VAMP8)|148022 (TICAM1)
		M	GO|GO.BP	GO:0032501	multicellular organismal process	1.25998e-07	0.0143588	154	60 (ACTB)|140 (ADORA3)|154 (ADRB2)|215 (ABCD1)|463 (ZFHX3)|598 (BCL2L1)|602 (BCL3)|694 (BTG1)|713 (C1QB)|714 (C1QC)|718 (C3)|719 (C3AR1)|728 (C5AR1)|834 (CASP1)|923 (CD6)|929 (CD14)|1050 (CEBPA)|1051 (CEBPB)|1230 (CCR1)|1293 (COL6A3)|1435 (CSF1)|1439 (CSF2RB)|1445 (CSK)|1471 (CST3)|1522 (CTSZ)|1777 (DNASE2)|1796 (DOK1)|2099 (ESR1)|2162 (F13A1)|2207 (FCER1G)|2242 (FES)|2268 (FGR)|2683 (B4GALT1)|28…
		M	GO|GO.BP	GO:0043062	extracellular structure organization	1.35496e-07	0.0154412	22	602 (BCL3)|1293 (COL6A3)|1471 (CST3)|1520 (CTSS)|2683 (B4GALT1)|3383 (ICAM1)|3682 (ITGAE)|3689 (ITGB2)|3693 (ITGB5)|4353 (MPO)|4791 (NFKB2)|5045 (FURIN)|5054 (SERPINE1)|5351 (PLOD1)|6696 (SPP1)|7040 (TGFB1)|7045 (TGFBI)|7046 (TGFBR1)|7132 (TNFRSF1A)|7133 (TNFRSF1B)|8985 (PLOD3)|85301 (COL27A1)
		M	GO|GO.BP	GO:0032268	regulation of cellular protein metabolic process	1.404e-07	0.016	71	60 (ACTB)|154 (ADRB2)|602 (BCL3)|637 (BID)|718 (C3)|728 (C5AR1)|834 (CASP1)|1050 (CEBPA)|1230 (CCR1)|1293 (COL6A3)|1435 (CSF1)|1445 (CSK)|1471 (CST3)|1522 (CTSZ)|2268 (FGR)|2357 (FPR1)|2872 (MKNK2)|3059 (HCLS1)|3077 (HFE)|3383 (ICAM1)|3570 (IL6R)|3689 (ITGB2)|3937 (LCP2)|3958 (LGALS3)|4057 (LTF)|4067 (LYN)|5045 (FURIN)|5054 (SERPINE1)|5580 (PRKCD)|5606 (MAP2K3)|5788 (PTPRC)|5880 (RAC2)|5970 (RELA…
		M	GO|GO.BP	GO:0002695	negative regulation of leukocyte activation	1.43002e-07	0.0162965	14	1051 (CEBPB)|3077 (HFE)|3162 (HMOX1)|3566 (IL4R)|3635 (INPP5D)|3659 (IRF1)|3958 (LGALS3)|4067 (LYN)|5788 (PTPRC)|6693 (SPN)|7040 (TGFB1)|7128 (TNFAIP3)|8832 (CD84)|55024 (BANK1)
		M	GO|GO.BP	GO:0071675	regulation of mononuclear cell migration	1.48078e-07	0.016875	8	719 (C3AR1)|728 (C5AR1)|1230 (CCR1)|1435 (CSF1)|3958 (LGALS3)|4067 (LYN)|5054 (SERPINE1)|7040 (TGFB1)
		M	GO|GO.BP	GO:0033993	response to lipid	1.84863e-07	0.021067	35	728 (C5AR1)|834 (CASP1)|923 (CD6)|929 (CD14)|1051 (CEBPB)|1439 (CSF2RB)|2099 (ESR1)|3383 (ICAM1)|4057 (LTF)|4067 (LYN)|4353 (MPO)|4791 (NFKB2)|5054 (SERPINE1)|5970 (RELA)|6256 (RXRA)|6279 (S100A8)|6347 (CCL2)|6696 (SPP1)|7040 (TGFB1)|7046 (TGFBR1)|7097 (TLR2)|7128 (TNFAIP3)|7133 (TNFRSF1B)|7480 (WNT10B)|7538 (ZFP36)|7867 (MAPKAPK3)|8792 (TNFRSF11A)|9261 (MAPKAPK2)|10628 (TXNIP)|11344 (TWF2)|22904…
		M	GO|GO.BP	GO:0002687	positive regulation of leukocyte migration	2.21533e-07	0.0252459	12	719 (C3AR1)|728 (C5AR1)|1230 (CCR1)|1435 (CSF1)|3383 (ICAM1)|3570 (IL6R)|3958 (LGALS3)|5054 (SERPINE1)|5880 (RAC2)|6693 (SPN)|7040 (TGFB1)|63940 (GPSM3)
		M	GO|GO.BP	GO:0002429	immune response-activating cell surface receptor signaling pathway	2.24842e-07	0.025623	22	60 (ACTB)|719 (C3AR1)|728 (C5AR1)|1445 (CSK)|2207 (FCER1G)|2212 (FCGR2A)|2268 (FGR)|2357 (FPR1)|3635 (INPP5D)|3937 (LCP2)|3958 (LGALS3)|4067 (LYN)|5580 (PRKCD)|5788 (PTPRC)|5970 (RELA)|7462 (LAT2)|10163 (WASF2)|23228 (PLCL2)|23308 (ICOSLG)|30835 (CD209)|114625 (ERMAP)|150372 (NFAM1)
		M	GO|GO.BP	GO:1901701	cellular response to oxygen-containing compound	2.50221e-07	0.0285152	39	60 (ACTB)|154 (ADRB2)|598 (BCL2L1)|834 (CASP1)|923 (CD6)|929 (CD14)|1051 (CEBPB)|1445 (CSK)|2099 (ESR1)|3383 (ICAM1)|3956 (LGALS1)|4057 (LTF)|4067 (LYN)|4353 (MPO)|4548 (MTR)|5029 (P2RY2)|5054 (SERPINE1)|5140 (PDE3B)|5580 (PRKCD)|5829 (PXN)|5970 (RELA)|6347 (CCL2)|6696 (SPP1)|6778 (STAT6)|7040 (TGFB1)|7097 (TLR2)|7128 (TNFAIP3)|7133 (TNFRSF1B)|7480 (WNT10B)|7538 (ZFP36)|9021 (SOCS3)|10312 (TCIRG1…
		M	GO|GO.BP	GO:0001818	negative regulation of cytokine production	2.56974e-07	0.0292848	17	215 (ABCD1)|602 (BCL3)|1445 (CSK)|3077 (HFE)|3162 (HMOX1)|3635 (INPP5D)|4057 (LTF)|5045 (FURIN)|5788 (PTPRC)|7040 (TGFB1)|7128 (TNFAIP3)|7538 (ZFP36)|8832 (CD84)|9308 (CD83)|55024 (BANK1)|63906 (GPATCH3)|114548 (NLRP3)
		M	GO|GO.BP	GO:0042116	macrophage activation	2.61216e-07	0.0297681	10	1050 (CEBPA)|3566 (IL4R)|3689 (ITGB2)|5788 (PTPRC)|7096 (TLR1)|7097 (TLR2)|7305 (TYROBP)|22904 (SBNO2)|79155 (TNIP2)|148022 (TICAM1)
		M	GO|GO.BP	GO:0097529	myeloid leukocyte migration	2.61535e-07	0.0298046	15	719 (C3AR1)|728 (C5AR1)|1230 (CCR1)|1435 (CSF1)|2207 (FCER1G)|3570 (IL6R)|3689 (ITGB2)|3958 (LGALS3)|4067 (LYN)|5054 (SERPINE1)|5880 (RAC2)|6279 (S100A8)|6280 (S100A9)|6347 (CCL2)|8792 (TNFRSF11A)
		M	GO|GO.MF	GO:0035325	Toll-like receptor binding	2.80643e-07	0.0319821	5	6279 (S100A8)|6280 (S100A9)|7096 (TLR1)|7097 (TLR2)|81622 (UNC93B1)
		M	GO|GO.BP	GO:0050789	regulation of biological process	3.28873e-07	0.0374784	216	60 (ACTB)|140 (ADORA3)|154 (ADRB2)|215 (ABCD1)|463 (ZFHX3)|598 (BCL2L1)|602 (BCL3)|637 (BID)|694 (BTG1)|713 (C1QB)|714 (C1QC)|718 (C3)|719 (C3AR1)|728 (C5AR1)|752 (FMNL1)|834 (CASP1)|923 (CD6)|929 (CD14)|963 (CD53)|1040 (CDS1)|1050 (CEBPA)|1051 (CEBPB)|1230 (CCR1)|1293 (COL6A3)|1435 (CSF1)|1439 (CSF2RB)|1445 (CSK)|1471 (CST3)|1520 (CTSS)|1522 (CTSZ)|1796 (DOK1)|1820 (ARID3A)|2000 (ELF4)|2014 (EMP…
		M	GO|GO.CC	GO:0005887	integral component of plasma membrane	3.32816e-07	0.0379277	50	140 (ADORA3)|154 (ADRB2)|719 (C3AR1)|728 (C5AR1)|923 (CD6)|963 (CD53)|1230 (CCR1)|1439 (CSF2RB)|2207 (FCER1G)|3077 (HFE)|3383 (ICAM1)|3459 (IFNGR1)|3566 (IL4R)|3570 (IL6R)|3682 (ITGAE)|3689 (ITGB2)|3693 (ITGB5)|4067 (LYN)|4481 (MSR1)|4688 (NCF2)|4689 (NCF4)|5029 (P2RY2)|5788 (PTPRC)|6693 (SPN)|6768 (ST14)|7046 (TGFBR1)|7096 (TLR1)|7097 (TLR2)|7107 (GPR137B)|7132 (TNFRSF1A)|7305 (TYROBP)|8808 (IL1…
		M	GO|GO.BP	GO:0051049	regulation of transport	3.32881e-07	0.0379351	54	60 (ACTB)|154 (ADRB2)|637 (BID)|718 (C3)|834 (CASP1)|929 (CD14)|1051 (CEBPB)|1230 (CCR1)|1445 (CSK)|1520 (CTSS)|2207 (FCER1G)|2242 (FES)|2268 (FGR)|3059 (HCLS1)|3077 (HFE)|3099 (HK2)|3162 (HMOX1)|3383 (ICAM1)|3566 (IL4R)|3689 (ITGB2)|3958 (LGALS3)|4067 (LYN)|4836 (NMT1)|4939 (OAS2)|5029 (P2RY2)|5054 (SERPINE1)|5580 (PRKCD)|5788 (PTPRC)|5880 (RAC2)|6236 (RRAD)|6279 (S100A8)|6347 (CCL2)|6446 (SGK1)…
		M	GO|GO.MF	GO:0019899	enzyme binding	3.66866e-07	0.041808	63	60 (ACTB)|154 (ADRB2)|215 (ABCD1)|463 (ZFHX3)|598 (BCL2L1)|637 (BID)|694 (BTG1)|752 (FMNL1)|834 (CASP1)|1050 (CEBPA)|1051 (CEBPB)|1439 (CSF2RB)|1445 (CSK)|1471 (CST3)|2099 (ESR1)|2268 (FGR)|3059 (HCLS1)|3162 (HMOX1)|3570 (IL6R)|3689 (ITGB2)|3958 (LGALS3)|4067 (LYN)|4688 (NCF2)|5045 (FURIN)|5054 (SERPINE1)|5140 (PDE3B)|5341 (PLEK)|5580 (PRKCD)|5606 (MAP2K3)|5788 (PTPRC)|5829 (PXN)|5866 (RAB3IL1)|5…
		M	GO|GO.BP	GO:0060326	cell chemotaxis	3.98903e-07	0.045459	18	719 (C3AR1)|728 (C5AR1)|1230 (CCR1)|1435 (CSF1)|2207 (FCER1G)|3570 (IL6R)|3689 (ITGB2)|3958 (LGALS3)|4067 (LYN)|5054 (SERPINE1)|5580 (PRKCD)|5880 (RAC2)|6279 (S100A8)|6280 (S100A9)|6347 (CCL2)|8792 (TNFRSF11A)|58191 (CXCL16)|63940 (GPSM3)
		N	GO|GO.CC	GO:0097458	neuron part	2.98184e-34	3.3981e-29	103	107 (ADCY1)|116 (ADCYAP1)|478 (ATP1A3)|773 (CACNA1A)|774 (CACNA1B)|793 (CALB1)|1006 (CDH8)|1131 (CHRM3)|1141 (CHRNB2)|1268 (CNR1)|1392 (CRH)|1393 (CRHBP)|1395 (CRHR2)|1641 (DCX)|1759 (DNM1)|1813 (DRD2)|2048 (EPHB2)|2566 (GABRG2)|2571 (GAD1)|2572 (GAD2)|2596 (GAP43)|2742 (GLRA2)|2796 (GNRH1)|2903 (GRIN2A)|2904 (GRIN2B)|2906 (GRIN2D)|3084 (NRG1)|3623 (INHA)|3645 (INSRR)|3747 (KCNC2)|3756 (KCNH1)|38…
		N	GO|GO.CC	GO:0045202	synapse	1.11838e-30	1.27451e-25	81	107 (ADCY1)|116 (ADCYAP1)|478 (ATP1A3)|774 (CACNA1B)|793 (CALB1)|1006 (CDH8)|1131 (CHRM3)|1141 (CHRNB2)|1268 (CNR1)|1393 (CRHBP)|1395 (CRHR2)|1759 (DNM1)|1813 (DRD2)|2048 (EPHB2)|2566 (GABRG2)|2571 (GAD1)|2572 (GAD2)|2596 (GAP43)|2742 (GLRA2)|2796 (GNRH1)|2903 (GRIN2A)|2904 (GRIN2B)|2906 (GRIN2D)|3084 (NRG1)|3747 (KCNC2)|3756 (KCNH1)|3800 (KIF5C)|4923 (NTSR1)|4988 (OPRM1)|5063 (PAK3)|5179 (PENK)|…
		N	GO|GO.CC	GO:0098793	presynapse	4.25111e-30	4.84457e-25	54	116 (ADCYAP1)|774 (CACNA1B)|793 (CALB1)|1006 (CDH8)|1131 (CHRM3)|1141 (CHRNB2)|1268 (CNR1)|1393 (CRHBP)|1395 (CRHR2)|1759 (DNM1)|1813 (DRD2)|2048 (EPHB2)|2571 (GAD1)|2572 (GAD2)|2796 (GNRH1)|2903 (GRIN2A)|3747 (KCNC2)|3756 (KCNH1)|4923 (NTSR1)|4988 (OPRM1)|5179 (PENK)|5864 (RAB3A)|5865 (RAB3B)|6616 (SNAP25)|6812 (STXBP1)|6833 (ABCC8)|6855 (SYP)|6857 (SYT1)|6861 (SYT5)|7532 (YWHAG)|8224 (SYN3)|844…
		N	GO|GO.CC	GO:0044456	synapse part	2.97445e-29	3.38968e-24	71	107 (ADCY1)|116 (ADCYAP1)|774 (CACNA1B)|793 (CALB1)|1006 (CDH8)|1131 (CHRM3)|1141 (CHRNB2)|1268 (CNR1)|1393 (CRHBP)|1395 (CRHR2)|1759 (DNM1)|1813 (DRD2)|2048 (EPHB2)|2566 (GABRG2)|2571 (GAD1)|2572 (GAD2)|2596 (GAP43)|2742 (GLRA2)|2796 (GNRH1)|2903 (GRIN2A)|2904 (GRIN2B)|2906 (GRIN2D)|3747 (KCNC2)|3756 (KCNH1)|4923 (NTSR1)|4988 (OPRM1)|5063 (PAK3)|5179 (PENK)|5864 (RAB3A)|5865 (RAB3B)|6616 (SNAP25…
		N	GO|GO.BP	GO:0099536	synaptic signaling	8.17695e-28	9.31845e-23	61	107 (ADCY1)|116 (ADCYAP1)|773 (CACNA1A)|774 (CACNA1B)|793 (CALB1)|1006 (CDH8)|1131 (CHRM3)|1141 (CHRNB2)|1268 (CNR1)|1392 (CRH)|1393 (CRHBP)|1395 (CRHR2)|1759 (DNM1)|1813 (DRD2)|2048 (EPHB2)|2566 (GABRG2)|2571 (GAD1)|2572 (GAD2)|2742 (GLRA2)|2903 (GRIN2A)|2904 (GRIN2B)|2906 (GRIN2D)|3084 (NRG1)|4923 (NTSR1)|4988 (OPRM1)|5179 (PENK)|5575 (PRKAR1B)|5581 (PRKCE)|5864 (RAB3A)|5865 (RAB3B)|5999 (RGS4)…
		N	GO|GO.BP	GO:0007268	chemical synaptic transmission	2.10574e-27	2.3997e-22	60	107 (ADCY1)|116 (ADCYAP1)|773 (CACNA1A)|774 (CACNA1B)|793 (CALB1)|1006 (CDH8)|1131 (CHRM3)|1141 (CHRNB2)|1268 (CNR1)|1392 (CRH)|1393 (CRHBP)|1395 (CRHR2)|1759 (DNM1)|1813 (DRD2)|2048 (EPHB2)|2566 (GABRG2)|2571 (GAD1)|2572 (GAD2)|2742 (GLRA2)|2903 (GRIN2A)|2904 (GRIN2B)|2906 (GRIN2D)|4923 (NTSR1)|4988 (OPRM1)|5179 (PENK)|5575 (PRKAR1B)|5581 (PRKCE)|5864 (RAB3A)|5865 (RAB3B)|5999 (RGS4)|6616 (SNAP2…
		N	GO|GO.BP	GO:0098916	anterograde trans-synaptic signaling	2.10574e-27	2.3997e-22	60	107 (ADCY1)|116 (ADCYAP1)|773 (CACNA1A)|774 (CACNA1B)|793 (CALB1)|1006 (CDH8)|1131 (CHRM3)|1141 (CHRNB2)|1268 (CNR1)|1392 (CRH)|1393 (CRHBP)|1395 (CRHR2)|1759 (DNM1)|1813 (DRD2)|2048 (EPHB2)|2566 (GABRG2)|2571 (GAD1)|2572 (GAD2)|2742 (GLRA2)|2903 (GRIN2A)|2904 (GRIN2B)|2906 (GRIN2D)|4923 (NTSR1)|4988 (OPRM1)|5179 (PENK)|5575 (PRKAR1B)|5581 (PRKCE)|5864 (RAB3A)|5865 (RAB3B)|5999 (RGS4)|6616 (SNAP2…
		N	GO|GO.BP	GO:0099537	trans-synaptic signaling	3.90158e-27	4.44624e-22	60	107 (ADCY1)|116 (ADCYAP1)|773 (CACNA1A)|774 (CACNA1B)|793 (CALB1)|1006 (CDH8)|1131 (CHRM3)|1141 (CHRNB2)|1268 (CNR1)|1392 (CRH)|1393 (CRHBP)|1395 (CRHR2)|1759 (DNM1)|1813 (DRD2)|2048 (EPHB2)|2566 (GABRG2)|2571 (GAD1)|2572 (GAD2)|2742 (GLRA2)|2903 (GRIN2A)|2904 (GRIN2B)|2906 (GRIN2D)|4923 (NTSR1)|4988 (OPRM1)|5179 (PENK)|5575 (PRKAR1B)|5581 (PRKCE)|5864 (RAB3A)|5865 (RAB3B)|5999 (RGS4)|6616 (SNAP2…
		N	GO|GO.BP	GO:0007267	cell-cell signaling	2.0239e-25	2.30644e-20	87	107 (ADCY1)|116 (ADCYAP1)|367 (AR)|773 (CACNA1A)|774 (CACNA1B)|781 (CACNA2D1)|793 (CALB1)|1006 (CDH8)|1131 (CHRM3)|1141 (CHRNB2)|1268 (CNR1)|1392 (CRH)|1393 (CRHBP)|1395 (CRHR2)|1749 (DLX5)|1759 (DNM1)|1813 (DRD2)|2048 (EPHB2)|2254 (FGF9)|2566 (GABRG2)|2571 (GAD1)|2572 (GAD2)|2587 (GALR1)|2742 (GLRA2)|2796 (GNRH1)|2903 (GRIN2A)|2904 (GRIN2B)|2906 (GRIN2D)|3084 (NRG1)|3623 (INHA)|3747 (KCNC2)|3762…
		N	GO|GO.CC	GO:0030424	axon	9.83244e-25	1.12051e-19	53	116 (ADCYAP1)|478 (ATP1A3)|793 (CALB1)|1006 (CDH8)|1131 (CHRM3)|1268 (CNR1)|1392 (CRH)|1393 (CRHBP)|1395 (CRHR2)|1759 (DNM1)|1813 (DRD2)|2048 (EPHB2)|2566 (GABRG2)|2571 (GAD1)|2572 (GAD2)|2596 (GAP43)|2796 (GNRH1)|3084 (NRG1)|3645 (INSRR)|3747 (KCNC2)|3756 (KCNH1)|3800 (KIF5C)|4345 (CD200)|4923 (NTSR1)|4988 (OPRM1)|5179 (PENK)|5599 (MAPK8)|5864 (RAB3A)|6092 (ROBO2)|6616 (SNAP25)|6812 (STXBP1)|685…
		N	GO|GO.BP	GO:0007399	nervous system development	1.18206e-24	1.34707e-19	105	107 (ADCY1)|116 (ADCYAP1)|1131 (CHRM3)|1141 (CHRNB2)|1268 (CNR1)|1392 (CRH)|1400 (CRMP1)|1608 (DGKG)|1641 (DCX)|1745 (DLX1)|1749 (DLX5)|1813 (DRD2)|2048 (EPHB2)|2254 (FGF9)|2596 (GAP43)|2796 (GNRH1)|2903 (GRIN2A)|2904 (GRIN2B)|2906 (GRIN2D)|3084 (NRG1)|3747 (KCNC2)|3800 (KIF5C)|3925 (STMN1)|4674 (NAP1L2)|4745 (NELL1)|4804 (NGFR)|4808 (NHLH2)|4988 (OPRM1)|5063 (PAK3)|5121 (PCP4)|5179 (PENK)|5599 (…
		N	GO|GO.CC	GO:0043005	neuron projection	1.68983e-24	1.92573e-19	77	116 (ADCYAP1)|478 (ATP1A3)|774 (CACNA1B)|793 (CALB1)|1006 (CDH8)|1131 (CHRM3)|1141 (CHRNB2)|1268 (CNR1)|1392 (CRH)|1393 (CRHBP)|1395 (CRHR2)|1641 (DCX)|1759 (DNM1)|1813 (DRD2)|2048 (EPHB2)|2566 (GABRG2)|2571 (GAD1)|2572 (GAD2)|2596 (GAP43)|2742 (GLRA2)|2796 (GNRH1)|2903 (GRIN2A)|2904 (GRIN2B)|3084 (NRG1)|3623 (INHA)|3645 (INSRR)|3747 (KCNC2)|3756 (KCNH1)|3800 (KIF5C)|3925 (STMN1)|4345 (CD200)|492…
		N	GO|GO.BP	GO:0006836	neurotransmitter transport	5.64352e-18	6.43136e-13	31	107 (ADCY1)|116 (ADCYAP1)|774 (CACNA1B)|1141 (CHRNB2)|1268 (CNR1)|1392 (CRH)|1813 (DRD2)|4923 (NTSR1)|5864 (RAB3A)|5865 (RAB3B)|5999 (RGS4)|6534 (SLC6A7)|6616 (SNAP25)|6812 (STXBP1)|6855 (SYP)|6857 (SYT1)|6861 (SYT5)|7223 (TRPC4)|8224 (SYN3)|8447 (DOC2B)|8448 (DOC2A)|9899 (SV2B)|10815 (CPLX1)|22987 (SV2C)|23025 (UNC13A)|26059 (ERC2)|57586 (SYT13)|63908 (NAPB)|84258 (SYT3)|140679 (SLC32A1)|388662 …
		N	GO|GO.BP	GO:0099504	synaptic vesicle cycle	8.26227e-18	9.41569e-13	27	107 (ADCY1)|1141 (CHRNB2)|1268 (CNR1)|1759 (DNM1)|1813 (DRD2)|5575 (PRKAR1B)|5864 (RAB3A)|5865 (RAB3B)|6616 (SNAP25)|6812 (STXBP1)|6855 (SYP)|6857 (SYT1)|6861 (SYT5)|8224 (SYN3)|8447 (DOC2B)|8448 (DOC2A)|8851 (CDK5R1)|8927 (BSN)|9829 (DNAJC6)|10815 (CPLX1)|23025 (UNC13A)|26059 (ERC2)|29993 (PACSIN1)|57586 (SYT13)|63908 (NAPB)|84258 (SYT3)|140679 (SLC32A1)
		N	GO|GO.CC	GO:0070382	exocytic vesicle	1.07918e-17	1.22984e-12	27	1759 (DNM1)|1813 (DRD2)|2572 (GAD2)|2903 (GRIN2A)|5179 (PENK)|5864 (RAB3A)|5865 (RAB3B)|6616 (SNAP25)|6833 (ABCC8)|6855 (SYP)|6857 (SYT1)|6861 (SYT5)|8224 (SYN3)|8448 (DOC2A)|8927 (BSN)|9143 (SYNGR3)|9899 (SV2B)|22987 (SV2C)|23025 (UNC13A)|55530 (SVOP)|57586 (SYT13)|84258 (SYT3)|84958 (SYTL1)|115827 (RAB3C)|132204 (SYNPR)|140679 (SLC32A1)|388662 (SLC6A17)
		N	GO|GO.CC	GO:0042995	cell projection	1.84513e-17	2.10271e-12	88	58 (ACTA1)|116 (ADCYAP1)|284 (ANGPT1)|478 (ATP1A3)|773 (CACNA1A)|774 (CACNA1B)|793 (CALB1)|1006 (CDH8)|1131 (CHRM3)|1141 (CHRNB2)|1268 (CNR1)|1392 (CRH)|1393 (CRHBP)|1395 (CRHR2)|1641 (DCX)|1759 (DNM1)|1813 (DRD2)|2048 (EPHB2)|2566 (GABRG2)|2571 (GAD1)|2572 (GAD2)|2596 (GAP43)|2742 (GLRA2)|2796 (GNRH1)|2903 (GRIN2A)|2904 (GRIN2B)|3084 (NRG1)|3623 (INHA)|3645 (INSRR)|3747 (KCNC2)|3756 (KCNH1)|3800…
		N	GO|GO.BP	GO:0007154	cell communication	2.67813e-17	3.052e-12	177	107 (ADCY1)|116 (ADCYAP1)|284 (ANGPT1)|367 (AR)|398 (ARHGDIG)|478 (ATP1A3)|534 (ATP6V1G2)|773 (CACNA1A)|774 (CACNA1B)|781 (CACNA2D1)|793 (CALB1)|1006 (CDH8)|1114 (CHGB)|1131 (CHRM3)|1141 (CHRNB2)|1268 (CNR1)|1381 (CRABP1)|1392 (CRH)|1393 (CRHBP)|1395 (CRHR2)|1608 (DGKG)|1612 (DAPK1)|1641 (DCX)|1745 (DLX1)|1749 (DLX5)|1759 (DNM1)|1813 (DRD2)|1832 (DSP)|2048 (EPHB2)|2139 (EYA2)|2254 (FGF9)|2566 (GA…
		N	GO|GO.CC	GO:0120025	plasma membrane bounded cell projection	2.73517e-17	3.117e-12	86	58 (ACTA1)|116 (ADCYAP1)|284 (ANGPT1)|478 (ATP1A3)|774 (CACNA1B)|793 (CALB1)|1006 (CDH8)|1131 (CHRM3)|1141 (CHRNB2)|1268 (CNR1)|1392 (CRH)|1393 (CRHBP)|1395 (CRHR2)|1641 (DCX)|1759 (DNM1)|1813 (DRD2)|2048 (EPHB2)|2566 (GABRG2)|2571 (GAD1)|2572 (GAD2)|2596 (GAP43)|2742 (GLRA2)|2796 (GNRH1)|2903 (GRIN2A)|2904 (GRIN2B)|3084 (NRG1)|3623 (INHA)|3645 (INSRR)|3747 (KCNC2)|3756 (KCNH1)|3800 (KIF5C)|3925 …
		N	GO|GO.CC	GO:0033267	axon part	3.04067e-17	3.46514e-12	35	116 (ADCYAP1)|793 (CALB1)|1006 (CDH8)|1131 (CHRM3)|1268 (CNR1)|1392 (CRH)|1393 (CRHBP)|1395 (CRHR2)|1759 (DNM1)|1813 (DRD2)|2571 (GAD1)|2596 (GAP43)|2796 (GNRH1)|3747 (KCNC2)|3756 (KCNH1)|3800 (KIF5C)|4923 (NTSR1)|5179 (PENK)|5864 (RAB3A)|6092 (ROBO2)|6616 (SNAP25)|6855 (SYP)|7786 (MAP3K12)|8851 (CDK5R1)|10439 (OLFM1)|10815 (CPLX1)|11075 (STMN2)|23025 (UNC13A)|23467 (NPTXR)|26047 (CNTNAP2)|26059 …
		N	GO|GO.BP	GO:0022008	neurogenesis	9.21508e-17	1.05015e-11	72	107 (ADCY1)|116 (ADCYAP1)|1141 (CHRNB2)|1268 (CNR1)|1400 (CRMP1)|1608 (DGKG)|1641 (DCX)|1745 (DLX1)|1749 (DLX5)|1813 (DRD2)|2048 (EPHB2)|2596 (GAP43)|2796 (GNRH1)|2903 (GRIN2A)|3084 (NRG1)|3800 (KIF5C)|3925 (STMN1)|4674 (NAP1L2)|4804 (NGFR)|4988 (OPRM1)|5063 (PAK3)|5121 (PCP4)|5179 (PENK)|5599 (MAPK8)|5864 (RAB3A)|6092 (ROBO2)|6616 (SNAP25)|6664 (SOX11)|6812 (STXBP1)|6833 (ABCC8)|6857 (SYT1)|7161…
		N	GO|GO.BP	GO:0023052	signaling	2.0806e-16	2.37105e-11	174	107 (ADCY1)|116 (ADCYAP1)|284 (ANGPT1)|367 (AR)|398 (ARHGDIG)|478 (ATP1A3)|534 (ATP6V1G2)|773 (CACNA1A)|774 (CACNA1B)|781 (CACNA2D1)|793 (CALB1)|1006 (CDH8)|1114 (CHGB)|1131 (CHRM3)|1141 (CHRNB2)|1268 (CNR1)|1381 (CRABP1)|1392 (CRH)|1393 (CRHBP)|1395 (CRHR2)|1608 (DGKG)|1612 (DAPK1)|1641 (DCX)|1745 (DLX1)|1749 (DLX5)|1759 (DNM1)|1813 (DRD2)|1832 (DSP)|2048 (EPHB2)|2139 (EYA2)|2254 (FGF9)|2566 (GA…
		N	GO|GO.BP	GO:0023061	signal release	3.33172e-16	3.79683e-11	37	107 (ADCY1)|116 (ADCYAP1)|773 (CACNA1A)|774 (CACNA1B)|1141 (CHRNB2)|1268 (CNR1)|1392 (CRH)|1393 (CRHBP)|1813 (DRD2)|2587 (GALR1)|3623 (INHA)|3747 (KCNC2)|4988 (OPRM1)|5581 (PRKCE)|5864 (RAB3A)|6616 (SNAP25)|6664 (SOX11)|6812 (STXBP1)|6833 (ABCC8)|6855 (SYP)|6857 (SYT1)|6861 (SYT5)|7425 (VGF)|7432 (VIP)|7447 (VSNL1)|8224 (SYN3)|8447 (DOC2B)|8448 (DOC2A)|10815 (CPLX1)|23025 (UNC13A)|26059 (ERC2)|55…
		N	GO|GO.BP	GO:0030182	neuron differentiation	6.95093e-16	7.92128e-11	64	107 (ADCY1)|116 (ADCYAP1)|1141 (CHRNB2)|1268 (CNR1)|1400 (CRMP1)|1608 (DGKG)|1641 (DCX)|1745 (DLX1)|1749 (DLX5)|1813 (DRD2)|2048 (EPHB2)|2596 (GAP43)|3084 (NRG1)|3800 (KIF5C)|3925 (STMN1)|4674 (NAP1L2)|4804 (NGFR)|5063 (PAK3)|5121 (PCP4)|5599 (MAPK8)|5864 (RAB3A)|6092 (ROBO2)|6616 (SNAP25)|6664 (SOX11)|6812 (STXBP1)|6857 (SYT1)|7161 (TP73)|7532 (YWHAG)|8851 (CDK5R1)|9211 (LGI1)|9369 (NRXN3)|9856 …
		N	GO|GO.CC	GO:0150034	distal axon	1.35344e-15	1.54238e-10	29	116 (ADCYAP1)|793 (CALB1)|1006 (CDH8)|1131 (CHRM3)|1268 (CNR1)|1393 (CRHBP)|1395 (CRHR2)|1813 (DRD2)|2571 (GAD1)|2596 (GAP43)|2796 (GNRH1)|3747 (KCNC2)|3800 (KIF5C)|4923 (NTSR1)|5179 (PENK)|5864 (RAB3A)|6616 (SNAP25)|6855 (SYP)|7786 (MAP3K12)|8851 (CDK5R1)|10439 (OLFM1)|10815 (CPLX1)|11075 (STMN2)|23025 (UNC13A)|23467 (NPTXR)|26059 (ERC2)|29993 (PACSIN1)|91752 (ZNF804A)|140679 (SLC32A1)
		N	GO|GO.CC	GO:0008021	synaptic vesicle	1.39865e-15	1.59391e-10	24	1759 (DNM1)|1813 (DRD2)|2572 (GAD2)|2903 (GRIN2A)|5179 (PENK)|5864 (RAB3A)|5865 (RAB3B)|6616 (SNAP25)|6833 (ABCC8)|6855 (SYP)|6857 (SYT1)|6861 (SYT5)|8224 (SYN3)|8448 (DOC2A)|8927 (BSN)|9143 (SYNGR3)|9899 (SV2B)|22987 (SV2C)|23025 (UNC13A)|55530 (SVOP)|115827 (RAB3C)|132204 (SYNPR)|140679 (SLC32A1)|388662 (SLC6A17)
		N	GO|GO.CC	GO:0036477	somatodendritic compartment	1.51087e-15	1.72179e-10	49	116 (ADCYAP1)|478 (ATP1A3)|773 (CACNA1A)|774 (CACNA1B)|793 (CALB1)|1131 (CHRM3)|1392 (CRH)|1393 (CRHBP)|1395 (CRHR2)|1759 (DNM1)|1813 (DRD2)|2048 (EPHB2)|2566 (GABRG2)|2796 (GNRH1)|3623 (INHA)|3747 (KCNC2)|3756 (KCNH1)|3800 (KIF5C)|4345 (CD200)|4923 (NTSR1)|4988 (OPRM1)|5136 (PDE1A)|5179 (PENK)|5599 (MAPK8)|6616 (SNAP25)|6750 (SST)|6861 (SYT5)|7432 (VIP)|7442 (TRPV1)|8851 (CDK5R1)|8927 (BSN)|9481…
		N	GO|GO.BP	GO:0048699	generation of neurons	2.07088e-15	2.35997e-10	67	107 (ADCY1)|116 (ADCYAP1)|1141 (CHRNB2)|1268 (CNR1)|1400 (CRMP1)|1608 (DGKG)|1641 (DCX)|1745 (DLX1)|1749 (DLX5)|1813 (DRD2)|2048 (EPHB2)|2596 (GAP43)|2796 (GNRH1)|3084 (NRG1)|3800 (KIF5C)|3925 (STMN1)|4674 (NAP1L2)|4804 (NGFR)|4988 (OPRM1)|5063 (PAK3)|5121 (PCP4)|5599 (MAPK8)|5864 (RAB3A)|6092 (ROBO2)|6616 (SNAP25)|6664 (SOX11)|6812 (STXBP1)|6833 (ABCC8)|6857 (SYT1)|7161 (TP73)|7532 (YWHAG)|8851 …
		N	GO|GO.CC	GO:0030672	synaptic vesicle membrane	2.47823e-15	2.82419e-10	19	1813 (DRD2)|2572 (GAD2)|5864 (RAB3A)|5865 (RAB3B)|6833 (ABCC8)|6855 (SYP)|6857 (SYT1)|6861 (SYT5)|8224 (SYN3)|8448 (DOC2A)|9143 (SYNGR3)|9899 (SV2B)|22987 (SV2C)|23025 (UNC13A)|55530 (SVOP)|115827 (RAB3C)|132204 (SYNPR)|140679 (SLC32A1)|388662 (SLC6A17)
		N	GO|GO.CC	GO:0099501	exocytic vesicle membrane	2.47823e-15	2.82419e-10	19	1813 (DRD2)|2572 (GAD2)|5864 (RAB3A)|5865 (RAB3B)|6833 (ABCC8)|6855 (SYP)|6857 (SYT1)|6861 (SYT5)|8224 (SYN3)|8448 (DOC2A)|9143 (SYNGR3)|9899 (SV2B)|22987 (SV2C)|23025 (UNC13A)|55530 (SVOP)|115827 (RAB3C)|132204 (SYNPR)|140679 (SLC32A1)|388662 (SLC6A17)
		N	GO|GO.CC	GO:0005886	plasma membrane	1.80183e-14	2.05337e-09	152	107 (ADCY1)|284 (ANGPT1)|367 (AR)|398 (ARHGDIG)|478 (ATP1A3)|773 (CACNA1A)|774 (CACNA1B)|781 (CACNA2D1)|956 (ENTPD3)|1005 (CDH7)|1006 (CDH8)|1131 (CHRM3)|1141 (CHRNB2)|1268 (CNR1)|1292 (COL6A2)|1395 (CRHR2)|1608 (DGKG)|1612 (DAPK1)|1759 (DNM1)|1813 (DRD2)|1832 (DSP)|2048 (EPHB2)|2566 (GABRG2)|2571 (GAD1)|2572 (GAD2)|2587 (GALR1)|2596 (GAP43)|2742 (GLRA2)|2834 (PRLHR)|2835 (GPR12)|2903 (GRIN2A)|29…
		N	GO|GO.CC	GO:0071944	cell periphery	1.81287e-14	2.06595e-09	154	107 (ADCY1)|284 (ANGPT1)|367 (AR)|398 (ARHGDIG)|478 (ATP1A3)|773 (CACNA1A)|774 (CACNA1B)|781 (CACNA2D1)|956 (ENTPD3)|1005 (CDH7)|1006 (CDH8)|1131 (CHRM3)|1141 (CHRNB2)|1268 (CNR1)|1292 (COL6A2)|1395 (CRHR2)|1608 (DGKG)|1612 (DAPK1)|1759 (DNM1)|1813 (DRD2)|1832 (DSP)|2048 (EPHB2)|2566 (GABRG2)|2571 (GAD1)|2572 (GAD2)|2587 (GALR1)|2596 (GAP43)|2742 (GLRA2)|2834 (PRLHR)|2835 (GPR12)|2903 (GRIN2A)|29…
		N	GO|GO.BP	GO:0097479	synaptic vesicle localization	2.19887e-14	2.50583e-09	22	107 (ADCY1)|1141 (CHRNB2)|1268 (CNR1)|1759 (DNM1)|1813 (DRD2)|3800 (KIF5C)|5864 (RAB3A)|6616 (SNAP25)|6812 (STXBP1)|6855 (SYP)|6857 (SYT1)|6861 (SYT5)|8224 (SYN3)|8447 (DOC2B)|8448 (DOC2A)|10815 (CPLX1)|23025 (UNC13A)|26059 (ERC2)|57586 (SYT13)|63908 (NAPB)|80128 (TRIM46)|84258 (SYT3)
		N	GO|GO.BP	GO:0050804	modulation of chemical synaptic transmission	3.87994e-14	4.42158e-09	33	107 (ADCY1)|116 (ADCYAP1)|793 (CALB1)|1141 (CHRNB2)|1268 (CNR1)|1392 (CRH)|1395 (CRHR2)|1759 (DNM1)|1813 (DRD2)|2048 (EPHB2)|2903 (GRIN2A)|2904 (GRIN2B)|2906 (GRIN2D)|4923 (NTSR1)|5575 (PRKAR1B)|5581 (PRKCE)|5864 (RAB3A)|5865 (RAB3B)|5999 (RGS4)|6616 (SNAP25)|6812 (STXBP1)|6855 (SYP)|6857 (SYT1)|7532 (YWHAG)|8224 (SYN3)|9211 (LGI1)|10369 (CACNG2)|10815 (CPLX1)|23025 (UNC13A)|23467 (NPTXR)|56853 (…
		N	GO|GO.BP	GO:0099177	regulation of trans-synaptic signaling	4.1523e-14	4.73197e-09	33	107 (ADCY1)|116 (ADCYAP1)|793 (CALB1)|1141 (CHRNB2)|1268 (CNR1)|1392 (CRH)|1395 (CRHR2)|1759 (DNM1)|1813 (DRD2)|2048 (EPHB2)|2903 (GRIN2A)|2904 (GRIN2B)|2906 (GRIN2D)|4923 (NTSR1)|5575 (PRKAR1B)|5581 (PRKCE)|5864 (RAB3A)|5865 (RAB3B)|5999 (RGS4)|6616 (SNAP25)|6812 (STXBP1)|6855 (SYP)|6857 (SYT1)|7532 (YWHAG)|8224 (SYN3)|9211 (LGI1)|10369 (CACNG2)|10815 (CPLX1)|23025 (UNC13A)|23467 (NPTXR)|56853 (…
		N	GO|GO.BP	GO:0048666	neuron development	4.25085e-14	4.84427e-09	54	107 (ADCY1)|116 (ADCYAP1)|1141 (CHRNB2)|1268 (CNR1)|1400 (CRMP1)|1608 (DGKG)|1641 (DCX)|1749 (DLX5)|1813 (DRD2)|2048 (EPHB2)|2596 (GAP43)|3800 (KIF5C)|3925 (STMN1)|4804 (NGFR)|5063 (PAK3)|5599 (MAPK8)|5864 (RAB3A)|6092 (ROBO2)|6616 (SNAP25)|6812 (STXBP1)|6857 (SYT1)|8851 (CDK5R1)|9211 (LGI1)|9369 (NRXN3)|9856 (KIAA0319)|9912 (ARHGAP44)|10381 (TUBB3)|10439 (OLFM1)|11023 (VAX1)|11075 (STMN2)|22876 …
		N	GO|GO.CC	GO:0044459	plasma membrane part	4.87677e-14	5.55757e-09	97	107 (ADCY1)|478 (ATP1A3)|773 (CACNA1A)|774 (CACNA1B)|781 (CACNA2D1)|1005 (CDH7)|1006 (CDH8)|1131 (CHRM3)|1141 (CHRNB2)|1268 (CNR1)|1395 (CRHR2)|1759 (DNM1)|1813 (DRD2)|1832 (DSP)|2048 (EPHB2)|2566 (GABRG2)|2572 (GAD2)|2587 (GALR1)|2596 (GAP43)|2742 (GLRA2)|2834 (PRLHR)|2835 (GPR12)|2903 (GRIN2A)|2904 (GRIN2B)|2906 (GRIN2D)|3038 (HAS3)|3084 (NRG1)|3623 (INHA)|3645 (INSRR)|3747 (KCNC2)|3756 (KCNH1)…
		N	GO|GO.BP	GO:0048489	synaptic vesicle transport	5.51811e-14	6.28844e-09	21	107 (ADCY1)|1141 (CHRNB2)|1268 (CNR1)|1759 (DNM1)|1813 (DRD2)|3800 (KIF5C)|5864 (RAB3A)|6616 (SNAP25)|6812 (STXBP1)|6855 (SYP)|6857 (SYT1)|6861 (SYT5)|8447 (DOC2B)|8448 (DOC2A)|10815 (CPLX1)|23025 (UNC13A)|26059 (ERC2)|57586 (SYT13)|63908 (NAPB)|80128 (TRIM46)|84258 (SYT3)
		N	GO|GO.BP	GO:0097480	establishment of synaptic vesicle localization	5.51811e-14	6.28844e-09	21	107 (ADCY1)|1141 (CHRNB2)|1268 (CNR1)|1759 (DNM1)|1813 (DRD2)|3800 (KIF5C)|5864 (RAB3A)|6616 (SNAP25)|6812 (STXBP1)|6855 (SYP)|6857 (SYT1)|6861 (SYT5)|8447 (DOC2B)|8448 (DOC2A)|10815 (CPLX1)|23025 (UNC13A)|26059 (ERC2)|57586 (SYT13)|63908 (NAPB)|80128 (TRIM46)|84258 (SYT3)
		N	GO|GO.CC	GO:0044306	neuron projection terminus	6.82084e-14	7.77303e-09	20	116 (ADCYAP1)|793 (CALB1)|1006 (CDH8)|1131 (CHRM3)|1393 (CRHBP)|1395 (CRHR2)|1813 (DRD2)|2571 (GAD1)|2796 (GNRH1)|3747 (KCNC2)|4923 (NTSR1)|5179 (PENK)|5864 (RAB3A)|6855 (SYP)|6857 (SYT1)|8927 (BSN)|10815 (CPLX1)|23025 (UNC13A)|29993 (PACSIN1)|140679 (SLC32A1)
		N	GO|GO.BP	GO:0050806	positive regulation of synaptic transmission	1.05301e-13	1.20001e-08	21	116 (ADCYAP1)|793 (CALB1)|1141 (CHRNB2)|1268 (CNR1)|1392 (CRH)|1395 (CRHR2)|1813 (DRD2)|2048 (EPHB2)|2903 (GRIN2A)|2904 (GRIN2B)|2906 (GRIN2D)|4923 (NTSR1)|5581 (PRKCE)|5865 (RAB3B)|5999 (RGS4)|6616 (SNAP25)|6812 (STXBP1)|6857 (SYT1)|9211 (LGI1)|10369 (CACNG2)|23025 (UNC13A)
		N	GO|GO.BP	GO:0007275	multicellular organism development	1.33701e-13	1.52366e-08	146	58 (ACTA1)|107 (ADCY1)|116 (ADCYAP1)|284 (ANGPT1)|367 (AR)|793 (CALB1)|1131 (CHRM3)|1141 (CHRNB2)|1268 (CNR1)|1292 (COL6A2)|1310 (COL19A1)|1381 (CRABP1)|1392 (CRH)|1400 (CRMP1)|1608 (DGKG)|1641 (DCX)|1745 (DLX1)|1749 (DLX5)|1813 (DRD2)|1832 (DSP)|2048 (EPHB2)|2139 (EYA2)|2254 (FGF9)|2566 (GABRG2)|2596 (GAP43)|2796 (GNRH1)|2903 (GRIN2A)|2904 (GRIN2B)|2906 (GRIN2D)|3084 (NRG1)|3623 (INHA)|3645 (INS…
		N	GO|GO.BP	GO:0048468	cell development	1.7347e-13	1.97687e-08	79	58 (ACTA1)|107 (ADCY1)|116 (ADCYAP1)|367 (AR)|1141 (CHRNB2)|1268 (CNR1)|1292 (COL6A2)|1400 (CRMP1)|1608 (DGKG)|1641 (DCX)|1745 (DLX1)|1749 (DLX5)|1813 (DRD2)|2048 (EPHB2)|2596 (GAP43)|2796 (GNRH1)|3084 (NRG1)|3623 (INHA)|3800 (KIF5C)|3880 (KRT19)|3925 (STMN1)|4674 (NAP1L2)|4804 (NGFR)|4880 (NPPC)|4988 (OPRM1)|5063 (PAK3)|5121 (PCP4)|5241 (PGR)|5599 (MAPK8)|5864 (RAB3A)|5999 (RGS4)|6092 (ROBO2)|66…
		N	GO|GO.BP	GO:0051049	regulation of transport	1.96899e-13	2.24386e-08	72	107 (ADCY1)|116 (ADCYAP1)|284 (ANGPT1)|773 (CACNA1A)|774 (CACNA1B)|781 (CACNA2D1)|1141 (CHRNB2)|1268 (CNR1)|1392 (CRH)|1393 (CRHBP)|1612 (DAPK1)|1759 (DNM1)|1813 (DRD2)|2048 (EPHB2)|2587 (GALR1)|3084 (NRG1)|3623 (INHA)|3747 (KCNC2)|3756 (KCNH1)|3762 (KCNJ5)|3788 (KCNS2)|4345 (CD200)|4923 (NTSR1)|4988 (OPRM1)|5575 (PRKAR1B)|5581 (PRKCE)|5599 (MAPK8)|5864 (RAB3A)|5865 (RAB3B)|5999 (RGS4)|6616 (SNAP…
		N	GO|GO.BP	GO:0099003	vesicle-mediated transport in synapse	2.37639e-13	2.70813e-08	23	107 (ADCY1)|1141 (CHRNB2)|1268 (CNR1)|1759 (DNM1)|1813 (DRD2)|3800 (KIF5C)|5864 (RAB3A)|6616 (SNAP25)|6812 (STXBP1)|6855 (SYP)|6857 (SYT1)|6861 (SYT5)|8447 (DOC2B)|8448 (DOC2A)|9829 (DNAJC6)|10815 (CPLX1)|23025 (UNC13A)|26059 (ERC2)|29993 (PACSIN1)|57586 (SYT13)|63908 (NAPB)|80128 (TRIM46)|84258 (SYT3)
		N	GO|GO.BP	GO:0007269	neurotransmitter secretion	2.82005e-13	3.21373e-08	21	107 (ADCY1)|774 (CACNA1B)|1141 (CHRNB2)|1268 (CNR1)|1813 (DRD2)|5864 (RAB3A)|6616 (SNAP25)|6812 (STXBP1)|6855 (SYP)|6857 (SYT1)|6861 (SYT5)|8224 (SYN3)|8447 (DOC2B)|8448 (DOC2A)|10815 (CPLX1)|23025 (UNC13A)|26059 (ERC2)|57586 (SYT13)|63908 (NAPB)|84258 (SYT3)|140679 (SLC32A1)
		N	GO|GO.BP	GO:0099643	signal release from synapse	2.82005e-13	3.21373e-08	21	107 (ADCY1)|774 (CACNA1B)|1141 (CHRNB2)|1268 (CNR1)|1813 (DRD2)|5864 (RAB3A)|6616 (SNAP25)|6812 (STXBP1)|6855 (SYP)|6857 (SYT1)|6861 (SYT5)|8224 (SYN3)|8447 (DOC2B)|8448 (DOC2A)|10815 (CPLX1)|23025 (UNC13A)|26059 (ERC2)|57586 (SYT13)|63908 (NAPB)|84258 (SYT3)|140679 (SLC32A1)
		N	GO|GO.CC	GO:0044463	cell projection part	3.17932e-13	3.62315e-08	62	116 (ADCYAP1)|774 (CACNA1B)|793 (CALB1)|1006 (CDH8)|1131 (CHRM3)|1268 (CNR1)|1392 (CRH)|1393 (CRHBP)|1395 (CRHR2)|1641 (DCX)|1759 (DNM1)|1813 (DRD2)|2048 (EPHB2)|2566 (GABRG2)|2571 (GAD1)|2596 (GAP43)|2796 (GNRH1)|3623 (INHA)|3747 (KCNC2)|3756 (KCNH1)|3800 (KIF5C)|4923 (NTSR1)|4988 (OPRM1)|5179 (PENK)|5575 (PRKAR1B)|5599 (MAPK8)|5864 (RAB3A)|6092 (ROBO2)|6519 (SLC3A1)|6616 (SNAP25)|6855 (SYP)|685…
		N	GO|GO.CC	GO:0120038	plasma membrane bounded cell projection part	3.17932e-13	3.62315e-08	62	116 (ADCYAP1)|774 (CACNA1B)|793 (CALB1)|1006 (CDH8)|1131 (CHRM3)|1268 (CNR1)|1392 (CRH)|1393 (CRHBP)|1395 (CRHR2)|1641 (DCX)|1759 (DNM1)|1813 (DRD2)|2048 (EPHB2)|2566 (GABRG2)|2571 (GAD1)|2596 (GAP43)|2796 (GNRH1)|3623 (INHA)|3747 (KCNC2)|3756 (KCNH1)|3800 (KIF5C)|4923 (NTSR1)|4988 (OPRM1)|5179 (PENK)|5575 (PRKAR1B)|5599 (MAPK8)|5864 (RAB3A)|6092 (ROBO2)|6519 (SLC3A1)|6616 (SNAP25)|6855 (SYP)|685…
		N	GO|GO.CC	GO:0043025	neuronal cell body	4.24142e-13	4.83352e-08	34	116 (ADCYAP1)|478 (ATP1A3)|773 (CACNA1A)|774 (CACNA1B)|793 (CALB1)|1392 (CRH)|1393 (CRHBP)|1813 (DRD2)|2048 (EPHB2)|2796 (GNRH1)|3623 (INHA)|3747 (KCNC2)|3756 (KCNH1)|3800 (KIF5C)|4345 (CD200)|4923 (NTSR1)|4988 (OPRM1)|5136 (PDE1A)|5179 (PENK)|6750 (SST)|6861 (SYT5)|7432 (VIP)|7442 (TRPV1)|8851 (CDK5R1)|9481 (SLC25A27)|10439 (OLFM1)|10815 (CPLX1)|11075 (STMN2)|22876 (INPP5F)|23467 (NPTXR)|26047 (…
		N	GO|GO.CC	GO:0097060	synaptic membrane	5.166e-13	5.88717e-08	32	107 (ADCY1)|1006 (CDH8)|1131 (CHRM3)|1141 (CHRNB2)|1268 (CNR1)|1759 (DNM1)|1813 (DRD2)|2048 (EPHB2)|2566 (GABRG2)|2572 (GAD2)|2742 (GLRA2)|2903 (GRIN2A)|2904 (GRIN2B)|2906 (GRIN2D)|3747 (KCNC2)|3756 (KCNH1)|4988 (OPRM1)|6616 (SNAP25)|6812 (STXBP1)|6855 (SYP)|6857 (SYT1)|7442 (TRPV1)|9177 (HTR3B)|9228 (DLGAP2)|10369 (CACNG2)|23025 (UNC13A)|23623 (RUSC1)|26059 (ERC2)|53942 (CNTN5)|57692 (MAGEE1)|38…
		N	GO|GO.BP	GO:0048731	system development	5.76712e-13	6.57221e-08	134	58 (ACTA1)|107 (ADCY1)|116 (ADCYAP1)|284 (ANGPT1)|367 (AR)|793 (CALB1)|1131 (CHRM3)|1141 (CHRNB2)|1268 (CNR1)|1292 (COL6A2)|1310 (COL19A1)|1392 (CRH)|1400 (CRMP1)|1608 (DGKG)|1641 (DCX)|1745 (DLX1)|1749 (DLX5)|1813 (DRD2)|1832 (DSP)|2048 (EPHB2)|2254 (FGF9)|2596 (GAP43)|2796 (GNRH1)|2903 (GRIN2A)|2904 (GRIN2B)|2906 (GRIN2D)|3084 (NRG1)|3623 (INHA)|3747 (KCNC2)|3800 (KIF5C)|3880 (KRT19)|3925 (STMN…
		N	GO|GO.CC	GO:0043679	axon terminus	6.79358e-13	7.74196e-08	18	116 (ADCYAP1)|793 (CALB1)|1006 (CDH8)|1131 (CHRM3)|1393 (CRHBP)|1395 (CRHR2)|1813 (DRD2)|2571 (GAD1)|2796 (GNRH1)|3747 (KCNC2)|4923 (NTSR1)|5179 (PENK)|5864 (RAB3A)|6855 (SYP)|10815 (CPLX1)|23025 (UNC13A)|29993 (PACSIN1)|140679 (SLC32A1)
		N	GO|GO.BP	GO:0007610	behavior	7.2904e-13	8.30814e-08	37	107 (ADCY1)|116 (ADCYAP1)|774 (CACNA1B)|793 (CALB1)|1141 (CHRNB2)|1268 (CNR1)|1392 (CRH)|1393 (CRHBP)|1813 (DRD2)|2048 (EPHB2)|2566 (GABRG2)|2571 (GAD1)|2834 (PRLHR)|2903 (GRIN2A)|2904 (GRIN2B)|2906 (GRIN2D)|3084 (NRG1)|4808 (NHLH2)|4886 (NPY1R)|4923 (NTSR1)|4988 (OPRM1)|5179 (PENK)|5575 (PRKAR1B)|5581 (PRKCE)|6616 (SNAP25)|6833 (ABCC8)|7432 (VIP)|7442 (TRPV1)|7545 (ZIC1)|9369 (NRXN3)|22876 (INPP…
		N	GO|GO.BP	GO:0016079	synaptic vesicle exocytosis	1.05042e-12	1.19706e-07	18	107 (ADCY1)|1141 (CHRNB2)|1268 (CNR1)|1813 (DRD2)|5864 (RAB3A)|6616 (SNAP25)|6812 (STXBP1)|6855 (SYP)|6857 (SYT1)|6861 (SYT5)|8447 (DOC2B)|8448 (DOC2A)|10815 (CPLX1)|23025 (UNC13A)|26059 (ERC2)|57586 (SYT13)|63908 (NAPB)|84258 (SYT3)
		N	GO|GO.BP	GO:0001505	regulation of neurotransmitter levels	2.00842e-12	2.2888e-07	28	107 (ADCY1)|774 (CACNA1B)|1141 (CHRNB2)|1268 (CNR1)|1813 (DRD2)|2571 (GAD1)|2572 (GAD2)|2903 (GRIN2A)|4923 (NTSR1)|5864 (RAB3A)|5865 (RAB3B)|5999 (RGS4)|6616 (SNAP25)|6812 (STXBP1)|6855 (SYP)|6857 (SYT1)|6861 (SYT5)|7442 (TRPV1)|8224 (SYN3)|8447 (DOC2B)|8448 (DOC2A)|10815 (CPLX1)|23025 (UNC13A)|26059 (ERC2)|57586 (SYT13)|63908 (NAPB)|84258 (SYT3)|140679 (SLC32A1)
		N	GO|GO.BP	GO:0065008	regulation of biological quality	2.28709e-12	2.60637e-07	115	107 (ADCY1)|116 (ADCYAP1)|284 (ANGPT1)|367 (AR)|478 (ATP1A3)|773 (CACNA1A)|774 (CACNA1B)|781 (CACNA2D1)|793 (CALB1)|1006 (CDH8)|1131 (CHRM3)|1141 (CHRNB2)|1268 (CNR1)|1381 (CRABP1)|1392 (CRH)|1393 (CRHBP)|1395 (CRHR2)|1608 (DGKG)|1759 (DNM1)|1813 (DRD2)|1832 (DSP)|2048 (EPHB2)|2139 (EYA2)|2170 (FABP3)|2566 (GABRG2)|2571 (GAD1)|2572 (GAD2)|2587 (GALR1)|2596 (GAP43)|2742 (GLRA2)|2834 (PRLHR)|2835 (…
		N	GO|GO.CC	GO:0098794	postsynapse	2.56341e-12	2.92126e-07	37	107 (ADCY1)|793 (CALB1)|1131 (CHRM3)|1141 (CHRNB2)|1759 (DNM1)|1813 (DRD2)|2048 (EPHB2)|2566 (GABRG2)|2596 (GAP43)|2742 (GLRA2)|2903 (GRIN2A)|2904 (GRIN2B)|2906 (GRIN2D)|3747 (KCNC2)|3756 (KCNH1)|4923 (NTSR1)|4988 (OPRM1)|5063 (PAK3)|6616 (SNAP25)|6812 (STXBP1)|7442 (TRPV1)|8224 (SYN3)|8851 (CDK5R1)|8927 (BSN)|9118 (INA)|9177 (HTR3B)|9228 (DLGAP2)|9758 (FRMPD4)|9829 (DNAJC6)|9912 (ARHGAP44)|10369…
		N	GO|GO.CC	GO:0044297	cell body	3.08211e-12	3.51237e-07	35	58 (ACTA1)|116 (ADCYAP1)|478 (ATP1A3)|773 (CACNA1A)|774 (CACNA1B)|793 (CALB1)|1392 (CRH)|1393 (CRHBP)|1813 (DRD2)|2048 (EPHB2)|2796 (GNRH1)|3623 (INHA)|3747 (KCNC2)|3756 (KCNH1)|3800 (KIF5C)|4345 (CD200)|4923 (NTSR1)|4988 (OPRM1)|5136 (PDE1A)|5179 (PENK)|6750 (SST)|6861 (SYT5)|7432 (VIP)|7442 (TRPV1)|8851 (CDK5R1)|9481 (SLC25A27)|10439 (OLFM1)|10815 (CPLX1)|11075 (STMN2)|22876 (INPP5F)|23467 (NPT…
		N	GO|GO.CC	GO:0030133	transport vesicle	3.65115e-12	4.16085e-07	29	1759 (DNM1)|1813 (DRD2)|2572 (GAD2)|2903 (GRIN2A)|5122 (PCSK1)|5179 (PENK)|5864 (RAB3A)|5865 (RAB3B)|6616 (SNAP25)|6833 (ABCC8)|6855 (SYP)|6857 (SYT1)|6861 (SYT5)|7425 (VGF)|8224 (SYN3)|8448 (DOC2A)|8927 (BSN)|9143 (SYNGR3)|9899 (SV2B)|22987 (SV2C)|23025 (UNC13A)|55530 (SVOP)|57586 (SYT13)|84258 (SYT3)|84958 (SYTL1)|115827 (RAB3C)|132204 (SYNPR)|140679 (SLC32A1)|388662 (SLC6A17)
		N	GO|GO.BP	GO:0017156	calcium ion regulated exocytosis	4.91934e-12	5.60608e-07	19	107 (ADCY1)|1141 (CHRNB2)|1268 (CNR1)|1813 (DRD2)|5864 (RAB3A)|6616 (SNAP25)|6812 (STXBP1)|6855 (SYP)|6857 (SYT1)|6861 (SYT5)|8447 (DOC2B)|8448 (DOC2A)|10815 (CPLX1)|23025 (UNC13A)|26059 (ERC2)|55503 (TRPV6)|57586 (SYT13)|63908 (NAPB)|84258 (SYT3)
		N	GO|GO.BP	GO:0042391	regulation of membrane potential	9.64297e-12	1.09891e-06	30	116 (ADCYAP1)|478 (ATP1A3)|773 (CACNA1A)|774 (CACNA1B)|781 (CACNA2D1)|1141 (CHRNB2)|1268 (CNR1)|1813 (DRD2)|1832 (DSP)|2566 (GABRG2)|2742 (GLRA2)|2903 (GRIN2A)|2904 (GRIN2B)|2906 (GRIN2D)|3747 (KCNC2)|3756 (KCNH1)|3762 (KCNJ5)|4923 (NTSR1)|4988 (OPRM1)|5999 (RGS4)|7442 (TRPV1)|9177 (HTR3B)|9481 (SLC25A27)|10021 (HCN4)|10369 (CACNG2)|10962 (MLLT11)|55800 (SCN3B)|56853 (CELF4)|57369 (GJD2)|348980 (…
		N	GO|GO.BP	GO:0010646	regulation of cell communication	1.06048e-11	1.20852e-06	106	107 (ADCY1)|116 (ADCYAP1)|284 (ANGPT1)|367 (AR)|398 (ARHGDIG)|773 (CACNA1A)|793 (CALB1)|1114 (CHGB)|1141 (CHRNB2)|1268 (CNR1)|1392 (CRH)|1393 (CRHBP)|1395 (CRHR2)|1612 (DAPK1)|1745 (DLX1)|1749 (DLX5)|1759 (DNM1)|1813 (DRD2)|2048 (EPHB2)|2139 (EYA2)|2254 (FGF9)|2587 (GALR1)|2796 (GNRH1)|2903 (GRIN2A)|2904 (GRIN2B)|2906 (GRIN2D)|3084 (NRG1)|3623 (INHA)|3645 (INSRR)|3747 (KCNC2)|3925 (STMN1)|4293 (M…
		N	GO|GO.BP	GO:0031175	neuron projection development	1.19859e-11	1.36591e-06	46	107 (ADCY1)|116 (ADCYAP1)|1141 (CHRNB2)|1268 (CNR1)|1400 (CRMP1)|1749 (DLX5)|1813 (DRD2)|2048 (EPHB2)|2596 (GAP43)|3800 (KIF5C)|3925 (STMN1)|4804 (NGFR)|5063 (PAK3)|5864 (RAB3A)|6092 (ROBO2)|6616 (SNAP25)|6812 (STXBP1)|6857 (SYT1)|8851 (CDK5R1)|9211 (LGI1)|9369 (NRXN3)|9856 (KIAA0319)|9912 (ARHGAP44)|10381 (TUBB3)|10439 (OLFM1)|11023 (VAX1)|11075 (STMN2)|22876 (INPP5F)|23025 (UNC13A)|23072 (HECW1…
		N	GO|GO.CC	GO:0042734	presynaptic membrane	1.22666e-11	1.3979e-06	19	1131 (CHRM3)|1141 (CHRNB2)|1268 (CNR1)|1759 (DNM1)|1813 (DRD2)|2048 (EPHB2)|2572 (GAD2)|2903 (GRIN2A)|3747 (KCNC2)|3756 (KCNH1)|4988 (OPRM1)|6616 (SNAP25)|6812 (STXBP1)|6855 (SYP)|6857 (SYT1)|23025 (UNC13A)|26059 (ERC2)|53942 (CNTN5)|386617 (KCTD8)
		N	GO|GO.MF	GO:0022843	voltage-gated cation channel activity	1.43634e-11	1.63685e-06	18	773 (CACNA1A)|774 (CACNA1B)|781 (CACNA2D1)|1268 (CNR1)|2903 (GRIN2A)|2904 (GRIN2B)|2906 (GRIN2D)|3747 (KCNC2)|3756 (KCNH1)|3762 (KCNJ5)|3788 (KCNS2)|4988 (OPRM1)|6616 (SNAP25)|6833 (ABCC8)|10021 (HCN4)|10369 (CACNG2)|170850 (KCNG3)|348980 (HCN1)
		N	GO|GO.CC	GO:0031226	intrinsic component of plasma membrane	1.81392e-11	2.06714e-06	65	107 (ADCY1)|478 (ATP1A3)|1131 (CHRM3)|1141 (CHRNB2)|1268 (CNR1)|1395 (CRHR2)|1813 (DRD2)|2048 (EPHB2)|2566 (GABRG2)|2587 (GALR1)|2742 (GLRA2)|2834 (PRLHR)|2835 (GPR12)|2903 (GRIN2A)|2904 (GRIN2B)|2906 (GRIN2D)|3038 (HAS3)|3084 (NRG1)|3645 (INSRR)|3747 (KCNC2)|3756 (KCNH1)|3762 (KCNJ5)|3788 (KCNS2)|4345 (CD200)|4804 (NGFR)|4886 (NPY1R)|4923 (NTSR1)|4988 (OPRM1)|6519 (SLC3A1)|6534 (SLC6A7)|6616 (SN…
		N	GO|GO.BP	GO:0023051	regulation of signaling	1.95581e-11	2.22884e-06	106	107 (ADCY1)|116 (ADCYAP1)|284 (ANGPT1)|367 (AR)|398 (ARHGDIG)|773 (CACNA1A)|793 (CALB1)|1114 (CHGB)|1141 (CHRNB2)|1268 (CNR1)|1392 (CRH)|1393 (CRHBP)|1395 (CRHR2)|1612 (DAPK1)|1745 (DLX1)|1749 (DLX5)|1759 (DNM1)|1813 (DRD2)|2048 (EPHB2)|2139 (EYA2)|2254 (FGF9)|2587 (GALR1)|2796 (GNRH1)|2903 (GRIN2A)|2904 (GRIN2B)|2906 (GRIN2D)|3084 (NRG1)|3623 (INHA)|3645 (INSRR)|3747 (KCNC2)|3925 (STMN1)|4293 (M…
		N	GO|GO.BP	GO:0048856	anatomical structure development	3.32816e-11	3.79277e-06	148	58 (ACTA1)|107 (ADCY1)|116 (ADCYAP1)|284 (ANGPT1)|367 (AR)|793 (CALB1)|1131 (CHRM3)|1141 (CHRNB2)|1268 (CNR1)|1292 (COL6A2)|1310 (COL19A1)|1381 (CRABP1)|1392 (CRH)|1400 (CRMP1)|1608 (DGKG)|1641 (DCX)|1745 (DLX1)|1749 (DLX5)|1813 (DRD2)|1832 (DSP)|2048 (EPHB2)|2139 (EYA2)|2254 (FGF9)|2566 (GABRG2)|2596 (GAP43)|2796 (GNRH1)|2903 (GRIN2A)|2904 (GRIN2B)|2906 (GRIN2D)|3084 (NRG1)|3623 (INHA)|3645 (INS…
		N	GO|GO.BP	GO:0032502	developmental process	3.805e-11	4.33618e-06	155	58 (ACTA1)|107 (ADCY1)|116 (ADCYAP1)|284 (ANGPT1)|367 (AR)|793 (CALB1)|1131 (CHRM3)|1141 (CHRNB2)|1268 (CNR1)|1292 (COL6A2)|1310 (COL19A1)|1381 (CRABP1)|1392 (CRH)|1400 (CRMP1)|1608 (DGKG)|1641 (DCX)|1745 (DLX1)|1749 (DLX5)|1813 (DRD2)|1832 (DSP)|2048 (EPHB2)|2139 (EYA2)|2254 (FGF9)|2566 (GABRG2)|2596 (GAP43)|2796 (GNRH1)|2903 (GRIN2A)|2904 (GRIN2B)|2906 (GRIN2D)|3084 (NRG1)|3623 (INHA)|3645 (INS…
		N	GO|GO.BP	GO:0032879	regulation of localization	4.41582e-11	5.03227e-06	88	107 (ADCY1)|116 (ADCYAP1)|284 (ANGPT1)|367 (AR)|398 (ARHGDIG)|773 (CACNA1A)|774 (CACNA1B)|781 (CACNA2D1)|1141 (CHRNB2)|1268 (CNR1)|1392 (CRH)|1393 (CRHBP)|1612 (DAPK1)|1759 (DNM1)|1813 (DRD2)|1832 (DSP)|2048 (EPHB2)|2254 (FGF9)|2587 (GALR1)|2796 (GNRH1)|3084 (NRG1)|3623 (INHA)|3747 (KCNC2)|3756 (KCNH1)|3762 (KCNJ5)|3788 (KCNS2)|3925 (STMN1)|4345 (CD200)|4804 (NGFR)|4923 (NTSR1)|4988 (OPRM1)|5063 …
		N	GO|GO.BP	GO:0006812	cation transport	4.682e-11	5.33561e-06	50	116 (ADCYAP1)|478 (ATP1A3)|534 (ATP6V1G2)|773 (CACNA1A)|774 (CACNA1B)|781 (CACNA2D1)|1141 (CHRNB2)|1268 (CNR1)|1392 (CRH)|1393 (CRHBP)|1612 (DAPK1)|1813 (DRD2)|2048 (EPHB2)|2903 (GRIN2A)|2904 (GRIN2B)|2906 (GRIN2D)|3747 (KCNC2)|3756 (KCNH1)|3762 (KCNJ5)|3788 (KCNS2)|4923 (NTSR1)|4988 (OPRM1)|5581 (PRKCE)|5865 (RAB3B)|5999 (RGS4)|6534 (SLC6A7)|6616 (SNAP25)|6833 (ABCC8)|6857 (SYT1)|6861 (SYT5)|722…
		N	GO|GO.BP	GO:0007417	central nervous system development	5.43184e-11	6.19012e-06	45	107 (ADCY1)|116 (ADCYAP1)|1141 (CHRNB2)|1392 (CRH)|1641 (DCX)|1745 (DLX1)|1749 (DLX5)|1813 (DRD2)|2048 (EPHB2)|2254 (FGF9)|2903 (GRIN2A)|2904 (GRIN2B)|2906 (GRIN2D)|3084 (NRG1)|3747 (KCNC2)|3925 (STMN1)|4808 (NHLH2)|5999 (RGS4)|6092 (ROBO2)|6664 (SOX11)|6857 (SYT1)|7161 (TP73)|7223 (TRPC4)|7545 (ZIC1)|7546 (ZIC2)|7704 (ZBTB16)|8851 (CDK5R1)|9118 (INA)|9143 (SYNGR3)|11023 (VAX1)|23543 (RBFOX2)|260…
		N	GO|GO.CC	GO:0034703	cation channel complex	5.46888e-11	6.23234e-06	21	773 (CACNA1A)|774 (CACNA1B)|781 (CACNA2D1)|2903 (GRIN2A)|2904 (GRIN2B)|2906 (GRIN2D)|3747 (KCNC2)|3756 (KCNH1)|3762 (KCNJ5)|3788 (KCNS2)|6616 (SNAP25)|6833 (ABCC8)|7223 (TRPC4)|9177 (HTR3B)|10021 (HCN4)|10369 (CACNG2)|26047 (CNTNAP2)|55800 (SCN3B)|80333 (KCNIP4)|170850 (KCNG3)|348980 (HCN1)
		N	GO|GO.BP	GO:0051046	regulation of secretion	6.0013e-11	6.83909e-06	40	107 (ADCY1)|116 (ADCYAP1)|284 (ANGPT1)|773 (CACNA1A)|1141 (CHRNB2)|1268 (CNR1)|1392 (CRH)|1393 (CRHBP)|1813 (DRD2)|2587 (GALR1)|3084 (NRG1)|3623 (INHA)|3747 (KCNC2)|4345 (CD200)|4923 (NTSR1)|4988 (OPRM1)|5581 (PRKCE)|5864 (RAB3A)|5865 (RAB3B)|6616 (SNAP25)|6664 (SOX11)|6812 (STXBP1)|6833 (ABCC8)|6855 (SYP)|6857 (SYT1)|6861 (SYT5)|7432 (VIP)|7442 (TRPV1)|7447 (VSNL1)|8447 (DOC2B)|8448 (DOC2A)|1081…
		N	GO|GO.MF	GO:0005244	voltage-gated ion channel activity	6.79131e-11	7.73938e-06	20	773 (CACNA1A)|774 (CACNA1B)|781 (CACNA2D1)|1268 (CNR1)|2903 (GRIN2A)|2904 (GRIN2B)|2906 (GRIN2D)|3747 (KCNC2)|3756 (KCNH1)|3762 (KCNJ5)|3788 (KCNS2)|4988 (OPRM1)|6616 (SNAP25)|6833 (ABCC8)|10021 (HCN4)|10369 (CACNG2)|55800 (SCN3B)|80333 (KCNIP4)|170850 (KCNG3)|348980 (HCN1)
		N	GO|GO.MF	GO:0022832	voltage-gated channel activity	6.79131e-11	7.73938e-06	20	773 (CACNA1A)|774 (CACNA1B)|781 (CACNA2D1)|1268 (CNR1)|2903 (GRIN2A)|2904 (GRIN2B)|2906 (GRIN2D)|3747 (KCNC2)|3756 (KCNH1)|3762 (KCNJ5)|3788 (KCNS2)|4988 (OPRM1)|6616 (SNAP25)|6833 (ABCC8)|10021 (HCN4)|10369 (CACNG2)|55800 (SCN3B)|80333 (KCNIP4)|170850 (KCNG3)|348980 (HCN1)
		N	GO|GO.MF	GO:0005261	cation channel activity	6.83655e-11	7.79093e-06	25	773 (CACNA1A)|774 (CACNA1B)|781 (CACNA2D1)|1141 (CHRNB2)|1268 (CNR1)|2903 (GRIN2A)|2904 (GRIN2B)|2906 (GRIN2D)|3747 (KCNC2)|3756 (KCNH1)|3762 (KCNJ5)|3788 (KCNS2)|4988 (OPRM1)|6616 (SNAP25)|6833 (ABCC8)|7223 (TRPC4)|7442 (TRPV1)|9177 (HTR3B)|10021 (HCN4)|10369 (CACNG2)|55503 (TRPV6)|55800 (SCN3B)|80333 (KCNIP4)|170850 (KCNG3)|348980 (HCN1)
		N	GO|GO.BP	GO:0030154	cell differentiation	7.29465e-11	8.31298e-06	115	58 (ACTA1)|107 (ADCY1)|116 (ADCYAP1)|284 (ANGPT1)|367 (AR)|1141 (CHRNB2)|1268 (CNR1)|1292 (COL6A2)|1310 (COL19A1)|1400 (CRMP1)|1608 (DGKG)|1641 (DCX)|1745 (DLX1)|1749 (DLX5)|1813 (DRD2)|1832 (DSP)|2048 (EPHB2)|2139 (EYA2)|2254 (FGF9)|2596 (GAP43)|2796 (GNRH1)|2903 (GRIN2A)|3084 (NRG1)|3623 (INHA)|3645 (INSRR)|3756 (KCNH1)|3800 (KIF5C)|3880 (KRT19)|3925 (STMN1)|4674 (NAP1L2)|4745 (NELL1)|4804 (NGF…
		N	GO|GO.BP	GO:0050767	regulation of neurogenesis	7.86214e-11	8.95969e-06	40	116 (ADCYAP1)|1141 (CHRNB2)|1268 (CNR1)|1400 (CRMP1)|1745 (DLX1)|1813 (DRD2)|2048 (EPHB2)|2796 (GNRH1)|3084 (NRG1)|4674 (NAP1L2)|4804 (NGFR)|4988 (OPRM1)|5063 (PAK3)|5121 (PCP4)|6092 (ROBO2)|6616 (SNAP25)|6664 (SOX11)|6833 (ABCC8)|6857 (SYT1)|7161 (TP73)|7532 (YWHAG)|8851 (CDK5R1)|9856 (KIAA0319)|9912 (ARHGAP44)|10439 (OLFM1)|11023 (VAX1)|11075 (STMN2)|22876 (INPP5F)|23025 (UNC13A)|23072 (HECW1)|…
		N	GO|GO.CC	GO:0098978	glutamatergic synapse	8.5417e-11	9.73413e-06	26	107 (ADCY1)|793 (CALB1)|1006 (CDH8)|1131 (CHRM3)|1268 (CNR1)|1759 (DNM1)|1813 (DRD2)|2048 (EPHB2)|2903 (GRIN2A)|3084 (NRG1)|5063 (PAK3)|5575 (PRKAR1B)|6616 (SNAP25)|6812 (STXBP1)|6857 (SYT1)|8224 (SYN3)|8927 (BSN)|9211 (LGI1)|9758 (FRMPD4)|9912 (ARHGAP44)|10369 (CACNG2)|10815 (CPLX1)|23025 (UNC13A)|23467 (NPTXR)|26059 (ERC2)|388662 (SLC6A17)
		N	GO|GO.BP	GO:1903530	regulation of secretion by cell	8.82826e-11	1.00607e-05	38	107 (ADCY1)|116 (ADCYAP1)|284 (ANGPT1)|773 (CACNA1A)|1141 (CHRNB2)|1268 (CNR1)|1392 (CRH)|1393 (CRHBP)|1813 (DRD2)|2587 (GALR1)|3623 (INHA)|3747 (KCNC2)|4345 (CD200)|4923 (NTSR1)|4988 (OPRM1)|5581 (PRKCE)|5864 (RAB3A)|5865 (RAB3B)|6616 (SNAP25)|6664 (SOX11)|6812 (STXBP1)|6833 (ABCC8)|6855 (SYP)|6857 (SYT1)|6861 (SYT5)|7432 (VIP)|7447 (VSNL1)|8447 (DOC2B)|8448 (DOC2A)|10815 (CPLX1)|23025 (UNC13A)|…
		N	GO|GO.CC	GO:1902495	transmembrane transporter complex	9.51959e-11	1.08485e-05	25	478 (ATP1A3)|773 (CACNA1A)|774 (CACNA1B)|781 (CACNA2D1)|1141 (CHRNB2)|2566 (GABRG2)|2742 (GLRA2)|2903 (GRIN2A)|2904 (GRIN2B)|2906 (GRIN2D)|3747 (KCNC2)|3756 (KCNH1)|3762 (KCNJ5)|3788 (KCNS2)|6616 (SNAP25)|6833 (ABCC8)|7223 (TRPC4)|9177 (HTR3B)|10021 (HCN4)|10369 (CACNG2)|26047 (CNTNAP2)|55800 (SCN3B)|80333 (KCNIP4)|170850 (KCNG3)|348980 (HCN1)
		N	GO|GO.BP	GO:0048812	neuron projection morphogenesis	9.93665e-11	1.13238e-05	35	107 (ADCY1)|1141 (CHRNB2)|1400 (CRMP1)|1749 (DLX5)|1813 (DRD2)|2048 (EPHB2)|2596 (GAP43)|3800 (KIF5C)|3925 (STMN1)|4804 (NGFR)|5063 (PAK3)|5864 (RAB3A)|6092 (ROBO2)|6812 (STXBP1)|6857 (SYT1)|8851 (CDK5R1)|9211 (LGI1)|9369 (NRXN3)|9912 (ARHGAP44)|10381 (TUBB3)|10439 (OLFM1)|11023 (VAX1)|23025 (UNC13A)|23072 (HECW1)|23543 (RBFOX2)|26039 (SS18L1)|26047 (CNTNAP2)|29993 (PACSIN1)|51062 (ATL1)|80128 (T…
		N	GO|GO.CC	GO:0030658	transport vesicle membrane	1.06451e-10	1.21312e-05	20	1813 (DRD2)|2572 (GAD2)|5864 (RAB3A)|5865 (RAB3B)|6833 (ABCC8)|6855 (SYP)|6857 (SYT1)|6861 (SYT5)|8224 (SYN3)|8448 (DOC2A)|9143 (SYNGR3)|9899 (SV2B)|22987 (SV2C)|23025 (UNC13A)|55530 (SVOP)|84258 (SYT3)|115827 (RAB3C)|132204 (SYNPR)|140679 (SLC32A1)|388662 (SLC6A17)
		N	GO|GO.CC	GO:0034702	ion channel complex	1.09404e-10	1.24677e-05	24	773 (CACNA1A)|774 (CACNA1B)|781 (CACNA2D1)|1141 (CHRNB2)|2566 (GABRG2)|2742 (GLRA2)|2903 (GRIN2A)|2904 (GRIN2B)|2906 (GRIN2D)|3747 (KCNC2)|3756 (KCNH1)|3762 (KCNJ5)|3788 (KCNS2)|6616 (SNAP25)|6833 (ABCC8)|7223 (TRPC4)|9177 (HTR3B)|10021 (HCN4)|10369 (CACNG2)|26047 (CNTNAP2)|55800 (SCN3B)|80333 (KCNIP4)|170850 (KCNG3)|348980 (HCN1)
		N	GO|GO.CC	GO:1990351	transporter complex	1.59561e-10	1.81835e-05	25	478 (ATP1A3)|773 (CACNA1A)|774 (CACNA1B)|781 (CACNA2D1)|1141 (CHRNB2)|2566 (GABRG2)|2742 (GLRA2)|2903 (GRIN2A)|2904 (GRIN2B)|2906 (GRIN2D)|3747 (KCNC2)|3756 (KCNH1)|3762 (KCNJ5)|3788 (KCNS2)|6616 (SNAP25)|6833 (ABCC8)|7223 (TRPC4)|9177 (HTR3B)|10021 (HCN4)|10369 (CACNG2)|26047 (CNTNAP2)|55800 (SCN3B)|80333 (KCNIP4)|170850 (KCNG3)|348980 (HCN1)
		N	GO|GO.CC	GO:0005887	integral component of plasma membrane	1.71266e-10	1.95174e-05	61	107 (ADCY1)|478 (ATP1A3)|1131 (CHRM3)|1141 (CHRNB2)|1268 (CNR1)|1395 (CRHR2)|1813 (DRD2)|2048 (EPHB2)|2566 (GABRG2)|2587 (GALR1)|2742 (GLRA2)|2834 (PRLHR)|2835 (GPR12)|2903 (GRIN2A)|2904 (GRIN2B)|2906 (GRIN2D)|3038 (HAS3)|3084 (NRG1)|3645 (INSRR)|3747 (KCNC2)|3756 (KCNH1)|3762 (KCNJ5)|3788 (KCNS2)|4345 (CD200)|4804 (NGFR)|4886 (NPY1R)|4923 (NTSR1)|4988 (OPRM1)|6519 (SLC3A1)|6534 (SLC6A7)|6616 (SN…
		N	GO|GO.BP	GO:0060284	regulation of cell development	1.76137e-10	2.00725e-05	43	116 (ADCYAP1)|1141 (CHRNB2)|1268 (CNR1)|1400 (CRMP1)|1745 (DLX1)|1813 (DRD2)|2048 (EPHB2)|2796 (GNRH1)|3084 (NRG1)|4674 (NAP1L2)|4804 (NGFR)|4880 (NPPC)|4988 (OPRM1)|5063 (PAK3)|5121 (PCP4)|5999 (RGS4)|6092 (ROBO2)|6616 (SNAP25)|6664 (SOX11)|6833 (ABCC8)|6857 (SYT1)|7161 (TP73)|7442 (TRPV1)|7532 (YWHAG)|8851 (CDK5R1)|9856 (KIAA0319)|9912 (ARHGAP44)|10439 (OLFM1)|11023 (VAX1)|11075 (STMN2)|22876 (…
		N	GO|GO.BP	GO:0120039	plasma membrane bounded cell projection morphogenesis	1.81628e-10	2.06983e-05	35	107 (ADCY1)|1141 (CHRNB2)|1400 (CRMP1)|1749 (DLX5)|1813 (DRD2)|2048 (EPHB2)|2596 (GAP43)|3800 (KIF5C)|3925 (STMN1)|4804 (NGFR)|5063 (PAK3)|5864 (RAB3A)|6092 (ROBO2)|6812 (STXBP1)|6857 (SYT1)|8851 (CDK5R1)|9211 (LGI1)|9369 (NRXN3)|9912 (ARHGAP44)|10381 (TUBB3)|10439 (OLFM1)|11023 (VAX1)|23025 (UNC13A)|23072 (HECW1)|23543 (RBFOX2)|26039 (SS18L1)|26047 (CNTNAP2)|29993 (PACSIN1)|51062 (ATL1)|80128 (T…
		N	GO|GO.BP	GO:0048858	cell projection morphogenesis	1.89491e-10	2.15944e-05	35	107 (ADCY1)|1141 (CHRNB2)|1400 (CRMP1)|1749 (DLX5)|1813 (DRD2)|2048 (EPHB2)|2596 (GAP43)|3800 (KIF5C)|3925 (STMN1)|4804 (NGFR)|5063 (PAK3)|5864 (RAB3A)|6092 (ROBO2)|6812 (STXBP1)|6857 (SYT1)|8851 (CDK5R1)|9211 (LGI1)|9369 (NRXN3)|9912 (ARHGAP44)|10381 (TUBB3)|10439 (OLFM1)|11023 (VAX1)|23025 (UNC13A)|23072 (HECW1)|23543 (RBFOX2)|26039 (SS18L1)|26047 (CNTNAP2)|29993 (PACSIN1)|51062 (ATL1)|80128 (T…
		N	GO|GO.BP	GO:0045471	response to ethanol	1.96254e-10	2.23651e-05	16	116 (ADCYAP1)|1141 (CHRNB2)|1268 (CNR1)|1392 (CRH)|1393 (CRHBP)|1813 (DRD2)|2742 (GLRA2)|2796 (GNRH1)|2903 (GRIN2A)|2904 (GRIN2B)|3747 (KCNC2)|4880 (NPPC)|4988 (OPRM1)|5179 (PENK)|5581 (PRKCE)|5999 (RGS4)
		N	GO|GO.CC	GO:0030425	dendrite	2.20712e-10	2.51524e-05	34	774 (CACNA1B)|793 (CALB1)|1131 (CHRM3)|1393 (CRHBP)|1395 (CRHR2)|1759 (DNM1)|1813 (DRD2)|2048 (EPHB2)|2566 (GABRG2)|2796 (GNRH1)|3747 (KCNC2)|3756 (KCNH1)|3800 (KIF5C)|4923 (NTSR1)|4988 (OPRM1)|5179 (PENK)|5599 (MAPK8)|7442 (TRPV1)|8851 (CDK5R1)|8927 (BSN)|9758 (FRMPD4)|9912 (ARHGAP44)|10381 (TUBB3)|10815 (CPLX1)|22876 (INPP5F)|23467 (NPTXR)|26047 (CNTNAP2)|51617 (NSG2)|57692 (MAGEE1)|85397 (RGS8…
		N	GO|GO.BP	GO:0051960	regulation of nervous system development	2.40271e-10	2.73813e-05	42	116 (ADCYAP1)|1141 (CHRNB2)|1268 (CNR1)|1400 (CRMP1)|1745 (DLX1)|1813 (DRD2)|2048 (EPHB2)|2596 (GAP43)|2796 (GNRH1)|3084 (NRG1)|4674 (NAP1L2)|4804 (NGFR)|4988 (OPRM1)|5063 (PAK3)|5121 (PCP4)|6092 (ROBO2)|6616 (SNAP25)|6664 (SOX11)|6833 (ABCC8)|6857 (SYT1)|7161 (TP73)|7532 (YWHAG)|8851 (CDK5R1)|9856 (KIAA0319)|9912 (ARHGAP44)|10439 (OLFM1)|11023 (VAX1)|11075 (STMN2)|22876 (INPP5F)|23025 (UNC13A)|2…
		N	GO|GO.CC	GO:0097447	dendritic tree	2.40657e-10	2.74253e-05	34	774 (CACNA1B)|793 (CALB1)|1131 (CHRM3)|1393 (CRHBP)|1395 (CRHR2)|1759 (DNM1)|1813 (DRD2)|2048 (EPHB2)|2566 (GABRG2)|2796 (GNRH1)|3747 (KCNC2)|3756 (KCNH1)|3800 (KIF5C)|4923 (NTSR1)|4988 (OPRM1)|5179 (PENK)|5599 (MAPK8)|7442 (TRPV1)|8851 (CDK5R1)|8927 (BSN)|9758 (FRMPD4)|9912 (ARHGAP44)|10381 (TUBB3)|10815 (CPLX1)|22876 (INPP5F)|23467 (NPTXR)|26047 (CNTNAP2)|51617 (NSG2)|57692 (MAGEE1)|85397 (RGS8…
		N	GO|GO.MF	GO:0022839	ion gated channel activity	2.80031e-10	3.19123e-05	25	773 (CACNA1A)|774 (CACNA1B)|781 (CACNA2D1)|1141 (CHRNB2)|1268 (CNR1)|2566 (GABRG2)|2742 (GLRA2)|2903 (GRIN2A)|2904 (GRIN2B)|2906 (GRIN2D)|3747 (KCNC2)|3756 (KCNH1)|3762 (KCNJ5)|3788 (KCNS2)|4988 (OPRM1)|6616 (SNAP25)|6833 (ABCC8)|7442 (TRPV1)|9177 (HTR3B)|10021 (HCN4)|10369 (CACNG2)|55800 (SCN3B)|80333 (KCNIP4)|170850 (KCNG3)|348980 (HCN1)
		N	GO|GO.BP	GO:0007420	brain development	3.10837e-10	3.54229e-05	37	107 (ADCY1)|116 (ADCYAP1)|1141 (CHRNB2)|1392 (CRH)|1745 (DLX1)|1749 (DLX5)|1813 (DRD2)|2048 (EPHB2)|2254 (FGF9)|2903 (GRIN2A)|2904 (GRIN2B)|2906 (GRIN2D)|3084 (NRG1)|3747 (KCNC2)|3925 (STMN1)|5999 (RGS4)|6092 (ROBO2)|6857 (SYT1)|7545 (ZIC1)|7546 (ZIC2)|8851 (CDK5R1)|9118 (INA)|9143 (SYNGR3)|11023 (VAX1)|23543 (RBFOX2)|26047 (CNTNAP2)|26468 (LHX6)|50937 (CDON)|56934 (CA10)|57045 (TWSG1)|63974 (NEU…
		N	GO|GO.BP	GO:0098693	regulation of synaptic vesicle cycle	3.9197e-10	4.46689e-05	15	107 (ADCY1)|1141 (CHRNB2)|1268 (CNR1)|1759 (DNM1)|1813 (DRD2)|5575 (PRKAR1B)|5864 (RAB3A)|5865 (RAB3B)|6812 (STXBP1)|6855 (SYP)|6857 (SYT1)|8851 (CDK5R1)|8927 (BSN)|10815 (CPLX1)|63908 (NAPB)
		N	GO|GO.BP	GO:0032990	cell part morphogenesis	4.16738e-10	4.74915e-05	35	107 (ADCY1)|1141 (CHRNB2)|1400 (CRMP1)|1749 (DLX5)|1813 (DRD2)|2048 (EPHB2)|2596 (GAP43)|3800 (KIF5C)|3925 (STMN1)|4804 (NGFR)|5063 (PAK3)|5864 (RAB3A)|6092 (ROBO2)|6812 (STXBP1)|6857 (SYT1)|8851 (CDK5R1)|9211 (LGI1)|9369 (NRXN3)|9912 (ARHGAP44)|10381 (TUBB3)|10439 (OLFM1)|11023 (VAX1)|23025 (UNC13A)|23072 (HECW1)|23543 (RBFOX2)|26039 (SS18L1)|26047 (CNTNAP2)|29993 (PACSIN1)|51062 (ATL1)|80128 (T…
		N	GO|GO.BP	GO:0032501	multicellular organismal process	4.49099e-10	5.11794e-05	174	58 (ACTA1)|107 (ADCY1)|116 (ADCYAP1)|284 (ANGPT1)|367 (AR)|478 (ATP1A3)|774 (CACNA1B)|781 (CACNA2D1)|793 (CALB1)|1131 (CHRM3)|1141 (CHRNB2)|1268 (CNR1)|1292 (COL6A2)|1310 (COL19A1)|1381 (CRABP1)|1392 (CRH)|1393 (CRHBP)|1400 (CRMP1)|1608 (DGKG)|1641 (DCX)|1745 (DLX1)|1749 (DLX5)|1813 (DRD2)|1832 (DSP)|2048 (EPHB2)|2139 (EYA2)|2254 (FGF9)|2566 (GABRG2)|2587 (GALR1)|2596 (GAP43)|2742 (GLRA2)|2796 (G…
		N	GO|GO.MF	GO:0022836	gated channel activity	4.82376e-10	5.49716e-05	25	773 (CACNA1A)|774 (CACNA1B)|781 (CACNA2D1)|1141 (CHRNB2)|1268 (CNR1)|2566 (GABRG2)|2742 (GLRA2)|2903 (GRIN2A)|2904 (GRIN2B)|2906 (GRIN2D)|3747 (KCNC2)|3756 (KCNH1)|3762 (KCNJ5)|3788 (KCNS2)|4988 (OPRM1)|6616 (SNAP25)|6833 (ABCC8)|7442 (TRPV1)|9177 (HTR3B)|10021 (HCN4)|10369 (CACNG2)|55800 (SCN3B)|80333 (KCNIP4)|170850 (KCNG3)|348980 (HCN1)
		N	GO|GO.BP	GO:0043269	regulation of ion transport	5.10092e-10	5.81301e-05	35	116 (ADCYAP1)|773 (CACNA1A)|774 (CACNA1B)|781 (CACNA2D1)|1141 (CHRNB2)|1268 (CNR1)|1392 (CRH)|1393 (CRHBP)|1612 (DAPK1)|1813 (DRD2)|2048 (EPHB2)|3747 (KCNC2)|3756 (KCNH1)|3762 (KCNJ5)|3788 (KCNS2)|4923 (NTSR1)|4988 (OPRM1)|5581 (PRKCE)|5865 (RAB3B)|5999 (RGS4)|6812 (STXBP1)|6833 (ABCC8)|6857 (SYT1)|6861 (SYT5)|7432 (VIP)|10021 (HCN4)|10369 (CACNG2)|23072 (HECW1)|55800 (SCN3B)|57586 (SYT13)|80333 …
		N	GO|GO.MF	GO:0046873	metal ion transmembrane transporter activity	6.85955e-10	7.81714e-05	28	478 (ATP1A3)|773 (CACNA1A)|774 (CACNA1B)|781 (CACNA2D1)|1268 (CNR1)|2903 (GRIN2A)|2904 (GRIN2B)|2906 (GRIN2D)|3747 (KCNC2)|3756 (KCNH1)|3762 (KCNJ5)|3788 (KCNS2)|4988 (OPRM1)|6534 (SLC6A7)|6616 (SNAP25)|6833 (ABCC8)|7223 (TRPC4)|7442 (TRPV1)|10021 (HCN4)|10369 (CACNG2)|55503 (TRPV6)|55800 (SCN3B)|57468 (SLC12A5)|80333 (KCNIP4)|170850 (KCNG3)|201780 (SLC10A4)|348980 (HCN1)|388662 (SLC6A17)
		N	GO|GO.BP	GO:0051648	vesicle localization	8.62652e-10	9.83078e-05	23	107 (ADCY1)|1141 (CHRNB2)|1268 (CNR1)|1759 (DNM1)|1780 (DYNC1I1)|1813 (DRD2)|3800 (KIF5C)|5864 (RAB3A)|6616 (SNAP25)|6812 (STXBP1)|6855 (SYP)|6857 (SYT1)|6861 (SYT5)|8224 (SYN3)|8447 (DOC2B)|8448 (DOC2A)|10815 (CPLX1)|23025 (UNC13A)|26059 (ERC2)|57586 (SYT13)|63908 (NAPB)|80128 (TRIM46)|84258 (SYT3)
		N	GO|GO.CC	GO:0030054	cell junction	8.68997e-10	9.90309e-05	51	1005 (CDH7)|1006 (CDH8)|1131 (CHRM3)|1141 (CHRNB2)|1832 (DSP)|2566 (GABRG2)|2572 (GAD2)|2596 (GAP43)|2742 (GLRA2)|2903 (GRIN2A)|2904 (GRIN2B)|2906 (GRIN2D)|3747 (KCNC2)|3756 (KCNH1)|4988 (OPRM1)|6616 (SNAP25)|6855 (SYP)|6857 (SYT1)|6861 (SYT5)|7161 (TP73)|7223 (TRPC4)|7442 (TRPV1)|7532 (YWHAG)|8224 (SYN3)|8448 (DOC2A)|8927 (BSN)|9143 (SYNGR3)|9211 (LGI1)|9228 (DLGAP2)|9899 (SV2B)|9912 (ARHGAP44)|…
		N	GO|GO.BP	GO:0017158	regulation of calcium ion-dependent exocytosis	1.11807e-09	0.000127415	14	107 (ADCY1)|1141 (CHRNB2)|1268 (CNR1)|1813 (DRD2)|5864 (RAB3A)|6812 (STXBP1)|6855 (SYP)|6857 (SYT1)|6861 (SYT5)|8447 (DOC2B)|8448 (DOC2A)|10815 (CPLX1)|55503 (TRPV6)|63908 (NAPB)
		N	GO|GO.BP	GO:0048869	cellular developmental process	1.12742e-09	0.000128481	115	58 (ACTA1)|107 (ADCY1)|116 (ADCYAP1)|284 (ANGPT1)|367 (AR)|1141 (CHRNB2)|1268 (CNR1)|1292 (COL6A2)|1310 (COL19A1)|1400 (CRMP1)|1608 (DGKG)|1641 (DCX)|1745 (DLX1)|1749 (DLX5)|1813 (DRD2)|1832 (DSP)|2048 (EPHB2)|2139 (EYA2)|2254 (FGF9)|2596 (GAP43)|2796 (GNRH1)|2903 (GRIN2A)|3084 (NRG1)|3623 (INHA)|3645 (INSRR)|3756 (KCNH1)|3800 (KIF5C)|3880 (KRT19)|3925 (STMN1)|4674 (NAP1L2)|4745 (NELL1)|4804 (NGF…
		N	GO|GO.MF	GO:0019905	syntaxin binding	1.20045e-09	0.000136803	12	773 (CACNA1A)|1612 (DAPK1)|6616 (SNAP25)|6812 (STXBP1)|6857 (SYT1)|6861 (SYT5)|8447 (DOC2B)|10815 (CPLX1)|23025 (UNC13A)|57586 (SYT13)|63908 (NAPB)|84258 (SYT3)
		N	GO|GO.MF	GO:0005216	ion channel activity	1.32302e-09	0.000150771	27	773 (CACNA1A)|774 (CACNA1B)|781 (CACNA2D1)|1141 (CHRNB2)|1268 (CNR1)|2566 (GABRG2)|2742 (GLRA2)|2903 (GRIN2A)|2904 (GRIN2B)|2906 (GRIN2D)|3747 (KCNC2)|3756 (KCNH1)|3762 (KCNJ5)|3788 (KCNS2)|4988 (OPRM1)|6616 (SNAP25)|6833 (ABCC8)|7223 (TRPC4)|7442 (TRPV1)|9177 (HTR3B)|10021 (HCN4)|10369 (CACNG2)|55503 (TRPV6)|55800 (SCN3B)|80333 (KCNIP4)|170850 (KCNG3)|348980 (HCN1)
		N	GO|GO.CC	GO:0098984	neuron to neuron synapse	1.46073e-09	0.000166465	24	107 (ADCY1)|793 (CALB1)|1131 (CHRM3)|1759 (DNM1)|1813 (DRD2)|2596 (GAP43)|2903 (GRIN2A)|2904 (GRIN2B)|2906 (GRIN2D)|3756 (KCNH1)|4923 (NTSR1)|5063 (PAK3)|5179 (PENK)|5575 (PRKAR1B)|6857 (SYT1)|8224 (SYN3)|8851 (CDK5R1)|8927 (BSN)|9228 (DLGAP2)|9758 (FRMPD4)|9829 (DNAJC6)|9912 (ARHGAP44)|10369 (CACNG2)|23623 (RUSC1)
		N	GO|GO.BP	GO:0060322	head development	1.60299e-09	0.000182676	37	107 (ADCY1)|116 (ADCYAP1)|1141 (CHRNB2)|1392 (CRH)|1745 (DLX1)|1749 (DLX5)|1813 (DRD2)|2048 (EPHB2)|2254 (FGF9)|2903 (GRIN2A)|2904 (GRIN2B)|2906 (GRIN2D)|3084 (NRG1)|3747 (KCNC2)|3925 (STMN1)|5999 (RGS4)|6092 (ROBO2)|6857 (SYT1)|7545 (ZIC1)|7546 (ZIC2)|8851 (CDK5R1)|9118 (INA)|9143 (SYNGR3)|11023 (VAX1)|23543 (RBFOX2)|26047 (CNTNAP2)|26468 (LHX6)|50937 (CDON)|56934 (CA10)|57045 (TWSG1)|63974 (NEU…
		N	GO|GO.BP	GO:0051650	establishment of vesicle localization	1.70583e-09	0.000194396	22	107 (ADCY1)|1141 (CHRNB2)|1268 (CNR1)|1759 (DNM1)|1780 (DYNC1I1)|1813 (DRD2)|3800 (KIF5C)|5864 (RAB3A)|6616 (SNAP25)|6812 (STXBP1)|6855 (SYP)|6857 (SYT1)|6861 (SYT5)|8447 (DOC2B)|8448 (DOC2A)|10815 (CPLX1)|23025 (UNC13A)|26059 (ERC2)|57586 (SYT13)|63908 (NAPB)|80128 (TRIM46)|84258 (SYT3)
		N	GO|GO.MF	GO:0015267	channel activity	2.11975e-09	0.000241567	28	773 (CACNA1A)|774 (CACNA1B)|781 (CACNA2D1)|1141 (CHRNB2)|1268 (CNR1)|2566 (GABRG2)|2742 (GLRA2)|2903 (GRIN2A)|2904 (GRIN2B)|2906 (GRIN2D)|3747 (KCNC2)|3756 (KCNH1)|3762 (KCNJ5)|3788 (KCNS2)|4988 (OPRM1)|6616 (SNAP25)|6833 (ABCC8)|7223 (TRPC4)|7442 (TRPV1)|9177 (HTR3B)|10021 (HCN4)|10369 (CACNG2)|55503 (TRPV6)|55800 (SCN3B)|57369 (GJD2)|80333 (KCNIP4)|170850 (KCNG3)|348980 (HCN1)
		N	GO|GO.MF	GO:0022803	passive transmembrane transporter activity	2.22256e-09	0.000253283	28	773 (CACNA1A)|774 (CACNA1B)|781 (CACNA2D1)|1141 (CHRNB2)|1268 (CNR1)|2566 (GABRG2)|2742 (GLRA2)|2903 (GRIN2A)|2904 (GRIN2B)|2906 (GRIN2D)|3747 (KCNC2)|3756 (KCNH1)|3762 (KCNJ5)|3788 (KCNS2)|4988 (OPRM1)|6616 (SNAP25)|6833 (ABCC8)|7223 (TRPC4)|7442 (TRPV1)|9177 (HTR3B)|10021 (HCN4)|10369 (CACNG2)|55503 (TRPV6)|55800 (SCN3B)|57369 (GJD2)|80333 (KCNIP4)|170850 (KCNG3)|348980 (HCN1)
		N	GO|GO.CC	GO:0098982	GABA-ergic synapse	2.314e-09	0.000263703	12	793 (CALB1)|1268 (CNR1)|1813 (DRD2)|2566 (GABRG2)|2596 (GAP43)|3084 (NRG1)|8927 (BSN)|26059 (ERC2)|53942 (CNTN5)|140679 (SLC32A1)|266727 (MDGA1)|388662 (SLC6A17)
		N	GO|GO.BP	GO:0006811	ion transport	2.36424e-09	0.000269429	59	116 (ADCYAP1)|478 (ATP1A3)|534 (ATP6V1G2)|773 (CACNA1A)|774 (CACNA1B)|781 (CACNA2D1)|1141 (CHRNB2)|1268 (CNR1)|1392 (CRH)|1393 (CRHBP)|1612 (DAPK1)|1813 (DRD2)|2048 (EPHB2)|2170 (FABP3)|2566 (GABRG2)|2742 (GLRA2)|2903 (GRIN2A)|2904 (GRIN2B)|2906 (GRIN2D)|3747 (KCNC2)|3756 (KCNH1)|3762 (KCNJ5)|3788 (KCNS2)|4923 (NTSR1)|4988 (OPRM1)|5581 (PRKCE)|5864 (RAB3A)|5865 (RAB3B)|5999 (RGS4)|6519 (SLC3A1)|6…
		N	GO|GO.BP	GO:0045664	regulation of neuron differentiation	2.52371e-09	0.000287602	33	116 (ADCYAP1)|1141 (CHRNB2)|1268 (CNR1)|1400 (CRMP1)|1745 (DLX1)|2048 (EPHB2)|4674 (NAP1L2)|4804 (NGFR)|5063 (PAK3)|5121 (PCP4)|6092 (ROBO2)|6616 (SNAP25)|6664 (SOX11)|6857 (SYT1)|7161 (TP73)|7532 (YWHAG)|8851 (CDK5R1)|9856 (KIAA0319)|9912 (ARHGAP44)|10439 (OLFM1)|11075 (STMN2)|22876 (INPP5F)|23025 (UNC13A)|23072 (HECW1)|26039 (SS18L1)|29993 (PACSIN1)|50937 (CDON)|65009 (NDRG4)|80128 (TRIM46)|842…
		N	GO|GO.MF	GO:0022838	substrate-specific channel activity	2.79006e-09	0.000317955	27	773 (CACNA1A)|774 (CACNA1B)|781 (CACNA2D1)|1141 (CHRNB2)|1268 (CNR1)|2566 (GABRG2)|2742 (GLRA2)|2903 (GRIN2A)|2904 (GRIN2B)|2906 (GRIN2D)|3747 (KCNC2)|3756 (KCNH1)|3762 (KCNJ5)|3788 (KCNS2)|4988 (OPRM1)|6616 (SNAP25)|6833 (ABCC8)|7223 (TRPC4)|7442 (TRPV1)|9177 (HTR3B)|10021 (HCN4)|10369 (CACNG2)|55503 (TRPV6)|55800 (SCN3B)|80333 (KCNIP4)|170850 (KCNG3)|348980 (HCN1)
		N	GO|GO.MF	GO:0022890	inorganic cation transmembrane transporter activity	2.90942e-09	0.000331558	32	478 (ATP1A3)|773 (CACNA1A)|774 (CACNA1B)|781 (CACNA2D1)|1141 (CHRNB2)|1268 (CNR1)|2903 (GRIN2A)|2904 (GRIN2B)|2906 (GRIN2D)|3747 (KCNC2)|3756 (KCNH1)|3762 (KCNJ5)|3788 (KCNS2)|4988 (OPRM1)|6534 (SLC6A7)|6616 (SNAP25)|6833 (ABCC8)|7223 (TRPC4)|7442 (TRPV1)|9177 (HTR3B)|10021 (HCN4)|10369 (CACNG2)|55503 (TRPV6)|55800 (SCN3B)|57468 (SLC12A5)|80333 (KCNIP4)|114134 (SLC2A13)|140679 (SLC32A1)|170850 (K…
		N	GO|GO.BP	GO:0007611	learning or memory	3.12482e-09	0.000356104	20	107 (ADCY1)|793 (CALB1)|1141 (CHRNB2)|1268 (CNR1)|1392 (CRH)|1393 (CRHBP)|1813 (DRD2)|2048 (EPHB2)|2903 (GRIN2A)|2904 (GRIN2B)|4923 (NTSR1)|5575 (PRKAR1B)|6616 (SNAP25)|6833 (ABCC8)|7432 (VIP)|9369 (NRXN3)|26047 (CNTNAP2)|57468 (SLC12A5)|65009 (NDRG4)|100528062 (ARMCX5-GPRASP2)
		N	GO|GO.BP	GO:0051952	regulation of amine transport	3.15781e-09	0.000359864	13	1141 (CHRNB2)|1268 (CNR1)|1392 (CRH)|1813 (DRD2)|4923 (NTSR1)|5865 (RAB3B)|5999 (RGS4)|6812 (STXBP1)|6857 (SYT1)|6861 (SYT5)|7432 (VIP)|57586 (SYT13)|84258 (SYT3)
		N	GO|GO.BP	GO:0042493	response to drug	3.32068e-09	0.000378424	43	107 (ADCY1)|116 (ADCYAP1)|1131 (CHRM3)|1141 (CHRNB2)|1268 (CNR1)|1392 (CRH)|1393 (CRHBP)|1813 (DRD2)|2170 (FABP3)|2571 (GAD1)|2572 (GAD2)|2587 (GALR1)|2742 (GLRA2)|2796 (GNRH1)|2903 (GRIN2A)|2904 (GRIN2B)|3747 (KCNC2)|4880 (NPPC)|4923 (NTSR1)|4988 (OPRM1)|5179 (PENK)|5228 (PGF)|5581 (PRKCE)|5865 (RAB3B)|5999 (RGS4)|6750 (SST)|6833 (ABCC8)|6857 (SYT1)|6861 (SYT5)|7161 (TP73)|7442 (TRPV1)|8851 (CDK…
		N	GO|GO.BP	GO:0098655	cation transmembrane transport	4.80767e-09	0.000547882	38	478 (ATP1A3)|534 (ATP6V1G2)|773 (CACNA1A)|774 (CACNA1B)|781 (CACNA2D1)|1392 (CRH)|1393 (CRHBP)|1612 (DAPK1)|1813 (DRD2)|2048 (EPHB2)|2903 (GRIN2A)|2904 (GRIN2B)|2906 (GRIN2D)|3747 (KCNC2)|3756 (KCNH1)|3762 (KCNJ5)|3788 (KCNS2)|4923 (NTSR1)|4988 (OPRM1)|5581 (PRKCE)|5999 (RGS4)|6534 (SLC6A7)|6616 (SNAP25)|6833 (ABCC8)|7223 (TRPC4)|7442 (TRPV1)|9481 (SLC25A27)|10021 (HCN4)|10369 (CACNG2)|23072 (HEC…
		N	GO|GO.BP	GO:0017157	regulation of exocytosis	5.05e-09	0.000575498	18	107 (ADCY1)|1141 (CHRNB2)|1268 (CNR1)|1813 (DRD2)|5864 (RAB3A)|5865 (RAB3B)|6812 (STXBP1)|6855 (SYP)|6857 (SYT1)|6861 (SYT5)|7447 (VSNL1)|8447 (DOC2B)|8448 (DOC2A)|10815 (CPLX1)|55503 (TRPV6)|55512 (SMPD3)|63908 (NAPB)|115827 (RAB3C)
		N	GO|GO.BP	GO:0050794	regulation of cellular process	6.37831e-09	0.000726872	223	107 (ADCY1)|116 (ADCYAP1)|284 (ANGPT1)|367 (AR)|398 (ARHGDIG)|534 (ATP6V1G2)|773 (CACNA1A)|793 (CALB1)|1006 (CDH8)|1114 (CHGB)|1131 (CHRM3)|1141 (CHRNB2)|1268 (CNR1)|1381 (CRABP1)|1392 (CRH)|1393 (CRHBP)|1395 (CRHR2)|1400 (CRMP1)|1608 (DGKG)|1612 (DAPK1)|1641 (DCX)|1745 (DLX1)|1749 (DLX5)|1759 (DNM1)|1813 (DRD2)|1832 (DSP)|2048 (EPHB2)|2139 (EYA2)|2170 (FABP3)|2254 (FGF9)|2566 (GABRG2)|2587 (GALR…
		N	GO|GO.BP	GO:0050890	cognition	6.76678e-09	0.000771142	21	107 (ADCY1)|793 (CALB1)|1141 (CHRNB2)|1268 (CNR1)|1392 (CRH)|1393 (CRHBP)|1813 (DRD2)|2048 (EPHB2)|2903 (GRIN2A)|2904 (GRIN2B)|4923 (NTSR1)|5575 (PRKAR1B)|6616 (SNAP25)|6833 (ABCC8)|7432 (VIP)|9369 (NRXN3)|26047 (CNTNAP2)|57468 (SLC12A5)|65009 (NDRG4)|139411 (PTCHD1)|100528062 (ARMCX5-GPRASP2)
		N	GO|GO.BP	GO:0023056	positive regulation of signaling	7.14023e-09	0.000813701	61	116 (ADCYAP1)|284 (ANGPT1)|367 (AR)|793 (CALB1)|1141 (CHRNB2)|1268 (CNR1)|1392 (CRH)|1395 (CRHR2)|1749 (DLX5)|1813 (DRD2)|2048 (EPHB2)|2254 (FGF9)|2587 (GALR1)|2903 (GRIN2A)|2904 (GRIN2B)|2906 (GRIN2D)|3084 (NRG1)|3623 (INHA)|3645 (INSRR)|4293 (MAP3K9)|4880 (NPPC)|4923 (NTSR1)|4988 (OPRM1)|5063 (PAK3)|5581 (PRKCE)|5599 (MAPK8)|5865 (RAB3B)|5999 (RGS4)|6092 (ROBO2)|6616 (SNAP25)|6664 (SOX11)|6812 …
		N	GO|GO.BP	GO:0048667	cell morphogenesis involved in neuron differentiation	7.23574e-09	0.000824585	30	107 (ADCY1)|1141 (CHRNB2)|1400 (CRMP1)|1749 (DLX5)|1813 (DRD2)|2048 (EPHB2)|2596 (GAP43)|3800 (KIF5C)|3925 (STMN1)|4804 (NGFR)|5063 (PAK3)|5864 (RAB3A)|6092 (ROBO2)|6812 (STXBP1)|8851 (CDK5R1)|9211 (LGI1)|9369 (NRXN3)|9912 (ARHGAP44)|10381 (TUBB3)|10439 (OLFM1)|11023 (VAX1)|23072 (HECW1)|23543 (RBFOX2)|26039 (SS18L1)|51062 (ATL1)|80128 (TRIM46)|84570 (COL25A1)|137970 (UNC5D)|494470 (RNF165)|10052…
		N	GO|GO.BP	GO:0015837	amine transport	7.74241e-09	0.000882326	13	1141 (CHRNB2)|1268 (CNR1)|1392 (CRH)|1813 (DRD2)|4923 (NTSR1)|5865 (RAB3B)|5999 (RGS4)|6812 (STXBP1)|6857 (SYT1)|6861 (SYT5)|7432 (VIP)|57586 (SYT13)|84258 (SYT3)
		N	GO|GO.BP	GO:0051588	regulation of neurotransmitter transport	7.81623e-09	0.000890738	15	107 (ADCY1)|1141 (CHRNB2)|1268 (CNR1)|1392 (CRH)|1813 (DRD2)|4923 (NTSR1)|5864 (RAB3A)|5865 (RAB3B)|5999 (RGS4)|6812 (STXBP1)|6855 (SYP)|6857 (SYT1)|10815 (CPLX1)|23025 (UNC13A)|63908 (NAPB)
		N	GO|GO.BP	GO:0019233	sensory perception of pain	8.74767e-09	0.000996884	13	116 (ADCYAP1)|1141 (CHRNB2)|1268 (CNR1)|2903 (GRIN2A)|2906 (GRIN2D)|4886 (NPY1R)|4923 (NTSR1)|4988 (OPRM1)|5179 (PENK)|7432 (VIP)|7442 (TRPV1)|55800 (SCN3B)|59344 (ALOXE3)
		N	GO|GO.CC	GO:0098797	plasma membrane protein complex	9.99544e-09	0.00113908	30	478 (ATP1A3)|773 (CACNA1A)|774 (CACNA1B)|781 (CACNA2D1)|1005 (CDH7)|1006 (CDH8)|1141 (CHRNB2)|2903 (GRIN2A)|2904 (GRIN2B)|2906 (GRIN2D)|3623 (INHA)|3645 (INSRR)|3747 (KCNC2)|3756 (KCNH1)|3762 (KCNJ5)|3788 (KCNS2)|3880 (KRT19)|6616 (SNAP25)|6833 (ABCC8)|9177 (HTR3B)|10021 (HCN4)|10369 (CACNG2)|26047 (CNTNAP2)|55800 (SCN3B)|56616 (DIABLO)|57369 (GJD2)|80333 (KCNIP4)|170850 (KCNG3)|255743 (NPNT)|348…
		N	GO|GO.CC	GO:0045211	postsynaptic membrane	1.17031e-08	0.00133368	22	107 (ADCY1)|1131 (CHRM3)|1141 (CHRNB2)|1759 (DNM1)|1813 (DRD2)|2048 (EPHB2)|2566 (GABRG2)|2742 (GLRA2)|2903 (GRIN2A)|2904 (GRIN2B)|2906 (GRIN2D)|3747 (KCNC2)|3756 (KCNH1)|4988 (OPRM1)|7442 (TRPV1)|9177 (HTR3B)|9228 (DLGAP2)|10369 (CACNG2)|23623 (RUSC1)|57692 (MAGEE1)|386617 (KCTD8)|392862 (GRID2IP)
		N	GO|GO.CC	GO:0043204	perikaryon	1.27564e-08	0.00145372	14	116 (ADCYAP1)|1392 (CRH)|1393 (CRHBP)|1813 (DRD2)|2796 (GNRH1)|3747 (KCNC2)|3756 (KCNH1)|4923 (NTSR1)|4988 (OPRM1)|5179 (PENK)|7432 (VIP)|10439 (OLFM1)|26047 (CNTNAP2)|85397 (RGS8)
		N	GO|GO.BP	GO:0000904	cell morphogenesis involved in differentiation	1.29044e-08	0.00147058	34	107 (ADCY1)|367 (AR)|1141 (CHRNB2)|1292 (COL6A2)|1400 (CRMP1)|1749 (DLX5)|1813 (DRD2)|2048 (EPHB2)|2596 (GAP43)|3800 (KIF5C)|3925 (STMN1)|4804 (NGFR)|5063 (PAK3)|5864 (RAB3A)|6092 (ROBO2)|6812 (STXBP1)|8851 (CDK5R1)|9211 (LGI1)|9369 (NRXN3)|9912 (ARHGAP44)|10381 (TUBB3)|10439 (OLFM1)|10653 (SPINT2)|11023 (VAX1)|23072 (HECW1)|23543 (RBFOX2)|26039 (SS18L1)|51062 (ATL1)|55698 (RADIL)|80128 (TRIM46)|…
		N	GO|GO.BP	GO:0007626	locomotory behavior	1.50412e-08	0.0017141	17	774 (CACNA1B)|793 (CALB1)|1141 (CHRNB2)|1392 (CRH)|1813 (DRD2)|2571 (GAD1)|2906 (GRIN2D)|3084 (NRG1)|4886 (NPY1R)|4923 (NTSR1)|4988 (OPRM1)|5179 (PENK)|5581 (PRKCE)|6616 (SNAP25)|7545 (ZIC1)|22876 (INPP5F)|257194 (NEGR1)
		N	GO|GO.BP	GO:0010647	positive regulation of cell communication	1.54492e-08	0.00176059	60	116 (ADCYAP1)|284 (ANGPT1)|367 (AR)|793 (CALB1)|1141 (CHRNB2)|1268 (CNR1)|1392 (CRH)|1395 (CRHR2)|1749 (DLX5)|1813 (DRD2)|2048 (EPHB2)|2254 (FGF9)|2587 (GALR1)|2903 (GRIN2A)|2904 (GRIN2B)|2906 (GRIN2D)|3084 (NRG1)|3623 (INHA)|3645 (INSRR)|4293 (MAP3K9)|4880 (NPPC)|4923 (NTSR1)|4988 (OPRM1)|5063 (PAK3)|5581 (PRKCE)|5599 (MAPK8)|5865 (RAB3B)|5999 (RGS4)|6092 (ROBO2)|6616 (SNAP25)|6664 (SOX11)|6812 …
		N	GO|GO.MF	GO:0022857	transmembrane transporter activity	1.59256e-08	0.00181488	43	478 (ATP1A3)|534 (ATP6V1G2)|773 (CACNA1A)|774 (CACNA1B)|781 (CACNA2D1)|1141 (CHRNB2)|1268 (CNR1)|2566 (GABRG2)|2742 (GLRA2)|2903 (GRIN2A)|2904 (GRIN2B)|2906 (GRIN2D)|3747 (KCNC2)|3756 (KCNH1)|3762 (KCNJ5)|3788 (KCNS2)|4988 (OPRM1)|6519 (SLC3A1)|6534 (SLC6A7)|6616 (SNAP25)|6833 (ABCC8)|7223 (TRPC4)|7442 (TRPV1)|9177 (HTR3B)|9899 (SV2B)|10021 (HCN4)|10369 (CACNG2)|22987 (SV2C)|55503 (TRPV6)|55530 (…
		N	GO|GO.BP	GO:0060359	response to ammonium ion	1.73495e-08	0.00197715	14	1131 (CHRM3)|1141 (CHRNB2)|1268 (CNR1)|1392 (CRH)|1393 (CRHBP)|1813 (DRD2)|2566 (GABRG2)|3747 (KCNC2)|4988 (OPRM1)|5179 (PENK)|5581 (PRKCE)|5999 (RGS4)|8851 (CDK5R1)|85397 (RGS8)
		N	GO|GO.MF	GO:0008324	cation transmembrane transporter activity	1.94391e-08	0.00221527	32	478 (ATP1A3)|773 (CACNA1A)|774 (CACNA1B)|781 (CACNA2D1)|1141 (CHRNB2)|1268 (CNR1)|2903 (GRIN2A)|2904 (GRIN2B)|2906 (GRIN2D)|3747 (KCNC2)|3756 (KCNH1)|3762 (KCNJ5)|3788 (KCNS2)|4988 (OPRM1)|6534 (SLC6A7)|6616 (SNAP25)|6833 (ABCC8)|7223 (TRPC4)|7442 (TRPV1)|9177 (HTR3B)|10021 (HCN4)|10369 (CACNG2)|55503 (TRPV6)|55800 (SCN3B)|57468 (SLC12A5)|80333 (KCNIP4)|114134 (SLC2A13)|140679 (SLC32A1)|170850 (K…
		N	GO|GO.BP	GO:0032940	secretion by cell	2.07173e-08	0.00236095	53	107 (ADCY1)|116 (ADCYAP1)|284 (ANGPT1)|773 (CACNA1A)|774 (CACNA1B)|1141 (CHRNB2)|1268 (CNR1)|1392 (CRH)|1393 (CRHBP)|1813 (DRD2)|1832 (DSP)|2587 (GALR1)|3623 (INHA)|3671 (ISLR)|3747 (KCNC2)|4345 (CD200)|4923 (NTSR1)|4988 (OPRM1)|5581 (PRKCE)|5864 (RAB3A)|5865 (RAB3B)|6616 (SNAP25)|6664 (SOX11)|6812 (STXBP1)|6833 (ABCC8)|6855 (SYP)|6857 (SYT1)|6861 (SYT5)|7425 (VGF)|7432 (VIP)|7442 (TRPV1)|7447 (V…
		N	GO|GO.BP	GO:0046903	secretion	2.41037e-08	0.00274686	56	107 (ADCY1)|116 (ADCYAP1)|284 (ANGPT1)|773 (CACNA1A)|774 (CACNA1B)|1131 (CHRM3)|1141 (CHRNB2)|1268 (CNR1)|1392 (CRH)|1393 (CRHBP)|1813 (DRD2)|1832 (DSP)|2587 (GALR1)|3084 (NRG1)|3623 (INHA)|3671 (ISLR)|3747 (KCNC2)|4345 (CD200)|4923 (NTSR1)|4988 (OPRM1)|5581 (PRKCE)|5864 (RAB3A)|5865 (RAB3B)|6616 (SNAP25)|6664 (SOX11)|6812 (STXBP1)|6833 (ABCC8)|6855 (SYP)|6857 (SYT1)|6861 (SYT5)|7223 (TRPC4)|7425…
		N	GO|GO.BP	GO:0061564	axon development	2.78812e-08	0.00317734	27	107 (ADCY1)|1141 (CHRNB2)|1268 (CNR1)|1400 (CRMP1)|1749 (DLX5)|1813 (DRD2)|2048 (EPHB2)|2596 (GAP43)|3800 (KIF5C)|3925 (STMN1)|4804 (NGFR)|5063 (PAK3)|5864 (RAB3A)|6092 (ROBO2)|6812 (STXBP1)|8851 (CDK5R1)|9211 (LGI1)|9369 (NRXN3)|10381 (TUBB3)|10439 (OLFM1)|11023 (VAX1)|22876 (INPP5F)|51062 (ATL1)|80128 (TRIM46)|84570 (COL25A1)|137970 (UNC5D)|494470 (RNF165)
		N	GO|GO.BP	GO:0006810	transport	2.95472e-08	0.0033672	125	107 (ADCY1)|116 (ADCYAP1)|284 (ANGPT1)|478 (ATP1A3)|534 (ATP6V1G2)|773 (CACNA1A)|774 (CACNA1B)|781 (CACNA2D1)|1131 (CHRM3)|1141 (CHRNB2)|1268 (CNR1)|1392 (CRH)|1393 (CRHBP)|1612 (DAPK1)|1759 (DNM1)|1780 (DYNC1I1)|1813 (DRD2)|1832 (DSP)|2048 (EPHB2)|2139 (EYA2)|2170 (FABP3)|2254 (FGF9)|2566 (GABRG2)|2587 (GALR1)|2742 (GLRA2)|2903 (GRIN2A)|2904 (GRIN2B)|2906 (GRIN2D)|3084 (NRG1)|3623 (INHA)|3671 (I…
		N	GO|GO.BP	GO:0034220	ion transmembrane transport	3.11249e-08	0.003547	44	478 (ATP1A3)|534 (ATP6V1G2)|773 (CACNA1A)|774 (CACNA1B)|781 (CACNA2D1)|1141 (CHRNB2)|1392 (CRH)|1393 (CRHBP)|1612 (DAPK1)|1813 (DRD2)|2048 (EPHB2)|2566 (GABRG2)|2742 (GLRA2)|2903 (GRIN2A)|2904 (GRIN2B)|2906 (GRIN2D)|3747 (KCNC2)|3756 (KCNH1)|3762 (KCNJ5)|3788 (KCNS2)|4923 (NTSR1)|4988 (OPRM1)|5581 (PRKCE)|5999 (RGS4)|6519 (SLC3A1)|6534 (SLC6A7)|6616 (SNAP25)|6833 (ABCC8)|7223 (TRPC4)|7442 (TRPV1)…
		N	GO|GO.BP	GO:0009719	response to endogenous stimulus	3.24169e-08	0.00369424	56	58 (ACTA1)|107 (ADCY1)|116 (ADCYAP1)|367 (AR)|478 (ATP1A3)|534 (ATP6V1G2)|773 (CACNA1A)|781 (CACNA2D1)|1131 (CHRM3)|1141 (CHRNB2)|1392 (CRH)|1393 (CRHBP)|1395 (CRHR2)|1745 (DLX1)|1749 (DLX5)|2170 (FABP3)|2254 (FGF9)|2566 (GABRG2)|2742 (GLRA2)|2796 (GNRH1)|3645 (INSRR)|3747 (KCNC2)|4804 (NGFR)|4988 (OPRM1)|5179 (PENK)|5228 (PGF)|5241 (PGR)|5575 (PRKAR1B)|5581 (PRKCE)|6092 (ROBO2)|6664 (SOX11)|6750…
		N	GO|GO.CC	GO:0098563	intrinsic component of synaptic vesicle membrane	3.87135e-08	0.00441179	9	5864 (RAB3A)|5865 (RAB3B)|6855 (SYP)|6857 (SYT1)|22987 (SV2C)|115827 (RAB3C)|132204 (SYNPR)|140679 (SLC32A1)|388662 (SLC6A17)
		N	GO|GO.CC	GO:0098590	plasma membrane region	4.06531e-08	0.00463283	45	107 (ADCY1)|1006 (CDH8)|1131 (CHRM3)|1141 (CHRNB2)|1268 (CNR1)|1759 (DNM1)|1813 (DRD2)|1832 (DSP)|2048 (EPHB2)|2566 (GABRG2)|2572 (GAD2)|2596 (GAP43)|2742 (GLRA2)|2903 (GRIN2A)|2904 (GRIN2B)|2906 (GRIN2D)|3747 (KCNC2)|3756 (KCNH1)|3880 (KRT19)|4988 (OPRM1)|6092 (ROBO2)|6519 (SLC3A1)|6616 (SNAP25)|6812 (STXBP1)|6855 (SYP)|6857 (SYT1)|7223 (TRPC4)|7442 (TRPV1)|9177 (HTR3B)|9228 (DLGAP2)|10369 (CACN…
		N	GO|GO.BP	GO:0000902	cell morphogenesis	4.8687e-08	0.00554837	40	107 (ADCY1)|367 (AR)|1141 (CHRNB2)|1292 (COL6A2)|1400 (CRMP1)|1749 (DLX5)|1813 (DRD2)|2048 (EPHB2)|2596 (GAP43)|3084 (NRG1)|3800 (KIF5C)|3925 (STMN1)|4804 (NGFR)|5063 (PAK3)|5864 (RAB3A)|6092 (ROBO2)|6812 (STXBP1)|6857 (SYT1)|8851 (CDK5R1)|9211 (LGI1)|9369 (NRXN3)|9912 (ARHGAP44)|10381 (TUBB3)|10439 (OLFM1)|10653 (SPINT2)|11023 (VAX1)|23025 (UNC13A)|23072 (HECW1)|23543 (RBFOX2)|26039 (SS18L1)|260…
		N	GO|GO.CC	GO:0061200	clathrin-sculpted gamma-aminobutyric acid transport vesicle	5.34879e-08	0.00609548	5	2571 (GAD1)|2572 (GAD2)|5864 (RAB3A)|6857 (SYT1)|140679 (SLC32A1)
		N	GO|GO.CC	GO:0061202	clathrin-sculpted gamma-aminobutyric acid transport vesicle membrane	5.34879e-08	0.00609548	5	2571 (GAD1)|2572 (GAD2)|5864 (RAB3A)|6857 (SYT1)|140679 (SLC32A1)
		N	GO|GO.BP	GO:0010975	regulation of neuron projection development	5.83147e-08	0.00664554	26	116 (ADCYAP1)|1141 (CHRNB2)|1268 (CNR1)|1400 (CRMP1)|2048 (EPHB2)|4804 (NGFR)|5063 (PAK3)|6092 (ROBO2)|6616 (SNAP25)|6857 (SYT1)|8851 (CDK5R1)|9856 (KIAA0319)|9912 (ARHGAP44)|10439 (OLFM1)|11075 (STMN2)|22876 (INPP5F)|23025 (UNC13A)|23072 (HECW1)|26039 (SS18L1)|29993 (PACSIN1)|65009 (NDRG4)|80128 (TRIM46)|84258 (SYT3)|91752 (ZNF804A)|257194 (NEGR1)|100528062 (ARMCX5-GPRASP2)
		N	GO|GO.BP	GO:0051234	establishment of localization	5.98059e-08	0.00681548	126	107 (ADCY1)|116 (ADCYAP1)|284 (ANGPT1)|478 (ATP1A3)|534 (ATP6V1G2)|773 (CACNA1A)|774 (CACNA1B)|781 (CACNA2D1)|1131 (CHRM3)|1141 (CHRNB2)|1268 (CNR1)|1392 (CRH)|1393 (CRHBP)|1612 (DAPK1)|1759 (DNM1)|1780 (DYNC1I1)|1813 (DRD2)|1832 (DSP)|2048 (EPHB2)|2139 (EYA2)|2170 (FABP3)|2254 (FGF9)|2566 (GABRG2)|2587 (GALR1)|2742 (GLRA2)|2903 (GRIN2A)|2904 (GRIN2B)|2906 (GRIN2D)|3084 (NRG1)|3623 (INHA)|3671 (I…
		N	GO|GO.BP	GO:0007409	axonogenesis	6.76189e-08	0.00770585	25	107 (ADCY1)|1141 (CHRNB2)|1400 (CRMP1)|1749 (DLX5)|1813 (DRD2)|2048 (EPHB2)|2596 (GAP43)|3800 (KIF5C)|3925 (STMN1)|4804 (NGFR)|5063 (PAK3)|5864 (RAB3A)|6092 (ROBO2)|6812 (STXBP1)|8851 (CDK5R1)|9211 (LGI1)|9369 (NRXN3)|10381 (TUBB3)|10439 (OLFM1)|11023 (VAX1)|51062 (ATL1)|80128 (TRIM46)|84570 (COL25A1)|137970 (UNC5D)|494470 (RNF165)
		N	GO|GO.BP	GO:0051179	localization	7.38492e-08	0.00841585	150	107 (ADCY1)|116 (ADCYAP1)|284 (ANGPT1)|367 (AR)|398 (ARHGDIG)|478 (ATP1A3)|534 (ATP6V1G2)|773 (CACNA1A)|774 (CACNA1B)|781 (CACNA2D1)|1131 (CHRM3)|1141 (CHRNB2)|1268 (CNR1)|1392 (CRH)|1393 (CRHBP)|1612 (DAPK1)|1641 (DCX)|1759 (DNM1)|1780 (DYNC1I1)|1813 (DRD2)|1832 (DSP)|2048 (EPHB2)|2139 (EYA2)|2170 (FABP3)|2254 (FGF9)|2566 (GABRG2)|2587 (GALR1)|2742 (GLRA2)|2796 (GNRH1)|2903 (GRIN2A)|2904 (GRIN2B…
		N	GO|GO.BP	GO:0032989	cellular component morphogenesis	8.14973e-08	0.00928744	42	58 (ACTA1)|107 (ADCY1)|367 (AR)|1141 (CHRNB2)|1292 (COL6A2)|1400 (CRMP1)|1749 (DLX5)|1813 (DRD2)|2048 (EPHB2)|2596 (GAP43)|3084 (NRG1)|3800 (KIF5C)|3880 (KRT19)|3925 (STMN1)|4804 (NGFR)|5063 (PAK3)|5864 (RAB3A)|6092 (ROBO2)|6812 (STXBP1)|6857 (SYT1)|8851 (CDK5R1)|9211 (LGI1)|9369 (NRXN3)|9912 (ARHGAP44)|10381 (TUBB3)|10439 (OLFM1)|10653 (SPINT2)|11023 (VAX1)|23025 (UNC13A)|23072 (HECW1)|23543 (RB…
		N	GO|GO.BP	GO:0034765	regulation of ion transmembrane transport	8.36393e-08	0.00953154	25	773 (CACNA1A)|774 (CACNA1B)|781 (CACNA2D1)|1392 (CRH)|1393 (CRHBP)|1612 (DAPK1)|1813 (DRD2)|2048 (EPHB2)|3747 (KCNC2)|3756 (KCNH1)|3762 (KCNJ5)|3788 (KCNS2)|4923 (NTSR1)|4988 (OPRM1)|5581 (PRKCE)|5999 (RGS4)|6833 (ABCC8)|10021 (HCN4)|10369 (CACNG2)|23072 (HECW1)|55800 (SCN3B)|80333 (KCNIP4)|161253 (REM2)|170850 (KCNG3)|348980 (HCN1)
		N	GO|GO.BP	GO:0071495	cellular response to endogenous stimulus	8.90766e-08	0.0101512	49	58 (ACTA1)|107 (ADCY1)|116 (ADCYAP1)|367 (AR)|478 (ATP1A3)|534 (ATP6V1G2)|773 (CACNA1A)|781 (CACNA2D1)|1131 (CHRM3)|1141 (CHRNB2)|1392 (CRH)|1393 (CRHBP)|1395 (CRHR2)|1745 (DLX1)|1749 (DLX5)|2254 (FGF9)|2566 (GABRG2)|2742 (GLRA2)|3645 (INSRR)|4804 (NGFR)|4988 (OPRM1)|5179 (PENK)|5228 (PGF)|5241 (PGR)|5575 (PRKAR1B)|5581 (PRKCE)|6092 (ROBO2)|6664 (SOX11)|6750 (SST)|7442 (TRPV1)|7532 (YWHAG)|8851 (…
		N	GO|GO.MF	GO:0005215	transporter activity	8.97954e-08	0.0102331	46	478 (ATP1A3)|534 (ATP6V1G2)|773 (CACNA1A)|774 (CACNA1B)|781 (CACNA2D1)|1141 (CHRNB2)|1268 (CNR1)|2170 (FABP3)|2566 (GABRG2)|2742 (GLRA2)|2903 (GRIN2A)|2904 (GRIN2B)|2906 (GRIN2D)|3747 (KCNC2)|3756 (KCNH1)|3762 (KCNJ5)|3788 (KCNS2)|4988 (OPRM1)|6519 (SLC3A1)|6534 (SLC6A7)|6616 (SNAP25)|6833 (ABCC8)|7223 (TRPC4)|7442 (TRPV1)|9177 (HTR3B)|9899 (SV2B)|10021 (HCN4)|10369 (CACNG2)|10815 (CPLX1)|22987 (…
		N	GO|GO.MF	GO:0000149	SNARE binding	9.09725e-08	0.0103672	12	773 (CACNA1A)|1612 (DAPK1)|6616 (SNAP25)|6812 (STXBP1)|6857 (SYT1)|6861 (SYT5)|8447 (DOC2B)|10815 (CPLX1)|23025 (UNC13A)|57586 (SYT13)|63908 (NAPB)|84258 (SYT3)
		N	GO|GO.BP	GO:0120036	plasma membrane bounded cell projection organization	9.57094e-08	0.010907	51	107 (ADCY1)|116 (ADCYAP1)|478 (ATP1A3)|1141 (CHRNB2)|1268 (CNR1)|1400 (CRMP1)|1641 (DCX)|1749 (DLX5)|1813 (DRD2)|2048 (EPHB2)|2596 (GAP43)|2904 (GRIN2B)|3800 (KIF5C)|3925 (STMN1)|4804 (NGFR)|5063 (PAK3)|5864 (RAB3A)|6092 (ROBO2)|6616 (SNAP25)|6812 (STXBP1)|6857 (SYT1)|7532 (YWHAG)|8851 (CDK5R1)|9211 (LGI1)|9369 (NRXN3)|9856 (KIAA0319)|9912 (ARHGAP44)|10381 (TUBB3)|10439 (OLFM1)|11023 (VAX1)|11075…
		N	GO|GO.BP	GO:0098662	inorganic cation transmembrane transport	1.03884e-07	0.0118386	33	478 (ATP1A3)|534 (ATP6V1G2)|773 (CACNA1A)|774 (CACNA1B)|781 (CACNA2D1)|1813 (DRD2)|2903 (GRIN2A)|2904 (GRIN2B)|2906 (GRIN2D)|3747 (KCNC2)|3756 (KCNH1)|3762 (KCNJ5)|3788 (KCNS2)|4923 (NTSR1)|4988 (OPRM1)|5581 (PRKCE)|5999 (RGS4)|6616 (SNAP25)|6833 (ABCC8)|7223 (TRPC4)|7442 (TRPV1)|9481 (SLC25A27)|10021 (HCN4)|10369 (CACNG2)|23072 (HECW1)|55503 (TRPV6)|55800 (SCN3B)|57468 (SLC12A5)|80333 (KCNIP4)|1…
		N	GO|GO.BP	GO:1903305	regulation of regulated secretory pathway	1.10302e-07	0.01257	14	107 (ADCY1)|1141 (CHRNB2)|1268 (CNR1)|1813 (DRD2)|5864 (RAB3A)|6812 (STXBP1)|6855 (SYP)|6857 (SYT1)|6861 (SYT5)|8447 (DOC2B)|8448 (DOC2A)|10815 (CPLX1)|55503 (TRPV6)|63908 (NAPB)
		N	GO|GO.BP	GO:0046879	hormone secretion	1.13392e-07	0.0129222	20	116 (ADCYAP1)|773 (CACNA1A)|1268 (CNR1)|1392 (CRH)|1393 (CRHBP)|1813 (DRD2)|2587 (GALR1)|3623 (INHA)|3747 (KCNC2)|5581 (PRKCE)|6616 (SNAP25)|6664 (SOX11)|6833 (ABCC8)|7425 (VGF)|7432 (VIP)|7447 (VSNL1)|8447 (DOC2B)|10815 (CPLX1)|55512 (SMPD3)|114897 (C1QTNF1)
		N	GO|GO.BP	GO:0055085	transmembrane transport	1.14894e-07	0.0130934	52	478 (ATP1A3)|534 (ATP6V1G2)|773 (CACNA1A)|774 (CACNA1B)|781 (CACNA2D1)|1141 (CHRNB2)|1392 (CRH)|1393 (CRHBP)|1612 (DAPK1)|1813 (DRD2)|2048 (EPHB2)|2566 (GABRG2)|2742 (GLRA2)|2903 (GRIN2A)|2904 (GRIN2B)|2906 (GRIN2D)|3747 (KCNC2)|3756 (KCNH1)|3762 (KCNJ5)|3788 (KCNS2)|4923 (NTSR1)|4988 (OPRM1)|5581 (PRKCE)|5999 (RGS4)|6519 (SLC3A1)|6534 (SLC6A7)|6616 (SNAP25)|6833 (ABCC8)|7223 (TRPC4)|7442 (TRPV1)…
		N	GO|GO.BP	GO:0048167	regulation of synaptic plasticity	1.23101e-07	0.0140286	15	793 (CALB1)|1392 (CRH)|1395 (CRHR2)|1813 (DRD2)|2048 (EPHB2)|2903 (GRIN2A)|2904 (GRIN2B)|2906 (GRIN2D)|5864 (RAB3A)|6616 (SNAP25)|6812 (STXBP1)|6855 (SYP)|7532 (YWHAG)|23025 (UNC13A)|392862 (GRID2IP)
		N	GO|GO.BP	GO:0030001	metal ion transport	1.23507e-07	0.0140748	36	116 (ADCYAP1)|478 (ATP1A3)|534 (ATP6V1G2)|773 (CACNA1A)|774 (CACNA1B)|781 (CACNA2D1)|1141 (CHRNB2)|1392 (CRH)|1813 (DRD2)|2903 (GRIN2A)|2904 (GRIN2B)|2906 (GRIN2D)|3747 (KCNC2)|3756 (KCNH1)|3762 (KCNJ5)|3788 (KCNS2)|4923 (NTSR1)|4988 (OPRM1)|5581 (PRKCE)|5999 (RGS4)|6616 (SNAP25)|6833 (ABCC8)|7223 (TRPC4)|7432 (VIP)|7442 (TRPV1)|10021 (HCN4)|10369 (CACNG2)|23072 (HECW1)|55503 (TRPV6)|55800 (SCN3B…
		N	GO|GO.BP	GO:0051716	cellular response to stimulus	1.30439e-07	0.0148649	164	58 (ACTA1)|107 (ADCY1)|116 (ADCYAP1)|284 (ANGPT1)|367 (AR)|398 (ARHGDIG)|478 (ATP1A3)|534 (ATP6V1G2)|773 (CACNA1A)|781 (CACNA2D1)|793 (CALB1)|1114 (CHGB)|1131 (CHRM3)|1141 (CHRNB2)|1268 (CNR1)|1381 (CRABP1)|1392 (CRH)|1393 (CRHBP)|1395 (CRHR2)|1608 (DGKG)|1612 (DAPK1)|1641 (DCX)|1745 (DLX1)|1749 (DLX5)|1759 (DNM1)|1813 (DRD2)|2048 (EPHB2)|2139 (EYA2)|2254 (FGF9)|2566 (GABRG2)|2587 (GALR1)|2596 (G…
		N	GO|GO.BP	GO:0098660	inorganic ion transmembrane transport	1.39785e-07	0.0159299	35	478 (ATP1A3)|534 (ATP6V1G2)|773 (CACNA1A)|774 (CACNA1B)|781 (CACNA2D1)|1813 (DRD2)|2566 (GABRG2)|2742 (GLRA2)|2903 (GRIN2A)|2904 (GRIN2B)|2906 (GRIN2D)|3747 (KCNC2)|3756 (KCNH1)|3762 (KCNJ5)|3788 (KCNS2)|4923 (NTSR1)|4988 (OPRM1)|5581 (PRKCE)|5999 (RGS4)|6616 (SNAP25)|6833 (ABCC8)|7223 (TRPC4)|7442 (TRPV1)|9481 (SLC25A27)|10021 (HCN4)|10369 (CACNG2)|23072 (HECW1)|55503 (TRPV6)|55800 (SCN3B)|57468…
		N	GO|GO.BP	GO:0009914	hormone transport	1.90709e-07	0.0217332	20	116 (ADCYAP1)|773 (CACNA1A)|1268 (CNR1)|1392 (CRH)|1393 (CRHBP)|1813 (DRD2)|2587 (GALR1)|3623 (INHA)|3747 (KCNC2)|5581 (PRKCE)|6616 (SNAP25)|6664 (SOX11)|6833 (ABCC8)|7425 (VGF)|7432 (VIP)|7447 (VSNL1)|8447 (DOC2B)|10815 (CPLX1)|55512 (SMPD3)|114897 (C1QTNF1)
		N	GO|GO.BP	GO:0007215	glutamate receptor signaling pathway	1.91636e-07	0.0218388	11	1392 (CRH)|1393 (CRHBP)|1612 (DAPK1)|2048 (EPHB2)|2903 (GRIN2A)|2904 (GRIN2B)|2906 (GRIN2D)|4988 (OPRM1)|8851 (CDK5R1)|10369 (CACNG2)|23025 (UNC13A)
		N	GO|GO.BP	GO:0097305	response to alcohol	1.93606e-07	0.0220633	17	107 (ADCY1)|116 (ADCYAP1)|1141 (CHRNB2)|1268 (CNR1)|1392 (CRH)|1393 (CRHBP)|1813 (DRD2)|2742 (GLRA2)|2796 (GNRH1)|2903 (GRIN2A)|2904 (GRIN2B)|3747 (KCNC2)|4880 (NPPC)|4988 (OPRM1)|5179 (PENK)|5581 (PRKCE)|5999 (RGS4)
		N	GO|GO.BP	GO:0030030	cell projection organization	1.9942e-07	0.0227259	51	107 (ADCY1)|116 (ADCYAP1)|478 (ATP1A3)|1141 (CHRNB2)|1268 (CNR1)|1400 (CRMP1)|1641 (DCX)|1749 (DLX5)|1813 (DRD2)|2048 (EPHB2)|2596 (GAP43)|2904 (GRIN2B)|3800 (KIF5C)|3925 (STMN1)|4804 (NGFR)|5063 (PAK3)|5864 (RAB3A)|6092 (ROBO2)|6616 (SNAP25)|6812 (STXBP1)|6857 (SYT1)|7532 (YWHAG)|8851 (CDK5R1)|9211 (LGI1)|9369 (NRXN3)|9856 (KIAA0319)|9912 (ARHGAP44)|10381 (TUBB3)|10439 (OLFM1)|11023 (VAX1)|11075…
		N	GO|GO.BP	GO:1901698	response to nitrogen compound	2.17098e-07	0.0247405	40	58 (ACTA1)|107 (ADCY1)|478 (ATP1A3)|534 (ATP6V1G2)|773 (CACNA1A)|781 (CACNA2D1)|1131 (CHRM3)|1141 (CHRNB2)|1268 (CNR1)|1392 (CRH)|1393 (CRHBP)|1395 (CRHR2)|1759 (DNM1)|1813 (DRD2)|2170 (FABP3)|2566 (GABRG2)|2742 (GLRA2)|2796 (GNRH1)|2903 (GRIN2A)|3645 (INSRR)|3747 (KCNC2)|4804 (NGFR)|4988 (OPRM1)|5179 (PENK)|5575 (PRKAR1B)|5581 (PRKCE)|5999 (RGS4)|6750 (SST)|6833 (ABCC8)|7161 (TP73)|7425 (VGF)|74…
		N	GO|GO.BP	GO:0050808	synapse organization	2.60625e-07	0.0297008	22	1006 (CDH8)|1141 (CHRNB2)|1813 (DRD2)|2048 (EPHB2)|2596 (GAP43)|2904 (GRIN2B)|3084 (NRG1)|5063 (PAK3)|5864 (RAB3A)|6092 (ROBO2)|8851 (CDK5R1)|8927 (BSN)|9118 (INA)|9758 (FRMPD4)|9912 (ARHGAP44)|10369 (CACNG2)|23025 (UNC13A)|26059 (ERC2)|53942 (CNTN5)|91752 (ZNF804A)|266727 (MDGA1)|100528062 (ARMCX5-GPRASP2)
		N	GO|GO.MF	GO:0015318	inorganic molecular entity transmembrane transporter activity	2.6165e-07	0.0298176	35	478 (ATP1A3)|773 (CACNA1A)|774 (CACNA1B)|781 (CACNA2D1)|1141 (CHRNB2)|1268 (CNR1)|2566 (GABRG2)|2742 (GLRA2)|2903 (GRIN2A)|2904 (GRIN2B)|2906 (GRIN2D)|3747 (KCNC2)|3756 (KCNH1)|3762 (KCNJ5)|3788 (KCNS2)|4988 (OPRM1)|6519 (SLC3A1)|6534 (SLC6A7)|6616 (SNAP25)|6833 (ABCC8)|7223 (TRPC4)|7442 (TRPV1)|9177 (HTR3B)|10021 (HCN4)|10369 (CACNG2)|55503 (TRPV6)|55800 (SCN3B)|57468 (SLC12A5)|80333 (KCNIP4)|11…
		N	GO|GO.BP	GO:0065007	biological regulation	3.00788e-07	0.0342778	243	58 (ACTA1)|107 (ADCY1)|116 (ADCYAP1)|284 (ANGPT1)|367 (AR)|398 (ARHGDIG)|478 (ATP1A3)|534 (ATP6V1G2)|773 (CACNA1A)|774 (CACNA1B)|781 (CACNA2D1)|793 (CALB1)|1006 (CDH8)|1114 (CHGB)|1131 (CHRM3)|1141 (CHRNB2)|1268 (CNR1)|1381 (CRABP1)|1392 (CRH)|1393 (CRHBP)|1395 (CRHR2)|1400 (CRMP1)|1608 (DGKG)|1612 (DAPK1)|1641 (DCX)|1745 (DLX1)|1749 (DLX5)|1759 (DNM1)|1813 (DRD2)|1832 (DSP)|2048 (EPHB2)|2139 (EY…
		N	GO|GO.BP	GO:0050769	positive regulation of neurogenesis	3.09658e-07	0.0352886	24	116 (ADCYAP1)|1268 (CNR1)|1745 (DLX1)|1813 (DRD2)|2048 (EPHB2)|4674 (NAP1L2)|4804 (NGFR)|4988 (OPRM1)|5063 (PAK3)|5121 (PCP4)|6092 (ROBO2)|6664 (SOX11)|6857 (SYT1)|7161 (TP73)|11075 (STMN2)|23025 (UNC13A)|26039 (SS18L1)|29993 (PACSIN1)|50937 (CDON)|65009 (NDRG4)|84258 (SYT3)|91752 (ZNF804A)|257194 (NEGR1)|100528062 (ARMCX5-GPRASP2)
		N	GO|GO.MF	GO:0043167	ion binding	3.31574e-07	0.0377861	141	58 (ACTA1)|107 (ADCY1)|367 (AR)|478 (ATP1A3)|773 (CACNA1A)|774 (CACNA1B)|781 (CACNA2D1)|793 (CALB1)|956 (ENTPD3)|1005 (CDH7)|1006 (CDH8)|1131 (CHRM3)|1141 (CHRNB2)|1159 (CKMT1B)|1381 (CRABP1)|1608 (DGKG)|1612 (DAPK1)|1759 (DNM1)|1813 (DRD2)|2048 (EPHB2)|2139 (EYA2)|2170 (FABP3)|2254 (FGF9)|2571 (GAD1)|2572 (GAD2)|2596 (GAP43)|2742 (GLRA2)|2835 (GPR12)|2903 (GRIN2A)|2904 (GRIN2B)|3645 (INSRR)|3756…
		N	GO|GO.BP	GO:0051937	catecholamine transport	3.44073e-07	0.0392106	10	1141 (CHRNB2)|1268 (CNR1)|1392 (CRH)|1813 (DRD2)|5865 (RAB3B)|6857 (SYT1)|6861 (SYT5)|7432 (VIP)|57586 (SYT13)|84258 (SYT3)
		N	GO|GO.BP	GO:0060078	regulation of postsynaptic membrane potential	3.59331e-07	0.0409494	13	116 (ADCYAP1)|1141 (CHRNB2)|1813 (DRD2)|2566 (GABRG2)|2742 (GLRA2)|2903 (GRIN2A)|2904 (GRIN2B)|2906 (GRIN2D)|4923 (NTSR1)|4988 (OPRM1)|5999 (RGS4)|7442 (TRPV1)|56853 (CELF4)
		N	GO|GO.MF	GO:0015075	ion transmembrane transporter activity	3.92173e-07	0.044692	36	478 (ATP1A3)|773 (CACNA1A)|774 (CACNA1B)|781 (CACNA2D1)|1141 (CHRNB2)|1268 (CNR1)|2566 (GABRG2)|2742 (GLRA2)|2903 (GRIN2A)|2904 (GRIN2B)|2906 (GRIN2D)|3747 (KCNC2)|3756 (KCNH1)|3762 (KCNJ5)|3788 (KCNS2)|4988 (OPRM1)|6519 (SLC3A1)|6534 (SLC6A7)|6616 (SNAP25)|6833 (ABCC8)|7223 (TRPC4)|7442 (TRPV1)|9177 (HTR3B)|10021 (HCN4)|10369 (CACNG2)|55503 (TRPV6)|55800 (SCN3B)|57468 (SLC12A5)|80333 (KCNIP4)|83…
		N	GO|GO.BP	GO:0015893	drug transport	4.33415e-07	0.049392	16	1141 (CHRNB2)|1268 (CNR1)|1392 (CRH)|1813 (DRD2)|2587 (GALR1)|4923 (NTSR1)|5865 (RAB3B)|5999 (RGS4)|6857 (SYT1)|6861 (SYT5)|26034 (IPCEF1)|57586 (SYT13)|83546 (RTBDN)|84258 (SYT3)|140679 (SLC32A1)|388662 (SLC6A17)
		O	GO|GO.MF	GO:0005201	extracellular matrix structural constituent	5.51013e-11	6.27935e-06	12	176 (ACAN)|1277 (COL1A1)|1278 (COL1A2)|1281 (COL3A1)|1303 (COL12A1)|1634 (DCN)|2202 (EFEMP1)|4239 (MFAP4)|5118 (PCOLCE)|5549 (PRELP)|10418 (SPON1)|127435 (PODN)
		O	GO|GO.CC	GO:0062023	collagen-containing extracellular matrix	4.08081e-10	4.65049e-05	15	176 (ACAN)|1277 (COL1A1)|1278 (COL1A2)|1281 (COL3A1)|1303 (COL12A1)|1634 (DCN)|2202 (EFEMP1)|3698 (ITIH2)|4239 (MFAP4)|5118 (PCOLCE)|5549 (PRELP)|9423 (NTN1)|9509 (ADAMTS2)|10418 (SPON1)|127435 (PODN)
		O	GO|GO.CC	GO:0031012	extracellular matrix	1.4632e-09	0.000166747	17	176 (ACAN)|1277 (COL1A1)|1278 (COL1A2)|1281 (COL3A1)|1303 (COL12A1)|1634 (DCN)|2202 (EFEMP1)|3698 (ITIH2)|4239 (MFAP4)|5118 (PCOLCE)|5549 (PRELP)|9423 (NTN1)|9509 (ADAMTS2)|10418 (SPON1)|127435 (PODN)|347731 (LRRTM3)|645191 (LINGO3)
		O	GO|GO.BP	GO:0048731	system development	2.19789e-07	0.0250472	51	176 (ACAN)|429 (ASCL1)|780 (DDR1)|1277 (COL1A1)|1278 (COL1A2)|1281 (COL3A1)|1303 (COL12A1)|1410 (CRYAB)|1634 (DCN)|2009 (EML1)|2047 (EPHB1)|2134 (EXTL1)|2202 (EFEMP1)|2534 (FYN)|2934 (GSN)|3481 (IGF2)|3691 (ITGB4)|3798 (KIF5A)|4072 (EPCAM)|4168 (MCF2)|4604 (MYBPC1)|5549 (PRELP)|5923 (RASGRF1)|5954 (RCN1)|6275 (S100A4)|6444 (SGCD)|8038 (ADAM12)|8437 (RASAL1)|8503 (PIK3R3)|8516 (ITGA8)|9096 (TBX18)…
		O	GO|GO.BP	GO:0009653	anatomical structure morphogenesis	2.38875e-07	0.0272221	35	176 (ACAN)|780 (DDR1)|1277 (COL1A1)|1278 (COL1A2)|1281 (COL3A1)|1303 (COL12A1)|1410 (CRYAB)|1634 (DCN)|2047 (EPHB1)|2202 (EFEMP1)|2534 (FYN)|3481 (IGF2)|3691 (ITGB4)|3798 (KIF5A)|4168 (MCF2)|4604 (MYBPC1)|8038 (ADAM12)|8437 (RASAL1)|8503 (PIK3R3)|8516 (ITGA8)|9096 (TBX18)|9423 (NTN1)|9480 (ONECUT2)|10683 (DLL3)|11155 (LDB3)|22865 (SLITRK3)|23111 (SPART)|23670 (CEMIP2)|26999 (CYFIP2)|50515 (CHST11…
		O	GO|GO.CC	GO:0044420	extracellular matrix component	2.75455e-07	0.0313908	6	176 (ACAN)|1277 (COL1A1)|1278 (COL1A2)|1281 (COL3A1)|1303 (COL12A1)|4239 (MFAP4)
		O	GO|GO.BP	GO:0030199	collagen fibril organization	3.95703e-07	0.0450943	6	176 (ACAN)|1277 (COL1A1)|1278 (COL1A2)|1281 (COL3A1)|1303 (COL12A1)|9509 (ADAMTS2)
		O	GO|GO.BP	GO:0007275	multicellular organism development	4.11594e-07	0.0469052	54	176 (ACAN)|429 (ASCL1)|780 (DDR1)|1277 (COL1A1)|1278 (COL1A2)|1281 (COL3A1)|1303 (COL12A1)|1410 (CRYAB)|1634 (DCN)|2009 (EML1)|2047 (EPHB1)|2134 (EXTL1)|2202 (EFEMP1)|2534 (FYN)|2934 (GSN)|3481 (IGF2)|3691 (ITGB4)|3798 (KIF5A)|4072 (EPCAM)|4168 (MCF2)|4604 (MYBPC1)|5118 (PCOLCE)|5549 (PRELP)|5923 (RASGRF1)|5954 (RCN1)|6275 (S100A4)|6444 (SGCD)|8038 (ADAM12)|8437 (RASAL1)|8503 (PIK3R3)|8516 (ITGA8…
		O	GO|GO.BP	GO:0007155	cell adhesion	4.15723e-07	0.0473758	24	176 (ACAN)|780 (DDR1)|1277 (COL1A1)|1281 (COL3A1)|1303 (COL12A1)|2047 (EPHB1)|2534 (FYN)|2934 (GSN)|3481 (IGF2)|3691 (ITGB4)|4072 (EPCAM)|4239 (MFAP4)|4604 (MYBPC1)|8038 (ADAM12)|8516 (ITGA8)|9423 (NTN1)|9480 (ONECUT2)|10418 (SPON1)|22865 (SLITRK3)|26999 (CYFIP2)|57689 (LRRC4C)|114798 (SLITRK1)|129804 (FBLN7)|152330 (CNTN4)

## Sheet: S5B Table - TCX Upregulated
			Cell	GO_Group	DataSetID	DataSetName	p	Bonferroni	#Genes	Genes
			A	GO|GO.BP	GO:0009653	anatomical structure morphogenesis	5.72377e-14	6.52281e-09	61	183 (AGT)|249 (ALPL)|558 (AXL)|658 (BMPR1B)|960 (CD44)|1363 (CPE)|1545 (CYP1B1)|1956 (EGFR)|2013 (EMP2)|2064 (ERBB2)|2239 (GPC4)|2260 (FGFR1)|2735 (GLI1)|2736 (GLI2)|2737 (GLI3)|3082 (HGF)|3371 (TNC)|3373 (HYAL1)|3400 (ID4)|3679 (ITGA7)|4323 (MMP14)|4488 (MSX2)|4853 (NOTCH2)|4854 (NOTCH3)|5013 (OTX1)|5080 (PAX6)|5364 (PLXNB1)|5454 (POU3F2)|5465 (PPARA)|5654 (HTRA1)|5764 (PTN)|5803 (PTPRZ1)|5925 (…
			A	GO|GO.BP	GO:0048731	system development	1.43738e-13	1.63804e-08	86	183 (AGT)|205 (AK4)|249 (ALPL)|558 (AXL)|658 (BMPR1B)|960 (CD44)|1363 (CPE)|1463 (NCAN)|1545 (CYP1B1)|1956 (EGFR)|2013 (EMP2)|2064 (ERBB2)|2173 (FABP7)|2239 (GPC4)|2260 (FGFR1)|2560 (GABRB1)|2670 (GFAP)|2697 (GJA1)|2735 (GLI1)|2736 (GLI2)|2737 (GLI3)|2746 (GLUD1)|3082 (HGF)|3371 (TNC)|3373 (HYAL1)|3400 (ID4)|3679 (ITGA7)|4052 (LTBP1)|4129 (MAOB)|4323 (MMP14)|4488 (MSX2)|4853 (NOTCH2)|4854 (NOTCH3…
			A	GO|GO.BP	GO:0050793	regulation of developmental process	2.22206e-13	2.53226e-08	60	183 (AGT)|558 (AXL)|658 (BMPR1B)|960 (CD44)|1545 (CYP1B1)|1956 (EGFR)|2013 (EMP2)|2064 (ERBB2)|2239 (GPC4)|2260 (FGFR1)|2670 (GFAP)|2735 (GLI1)|2736 (GLI2)|2737 (GLI3)|3082 (HGF)|3373 (HYAL1)|3400 (ID4)|3679 (ITGA7)|4323 (MMP14)|4488 (MSX2)|4853 (NOTCH2)|4854 (NOTCH3)|4921 (DDR2)|5080 (PAX6)|5364 (PLXNB1)|5454 (POU3F2)|5465 (PPARA)|5764 (PTN)|5803 (PTPRZ1)|5925 (RB1)|5992 (RFX4)|6657 (SOX2)|6662 …
			A	GO|GO.BP	GO:0048513	animal organ development	4.55652e-13	5.19261e-08	70	183 (AGT)|205 (AK4)|249 (ALPL)|558 (AXL)|658 (BMPR1B)|960 (CD44)|1363 (CPE)|1545 (CYP1B1)|1956 (EGFR)|2064 (ERBB2)|2173 (FABP7)|2239 (GPC4)|2260 (FGFR1)|2697 (GJA1)|2735 (GLI1)|2736 (GLI2)|2737 (GLI3)|2746 (GLUD1)|3082 (HGF)|3371 (TNC)|3373 (HYAL1)|3400 (ID4)|3679 (ITGA7)|4052 (LTBP1)|4129 (MAOB)|4323 (MMP14)|4488 (MSX2)|4853 (NOTCH2)|4854 (NOTCH3)|4921 (DDR2)|5013 (OTX1)|5080 (PAX6)|5364 (PLXNB1…
			A	GO|GO.BP	GO:0009887	animal organ morphogenesis	6.28193e-13	7.15889e-08	35	183 (AGT)|249 (ALPL)|658 (BMPR1B)|1363 (CPE)|1956 (EGFR)|2239 (GPC4)|2260 (FGFR1)|2735 (GLI1)|2736 (GLI2)|2737 (GLI3)|3082 (HGF)|3371 (TNC)|3373 (HYAL1)|3400 (ID4)|4323 (MMP14)|4488 (MSX2)|4853 (NOTCH2)|5013 (OTX1)|5080 (PAX6)|5465 (PPARA)|5654 (HTRA1)|5764 (PTN)|6662 (SOX9)|7042 (TGFB2)|7289 (TULP3)|9231 (DLG5)|10082 (GPC6)|10253 (SPRY2)|10804 (GJB6)|26018 (LRIG1)|51435 (SCARA3)|55366 (LGR4)|841…
			A	GO|GO.BP	GO:0007399	nervous system development	2.48594e-12	2.83298e-07	54	183 (AGT)|205 (AK4)|558 (AXL)|658 (BMPR1B)|1463 (NCAN)|1956 (EGFR)|2064 (ERBB2)|2173 (FABP7)|2239 (GPC4)|2260 (FGFR1)|2560 (GABRB1)|2670 (GFAP)|2735 (GLI1)|2736 (GLI2)|2737 (GLI3)|2746 (GLUD1)|3082 (HGF)|3371 (TNC)|3400 (ID4)|4129 (MAOB)|4323 (MMP14)|4853 (NOTCH2)|4854 (NOTCH3)|5013 (OTX1)|5080 (PAX6)|5364 (PLXNB1)|5454 (POU3F2)|5764 (PTN)|5803 (PTPRZ1)|5925 (RB1)|5992 (RFX4)|6507 (SLC1A3)|6538 (…
			A	GO|GO.CC	GO:0044459	plasma membrane part	7.96875e-12	9.08119e-07	60	136 (ADORA2B)|361 (AQP4)|366 (AQP9)|477 (ATP1A2)|482 (ATP1B2)|558 (AXL)|658 (BMPR1B)|960 (CD44)|1363 (CPE)|1837 (DTNA)|1956 (EGFR)|2013 (EMP2)|2064 (ERBB2)|2239 (GPC4)|2260 (FGFR1)|2560 (GABRB1)|2565 (GABRG1)|2697 (GJA1)|3679 (ITGA7)|4323 (MMP14)|4853 (NOTCH2)|4921 (DDR2)|5364 (PLXNB1)|5803 (PTPRZ1)|6507 (SLC1A3)|6509 (SLC1A4)|6517 (SLC2A4)|6538 (SLC6A11)|6542 (SLC7A2)|6563 (SLC14A1)|6565 (SLC15A…
			A	GO|GO.BP	GO:0007155	cell adhesion	9.38284e-12	1.06927e-06	40	482 (ATP1B2)|558 (AXL)|960 (CD44)|1463 (NCAN)|1545 (CYP1B1)|1956 (EGFR)|2013 (EMP2)|2064 (ERBB2)|2239 (GPC4)|2736 (GLI2)|2737 (GLI3)|3371 (TNC)|3373 (HYAL1)|3679 (ITGA7)|4323 (MMP14)|4921 (DDR2)|5364 (PLXNB1)|5465 (PPARA)|5764 (PTN)|6657 (SOX2)|6662 (SOX9)|7042 (TGFB2)|7057 (THBS1)|7060 (THBS4)|7412 (VCAM1)|7430 (EZR)|8404 (SPARCL1)|9071 (CLDN10)|9231 (DLG5)|10451 (VAV3)|23022 (PALLD)|23499 (MACF…
			A	GO|GO.BP	GO:0051239	regulation of multicellular organismal process	1.0344e-11	1.1788e-06	63	136 (ADORA2B)|183 (AGT)|477 (ATP1A2)|482 (ATP1B2)|558 (AXL)|658 (BMPR1B)|1545 (CYP1B1)|1956 (EGFR)|2013 (EMP2)|2064 (ERBB2)|2239 (GPC4)|2260 (FGFR1)|2670 (GFAP)|2697 (GJA1)|2735 (GLI1)|2736 (GLI2)|2737 (GLI3)|3082 (HGF)|3373 (HYAL1)|3400 (ID4)|3931 (LCAT)|4052 (LTBP1)|4163 (MCC)|4323 (MMP14)|4488 (MSX2)|4853 (NOTCH2)|4854 (NOTCH3)|4921 (DDR2)|5080 (PAX6)|5166 (PDK4)|5364 (PLXNB1)|5454 (POU3F2)|54…
			A	GO|GO.BP	GO:0022610	biological adhesion	1.12034e-11	1.27674e-06	40	482 (ATP1B2)|558 (AXL)|960 (CD44)|1463 (NCAN)|1545 (CYP1B1)|1956 (EGFR)|2013 (EMP2)|2064 (ERBB2)|2239 (GPC4)|2736 (GLI2)|2737 (GLI3)|3371 (TNC)|3373 (HYAL1)|3679 (ITGA7)|4323 (MMP14)|4921 (DDR2)|5364 (PLXNB1)|5465 (PPARA)|5764 (PTN)|6657 (SOX2)|6662 (SOX9)|7042 (TGFB2)|7057 (THBS1)|7060 (THBS4)|7412 (VCAM1)|7430 (EZR)|8404 (SPARCL1)|9071 (CLDN10)|9231 (DLG5)|10451 (VAV3)|23022 (PALLD)|23499 (MACF…
			A	GO|GO.BP	GO:0032502	developmental process	2.21017e-11	2.51871e-06	96	2 (A2M)|183 (AGT)|205 (AK4)|249 (ALPL)|558 (AXL)|658 (BMPR1B)|960 (CD44)|1363 (CPE)|1463 (NCAN)|1545 (CYP1B1)|1956 (EGFR)|2013 (EMP2)|2064 (ERBB2)|2173 (FABP7)|2239 (GPC4)|2260 (FGFR1)|2560 (GABRB1)|2670 (GFAP)|2697 (GJA1)|2735 (GLI1)|2736 (GLI2)|2737 (GLI3)|2746 (GLUD1)|3082 (HGF)|3371 (TNC)|3373 (HYAL1)|3400 (ID4)|3679 (ITGA7)|4052 (LTBP1)|4129 (MAOB)|4323 (MMP14)|4488 (MSX2)|4853 (NOTCH2)|4854…
			A	GO|GO.BP	GO:0022612	gland morphogenesis	3.67199e-11	4.1846e-06	13	1956 (EGFR)|2260 (FGFR1)|2735 (GLI1)|2736 (GLI2)|2737 (GLI3)|3082 (HGF)|3371 (TNC)|3400 (ID4)|4488 (MSX2)|5080 (PAX6)|5764 (PTN)|6662 (SOX9)|7042 (TGFB2)
			A	GO|GO.BP	GO:0010646	regulation of cell communication	4.12524e-11	4.70113e-06	67	2 (A2M)|136 (ADORA2B)|183 (AGT)|477 (ATP1A2)|558 (AXL)|658 (BMPR1B)|960 (CD44)|1545 (CYP1B1)|1956 (EGFR)|2013 (EMP2)|2064 (ERBB2)|2239 (GPC4)|2260 (FGFR1)|2670 (GFAP)|2697 (GJA1)|2735 (GLI1)|2736 (GLI2)|2737 (GLI3)|2746 (GLUD1)|3082 (HGF)|4052 (LTBP1)|4163 (MCC)|4323 (MMP14)|4488 (MSX2)|4828 (NMB)|4853 (NOTCH2)|4854 (NOTCH3)|4921 (DDR2)|5364 (PLXNB1)|5654 (HTRA1)|5764 (PTN)|5783 (PTPN13)|5925 (RB…
			A	GO|GO.BP	GO:0008283	cell proliferation	4.50902e-11	5.13848e-06	49	183 (AGT)|658 (BMPR1B)|1545 (CYP1B1)|1956 (EGFR)|2013 (EMP2)|2064 (ERBB2)|2173 (FABP7)|2260 (FGFR1)|2670 (GFAP)|2735 (GLI1)|2736 (GLI2)|2737 (GLI3)|3082 (HGF)|3371 (TNC)|3373 (HYAL1)|3400 (ID4)|3601 (IL15RA)|4163 (MCC)|4323 (MMP14)|4488 (MSX2)|4828 (NMB)|4854 (NOTCH3)|4921 (DDR2)|5080 (PAX6)|5364 (PLXNB1)|5454 (POU3F2)|5654 (HTRA1)|5764 (PTN)|5803 (PTPRZ1)|5925 (RB1)|6657 (SOX2)|6662 (SOX9)|7042 …
			A	GO|GO.BP	GO:0009888	tissue development	5.58327e-11	6.36269e-06	47	183 (AGT)|249 (ALPL)|658 (BMPR1B)|960 (CD44)|1545 (CYP1B1)|1956 (EGFR)|2239 (GPC4)|2260 (FGFR1)|2735 (GLI1)|2736 (GLI2)|2737 (GLI3)|3082 (HGF)|3371 (TNC)|3373 (HYAL1)|3400 (ID4)|3679 (ITGA7)|4323 (MMP14)|4488 (MSX2)|4921 (DDR2)|5080 (PAX6)|5454 (POU3F2)|5465 (PPARA)|5764 (PTN)|5925 (RB1)|6657 (SOX2)|6662 (SOX9)|7042 (TGFB2)|7227 (TRPS1)|7289 (TULP3)|7430 (EZR)|9231 (DLG5)|10082 (GPC6)|10253 (SPRY…
			A	GO|GO.BP	GO:0023051	regulation of signaling	6.44208e-11	7.34139e-06	67	2 (A2M)|136 (ADORA2B)|183 (AGT)|477 (ATP1A2)|558 (AXL)|658 (BMPR1B)|960 (CD44)|1545 (CYP1B1)|1956 (EGFR)|2013 (EMP2)|2064 (ERBB2)|2239 (GPC4)|2260 (FGFR1)|2670 (GFAP)|2697 (GJA1)|2735 (GLI1)|2736 (GLI2)|2737 (GLI3)|2746 (GLUD1)|3082 (HGF)|4052 (LTBP1)|4163 (MCC)|4323 (MMP14)|4488 (MSX2)|4828 (NMB)|4853 (NOTCH2)|4854 (NOTCH3)|4921 (DDR2)|5364 (PLXNB1)|5654 (HTRA1)|5764 (PTN)|5783 (PTPN13)|5925 (RB…
			A	GO|GO.BP	GO:0007275	multicellular organism development	7.42341e-11	8.45972e-06	86	183 (AGT)|205 (AK4)|249 (ALPL)|558 (AXL)|658 (BMPR1B)|960 (CD44)|1363 (CPE)|1463 (NCAN)|1545 (CYP1B1)|1956 (EGFR)|2013 (EMP2)|2064 (ERBB2)|2173 (FABP7)|2239 (GPC4)|2260 (FGFR1)|2560 (GABRB1)|2670 (GFAP)|2697 (GJA1)|2735 (GLI1)|2736 (GLI2)|2737 (GLI3)|2746 (GLUD1)|3082 (HGF)|3371 (TNC)|3373 (HYAL1)|3400 (ID4)|3679 (ITGA7)|4052 (LTBP1)|4129 (MAOB)|4323 (MMP14)|4488 (MSX2)|4853 (NOTCH2)|4854 (NOTCH3…
			A	GO|GO.BP	GO:2000026	regulation of multicellular organismal development	9.28234e-11	1.05782e-05	48	183 (AGT)|558 (AXL)|658 (BMPR1B)|1545 (CYP1B1)|1956 (EGFR)|2013 (EMP2)|2064 (ERBB2)|2239 (GPC4)|2260 (FGFR1)|2670 (GFAP)|2735 (GLI1)|2736 (GLI2)|2737 (GLI3)|3082 (HGF)|3373 (HYAL1)|3400 (ID4)|4323 (MMP14)|4488 (MSX2)|4853 (NOTCH2)|4854 (NOTCH3)|4921 (DDR2)|5080 (PAX6)|5364 (PLXNB1)|5454 (POU3F2)|5465 (PPARA)|5764 (PTN)|5803 (PTPRZ1)|5925 (RB1)|5992 (RFX4)|6657 (SOX2)|6662 (SOX9)|7042 (TGFB2)|7057…
			A	GO|GO.BP	GO:0001503	ossification	1.17565e-10	1.33977e-05	20	249 (ALPL)|658 (BMPR1B)|1956 (EGFR)|2735 (GLI1)|2736 (GLI2)|2737 (GLI3)|3082 (HGF)|3371 (TNC)|3400 (ID4)|4323 (MMP14)|4488 (MSX2)|4921 (DDR2)|5364 (PLXNB1)|5764 (PTN)|6657 (SOX2)|6662 (SOX9)|7042 (TGFB2)|54857 (GDPD2)|55366 (LGR4)|202151 (RANBP3L)
			A	GO|GO.BP	GO:0048856	anatomical structure development	1.73104e-10	1.97269e-05	90	183 (AGT)|205 (AK4)|249 (ALPL)|558 (AXL)|658 (BMPR1B)|960 (CD44)|1363 (CPE)|1463 (NCAN)|1545 (CYP1B1)|1956 (EGFR)|2013 (EMP2)|2064 (ERBB2)|2173 (FABP7)|2239 (GPC4)|2260 (FGFR1)|2560 (GABRB1)|2670 (GFAP)|2697 (GJA1)|2735 (GLI1)|2736 (GLI2)|2737 (GLI3)|2746 (GLUD1)|3082 (HGF)|3371 (TNC)|3373 (HYAL1)|3400 (ID4)|3679 (ITGA7)|4052 (LTBP1)|4129 (MAOB)|4323 (MMP14)|4488 (MSX2)|4853 (NOTCH2)|4854 (NOTCH3…
			A	GO|GO.BP	GO:0007166	cell surface receptor signaling pathway	1.90268e-10	2.16829e-05	59	136 (ADORA2B)|183 (AGT)|558 (AXL)|658 (BMPR1B)|960 (CD44)|1363 (CPE)|1956 (EGFR)|2013 (EMP2)|2064 (ERBB2)|2239 (GPC4)|2260 (FGFR1)|2735 (GLI1)|2736 (GLI2)|2737 (GLI3)|3082 (HGF)|3601 (IL15RA)|3679 (ITGA7)|4052 (LTBP1)|4163 (MCC)|4323 (MMP14)|4488 (MSX2)|4853 (NOTCH2)|4854 (NOTCH3)|4921 (DDR2)|5080 (PAX6)|5166 (PDK4)|5364 (PLXNB1)|5654 (HTRA1)|5764 (PTN)|5803 (PTPRZ1)|5925 (RB1)|5992 (RFX4)|6657 (…
			A	GO|GO.BP	GO:0032501	multicellular organismal process	2.06292e-10	2.35091e-05	106	2 (A2M)|136 (ADORA2B)|183 (AGT)|205 (AK4)|249 (ALPL)|361 (AQP4)|366 (AQP9)|477 (ATP1A2)|482 (ATP1B2)|558 (AXL)|658 (BMPR1B)|954 (ENTPD2)|960 (CD44)|1363 (CPE)|1463 (NCAN)|1545 (CYP1B1)|1837 (DTNA)|1956 (EGFR)|2013 (EMP2)|2064 (ERBB2)|2173 (FABP7)|2239 (GPC4)|2260 (FGFR1)|2560 (GABRB1)|2565 (GABRG1)|2670 (GFAP)|2697 (GJA1)|2735 (GLI1)|2736 (GLI2)|2737 (GLI3)|2746 (GLUD1)|3082 (HGF)|3371 (TNC)|3373…
			A	GO|GO.CC	GO:0031012	extracellular matrix	2.73268e-10	3.11416e-05	22	2 (A2M)|249 (ALPL)|954 (ENTPD2)|1463 (NCAN)|2239 (GPC4)|3371 (TNC)|4052 (LTBP1)|4323 (MMP14)|5654 (HTRA1)|5764 (PTN)|5803 (PTPRZ1)|7042 (TGFB2)|7057 (THBS1)|7060 (THBS4)|7078 (TIMP3)|8404 (SPARCL1)|9865 (TRIL)|10082 (GPC6)|26018 (LRIG1)|51435 (SCARA3)|151887 (CCDC80)|341640 (FREM2)
			A	GO|GO.BP	GO:0048583	regulation of response to stimulus	3.11701e-10	3.55214e-05	73	2 (A2M)|136 (ADORA2B)|183 (AGT)|477 (ATP1A2)|558 (AXL)|658 (BMPR1B)|720 (C4A)|721 (C4B)|960 (CD44)|1545 (CYP1B1)|1956 (EGFR)|2013 (EMP2)|2064 (ERBB2)|2173 (FABP7)|2239 (GPC4)|2260 (FGFR1)|2697 (GJA1)|2735 (GLI1)|2736 (GLI2)|2737 (GLI3)|3082 (HGF)|4052 (LTBP1)|4163 (MCC)|4323 (MMP14)|4488 (MSX2)|4828 (NMB)|4853 (NOTCH2)|4854 (NOTCH3)|4921 (DDR2)|5364 (PLXNB1)|5465 (PPARA)|5654 (HTRA1)|5764 (PTN)|5…
			A	GO|GO.BP	GO:0009966	regulation of signal transduction	3.30953e-10	3.77154e-05	61	2 (A2M)|136 (ADORA2B)|183 (AGT)|558 (AXL)|658 (BMPR1B)|960 (CD44)|1545 (CYP1B1)|1956 (EGFR)|2013 (EMP2)|2064 (ERBB2)|2239 (GPC4)|2260 (FGFR1)|2697 (GJA1)|2735 (GLI1)|2736 (GLI2)|2737 (GLI3)|3082 (HGF)|4052 (LTBP1)|4163 (MCC)|4323 (MMP14)|4488 (MSX2)|4828 (NMB)|4853 (NOTCH2)|4854 (NOTCH3)|4921 (DDR2)|5364 (PLXNB1)|5654 (HTRA1)|5764 (PTN)|5783 (PTPN13)|5925 (RB1)|5992 (RFX4)|6657 (SOX2)|6662 (SOX9)…
			A	GO|GO.BP	GO:0045595	regulation of cell differentiation	4.20121e-10	4.78769e-05	43	183 (AGT)|558 (AXL)|658 (BMPR1B)|1956 (EGFR)|2013 (EMP2)|2064 (ERBB2)|2260 (FGFR1)|2670 (GFAP)|2735 (GLI1)|2736 (GLI2)|2737 (GLI3)|3082 (HGF)|3400 (ID4)|4323 (MMP14)|4488 (MSX2)|4853 (NOTCH2)|4854 (NOTCH3)|4921 (DDR2)|5080 (PAX6)|5364 (PLXNB1)|5454 (POU3F2)|5465 (PPARA)|5764 (PTN)|5803 (PTPRZ1)|5925 (RB1)|6657 (SOX2)|6662 (SOX9)|7042 (TGFB2)|7057 (THBS1)|7227 (TRPS1)|7274 (TTPA)|9231 (DLG5)|10253…
			A	GO|GO.BP	GO:0007154	cell communication	4.34908e-10	4.95621e-05	96	2 (A2M)|136 (ADORA2B)|183 (AGT)|477 (ATP1A2)|482 (ATP1B2)|558 (AXL)|658 (BMPR1B)|954 (ENTPD2)|960 (CD44)|1363 (CPE)|1545 (CYP1B1)|1837 (DTNA)|1956 (EGFR)|2013 (EMP2)|2064 (ERBB2)|2239 (GPC4)|2260 (FGFR1)|2560 (GABRB1)|2565 (GABRG1)|2670 (GFAP)|2697 (GJA1)|2735 (GLI1)|2736 (GLI2)|2737 (GLI3)|2746 (GLUD1)|3082 (HGF)|3371 (TNC)|3601 (IL15RA)|3679 (ITGA7)|4052 (LTBP1)|4163 (MCC)|4323 (MMP14)|4488 (MS…
			A	GO|GO.BP	GO:0050896	response to stimulus	5.51748e-10	6.28772e-05	119	2 (A2M)|136 (ADORA2B)|183 (AGT)|205 (AK4)|249 (ALPL)|361 (AQP4)|366 (AQP9)|477 (ATP1A2)|558 (AXL)|658 (BMPR1B)|720 (C4A)|721 (C4B)|954 (ENTPD2)|960 (CD44)|1363 (CPE)|1545 (CYP1B1)|1837 (DTNA)|1956 (EGFR)|2013 (EMP2)|2064 (ERBB2)|2173 (FABP7)|2239 (GPC4)|2260 (FGFR1)|2560 (GABRB1)|2565 (GABRG1)|2670 (GFAP)|2697 (GJA1)|2735 (GLI1)|2736 (GLI2)|2737 (GLI3)|3082 (HGF)|3371 (TNC)|3373 (HYAL1)|3601 (IL1…
			A	GO|GO.CC	GO:0005886	plasma membrane	5.57658e-10	6.35507e-05	86	136 (ADORA2B)|249 (ALPL)|361 (AQP4)|366 (AQP9)|477 (ATP1A2)|482 (ATP1B2)|558 (AXL)|658 (BMPR1B)|720 (C4A)|721 (C4B)|954 (ENTPD2)|960 (CD44)|1363 (CPE)|1837 (DTNA)|1956 (EGFR)|2013 (EMP2)|2064 (ERBB2)|2239 (GPC4)|2260 (FGFR1)|2560 (GABRB1)|2565 (GABRG1)|2697 (GJA1)|3601 (IL15RA)|3679 (ITGA7)|3782 (KCNN3)|4163 (MCC)|4323 (MMP14)|4853 (NOTCH2)|4854 (NOTCH3)|4921 (DDR2)|5364 (PLXNB1)|5654 (HTRA1)|578…
			A	GO|GO.CC	GO:0071944	cell periphery	6.11454e-10	6.96813e-05	87	136 (ADORA2B)|249 (ALPL)|361 (AQP4)|366 (AQP9)|477 (ATP1A2)|482 (ATP1B2)|558 (AXL)|658 (BMPR1B)|720 (C4A)|721 (C4B)|954 (ENTPD2)|960 (CD44)|1363 (CPE)|1837 (DTNA)|1956 (EGFR)|2013 (EMP2)|2064 (ERBB2)|2173 (FABP7)|2239 (GPC4)|2260 (FGFR1)|2560 (GABRB1)|2565 (GABRG1)|2697 (GJA1)|3601 (IL15RA)|3679 (ITGA7)|3782 (KCNN3)|4163 (MCC)|4323 (MMP14)|4853 (NOTCH2)|4854 (NOTCH3)|4921 (DDR2)|5364 (PLXNB1)|565…
			A	GO|GO.BP	GO:0007417	central nervous system development	6.25387e-10	7.12691e-05	30	205 (AK4)|558 (AXL)|1463 (NCAN)|1956 (EGFR)|2064 (ERBB2)|2173 (FABP7)|2260 (FGFR1)|2560 (GABRB1)|2670 (GFAP)|2735 (GLI1)|2736 (GLI2)|2737 (GLI3)|2746 (GLUD1)|3400 (ID4)|4129 (MAOB)|4854 (NOTCH3)|5013 (OTX1)|5080 (PAX6)|5454 (POU3F2)|5764 (PTN)|5803 (PTPRZ1)|5992 (RFX4)|6538 (SLC6A11)|6657 (SOX2)|6662 (SOX9)|7289 (TULP3)|8660 (IRS2)|9231 (DLG5)|23657 (SLC7A11)|284612 (SYPL2)
			A	GO|GO.BP	GO:0042127	regulation of cell proliferation	7.46987e-10	8.51266e-05	41	183 (AGT)|658 (BMPR1B)|1545 (CYP1B1)|1956 (EGFR)|2013 (EMP2)|2064 (ERBB2)|2173 (FABP7)|2260 (FGFR1)|2670 (GFAP)|2735 (GLI1)|2736 (GLI2)|2737 (GLI3)|3371 (TNC)|3373 (HYAL1)|3400 (ID4)|4163 (MCC)|4488 (MSX2)|4828 (NMB)|4854 (NOTCH3)|4921 (DDR2)|5080 (PAX6)|5364 (PLXNB1)|5454 (POU3F2)|5654 (HTRA1)|5764 (PTN)|5803 (PTPRZ1)|5925 (RB1)|6657 (SOX2)|6662 (SOX9)|7042 (TGFB2)|7057 (THBS1)|7060 (THBS4)|7412…
			A	GO|GO.BP	GO:0072359	circulatory system development	9.08974e-10	0.000103587	33	183 (AGT)|1363 (CPE)|1545 (CYP1B1)|1956 (EGFR)|2013 (EMP2)|2064 (ERBB2)|2260 (FGFR1)|2697 (GJA1)|2735 (GLI1)|2736 (GLI2)|2737 (GLI3)|3082 (HGF)|3373 (HYAL1)|4052 (LTBP1)|4323 (MMP14)|4488 (MSX2)|4853 (NOTCH2)|4854 (NOTCH3)|5080 (PAX6)|5465 (PPARA)|5764 (PTN)|5925 (RB1)|6662 (SOX9)|7042 (TGFB2)|7057 (THBS1)|7060 (THBS4)|7412 (VCAM1)|10253 (SPRY2)|10451 (VAV3)|64344 (HIF3A)|154796 (AMOT)|286204 (CR…
			A	GO|GO.BP	GO:0022008	neurogenesis	1.02452e-09	0.000116754	39	183 (AGT)|558 (AXL)|658 (BMPR1B)|1956 (EGFR)|2064 (ERBB2)|2173 (FABP7)|2260 (FGFR1)|2560 (GABRB1)|2670 (GFAP)|2736 (GLI2)|2737 (GLI3)|3082 (HGF)|3371 (TNC)|3400 (ID4)|4323 (MMP14)|4854 (NOTCH3)|5080 (PAX6)|5364 (PLXNB1)|5454 (POU3F2)|5764 (PTN)|5803 (PTPRZ1)|5925 (RB1)|6507 (SLC1A3)|6657 (SOX2)|6662 (SOX9)|7042 (TGFB2)|7289 (TULP3)|7412 (VCAM1)|7430 (EZR)|8660 (IRS2)|9231 (DLG5)|23022 (PALLD)|234…
			A	GO|GO.BP	GO:0002009	morphogenesis of an epithelium	1.10037e-09	0.000125399	21	183 (AGT)|960 (CD44)|1956 (EGFR)|2239 (GPC4)|2260 (FGFR1)|2736 (GLI2)|2737 (GLI3)|3082 (HGF)|3371 (TNC)|3400 (ID4)|4323 (MMP14)|4488 (MSX2)|6662 (SOX9)|7042 (TGFB2)|7289 (TULP3)|9231 (DLG5)|10082 (GPC6)|10253 (SPRY2)|55366 (LGR4)|84133 (ZNRF3)|341640 (FREM2)
			A	GO|GO.BP	GO:0023052	signaling	1.87419e-09	0.000213583	94	2 (A2M)|136 (ADORA2B)|183 (AGT)|477 (ATP1A2)|482 (ATP1B2)|558 (AXL)|658 (BMPR1B)|954 (ENTPD2)|960 (CD44)|1363 (CPE)|1545 (CYP1B1)|1837 (DTNA)|1956 (EGFR)|2013 (EMP2)|2064 (ERBB2)|2239 (GPC4)|2260 (FGFR1)|2560 (GABRB1)|2565 (GABRG1)|2670 (GFAP)|2697 (GJA1)|2735 (GLI1)|2736 (GLI2)|2737 (GLI3)|2746 (GLUD1)|3082 (HGF)|3371 (TNC)|3601 (IL15RA)|3679 (ITGA7)|4052 (LTBP1)|4163 (MCC)|4323 (MMP14)|4488 (MS…
			A	GO|GO.BP	GO:0060322	head development	1.94916e-09	0.000222126	26	205 (AK4)|558 (AXL)|1956 (EGFR)|2173 (FABP7)|2260 (FGFR1)|2735 (GLI1)|2736 (GLI2)|2737 (GLI3)|2746 (GLUD1)|3400 (ID4)|4129 (MAOB)|4323 (MMP14)|4854 (NOTCH3)|5013 (OTX1)|5080 (PAX6)|5454 (POU3F2)|5764 (PTN)|5992 (RFX4)|6538 (SLC6A11)|6657 (SOX2)|6662 (SOX9)|7289 (TULP3)|8660 (IRS2)|9231 (DLG5)|23657 (SLC7A11)|284612 (SYPL2)
			A	GO|GO.BP	GO:0043062	extracellular structure organization	2.11216e-09	0.000240702	19	2 (A2M)|183 (AGT)|960 (CD44)|1463 (NCAN)|1545 (CYP1B1)|2670 (GFAP)|3371 (TNC)|3373 (HYAL1)|3679 (ITGA7)|3931 (LCAT)|4323 (MMP14)|4921 (DDR2)|5654 (HTRA1)|5925 (RB1)|6662 (SOX9)|7042 (TGFB2)|7057 (THBS1)|7412 (VCAM1)|151887 (CCDC80)
			A	GO|GO.BP	GO:0071310	cellular response to organic substance	2.55696e-09	0.000291391	52	183 (AGT)|249 (ALPL)|361 (AQP4)|366 (AQP9)|477 (ATP1A2)|558 (AXL)|658 (BMPR1B)|960 (CD44)|1545 (CYP1B1)|1956 (EGFR)|2064 (ERBB2)|2260 (FGFR1)|2560 (GABRB1)|2736 (GLI2)|3082 (HGF)|3371 (TNC)|3373 (HYAL1)|3601 (IL15RA)|4052 (LTBP1)|4488 (MSX2)|5080 (PAX6)|5166 (PDK4)|5454 (POU3F2)|5465 (PPARA)|5596 (MAPK4)|5654 (HTRA1)|5764 (PTN)|5783 (PTPN13)|5803 (PTPRZ1)|5925 (RB1)|6517 (SLC2A4)|6657 (SOX2)|6662…
			A	GO|GO.BP	GO:0040011	locomotion	3.12914e-09	0.000356597	43	183 (AGT)|477 (ATP1A2)|482 (ATP1B2)|558 (AXL)|658 (BMPR1B)|960 (CD44)|1545 (CYP1B1)|1956 (EGFR)|2013 (EMP2)|2064 (ERBB2)|2260 (FGFR1)|2736 (GLI2)|2737 (GLI3)|3082 (HGF)|3373 (HYAL1)|4163 (MCC)|4323 (MMP14)|4488 (MSX2)|4921 (DDR2)|5080 (PAX6)|5364 (PLXNB1)|5454 (POU3F2)|5764 (PTN)|6662 (SOX9)|7042 (TGFB2)|7057 (THBS1)|7060 (THBS4)|7412 (VCAM1)|7430 (EZR)|8660 (IRS2)|9231 (DLG5)|10082 (GPC6)|10253 …
			A	GO|GO.BP	GO:0042221	response to chemical	3.2237e-09	0.000367373	75	183 (AGT)|205 (AK4)|249 (ALPL)|361 (AQP4)|366 (AQP9)|477 (ATP1A2)|558 (AXL)|658 (BMPR1B)|721 (C4B)|960 (CD44)|1545 (CYP1B1)|1956 (EGFR)|2064 (ERBB2)|2260 (FGFR1)|2560 (GABRB1)|2736 (GLI2)|2737 (GLI3)|3082 (HGF)|3371 (TNC)|3373 (HYAL1)|3601 (IL15RA)|4052 (LTBP1)|4129 (MAOB)|4323 (MMP14)|4488 (MSX2)|5080 (PAX6)|5166 (PDK4)|5364 (PLXNB1)|5454 (POU3F2)|5465 (PPARA)|5596 (MAPK4)|5654 (HTRA1)|5764 (PTN…
			A	GO|GO.BP	GO:0048729	tissue morphogenesis	3.2393e-09	0.000369151	23	183 (AGT)|960 (CD44)|1956 (EGFR)|2239 (GPC4)|2260 (FGFR1)|2736 (GLI2)|2737 (GLI3)|3082 (HGF)|3371 (TNC)|3400 (ID4)|4323 (MMP14)|4488 (MSX2)|6662 (SOX9)|7042 (TGFB2)|7289 (TULP3)|9231 (DLG5)|10082 (GPC6)|10253 (SPRY2)|51435 (SCARA3)|55366 (LGR4)|84133 (ZNRF3)|286204 (CRB2)|341640 (FREM2)
			A	GO|GO.BP	GO:0030323	respiratory tube development	3.55235e-09	0.000404825	13	1956 (EGFR)|2260 (FGFR1)|2735 (GLI1)|2736 (GLI2)|2737 (GLI3)|3371 (TNC)|4323 (MMP14)|5764 (PTN)|6662 (SOX9)|7289 (TULP3)|9231 (DLG5)|10253 (SPRY2)|23657 (SLC7A11)
			A	GO|GO.BP	GO:0035295	tube development	4.48865e-09	0.000511526	31	183 (AGT)|1545 (CYP1B1)|1956 (EGFR)|2013 (EMP2)|2064 (ERBB2)|2260 (FGFR1)|2735 (GLI1)|2736 (GLI2)|2737 (GLI3)|3082 (HGF)|3371 (TNC)|3373 (HYAL1)|4323 (MMP14)|4488 (MSX2)|4854 (NOTCH3)|5080 (PAX6)|5764 (PTN)|5925 (RB1)|6662 (SOX9)|7042 (TGFB2)|7057 (THBS1)|7060 (THBS4)|7289 (TULP3)|9231 (DLG5)|10253 (SPRY2)|10451 (VAV3)|23657 (SLC7A11)|55366 (LGR4)|64344 (HIF3A)|154796 (AMOT)|348093 (RBPMS2)
			A	GO|GO.BP	GO:0035239	tube morphogenesis	4.55021e-09	0.000518541	28	183 (AGT)|1545 (CYP1B1)|1956 (EGFR)|2013 (EMP2)|2064 (ERBB2)|2260 (FGFR1)|2735 (GLI1)|2736 (GLI2)|2737 (GLI3)|3082 (HGF)|3371 (TNC)|3373 (HYAL1)|4323 (MMP14)|4488 (MSX2)|4854 (NOTCH3)|5764 (PTN)|6662 (SOX9)|7042 (TGFB2)|7057 (THBS1)|7060 (THBS4)|7289 (TULP3)|9231 (DLG5)|10253 (SPRY2)|10451 (VAV3)|55366 (LGR4)|64344 (HIF3A)|154796 (AMOT)|348093 (RBPMS2)
			A	GO|GO.BP	GO:0001649	osteoblast differentiation	5.26076e-09	0.000599516	14	249 (ALPL)|658 (BMPR1B)|2735 (GLI1)|2736 (GLI2)|2737 (GLI3)|3082 (HGF)|3371 (TNC)|3400 (ID4)|4488 (MSX2)|4921 (DDR2)|6657 (SOX2)|54857 (GDPD2)|55366 (LGR4)|202151 (RANBP3L)
			A	GO|GO.BP	GO:0040007	growth	6.40319e-09	0.000729707	29	183 (AGT)|658 (BMPR1B)|1956 (EGFR)|2064 (ERBB2)|2260 (FGFR1)|2697 (GJA1)|2735 (GLI1)|2736 (GLI2)|2737 (GLI3)|3371 (TNC)|3373 (HYAL1)|4323 (MMP14)|4488 (MSX2)|4853 (NOTCH2)|4921 (DDR2)|5454 (POU3F2)|5465 (PPARA)|5654 (HTRA1)|5925 (RB1)|6657 (SOX2)|6662 (SOX9)|7042 (TGFB2)|7430 (EZR)|10253 (SPRY2)|23286 (WWC1)|23499 (MACF1)|51435 (SCARA3)|57678 (GPAM)|59352 (LGR6)
			A	GO|GO.BP	GO:0010033	response to organic substance	6.70234e-09	0.000763799	58	183 (AGT)|249 (ALPL)|361 (AQP4)|366 (AQP9)|477 (ATP1A2)|558 (AXL)|658 (BMPR1B)|721 (C4B)|960 (CD44)|1545 (CYP1B1)|1956 (EGFR)|2064 (ERBB2)|2260 (FGFR1)|2560 (GABRB1)|2736 (GLI2)|3082 (HGF)|3371 (TNC)|3373 (HYAL1)|3601 (IL15RA)|4052 (LTBP1)|4129 (MAOB)|4323 (MMP14)|4488 (MSX2)|5080 (PAX6)|5166 (PDK4)|5454 (POU3F2)|5465 (PPARA)|5596 (MAPK4)|5654 (HTRA1)|5764 (PTN)|5783 (PTPN13)|5803 (PTPRZ1)|5925 (…
			A	GO|GO.BP	GO:0030182	neuron differentiation	7.33746e-09	0.000836177	34	183 (AGT)|658 (BMPR1B)|1956 (EGFR)|2064 (ERBB2)|2260 (FGFR1)|2560 (GABRB1)|2670 (GFAP)|2736 (GLI2)|2737 (GLI3)|3082 (HGF)|3371 (TNC)|3400 (ID4)|4854 (NOTCH3)|5080 (PAX6)|5364 (PLXNB1)|5454 (POU3F2)|5764 (PTN)|5803 (PTPRZ1)|5925 (RB1)|6507 (SLC1A3)|6657 (SOX2)|6662 (SOX9)|7042 (TGFB2)|7289 (TULP3)|7412 (VCAM1)|7430 (EZR)|8660 (IRS2)|9231 (DLG5)|23022 (PALLD)|23499 (MACF1)|56963 (RGMA)|91653 (BOC)|…
			A	GO|GO.BP	GO:0051094	positive regulation of developmental process	8.76886e-09	0.000999299	35	183 (AGT)|558 (AXL)|658 (BMPR1B)|1545 (CYP1B1)|2260 (FGFR1)|2670 (GFAP)|2735 (GLI1)|2736 (GLI2)|2737 (GLI3)|3082 (HGF)|3373 (HYAL1)|3400 (ID4)|4323 (MMP14)|4488 (MSX2)|4921 (DDR2)|5080 (PAX6)|5364 (PLXNB1)|5454 (POU3F2)|5764 (PTN)|5925 (RB1)|6657 (SOX2)|6662 (SOX9)|7042 (TGFB2)|7057 (THBS1)|7430 (EZR)|9231 (DLG5)|23499 (MACF1)|54857 (GDPD2)|55366 (LGR4)|57678 (GPAM)|63976 (PRDM16)|91653 (BOC)|154…
			A	GO|GO.BP	GO:0009968	negative regulation of signal transduction	8.7935e-09	0.00100211	33	183 (AGT)|558 (AXL)|960 (CD44)|1956 (EGFR)|2064 (ERBB2)|2260 (FGFR1)|2735 (GLI1)|2737 (GLI3)|3082 (HGF)|4052 (LTBP1)|4163 (MCC)|4323 (MMP14)|4854 (NOTCH3)|4921 (DDR2)|5654 (HTRA1)|5925 (RB1)|5992 (RFX4)|6657 (SOX2)|6662 (SOX9)|7042 (TGFB2)|7057 (THBS1)|7078 (TIMP3)|7289 (TULP3)|7430 (EZR)|9231 (DLG5)|10010 (TANK)|10253 (SPRY2)|23286 (WWC1)|55366 (LGR4)|63976 (PRDM16)|84133 (ZNRF3)|115265 (DDIT4L)…
			A	GO|GO.BP	GO:0051241	negative regulation of multicellular organismal process	8.96536e-09	0.00102169	33	136 (ADORA2B)|183 (AGT)|477 (ATP1A2)|558 (AXL)|1956 (EGFR)|2064 (ERBB2)|2260 (FGFR1)|2670 (GFAP)|2736 (GLI2)|2737 (GLI3)|3082 (HGF)|3400 (ID4)|4163 (MCC)|4488 (MSX2)|4854 (NOTCH3)|5080 (PAX6)|5465 (PPARA)|5764 (PTN)|5925 (RB1)|5992 (RFX4)|6657 (SOX2)|6662 (SOX9)|7042 (TGFB2)|7057 (THBS1)|7060 (THBS4)|7289 (TULP3)|7430 (EZR)|10253 (SPRY2)|23286 (WWC1)|55366 (LGR4)|56963 (RGMA)|154796 (AMOT)|202151…
			A	GO|GO.BP	GO:0016477	cell migration	9.0815e-09	0.00103493	37	183 (AGT)|482 (ATP1B2)|558 (AXL)|960 (CD44)|1545 (CYP1B1)|1956 (EGFR)|2013 (EMP2)|2260 (FGFR1)|2737 (GLI3)|3082 (HGF)|3373 (HYAL1)|4163 (MCC)|4323 (MMP14)|4488 (MSX2)|4921 (DDR2)|5080 (PAX6)|5364 (PLXNB1)|5454 (POU3F2)|5764 (PTN)|6662 (SOX9)|7042 (TGFB2)|7057 (THBS1)|7060 (THBS4)|7412 (VCAM1)|8660 (IRS2)|9231 (DLG5)|10082 (GPC6)|10253 (SPRY2)|10451 (VAV3)|23022 (PALLD)|23286 (WWC1)|23499 (MACF1)|…
			A	GO|GO.BP	GO:0030198	extracellular matrix organization	9.55895e-09	0.00108934	17	2 (A2M)|183 (AGT)|960 (CD44)|1463 (NCAN)|1545 (CYP1B1)|2670 (GFAP)|3371 (TNC)|3679 (ITGA7)|4323 (MMP14)|4921 (DDR2)|5654 (HTRA1)|5925 (RB1)|6662 (SOX9)|7042 (TGFB2)|7057 (THBS1)|7412 (VCAM1)|151887 (CCDC80)
			A	GO|GO.BP	GO:0048585	negative regulation of response to stimulus	9.80915e-09	0.00111785	38	2 (A2M)|183 (AGT)|558 (AXL)|960 (CD44)|1956 (EGFR)|2064 (ERBB2)|2173 (FABP7)|2260 (FGFR1)|2735 (GLI1)|2737 (GLI3)|3082 (HGF)|4052 (LTBP1)|4163 (MCC)|4323 (MMP14)|4854 (NOTCH3)|4921 (DDR2)|5465 (PPARA)|5654 (HTRA1)|5925 (RB1)|5992 (RFX4)|6657 (SOX2)|6662 (SOX9)|7042 (TGFB2)|7057 (THBS1)|7078 (TIMP3)|7289 (TULP3)|7430 (EZR)|9231 (DLG5)|10010 (TANK)|10253 (SPRY2)|23286 (WWC1)|23657 (SLC7A11)|55366 (…
			A	GO|GO.BP	GO:0042063	gliogenesis	1.10204e-08	0.00125588	15	1956 (EGFR)|2064 (ERBB2)|2670 (GFAP)|2737 (GLI3)|3400 (ID4)|4323 (MMP14)|5080 (PAX6)|5454 (POU3F2)|5764 (PTN)|5803 (PTPRZ1)|6657 (SOX2)|6662 (SOX9)|7042 (TGFB2)|28999 (KLF15)|163175 (LGI4)
			A	GO|GO.BP	GO:0009611	response to wounding	1.15701e-08	0.00131852	23	2 (A2M)|558 (AXL)|954 (ENTPD2)|960 (CD44)|1956 (EGFR)|2064 (ERBB2)|2670 (GFAP)|2735 (GLI1)|2737 (GLI3)|3371 (TNC)|4488 (MSX2)|5080 (PAX6)|5465 (PPARA)|6507 (SLC1A3)|6657 (SOX2)|7042 (TGFB2)|7057 (THBS1)|9060 (PAPSS2)|10451 (VAV3)|23499 (MACF1)|23657 (SLC7A11)|56963 (RGMA)|59352 (LGR6)
			A	GO|GO.BP	GO:0007420	brain development	1.28533e-08	0.00146477	24	205 (AK4)|558 (AXL)|1956 (EGFR)|2173 (FABP7)|2260 (FGFR1)|2735 (GLI1)|2736 (GLI2)|2737 (GLI3)|2746 (GLUD1)|3400 (ID4)|4129 (MAOB)|4854 (NOTCH3)|5013 (OTX1)|5080 (PAX6)|5454 (POU3F2)|5764 (PTN)|5992 (RFX4)|6538 (SLC6A11)|6657 (SOX2)|7289 (TULP3)|8660 (IRS2)|9231 (DLG5)|23657 (SLC7A11)|284612 (SYPL2)
			A	GO|GO.BP	GO:0070887	cellular response to chemical stimulus	1.31968e-08	0.00150391	57	183 (AGT)|249 (ALPL)|361 (AQP4)|366 (AQP9)|477 (ATP1A2)|558 (AXL)|658 (BMPR1B)|960 (CD44)|1545 (CYP1B1)|1956 (EGFR)|2064 (ERBB2)|2260 (FGFR1)|2560 (GABRB1)|2736 (GLI2)|3082 (HGF)|3371 (TNC)|3373 (HYAL1)|3601 (IL15RA)|4052 (LTBP1)|4488 (MSX2)|5080 (PAX6)|5166 (PDK4)|5454 (POU3F2)|5465 (PPARA)|5596 (MAPK4)|5654 (HTRA1)|5764 (PTN)|5783 (PTPN13)|5803 (PTPRZ1)|5925 (RB1)|6517 (SLC2A4)|6657 (SOX2)|6662…
			A	GO|GO.BP	GO:0008284	positive regulation of cell proliferation	1.32389e-08	0.00150871	28	183 (AGT)|1956 (EGFR)|2013 (EMP2)|2064 (ERBB2)|2260 (FGFR1)|2670 (GFAP)|2735 (GLI1)|2736 (GLI2)|2737 (GLI3)|3371 (TNC)|3373 (HYAL1)|3400 (ID4)|4828 (NMB)|4854 (NOTCH3)|4921 (DDR2)|5080 (PAX6)|5454 (POU3F2)|5654 (HTRA1)|5764 (PTN)|6662 (SOX9)|7042 (TGFB2)|7057 (THBS1)|7060 (THBS4)|7412 (VCAM1)|8660 (IRS2)|10451 (VAV3)|57678 (GPAM)|348093 (RBPMS2)
			A	GO|GO.BP	GO:0060541	respiratory system development	1.41766e-08	0.00161556	13	1956 (EGFR)|2260 (FGFR1)|2735 (GLI1)|2736 (GLI2)|2737 (GLI3)|3371 (TNC)|4323 (MMP14)|5764 (PTN)|6662 (SOX9)|7289 (TULP3)|9231 (DLG5)|10253 (SPRY2)|23657 (SLC7A11)
			A	GO|GO.BP	GO:0010648	negative regulation of cell communication	1.72048e-08	0.00196066	34	183 (AGT)|558 (AXL)|960 (CD44)|1956 (EGFR)|2064 (ERBB2)|2260 (FGFR1)|2735 (GLI1)|2737 (GLI3)|3082 (HGF)|4052 (LTBP1)|4163 (MCC)|4323 (MMP14)|4828 (NMB)|4854 (NOTCH3)|4921 (DDR2)|5654 (HTRA1)|5925 (RB1)|5992 (RFX4)|6657 (SOX2)|6662 (SOX9)|7042 (TGFB2)|7057 (THBS1)|7078 (TIMP3)|7289 (TULP3)|7430 (EZR)|9231 (DLG5)|10010 (TANK)|10253 (SPRY2)|23286 (WWC1)|55366 (LGR4)|63976 (PRDM16)|84133 (ZNRF3)|1152…
			A	GO|GO.BP	GO:0023057	negative regulation of signaling	1.84922e-08	0.00210737	34	183 (AGT)|558 (AXL)|960 (CD44)|1956 (EGFR)|2064 (ERBB2)|2260 (FGFR1)|2735 (GLI1)|2737 (GLI3)|3082 (HGF)|4052 (LTBP1)|4163 (MCC)|4323 (MMP14)|4828 (NMB)|4854 (NOTCH3)|4921 (DDR2)|5654 (HTRA1)|5925 (RB1)|5992 (RFX4)|6657 (SOX2)|6662 (SOX9)|7042 (TGFB2)|7057 (THBS1)|7078 (TIMP3)|7289 (TULP3)|7430 (EZR)|9231 (DLG5)|10010 (TANK)|10253 (SPRY2)|23286 (WWC1)|55366 (LGR4)|63976 (PRDM16)|84133 (ZNRF3)|1152…
			A	GO|GO.CC	GO:0098590	plasma membrane region	2.21979e-08	0.00252967	31	361 (AQP4)|366 (AQP9)|477 (ATP1A2)|482 (ATP1B2)|960 (CD44)|1363 (CPE)|1956 (EGFR)|2013 (EMP2)|2064 (ERBB2)|2239 (GPC4)|2560 (GABRB1)|2565 (GABRG1)|4921 (DDR2)|6538 (SLC6A11)|6563 (SLC14A1)|7430 (EZR)|8671 (SLC4A4)|9231 (DLG5)|9627 (SNCAIP)|10253 (SPRY2)|10804 (GJB6)|23209 (MLC1)|23286 (WWC1)|23499 (MACF1)|23657 (SLC7A11)|79870 (BAALC)|79901 (CYBRD1)|117583 (PARD3B)|132884 (EVC2)|254428 (SLC41A1)|…
			A	GO|GO.BP	GO:0048869	cellular developmental process	2.47697e-08	0.00282276	69	2 (A2M)|183 (AGT)|249 (ALPL)|558 (AXL)|658 (BMPR1B)|960 (CD44)|1956 (EGFR)|2013 (EMP2)|2064 (ERBB2)|2173 (FABP7)|2260 (FGFR1)|2560 (GABRB1)|2670 (GFAP)|2735 (GLI1)|2736 (GLI2)|2737 (GLI3)|3082 (HGF)|3371 (TNC)|3400 (ID4)|3679 (ITGA7)|4323 (MMP14)|4488 (MSX2)|4853 (NOTCH2)|4854 (NOTCH3)|4921 (DDR2)|5080 (PAX6)|5364 (PLXNB1)|5454 (POU3F2)|5465 (PPARA)|5654 (HTRA1)|5764 (PTN)|5803 (PTPRZ1)|5925 (RB1…
			A	GO|GO.BP	GO:0030154	cell differentiation	2.57806e-08	0.00293795	67	2 (A2M)|183 (AGT)|249 (ALPL)|558 (AXL)|658 (BMPR1B)|1956 (EGFR)|2013 (EMP2)|2064 (ERBB2)|2173 (FABP7)|2260 (FGFR1)|2560 (GABRB1)|2670 (GFAP)|2735 (GLI1)|2736 (GLI2)|2737 (GLI3)|3082 (HGF)|3371 (TNC)|3400 (ID4)|3679 (ITGA7)|4323 (MMP14)|4488 (MSX2)|4853 (NOTCH2)|4854 (NOTCH3)|4921 (DDR2)|5080 (PAX6)|5364 (PLXNB1)|5454 (POU3F2)|5465 (PPARA)|5654 (HTRA1)|5764 (PTN)|5803 (PTPRZ1)|5925 (RB1)|6507 (SLC…
			A	GO|GO.BP	GO:0050673	epithelial cell proliferation	2.59734e-08	0.00295993	18	1956 (EGFR)|2064 (ERBB2)|2173 (FABP7)|2260 (FGFR1)|2735 (GLI1)|3373 (HYAL1)|4163 (MCC)|4323 (MMP14)|5080 (PAX6)|5654 (HTRA1)|5764 (PTN)|5925 (RB1)|6657 (SOX2)|6662 (SOX9)|7042 (TGFB2)|7057 (THBS1)|7060 (THBS4)|55366 (LGR4)
			A	GO|GO.BP	GO:0051716	cellular response to stimulus	2.60079e-08	0.00296386	100	2 (A2M)|136 (ADORA2B)|183 (AGT)|249 (ALPL)|361 (AQP4)|366 (AQP9)|477 (ATP1A2)|558 (AXL)|658 (BMPR1B)|954 (ENTPD2)|960 (CD44)|1363 (CPE)|1545 (CYP1B1)|1837 (DTNA)|1956 (EGFR)|2013 (EMP2)|2064 (ERBB2)|2239 (GPC4)|2260 (FGFR1)|2560 (GABRB1)|2565 (GABRG1)|2670 (GFAP)|2697 (GJA1)|2735 (GLI1)|2736 (GLI2)|2737 (GLI3)|3082 (HGF)|3371 (TNC)|3373 (HYAL1)|3601 (IL15RA)|3679 (ITGA7)|4052 (LTBP1)|4163 (MCC)|4…
			A	GO|GO.BP	GO:0048562	embryonic organ morphogenesis	2.64082e-08	0.00300947	15	2260 (FGFR1)|2735 (GLI1)|2736 (GLI2)|2737 (GLI3)|3373 (HYAL1)|4323 (MMP14)|5013 (OTX1)|5080 (PAX6)|6662 (SOX9)|7289 (TULP3)|10253 (SPRY2)|10804 (GJB6)|26018 (LRIG1)|286204 (CRB2)|348093 (RBPMS2)
			A	GO|GO.BP	GO:0048699	generation of neurons	2.71781e-08	0.00309721	35	183 (AGT)|558 (AXL)|658 (BMPR1B)|1956 (EGFR)|2064 (ERBB2)|2260 (FGFR1)|2560 (GABRB1)|2670 (GFAP)|2736 (GLI2)|2737 (GLI3)|3082 (HGF)|3371 (TNC)|3400 (ID4)|4854 (NOTCH3)|5080 (PAX6)|5364 (PLXNB1)|5454 (POU3F2)|5764 (PTN)|5803 (PTPRZ1)|5925 (RB1)|6507 (SLC1A3)|6657 (SOX2)|6662 (SOX9)|7042 (TGFB2)|7289 (TULP3)|7412 (VCAM1)|7430 (EZR)|8660 (IRS2)|9231 (DLG5)|23022 (PALLD)|23499 (MACF1)|56963 (RGMA)|91…
			A	GO|GO.BP	GO:0030324	lung development	2.73044e-08	0.00311161	12	1956 (EGFR)|2260 (FGFR1)|2735 (GLI1)|2736 (GLI2)|2737 (GLI3)|3371 (TNC)|4323 (MMP14)|5764 (PTN)|6662 (SOX9)|9231 (DLG5)|10253 (SPRY2)|23657 (SLC7A11)
			A	GO|GO.BP	GO:0048568	embryonic organ development	2.79241e-08	0.00318223	18	1956 (EGFR)|2260 (FGFR1)|2735 (GLI1)|2736 (GLI2)|2737 (GLI3)|3373 (HYAL1)|4323 (MMP14)|5013 (OTX1)|5080 (PAX6)|6662 (SOX9)|7042 (TGFB2)|7274 (TTPA)|7289 (TULP3)|10253 (SPRY2)|10804 (GJB6)|26018 (LRIG1)|286204 (CRB2)|348093 (RBPMS2)
			A	GO|GO.BP	GO:0048598	embryonic morphogenesis	2.86959e-08	0.00327018	21	2260 (FGFR1)|2735 (GLI1)|2736 (GLI2)|2737 (GLI3)|3373 (HYAL1)|3679 (ITGA7)|4323 (MMP14)|4488 (MSX2)|5013 (OTX1)|5080 (PAX6)|6657 (SOX2)|6662 (SOX9)|7042 (TGFB2)|7289 (TULP3)|10253 (SPRY2)|10804 (GJB6)|26018 (LRIG1)|154796 (AMOT)|286204 (CRB2)|341640 (FREM2)|348093 (RBPMS2)
			A	GO|GO.BP	GO:0006928	movement of cell or subcellular component	2.9773e-08	0.00339293	44	183 (AGT)|477 (ATP1A2)|482 (ATP1B2)|558 (AXL)|658 (BMPR1B)|960 (CD44)|1545 (CYP1B1)|1956 (EGFR)|2013 (EMP2)|2064 (ERBB2)|2260 (FGFR1)|2697 (GJA1)|2736 (GLI2)|2737 (GLI3)|3082 (HGF)|3373 (HYAL1)|4163 (MCC)|4323 (MMP14)|4488 (MSX2)|4921 (DDR2)|5080 (PAX6)|5364 (PLXNB1)|5454 (POU3F2)|5764 (PTN)|6662 (SOX9)|7042 (TGFB2)|7057 (THBS1)|7060 (THBS4)|7412 (VCAM1)|7430 (EZR)|8660 (IRS2)|9231 (DLG5)|10082 (…
			A	GO|GO.CC	GO:0062023	collagen-containing extracellular matrix	3.21188e-08	0.00366026	16	2 (A2M)|954 (ENTPD2)|2239 (GPC4)|3371 (TNC)|4052 (LTBP1)|5654 (HTRA1)|5764 (PTN)|5803 (PTPRZ1)|7042 (TGFB2)|7057 (THBS1)|7060 (THBS4)|7078 (TIMP3)|8404 (SPARCL1)|10082 (GPC6)|151887 (CCDC80)|341640 (FREM2)
			A	GO|GO.BP	GO:0048870	cell motility	3.30397e-08	0.00376521	38	183 (AGT)|482 (ATP1B2)|558 (AXL)|960 (CD44)|1545 (CYP1B1)|1956 (EGFR)|2013 (EMP2)|2064 (ERBB2)|2260 (FGFR1)|2737 (GLI3)|3082 (HGF)|3373 (HYAL1)|4163 (MCC)|4323 (MMP14)|4488 (MSX2)|4921 (DDR2)|5080 (PAX6)|5364 (PLXNB1)|5454 (POU3F2)|5764 (PTN)|6662 (SOX9)|7042 (TGFB2)|7057 (THBS1)|7060 (THBS4)|7412 (VCAM1)|8660 (IRS2)|9231 (DLG5)|10082 (GPC6)|10253 (SPRY2)|10451 (VAV3)|23022 (PALLD)|23286 (WWC1)|2…
			A	GO|GO.BP	GO:0051674	localization of cell	3.30397e-08	0.00376521	38	183 (AGT)|482 (ATP1B2)|558 (AXL)|960 (CD44)|1545 (CYP1B1)|1956 (EGFR)|2013 (EMP2)|2064 (ERBB2)|2260 (FGFR1)|2737 (GLI3)|3082 (HGF)|3373 (HYAL1)|4163 (MCC)|4323 (MMP14)|4488 (MSX2)|4921 (DDR2)|5080 (PAX6)|5364 (PLXNB1)|5454 (POU3F2)|5764 (PTN)|6662 (SOX9)|7042 (TGFB2)|7057 (THBS1)|7060 (THBS4)|7412 (VCAM1)|8660 (IRS2)|9231 (DLG5)|10082 (GPC6)|10253 (SPRY2)|10451 (VAV3)|23022 (PALLD)|23286 (WWC1)|2…
			A	GO|GO.CC	GO:0031226	intrinsic component of plasma membrane	3.35608e-08	0.00382458	38	136 (ADORA2B)|366 (AQP9)|477 (ATP1A2)|482 (ATP1B2)|558 (AXL)|658 (BMPR1B)|960 (CD44)|1956 (EGFR)|2064 (ERBB2)|2239 (GPC4)|2260 (FGFR1)|2560 (GABRB1)|2565 (GABRG1)|2697 (GJA1)|3679 (ITGA7)|4323 (MMP14)|4853 (NOTCH2)|4921 (DDR2)|5364 (PLXNB1)|5803 (PTPRZ1)|6507 (SLC1A3)|6509 (SLC1A4)|6517 (SLC2A4)|6538 (SLC6A11)|6542 (SLC7A2)|6563 (SLC14A1)|6565 (SLC15A2)|7412 (VCAM1)|8671 (SLC4A4)|9953 (HS3ST3B1)|…
			A	GO|GO.BP	GO:0009719	response to endogenous stimulus	4.09072e-08	0.00466178	37	183 (AGT)|249 (ALPL)|366 (AQP9)|477 (ATP1A2)|658 (BMPR1B)|960 (CD44)|1956 (EGFR)|2064 (ERBB2)|2260 (FGFR1)|2560 (GABRB1)|3371 (TNC)|3373 (HYAL1)|4052 (LTBP1)|4129 (MAOB)|4323 (MMP14)|4488 (MSX2)|5166 (PDK4)|5465 (PPARA)|5654 (HTRA1)|5764 (PTN)|5925 (RB1)|6517 (SLC2A4)|6662 (SOX9)|7042 (TGFB2)|7057 (THBS1)|7078 (TIMP3)|7430 (EZR)|8660 (IRS2)|10253 (SPRY2)|23205 (ACSBG1)|55366 (LGR4)|56963 (RGMA)|5…
			A	GO|GO.BP	GO:0007165	signal transduction	5.0258e-08	0.0057274	86	2 (A2M)|136 (ADORA2B)|183 (AGT)|477 (ATP1A2)|558 (AXL)|658 (BMPR1B)|954 (ENTPD2)|960 (CD44)|1363 (CPE)|1545 (CYP1B1)|1837 (DTNA)|1956 (EGFR)|2013 (EMP2)|2064 (ERBB2)|2239 (GPC4)|2260 (FGFR1)|2560 (GABRB1)|2565 (GABRG1)|2697 (GJA1)|2735 (GLI1)|2736 (GLI2)|2737 (GLI3)|3082 (HGF)|3601 (IL15RA)|3679 (ITGA7)|4052 (LTBP1)|4163 (MCC)|4323 (MMP14)|4488 (MSX2)|4828 (NMB)|4853 (NOTCH2)|4854 (NOTCH3)|4921 (…
			A	GO|GO.BP	GO:0051179	localization	5.19672e-08	0.00592218	91	2 (A2M)|136 (ADORA2B)|183 (AGT)|361 (AQP4)|366 (AQP9)|477 (ATP1A2)|482 (ATP1B2)|558 (AXL)|720 (C4A)|721 (C4B)|960 (CD44)|1363 (CPE)|1545 (CYP1B1)|1956 (EGFR)|2013 (EMP2)|2064 (ERBB2)|2239 (GPC4)|2260 (FGFR1)|2560 (GABRB1)|2565 (GABRG1)|2670 (GFAP)|2697 (GJA1)|2737 (GLI3)|2746 (GLUD1)|3082 (HGF)|3373 (HYAL1)|3400 (ID4)|3782 (KCNN3)|3931 (LCAT)|4052 (LTBP1)|4129 (MAOB)|4163 (MCC)|4323 (MMP14)|4488 …
			A	GO|GO.BP	GO:0060429	epithelium development	6.16812e-08	0.00702919	31	183 (AGT)|960 (CD44)|1956 (EGFR)|2239 (GPC4)|2260 (FGFR1)|2735 (GLI1)|2736 (GLI2)|2737 (GLI3)|3082 (HGF)|3371 (TNC)|3400 (ID4)|4323 (MMP14)|4488 (MSX2)|5080 (PAX6)|5764 (PTN)|6662 (SOX9)|7042 (TGFB2)|7289 (TULP3)|7430 (EZR)|9231 (DLG5)|10082 (GPC6)|10253 (SPRY2)|23022 (PALLD)|23657 (SLC7A11)|26084 (ARHGEF26)|28999 (KLF15)|55366 (LGR4)|56898 (BDH2)|84133 (ZNRF3)|286204 (CRB2)|341640 (FREM2)
			A	GO|GO.BP	GO:0061138	morphogenesis of a branching epithelium	6.20987e-08	0.00707676	12	183 (AGT)|2260 (FGFR1)|2736 (GLI2)|2737 (GLI3)|3082 (HGF)|3371 (TNC)|4323 (MMP14)|4488 (MSX2)|6662 (SOX9)|9231 (DLG5)|10253 (SPRY2)|55366 (LGR4)
			A	GO|GO.BP	GO:0070848	response to growth factor	7.23104e-08	0.0082405	23	183 (AGT)|658 (BMPR1B)|960 (CD44)|1956 (EGFR)|2064 (ERBB2)|2260 (FGFR1)|3082 (HGF)|3371 (TNC)|3373 (HYAL1)|4052 (LTBP1)|4488 (MSX2)|5654 (HTRA1)|5764 (PTN)|6657 (SOX2)|6662 (SOX9)|7042 (TGFB2)|7057 (THBS1)|7412 (VCAM1)|10253 (SPRY2)|56963 (RGMA)|63976 (PRDM16)|286204 (CRB2)|348093 (RBPMS2)
			A	GO|GO.BP	GO:0030155	regulation of cell adhesion	7.64083e-08	0.00870749	22	960 (CD44)|1545 (CYP1B1)|2013 (EMP2)|2064 (ERBB2)|2736 (GLI2)|2737 (GLI3)|3371 (TNC)|3373 (HYAL1)|4323 (MMP14)|5364 (PLXNB1)|5465 (PPARA)|5764 (PTN)|6657 (SOX2)|6662 (SOX9)|7042 (TGFB2)|7057 (THBS1)|7412 (VCAM1)|9231 (DLG5)|10451 (VAV3)|23499 (MACF1)|57678 (GPAM)|151887 (CCDC80)
			A	GO|GO.CC	GO:0005887	integral component of plasma membrane	1.00633e-07	0.0114682	36	136 (ADORA2B)|366 (AQP9)|477 (ATP1A2)|482 (ATP1B2)|558 (AXL)|658 (BMPR1B)|960 (CD44)|1956 (EGFR)|2064 (ERBB2)|2260 (FGFR1)|2560 (GABRB1)|2565 (GABRG1)|2697 (GJA1)|3679 (ITGA7)|4323 (MMP14)|4853 (NOTCH2)|4921 (DDR2)|5364 (PLXNB1)|5803 (PTPRZ1)|6507 (SLC1A3)|6509 (SLC1A4)|6517 (SLC2A4)|6538 (SLC6A11)|6542 (SLC7A2)|6563 (SLC14A1)|6565 (SLC15A2)|7412 (VCAM1)|8671 (SLC4A4)|9953 (HS3ST3B1)|23620 (NTSR2…
			A	GO|GO.BP	GO:0010647	positive regulation of cell communication	1.10697e-07	0.012615	38	136 (ADORA2B)|183 (AGT)|558 (AXL)|658 (BMPR1B)|960 (CD44)|1545 (CYP1B1)|1956 (EGFR)|2013 (EMP2)|2064 (ERBB2)|2260 (FGFR1)|2670 (GFAP)|2697 (GJA1)|2735 (GLI1)|2746 (GLUD1)|3082 (HGF)|4488 (MSX2)|4828 (NMB)|4853 (NOTCH2)|4921 (DDR2)|5364 (PLXNB1)|5764 (PTN)|6507 (SLC1A3)|6657 (SOX2)|6662 (SOX9)|7042 (TGFB2)|7057 (THBS1)|7078 (TIMP3)|8660 (IRS2)|9231 (DLG5)|10253 (SPRY2)|10451 (VAV3)|23286 (WWC1)|23…
			A	GO|GO.BP	GO:0023056	positive regulation of signaling	1.22562e-07	0.0139671	38	136 (ADORA2B)|183 (AGT)|558 (AXL)|658 (BMPR1B)|960 (CD44)|1545 (CYP1B1)|1956 (EGFR)|2013 (EMP2)|2064 (ERBB2)|2260 (FGFR1)|2670 (GFAP)|2697 (GJA1)|2735 (GLI1)|2746 (GLUD1)|3082 (HGF)|4488 (MSX2)|4828 (NMB)|4853 (NOTCH2)|4921 (DDR2)|5364 (PLXNB1)|5764 (PTN)|6507 (SLC1A3)|6657 (SOX2)|6662 (SOX9)|7042 (TGFB2)|7057 (THBS1)|7078 (TIMP3)|8660 (IRS2)|9231 (DLG5)|10253 (SPRY2)|10451 (VAV3)|23286 (WWC1)|23…
			A	GO|GO.BP	GO:0010001	glial cell differentiation	1.25085e-07	0.0142546	12	1956 (EGFR)|2064 (ERBB2)|2670 (GFAP)|2737 (GLI3)|3400 (ID4)|5080 (PAX6)|5454 (POU3F2)|5803 (PTPRZ1)|6657 (SOX2)|6662 (SOX9)|28999 (KLF15)|163175 (LGI4)
			A	GO|GO.BP	GO:0001763	morphogenesis of a branching structure	1.39881e-07	0.0159408	12	183 (AGT)|2260 (FGFR1)|2736 (GLI2)|2737 (GLI3)|3082 (HGF)|3371 (TNC)|4323 (MMP14)|4488 (MSX2)|6662 (SOX9)|9231 (DLG5)|10253 (SPRY2)|55366 (LGR4)
			A	GO|GO.BP	GO:0048666	neuron development	1.46984e-07	0.0167503	28	183 (AGT)|658 (BMPR1B)|1956 (EGFR)|2064 (ERBB2)|2260 (FGFR1)|2560 (GABRB1)|2670 (GFAP)|2736 (GLI2)|2737 (GLI3)|3082 (HGF)|3371 (TNC)|5080 (PAX6)|5364 (PLXNB1)|5454 (POU3F2)|5764 (PTN)|5803 (PTPRZ1)|5925 (RB1)|6507 (SLC1A3)|7042 (TGFB2)|7430 (EZR)|8660 (IRS2)|9231 (DLG5)|23022 (PALLD)|23499 (MACF1)|56963 (RGMA)|91653 (BOC)|163175 (LGI4)|221074 (SLC39A12)
			A	GO|GO.BP	GO:0030900	forebrain development	1.6471e-07	0.0187703	16	558 (AXL)|1956 (EGFR)|2173 (FABP7)|2260 (FGFR1)|2735 (GLI1)|2736 (GLI2)|2737 (GLI3)|3400 (ID4)|4854 (NOTCH3)|5013 (OTX1)|5080 (PAX6)|5454 (POU3F2)|5764 (PTN)|5992 (RFX4)|6657 (SOX2)|23657 (SLC7A11)
			A	GO|GO.BP	GO:0007224	smoothened signaling pathway	1.78834e-07	0.02038	10	2735 (GLI1)|2736 (GLI2)|2737 (GLI3)|5080 (PAX6)|5925 (RB1)|5992 (RFX4)|7289 (TULP3)|9231 (DLG5)|91653 (BOC)|132884 (EVC2)
			A	GO|GO.BP	GO:0021910	smoothened signaling pathway involved in ventral spinal cord patterning	1.83369e-07	0.0208967	4	2736 (GLI2)|2737 (GLI3)|5992 (RFX4)|7289 (TULP3)
			A	GO|GO.BP	GO:0007423	sensory organ development	1.83658e-07	0.0209296	19	658 (BMPR1B)|1545 (CYP1B1)|1956 (EGFR)|2260 (FGFR1)|2736 (GLI2)|2737 (GLI3)|5013 (OTX1)|5080 (PAX6)|5764 (PTN)|6657 (SOX2)|6662 (SOX9)|7042 (TGFB2)|7289 (TULP3)|10253 (SPRY2)|10804 (GJB6)|23657 (SLC7A11)|26018 (LRIG1)|63976 (PRDM16)|341640 (FREM2)
			A	GO|GO.BP	GO:0051093	negative regulation of developmental process	1.86322e-07	0.0212332	27	183 (AGT)|1956 (EGFR)|2064 (ERBB2)|2670 (GFAP)|2736 (GLI2)|2737 (GLI3)|3400 (ID4)|4488 (MSX2)|4854 (NOTCH3)|5080 (PAX6)|5465 (PPARA)|5764 (PTN)|5925 (RB1)|5992 (RFX4)|6657 (SOX2)|6662 (SOX9)|7042 (TGFB2)|7057 (THBS1)|7060 (THBS4)|7274 (TTPA)|7289 (TULP3)|10253 (SPRY2)|23286 (WWC1)|56963 (RGMA)|154796 (AMOT)|202151 (RANBP3L)|348093 (RBPMS2)
			A	GO|GO.BP	GO:0048015	phosphatidylinositol-mediated signaling	1.8819e-07	0.0214461	11	183 (AGT)|1956 (EGFR)|2064 (ERBB2)|2260 (FGFR1)|3082 (HGF)|5364 (PLXNB1)|5783 (PTPN13)|6662 (SOX9)|7042 (TGFB2)|7430 (EZR)|8660 (IRS2)
			A	GO|GO.BP	GO:0048589	developmental growth	1.92017e-07	0.0218822	21	183 (AGT)|658 (BMPR1B)|2260 (FGFR1)|2735 (GLI1)|2736 (GLI2)|2737 (GLI3)|3371 (TNC)|4488 (MSX2)|4921 (DDR2)|5454 (POU3F2)|5465 (PPARA)|6657 (SOX2)|6662 (SOX9)|7042 (TGFB2)|7430 (EZR)|10253 (SPRY2)|23286 (WWC1)|23499 (MACF1)|51435 (SCARA3)|57678 (GPAM)|59352 (LGR6)
			A	GO|GO.BP	GO:1903825	organic acid transmembrane transport	1.92308e-07	0.0219154	10	183 (AGT)|366 (AQP9)|477 (ATP1A2)|6507 (SLC1A3)|6509 (SLC1A4)|6542 (SLC7A2)|7057 (THBS1)|8660 (IRS2)|23657 (SLC7A11)|83733 (SLC25A18)
			A	GO|GO.BP	GO:1905039	carboxylic acid transmembrane transport	1.92308e-07	0.0219154	10	183 (AGT)|366 (AQP9)|477 (ATP1A2)|6507 (SLC1A3)|6509 (SLC1A4)|6542 (SLC7A2)|7057 (THBS1)|8660 (IRS2)|23657 (SLC7A11)|83733 (SLC25A18)
			A	GO|GO.BP	GO:0007267	cell-cell signaling	2.03305e-07	0.0231686	35	136 (ADORA2B)|183 (AGT)|477 (ATP1A2)|558 (AXL)|1363 (CPE)|1837 (DTNA)|1956 (EGFR)|2239 (GPC4)|2260 (FGFR1)|2560 (GABRB1)|2565 (GABRG1)|2670 (GFAP)|2697 (GJA1)|2735 (GLI1)|2736 (GLI2)|2737 (GLI3)|2746 (GLUD1)|3082 (HGF)|3371 (TNC)|4163 (MCC)|4828 (NMB)|5764 (PTN)|6507 (SLC1A3)|6509 (SLC1A4)|6657 (SOX2)|6662 (SOX9)|7042 (TGFB2)|8660 (IRS2)|9627 (SNCAIP)|10082 (GPC6)|23499 (MACF1)|23657 (SLC7A11)|55…
			A	GO|GO.BP	GO:0048017	inositol lipid-mediated signaling	2.26073e-07	0.0257633	11	183 (AGT)|1956 (EGFR)|2064 (ERBB2)|2260 (FGFR1)|3082 (HGF)|5364 (PLXNB1)|5783 (PTPN13)|6662 (SOX9)|7042 (TGFB2)|7430 (EZR)|8660 (IRS2)
			A	GO|GO.CC	GO:0042995	cell projection	2.2629e-07	0.025788	42	477 (ATP1A2)|658 (BMPR1B)|720 (C4A)|721 (C4B)|960 (CD44)|1837 (DTNA)|2173 (FABP7)|2560 (GABRB1)|2565 (GABRG1)|2670 (GFAP)|2735 (GLI1)|2736 (GLI2)|2737 (GLI3)|3782 (KCNN3)|4163 (MCC)|4828 (NMB)|5783 (PTPN13)|6507 (SLC1A3)|6509 (SLC1A4)|6538 (SLC6A11)|7042 (TGFB2)|7289 (TULP3)|7412 (VCAM1)|7430 (EZR)|7802 (DNALI1)|9231 (DLG5)|10253 (SPRY2)|23022 (PALLD)|23286 (WWC1)|23499 (MACF1)|23657 (SLC7A11)|26…
			A	GO|GO.BP	GO:0071495	cellular response to endogenous stimulus	2.29718e-07	0.0261787	32	183 (AGT)|366 (AQP9)|477 (ATP1A2)|658 (BMPR1B)|960 (CD44)|1956 (EGFR)|2064 (ERBB2)|2260 (FGFR1)|2560 (GABRB1)|3371 (TNC)|3373 (HYAL1)|4052 (LTBP1)|4488 (MSX2)|5166 (PDK4)|5465 (PPARA)|5654 (HTRA1)|5764 (PTN)|5925 (RB1)|6517 (SLC2A4)|6662 (SOX9)|7042 (TGFB2)|7057 (THBS1)|7430 (EZR)|8660 (IRS2)|10253 (SPRY2)|55366 (LGR4)|56963 (RGMA)|57678 (GPAM)|63976 (PRDM16)|64900 (LPIN3)|286204 (CRB2)|348093 (R…
			A	GO|GO.BP	GO:0048732	gland development	2.33034e-07	0.0265566	17	205 (AK4)|1956 (EGFR)|2260 (FGFR1)|2735 (GLI1)|2736 (GLI2)|2737 (GLI3)|3082 (HGF)|3371 (TNC)|3400 (ID4)|4488 (MSX2)|5080 (PAX6)|5454 (POU3F2)|5764 (PTN)|6657 (SOX2)|6662 (SOX9)|7042 (TGFB2)|8660 (IRS2)
			A	GO|GO.BP	GO:0060348	bone development	2.66331e-07	0.0303511	12	249 (ALPL)|658 (BMPR1B)|2737 (GLI3)|4323 (MMP14)|4488 (MSX2)|4853 (NOTCH2)|5364 (PLXNB1)|6662 (SOX9)|7289 (TULP3)|9060 (PAPSS2)|51435 (SCARA3)|202151 (RANBP3L)
			A	GO|GO.BP	GO:0045597	positive regulation of cell differentiation	2.91117e-07	0.0331757	26	183 (AGT)|558 (AXL)|658 (BMPR1B)|2260 (FGFR1)|2670 (GFAP)|2736 (GLI2)|2737 (GLI3)|3082 (HGF)|3400 (ID4)|4323 (MMP14)|4488 (MSX2)|4921 (DDR2)|5080 (PAX6)|5364 (PLXNB1)|5764 (PTN)|5925 (RB1)|6657 (SOX2)|6662 (SOX9)|7042 (TGFB2)|9231 (DLG5)|23499 (MACF1)|54857 (GDPD2)|63976 (PRDM16)|91653 (BOC)|202151 (RANBP3L)|286204 (CRB2)
			A	GO|GO.BP	GO:0032879	regulation of localization	3.41844e-07	0.0389565	49	136 (ADORA2B)|183 (AGT)|477 (ATP1A2)|482 (ATP1B2)|558 (AXL)|720 (C4A)|721 (C4B)|1545 (CYP1B1)|1956 (EGFR)|2013 (EMP2)|2064 (ERBB2)|2239 (GPC4)|2260 (FGFR1)|2670 (GFAP)|2737 (GLI3)|2746 (GLUD1)|3082 (HGF)|3373 (HYAL1)|4129 (MAOB)|4163 (MCC)|4323 (MMP14)|4828 (NMB)|4921 (DDR2)|5080 (PAX6)|5364 (PLXNB1)|5465 (PPARA)|5764 (PTN)|5925 (RB1)|6517 (SLC2A4)|6662 (SOX9)|7042 (TGFB2)|7057 (THBS1)|7060 (THBS…
			A	GO|GO.BP	GO:0009605	response to external stimulus	3.43007e-07	0.039089	45	2 (A2M)|136 (ADORA2B)|183 (AGT)|249 (ALPL)|477 (ATP1A2)|558 (AXL)|658 (BMPR1B)|720 (C4A)|721 (C4B)|1956 (EGFR)|2064 (ERBB2)|2173 (FABP7)|2260 (FGFR1)|2736 (GLI2)|2737 (GLI3)|3082 (HGF)|3371 (TNC)|3373 (HYAL1)|4129 (MAOB)|4323 (MMP14)|5080 (PAX6)|5166 (PDK4)|5364 (PLXNB1)|5465 (PPARA)|5654 (HTRA1)|5764 (PTN)|5925 (RB1)|6507 (SLC1A3)|6542 (SLC7A2)|6662 (SOX9)|7042 (TGFB2)|7057 (THBS1)|7060 (THBS4)|…
			A	GO|GO.BP	GO:0048468	cell development	3.81822e-07	0.0435125	41	183 (AGT)|558 (AXL)|658 (BMPR1B)|1956 (EGFR)|2064 (ERBB2)|2260 (FGFR1)|2560 (GABRB1)|2670 (GFAP)|2736 (GLI2)|2737 (GLI3)|3082 (HGF)|3371 (TNC)|3400 (ID4)|4488 (MSX2)|4853 (NOTCH2)|4854 (NOTCH3)|5080 (PAX6)|5364 (PLXNB1)|5454 (POU3F2)|5465 (PPARA)|5764 (PTN)|5803 (PTPRZ1)|5925 (RB1)|6507 (SLC1A3)|6657 (SOX2)|6662 (SOX9)|7042 (TGFB2)|7274 (TTPA)|7430 (EZR)|8660 (IRS2)|9231 (DLG5)|23022 (PALLD)|2349…
			A	GO|GO.BP	GO:0001501	skeletal system development	4.17302e-07	0.0475558	18	249 (ALPL)|658 (BMPR1B)|960 (CD44)|2260 (FGFR1)|2736 (GLI2)|2737 (GLI3)|3373 (HYAL1)|4323 (MMP14)|4488 (MSX2)|4853 (NOTCH2)|5364 (PLXNB1)|6662 (SOX9)|7042 (TGFB2)|7227 (TRPS1)|7289 (TULP3)|9060 (PAPSS2)|51435 (SCARA3)|202151 (RANBP3L)
			EC	GO|GO.BP	GO:0072358	cardiovascular system development	6.78589e-28	7.7332e-23	61	94 (ACVRL1)|182 (JAG1)|187 (APLNR)|285 (ANGPT2)|301 (ANXA1)|302 (ANXA2)|306 (ANXA3)|857 (CAV1)|947 (CD34)|958 (CD40)|1003 (CDH5)|1282 (COL4A1)|2022 (ENG)|2050 (EPHB4)|2113 (ETS1)|2296 (FOXC1)|2321 (FLT1)|2324 (FLT4)|2335 (FN1)|2624 (GATA2)|2701 (GJA4)|2702 (GJA5)|2828 (GPR4)|3315 (HSPB1)|3339 (HSPG2)|3688 (ITGB1)|3784 (KCNQ1)|3911 (LAMA5)|3953 (LEPR)|4017 (LOXL2)|4091 (SMAD6)|4846 (NOS3)|4881 (NP…
			EC	GO|GO.BP	GO:0001568	blood vessel development	1.82737e-27	2.08247e-22	59	94 (ACVRL1)|182 (JAG1)|187 (APLNR)|285 (ANGPT2)|301 (ANXA1)|302 (ANXA2)|306 (ANXA3)|857 (CAV1)|947 (CD34)|958 (CD40)|1003 (CDH5)|1282 (COL4A1)|2022 (ENG)|2050 (EPHB4)|2113 (ETS1)|2296 (FOXC1)|2321 (FLT1)|2324 (FLT4)|2335 (FN1)|2624 (GATA2)|2701 (GJA4)|2702 (GJA5)|2828 (GPR4)|3315 (HSPB1)|3339 (HSPG2)|3688 (ITGB1)|3911 (LAMA5)|3953 (LEPR)|4017 (LOXL2)|4091 (SMAD6)|4846 (NOS3)|4881 (NPR1)|5175 (PEC…
			EC	GO|GO.BP	GO:0048514	blood vessel morphogenesis	2.549e-27	2.90485e-22	56	94 (ACVRL1)|182 (JAG1)|187 (APLNR)|285 (ANGPT2)|301 (ANXA1)|302 (ANXA2)|306 (ANXA3)|857 (CAV1)|947 (CD34)|958 (CD40)|1003 (CDH5)|1282 (COL4A1)|2022 (ENG)|2050 (EPHB4)|2113 (ETS1)|2296 (FOXC1)|2321 (FLT1)|2324 (FLT4)|2335 (FN1)|2624 (GATA2)|2702 (GJA5)|2828 (GPR4)|3315 (HSPB1)|3339 (HSPG2)|3688 (ITGB1)|3911 (LAMA5)|3953 (LEPR)|4017 (LOXL2)|4846 (NOS3)|4881 (NPR1)|5175 (PECAM1)|5547 (PRCP)|5787 (PT…
			EC	GO|GO.BP	GO:0035239	tube morphogenesis	2.58735e-27	2.94855e-22	64	94 (ACVRL1)|182 (JAG1)|187 (APLNR)|285 (ANGPT2)|301 (ANXA1)|302 (ANXA2)|306 (ANXA3)|857 (CAV1)|947 (CD34)|958 (CD40)|1003 (CDH5)|1282 (COL4A1)|2022 (ENG)|2050 (EPHB4)|2113 (ETS1)|2296 (FOXC1)|2321 (FLT1)|2324 (FLT4)|2335 (FN1)|2624 (GATA2)|2702 (GJA5)|2828 (GPR4)|3315 (HSPB1)|3339 (HSPG2)|3688 (ITGB1)|3911 (LAMA5)|3953 (LEPR)|4017 (LOXL2)|4846 (NOS3)|4881 (NPR1)|5175 (PECAM1)|5420 (PODXL)|5547 (P…
			EC	GO|GO.BP	GO:0001944	vasculature development	1.83908e-26	2.09582e-21	59	94 (ACVRL1)|182 (JAG1)|187 (APLNR)|285 (ANGPT2)|301 (ANXA1)|302 (ANXA2)|306 (ANXA3)|857 (CAV1)|947 (CD34)|958 (CD40)|1003 (CDH5)|1282 (COL4A1)|2022 (ENG)|2050 (EPHB4)|2113 (ETS1)|2296 (FOXC1)|2321 (FLT1)|2324 (FLT4)|2335 (FN1)|2624 (GATA2)|2701 (GJA4)|2702 (GJA5)|2828 (GPR4)|3315 (HSPB1)|3339 (HSPG2)|3688 (ITGB1)|3911 (LAMA5)|3953 (LEPR)|4017 (LOXL2)|4091 (SMAD6)|4846 (NOS3)|4881 (NPR1)|5175 (PEC…
			EC	GO|GO.BP	GO:0072359	circulatory system development	3.58618e-26	4.08681e-21	70	32 (ACACB)|94 (ACVRL1)|182 (JAG1)|187 (APLNR)|285 (ANGPT2)|301 (ANXA1)|302 (ANXA2)|306 (ANXA3)|857 (CAV1)|947 (CD34)|958 (CD40)|1003 (CDH5)|1282 (COL4A1)|1889 (ECE1)|2022 (ENG)|2050 (EPHB4)|2113 (ETS1)|2296 (FOXC1)|2321 (FLT1)|2324 (FLT4)|2335 (FN1)|2624 (GATA2)|2701 (GJA4)|2702 (GJA5)|2828 (GPR4)|3315 (HSPB1)|3339 (HSPG2)|3688 (ITGB1)|3764 (KCNJ8)|3784 (KCNQ1)|3911 (LAMA5)|3953 (LEPR)|4017 (LOXL…
			EC	GO|GO.BP	GO:0001525	angiogenesis	7.41971e-26	8.45551e-21	51	94 (ACVRL1)|182 (JAG1)|187 (APLNR)|285 (ANGPT2)|301 (ANXA1)|302 (ANXA2)|306 (ANXA3)|857 (CAV1)|947 (CD34)|958 (CD40)|1003 (CDH5)|1282 (COL4A1)|2022 (ENG)|2050 (EPHB4)|2113 (ETS1)|2296 (FOXC1)|2321 (FLT1)|2324 (FLT4)|2335 (FN1)|2624 (GATA2)|2702 (GJA5)|2828 (GPR4)|3315 (HSPB1)|3339 (HSPG2)|3688 (ITGB1)|3911 (LAMA5)|3953 (LEPR)|4017 (LOXL2)|4846 (NOS3)|4881 (NPR1)|5175 (PECAM1)|5547 (PRCP)|5787 (PT…
			EC	GO|GO.BP	GO:0048646	anatomical structure formation involved in morphogenesis	1.25503e-24	1.43024e-19	68	94 (ACVRL1)|182 (JAG1)|187 (APLNR)|285 (ANGPT2)|301 (ANXA1)|302 (ANXA2)|306 (ANXA3)|857 (CAV1)|947 (CD34)|958 (CD40)|1003 (CDH5)|1282 (COL4A1)|2022 (ENG)|2050 (EPHB4)|2113 (ETS1)|2296 (FOXC1)|2321 (FLT1)|2324 (FLT4)|2335 (FN1)|2624 (GATA2)|2702 (GJA5)|2828 (GPR4)|3315 (HSPB1)|3339 (HSPG2)|3688 (ITGB1)|3911 (LAMA5)|3953 (LEPR)|4017 (LOXL2)|4487 (MSX1)|4846 (NOS3)|4881 (NPR1)|5175 (PECAM1)|5420 (PO…
			EC	GO|GO.BP	GO:0035295	tube development	2.31909e-24	2.64283e-19	66	94 (ACVRL1)|182 (JAG1)|187 (APLNR)|285 (ANGPT2)|301 (ANXA1)|302 (ANXA2)|306 (ANXA3)|857 (CAV1)|947 (CD34)|958 (CD40)|1003 (CDH5)|1282 (COL4A1)|2022 (ENG)|2050 (EPHB4)|2113 (ETS1)|2296 (FOXC1)|2321 (FLT1)|2324 (FLT4)|2335 (FN1)|2624 (GATA2)|2702 (GJA5)|2828 (GPR4)|3315 (HSPB1)|3339 (HSPG2)|3688 (ITGB1)|3911 (LAMA5)|3953 (LEPR)|4017 (LOXL2)|4091 (SMAD6)|4846 (NOS3)|4881 (NPR1)|5175 (PECAM1)|5420 (P…
			EC	GO|GO.CC	GO:0071944	cell periphery	2.54668e-21	2.90219e-16	155	81 (ACTN4)|94 (ACVRL1)|125 (ADH1B)|182 (JAG1)|187 (APLNR)|285 (ANGPT2)|301 (ANXA1)|302 (ANXA2)|306 (ANXA3)|308 (ANXA5)|368 (ABCC6)|389 (RHOC)|633 (BGN)|682 (BSG)|857 (CAV1)|947 (CD34)|958 (CD40)|966 (CD59)|977 (CD151)|1003 (CDH5)|1317 (SLC31A1)|1378 (CR1)|1495 (CTNNA1)|1604 (CD55)|1889 (ECE1)|2012 (EMP1)|2022 (ENG)|2050 (EPHB4)|2321 (FLT1)|2324 (FLT4)|2335 (FN1)|2615 (LRRC32)|2701 (GJA4)|2702 (GJ…
			EC	GO|GO.BP	GO:0009653	anatomical structure morphogenesis	4.5777e-21	5.21675e-16	98	81 (ACTN4)|94 (ACVRL1)|182 (JAG1)|187 (APLNR)|285 (ANGPT2)|301 (ANXA1)|302 (ANXA2)|306 (ANXA3)|389 (RHOC)|682 (BSG)|857 (CAV1)|871 (SERPINH1)|947 (CD34)|958 (CD40)|977 (CD151)|1003 (CDH5)|1282 (COL4A1)|1495 (CTNNA1)|1889 (ECE1)|2022 (ENG)|2050 (EPHB4)|2113 (ETS1)|2296 (FOXC1)|2313 (FLI1)|2321 (FLT1)|2324 (FLT4)|2335 (FN1)|2624 (GATA2)|2702 (GJA5)|2828 (GPR4)|3315 (HSPB1)|3339 (HSPG2)|3672 (ITGA1)…
			EC	GO|GO.CC	GO:0005886	plasma membrane	9.8992e-21	1.12811e-15	152	94 (ACVRL1)|125 (ADH1B)|182 (JAG1)|187 (APLNR)|285 (ANGPT2)|301 (ANXA1)|302 (ANXA2)|306 (ANXA3)|308 (ANXA5)|368 (ABCC6)|389 (RHOC)|633 (BGN)|682 (BSG)|857 (CAV1)|947 (CD34)|958 (CD40)|966 (CD59)|977 (CD151)|1003 (CDH5)|1317 (SLC31A1)|1378 (CR1)|1495 (CTNNA1)|1604 (CD55)|1889 (ECE1)|2012 (EMP1)|2022 (ENG)|2050 (EPHB4)|2321 (FLT1)|2324 (FLT4)|2335 (FN1)|2615 (LRRC32)|2701 (GJA4)|2702 (GJA5)|2791 (G…
			EC	GO|GO.CC	GO:0044459	plasma membrane part	5.89561e-18	6.71864e-13	97	94 (ACVRL1)|182 (JAG1)|187 (APLNR)|301 (ANXA1)|302 (ANXA2)|308 (ANXA5)|368 (ABCC6)|389 (RHOC)|682 (BSG)|857 (CAV1)|947 (CD34)|958 (CD40)|966 (CD59)|977 (CD151)|1003 (CDH5)|1317 (SLC31A1)|1378 (CR1)|1495 (CTNNA1)|1889 (ECE1)|2022 (ENG)|2050 (EPHB4)|2321 (FLT1)|2324 (FLT4)|2335 (FN1)|2615 (LRRC32)|2701 (GJA4)|2702 (GJA5)|2791 (GNG11)|2828 (GPR4)|3339 (HSPG2)|3384 (ICAM2)|3454 (IFNAR1)|3480 (IGF1R)|…
			EC	GO|GO.BP	GO:0050896	response to stimulus	4.22873e-17	4.81906e-12	198	32 (ACACB)|81 (ACTN4)|94 (ACVRL1)|182 (JAG1)|187 (APLNR)|285 (ANGPT2)|301 (ANXA1)|302 (ANXA2)|306 (ANXA3)|308 (ANXA5)|368 (ABCC6)|389 (RHOC)|682 (BSG)|839 (CASP6)|840 (CASP7)|857 (CAV1)|871 (SERPINH1)|947 (CD34)|958 (CD40)|966 (CD59)|977 (CD151)|1003 (CDH5)|1030 (CDKN2B)|1282 (COL4A1)|1317 (SLC31A1)|1378 (CR1)|1390 (CREM)|1495 (CTNNA1)|1604 (CD55)|1997 (ELF1)|2022 (ENG)|2050 (EPHB4)|2078 (ERG)|21…
			EC	GO|GO.BP	GO:0007155	cell adhesion	6.17081e-17	7.03226e-12	63	81 (ACTN4)|94 (ACVRL1)|182 (JAG1)|285 (ANGPT2)|301 (ANXA1)|302 (ANXA2)|306 (ANXA3)|682 (BSG)|857 (CAV1)|947 (CD34)|977 (CD151)|1003 (CDH5)|1495 (CTNNA1)|1604 (CD55)|1842 (ECM2)|2022 (ENG)|2050 (EPHB4)|2113 (ETS1)|2335 (FN1)|2615 (LRRC32)|3315 (HSPB1)|3384 (ICAM2)|3490 (IGFBP7)|3672 (ITGA1)|3688 (ITGB1)|3717 (JAK2)|3910 (LAMA4)|3911 (LAMA5)|3915 (LAMC1)|3987 (LIMS1)|4017 (LOXL2)|4059 (BCAM)|4091 (…
			EC	GO|GO.CC	GO:0062023	collagen-containing extracellular matrix	7.47782e-17	8.52173e-12	31	301 (ANXA1)|302 (ANXA2)|308 (ANXA5)|633 (BGN)|871 (SERPINH1)|977 (CD151)|1282 (COL4A1)|1842 (ECM2)|2335 (FN1)|3339 (HSPG2)|3490 (IGFBP7)|3910 (LAMA4)|3911 (LAMA5)|3915 (LAMC1)|4017 (LOXL2)|4059 (BCAM)|4256 (MGP)|4811 (NID1)|5265 (SERPINA1)|5269 (SERPINB6)|5272 (SERPINB9)|7041 (TGFB1I1)|7076 (TIMP1)|7450 (VWF)|10516 (FBLN5)|22915 (MMRN1)|56999 (ADAMTS9)|64129 (TINAGL1)|79812 (MMRN2)|83872 (HMCN1)|…
			EC	GO|GO.BP	GO:0022610	biological adhesion	8.14132e-17	9.27785e-12	63	81 (ACTN4)|94 (ACVRL1)|182 (JAG1)|285 (ANGPT2)|301 (ANXA1)|302 (ANXA2)|306 (ANXA3)|682 (BSG)|857 (CAV1)|947 (CD34)|977 (CD151)|1003 (CDH5)|1495 (CTNNA1)|1604 (CD55)|1842 (ECM2)|2022 (ENG)|2050 (EPHB4)|2113 (ETS1)|2335 (FN1)|2615 (LRRC32)|3315 (HSPB1)|3384 (ICAM2)|3490 (IGFBP7)|3672 (ITGA1)|3688 (ITGB1)|3717 (JAK2)|3910 (LAMA4)|3911 (LAMA5)|3915 (LAMC1)|3987 (LIMS1)|4017 (LOXL2)|4059 (BCAM)|4091 (…
			EC	GO|GO.BP	GO:0050793	regulation of developmental process	3.14447e-16	3.58344e-11	89	32 (ACACB)|81 (ACTN4)|94 (ACVRL1)|182 (JAG1)|187 (APLNR)|285 (ANGPT2)|301 (ANXA1)|302 (ANXA2)|306 (ANXA3)|389 (RHOC)|663 (BNIP2)|857 (CAV1)|947 (CD34)|958 (CD40)|1003 (CDH5)|1378 (CR1)|1495 (CTNNA1)|2022 (ENG)|2113 (ETS1)|2296 (FOXC1)|2321 (FLT1)|2324 (FLT4)|2335 (FN1)|2624 (GATA2)|2828 (GPR4)|3315 (HSPB1)|3339 (HSPG2)|3665 (IRF7)|3688 (ITGB1)|3717 (JAK2)|3910 (LAMA4)|3911 (LAMA5)|3987 (LIMS1)|40…
			EC	GO|GO.BP	GO:0051270	regulation of cellular component movement	3.76466e-16	4.2902e-11	53	81 (ACTN4)|94 (ACVRL1)|182 (JAG1)|285 (ANGPT2)|301 (ANXA1)|306 (ANXA3)|308 (ANXA5)|389 (RHOC)|857 (CAV1)|958 (CD40)|977 (CD151)|1495 (CTNNA1)|2022 (ENG)|2113 (ETS1)|2321 (FLT1)|2324 (FLT4)|2335 (FN1)|2624 (GATA2)|2702 (GJA5)|3315 (HSPB1)|3480 (IGF1R)|3554 (IL1R1)|3717 (JAK2)|3910 (LAMA4)|3911 (LAMA5)|4846 (NOS3)|5175 (PECAM1)|5420 (PODXL)|5547 (PRCP)|6237 (RRAS)|6591 (SNAI2)|7010 (TEK)|7049 (TGFB…
			EC	GO|GO.BP	GO:0032502	developmental process	4.20765e-16	4.79504e-11	153	32 (ACACB)|81 (ACTN4)|94 (ACVRL1)|182 (JAG1)|187 (APLNR)|285 (ANGPT2)|301 (ANXA1)|302 (ANXA2)|306 (ANXA3)|389 (RHOC)|663 (BNIP2)|682 (BSG)|839 (CASP6)|857 (CAV1)|871 (SERPINH1)|947 (CD34)|958 (CD40)|977 (CD151)|1003 (CDH5)|1030 (CDKN2B)|1282 (COL4A1)|1378 (CR1)|1390 (CREM)|1495 (CTNNA1)|1879 (EBF1)|1889 (ECE1)|1997 (ELF1)|2012 (EMP1)|2022 (ENG)|2050 (EPHB4)|2078 (ERG)|2113 (ETS1)|2122 (MECOM)|229…
			EC	GO|GO.BP	GO:0045765	regulation of angiogenesis	4.95701e-16	5.649e-11	32	94 (ACVRL1)|187 (APLNR)|285 (ANGPT2)|301 (ANXA1)|306 (ANXA3)|947 (CD34)|958 (CD40)|1003 (CDH5)|2022 (ENG)|2113 (ETS1)|2296 (FOXC1)|2321 (FLT1)|2624 (GATA2)|2828 (GPR4)|3315 (HSPB1)|3339 (HSPG2)|3688 (ITGB1)|4846 (NOS3)|4881 (NPR1)|6237 (RRAS)|7010 (TEK)|7075 (TIE1)|7424 (VEGFC)|11235 (PDCD10)|25865 (PRKD2)|29775 (CARD10)|51129 (ANGPTL4)|54567 (DLL4)|56999 (ADAMTS9)|57381 (RHOJ)|79812 (MMRN2)|9062…
			EC	GO|GO.BP	GO:2000145	regulation of cell motility	1.10093e-15	1.25462e-10	50	81 (ACTN4)|94 (ACVRL1)|182 (JAG1)|285 (ANGPT2)|301 (ANXA1)|306 (ANXA3)|308 (ANXA5)|389 (RHOC)|857 (CAV1)|958 (CD40)|977 (CD151)|1495 (CTNNA1)|2022 (ENG)|2113 (ETS1)|2321 (FLT1)|2324 (FLT4)|2335 (FN1)|2624 (GATA2)|3315 (HSPB1)|3480 (IGF1R)|3554 (IL1R1)|3717 (JAK2)|3910 (LAMA4)|3911 (LAMA5)|4846 (NOS3)|5175 (PECAM1)|5420 (PODXL)|5547 (PRCP)|6237 (RRAS)|6591 (SNAI2)|7010 (TEK)|7075 (TIE1)|7076 (TIMP…
			EC	GO|GO.BP	GO:0048856	anatomical structure development	1.91353e-15	2.18066e-10	145	32 (ACACB)|81 (ACTN4)|94 (ACVRL1)|182 (JAG1)|187 (APLNR)|285 (ANGPT2)|301 (ANXA1)|302 (ANXA2)|306 (ANXA3)|389 (RHOC)|663 (BNIP2)|682 (BSG)|839 (CASP6)|857 (CAV1)|871 (SERPINH1)|947 (CD34)|958 (CD40)|977 (CD151)|1003 (CDH5)|1030 (CDKN2B)|1282 (COL4A1)|1378 (CR1)|1390 (CREM)|1495 (CTNNA1)|1879 (EBF1)|1889 (ECE1)|2012 (EMP1)|2022 (ENG)|2050 (EPHB4)|2078 (ERG)|2113 (ETS1)|2122 (MECOM)|2296 (FOXC1)|23…
			EC	GO|GO.BP	GO:0051239	regulation of multicellular organismal process	2.11892e-15	2.41472e-10	97	32 (ACACB)|94 (ACVRL1)|182 (JAG1)|187 (APLNR)|285 (ANGPT2)|301 (ANXA1)|302 (ANXA2)|306 (ANXA3)|308 (ANXA5)|857 (CAV1)|947 (CD34)|958 (CD40)|1003 (CDH5)|1378 (CR1)|1495 (CTNNA1)|1889 (ECE1)|1997 (ELF1)|2022 (ENG)|2113 (ETS1)|2296 (FOXC1)|2321 (FLT1)|2324 (FLT4)|2335 (FN1)|2615 (LRRC32)|2624 (GATA2)|2702 (GJA5)|2828 (GPR4)|3315 (HSPB1)|3339 (HSPG2)|3480 (IGF1R)|3554 (IL1R1)|3665 (IRF7)|3688 (ITGB1)…
			EC	GO|GO.BP	GO:0022603	regulation of anatomical structure morphogenesis	2.22993e-15	2.54123e-10	53	81 (ACTN4)|94 (ACVRL1)|182 (JAG1)|187 (APLNR)|285 (ANGPT2)|301 (ANXA1)|306 (ANXA3)|389 (RHOC)|947 (CD34)|958 (CD40)|1003 (CDH5)|2022 (ENG)|2113 (ETS1)|2296 (FOXC1)|2321 (FLT1)|2324 (FLT4)|2335 (FN1)|2624 (GATA2)|2828 (GPR4)|3315 (HSPB1)|3339 (HSPG2)|3688 (ITGB1)|3987 (LIMS1)|4487 (MSX1)|4846 (NOS3)|4881 (NPR1)|4982 (TNFRSF11B)|6237 (RRAS)|6591 (SNAI2)|6909 (TBX2)|7010 (TEK)|7075 (TIE1)|7424 (VEGF…
			EC	GO|GO.CC	GO:0031012	extracellular matrix	2.80492e-15	3.19649e-10	35	301 (ANXA1)|302 (ANXA2)|308 (ANXA5)|633 (BGN)|871 (SERPINH1)|977 (CD151)|1282 (COL4A1)|1842 (ECM2)|2335 (FN1)|2615 (LRRC32)|3339 (HSPG2)|3490 (IGFBP7)|3910 (LAMA4)|3911 (LAMA5)|3915 (LAMC1)|4017 (LOXL2)|4059 (BCAM)|4256 (MGP)|4811 (NID1)|4982 (TNFRSF11B)|5265 (SERPINA1)|5269 (SERPINB6)|5272 (SERPINB9)|7041 (TGFB1I1)|7049 (TGFBR3)|7076 (TIMP1)|7450 (VWF)|10516 (FBLN5)|22915 (MMRN1)|56999 (ADAMTS9)…
			EC	GO|GO.BP	GO:0048870	cell motility	3.882e-15	4.42393e-10	67	81 (ACTN4)|94 (ACVRL1)|182 (JAG1)|285 (ANGPT2)|301 (ANXA1)|306 (ANXA3)|308 (ANXA5)|389 (RHOC)|682 (BSG)|857 (CAV1)|947 (CD34)|958 (CD40)|977 (CD151)|1495 (CTNNA1)|2022 (ENG)|2050 (EPHB4)|2113 (ETS1)|2296 (FOXC1)|2321 (FLT1)|2324 (FLT4)|2335 (FN1)|2624 (GATA2)|3315 (HSPB1)|3480 (IGF1R)|3554 (IL1R1)|3672 (ITGA1)|3688 (ITGB1)|3717 (JAK2)|3910 (LAMA4)|3911 (LAMA5)|3915 (LAMC1)|4017 (LOXL2)|4846 (NOS3…
			EC	GO|GO.BP	GO:0051674	localization of cell	3.882e-15	4.42393e-10	67	81 (ACTN4)|94 (ACVRL1)|182 (JAG1)|285 (ANGPT2)|301 (ANXA1)|306 (ANXA3)|308 (ANXA5)|389 (RHOC)|682 (BSG)|857 (CAV1)|947 (CD34)|958 (CD40)|977 (CD151)|1495 (CTNNA1)|2022 (ENG)|2050 (EPHB4)|2113 (ETS1)|2296 (FOXC1)|2321 (FLT1)|2324 (FLT4)|2335 (FN1)|2624 (GATA2)|3315 (HSPB1)|3480 (IGF1R)|3554 (IL1R1)|3672 (ITGA1)|3688 (ITGB1)|3717 (JAK2)|3910 (LAMA4)|3911 (LAMA5)|3915 (LAMC1)|4017 (LOXL2)|4846 (NOS3…
			EC	GO|GO.BP	GO:0040012	regulation of locomotion	4.74175e-15	5.4037e-10	51	81 (ACTN4)|94 (ACVRL1)|182 (JAG1)|285 (ANGPT2)|301 (ANXA1)|306 (ANXA3)|308 (ANXA5)|389 (RHOC)|857 (CAV1)|958 (CD40)|977 (CD151)|1495 (CTNNA1)|2022 (ENG)|2113 (ETS1)|2321 (FLT1)|2324 (FLT4)|2335 (FN1)|2624 (GATA2)|3315 (HSPB1)|3480 (IGF1R)|3554 (IL1R1)|3717 (JAK2)|3910 (LAMA4)|3911 (LAMA5)|4846 (NOS3)|5175 (PECAM1)|5420 (PODXL)|5547 (PRCP)|6237 (RRAS)|6591 (SNAI2)|7010 (TEK)|7075 (TIE1)|7076 (TIMP…
			EC	GO|GO.BP	GO:0048583	regulation of response to stimulus	6.93597e-15	7.90423e-10	117	81 (ACTN4)|94 (ACVRL1)|182 (JAG1)|187 (APLNR)|285 (ANGPT2)|301 (ANXA1)|302 (ANXA2)|306 (ANXA3)|308 (ANXA5)|389 (RHOC)|857 (CAV1)|947 (CD34)|958 (CD40)|966 (CD59)|1003 (CDH5)|1030 (CDKN2B)|1378 (CR1)|1495 (CTNNA1)|1604 (CD55)|1997 (ELF1)|2022 (ENG)|2050 (EPHB4)|2113 (ETS1)|2122 (MECOM)|2321 (FLT1)|2324 (FLT4)|2335 (FN1)|2624 (GATA2)|2828 (GPR4)|3090 (HIC1)|3315 (HSPB1)|3384 (ICAM2)|3426 (CFI)|3480…
			EC	GO|GO.BP	GO:0016477	cell migration	7.22206e-15	8.23026e-10	63	81 (ACTN4)|94 (ACVRL1)|182 (JAG1)|285 (ANGPT2)|301 (ANXA1)|306 (ANXA3)|389 (RHOC)|682 (BSG)|857 (CAV1)|947 (CD34)|958 (CD40)|977 (CD151)|2022 (ENG)|2050 (EPHB4)|2113 (ETS1)|2296 (FOXC1)|2321 (FLT1)|2324 (FLT4)|2335 (FN1)|2624 (GATA2)|3315 (HSPB1)|3480 (IGF1R)|3554 (IL1R1)|3672 (ITGA1)|3688 (ITGB1)|3717 (JAK2)|3910 (LAMA4)|3911 (LAMA5)|3915 (LAMC1)|4017 (LOXL2)|4846 (NOS3)|5175 (PECAM1)|5420 (PODX…
			EC	GO|GO.BP	GO:0031589	cell-substrate adhesion	7.26958e-15	8.28441e-10	29	81 (ACTN4)|94 (ACVRL1)|182 (JAG1)|285 (ANGPT2)|947 (CD34)|1842 (ECM2)|2335 (FN1)|3672 (ITGA1)|3688 (ITGB1)|3717 (JAK2)|3911 (LAMA5)|3915 (LAMC1)|3987 (LIMS1)|4059 (BCAM)|4091 (SMAD6)|4811 (NID1)|5175 (PECAM1)|7010 (TEK)|7402 (UTRN)|7450 (VWF)|8322 (FZD4)|8826 (IQGAP1)|10395 (DLC1)|10516 (FBLN5)|22915 (MMRN1)|29984 (RHOD)|56999 (ADAMTS9)|79812 (MMRN2)|340485 (ACER2)
			EC	GO|GO.BP	GO:1901342	regulation of vasculature development	8.40459e-15	9.57787e-10	32	94 (ACVRL1)|187 (APLNR)|285 (ANGPT2)|301 (ANXA1)|306 (ANXA3)|947 (CD34)|958 (CD40)|1003 (CDH5)|2022 (ENG)|2113 (ETS1)|2296 (FOXC1)|2321 (FLT1)|2624 (GATA2)|2828 (GPR4)|3315 (HSPB1)|3339 (HSPG2)|3688 (ITGB1)|4846 (NOS3)|4881 (NPR1)|6237 (RRAS)|7010 (TEK)|7075 (TIE1)|7424 (VEGFC)|11235 (PDCD10)|25865 (PRKD2)|29775 (CARD10)|51129 (ANGPTL4)|54567 (DLL4)|56999 (ADAMTS9)|57381 (RHOJ)|79812 (MMRN2)|9062…
			EC	GO|GO.BP	GO:0043542	endothelial cell migration	8.81232e-15	1.00425e-09	26	94 (ACVRL1)|285 (ANGPT2)|301 (ANXA1)|306 (ANXA3)|958 (CD40)|2050 (EPHB4)|2113 (ETS1)|2324 (FLT4)|2624 (GATA2)|3315 (HSPB1)|3688 (ITGB1)|4017 (LOXL2)|4846 (NOS3)|5175 (PECAM1)|5547 (PRCP)|7010 (TEK)|7424 (VEGFC)|11235 (PDCD10)|25865 (PRKD2)|29775 (CARD10)|54567 (DLL4)|56999 (ADAMTS9)|57381 (RHOJ)|79812 (MMRN2)|90627 (STARD13)|161198 (CLEC14A)
			EC	GO|GO.BP	GO:0030334	regulation of cell migration	9.03511e-15	1.02964e-09	47	81 (ACTN4)|94 (ACVRL1)|182 (JAG1)|285 (ANGPT2)|301 (ANXA1)|306 (ANXA3)|389 (RHOC)|857 (CAV1)|958 (CD40)|977 (CD151)|2022 (ENG)|2113 (ETS1)|2321 (FLT1)|2324 (FLT4)|2335 (FN1)|2624 (GATA2)|3315 (HSPB1)|3480 (IGF1R)|3554 (IL1R1)|3717 (JAK2)|3910 (LAMA4)|3911 (LAMA5)|4846 (NOS3)|5175 (PECAM1)|5420 (PODXL)|5547 (PRCP)|6237 (RRAS)|6591 (SNAI2)|7010 (TEK)|7075 (TIE1)|7076 (TIMP1)|7424 (VEGFC)|8519 (IFIT…
			EC	GO|GO.BP	GO:0006950	response to stress	2.19808e-14	2.50493e-09	110	81 (ACTN4)|94 (ACVRL1)|285 (ANGPT2)|301 (ANXA1)|302 (ANXA2)|306 (ANXA3)|308 (ANXA5)|389 (RHOC)|857 (CAV1)|871 (SERPINH1)|947 (CD34)|958 (CD40)|966 (CD59)|977 (CD151)|1003 (CDH5)|1378 (CR1)|1495 (CTNNA1)|1604 (CD55)|2113 (ETS1)|2122 (MECOM)|2324 (FLT4)|2335 (FN1)|2624 (GATA2)|2634 (GBP2)|2701 (GJA4)|2828 (GPR4)|3090 (HIC1)|3315 (HSPB1)|3339 (HSPG2)|3384 (ICAM2)|3426 (CFI)|3454 (IFNAR1)|3480 (IGF1R…
			EC	GO|GO.MF	GO:0005515	protein binding	2.83675e-14	3.23276e-09	225	32 (ACACB)|81 (ACTN4)|94 (ACVRL1)|182 (JAG1)|285 (ANGPT2)|301 (ANXA1)|302 (ANXA2)|306 (ANXA3)|308 (ANXA5)|389 (RHOC)|663 (BNIP2)|682 (BSG)|689 (BTF3)|822 (CAPG)|831 (CAST)|839 (CASP6)|840 (CASP7)|857 (CAV1)|871 (SERPINH1)|947 (CD34)|958 (CD40)|966 (CD59)|977 (CD151)|1003 (CDH5)|1030 (CDKN2B)|1163 (CKS1B)|1282 (COL4A1)|1317 (SLC31A1)|1378 (CR1)|1390 (CREM)|1495 (CTNNA1)|1604 (CD55)|1842 (ECM2)|187…
			EC	GO|GO.BP	GO:0040011	locomotion	4.20484e-14	4.79183e-09	70	81 (ACTN4)|94 (ACVRL1)|182 (JAG1)|285 (ANGPT2)|301 (ANXA1)|306 (ANXA3)|308 (ANXA5)|389 (RHOC)|682 (BSG)|857 (CAV1)|947 (CD34)|958 (CD40)|977 (CD151)|1495 (CTNNA1)|2022 (ENG)|2050 (EPHB4)|2113 (ETS1)|2296 (FOXC1)|2321 (FLT1)|2324 (FLT4)|2335 (FN1)|2624 (GATA2)|3315 (HSPB1)|3480 (IGF1R)|3554 (IL1R1)|3672 (ITGA1)|3688 (ITGB1)|3717 (JAK2)|3910 (LAMA4)|3911 (LAMA5)|3915 (LAMC1)|4017 (LOXL2)|4846 (NOS3…
			EC	GO|GO.BP	GO:0034329	cell junction assembly	4.92977e-14	5.61797e-09	24	81 (ACTN4)|94 (ACVRL1)|389 (RHOC)|857 (CAV1)|977 (CD151)|1003 (CDH5)|1495 (CTNNA1)|2335 (FN1)|2701 (GJA4)|2702 (GJA5)|3911 (LAMA5)|3915 (LAMC1)|3987 (LIMS1)|5583 (PRKCH)|6591 (SNAI2)|7010 (TEK)|7122 (CLDN5)|8826 (IQGAP1)|10395 (DLC1)|29984 (RHOD)|51599 (LSR)|57493 (HEG1)|153562 (MARVELD2)|100506658 (OCLN)
			EC	GO|GO.BP	GO:0010033	response to organic substance	8.54755e-14	9.74079e-09	95	32 (ACACB)|94 (ACVRL1)|182 (JAG1)|285 (ANGPT2)|301 (ANXA1)|302 (ANXA2)|306 (ANXA3)|308 (ANXA5)|682 (BSG)|839 (CASP6)|840 (CASP7)|857 (CAV1)|871 (SERPINH1)|958 (CD40)|1003 (CDH5)|1030 (CDKN2B)|1282 (COL4A1)|1495 (CTNNA1)|1604 (CD55)|1997 (ELF1)|2022 (ENG)|2113 (ETS1)|2296 (FOXC1)|2321 (FLT1)|2324 (FLT4)|2335 (FN1)|2615 (LRRC32)|2624 (GATA2)|2634 (GBP2)|3315 (HSPB1)|3454 (IFNAR1)|3480 (IGF1R)|3490 …
			EC	GO|GO.CC	GO:0031982	vesicle	1.20637e-13	1.37478e-08	107	81 (ACTN4)|301 (ANXA1)|302 (ANXA2)|306 (ANXA3)|308 (ANXA5)|389 (RHOC)|633 (BGN)|682 (BSG)|822 (CAPG)|857 (CAV1)|958 (CD40)|966 (CD59)|1317 (SLC31A1)|1378 (CR1)|1495 (CTNNA1)|1604 (CD55)|1889 (ECE1)|2050 (EPHB4)|2321 (FLT1)|2335 (FN1)|2632 (GBE1)|3315 (HSPB1)|3339 (HSPG2)|3426 (CFI)|3454 (IFNAR1)|3490 (IGFBP7)|3665 (IRF7)|3672 (ITGA1)|3688 (ITGB1)|3717 (JAK2)|3784 (KCNQ1)|3910 (LAMA4)|3911 (LAMA5)…
			EC	GO|GO.BP	GO:0070887	cellular response to chemical stimulus	1.37399e-13	1.5658e-08	94	94 (ACVRL1)|285 (ANGPT2)|301 (ANXA1)|302 (ANXA2)|308 (ANXA5)|839 (CASP6)|840 (CASP7)|857 (CAV1)|947 (CD34)|958 (CD40)|1003 (CDH5)|1030 (CDKN2B)|1282 (COL4A1)|1317 (SLC31A1)|1495 (CTNNA1)|1604 (CD55)|1997 (ELF1)|2022 (ENG)|2113 (ETS1)|2296 (FOXC1)|2321 (FLT1)|2324 (FLT4)|2335 (FN1)|2615 (LRRC32)|2634 (GBP2)|3315 (HSPB1)|3454 (IFNAR1)|3480 (IGF1R)|3490 (IGFBP7)|3554 (IL1R1)|3665 (IRF7)|3672 (ITGA1)…
			EC	GO|GO.BP	GO:0003158	endothelium development	1.6879e-13	1.92354e-08	18	94 (ACVRL1)|182 (JAG1)|302 (ANXA2)|947 (CD34)|1003 (CDH5)|2022 (ENG)|2701 (GJA4)|2702 (GJA5)|3911 (LAMA5)|5175 (PECAM1)|7122 (CLDN5)|25865 (PRKD2)|30061 (SLC40A1)|57493 (HEG1)|64321 (SOX17)|81575 (APOLD1)|90627 (STARD13)|153562 (MARVELD2)
			EC	GO|GO.BP	GO:0048518	positive regulation of biological process	1.84999e-13	2.10825e-08	144	32 (ACACB)|81 (ACTN4)|94 (ACVRL1)|182 (JAG1)|187 (APLNR)|285 (ANGPT2)|301 (ANXA1)|302 (ANXA2)|306 (ANXA3)|308 (ANXA5)|389 (RHOC)|663 (BNIP2)|857 (CAV1)|947 (CD34)|958 (CD40)|966 (CD59)|977 (CD151)|1003 (CDH5)|1030 (CDKN2B)|1163 (CKS1B)|1378 (CR1)|1390 (CREM)|1495 (CTNNA1)|1604 (CD55)|1842 (ECM2)|1879 (EBF1)|1889 (ECE1)|1997 (ELF1)|2022 (ENG)|2050 (EPHB4)|2078 (ERG)|2113 (ETS1)|2122 (MECOM)|2296 (…
			EC	GO|GO.BP	GO:2000026	regulation of multicellular organismal development	1.97922e-13	2.25552e-08	72	32 (ACACB)|94 (ACVRL1)|182 (JAG1)|187 (APLNR)|285 (ANGPT2)|301 (ANXA1)|302 (ANXA2)|306 (ANXA3)|857 (CAV1)|947 (CD34)|958 (CD40)|1003 (CDH5)|1378 (CR1)|1495 (CTNNA1)|2022 (ENG)|2113 (ETS1)|2296 (FOXC1)|2321 (FLT1)|2335 (FN1)|2624 (GATA2)|2828 (GPR4)|3315 (HSPB1)|3339 (HSPG2)|3665 (IRF7)|3688 (ITGB1)|3910 (LAMA4)|3911 (LAMA5)|4005 (LMO2)|4017 (LOXL2)|4256 (MGP)|4487 (MSX1)|4846 (NOS3)|4881 (NPR1)|4…
			EC	GO|GO.CC	GO:0005912	adherens junction	2.11983e-13	2.41576e-08	34	81 (ACTN4)|182 (JAG1)|301 (ANXA1)|302 (ANXA2)|308 (ANXA5)|682 (BSG)|857 (CAV1)|966 (CD59)|977 (CD151)|1003 (CDH5)|1495 (CTNNA1)|2022 (ENG)|2321 (FLT1)|3315 (HSPB1)|3339 (HSPG2)|3672 (ITGA1)|3688 (ITGB1)|3717 (JAK2)|3987 (LIMS1)|6237 (RRAS)|6282 (S100A11)|6645 (SNTB2)|7010 (TEK)|7041 (TGFB1I1)|7431 (VIM)|7525 (YES1)|8826 (IQGAP1)|10395 (DLC1)|10544 (PROCR)|26136 (TES)|29766 (TMOD3)|79026 (AHNAK)|8…
			EC	GO|GO.BP	GO:0007166	cell surface receptor signaling pathway	2.92215e-13	3.33009e-08	90	94 (ACVRL1)|182 (JAG1)|285 (ANGPT2)|301 (ANXA1)|302 (ANXA2)|306 (ANXA3)|682 (BSG)|857 (CAV1)|958 (CD40)|966 (CD59)|977 (CD151)|1003 (CDH5)|1030 (CDKN2B)|1282 (COL4A1)|1378 (CR1)|1495 (CTNNA1)|1604 (CD55)|1997 (ELF1)|2022 (ENG)|2050 (EPHB4)|2296 (FOXC1)|2321 (FLT1)|2324 (FLT4)|2335 (FN1)|2615 (LRRC32)|2624 (GATA2)|2634 (GBP2)|3090 (HIC1)|3315 (HSPB1)|3384 (ICAM2)|3454 (IFNAR1)|3480 (IGF1R)|3554 (I…
			EC	GO|GO.BP	GO:0006928	movement of cell or subcellular component	3.71077e-13	4.22879e-08	73	81 (ACTN4)|94 (ACVRL1)|182 (JAG1)|285 (ANGPT2)|301 (ANXA1)|306 (ANXA3)|308 (ANXA5)|389 (RHOC)|682 (BSG)|857 (CAV1)|947 (CD34)|958 (CD40)|977 (CD151)|1495 (CTNNA1)|2022 (ENG)|2050 (EPHB4)|2113 (ETS1)|2296 (FOXC1)|2321 (FLT1)|2324 (FLT4)|2335 (FN1)|2624 (GATA2)|2702 (GJA5)|3315 (HSPB1)|3480 (IGF1R)|3554 (IL1R1)|3672 (ITGA1)|3688 (ITGB1)|3717 (JAK2)|3764 (KCNJ8)|3784 (KCNQ1)|3910 (LAMA4)|3911 (LAMA5…
			EC	GO|GO.BP	GO:0009888	tissue development	4.88783e-13	5.57017e-08	69	94 (ACVRL1)|182 (JAG1)|301 (ANXA1)|302 (ANXA2)|389 (RHOC)|682 (BSG)|839 (CASP6)|857 (CAV1)|871 (SERPINH1)|947 (CD34)|977 (CD151)|1003 (CDH5)|1282 (COL4A1)|2012 (EMP1)|2022 (ENG)|2296 (FOXC1)|2335 (FN1)|2701 (GJA4)|2702 (GJA5)|2828 (GPR4)|3688 (ITGB1)|3717 (JAK2)|3911 (LAMA5)|3915 (LAMC1)|4017 (LOXL2)|4091 (SMAD6)|4256 (MGP)|4487 (MSX1)|4846 (NOS3)|5175 (PECAM1)|5420 (PODXL)|5552 (SRGN)|5583 (PRKC…
			EC	GO|GO.CC	GO:0070161	anchoring junction	4.89028e-13	5.57296e-08	34	81 (ACTN4)|182 (JAG1)|301 (ANXA1)|302 (ANXA2)|308 (ANXA5)|682 (BSG)|857 (CAV1)|966 (CD59)|977 (CD151)|1003 (CDH5)|1495 (CTNNA1)|2022 (ENG)|2321 (FLT1)|3315 (HSPB1)|3339 (HSPG2)|3672 (ITGA1)|3688 (ITGB1)|3717 (JAK2)|3987 (LIMS1)|6237 (RRAS)|6282 (S100A11)|6645 (SNTB2)|7010 (TEK)|7041 (TGFB1I1)|7431 (VIM)|7525 (YES1)|8826 (IQGAP1)|10395 (DLC1)|10544 (PROCR)|26136 (TES)|29766 (TMOD3)|79026 (AHNAK)|8…
			EC	GO|GO.BP	GO:0051716	cellular response to stimulus	5.42854e-13	6.18636e-08	164	81 (ACTN4)|94 (ACVRL1)|182 (JAG1)|187 (APLNR)|285 (ANGPT2)|301 (ANXA1)|302 (ANXA2)|306 (ANXA3)|308 (ANXA5)|389 (RHOC)|682 (BSG)|839 (CASP6)|840 (CASP7)|857 (CAV1)|947 (CD34)|958 (CD40)|966 (CD59)|977 (CD151)|1003 (CDH5)|1030 (CDKN2B)|1282 (COL4A1)|1317 (SLC31A1)|1378 (CR1)|1390 (CREM)|1495 (CTNNA1)|1604 (CD55)|1997 (ELF1)|2022 (ENG)|2050 (EPHB4)|2078 (ERG)|2113 (ETS1)|2122 (MECOM)|2296 (FOXC1)|23…
			EC	GO|GO.BP	GO:0010631	epithelial cell migration	6.31218e-13	7.19337e-08	27	94 (ACVRL1)|285 (ANGPT2)|301 (ANXA1)|306 (ANXA3)|958 (CD40)|2050 (EPHB4)|2113 (ETS1)|2324 (FLT4)|2624 (GATA2)|3315 (HSPB1)|3688 (ITGB1)|4017 (LOXL2)|4846 (NOS3)|5175 (PECAM1)|5547 (PRCP)|7010 (TEK)|7424 (VEGFC)|11235 (PDCD10)|25865 (PRKD2)|29775 (CARD10)|29941 (PKN3)|54567 (DLL4)|56999 (ADAMTS9)|57381 (RHOJ)|79812 (MMRN2)|90627 (STARD13)|161198 (CLEC14A)
			EC	GO|GO.BP	GO:0060429	epithelium development	7.2626e-13	8.27646e-08	52	94 (ACVRL1)|182 (JAG1)|301 (ANXA1)|302 (ANXA2)|389 (RHOC)|839 (CASP6)|857 (CAV1)|947 (CD34)|977 (CD151)|1003 (CDH5)|1282 (COL4A1)|2022 (ENG)|2296 (FOXC1)|2701 (GJA4)|2702 (GJA5)|2828 (GPR4)|3717 (JAK2)|3911 (LAMA5)|4091 (SMAD6)|4487 (MSX1)|5175 (PECAM1)|5420 (PODXL)|5583 (PRKCH)|6591 (SNAI2)|6788 (STK3)|6909 (TBX2)|6926 (TBX3)|7041 (TGFB1I1)|7122 (CLDN5)|7424 (VEGFC)|7431 (VIM)|7547 (ZIC3)|8322 (…
			EC	GO|GO.BP	GO:0090132	epithelium migration	7.74686e-13	8.82832e-08	27	94 (ACVRL1)|285 (ANGPT2)|301 (ANXA1)|306 (ANXA3)|958 (CD40)|2050 (EPHB4)|2113 (ETS1)|2324 (FLT4)|2624 (GATA2)|3315 (HSPB1)|3688 (ITGB1)|4017 (LOXL2)|4846 (NOS3)|5175 (PECAM1)|5547 (PRCP)|7010 (TEK)|7424 (VEGFC)|11235 (PDCD10)|25865 (PRKD2)|29775 (CARD10)|29941 (PKN3)|54567 (DLL4)|56999 (ADAMTS9)|57381 (RHOJ)|79812 (MMRN2)|90627 (STARD13)|161198 (CLEC14A)
			EC	GO|GO.BP	GO:0045766	positive regulation of angiogenesis	8.98412e-13	1.02383e-07	21	94 (ACVRL1)|187 (APLNR)|285 (ANGPT2)|301 (ANXA1)|306 (ANXA3)|947 (CD34)|958 (CD40)|1003 (CDH5)|2022 (ENG)|2113 (ETS1)|2321 (FLT1)|2624 (GATA2)|3315 (HSPB1)|3688 (ITGB1)|4846 (NOS3)|6237 (RRAS)|7010 (TEK)|7424 (VEGFC)|25865 (PRKD2)|51129 (ANGPTL4)|57381 (RHOJ)
			EC	GO|GO.BP	GO:0051179	localization	9.54986e-13	1.0883e-07	150	32 (ACACB)|81 (ACTN4)|94 (ACVRL1)|182 (JAG1)|187 (APLNR)|285 (ANGPT2)|301 (ANXA1)|302 (ANXA2)|306 (ANXA3)|308 (ANXA5)|368 (ABCC6)|389 (RHOC)|682 (BSG)|689 (BTF3)|857 (CAV1)|947 (CD34)|958 (CD40)|966 (CD59)|977 (CD151)|1317 (SLC31A1)|1378 (CR1)|1495 (CTNNA1)|1604 (CD55)|2022 (ENG)|2050 (EPHB4)|2113 (ETS1)|2296 (FOXC1)|2321 (FLT1)|2324 (FLT4)|2335 (FN1)|2615 (LRRC32)|2624 (GATA2)|2634 (GBP2)|2701 (…
			EC	GO|GO.BP	GO:0090130	tissue migration	1.15937e-12	1.32122e-07	27	94 (ACVRL1)|285 (ANGPT2)|301 (ANXA1)|306 (ANXA3)|958 (CD40)|2050 (EPHB4)|2113 (ETS1)|2324 (FLT4)|2624 (GATA2)|3315 (HSPB1)|3688 (ITGB1)|4017 (LOXL2)|4846 (NOS3)|5175 (PECAM1)|5547 (PRCP)|7010 (TEK)|7424 (VEGFC)|11235 (PDCD10)|25865 (PRKD2)|29775 (CARD10)|29941 (PKN3)|54567 (DLL4)|56999 (ADAMTS9)|57381 (RHOJ)|79812 (MMRN2)|90627 (STARD13)|161198 (CLEC14A)
			EC	GO|GO.BP	GO:0008283	cell proliferation	1.24089e-12	1.41412e-07	71	94 (ACVRL1)|182 (JAG1)|187 (APLNR)|301 (ANXA1)|302 (ANXA2)|857 (CAV1)|947 (CD34)|958 (CD40)|977 (CD151)|1030 (CDKN2B)|1163 (CKS1B)|1495 (CTNNA1)|1604 (CD55)|2012 (EMP1)|2078 (ERG)|2113 (ETS1)|2122 (MECOM)|2296 (FOXC1)|2321 (FLT1)|2324 (FLT4)|2335 (FN1)|2615 (LRRC32)|2624 (GATA2)|3480 (IGF1R)|3490 (IGFBP7)|3672 (ITGA1)|3688 (ITGB1)|3717 (JAK2)|3911 (LAMA5)|3915 (LAMC1)|4017 (LOXL2)|4091 (SMAD6)|44…
			EC	GO|GO.BP	GO:0043534	blood vessel endothelial cell migration	1.35533e-12	1.54453e-07	20	94 (ACVRL1)|285 (ANGPT2)|301 (ANXA1)|958 (CD40)|2050 (EPHB4)|2113 (ETS1)|2624 (GATA2)|3315 (HSPB1)|3688 (ITGB1)|4846 (NOS3)|5547 (PRCP)|7424 (VEGFC)|11235 (PDCD10)|25865 (PRKD2)|29775 (CARD10)|54567 (DLL4)|57381 (RHOJ)|79812 (MMRN2)|90627 (STARD13)|161198 (CLEC14A)
			EC	GO|GO.BP	GO:0042060	wound healing	1.67735e-12	1.9115e-07	33	94 (ACVRL1)|301 (ANXA1)|302 (ANXA2)|308 (ANXA5)|389 (RHOC)|857 (CAV1)|947 (CD34)|958 (CD40)|966 (CD59)|977 (CD151)|2113 (ETS1)|2335 (FN1)|2624 (GATA2)|2828 (GPR4)|3315 (HSPB1)|3717 (JAK2)|4846 (NOS3)|5175 (PECAM1)|5265 (SERPINA1)|5547 (PRCP)|5583 (PRKCH)|7035 (TFPI)|7056 (THBD)|7076 (TIMP1)|7450 (VWF)|8323 (FZD6)|10544 (PROCR)|11235 (PDCD10)|22915 (MMRN1)|26509 (MYOF)|30846 (EHD2)|135228 (CD109)|…
			EC	GO|GO.BP	GO:0023052	signaling	1.82677e-12	2.08179e-07	148	81 (ACTN4)|94 (ACVRL1)|182 (JAG1)|187 (APLNR)|285 (ANGPT2)|301 (ANXA1)|302 (ANXA2)|306 (ANXA3)|308 (ANXA5)|389 (RHOC)|682 (BSG)|857 (CAV1)|947 (CD34)|958 (CD40)|966 (CD59)|977 (CD151)|1003 (CDH5)|1030 (CDKN2B)|1282 (COL4A1)|1378 (CR1)|1390 (CREM)|1495 (CTNNA1)|1604 (CD55)|1889 (ECE1)|1997 (ELF1)|2022 (ENG)|2050 (EPHB4)|2078 (ERG)|2122 (MECOM)|2296 (FOXC1)|2321 (FLT1)|2324 (FLT4)|2335 (FN1)|2615 (…
			EC	GO|GO.BP	GO:0023051	regulation of signaling	2.28527e-12	2.60429e-07	99	81 (ACTN4)|94 (ACVRL1)|182 (JAG1)|187 (APLNR)|301 (ANXA1)|302 (ANXA2)|306 (ANXA3)|308 (ANXA5)|389 (RHOC)|857 (CAV1)|958 (CD40)|1030 (CDKN2B)|1495 (CTNNA1)|1604 (CD55)|1889 (ECE1)|1997 (ELF1)|2022 (ENG)|2050 (EPHB4)|2122 (MECOM)|2321 (FLT1)|2324 (FLT4)|2335 (FN1)|2624 (GATA2)|2702 (GJA5)|2828 (GPR4)|3090 (HIC1)|3315 (HSPB1)|3480 (IGF1R)|3554 (IL1R1)|3665 (IRF7)|3672 (ITGA1)|3688 (ITGB1)|3717 (JAK2…
			EC	GO|GO.BP	GO:0001667	ameboidal-type cell migration	2.53157e-12	2.88497e-07	30	94 (ACVRL1)|285 (ANGPT2)|301 (ANXA1)|306 (ANXA3)|958 (CD40)|2050 (EPHB4)|2113 (ETS1)|2324 (FLT4)|2624 (GATA2)|3315 (HSPB1)|3688 (ITGB1)|3911 (LAMA5)|4017 (LOXL2)|4846 (NOS3)|5175 (PECAM1)|5547 (PRCP)|7010 (TEK)|7076 (TIMP1)|7424 (VEGFC)|11235 (PDCD10)|25865 (PRKD2)|29775 (CARD10)|29941 (PKN3)|54567 (DLL4)|56999 (ADAMTS9)|57381 (RHOJ)|64321 (SOX17)|79812 (MMRN2)|90627 (STARD13)|161198 (CLEC14A)
			EC	GO|GO.BP	GO:0034330	cell junction organization	2.94378e-12	3.35473e-07	24	81 (ACTN4)|94 (ACVRL1)|389 (RHOC)|857 (CAV1)|977 (CD151)|1003 (CDH5)|1495 (CTNNA1)|2335 (FN1)|2701 (GJA4)|2702 (GJA5)|3911 (LAMA5)|3915 (LAMC1)|3987 (LIMS1)|5583 (PRKCH)|6591 (SNAI2)|7010 (TEK)|7122 (CLDN5)|8826 (IQGAP1)|10395 (DLC1)|29984 (RHOD)|51599 (LSR)|57493 (HEG1)|153562 (MARVELD2)|100506658 (OCLN)
			EC	GO|GO.BP	GO:0042127	regulation of cell proliferation	3.99851e-12	4.55671e-07	61	94 (ACVRL1)|182 (JAG1)|187 (APLNR)|301 (ANXA1)|302 (ANXA2)|857 (CAV1)|958 (CD40)|1030 (CDKN2B)|1495 (CTNNA1)|1604 (CD55)|2113 (ETS1)|2321 (FLT1)|2324 (FLT4)|2335 (FN1)|2615 (LRRC32)|2624 (GATA2)|3480 (IGF1R)|3490 (IGFBP7)|3672 (ITGA1)|3688 (ITGB1)|3717 (JAK2)|3911 (LAMA5)|3915 (LAMC1)|4091 (SMAD6)|4487 (MSX1)|4846 (NOS3)|4881 (NPR1)|4953 (ODC1)|5583 (PRKCH)|6282 (S100A11)|6591 (SNAI2)|6788 (STK3)…
			EC	GO|GO.BP	GO:0071310	cellular response to organic substance	4.12929e-12	4.70573e-07	80	94 (ACVRL1)|285 (ANGPT2)|301 (ANXA1)|302 (ANXA2)|308 (ANXA5)|839 (CASP6)|840 (CASP7)|857 (CAV1)|958 (CD40)|1003 (CDH5)|1030 (CDKN2B)|1282 (COL4A1)|1495 (CTNNA1)|1604 (CD55)|1997 (ELF1)|2022 (ENG)|2296 (FOXC1)|2321 (FLT1)|2324 (FLT4)|2335 (FN1)|2615 (LRRC32)|2634 (GBP2)|3315 (HSPB1)|3454 (IFNAR1)|3480 (IGF1R)|3490 (IGFBP7)|3554 (IL1R1)|3665 (IRF7)|3688 (ITGB1)|3717 (JAK2)|3784 (KCNQ1)|3911 (LAMA5)…
			EC	GO|GO.BP	GO:0010594	regulation of endothelial cell migration	6.81503e-12	7.76641e-07	21	94 (ACVRL1)|285 (ANGPT2)|301 (ANXA1)|306 (ANXA3)|958 (CD40)|2113 (ETS1)|2324 (FLT4)|2624 (GATA2)|3315 (HSPB1)|4846 (NOS3)|5547 (PRCP)|7010 (TEK)|7424 (VEGFC)|11235 (PDCD10)|25865 (PRKD2)|29775 (CARD10)|54567 (DLL4)|56999 (ADAMTS9)|57381 (RHOJ)|79812 (MMRN2)|90627 (STARD13)
			EC	GO|GO.BP	GO:0007154	cell communication	7.81182e-12	8.90235e-07	147	81 (ACTN4)|94 (ACVRL1)|182 (JAG1)|187 (APLNR)|285 (ANGPT2)|301 (ANXA1)|302 (ANXA2)|306 (ANXA3)|308 (ANXA5)|389 (RHOC)|682 (BSG)|857 (CAV1)|947 (CD34)|958 (CD40)|966 (CD59)|977 (CD151)|1003 (CDH5)|1030 (CDKN2B)|1282 (COL4A1)|1378 (CR1)|1390 (CREM)|1495 (CTNNA1)|1604 (CD55)|1997 (ELF1)|2022 (ENG)|2050 (EPHB4)|2078 (ERG)|2122 (MECOM)|2296 (FOXC1)|2321 (FLT1)|2324 (FLT4)|2335 (FN1)|2615 (LRRC32)|2624…
			EC	GO|GO.BP	GO:0010646	regulation of cell communication	8.11784e-12	9.25109e-07	97	81 (ACTN4)|94 (ACVRL1)|182 (JAG1)|187 (APLNR)|301 (ANXA1)|306 (ANXA3)|308 (ANXA5)|389 (RHOC)|857 (CAV1)|958 (CD40)|1030 (CDKN2B)|1495 (CTNNA1)|1604 (CD55)|1997 (ELF1)|2022 (ENG)|2050 (EPHB4)|2122 (MECOM)|2321 (FLT1)|2324 (FLT4)|2335 (FN1)|2624 (GATA2)|2702 (GJA5)|2828 (GPR4)|3090 (HIC1)|3315 (HSPB1)|3480 (IGF1R)|3554 (IL1R1)|3665 (IRF7)|3672 (ITGA1)|3688 (ITGB1)|3717 (JAK2)|3987 (LIMS1)|4091 (SMA…
			EC	GO|GO.BP	GO:1904018	positive regulation of vasculature development	1.13613e-11	1.29474e-06	21	94 (ACVRL1)|187 (APLNR)|285 (ANGPT2)|301 (ANXA1)|306 (ANXA3)|947 (CD34)|958 (CD40)|1003 (CDH5)|2022 (ENG)|2113 (ETS1)|2321 (FLT1)|2624 (GATA2)|3315 (HSPB1)|3688 (ITGB1)|4846 (NOS3)|6237 (RRAS)|7010 (TEK)|7424 (VEGFC)|25865 (PRKD2)|51129 (ANGPTL4)|57381 (RHOJ)
[truncated: 385 more rows]

## Sheet: S5C Table - TCX Downregulated
		Cell	GO_Group	DataSetID	DataSetName	p	Bonferroni	#Genes	Genes
		M	GO|GO.BP	GO:0001775	cell activation	9.08699e-08	0.0103555	16	60 (ACTB)|923 (CD6)|4353 (MPO)|5199 (CFP)|5452 (POU2F2)|5580 (PRKCD)|8527 (DGKD)|8808 (IL1RL2)|8935 (SKAP2)|9145 (SYNGR1)|9308 (CD83)|23228 (PLCL2)|23308 (ICOSLG)|84959 (UBASH3B)|114548 (NLRP3)|387921 (NHLRC3)
[truncated: 203 more rows]

## Sheet: S5D Table - STG All Genes
			Cell	GO_Group	DataSetID	DataSetName	p	Bonferroni	#Genes	Genes
[truncated: 86 more rows]

## Sheet: S5E Table - STG Upregulated
			Cell	GO_Group	DataSetID	DataSetName	p	Bonferroni	#Genes	Genes
[truncated: 80 more rows]

[truncated: 8 more sheets: S5F Table - STG Downregulated, S5G Table -IFG All Genes, S5H Table - IFG Upregulated, S5I Table - PHG All Genes, S5J Table - PHG Upregulated, S5K Table - PHG Downregulated, S5L Table - CBE All Genes, S5M Table - CBE Upregulated]
