# Supplementary material for: ESHRD: deconvolution of brain homogenate RNA expression data to identify cell-type-specific alterations in Alzheimer’s disease
Source: Aging (Albany NY). 2020 Mar 2;12(5):4124–62. doi: 10.18632/aging.102840 (PMC7093163; doi:10.18632/aging.102840)
Supplement: Supplementary Table 6 [file aging-12-102840-s001..xlsx]

## Sheet: S6 Table
	Region	Cell	ID	Description	setSize	enrichmentScore	NES	pvalue	p.adjust	qvalues	rank	leading_edge	core_enrichment
	TCX	N	R-HSA-375276	Peptide ligand-binding receptors	19	-0.677763	-1.87061	0.000344986	0.0169043	0.0108007	131	tags=58%, list=20%, signal=48%	4988/4887/2587/6866/4922/4923/2834/6869/5179/6750
	TCX	N	R-HSA-392499	Metabolism of proteins	50	-0.522927	-1.71788	0.000949067	0.0465043	0.0108007	112	tags=38%, list=17%, signal=34%	1395/8786/140766/53942/4588/84871/51299/4311/3623/442117/7857/115827/1114/5865/793/5122/5179/7425
	TCX	M	R-HSA-168256	Immune System	211	0.486924	1.45751	9.999e-05	0.010399	0.00905173	177	tags=39%, list=28%, signal=42%	2215/4057/6280/6279/6347/6614/9021/3383/2357/9173/2162/30835/7132/84329/4860/4688/2268/2207/1435/3693/3101/54209/3566/714/728/713/719/5788/7097/7040/7100/718/1230/2683/1439/3303/1520/4791/4615/7128/7096/6556/4360/3162/118788/7133/54918/7408/834/929/25840/80301/10628/3689/8673/79792/2212/4689/3958/79155/7305/9261/2533/6039/3570/5696/3659/10163/963/10333/51284/712/1536/4939/10148/972/150372/3635/14…
	TCX	O	R-HSA-1474244	Extracellular matrix organization	25	0.714726	2.09823	0.000302069	0.0078538	0.00242263	29	tags=48%, list=9%, signal=47%	9509/1634/4239/8038/1278/176/3691/1281/1277/5118/780/2202
	TCX	O	R-HSA-3781865	Diseases of glycosylation	12	0.810192	1.98763	0.000328785	0.00854841	0.00242263	24	tags=58%, list=7%, signal=56%	5549/9509/1634/176/57188/10418/9469
	TCX	O	R-HSA-112316	Neuronal System	19	-0.645883	-2.00073	0.000843407	0.0219286	0.00414305	55	tags=74%, list=17%, signal=65%	1137/80059/57497/347730/114798/22865/347731/2556/2892/51764/131096/83988/5923
	TCX	O	R-HSA-1474290	Collagen formation	11	0.764758	1.8306	0.00183272	0.0476508	0.00675214	21	tags=55%, list=6%, signal=53%	9509/1278/3691/1281/1277/5118
	STG	N	R-HSA-8986944	Transcriptional Regulation by MECP2	10	-0.868299	-1.9872	0.00012444	0.00597312	0.0049776	33	tags=60%, list=5%, signal=58%	2572/4233/2571/6750/1392
	STG	M	R-HSA-168249	Innate Immune System	140	0.54461	1.55334	9.999e-05	0.009999	0.00452586	244	tags=64%, list=41%, signal=49%	4057/54209/2212/3683/718/1536/6280/5724/712/51284/713/719/3689/929/3687/3903/5788/7305/834/6279/1520/2214/7100/728/1535/10312/714/10855/3684/2268/920/9450/7462/2207/3071/1794/6039/3824/695/7097/3055/7096/1522/5696/79792/23601/64581/7409/4688/963/3303/7133/7454/10628/25840/3937/79930/10333/122618/2896/8635/23218/9261/5777/7128/79155/10163/2683/84329/2209/6556/4615/4067/5336/54918/81622/84433/10695…
	STG	M	R-HSA-168256	Immune System	202	0.54222	1.55881	9.999e-05	0.009999	0.00452586	244	tags=60%, list=41%, signal=54%	4057/54209/2212/972/3683/718/942/1536/6280/5724/712/51284/713/719/3689/929/3687/3903/5788/7305/834/6279/3936/1520/3109/1230/118788/2214/7100/728/3587/3111/1535/10312/714/10855/1436/3684/2268/2533/7040/920/9450/7462/3394/2207/3071/1794/4939/6039/3824/695/7097/3055/7096/1522/5696/3162/79792/23601/3635/64581/6614/7409/4688/963/3303/3693/1435/84868/7133/7454/10628/3663/2162/25840/3937/79930/10333/122…
	STG	O	R-HSA-9006934	Signaling by Receptor Tyrosine Kinases	13	0.768628	1.99041	0.000554426	0.0133062	0.00992131	49	tags=54%, list=15%, signal=48%	1281/3481/64759/1278/1277/2591/2534
	DLPFC	M	R-HSA-1474244	Extracellular matrix organization	19	0.713499	1.89483	0.000404694	0.0364225	0.0281156	79	tags=47%, list=14%, signal=42%	6696/85301/3693/3687/7040/3689/5054/5045/1520
	FP	A	R-HSA-168249	Innate Immune System	10	0.803791	1.95329	0.000180734	0.00560275	0.00551714	13	tags=50%, list=3%, signal=50%	960/2353/721/10451/720
	IFG	N	R-HSA-388396	GPCR downstream signalling	54	-0.548195	-1.74217	0.000310978	0.0149269	0.00435422	42	tags=37%, list=7%, signal=38%	5581/7432/3350/5746/54331/5021/85397/3363/3358/59350/1816/5999/128674/4923/2587/116/1392/6750/4887
	IFG	N	R-HSA-500792	GPCR ligand binding	39	-0.593002	-1.8039	0.000317931	0.0152607	0.00435422	42	tags=44%, list=7%, signal=43%	7432/3350/5746/54331/5021/3363/3358/59350/1816/128674/4923/2587/116/1392/6750/4887
	IFG	N	R-HSA-375276	Peptide ligand-binding receptors	18	-0.714312	-1.89407	0.000343958	0.01651	0.00435422	42	tags=39%, list=7%, signal=37%	59350/128674/4923/2587/6750/4887
	IFG	N	R-HSA-372790	Signaling by GPCR	56	-0.534938	-1.70674	0.00041365	0.0198552	0.00435422	42	tags=25%, list=7%, signal=26%	85397/3363/3358/59350/1816/5999/128674/4923/2587/116/1392/6750/4887
	IFG	N	R-HSA-373076	Class A/1 (Rhodopsin-like receptors)	30	-0.606987	-1.77578	0.000866927	0.0416125	0.00730044	42	tags=33%, list=7%, signal=33%	3363/3358/59350/1816/128674/4923/2587/6750/4887
	IFG	M	R-HSA-202733	Cell surface interactions at the vascular wall	16	0.825371	2.00989	0.000114443	0.0114443	0.00987821	44	tags=69%, list=7%, signal=65%	6404/6693/2207/8832/972/3683/9056/3689/3687/7040/3635
	IFG	M	R-HSA-168249	Innate Immune System	140	0.477688	1.49661	0.000301054	0.0301054	0.0129928	241	tags=56%, list=40%, signal=44%	4057/5724/719/2207/54209/3683/10855/718/51284/1520/3689/3687/7305/1536/64581/728/8673/2268/122618/81622/84433/5788/150372/84329/3903/7462/3071/25840/5336/23218/712/9261/7318/9450/6039/4125/920/7100/23601/1794/6195/4067/79792/4688/929/10312/2212/7096/79930/4793/340061/23406/1522/8635/713/1535/714/5777/2683/834/7867/7409/80301/10333/2896/6793/1509/7454/4772/5970/54918/3684/2588/7133/695/79155/963/3…
	PHG	M	R-HSA-2132295	MHC class II antigen presentation	10	0.774449	1.81031	0.000351247	0.0351247	0.0310576	39	tags=40%, list=6%, signal=38%	3111/972/3109/1520
	PHG	A	R-HSA-168249	Innate Immune System	10	0.763014	1.82177	0.000871622	0.0270203	0.0238549	13	tags=40%, list=3%, signal=40%	721/960/720/2353
	PHG	O	R-HSA-9006934	Signaling by Receptor Tyrosine Kinases	13	0.689981	1.78849	0.00203341	0.0488017	0.0190826	18	tags=38%, list=6%, signal=38%	1277/1278/3481/1281/64759
	CBE	M	R-HSA-168249	Innate Immune System	146	0.531117	1.58482	9.999e-05	0.010399	0.00264294	179	tags=42%, list=28%, signal=40%	6280/2215/6279/2357/3303/4688/51284/5788/713/719/714/2207/7096/3689/2212/3304/712/10333/1536/2214/122618/1520/963/7100/2209/8673/1794/11010/1535/4860/3937/728/4689/4057/7409/3684/79155/5724/7305/54209/10855/5971/2268/929/150372/3903/6556/9535/7462/6518/7133/7097/718/7318/6039/10312/6793/79930/834/5777/4791/5336
	CBE	M	R-HSA-168256	Immune System	211	0.535058	1.61418	9.999e-05	0.010399	0.00264294	157	tags=37%, list=24%, signal=42%	6280/2215/6279/4360/2357/9021/6347/3303/2162/4688/51284/5788/713/719/3936/3383/714/2207/1230/7096/1439/3689/2533/2212/118788/3304/712/10333/9173/1536/6614/2214/127544/122618/942/1520/963/3566/7100/2209/8673/1441/1794/11010/1535/4860/3937/728/4689/4057/10148/7409/3684/79155/5724/7305/54209/10855/5971/2268/929/150372/89790/3587/3903/6556/9535/7462/7040/5293/6518/7133/7097/7132/718/7318/6039/10312/9…
	CBE	M	R-HSA-6798695	Neutrophil degranulation	85	0.552943	1.61509	0.000100432	0.0104449	0.00264294	160	tags=44%, list=25%, signal=38%	6280/2215/6279/2357/3303/5788/719/2207/3689/2212/3304/1536/1520/963/8673/1794/11010/1535/4860/728/4057/3684/5724/7305/10855/2268/929/150372/3903/6556/9535/6518/7133/7097/718/10312/6793
	CBE	M	R-HSA-1280218	Adaptive Immune System	75	0.552223	1.60222	0.000201167	0.0209213	0.0039704	157	tags=43%, list=24%, signal=36%	4360/9021/4688/5788/3383/7096/3689/2533/118788/10333/1536/6614/2214/127544/942/1520/2209/8673/1535/3937/4689/7409/7305/54209/929/89790/3903/5293/7097/718/7318/972
	CBE	A	R-HSA-381426	Regulation of Insulin-like Growth Factor (IGF) transport and uptake by Insulin-like Growth Factor Binding Proteins (IGFBPs)	11	0.753772	1.94109	0.0013558	0.047453	0.035679	65	tags=64%, list=16%, signal=55%	3485/54757/720/91851/8404/721/4052
